# Supplementary material for: Lanthanide-induced conformational change of methanol dehydrogenase involving coordination change of cofactor pyrroloquinoline quinone
Source: Royal Society of Chemistry journal article supplement (doi:10.1039/c9cp03953h), 2019-01-01
Supplement: c9cp03953h1.pdf [file c9cp03953h1.pdf]

## Electronic Supporting Information

Title: Lanthanide-induced conformational change of methanol dehydrogenase involving coordination change of cofactor pyrroloquinoline quinone

Author: Satoru Tsushima

### Contents:

**Fig.S1:** Time evolution of RMSD (excluding waters and counterions) in all MD simulations

**Fig.S2:** Radial distribution functions around central metal ion in all MD simulations (X-axis in Å)

**Fig.S3** Coordination sphere around  $\text{Eu}^{3+}$  in  $\text{XoxF}^-$  and  $\text{MxaF}^-$ -type Eu-MDH obtained by MD simulation.

XYZ coordinates all atoms excluding waters and counterions of MD simulations of Eu-MDH and Yb-MDH of  $\text{XoxF}^-$ -type at  $t = 50$  ns

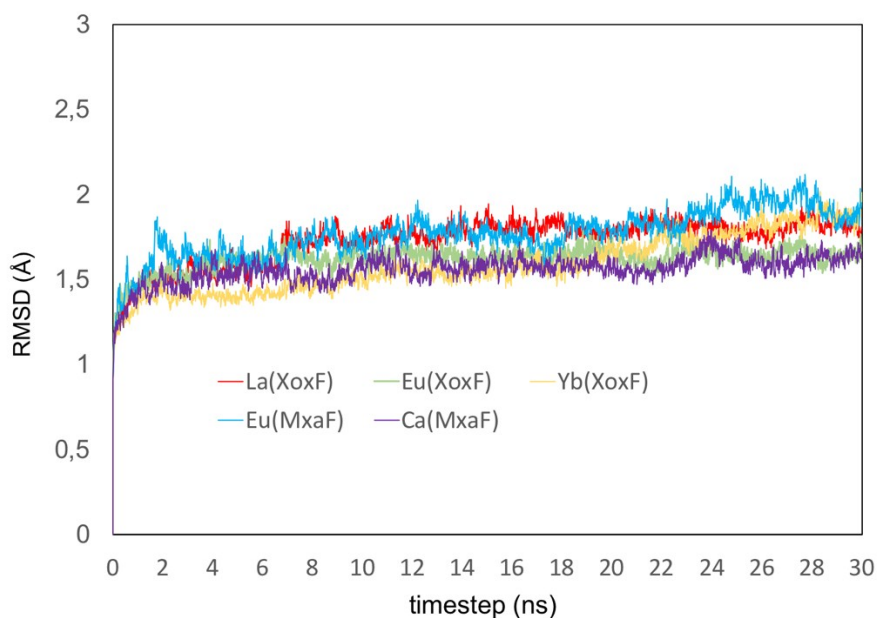

**Fig.S1** Time evolution of RMSD (excluding waters and counterions) of all MD simulations

### La-MDH of XoxF type

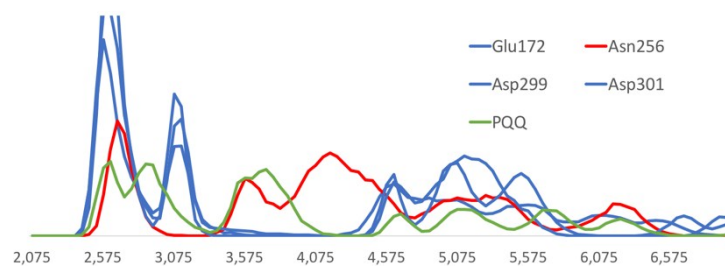

### Eu-MDH of XoxF type

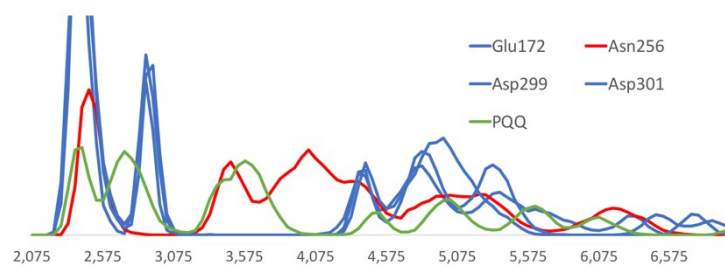

### Yb-MDH of XoxF type

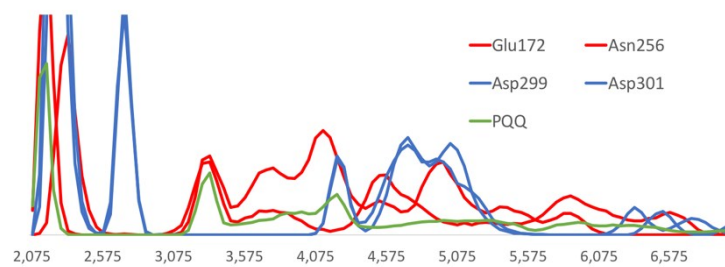

### Ca-MDH of MxaF type

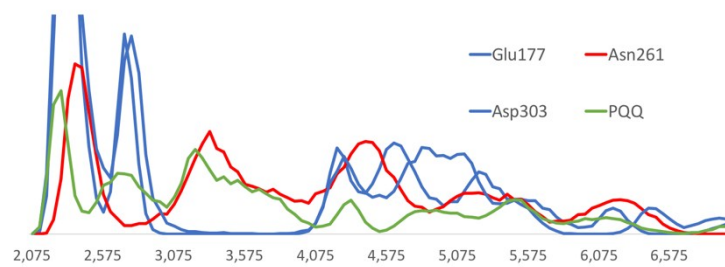

### Eu-MDH of MxaF type

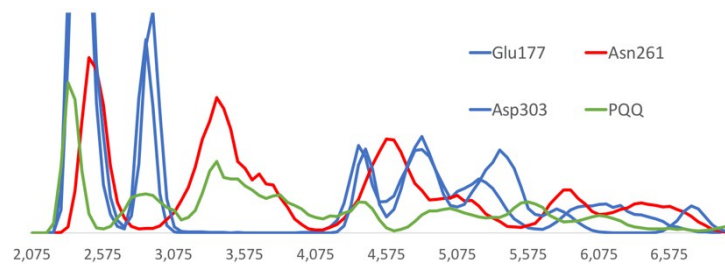

**Fig.S2** Radial distribution functions around central metal ion in all MD simulations (X-axis in Å)

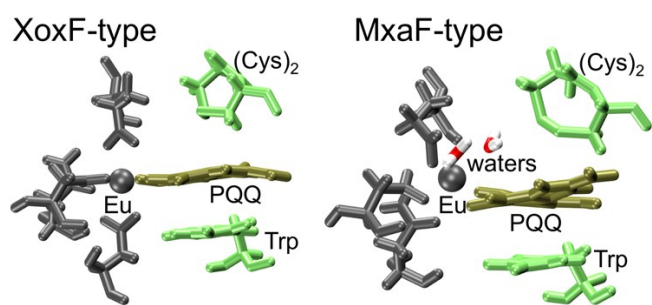

**Fig.S3** Coordination sphere around  $\text{Eu}^{3+}$  in XoxF- and MxaF-type Eu-MDH obtained from MD simulation.

## Eu-MDH (XoxF type)

|          |         |         |   |         |         |         |         |   |        |         |          |         |   |   |
|----------|---------|---------|---|---------|---------|---------|---------|---|--------|---------|----------|---------|---|---|
|          |         |         |   | -3.9070 | 7.5360  | 24.8780 | C       | 0 | 0.9970 | -1.4860 | 30.6660  | H       | 0 |   |
|          |         |         |   | -3.6060 | 8.3740  | 24.2490 | H       | 0 | 2.6740 | -0.4120 | 29.8170  | N       | 0 |   |
| -10.4320 | 8.1090  | 23.1150 | N | 0       | -4.9920 | 7.4340  | 24.9170 | H | 0      | 2.8780  | 0.4500   | 29.3320 | H | 0 |
| -11.0670 | 8.6590  | 22.5540 | H | 0       | -3.3930 | 7.7070  | 25.8240 | H | 0      | 3.3380  | -0.3710  | 30.5770 | H | 0 |
| -10.5680 | 8.3200  | 24.0930 | H | 0       | -3.3610 | 2.3780  | 25.1180 | C | 0      | 2.8730  | -1.1180  | 29.1220 | H | 0 |
| -10.8900 | 7.2180  | 22.9860 | H | 0       | -2.2440 | 1.7080  | 25.1100 | O | 0      | -0.3690 | -2.7360  | 25.8350 | C | 0 |
| -9.0400  | 7.9830  | 22.6730 | C | 0       | -4.4840 | 1.8550  | 25.6030 | N | 0      | 0.4540  | -3.5050  | 26.2550 | O | 0 |
| -9.0590  | 7.5360  | 21.6790 | H | 0       | -5.2730 | 2.4860  | 25.5790 | H | 0      | -1.5750 | -3.2560  | 25.3970 | N | 0 |
| -8.4470  | 9.3490  | 22.2860 | C | 0       | -4.7200 | 0.4700  | 26.1160 | C | 0      | -2.3000 | -2.6570  | 25.0290 | H | 0 |
| -8.3890  | 9.8980  | 23.2250 | H | 0       | -4.0140 | 0.2220  | 26.9080 | H | 0      | -1.8780 | -4.7010  | 25.5360 | C | 0 |
| -7.4260  | 9.2840  | 21.9100 | H | 0       | -6.1770 | 0.3530  | 26.7990 | C | 0      | -1.8870 | -4.9290  | 26.6020 | H | 0 |
| -9.3580  | 10.0440 | 21.3200 | C | 0       | -6.8400 | 0.9610  | 26.1830 | H | 0      | -3.3750 | -4.8520  | 25.1900 | C | 0 |
| -10.0590 | 9.4630  | 20.5420 | O | 0       | -6.5750 | -0.6620 | 26.8150 | H | 0      | -3.9980 | -4.3320  | 25.9180 | H | 0 |
| -9.4420  | 11.3880 | 21.3900 | N | 0       | -6.2820 | 0.9600  | 28.1820 | C | 0      | -3.5250 | -4.5460  | 24.1550 | H | 0 |
| -10.1830 | 11.6700 | 20.7650 | H | 0       | -5.7260 | 0.3080  | 28.8560 | H | 0      | -3.8380 | -6.2960  | 25.2920 | C | 0 |
| -8.9820  | 11.9010 | 22.1290 | H | 0       | -5.7430 | 1.9040  | 28.1040 | H | 0      | -4.8690 | -6.2940  | 24.9370 | H | 0 |
| -8.1720  | 7.1340  | 23.5550 | C | 0       | -7.7040 | 1.2050  | 28.5980 | C | 0      | -3.1810 | -6.9060  | 24.6730 | H | 0 |
| -7.2050  | 6.6370  | 23.0760 | O | 0       | -8.2010 | 1.7810  | 27.8170 | H | 0      | -3.8800 | -6.9490  | 26.7280 | C | 0 |
| -8.4670  | 6.9930  | 24.8660 | N | 0       | -8.1030 | 0.2030  | 28.7540 | H | 0      | -3.4140 | -6.3170  | 27.6940 | O | 0 |
| -9.1090  | 7.6420  | 25.2990 | H | 0       | -7.8250 | 1.8800  | 29.9580 | C | 0      | -4.4180 | -8.0930  | 26.9910 | O | 0 |
| -7.6280  | 6.0610  | 25.6830 | C | 0       | -8.7870 | 1.6680  | 30.4250 | H | 0      | -0.9880 | -5.5740  | 24.7170 | C | 0 |
| -6.6090  | 6.4370  | 25.5890 | H | 0       | -7.0690 | 1.4280  | 30.6010 | H | 0      | -0.7280 | -5.2750  | 23.5060 | O | 0 |
| -7.8830  | 6.3460  | 27.2210 | C | 0       | -7.5700 | 3.3400  | 29.8940 | N | 0      | -0.4490 | -6.6460  | 25.2840 | N | 0 |
| -7.2240  | 5.7250  | 27.8270 | H | 0       | -6.7120 | 3.6510  | 29.4610 | H | 0      | -0.5110 | -6.9500  | 26.7800 | C | 0 |
| -7.6720  | 7.3940  | 27.4350 | H | 0       | -8.3050 | 3.8030  | 29.3790 | H | 0      | -1.4230 | -7.5260  | 26.9380 | H | 0 |
| -9.2620  | 5.8610  | 27.6800 | C | 0       | -7.6670 | 3.8710  | 30.7480 | H | 0      | -0.3890 | -6.0980  | 27.4490 | H | 0 |
| -9.4030  | 4.8350  | 28.3660 | O | 0       | -4.5570 | -0.6540 | 25.0900 | C | 0      | 0.6750  | -7.8720  | 27.0540 | C | 0 |
| -10.1970 | 6.5700  | 27.3640 | O | 0       | -4.0100 | -1.6320 | 25.4830 | O | 0      | 0.5110  | -8.5060  | 27.9260 | H | 0 |
| -7.5760  | 4.5850  | 25.2860 | C | 0       | -4.9100 | -0.4620 | 23.8160 | N | 0      | 1.5120  | -7.2140  | 27.2890 | H | 0 |
| -6.6590  | 3.8620  | 25.7310 | O | 0       | -5.4140 | 0.3660  | 23.5320 | H | 0      | 0.8240  | -8.5970  | 25.7190 | C | 0 |
| -8.5250  | 4.1730  | 24.4680 | N | 0       | -4.7400 | -1.5970 | 22.8090 | C | 0      | 0.2330  | -9.5120  | 25.6770 | H | 0 |
| -9.1030  | 4.8170  | 23.9480 | H | 0       | -4.7550 | -2.5560 | 23.3280 | H | 0      | 1.8520  | -8.9600  | 25.7050 | H | 0 |
| -8.6950  | 2.7220  | 24.1290 | C | 0       | -5.9750 | -1.4660 | 21.8520 | C | 0      | 0.4770  | -7.6160  | 24.5880 | C | 0 |
| -8.6220  | 2.1620  | 25.0610 | H | 0       | -6.1230 | -0.4050 | 21.6510 | H | 0      | 1.3840  | -7.1410  | 24.2140 | H | 0 |
| -10.0450 | 2.4270  | 23.3780 | C | 0       | -5.6770 | -1.9570 | 20.9260 | H | 0      | -0.1720 | -8.2100  | 23.3770 | C | 0 |
| -10.0080 | 2.5130  | 22.2920 | H | 0       | -7.3520 | -2.0340 | 22.2970 | C | 0      | -1.2580 | -8.7610  | 23.4960 | O | 0 |
| -10.3240 | 1.4060  | 23.6370 | H | 0       | -7.6150 | -1.6930 | 23.2980 | H | 0      | 0.4850  | -8.1860  | 22.1990 | N | 0 |
| -11.2560 | 3.3010  | 23.8520 | C | 0       | -8.4870 | -1.4710 | 21.4080 | C | 0      | 1.1980  | -7.4870  | 22.0410 | H | 0 |
| -12.1380 | 2.6610  | 23.8060 | H | 0       | -8.3830 | -0.4200 | 21.1400 | H | 0      | 0.1510  | -9.0150  | 21.0230 | C | 0 |
| -11.0490 | 3.6110  | 24.8760 | H | 0       | -8.6860 | -1.9850 | 20.4670 | H | 0      | 0.9740  | -8.7650  | 20.3530 | H | 0 |
| -11.3820 | 4.5260  | 22.9380 | C | 0       | -9.4250 | -1.4950 | 21.9630 | H | 0      | 0.1670  | -10.0710 | 21.2930 | H | 0 |
| -12.1990 | 4.6310  | 21.9860 | O | 0       | -7.4050 | -3.5470 | 22.1780 | C | 0      | -1.1290 | -8.6210  | 20.2560 | C | 0 |
| -10.6640 | 5.4510  | 23.2030 | O | 0       | -8.4280 | -3.8870 | 22.3410 | H | 0      | -1.5650 | -9.4980  | 19.5480 | O | 0 |
| -7.5820  | 2.2930  | 23.2250 | C | 0       | -7.0570 | -3.8030 | 21.1770 | H | 0      | -1.6870 | -7.4080  | 20.3380 | N | 0 |
| -7.1140  | 1.1900  | 23.3040 | O | 0       | -6.7830 | -3.9580 | 22.9740 | H | 0      | -1.2000 | -6.7510  | 20.9310 | H | 0 |
| -7.0770  | 3.1860  | 22.3430 | N | 0       | -3.4040 | -1.6970 | 22.0910 | C | 0      | -2.9000 | -7.0850  | 19.6330 | C | 0 |
| -7.5530  | 4.0730  | 22.2620 | H | 0       | -3.0220 | -2.7710 | 21.7340 | O | 0      | -3.5960 | -7.9180  | 19.5360 | H | 0 |
| -5.9260  | 2.8510  | 21.4620 | C | 0       | -2.5010 | -0.7190 | 22.2170 | N | 0      | -3.7650 | -5.9910  | 20.4120 | C | 0 |
| -6.0770  | 1.8880  | 20.9750 | H | 0       | -2.8470 | 0.1360  | 22.6300 | H | 0      | -3.1700 | -5.0930  | 20.5760 | H | 0 |
| -5.8800  | 3.9330  | 20.3250 | C | 0       | -1.0890 | -0.7500 | 21.9530 | C | 0      | -4.7120 | -5.7730  | 19.9180 | H | 0 |
| -6.2930  | 4.8210  | 20.8030 | H | 0       | -0.8790 | -1.5920 | 21.3230 | H | 0      | -3.9780 | -6.4450  | 21.8700 | C | 0 |
| -4.8680  | 4.2290  | 20.0490 | H | 0       | -0.7010 | 0.5130  | 21.2010 | C | 0      | -3.0350 | -6.5240  | 22.4120 | H | 0 |
| -6.6830  | 3.7610  | 19.0510 | C | 0       | -1.4950 | 0.6780  | 20.4730 | H | 0      | -4.4450 | -5.6560  | 22.4600 | H | 0 |
| -6.6420  | 4.7010  | 18.4990 | H | 0       | -0.8200 | 1.4540  | 21.7380 | H | 0      | -4.7900 | -7.7310  | 22.0960 | C | 0 |
| -6.0370  | 2.8200  | 18.0230 | C | 0       | 0.6970  | 0.6430  | 20.4440 | C | 0      | -6.0110 | -7.7070  | 21.9320 | O | 0 |
| -6.0540  | 1.8180  | 18.4500 | H | 0       | 0.7500  | 1.5920  | 19.9090 | H | 0      | -4.3740 | -8.8470  | 22.7100 | N | 0 |
| -6.5930  | 3.0010  | 17.1020 | H | 0       | 1.5470  | 0.7810  | 21.1120 | H | 0      | -4.9800 | -9.6430  | 22.5710 | H | 0 |
| -4.9870  | 3.0880  | 17.9080 | H | 0       | 0.7940  | -0.4350 | 19.4320 | C | 0      | -3.4440 | -8.9400  | 23.0930 | H | 0 |
| -8.0850  | 3.3360  | 19.3250 | C | 0       | -0.2060 | -1.1590 | 19.0840 | O | 0      | -2.3910 | -6.5740  | 18.2130 | C | 0 |
| -8.1380  | 2.3730  | 19.8320 | H | 0       | 1.8860  | -0.6710 | 18.8430 | O | 0      | -1.1630 | -6.4940  | 17.9420 | O | 0 |
| -8.6610  | 4.1530  | 19.7600 | H | 0       | -0.2660 | -0.9180 | 23.2110 | C | 0      | -3.2990 | -6.3710  | 17.2330 | N | 0 |
| -8.5730  | 3.1110  | 18.3770 | H | 0       | 0.9390  | -1.1970 | 23.0570 | O | 0      | -4.2720 | -6.2530  | 17.4790 | H | 0 |
| -4.6110  | 2.8690  | 22.2230 | C | 0       | -0.7560 | -0.7200 | 24.4240 | N | 0      | -3.0700 | -5.9990  | 15.8740 | C | 0 |
| -3.6290  | 2.1700  | 21.8350 | O | 0       | -1.6770 | -0.3090 | 24.4780 | H | 0      | -2.3010 | -5.2390  | 15.7340 | H | 0 |
| -4.5940  | 3.5930  | 23.3660 | N | 0       | -0.0800 | -1.2760 | 25.6760 | C | 0      | -2.7770 | -7.2870  | 15.0670 | C | 0 |
| -5.3840  | 4.1680  | 23.6230 | H | 0       | 1.0010  | -1.1940 | 25.5560 | H | 0      | -2.0540 | -7.8130  | 15.6890 | H | 0 |
| -3.5180  | 3.6810  | 24.3050 | C | 0       | -0.5190 | -0.4630 | 26.8920 | C | 0      | -3.6650 | -7.9190  | 15.0860 | H | 0 |
| -2.5650  | 3.7430  | 23.7800 | H | 0       | -0.1900 | 0.5620  | 26.7230 | H | 0      | -2.1210 | -7.1270  | 13.7110 | C | 0 |
| -3.5160  | 4.9970  | 25.1240 | C | 0       | -1.5890 | -0.4220 | 27.0930 | H | 0      | -2.6960 | -6.7750  | 12.5310 | C | 0 |
| -4.5150  | 5.1320  | 25.5390 | H | 0       | 0.2460  | -0.9760 | 28.1010 | C | 0      | -3.7260 | -6.4600  | 12.4470 | H | 0 |
| -2.5590  | 5.0190  | 26.3650 | C | 0       | -0.2310 | -1.8560 | 28.5330 | H | 0      | -1.8060 | -6.7950  | 11.5090 | N | 0 |
| -2.6680  | 4.1270  | 26.9820 | H | 0       | 1.2590  | -1.2230 | 27.7840 | H | 0      | -2.0290 | -6.7120  | 10.5270 | H | 0 |
| -1.5220  | 5.1090  | 26.0420 | H | 0       | 0.3260  | 0.0490  | 29.2700 | C | 0      | -0.5500 | -7.0030  | 11.9690 | C | 0 |
| -2.8170  | 5.8870  | 26.9720 | H | 0       | 0.7530  | 1.0270  | 29.0480 | H | 0      | 0.6410  | -7.1040  | 11.3470 | C | 0 |
| -3.3560  | 6.2600  | 24.2340 | C | 0       | -0.6320 | 0.0950  | 29.7870 | H | 0      | 0.6220  | -6.6260  | 10.3780 | H | 0 |
| -2.3020  | 6.4040  | 23.9990 | H | 0       | 1.3180  | -0.4840 | 30.3790 | C | 0      | 1.7790  | -7.5180  | 10.0240 | C | 0 |
| -3.9070  | 6.0240  | 23.3240 | H | 0       | 1.3770  | 0.0790  | 31.3100 | H | 0      | 2.7090  | -7.4760  | 11.4750 | H | 0 |

|         |         |         |   |   |         |         |         |   |   |         |         |         |   |   |
|---------|---------|---------|---|---|---------|---------|---------|---|---|---------|---------|---------|---|---|
| 1.6280  | -7.8720 | 13.4120 | C | 0 | 1.9790  | -3.3470 | 13.9370 | H | 0 | 5.2340  | 0.0130  | 11.6350 | C | 0 |
| 2.4280  | -8.0850 | 14.1070 | H | 0 | 1.3200  | -4.8410 | 15.4030 | C | 0 | 5.9740  | 0.6070  | 11.1000 | H | 0 |
| 0.3240  | -7.7940 | 14.0140 | C | 0 | 0.6290  | -5.6830 | 15.3590 | H | 0 | 5.4820  | 0.0330  | 13.2100 | C | 0 |
| 0.1650  | -7.9150 | 15.0750 | H | 0 | 2.3540  | -5.1640 | 15.5240 | H | 0 | 6.4620  | -0.4140 | 13.3820 | H | 0 |
| -0.7640 | -7.3530 | 13.3580 | C | 0 | 1.0170  | -3.7130 | 16.4710 | C | 0 | 5.4310  | 1.4380  | 13.7020 | C | 0 |
| -4.3260 | -5.2860 | 15.3030 | C | 0 | 1.7090  | -2.8750 | 16.3920 | H | 0 | 6.3480  | 1.8810  | 13.3150 | H | 0 |
| -5.2800 | -5.9560 | 14.8940 | O | 0 | 0.0050  | -3.3090 | 16.4400 | H | 0 | 4.6410  | 1.9630  | 13.1650 | H | 0 |
| -4.5350 | -3.9850 | 15.5140 | N | 0 | 1.1530  | -4.4230 | 17.8060 | C | 0 | 5.3710  | 1.6160  | 14.7760 | H | 0 |
| -3.8020 | -3.5830 | 16.0810 | H | 0 | 0.2000  | -4.8590 | 18.1040 | H | 0 | 4.5880  | -0.7150 | 13.9440 | O | 0 |
| -5.7450 | -3.1580 | 15.3800 | C | 0 | 1.8610  | -5.2460 | 17.7140 | H | 0 | 3.6990  | -0.3690 | 13.8380 | H | 0 |
| -6.6310 | -3.7930 | 15.3780 | H | 0 | 1.5500  | -3.4590 | 18.8360 | N | 0 | 5.4570  | -1.4330 | 11.2840 | C | 0 |
| -5.9440 | -2.2890 | 16.6620 | C | 0 | 2.3250  | -2.9380 | 18.4520 | H | 0 | 6.5870  | -1.6980 | 10.9550 | O | 0 |
| -6.9150 | -1.7970 | 16.6170 | H | 0 | 0.8880  | -2.7000 | 18.9000 | H | 0 | 4.4480  | -2.2980 | 11.3450 | N | 0 |
| -5.9860 | -3.1350 | 17.9790 | C | 0 | 1.7880  | -3.8900 | 19.7180 | H | 0 | 3.6180  | -1.9680 | 11.8160 | H | 0 |
| -6.5450 | -4.0560 | 17.8140 | H | 0 | -0.8590 | -2.6330 | 14.0540 | C | 0 | 4.3960  | -3.7940 | 11.1480 | C | 0 |
| -4.9690 | -3.4560 | 18.2070 | H | 0 | -1.8510 | -2.8350 | 14.7940 | O | 0 | 3.3500  | -4.0390 | 11.3300 | H | 0 |
| -6.3480 | -2.5090 | 18.7940 | H | 0 | -0.4170 | -1.4370 | 13.6460 | N | 0 | 4.7720  | -4.0860 | 9.6610  | C | 0 |
| -4.8800 | -1.1690 | 16.7200 | C | 0 | 0.2970  | -1.4860 | 12.9340 | H | 0 | 5.7400  | -3.7350 | 9.3040  | H | 0 |
| -3.8520 | -1.5280 | 16.6780 | H | 0 | -0.7460 | -0.1420 | 14.3190 | C | 0 | 4.7830  | -5.1710 | 9.5520  | H | 0 |
| -5.0500 | -0.3320 | 13.2890 | H | 0 | -1.7210 | -0.2850 | 14.8750 | H | 0 | 3.8100  | -3.5190 | 8.6560  | C | 0 |
| -4.8740 | -0.6790 | 17.6940 | H | 0 | 0.2160  | -0.1010 | 15.4700 | C | 0 | 2.7930  | -3.5950 | 9.0420  | H | 0 |
| -5.8910 | -2.2800 | 14.0550 | C | 0 | -0.1290 | 0.8040  | 15.9690 | H | 0 | 3.9830  | -2.4460 | 8.5650  | H | 0 |
| -6.9360 | -1.8050 | 13.6940 | O | 0 | 0.0020  | -0.9720 | 16.0890 | H | 0 | 3.9730  | -4.1460 | 7.2810  | C | 0 |
| -4.7890 | -2.3280 | 13.2890 | N | 0 | 1.7590  | 0.1050  | 15.1760 | C | 0 | 3.2030  | -3.7650 | 6.6110  | H | 0 |
| -3.9520 | -2.7910 | 13.6140 | H | 0 | 2.2110  | 0.4890  | 14.1190 | O | 0 | 4.9440  | -3.7630 | 6.9670  | H | 0 |
| -4.6720 | -1.8850 | 11.8580 | C | 0 | 2.5580  | -0.3680 | 16.0780 | N | 0 | 3.8340  | -5.5770 | 7.3580  | N | 0 |
| -5.6920 | -1.7930 | 11.4850 | H | 0 | 3.5410  | -0.5630 | 15.9540 | H | 0 | 4.7030  | -6.0690 | 7.2080  | H | 0 |
| -3.9960 | -0.5130 | 11.7430 | C | 0 | 2.2780  | -0.6400 | 17.0100 | H | 0 | 2.7300  | -6.2720 | 7.5220  | C | 0 |
| -4.4420 | 0.0890  | 12.5340 | H | 0 | -0.7810 | 0.9870  | 13.3800 | C | 0 | 1.5900  | -5.6530 | 7.6590  | N | 0 |
| -2.9530 | -0.5870 | 12.0530 | H | 0 | -0.1590 | 0.9400  | 12.2950 | O | 0 | 1.5980  | -4.6560 | 7.4980  | H | 0 |
| -4.0020 | 0.2380  | 10.4400 | C | 0 | -1.4340 | 2.0720  | 13.6450 | N | 0 | 0.6780  | -6.0830 | 7.6110  | H | 0 |
| -5.0370 | 0.1580  | 10.1080 | H | 0 | -1.8800 | 2.1080  | 14.5500 | H | 0 | 2.7170  | -7.5140 | 7.4300  | N | 0 |
| -3.7160 | 1.2600  | 10.6870 | H | 0 | -1.8080 | 3.1860  | 12.6840 | C | 0 | 3.4280  | -7.9810 | 6.8870  | H | 0 |
| -2.8060 | -0.2510 | 9.1600  | S | 0 | -2.1640 | 2.6510  | 11.8040 | H | 0 | 1.9100  | -8.0370 | 7.7380  | H | 0 |
| -3.2190 | 0.8940  | 7.8640  | C | 0 | -3.0290 | 3.8970  | 13.3420 | C | 0 | 5.2000  | -4.6260 | 12.1400 | C | 0 |
| -3.4380 | 1.8570  | 8.3250  | H | 0 | -2.7800 | 4.2370  | 14.3480 | H | 0 | 5.1690  | -5.8990 | 12.0510 | O | 0 |
| -2.4470 | 0.9520  | 7.0970  | H | 0 | -3.2480 | 4.8660  | 12.8940 | H | 0 | 6.0110  | -3.9660 | 12.9570 | N | 0 |
| -4.0650 | 0.4900  | 7.3070  | H | 0 | -4.3870 | 3.1890  | 13.2650 | C | 0 | 6.0500  | -2.9730 | 12.7740 | H | 0 |
| -3.9310 | -3.0430 | 11.1900 | C | 0 | -5.0530 | 3.0270  | 12.0280 | C | 0 | 6.6810  | -4.5860 | 14.0900 | C | 0 |
| -3.1890 | -3.7280 | 11.8990 | O | 0 | -4.6260 | 3.5000  | 11.1560 | H | 0 | 7.2160  | -5.4630 | 13.7230 | H | 0 |
| -4.0600 | -3.3030 | 9.8210  | N | 0 | -6.3510 | 2.4660  | 12.0610 | C | 0 | 7.6310  | -3.5700 | 14.7250 | C | 0 |
| -4.7680 | -2.8830 | 9.2360  | H | 0 | -6.8830 | 2.3580  | 11.1270 | H | 0 | 8.2920  | -3.1570 | 13.9640 | H | 0 |
| -3.3570 | -4.3340 | 9.0210  | C | 0 | -6.9360 | 1.9850  | 13.2400 | C | 0 | 6.9990  | -2.7390 | 15.0400 | H | 0 |
| -3.6800 | -5.3010 | 9.4060  | H | 0 | -8.1550 | 1.4400  | 13.2600 | O | 0 | 8.4220  | -4.0970 | 15.9490 | C | 0 |
| -3.7040 | -4.1950 | 7.5120  | C | 0 | -8.5690 | 1.4060  | 14.1250 | H | 0 | 9.4120  | -5.1350 | 15.8280 | C | 0 |
| -3.3280 | -3.2110 | 7.2310  | H | 0 | -6.2020 | 2.0870  | 14.4540 | C | 0 | 9.4970  | -5.5730 | 14.8440 | H | 0 |
| -3.1260 | -4.9200 | 6.9400  | H | 0 | -6.7100 | 1.6630  | 15.3080 | H | 0 | 10.2280 | -5.4640 | 16.9200 | C | 0 |
| -5.2920 | -4.3210 | 7.2670  | C | 0 | -4.9200 | 2.6820  | 14.4930 | C | 0 | 10.9910 | -6.2280 | 16.9310 | H | 0 |
| -5.8040 | -3.9380 | 8.1500  | H | 0 | -4.3100 | 2.6890  | 15.3840 | H | 0 | 9.9250  | -4.8810 | 18.1340 | C | 0 |
| -5.7010 | -3.7020 | 6.4700  | H | 0 | -0.6050 | 4.0910  | 12.2750 | C | 0 | 10.7150 | -5.3100 | 19.1870 | O | 0 |
| -5.8170 | -5.7350 | 6.9520  | C | 0 | -0.8010 | 4.8590  | 11.3570 | O | 0 | 10.3630 | -5.1550 | 20.0670 | H | 0 |
| -5.3410 | -6.4400 | 6.0550  | O | 0 | 0.5270  | 3.9810  | 13.0040 | N | 0 | 8.8950  | -3.9420 | 18.2860 | C | 0 |
| -6.8920 | -6.1720 | 7.6130  | N | 0 | 0.4660  | 3.3450  | 13.7870 | H | 0 | 8.6550  | -3.4110 | 19.1950 | H | 0 |
| -7.2270 | -7.1050 | 7.4220  | H | 0 | 1.8190  | 4.3500  | 12.5330 | C | 0 | 8.1390  | -3.6060 | 17.1840 | C | 0 |
| -7.2610 | -5.5250 | 8.2950  | H | 0 | 1.7920  | 5.3850  | 12.1920 | H | 0 | 7.4170  | -2.8050 | 17.2420 | H | 0 |
| -1.8660 | -4.2390 | 9.1370  | C | 0 | 2.7560  | 4.3940  | 13.7040 | C | 0 | 5.7090  | -5.1290 | 15.1240 | C | 0 |
| -1.2680 | -5.3290 | 9.1120  | O | 0 | 3.6870  | 4.7890  | 13.2970 | H | 0 | 4.5910  | -4.6340 | 15.2230 | O | 0 |
| -1.2670 | -3.0930 | 9.4590  | N | 0 | 2.4180  | 5.2740  | 14.2510 | H | 0 | 6.1640  | -6.0490 | 15.9650 | N | 0 |
| -1.8540 | -2.2800 | 9.5830  | H | 0 | 2.9020  | 3.4820  | 14.2820 | H | 0 | 7.0690  | -6.4850 | 15.8620 | H | 0 |
| 0.1770  | -2.9840 | 9.7460  | C | 0 | 2.4510  | 3.4760  | 11.3680 | C | 0 | 5.5090  | -6.3490 | 17.1990 | C | 0 |
| 0.5760  | -3.8560 | 9.2290  | H | 0 | 3.5850  | 3.6400  | 10.8750 | O | 0 | 5.0670  | -5.4220 | 17.5630 | H | 0 |
| 0.6350  | -1.7570 | 8.8870  | C | 0 | 1.7190  | 2.4060  | 10.8900 | N | 0 | 4.3350  | -7.3110 | 17.0070 | C | 0 |
| -0.0960 | -1.0310 | 9.2430  | H | 0 | 0.8010  | 2.2440  | 11.2800 | H | 0 | 3.7910  | -6.7830 | 16.2250 | H | 0 |
| 1.6620  | -1.4270 | 9.0400  | H | 0 | 1.9930  | 1.3450  | 9.8800  | C | 0 | 4.8630  | -8.2320 | 16.7600 | H | 0 |
| 0.3800  | -1.9230 | 7.4060  | C | 0 | 1.3400  | 0.4720  | 9.9130  | H | 0 | 3.4930  | -7.4720 | 18.2100 | O | 0 |
| 0.4430  | -2.9950 | 6.9210  | O | 0 | 1.9120  | 2.0570  | 8.3810  | C | 0 | 2.8400  | -8.1220 | 17.9410 | H | 0 |
| -0.0740 | -0.8780 | 6.7070  | N | 0 | 2.6460  | 2.8620  | 8.3510  | H | 0 | 6.4630  | -6.8470 | 18.2480 | C | 0 |
| -0.5120 | -1.0450 | 5.8120  | H | 0 | 2.2920  | 1.4400  | 7.5670  | H | 0 | 7.4590  | -7.5700 | 18.0900 | O | 0 |
| -0.0570 | 0.0860  | 7.0050  | H | 0 | 0.5360  | 2.5170  | 8.0750  | C | 0 | 6.1380  | -6.5300 | 19.5340 | N | 0 |
| 0.5570  | -3.0380 | 11.2030 | C | 0 | -0.4230 | 2.2440  | 8.7950  | O | 0 | 5.3930  | -5.8710 | 19.7110 | H | 0 |
| 1.4810  | -2.3510 | 11.6120 | O | 0 | 0.3780  | 3.0480  | 6.8910  | N | 0 | 7.0350  | -6.6620 | 20.7240 | C | 0 |
| -0.1430 | -3.7350 | 12.0420 | N | 0 | -0.5150 | 3.4790  | 6.6980  | H | 0 | 8.0270  | -6.6790 | 20.2730 | H | 0 |
| -0.9110 | -4.2580 | 11.6490 | H | 0 | 1.1990  | 3.2870  | 6.3530  | H | 0 | 6.8810  | -5.4840 | 21.6720 | C | 0 |
| -0.1010 | -3.7970 | 13.4700 | C | 0 | 3.4140  | 0.6430  | 10.0390 | C | 0 | 6.8510  | -4.5560 | 21.1000 | H | 0 |
| -0.7510 | -4.6500 | 13.6610 | H | 0 | 4.0730  | 0.2570  | 9.0610  | O | 0 | 5.8870  | -5.5400 | 22.1160 | H | 0 |
| 1.2990  | -4.1970 | 13.9960 | C | 0 | 3.8440  | 0.4750  | 11.2950 | N | 0 | 7.7890  | -5.3580 | 22.8410 | C | 0 |
| 1.7530  | -4.9360 | 13.3350 | H | 0 | 3.1720  | 0.7730  | 11.9870 | H | 0 | 7.7850  | -4.3420 | 23.2370 | H | 0 |

|         |          |         |   |   |         |          |         |   |   |         |          |         |   |   |
|---------|----------|---------|---|---|---------|----------|---------|---|---|---------|----------|---------|---|---|
| 7.3980  | -5.9670  | 23.6550 | H | 0 | 12.1700 | -16.3250 | 17.2150 | C | 0 | 10.3060 | -23.0180 | 12.9440 | O | 0 |
| 9.2850  | -5.5410  | 22.4730 | C | 0 | 11.8940 | -15.3430 | 16.8310 | H | 0 | 12.4450 | -23.1750 | 13.6050 | N | 0 |
| 10.0390 | -6.4390  | 22.9870 | O | 0 | 12.6660 | -16.0360 | 18.6520 | C | 0 | 13.2140 | -22.8080 | 14.1470 | H | 0 |
| 9.7820  | -4.8450  | 21.5960 | O | 0 | 13.6890 | -15.6730 | 18.5540 | H | 0 | 12.6390 | -24.5500 | 13.0950 | C | 0 |
| 6.8350  | -8.0270  | 21.3610 | C | 0 | 12.0160 | -15.3330 | 19.1720 | H | 0 | 12.8590 | -24.6260 | 12.0300 | H | 0 |
| 6.5810  | -8.1520  | 22.5570 | O | 0 | 12.8290 | -17.3020 | 19.4510 | C | 0 | 13.9510 | -24.8990 | 13.8060 | C | 0 |
| 7.0390  | -9.0590  | 20.5640 | N | 0 | 13.8180 | -17.9800 | 19.2610 | O | 0 | 14.1810 | -25.9620 | 13.7440 | H | 0 |
| 7.2750  | -8.8580  | 19.6030 | H | 0 | 11.9180 | -17.5950 | 20.3670 | N | 0 | 14.8170 | -24.4160 | 13.3530 | H | 0 |
| 6.8960  | -10.4190 | 20.9630 | C | 0 | 11.7760 | -18.4830 | 20.8270 | H | 0 | 13.9140 | -24.6530 | 15.2570 | O | 0 |
| 6.6650  | -10.5000 | 22.0250 | H | 0 | 11.2120 | -16.8950 | 20.5470 | H | 0 | 14.3660 | -25.3930 | 15.6690 | H | 0 |
| 5.7330  | -10.8990 | 20.1780 | C | 0 | 13.2390 | -17.0280 | 16.3940 | C | 0 | 11.5830 | -25.5500 | 13.5970 | C | 0 |
| 6.0810  | -10.9080 | 19.1450 | H | 0 | 13.0860 | -18.1450 | 16.0110 | O | 0 | 11.3960 | -26.5520 | 12.9140 | O | 0 |
| 5.6030  | -11.9180 | 20.5430 | H | 0 | 14.4680 | -16.4370 | 16.1690 | N | 0 | 10.9610 | -25.2880 | 14.7280 | N | 0 |
| 4.4030  | -10.1490 | 20.4420 | C | 0 | 14.7380 | -15.5650 | 16.5990 | H | 0 | 11.0830 | -24.3460 | 15.0730 | H | 0 |
| 4.4300  | -9.0650  | 20.3330 | H | 0 | 15.5360 | -17.1460 | 15.3590 | C | 0 | 10.0040 | -26.1390 | 15.4410 | C | 0 |
| 3.4560  | -10.6300 | 19.4490 | C | 0 | 15.0070 | -17.4500 | 14.4560 | H | 0 | 10.1390 | -27.1340 | 15.0170 | H | 0 |
| 3.7310  | -10.5360 | 18.3990 | H | 0 | 16.7190 | -16.1200 | 15.1080 | C | 0 | 10.2810 | -26.0510 | 16.9450 | C | 0 |
| 3.2230  | -11.6550 | 19.7350 | H | 0 | 17.5520 | -16.6830 | 14.6870 | H | 0 | 9.9540  | -25.0580 | 17.2510 | H | 0 |
| 2.4880  | -10.1820 | 19.6750 | H | 0 | 16.3230 | -14.9330 | 14.2220 | C | 0 | 9.8000  | -26.9770 | 17.2600 | H | 0 |
| 3.8380  | -10.4450 | 21.8610 | C | 0 | 15.4630 | -14.4460 | 14.6810 | H | 0 | 11.8120 | -26.2130 | 17.3280 | C | 0 |
| 3.9870  | -11.4940 | 22.1180 | H | 0 | 17.1520 | -14.2270 | 14.2830 | H | 0 | 12.3030 | -26.8700 | 16.6100 | H | 0 |
| 4.4870  | -9.9260  | 22.5670 | H | 0 | 16.0040 | -15.2660 | 13.2350 | H | 0 | 12.3690 | -25.2770 | 17.2810 | H | 0 |
| 2.8540  | -10.0710 | 22.1450 | H | 0 | 17.1770 | -15.7090 | 16.3920 | O | 0 | 12.0390 | -26.7870 | 18.7440 | C | 0 |
| 8.1270  | -11.2870 | 20.6860 | C | 0 | 17.8500 | -16.3180 | 16.7060 | H | 0 | 11.7920 | -27.8480 | 17.7380 | H | 0 |
| 8.9310  | -11.0470 | 19.7690 | O | 0 | 16.1360 | -18.4470 | 15.9360 | C | 0 | 13.0960 | -26.5540 | 18.8720 | H | 0 |
| 8.3140  | -12.2830 | 21.5350 | N | 0 | 17.0290 | -19.0200 | 15.1970 | O | 0 | 11.3380 | -26.0600 | 19.7710 | N | 0 |
| 7.6270  | -12.3540 | 22.2730 | H | 0 | 15.8740 | -18.8910 | 17.1400 | N | 0 | 11.7410 | -25.1890 | 20.0860 | H | 0 |
| 9.5590  | -13.0880 | 21.6480 | C | 0 | 15.1920 | -18.2990 | 17.5930 | H | 0 | 10.1840 | -26.4050 | 20.3050 | C | 0 |
| 10.3350 | -12.7070 | 20.9840 | H | 0 | 16.3220 | -20.1640 | 17.7180 | C | 0 | 9.4380  | -27.2800 | 19.8020 | N | 0 |
| 10.1450 | -12.7640 | 23.0790 | C | 0 | 17.2460 | -20.5220 | 17.2640 | H | 0 | 9.8630  | -27.9080 | 19.1350 | H | 0 |
| 9.3970  | -12.7070 | 23.8690 | H | 0 | 16.6180 | -19.8110 | 19.2030 | C | 0 | 8.5760  | -27.5770 | 20.2370 | H | 0 |
| 10.8010 | -13.6040 | 23.3090 | H | 0 | 15.6990 | -19.5310 | 19.7180 | H | 0 | 9.7820  | -25.7770 | 21.3310 | N | 0 |
| 10.9000 | -11.4360 | 23.1600 | C | 0 | 17.0370 | -20.6750 | 19.7170 | H | 0 | 10.3270 | -25.0110 | 21.7000 | H | 0 |
| 11.8380 | -11.2160 | 22.4820 | O | 0 | 17.5710 | -18.5970 | 19.4720 | C | 0 | 8.8090  | -25.9180 | 21.5630 | H | 0 |
| 10.4640 | -10.5670 | 24.0510 | N | 0 | 18.4610 | -18.7100 | 18.8520 | H | 0 | 8.5390  | -25.8730 | 14.9960 | C | 0 |
| 10.8290 | -9.6260  | 24.0160 | H | 0 | 17.0410 | -17.6660 | 19.2730 | H | 0 | 7.7260  | -26.7290 | 15.2630 | O | 0 |
| 9.7440  | -10.8990 | 24.6770 | H | 0 | 17.8460 | -18.5630 | 21.0400 | C | 0 | 8.3380  | -24.7490 | 14.2810 | N | 0 |
| 9.3070  | -14.6120 | 21.4290 | C | 0 | 18.0610 | -17.5250 | 21.2960 | H | 0 | 9.1790  | -24.3110 | 13.9350 | H | 0 |
| 10.2550 | -15.3230 | 21.1570 | O | 0 | 16.9280 | -18.8230 | 21.5670 | H | 0 | 7.0190  | -24.2120 | 13.8930 | C | 0 |
| 8.0900  | -15.0890 | 21.6310 | N | 0 | 18.9790 | -19.4600 | 21.5390 | C | 0 | 6.4260  | -23.9480 | 14.7690 | H | 0 |
| 7.3570  | -14.3970 | 21.6950 | H | 0 | 18.9090 | -19.5450 | 22.6240 | H | 0 | 7.0360  | -22.8730 | 13.0640 | C | 0 |
| 7.8960  | -16.5070 | 21.8370 | C | 0 | 18.8080 | -20.4920 | 21.2350 | H | 0 | 7.9020  | -22.3190 | 13.4260 | H | 0 |
| 8.6170  | -16.8120 | 22.5960 | H | 0 | 20.2850 | -19.0910 | 20.8950 | N | 0 | 7.1920  | -23.1080 | 12.0110 | H | 0 |
| 6.5140  | -16.9470 | 22.3500 | C | 0 | 20.5690 | -18.1760 | 21.2140 | H | 0 | 5.7730  | -22.0190 | 13.1370 | C | 0 |
| 5.8620  | -17.0900 | 21.4880 | H | 0 | 21.0230 | -19.7300 | 21.1520 | H | 0 | 4.8480  | -22.5940 | 13.1850 | H | 0 |
| 6.7100  | -17.8980 | 22.8440 | H | 0 | 20.3900 | -19.1340 | 19.8910 | H | 0 | 5.7730  | -21.0770 | 14.3530 | C | 0 |
| 5.7590  | -16.0610 | 23.3720 | C | 0 | 15.2650 | -21.2730 | 17.7600 | C | 0 | 4.7590  | -20.6830 | 14.4250 | H | 0 |
| 6.3450  | -15.9680 | 24.2860 | H | 0 | 15.7170 | -22.3800 | 17.7210 | O | 0 | 5.9670  | -21.6300 | 15.2710 | H | 0 |
| 5.5380  | -15.0750 | 22.9630 | H | 0 | 13.9080 | -21.0150 | 17.8160 | N | 0 | 6.5460  | -20.3300 | 14.1730 | H | 0 |
| 4.4940  | -16.8330 | 23.8450 | C | 0 | 13.5660 | -20.0780 | 17.9740 | H | 0 | 5.8050  | -21.1090 | 11.8300 | C | 0 |
| 4.0290  | -17.9020 | 23.3710 | O | 0 | 12.8600 | -22.0550 | 17.7620 | C | 0 | 4.9300  | -20.4590 | 11.8180 | H | 0 |
| 3.7610  | -16.2620 | 24.7490 | N | 0 | 13.3080 | -23.0480 | 17.8090 | H | 0 | 6.7620  | -20.5870 | 11.8320 | H | 0 |
| 2.9340  | -16.7220 | 25.1010 | H | 0 | 11.9780 | -22.0180 | 19.1040 | C | 0 | 5.7700  | -21.6970 | 10.9130 | H | 0 |
| 4.0810  | -15.4220 | 25.2080 | H | 0 | 11.3310 | -22.8930 | 19.0450 | H | 0 | 6.1770  | -25.2690 | 13.2020 | C | 0 |
| 8.2720  | -17.4130 | 20.5600 | C | 0 | 12.6080 | -21.9800 | 19.9930 | H | 0 | 6.5860  | -25.7930 | 12.1660 | O | 0 |
| 8.7060  | -18.5870 | 20.7170 | O | 0 | 11.1820 | -20.7210 | 19.2180 | C | 0 | 4.8490  | -25.4390 | 13.5800 | N | 0 |
| 8.1030  | -16.8730 | 19.3760 | N | 0 | 11.0490 | -19.8850 | 18.2820 | O | 0 | 4.5240  | -24.8180 | 14.3070 | H | 0 |
| 7.6990  | -15.9480 | 19.4050 | H | 0 | 10.6550 | -20.4870 | 20.3810 | N | 0 | 3.8560  | -26.2560 | 12.7700 | C | 0 |
| 8.5990  | -17.3640 | 18.0820 | C | 0 | 10.1110 | -19.6380 | 20.3370 | H | 0 | 4.3430  | -26.6500 | 11.8770 | H | 0 |
| 8.9960  | -18.3750 | 18.1700 | H | 0 | 10.6380 | -21.1750 | 21.1210 | H | 0 | 3.3010  | -27.4500 | 13.6270 | C | 0 |
| 7.4200  | -17.5410 | 17.1500 | C | 0 | 12.0250 | -22.1050 | 16.4740 | C | 0 | 2.5950  | -28.0360 | 13.0400 | H | 0 |
| 7.0510  | -16.5240 | 17.0220 | H | 0 | 11.2060 | -23.0170 | 16.3920 | O | 0 | 4.1750  | -28.0700 | 13.8240 | H | 0 |
| 7.8480  | -18.1150 | 15.7340 | C | 0 | 12.0560 | -21.2300 | 15.5040 | N | 0 | 2.6440  | -27.0130 | 14.8750 | C | 0 |
| 8.0740  | -19.1730 | 15.8700 | H | 0 | 12.6090 | -20.4120 | 15.7200 | H | 0 | 3.3250  | -26.2780 | 15.3050 | H | 0 |
| 7.1830  | -18.1450 | 14.8700 | H | 0 | 11.2030 | -21.2570 | 14.3410 | C | 0 | 1.7640  | -26.4020 | 14.6750 | H | 0 |
| 8.7620  | -17.6010 | 15.4370 | H | 0 | 10.1640 | -21.2320 | 14.6700 | H | 0 | 2.2550  | -28.0400 | 15.8750 | C | 0 |
| 6.2690  | -18.4100 | 17.6970 | C | 0 | 11.3670 | -19.9970 | 13.4360 | C | 0 | 1.4030  | -28.6460 | 15.5630 | H | 0 |
| 6.6530  | -19.4180 | 17.8510 | H | 0 | 11.2730 | -19.0740 | 14.0070 | H | 0 | 3.0580  | -28.7740 | 15.9480 | H | 0 |
| 5.9240  | -18.1040 | 18.6840 | H | 0 | 12.7570 | -19.8260 | 12.7770 | C | 0 | 2.0050  | -27.2980 | 17.1540 | N | 0 |
| 5.0270  | -18.5210 | 16.7420 | C | 0 | 13.0290 | -20.6800 | 12.1570 | H | 0 | 2.8170  | -27.1350 | 17.7320 | H | 0 |
| 4.3200  | -19.2330 | 17.1680 | H | 0 | 12.9220 | -18.9460 | 12.1540 | H | 0 | 0.8280  | -26.9210 | 17.6740 | C | 0 |
| 4.6350  | -17.5080 | 16.6490 | H | 0 | 13.4460 | -19.7320 | 13.6160 | H | 0 | -0.3160 | -27.2860 | 17.1660 | N | 0 |
| 5.3380  | -18.9350 | 15.7830 | H | 0 | 10.2760 | -19.8810 | 12.3470 | C | 0 | -0.3290 | -27.8050 | 16.2990 | H | 0 |
| 9.7020  | -16.5020 | 17.4720 | C | 0 | 10.2860 | -18.9340 | 11.8080 | H | 0 | -1.0880 | -26.7300 | 17.5040 | H | 0 |
| 9.4530  | -15.3110 | 17.3000 | O | 0 | 10.4280 | -20.6490 | 11.5880 | H | 0 | 0.8040  | -26.1700 | 18.7760 | N | 0 |
| 10.9290 | -17.0800 | 17.2870 | N | 0 | 9.2980  | -20.0880 | 12.7800 | H | 0 | 1.6980  | -25.7780 | 19.0360 | H | 0 |
| 11.0210 | -18.0710 | 17.4560 | H | 0 | 11.3050 | -22.5480 | 13.4520 | C | 0 | -0.0480 | -25.9100 | 19.2520 | H | 0 |

|          |          |         |   |   |          |          |         |   |   |          |          |          |   |   |
|----------|----------|---------|---|---|----------|----------|---------|---|---|----------|----------|----------|---|---|
| 2.6380   | -25.4020 | 12.3640 | C | 0 | -14.8620 | -20.2340 | 7.8610  | H | 0 | -8.1530  | -14.3120 | -7.9990  | C | 0 |
| 2.4280   | -24.3110 | 12.8860 | O | 0 | -13.9360 | -18.2650 | 7.6400  | C | 0 | -9.0240  | -13.7540 | -7.6550  | H | 0 |
| 1.9300   | -25.8510 | 11.3090 | N | 0 | -14.8010 | -17.6770 | 7.3710  | H | 0 | -7.3180  | -13.6120 | -8.0160  | H | 0 |
| 2.2420   | -26.7010 | 10.8630 | H | 0 | -12.6710 | -17.6210 | 7.6060  | C | 0 | -8.3960  | -14.7720 | -9.4390  | C | 0 |
| 0.5790   | -25.4230 | 11.1330 | C | 0 | -12.5760 | -16.6040 | 7.2540  | H | 0 | -7.4990  | -15.2210 | -9.8670  | H | 0 |
| 0.5380   | -24.3410 | 11.0090 | H | 0 | -11.5120 | -18.3400 | 7.9570  | C | 0 | -9.2690  | -15.4170 | -9.5350  | H | 0 |
| 0.0750   | -26.0090 | 9.8130  | C | 0 | -10.5930 | -17.8040 | 7.7720  | H | 0 | -8.6260  | -13.6470 | -10.2600 | N | 0 |
| 0.7400   | -25.7430 | 8.9910  | H | 0 | -9.8730  | -20.6820 | 5.9200  | C | 0 | -8.2180  | -12.7730 | -9.9600  | H | 0 |
| 0.0100   | -27.0860 | 9.9650  | H | 0 | -8.8430  | -20.3050 | 5.3810  | O | 0 | -9.4410  | -13.5850 | -11.3480 | C | 0 |
| -1.2930  | -25.5170 | 9.4020  | C | 0 | -11.0210 | -20.5360 | 5.4040  | N | 0 | -10.1090 | -14.6040 | -11.8420 | N | 0 |
| -1.9070  | -25.4330 | 10.2990 | H | 0 | -11.8070 | -20.7190 | 6.0110  | H | 0 | -9.8450  | -15.5240 | -11.5210 | H | 0 |
| -1.1600  | -24.1690 | 8.6940  | C | 0 | -11.2160 | -19.7450 | 4.1590  | C | 0 | -10.9710 | -14.4450 | -12.3430 | H | 0 |
| -0.8950  | -24.3180 | 7.6480  | H | 0 | -10.3990 | -19.0290 | 4.0640  | H | 0 | -9.5760  | -12.4180 | -11.8680 | N | 0 |
| -2.1320  | -23.6850 | 8.7790  | H | 0 | -11.2750 | -20.6630 | 2.9820  | C | 0 | -9.1770  | -11.5870 | -11.4570 | H | 0 |
| -0.4290  | -23.5460 | 9.2110  | H | 0 | -10.3400 | -21.2120 | 2.8750  | H | 0 | -10.3850 | -12.2200 | -12.4390 | H | 0 |
| -2.0900  | -26.3920 | 8.4590  | C | 0 | -12.0270 | -21.4140 | 3.2240  | H | 0 | -8.1740  | -13.7540 | -5.2330  | C | 0 |
| -2.0880  | -27.3520 | 8.9750  | H | 0 | -11.6670 | -19.9340 | 1.8250  | O | 0 | -9.1680  | -13.4360 | -4.6100  | O | 0 |
| -3.1390  | -26.1500 | 8.2910  | H | 0 | -10.9160 | -19.3930 | 1.5700  | H | 0 | -7.1730  | -12.8410 | -5.3640  | N | 0 |
| -1.5820  | -26.4660 | 7.4970  | H | 0 | -12.5660 | -18.9200 | 4.2400  | C | 0 | -6.2940  | -13.1730 | -5.7360  | H | 0 |
| -0.3210  | -25.8630 | 12.2550 | C | 0 | -13.6260 | -19.4360 | 4.6170  | O | 0 | -7.2300  | -11.4370 | -4.8970  | C | 0 |
| -0.3620  | -27.0720 | 12.6670 | O | 0 | -12.5030 | -17.6900 | 3.8270  | N | 0 | -6.4300  | -10.8930 | -5.3990  | H | 0 |
| -0.9610  | -24.8090 | 12.8060 | N | 0 | -11.6800 | -17.2670 | 3.4230  | H | 0 | -8.1660  | -10.9650 | -5.1960  | H | 0 |
| -0.8530  | -23.9000 | 12.3780 | H | 0 | -13.7070 | -16.9330 | 3.6040  | C | 0 | -7.1200  | -11.3070 | -3.3480  | C | 0 |
| -1.9820  | -24.9190 | 13.7930 | C | 0 | -14.3110 | -16.7890 | 4.4990  | H | 0 | -7.5980  | -10.3270 | -2.8560  | O | 0 |
| -1.6200  | -25.7700 | 14.3710 | H | 0 | -13.2610 | -15.4630 | 3.1380  | C | 0 | -6.5110  | -12.3030 | -2.6670  | N | 0 |
| -1.9810  | -23.6770 | 14.6140 | C | 0 | -14.1740 | -14.9690 | 2.8050  | H | 0 | -5.9610  | -12.9670 | -3.1930  | H | 0 |
| -1.1360  | -23.6840 | 15.3020 | H | 0 | -12.6750 | -14.6990 | 4.3060  | C | 0 | -6.6050  | -12.5200 | -1.2450  | C | 0 |
| -1.8520  | -22.7940 | 13.9870 | H | 0 | -12.7130 | -13.6190 | 4.1660  | H | 0 | -7.6060  | -12.2510 | -0.9090  | H | 0 |
| -2.9030  | -23.6080 | 15.1910 | H | 0 | -13.3330 | -14.8520 | 5.1620  | H | 0 | -6.5000  | -13.9620 | -0.9000  | C | 0 |
| -3.3550  | -25.1800 | 13.2260 | C | 0 | -11.7290 | -15.1260 | 4.6380  | H | 0 | -7.3350  | -14.4640 | -1.3890  | H | 0 |
| -3.8670  | -26.2460 | 13.3920 | O | 0 | -12.2460 | -15.5880 | 2.1490  | O | 0 | -5.5800  | -14.4320 | -1.2460  | H | 0 |
| -3.9170  | -24.3110 | 12.4320 | N | 0 | -11.6650 | -14.8250 | 2.1110  | H | 0 | -6.6820  | -14.2910 | 0.6150   | C | 0 |
| -3.4470  | -23.4370 | 12.2440 | H | 0 | -14.6630 | -17.4550 | 2.4280  | C | 0 | -7.5330  | -13.5820 | 1.4110   | N | 0 |
| -5.1680  | -24.5360 | 11.6650 | C | 0 | -15.8040 | -17.0990 | 2.3750  | O | 0 | -7.5660  | -14.2570 | 2.5800   | C | 0 |
| -5.1910  | -25.5250 | 11.2070 | H | 0 | -14.1140 | -18.2640 | 1.5260  | N | 0 | -7.9590  | -13.9210 | 3.5280   | H | 0 |
| -6.3590  | -24.3330 | 12.6400 | C | 0 | -13.1170 | -18.4250 | 1.5190  | H | 0 | -6.8590  | -15.3570 | 2.4380   | N | 0 |
| -7.2800  | -24.2780 | 12.0610 | H | 0 | -14.7390 | -18.9450 | 0.4190  | C | 0 | -6.8010  | -15.9840 | 3.2280   | H | 0 |
| -6.4250  | -25.1520 | 13.3560 | H | 0 | -14.0960 | -19.7900 | 0.1690  | H | 0 | -6.3430  | -15.4570 | 1.2230   | C | 0 |
| -6.2560  | -23.0420 | 13.3860 | C | 0 | -15.7260 | -19.2990 | 0.7160  | H | 0 | -5.7350  | -16.2170 | 0.7550   | H | 0 |
| -5.6380  | -22.8710 | 14.5840 | C | 0 | -14.7360 | -18.1280 | -0.9210 | C | 0 | -5.6570  | -11.5420 | -0.5030  | C | 0 |
| -5.2230  | -23.6900 | 15.1520 | H | 0 | -15.1220 | -18.7060 | -1.9460 | O | 0 | -4.7750  | -11.9720 | 0.2240   | O | 0 |
| -5.8640  | -21.5210 | 14.9950 | N | 0 | -14.1870 | -16.9390 | -0.8430 | N | 0 | -5.6840  | -10.3040 | -0.8650  | N | 0 |
| -5.5350  | -21.1460 | 15.8730 | H | 0 | -14.1370 | -16.4390 | 0.0330  | H | 0 | -6.5050  | -10.1180 | -1.4230  | H | 0 |
| -6.5370  | -20.7960 | 14.0320 | C | 0 | -13.5040 | -16.2090 | -1.9210 | C | 0 | -4.9380  | -9.1630  | -0.3810  | C | 0 |
| -7.0740  | -19.4970 | 14.0070 | C | 0 | -14.1580 | -16.2100 | -2.7930 | H | 0 | -3.8920  | -9.4630  | -0.4400  | H | 0 |
| -7.0840  | -18.8860 | 14.8970 | H | 0 | -13.2420 | -14.7400 | -1.5750 | C | 0 | -5.1650  | -7.9520  | -1.2110  | C | 0 |
| -7.6220  | -19.0510 | 12.8050 | C | 0 | -12.8880 | -14.1640 | -2.4300 | H | 0 | -4.9880  | -8.1930  | -2.2590  | H | 0 |
| -8.1690  | -18.1220 | 12.8720 | H | 0 | -14.2110 | -14.3180 | -1.3090 | H | 0 | -6.2500  | -7.8510  | -1.2000  | H | 0 |
| -7.7350  | -19.9000 | 11.6750 | C | 0 | -12.6000 | -14.5930 | -0.7060 | H | 0 | -4.4880  | -6.6450  | -0.8490  | C | 0 |
| -8.1780  | -19.5030 | 10.7730 | H | 0 | -12.3210 | -16.9670 | -2.4610 | C | 0 | -4.9100  | -5.8490  | -1.4630  | H | 0 |
| -7.3660  | -21.2970 | 11.8230 | C | 0 | -11.5950 | -17.5610 | -1.6720 | O | 0 | -4.7360  | -6.3180  | 0.1610   | H | 0 |
| -7.5330  | -22.0280 | 11.0450 | H | 0 | -12.0810 | -16.9040 | -3.7490 | N | 0 | -2.9960  | -6.7200  | -0.9120  | C | 0 |
| -6.7630  | -21.7210 | 12.9450 | C | 0 | -12.8070 | -16.4670 | -4.2980 | H | 0 | -2.3510  | -7.0930  | 0.1440   | O | 0 |
| -5.1380  | -23.5860 | 10.4600 | C | 0 | -10.8960 | -17.4180 | -4.4740 | C | 0 | -2.4460  | -6.3460  | -1.9980  | O | 0 |
| -4.3510  | -22.6460 | 10.2850 | O | 0 | -10.1220 | -17.8540 | -3.8430 | H | 0 | -5.3230  | -8.7820  | 1.0910   | C | 0 |
| -6.0700  | -23.8180 | 9.5010  | N | 0 | -11.4050 | -18.3820 | -5.5340 | C | 0 | -6.3910  | -9.0620  | 1.5130   | O | 0 |
| -6.7220  | -24.5800 | 9.6160  | H | 0 | -12.2210 | -17.9490 | -6.1120 | H | 0 | -4.4150  | -8.1740  | 1.8910   | N | 0 |
| -6.4830  | -23.0110 | 8.2730  | C | 0 | -10.5430 | -18.4530 | -6.1980 | H | 0 | -3.5770  | -7.9330  | 1.3820   | H | 0 |
| -5.9860  | -22.0410 | 8.2820  | H | 0 | -11.8790 | -19.7610 | -5.0380 | C | 0 | -4.5090  | -7.8250  | 3.2930   | C | 0 |
| -5.9690  | -23.8140 | 7.0580  | C | 0 | -12.6350 | -19.6270 | -4.2640 | H | 0 | -3.8730  | -6.9930  | 3.5970   | H | 0 |
| -5.8850  | -23.2060 | 6.1570  | H | 0 | -12.4660 | -20.5890 | -6.2020 | C | 0 | -5.5420  | -7.5610  | 3.5180   | H | 0 |
| -4.9450  | -24.0710 | 7.3300  | H | 0 | -12.8530 | -21.4610 | -5.6770 | H | 0 | -4.0300  | -8.9780  | 4.1660   | C | 0 |
| -6.8830  | -24.9240 | 6.8620  | O | 0 | -13.2450 | -19.9970 | -6.6820 | H | 0 | -3.1790  | -9.7610  | 3.7180   | O | 0 |
| -6.4610  | -25.5830 | 6.3060  | H | 0 | -11.6820 | -20.8250 | -6.9220 | H | 0 | -4.2740  | -8.9500  | 5.4660   | N | 0 |
| -7.9680  | -22.6910 | 8.4090  | C | 0 | -10.7200 | -20.6150 | -4.4610 | C | 0 | -4.9420  | -8.2440  | 5.7400   | H | 0 |
| -8.7160  | -23.3460 | 9.1500  | O | 0 | -10.3690 | -20.0210 | -3.6170 | H | 0 | -4.1460  | -10.0580 | 6.3910   | C | 0 |
| -8.3980  | -21.7130 | 7.5950  | N | 0 | -11.1970 | -21.4660 | -3.9750 | H | 0 | -4.1380  | -11.0450 | 5.9290   | H | 0 |
| -7.6360  | -21.3610 | 7.0320  | H | 0 | -9.8640  | -20.8300 | -5.1010 | H | 0 | -3.1550  | -10.0140 | 6.8430   | H | 0 |
| -9.7720  | -21.2830 | 7.3980  | C | 0 | -10.1680 | -16.3000 | -5.1850 | C | 0 | -5.2850  | -10.0900 | 7.4010   | C | 0 |
| -10.4350 | -22.1470 | 7.4340  | H | 0 | -10.8070 | -15.5700 | -5.9690 | O | 0 | -6.1260  | -9.1990  | 7.4110   | O | 0 |
| -10.2760 | -20.4110 | 8.6010  | C | 0 | -8.8570  | -16.1880 | -4.9940 | N | 0 | -5.2090  | -10.8540 | 8.5340   | N | 0 |
| -10.3690 | -21.0150 | 9.5040  | H | 0 | -8.4430  | -16.8550 | -4.3590 | H | 0 | -4.2960  | -12.0140 | 8.7170   | C | 0 |
| -9.5060  | -19.6500 | 8.7310  | H | 0 | -7.9430  | -15.1800 | -5.6320 | C | 0 | -3.3950  | -11.6450 | 9.2070   | H | 0 |
| -11.5890 | -19.6780 | 8.3410  | C | 0 | -6.9210  | -15.3500 | -5.2950 | H | 0 | -3.9860  | -12.4740 | 7.7790   | H | 0 |
| -12.8180 | -20.3470 | 8.3120  | C | 0 | -7.8820  | -15.5160 | -7.1310 | C | 0 | -5.2650  | -12.8850 | 9.6180   | C | 0 |
| -12.9180 | -21.3770 | 8.6210  | H | 0 | -6.8580  | -15.7190 | -7.4440 | H | 0 | -4.5930  | -13.4060 | 10.3000  | H | 0 |
| -13.9680 | -19.6390 | 7.9720  | C | 0 | -8.5000  | -16.3490 | -7.4650 | H | 0 | -5.8490  | -13.6300 | 9.0780   | H | 0 |

|          |          |         |   |   |          |          |         |   |   |          |          |         |   |   |
|----------|----------|---------|---|---|----------|----------|---------|---|---|----------|----------|---------|---|---|
| -6.2270  | -11.9630 | 10.4280 | C | 0 | -11.1910 | -13.6640 | 20.3140 | C | 0 | -10.0380 | -8.2130  | 4.5230  | C | 0 |
| -5.9060  | -11.8120 | 11.4580 | H | 0 | -11.5630 | -14.7840 | 19.9050 | O | 0 | -8.9710  | -8.2340  | 5.4500  | N | 0 |
| -7.2660  | -12.2740 | 10.5370 | H | 0 | -11.0860 | -12.6580 | 19.3550 | N | 0 | -7.8630  | -8.0180  | 4.6920  | C | 0 |
| -6.2710  | -10.7290 | 9.5340  | C | 0 | -10.4980 | -11.8710 | 19.5910 | H | 0 | -6.8970  | -8.1170  | 5.1650  | H | 0 |
| -7.2290  | -10.6060 | 9.0300  | H | 0 | -11.6780 | -12.8100 | 18.0230 | C | 0 | -8.1320  | -8.0080  | 3.3650  | N | 0 |
| -6.1240  | -9.4890  | 10.3900 | C | 0 | -11.9610 | -13.8570 | 17.9160 | H | 0 | -7.4680  | -7.8240  | 2.6270  | H | 0 |
| -5.0430  | -8.9460  | 10.4780 | O | 0 | -12.8360 | -11.8750 | 17.7890 | C | 0 | -9.5180  | -8.1850  | 3.2950  | C | 0 |
| -7.1510  | -9.1900  | 11.1680 | N | 0 | -12.5460 | -10.8260 | 17.8440 | H | 0 | -9.9960  | -8.2930  | 2.3330  | H | 0 |
| -7.9890  | -9.7330  | 11.0110 | H | 0 | -13.6830 | -12.1590 | 16.5280 | C | 0 | -11.4290 | -10.6400 | 3.4740  | C | 0 |
| -6.9600  | -8.5180  | 12.4960 | C | 0 | -13.6310 | -13.1940 | 16.1930 | H | 0 | -10.4280 | -11.3480 | 3.4380  | O | 0 |
| -5.9520  | -8.1030  | 12.5100 | H | 0 | -14.7480 | -12.0010 | 16.6940 | H | 0 | -12.1850 | -10.2500 | 2.3870  | N | 0 |
| -7.9730  | -7.3080  | 12.7360 | C | 0 | -13.3650 | -11.4440 | 15.7690 | H | 0 | -13.0080 | -9.6670  | 2.4540  | H | 0 |
| -8.9170  | -7.8450  | 12.8270 | H | 0 | -13.6760 | -12.1230 | 18.8970 | O | 0 | -11.8350 | -10.5930 | 0.9930  | C | 0 |
| -7.8800  | -6.7700  | 13.6790 | H | 0 | -13.1260 | -12.0310 | 19.6780 | H | 0 | -10.7800 | -10.8610 | 0.9330  | H | 0 |
| -7.9280  | -6.3060  | 11.5260 | C | 0 | -10.5950 | -12.5100 | 16.9600 | C | 0 | -12.7130 | -11.7970 | 0.5450  | C | 0 |
| -8.4900  | -6.7490  | 10.7040 | H | 0 | -9.7630  | -11.6630 | 17.1330 | O | 0 | -12.5570 | -12.0220 | -0.5100 | H | 0 |
| -8.7490  | -5.0610  | 11.9920 | C | 0 | -10.5690 | -13.2590 | 15.8440 | N | 0 | -12.3190 | -12.6630 | 1.0760  | H | 0 |
| -8.2330  | -4.5110  | 12.7780 | H | 0 | -11.2970 | -13.9470 | 15.7130 | H | 0 | -14.0960 | -11.5990 | 0.8820  | O | 0 |
| -8.6210  | -4.3420  | 11.1830 | H | 0 | -9.8140  | -12.9430 | 14.6330 | C | 0 | -14.1990 | -11.6140 | 1.8360  | H | 0 |
| -9.8200  | -5.2620  | 12.0240 | H | 0 | -9.2080  | -12.0470 | 14.7720 | H | 0 | -12.1460 | -9.5370  | 0.0070  | C | 0 |
| -6.4920  | -5.8400  | 11.1410 | C | 0 | -8.8140  | -14.0500 | 14.3050 | C | 0 | -12.7760 | -8.5910  | 0.2670  | O | 0 |
| -6.5350  | -4.9720  | 10.4830 | H | 0 | -8.0950  | -14.0960 | 15.1220 | H | 0 | -11.6180 | -9.7150  | -1.1650 | N | 0 |
| -5.8950  | -5.6420  | 12.0310 | H | 0 | -9.3980  | -14.9660 | 14.2120 | H | 0 | -10.9530 | -10.4720 | -1.2410 | H | 0 |
| -6.1170  | -6.6880  | 10.5680 | H | 0 | -8.1140  | -13.9450 | 12.9110 | C | 0 | -11.9160 | -9.0080  | -2.3530 | C | 0 |
| -7.1980  | -9.4320  | 13.6940 | C | 0 | -8.8180  | -13.6080 | 12.1500 | H | 0 | -11.5690 | -7.9800  | -2.2480 | H | 0 |
| -8.1680  | -10.2060 | 13.6440 | O | 0 | -7.4260  | -13.1060 | 13.0150 | H | 0 | -11.1610 | -9.6580  | -3.5270 | C | 0 |
| -6.4230  | -9.3280  | 14.7570 | N | 0 | -7.2420  | -15.5060 | 12.3730 | S | 0 | -11.4620 | -9.3390  | -4.5250 | H | 0 |
| -5.6870  | -8.6370  | 14.7330 | H | 0 | -5.7890  | -15.7740 | 13.3810 | C | 0 | -10.1040 | -9.6880  | -3.2600 | H | 0 |
| -6.5810  | -10.0990 | 16.0270 | C | 0 | -4.9810  | -16.1420 | 12.7490 | H | 0 | -11.3390 | -10.7330 | -3.5080 | H | 0 |
| -7.5210  | -10.6450 | 15.9470 | H | 0 | -5.4910  | -14.7770 | 13.7040 | H | 0 | -13.5210 | -9.0530  | -2.7690 | C | 0 |
| -5.4370  | -11.1470 | 16.2510 | C | 0 | -5.9710  | -16.3530 | 14.2870 | H | 0 | -14.2890 | -9.6630  | -2.0760 | O | 0 |
| -4.5150  | -10.5680 | 16.2000 | H | 0 | -10.8220 | -12.6010 | 13.5040 | C | 0 | -13.9180 | -8.4650  | -3.9890 | N | 0 |
| -5.6460  | -11.8900 | 17.5470 | C | 0 | -11.7840 | -13.3920 | 13.3670 | O | 0 | -13.2320 | -7.9510  | -4.5240 | H | 0 |
| -4.9490  | -12.7200 | 17.6660 | H | 0 | -10.6270 | -11.5670 | 12.7390 | N | 0 | -15.3410 | -8.5010  | -4.3540 | C | 0 |
| -5.4130  | -11.2440 | 18.3940 | H | 0 | -9.7660  | -11.0820 | 12.9490 | H | 0 | -15.9000 | -8.0310  | -3.5450 | H | 0 |
| -6.6860  | -12.1680 | 17.7140 | H | 0 | -11.4950 | -10.9830 | 11.6790 | C | 0 | -15.4090 | -7.8170  | -5.6940 | C | 0 |
| -5.3670  | -12.2180 | 15.1130 | C | 0 | -12.4510 | -11.5040 | 11.7140 | H | 0 | -15.1580 | -6.7750  | -5.4950 | H | 0 |
| -4.8910  | -11.9730 | 14.1630 | H | 0 | -11.8910 | -9.4980  | 11.8490 | C | 0 | -14.7170 | -8.3050  | -6.3800 | H | 0 |
| -4.8950  | -13.1560 | 15.4080 | H | 0 | -11.0990 | -8.7690  | 11.6790 | H | 0 | -16.8260 | -7.8400  | -6.3440 | C | 0 |
| -6.4330  | -12.3160 | 14.9090 | H | 0 | -12.5280 | -9.3250  | 10.9820 | H | 0 | -17.1610 | -8.9440  | -7.0400 | C | 0 |
| -6.6110  | -9.1880  | 17.2440 | C | 0 | -12.5600 | -9.1360  | 13.1940 | C | 0 | -16.3870 | -9.6950  | -7.1030 | H | 0 |
| -5.8080  | -8.2960  | 17.3940 | O | 0 | -13.9340 | -9.5000  | 13.4310 | C | 0 | -18.4140 | -9.0780  | -7.5720 | C | 0 |
| -7.6420  | -9.3950  | 18.0160 | N | 0 | -14.5310 | -9.8780  | 12.6140 | H | 0 | -18.6820 | -9.9450  | -8.1570 | H | 0 |
| -8.3660  | -10.0380 | 17.7300 | H | 0 | -14.4830 | -9.3570  | 14.6720 | C | 0 | -19.4450 | -8.1730  | -7.3470 | C | 0 |
| -7.8670  | -8.6250  | 19.2010 | C | 0 | -15.5070 | -9.6270  | 14.8840 | H | 0 | -20.7780 | -8.3320  | -7.7060 | O | 0 |
| -6.8950  | -8.3800  | 19.6310 | H | 0 | -13.7490 | -8.8820  | 15.7740 | C | 0 | -21.3060 | -7.5330  | -7.6440 | H | 0 |
| -8.3830  | -7.1870  | 18.8660 | C | 0 | -14.2730 | -8.7230  | 17.0040 | O | 0 | -19.0970 | -6.9610  | -6.7150 | C | 0 |
| -7.6210  | -6.7500  | 18.2200 | H | 0 | -15.2230 | -8.8580  | 16.9530 | H | 0 | -19.8190 | -6.1660  | -6.6030 | H | 0 |
| -9.8220  | -7.3090  | 18.3390 | C | 0 | -12.3640 | -8.5740  | 15.5830 | C | 0 | -17.7740 | -6.8020  | -6.1510 | C | 0 |
| -9.8730  | -8.1240  | 17.6170 | H | 0 | -11.7460 | -8.3140  | 16.4290 | H | 0 | -17.5090 | -5.8670  | -5.6800 | H | 0 |
| -10.6100 | -7.4100  | 19.0850 | H | 0 | -11.8040 | -8.7020  | 14.2780 | C | 0 | -15.9520 | -9.9580  | -4.2910 | C | 0 |
| -9.9000  | -6.3820  | 17.7710 | H | 0 | -10.7550 | -8.4810  | 14.1510 | H | 0 | -15.3450 | -10.9320 | -4.7450 | O | 0 |
| -8.5380  | -6.3530  | 20.0860 | C | 0 | -10.9080 | -11.2090 | 10.2610 | C | 0 | -17.2010 | -10.0550 | -3.8300 | N | 0 |
| -9.0120  | -5.4330  | 19.7460 | H | 0 | -9.7330  | -10.8940 | 10.0530 | O | 0 | -17.8810 | -11.3470 | -3.9050 | C | 0 |
| -9.2480  | -6.7600  | 20.8050 | H | 0 | -11.6630 | -11.8630 | 9.3100  | N | 0 | -17.3600 | -12.1520 | -3.3860 | H | 0 |
| -7.5790  | -6.1030  | 20.5390 | H | 0 | -12.6510 | -11.9980 | 9.4710  | H | 0 | -18.1440 | -11.6210 | -4.9270 | H | 0 |
| -8.6410  | -9.4060  | 20.3150 | C | 0 | -11.1010 | -12.1500 | 7.9890  | C | 0 | -19.1690 | -11.1410 | -3.1870 | C | 0 |
| -9.6580  | -9.9700  | 20.0450 | O | 0 | -10.1250 | -11.6700 | 7.9160  | H | 0 | -18.9370 | -11.2370 | -2.1260 | H | 0 |
| -8.1600  | -9.5320  | 21.5250 | N | 0 | -11.0320 | -13.6840 | 7.7470  | C | 0 | -19.8720 | -11.9090 | -3.5100 | H | 0 |
| -7.2180  | -9.2470  | 21.7510 | H | 0 | -12.0550 | -14.0120 | 7.5620  | H | 0 | -19.5310 | -9.7650  | -3.5240 | C | 0 |
| -8.8620  | -10.2090 | 22.6600 | C | 0 | -10.0740 | -13.9280 | 6.5740  | C | 0 | -20.3550 | -9.4130  | -2.9030 | H | 0 |
| -8.2490  | -10.0600 | 23.5490 | H | 0 | -10.0140 | -14.9940 | 6.3530  | H | 0 | -19.7610 | -9.7630  | -4.5890 | H | 0 |
| -9.7880  | -9.6830  | 22.8920 | H | 0 | -10.2960 | -13.5250 | 5.5860  | H | 0 | -18.1630 | -9.0780  | -3.1890 | C | 0 |
| -9.1210  | -11.6720 | 22.2970 | C | 0 | -9.0770  | -13.5580 | 6.8140  | H | 0 | -18.1850 | -8.1320  | -3.7300 | H | 0 |
| -8.1070  | -12.4160 | 22.1680 | O | 0 | -10.5320 | -14.5280 | 8.9240  | C | 0 | -17.9290 | -8.7110  | -1.6990 | C | 0 |
| -10.3530 | -12.0570 | 22.1560 | N | 0 | -9.5180  | -14.2090 | 9.1640  | H | 0 | -18.8760 | -8.4250  | -1.0020 | O | 0 |
| -11.0630 | -11.3470 | 22.0420 | H | 0 | -11.1650 | -14.3890 | 9.8010  | H | 0 | -16.6970 | -8.7940  | -1.2300 | N | 0 |
| -10.6890 | -13.4600 | 21.7710 | C | 0 | -10.5240 | -15.5510 | 8.5490  | H | 0 | -15.9520 | -9.0390  | -1.8660 | H | 0 |
| -9.8590  | -14.1370 | 21.9760 | H | 0 | -11.9620 | -11.4450 | 6.9690  | C | 0 | -16.2570 | -8.4240  | 0.0830  | C | 0 |
| -11.8390 | -13.9330 | 22.7510 | C | 0 | -13.1860 | -11.5180 | 7.0520  | O | 0 | -15.2100 | -8.7170  | 0.1540  | H | 0 |
| -11.9910 | -14.9670 | 22.4410 | H | 0 | -11.2940 | -10.7580 | 5.9810  | N | 0 | -16.2290 | -6.9550  | 0.1670  | C | 0 |
| -11.3230 | -13.9810 | 24.1680 | C | 0 | -10.2850 | -10.7560 | 6.0350  | H | 0 | -17.2630 | -6.6180  | 0.2400  | H | 0 |
| -10.2580 | -14.1800 | 24.2920 | H | 0 | -11.8840 | -10.0200 | 4.7890  | C | 0 | -15.7150 | -6.6600  | 1.0810  | H | 0 |
| -11.5240 | -13.0770 | 24.7420 | H | 0 | -12.9680 | -10.1350 | 4.8000  | H | 0 | -15.5470 | -6.2520  | -0.9330 | C | 0 |
| -11.9030 | -14.7470 | 24.6820 | H | 0 | -11.5020 | -8.5020  | 4.8560  | C | 0 | -16.1260 | -5.3680  | -1.6070 | O | 0 |
| -12.9930 | -13.1840 | 22.6590 | O | 0 | -12.0460 | -7.8460  | 4.1770  | H | 0 | -14.3140 | -6.5040  | -1.2390 | N | 0 |
| -13.5870 | -13.6280 | 22.0500 | H | 0 | -11.6260 | -8.0750  | 5.8520  | H | 0 | -13.8900 | -5.9650  | -1.9800 | H | 0 |



|          |          |         |   |   |          |          |         |   |   |          |          |         |   |   |
|----------|----------|---------|---|---|----------|----------|---------|---|---|----------|----------|---------|---|---|
| -13.7530 | -7.2260  | -0.8100 | H | 0 | -10.5850 | -16.4230 | 11.8250 | H | 0 | -8.3990  | -26.2750 | 20.5470 | H | 0 |
| -17.0760 | -9.1660  | 1.1990  | C | 0 | -10.2710 | -18.1490 | 12.2610 | H | 0 | -7.8920  | -24.1240 | 21.0640 | C | 0 |
| -17.8980 | -8.5530  | 1.8970  | O | 0 | -10.9290 | -17.5710 | 10.6200 | H | 0 | -7.4410  | -23.8240 | 20.1180 | H | 0 |
| -16.9260 | -10.4710 | 1.2840  | N | 0 | -12.8830 | -18.8760 | 11.8900 | C | 0 | -8.4460  | -23.3090 | 21.5280 | H | 0 |
| -16.6550 | -10.8290 | 0.3800  | H | 0 | -12.7680 | -19.0140 | 10.8150 | H | 0 | -6.7810  | -24.8010 | 21.9250 | C | 0 |
| -17.5190 | -11.2400 | 2.3770  | C | 0 | -12.2570 | -19.5200 | 12.5070 | H | 0 | -7.1870  | -25.0310 | 22.9100 | H | 0 |
| -18.5280 | -10.9180 | 2.6310  | H | 0 | -13.9090 | -18.6820 | 12.2030 | H | 0 | -6.3820  | -25.6730 | 21.4080 | H | 0 |
| -17.6420 | -12.7210 | 1.8030  | C | 0 | -13.3770 | -16.1550 | 15.8130 | C | 0 | -5.7200  | -23.6710 | 21.9650 | C | 0 |
| -17.9970 | -12.5740 | 0.7830  | H | 0 | -12.5190 | -15.3530 | 16.2040 | O | 0 | -5.2840  | -23.6390 | 20.9670 | H | 0 |
| -16.6500 | -13.1590 | 1.6920  | H | 0 | -14.0360 | -16.9270 | 16.6050 | N | 0 | -6.1450  | -22.7120 | 22.2640 | H | 0 |
| -18.6230 | -13.5920 | 2.4240  | C | 0 | -14.7030 | -17.5860 | 16.2270 | H | 0 | -4.6720  | -24.1270 | 22.9190 | N | 0 |
| -19.1140 | -14.6910 | 1.8070  | N | 0 | -13.8350 | -16.9170 | 18.0850 | C | 0 | -4.3820  | -25.0900 | 22.8280 | H | 0 |
| -19.9440 | -15.3160 | 2.6880  | C | 0 | -13.5850 | -15.9320 | 18.4800 | H | 0 | -3.8900  | -23.4890 | 22.8780 | H | 0 |
| -20.3180 | -16.3010 | 2.4530  | H | 0 | -15.1720 | -17.3520 | 18.7300 | C | 0 | -4.9970  | -24.1300 | 23.8750 | H | 0 |
| -20.0070 | -14.6630 | 3.8460  | N | 0 | -15.9250 | -16.6150 | 18.4500 | H | 0 | -10.3220 | -26.3620 | 18.9990 | C | 0 |
| -20.4800 | -15.1780 | 4.5750  | H | 0 | -15.4850 | -18.2490 | 18.1950 | H | 0 | -10.5630 | -27.3230 | 19.6940 | O | 0 |
| -19.1230 | -13.6210 | 3.7520  | C | 0 | -15.1930 | -17.5420 | 20.2500 | C | 0 | -10.5010 | -26.4450 | 17.6800 | N | 0 |
| -18.8750 | -12.9900 | 4.5930  | H | 0 | -16.2130 | -17.9590 | 20.8110 | O | 0 | -10.5850 | -27.7400 | 16.9710 | C | 0 |
| -16.5230 | -11.2100 | 3.5400  | C | 0 | -14.2010 | -17.0960 | 20.8900 | O | 0 | -11.5040 | -28.2240 | 17.3030 | H | 0 |
| -15.3650 | -11.3940 | 3.3620  | O | 0 | -12.6670 | -18.8240 | 18.4360 | C | 0 | -9.7370  | -28.4090 | 17.1230 | H | 0 |
| -17.0650 | -10.9220 | 4.8060  | N | 0 | -12.8370 | -19.0850 | 18.4870 | O | 0 | -10.5780 | -27.5340 | 15.4870 | C | 0 |
| -18.0610 | -10.7740 | 4.8860  | H | 0 | -11.5030 | -17.3260 | 18.8050 | N | 0 | -11.6370 | -27.5900 | 15.2360 | H | 0 |
| -16.2780 | -10.7370 | 5.9860  | C | 0 | -11.5480 | -16.3220 | 18.9100 | H | 0 | -9.9590  | -28.2390 | 14.9330 | H | 0 |
| -15.2260 | -10.9500 | 5.7980  | H | 0 | -10.2590 | -18.0240 | 19.2090 | C | 0 | -10.2470 | -26.0760 | 15.2670 | C | 0 |
| -16.3230 | -9.2090  | 6.4890  | C | 0 | -9.9880  | -18.7560 | 18.4480 | H | 0 | -10.8680 | -25.7240 | 14.4430 | H | 0 |
| -17.3310 | -8.9390  | 6.8030  | H | 0 | -9.0510  | -17.0750 | 19.2540 | C | 0 | -9.1830  | -25.9320 | 15.0790 | H | 0 |
| -15.3840 | -8.9660  | 7.6170  | C | 0 | -9.2590  | -16.4020 | 20.0850 | H | 0 | -10.4720 | -25.3880 | 16.7080 | C | 0 |
| -14.3350 | -9.2030  | 7.4390  | H | 0 | -8.1730  | -17.7210 | 19.2530 | H | 0 | -9.4860  | -24.9310 | 16.7980 | H | 0 |
| -15.3490 | -7.9300  | 7.9550  | H | 0 | -8.7820  | -16.1940 | 18.0170 | C | 0 | -11.6630 | -24.4020 | 16.8040 | C | 0 |
| -15.7340 | -9.2790  | 8.6010  | H | 0 | -9.6220  | -15.5070 | 17.9210 | H | 0 | -12.5520 | -24.5940 | 17.6450 | O | 0 |
| -15.9550 | -8.3060  | 5.3210  | C | 0 | -7.5650  | -15.3840 | 18.2670 | C | 0 | -11.4720 | -23.3010 | 16.0150 | N | 0 |
| -14.9950 | -8.5620  | 4.8730  | H | 0 | -7.6290  | -14.8280 | 19.2030 | H | 0 | -10.6660 | -23.2090 | 15.4140 | H | 0 |
| -16.7520 | -8.1910  | 4.5870  | H | 0 | -6.6230  | -15.9320 | 18.2310 | H | 0 | -12.2580 | -22.0380 | 15.9750 | C | 0 |
| -15.8060 | -7.3120  | 5.7430  | H | 0 | -7.5050  | -14.6110 | 17.5010 | H | 0 | -12.1110 | -21.4170 | 16.8590 | H | 0 |
| -16.6980 | -11.6350 | 7.1330  | C | 0 | -8.6110  | -16.9950 | 16.7230 | C | 0 | -11.8530 | -21.1650 | 14.7420 | C | 0 |
| -17.8600 | -11.8160 | 7.2540  | O | 0 | -8.1780  | -16.3810 | 15.9330 | H | 0 | -12.6050 | -20.4130 | 14.5040 | H | 0 |
| -15.7880 | -12.2120 | 7.8820  | N | 0 | -7.7700  | -17.6860 | 16.7860 | H | 0 | -10.9200 | -20.6110 | 14.8440 | H | 0 |
| -14.8300 | -12.1100 | 7.5770  | H | 0 | -9.5440  | -17.4280 | 16.3630 | H | 0 | -11.7130 | -21.9780 | 13.4950 | C | 0 |
| -16.0380 | -13.2080 | 8.9030  | C | 0 | -10.4120 | -18.7120 | 20.4870 | C | 0 | -12.8140 | -22.1780 | 12.6570 | C | 0 |
| -17.1090 | -13.3260 | 9.0610  | H | 0 | -9.4610  | -19.4370 | 20.8350 | O | 0 | -13.7260 | -21.6550 | 12.9030 | H | 0 |
| -15.5110 | -14.5230 | 8.3690  | C | 0 | -11.5150 | -18.5800 | 21.2570 | N | 0 | -12.7200 | -22.9230 | 11.5040 | C | 0 |
| -14.4670 | -14.3660 | 8.0950  | H | 0 | -12.2400 | -17.9510 | 20.9420 | H | 0 | -13.5560 | -23.1390 | 10.8550 | H | 0 |
| -15.4730 | -15.1870 | 9.2330  | H | 0 | -11.7410 | -19.2940 | 22.5420 | C | 0 | -11.4730 | -23.5050 | 11.1940 | C | 0 |
| -16.2730 | -15.3440 | 7.3530  | C | 0 | -10.8810 | -19.2340 | 23.2090 | H | 0 | -11.4310 | -24.2840 | 10.0610 | O | 0 |
| -16.9300 | -16.5000 | 7.7050  | C | 0 | -12.9480 | -18.7590 | 23.3340 | C | 0 | -12.2740 | -24.2210 | 9.6060  | H | 0 |
| -17.0560 | -16.8300 | 8.7250  | H | 0 | -13.9120 | -19.0090 | 22.8930 | H | 0 | -10.3610 | -23.4100 | 12.0670 | C | 0 |
| -17.5940 | -17.2030 | 6.6390  | C | 0 | -13.0390 | -19.2620 | 24.8210 | C | 0 | -9.4010  | -23.8600 | 11.8600 | H | 0 |
| -18.1750 | -18.0660 | 6.9290  | H | 0 | -13.3890 | -20.2940 | 24.8170 | H | 0 | -10.5110 | -22.6640 | 13.2260 | C | 0 |
| -17.6240 | -16.7790 | 5.2730  | C | 0 | -12.0150 | -19.1280 | 25.1720 | H | 0 | -9.6920  | -22.5950 | 13.9270 | H | 0 |
| -18.3450 | -17.4110 | 4.2870  | O | 0 | -13.7210 | -18.5510 | 25.2860 | H | 0 | -13.8130 | -22.3180 | 15.9090 | C | 0 |
| -17.7520 | -17.6050 | 3.5570  | H | 0 | -12.9380 | -17.3520 | 23.4380 | O | 0 | -14.1790 | -23.2690 | 15.2360 | O | 0 |
| -16.8200 | -15.6660 | 4.9810  | C | 0 | -13.1990 | -17.0530 | 22.5630 | H | 0 | -14.7170 | -21.4880 | 16.4560 | N | 0 |
| -16.6520 | -15.4020 | 3.9480  | H | 0 | -11.9260 | -20.8020 | 22.2230 | C | 0 | -14.3680 | -20.7590 | 17.0620 | H | 0 |
| -16.1480 | -14.9340 | 5.9820  | C | 0 | -11.7100 | -21.5820 | 23.1310 | O | 0 | -16.0940 | -21.4050 | 16.0550 | C | 0 |
| -15.5210 | -14.1100 | 5.6770  | H | 0 | -12.3600 | -21.1970 | 21.0340 | N | 0 | -16.3270 | -22.1960 | 15.3410 | H | 0 |
| -15.4030 | -12.8880 | 10.2770 | C | 0 | -12.4150 | -20.5200 | 20.2860 | H | 0 | -16.9840 | -21.5280 | 17.3070 | C | 0 |
| -14.3240 | -12.3590 | 10.3420 | O | 0 | -12.7020 | -22.4880 | 20.5800 | C | 0 | -16.5810 | -20.7920 | 18.0030 | H | 0 |
| -15.8810 | -13.5060 | 11.3400 | N | 0 | -12.8900 | -23.0610 | 21.4870 | H | 0 | -17.9970 | -21.2080 | 17.0660 | H | 0 |
| -16.6680 | -14.1200 | 11.1910 | H | 0 | -14.0120 | -22.5750 | 19.7660 | C | 0 | -17.0840 | -22.5470 | 17.6800 | H | 0 |
| -15.3400 | -13.4240 | 12.6970 | C | 0 | -13.6910 | -22.2870 | 18.7650 | H | 0 | -16.2780 | -20.0730 | 15.2640 | C | 0 |
| -14.4190 | -12.8420 | 12.6590 | H | 0 | -14.4530 | -23.5550 | 19.9500 | H | 0 | -15.6150 | -19.1220 | 15.6370 | O | 0 |
| -16.3420 | -12.5860 | 13.4970 | C | 0 | -15.0660 | -21.5660 | 20.3220 | C | 0 | -17.2150 | -19.9780 | 14.2840 | N | 0 |
| -17.2200 | -13.2250 | 13.6000 | H | 0 | -14.9540 | -20.5910 | 19.8480 | H | 0 | -17.8470 | -20.7610 | 14.1990 | H | 0 |
| -16.0740 | -12.4540 | 14.5460 | H | 0 | -16.0540 | -21.8260 | 19.9430 | H | 0 | -17.5090 | -18.6340 | 13.6630 | C | 0 |
| -16.6990 | -11.6820 | 13.0050 | H | 0 | -15.3490 | -21.5530 | 21.8010 | C | 0 | -16.5820 | -18.0650 | 13.5950 | H | 0 |
| -15.1140 | -14.8630 | 13.2010 | C | 0 | -15.3030 | -22.5490 | 22.4530 | O | 0 | -17.9920 | -18.8500 | 12.1910 | C | 0 |
| -16.0860 | -15.6620 | 13.2260 | O | 0 | -15.6810 | -20.4680 | 22.4140 | N | 0 | -18.8940 | -19.4610 | 12.2210 | H | 0 |
| -13.9250 | -15.1750 | 13.5760 | N | 0 | -15.9150 | -20.5220 | 23.3950 | H | 0 | -18.4460 | -17.5500 | 11.5050 | C | 0 |
| -13.1930 | -14.4790 | 13.5740 | H | 0 | -15.9150 | -19.6070 | 21.9410 | H | 0 | -19.2440 | -17.1560 | 12.1350 | H | 0 |
| -13.6370 | -16.4150 | 14.3030 | C | 0 | -11.4680 | -23.0870 | 19.9430 | C | 0 | -17.5490 | -16.9300 | 11.5010 | H | 0 |
| -14.4130 | -17.1730 | 14.1990 | H | 0 | -10.8800 | -22.4790 | 19.0620 | O | 0 | -18.9200 | -17.7370 | 10.5420 | H | 0 |
| -12.3730 | -16.9490 | 13.6600 | C | 0 | -11.1880 | -24.3450 | 20.2240 | N | 0 | -16.8690 | -19.6220 | 11.4020 | C | 0 |
| -11.6680 | -16.1280 | 13.7840 | H | 0 | -11.4960 | -24.6240 | 21.1450 | H | 0 | -16.0790 | -18.9090 | 11.1640 | H | 0 |
| -11.9490 | -17.7850 | 14.2160 | H | 0 | -9.9590  | -24.9640 | 19.6200 | C | 0 | -16.4510 | -20.4870 | 11.9160 | H | 0 |
| -12.3620 | -17.4670 | 12.1930 | C | 0 | -9.4160  | -24.3090 | 18.9380 | H | 0 | -17.4620 | -20.0570 | 10.0730 | C | 0 |
| -12.9190 | -16.8010 | 11.5340 | H | 0 | -8.8730  | -25.3030 | 20.6870 | C | 0 | -18.3320 | -20.6920 | 10.2360 | H | 0 |
| -10.9040 | -17.4580 | 11.7040 | C | 0 | -9.4300  | -25.5730 | 21.5840 | H | 0 | -17.7390 | -19.1730 | 9.4970  | H | 0 |

|          |          |         |   |   |          |          |         |   |   |          |         |          |   |   |
|----------|----------|---------|---|---|----------|----------|---------|---|---|----------|---------|----------|---|---|
| -16.7050 | -20.5700 | 9.4790  | H | 0 | -24.5320 | -5.9610  | 6.9910  | H | 0 | -22.7210 | -0.2970 | -8.2590  | H | 0 |
| -18.5440 | -17.8700 | 14.4100 | C | 0 | -22.9370 | -5.5310  | 5.5780  | C | 0 | -24.3360 | -0.3740 | -9.4720  | C | 0 |
| -19.6230 | -18.3890 | 14.7400 | O | 0 | -23.4200 | -4.3630  | 5.0680  | O | 0 | -23.8890 | -0.8780 | -10.5040 | O | 0 |
| -18.1620 | -16.6800 | 14.8530 | N | 0 | -24.0680 | -3.8920  | 5.5970  | H | 0 | -25.4910 | 0.3350  | -9.5210  | N | 0 |
| -17.3150 | -16.3120 | 14.4430 | H | 0 | -21.7150 | -5.9700  | 5.0650  | C | 0 | -25.9270 | 0.5360  | -10.4100 | H | 0 |
| -19.0130 | -15.9090 | 15.6760 | C | 0 | -21.2100 | -5.4050  | 4.2950  | H | 0 | -25.9900 | 0.5630  | -8.6730  | H | 0 |
| -19.5560 | -16.5370 | 16.3820 | H | 0 | -21.0810 | -7.1280  | 5.6370  | C | 0 | -22.8870 | -3.0080 | -8.5450  | C | 0 |
| -18.1000 | -15.0320 | 16.4990 | C | 0 | -20.1150 | -7.5200  | 5.3570  | H | 0 | -21.6710 | -2.8850 | -8.3740  | O | 0 |
| -17.4100 | -15.7510 | 16.9400 | H | 0 | -21.1140 | -10.2660 | 5.1310  | C | 0 | -23.3870 | -3.6930 | -9.5600  | N | 0 |
| -17.4180 | -14.3730 | 15.9610 | H | 0 | -20.0150 | -10.6200 | 4.7230  | O | 0 | -24.3890 | -3.6920 | -9.6870  | H | 0 |
| -18.9160 | -14.2690 | 17.5840 | C | 0 | -22.0090 | -9.7610  | 4.2700  | N | 0 | -22.6790 | -4.6500 | -10.4270 | C | 0 |
| -19.6620 | -13.5390 | 17.2710 | H | 0 | -22.9430 | -9.7070  | 4.6510  | H | 0 | -22.0590 | -5.2260 | -9.7390  | H | 0 |
| -19.3500 | -15.0340 | 18.2280 | H | 0 | -21.8940 | -9.5190  | 2.7890  | C | 0 | -23.8540 | -5.5370 | -11.0330 | C | 0 |
| -17.9300 | -13.4410 | 18.4310 | C | 0 | -20.8470 | -9.3550  | 2.5360  | H | 0 | -23.4850 | -6.4350 | -11.5280 | H | 0 |
| -17.1440 | -14.1100 | 18.7810 | H | 0 | -22.3510 | -10.7970 | 1.9640  | C | 0 | -24.4240 | -5.9160 | -10.1840 | H | 0 |
| -17.4850 | -12.7290 | 17.7370 | H | 0 | -23.4250 | -10.9140 | 2.1080  | H | 0 | -24.7200 | -4.8120 | -11.9340 | O | 0 |
| -18.4940 | -12.5450 | 19.5050 | C | 0 | -21.8700 | -10.6160 | 0.4590  | C | 0 | -25.4890 | -5.3790 | -12.0210 | H | 0 |
| -17.6320 | -11.9370 | 19.7820 | H | 0 | -22.0600 | -9.5620  | 0.2580  | H | 0 | -21.8490 | -3.9670 | -11.4710 | C | 0 |
| -19.2540 | -11.9650 | 18.9830 | H | 0 | -20.8080 | -10.8420 | 0.3690  | H | 0 | -21.0480 | -4.5830 | -12.0890 | O | 0 |
| -19.1380 | -13.2800 | 20.5720 | N | 0 | -22.4920 | -11.2340 | -0.1900 | H | 0 | -21.9380 | -2.6630 | -12.9570 | N | 0 |
| -19.9380 | -13.8060 | 20.2500 | H | 0 | -21.7420 | -11.9460 | 2.5520  | O | 0 | -22.6290 | -2.1100 | -11.1880 | H | 0 |
| -18.5900 | -13.9680 | 21.0670 | H | 0 | -21.3640 | -11.6350 | 3.3780  | H | 0 | -21.1040 | -1.9290 | -12.6250 | C | 0 |
| -19.5490 | -12.6460 | 21.2430 | H | 0 | -22.8260 | -8.2700  | 2.4480  | C | 0 | -20.9980 | -2.5400 | -13.5220 | H | 0 |
| -20.0510 | -15.1350 | 14.8390 | C | 0 | -24.0410 | -8.3020  | 2.6430  | O | 0 | -21.8980 | -0.6330 | -12.9570 | C | 0 |
| -21.2320 | -15.1110 | 15.2600 | O | 0 | -22.2390 | -7.2610  | 1.7940  | N | 0 | -22.9150 | -0.8490 | -13.2840 | H | 0 |
| -19.6520 | -14.6990 | 13.5990 | N | 0 | -20.8330 | -7.1000  | 1.4310  | C | 0 | -22.0420 | -0.0480 | -12.0480 | H | 0 |
| -18.7270 | -14.8870 | 13.2400 | H | 0 | -20.3680 | -7.8670  | 0.8110  | H | 0 | -21.2010 | 0.1530  | -14.0400 | C | 0 |
| -20.5800 | -14.1510 | 12.6380 | C | 0 | -20.2500 | -7.0320  | 2.3500  | H | 0 | -20.1530 | 0.2960  | -13.7740 | H | 0 |
| -21.4640 | -14.7880 | 12.6350 | H | 0 | -20.5970 | -5.6170  | 0.9680  | C | 0 | -21.1100 | -0.4590 | -14.9370 | H | 0 |
| -21.0580 | -12.7180 | 13.0230 | C | 0 | -20.4880 | -5.5740  | -0.1160 | H | 0 | -21.9140 | 1.5310  | -14.3390 | C | 0 |
| -21.5700 | -12.2250 | 12.1970 | H | 0 | -19.7240 | -5.1020  | 1.3690  | H | 0 | -23.1590 | 1.7060  | -14.1350 | O | 0 |
| -21.8970 | -12.9110 | 13.6920 | H | 0 | -21.8770 | -4.9120  | 1.3060  | C | 0 | -21.3220 | 2.4540  | -15.0550 | N | 0 |
| -20.1890 | -11.6990 | 13.5510 | C | 0 | -22.1050 | -4.1480  | 0.5630  | H | 0 | -21.8740 | 3.1410  | -15.5470 | H | 0 |
| -20.0800 | -11.4620 | 14.8390 | C | 0 | -21.6780 | -4.3720  | 2.2310  | H | 0 | -20.4120 | 2.1490  | -15.3710 | H | 0 |
| -20.5930 | -11.9270 | 15.6680 | H | 0 | -22.9750 | -6.0600  | 1.4340  | C | 0 | -19.6360 | -1.7350 | -12.0940 | C | 0 |
| -19.1660 | -10.4640 | 15.0250 | N | 0 | -23.5080 | -5.7390  | 2.3290  | H | 0 | -18.6920 | -1.4760 | -12.8430 | O | 0 |
| -18.9640 | -10.0980 | 15.9440 | H | 0 | -23.7030 | -6.0590  | 0.0720  | C | 0 | -19.5000 | -1.8080 | -10.7710 | N | 0 |
| -18.6730 | -9.9260  | 13.8630 | C | 0 | -23.1190 | -6.5630  | -0.8680 | O | 0 | -20.3450 | -1.8480 | -10.2210 | H | 0 |
| -17.7640 | -8.9090  | 13.5780 | C | 0 | -24.8480 | -5.3970  | -0.0830 | N | 0 | -18.2070 | -1.7500 | -10.0930 | C | 0 |
| -17.3220 | -8.2770  | 14.3350 | H | 0 | -25.3560 | -4.9470  | 0.6640  | H | 0 | -17.7930 | -0.7430 | -10.0320 | H | 0 |
| -17.5400 | -8.7400  | 12.1950 | C | 0 | -25.3330 | -5.2220  | -1.4370 | C | 0 | -18.4570 | -2.3590 | -8.6070  | C | 0 |
| -17.0120 | -7.8560  | 11.8700 | H | 0 | -25.2890 | -6.2020  | -1.9130 | H | 0 | -19.3790 | -1.9390 | -8.2050  | H | 0 |
| -18.0520 | -9.5490  | 11.1610 | C | 0 | -26.7810 | -4.7610  | -1.3720 | C | 0 | -18.4910 | -3.4440 | -8.7060  | H | 0 |
| -17.8440 | -9.2670  | 10.1390 | H | 0 | -26.6960 | -3.7910  | -0.8800 | H | 0 | -17.5810 | -2.0550 | -8.0330  | H | 0 |
| -18.9200 | -10.6460 | 11.5060 | C | 0 | -27.4140 | -4.6410  | -2.7430 | C | 0 | -17.1730 | -2.6500 | -10.6720 | C | 0 |
| -19.4520 | -11.2130 | 10.7560 | H | 0 | -26.8980 | -3.8450  | -3.2810 | H | 0 | -15.9920 | -2.3270 | -10.7540 | O | 0 |
| -19.2680 | -10.8020 | 12.8610 | C | 0 | -27.3780 | -5.5580  | -3.3320 | H | 0 | -17.5790 | -3.8780 | -11.1730 | N | 0 |
| -19.9850 | -14.0280 | 11.2160 | C | 0 | -28.4370 | -4.2880  | -2.8720 | H | 0 | -18.5140 | -4.1620 | -10.9160 | H | 0 |
| -18.7940 | -14.1760 | 10.9310 | O | 0 | -27.7590 | -5.5860  | -0.5310 | C | 0 | -16.5490 | -4.8700 | -11.6800 | C | 0 |
| -20.8780 | -13.6930 | 10.2640 | N | 0 | -28.0790 | -6.4910  | -1.0490 | H | 0 | -15.7530 | -4.9240 | -10.9370 | H | 0 |
| -21.8330 | -13.5270 | 10.5500 | H | 0 | -27.2210 | -5.7760  | 0.3970  | H | 0 | -17.1100 | -6.2850 | -11.7900 | C | 0 |
| -20.6080 | -13.4130 | 8.8160  | C | 0 | -28.6860 | -5.0430  | -0.3460 | H | 0 | -18.0200 | -6.4310 | -12.3710 | H | 0 |
| -19.5450 | -13.1760 | 8.7700  | H | 0 | -24.4430 | -4.2460  | -2.2560 | C | 0 | -15.9800 | -7.2020 | -12.2270 | C | 0 |
| -20.6370 | -14.7380 | 7.9730  | C | 0 | -24.0490 | -3.2250  | -1.7120 | O | 0 | -15.7690 | -7.0460 | -13.2850 | H | 0 |
| -20.2750 | -14.4580 | 6.9830  | H | 0 | -24.0340 | -4.5770  | -3.4500 | N | 0 | -15.1130 | -6.8520 | -11.6660 | H | 0 |
| -19.8850 | -15.3900 | 8.4170  | H | 0 | -24.3770 | -5.4780  | -3.7500 | H | 0 | -16.2090 | -8.2560 | -12.0680 | H | 0 |
| -21.9830 | -15.4520 | 8.0570  | C | 0 | -23.1150 | -3.8100  | -4.3310 | C | 0 | -17.6060 | -6.7870 | -10.3750 | C | 0 |
| -22.0430 | -16.0500 | 8.9670  | H | 0 | -23.0220 | -2.7840  | -3.9760 | H | 0 | -18.2660 | -7.6360 | -10.5520 | H | 0 |
| -22.7590 | -14.6880 | 8.1060  | H | 0 | -21.6780 | -4.3690  | -4.3630 | C | 0 | -16.8860 | -7.1660 | -9.6500  | H | 0 |
| -22.0690 | -16.3790 | 6.8850  | C | 0 | -21.7890 | -5.3560  | -4.8130 | H | 0 | -18.1710 | -5.9460 | -9.9730  | H | 0 |
| -21.4170 | -16.2130 | 5.8350  | O | 0 | -21.0840 | -3.7730  | -5.0550 | H | 0 | -16.0060 | -4.2760 | -13.0200 | C | 0 |
| -22.9230 | -17.3330 | 6.9650  | N | 0 | -20.7850 | -4.4940  | -3.0900 | C | 0 | -14.8380 | -4.4790 | -13.3900 | O | 0 |
| -23.4100 | -17.8390 | 6.2400  | H | 0 | -20.8970 | -3.5640  | -2.5340 | H | 0 | -16.8510 | -3.5730 | -13.7520 | N | 0 |
| -23.3870 | -17.4470 | 7.8540  | H | 0 | -21.1480 | -5.3230  | -2.4810 | H | 0 | -17.7270 | -3.4210 | -13.2720 | H | 0 |
| -21.4520 | -12.2710 | 8.2690  | C | 0 | -19.3080 | -4.6900  | -3.3460 | C | 0 | -16.5550 | -3.0080 | -15.1060 | C | 0 |
| -22.5520 | -12.1180 | 8.6720  | O | 0 | -18.7270 | -4.0500  | -4.1820 | O | 0 | -16.0820 | -3.8490 | -15.6130 | H | 0 |
| -20.8880 | -11.4730 | 7.3550  | N | 0 | -18.6250 | -5.4470  | -2.5120 | N | 0 | -17.9010 | -2.8220 | -15.8710 | C | 0 |
| -19.8900 | -11.5970 | 7.2570  | H | 0 | -17.6160 | -5.4410  | -2.5500 | H | 0 | -17.7780 | -2.4320 | -16.8810 | H | 0 |
| -21.5430 | -10.3690 | 6.6120  | C | 0 | -19.0560 | -5.9480  | -1.7480 | H | 0 | -18.3770 | -3.8010 | -15.8100 | H | 0 |
| -22.6280 | -10.4570 | 6.6650  | H | 0 | -23.5910 | -3.6110  | -5.7740 | C | 0 | -18.5250 | -2.0950 | -15.3520 | H | 0 |
| -21.0680 | -9.0490  | 7.2700  | C | 0 | -23.9100 | -4.6450  | -6.3840 | O | 0 | -15.6690 | -1.7250 | -15.1520 | C | 0 |
| -21.1840 | -8.9890  | 8.3520  | H | 0 | -23.5370 | -2.3080  | -6.2710 | N | 0 | -15.2330 | -1.1890 | -16.1350 | O | 0 |
| -19.9870 | -8.9120  | 7.2520  | H | 0 | -23.2510 | -1.4850  | -5.7600 | H | 0 | -15.5200 | -1.0660 | -13.9530 | N | 0 |
| -21.6950 | -7.7770  | 6.7390  | C | 0 | -23.8700 | -2.1210  | -7.6850 | C | 0 | -15.8140 | -1.6140 | -13.1570 | H | 0 |
| -22.8470 | -7.1930  | 7.3430  | C | 0 | -24.8830 | -2.4850  | -7.8580 | H | 0 | -14.8600 | 0.2730  | -13.7250 | C | 0 |
| -23.3280 | -7.7080  | 8.1620  | H | 0 | -23.7580 | -0.6030  | -8.1200 | C | 0 | -14.3500 | 0.5350  | -14.6520 | H | 0 |
| -23.5020 | -6.1160  | 6.7060  | C | 0 | -24.2130 | 0.1090   | -7.4310 | H | 0 | -15.8840 | 1.3190  | -13.3730 | C | 0 |

|          |          |          |   |   |          |         |         |   |   |          |         |         |   |   |
|----------|----------|----------|---|---|----------|---------|---------|---|---|----------|---------|---------|---|---|
| -15.2930 | 2.2020   | -13.1260 | H | 0 | -7.3490  | -8.6130 | -5.4850 | H | 0 | -8.7200  | 0.1860  | 9.2320  | H | 0 |
| -16.7180 | 1.6790   | -14.6560 | C | 0 | -6.8360  | -7.0950 | -6.2230 | H | 0 | -10.4680 | 0.4870  | 9.7970  | H | 0 |
| -16.1740 | 1.5430   | -15.5910 | H | 0 | -6.7180  | -5.5600 | -4.1110 | C | 0 | -8.9430  | 0.7280  | 10.8540 | H | 0 |
| -17.5850 | 1.0240   | -14.7310 | H | 0 | -5.6380  | -5.6810 | -4.0300 | H | 0 | -10.4770 | -1.3160 | 11.9220 | C | 0 |
| -17.0530 | 2.7160   | -14.6600 | H | 0 | -7.0030  | -4.8490 | -4.8860 | H | 0 | -11.6650 | -1.5770 | 11.8690 | O | 0 |
| -16.7740 | 0.9540   | -12.1840 | C | 0 | -6.9020  | -4.9280 | -3.2420 | H | 0 | -9.8900  | -1.1560 | 13.1120 | N | 0 |
| -16.4200 | 0.0520   | -11.6850 | H | 0 | -9.5490  | -5.7290 | -3.4280 | C | 0 | -8.9490  | -0.8010 | 13.2060 | H | 0 |
| -16.7750 | 1.7490   | -11.4390 | H | 0 | -10.2520 | -4.7180 | -3.7220 | O | 0 | -10.4710 | -1.4690 | 14.4460 | C | 0 |
| -17.7770 | 0.6870   | -12.5170 | H | 0 | -9.2910  | -6.0440 | -2.1890 | N | 0 | -11.4930 | -1.8320 | 14.3360 | H | 0 |
| -13.7370 | 0.1940   | -12.6820 | C | 0 | -8.6400  | -6.7760 | -1.9430 | H | 0 | -9.6570  | -2.6590 | 15.0090 | C | 0 |
| -12.7730 | 0.9780   | -12.7880 | O | 0 | -9.4080  | -5.1420 | -1.0480 | C | 0 | -9.5530  | -3.4710 | 14.2890 | H | 0 |
| -13.6620 | -0.8720  | -11.8880 | N | 0 | -9.5370  | -4.1190 | -1.4010 | H | 0 | -8.6460  | -2.3530 | 15.2750 | H | 0 |
| -14.4540 | -1.4850  | -11.7590 | H | 0 | -10.6450 | -5.3310 | -0.2940 | C | 0 | -10.3720 | -3.1200 | 16.2300 | C | 0 |
| -12.4040 | -1.2120  | -11.2370 | C | 0 | -11.4520 | -5.6110 | -0.9720 | H | 0 | -11.4660 | -3.9900 | 16.1010 | C | 0 |
| -11.9330 | -0.5010  | -10.5580 | H | 0 | -10.5510 | -6.2380 | 0.3030  | H | 0 | -11.7880 | -4.3390 | 15.1310 | H | 0 |
| -12.7450 | -2.4210  | -10.3260 | C | 0 | -11.0570 | -4.2650 | 0.7350  | C | 0 | -12.0930 | -4.3280 | 17.2840 | C | 0 |
| -13.5550 | -2.1060  | -9.6690  | H | 0 | -10.7910 | -4.4010 | 1.9560  | O | 0 | -12.8930 | -5.0480 | 17.1850 | H | 0 |
| -13.0740 | -3.2050  | -11.0080 | H | 0 | -11.6580 | -3.1360 | 0.3850  | N | 0 | -11.6010 | -3.9640 | 18.5040 | C | 0 |
| -11.8310 | -2.7070  | -9.8060  | H | 0 | -12.0230 | -2.4580 | 1.0380  | H | 0 | -12.2420 | -4.5560 | 19.5410 | O | 0 |
| -11.2830 | -1.6800  | -12.2410 | C | 0 | -12.1560 | -3.1670 | -0.4930 | H | 0 | -12.6270 | -5.3620 | 19.1890 | H | 0 |
| -11.4070 | -2.3850  | -13.2220 | O | 0 | -8.1850  | -5.1280 | -0.0760 | C | 0 | -10.5210 | -3.1280 | 18.6520 | C | 0 |
| -10.0780 | -1.1330  | -12.0200 | N | 0 | -7.5350  | -6.1700 | 0.1910  | O | 0 | -10.3310 | -2.7400 | 19.6420 | H | 0 |
| -10.0560 | -0.5260  | -11.2130 | H | 0 | -7.9310  | -3.9540 | 0.5480  | N | 0 | -9.8990  | -2.6960 | 17.4790 | C | 0 |
| -9.1310  | -1.1180  | -13.1480 | C | 0 | -8.5330  | -3.1740 | 0.3240  | H | 0 | -9.0630  | -2.0120 | 17.5070 | H | 0 |
| -9.5820  | -0.8060  | -14.0900 | H | 0 | -6.7830  | -3.6950 | 1.4220  | C | 0 | -10.5730 | -0.2510 | 15.3630 | C | 0 |
| -8.1150  | 0.0200   | -12.9550 | C | 0 | -6.0450  | -4.4130 | 1.0630  | H | 0 | -9.7070  | 0.6180  | 15.3430 | O | 0 |
| -7.5090  | 0.0900   | -13.8580 | H | 0 | -6.1660  | -2.3070 | 1.2140  | C | 0 | -11.5970 | -0.2330 | 16.2260 | N | 0 |
| -8.5430  | 0.9950   | -12.7220 | H | 0 | -6.3730  | -2.1180 | 0.1610  | H | 0 | -12.2370 | -1.0140 | 16.2120 | H | 0 |
| -6.8500  | -0.3420  | -11.6400 | S | 0 | -6.6150  | -1.6020 | 1.9140  | H | 0 | -11.7400 | 0.6470  | 17.3390 | C | 0 |
| -8.3580  | -2.4360  | -13.4420 | C | 0 | -4.6870  | -2.2000 | 1.4850  | C | 0 | -10.7560 | 0.9460  | 17.6980 | H | 0 |
| -7.9310  | -2.6630  | -14.5260 | O | 0 | -4.5940  | -1.7170 | 2.4580  | H | 0 | -12.5170 | 1.8710  | 16.9250 | C | 0 |
| -8.0980  | -3.1650  | -12.3600 | N | 0 | -4.3230  | -3.2200 | 1.6130  | H | 0 | -11.9680 | 2.4960  | 16.2210 | H | 0 |
| -8.4920  | -2.8420  | -11.4610 | H | 0 | -3.9930  | -1.4930 | 0.3060  | C | 0 | -13.4750 | 1.6160  | 16.4710 | H | 0 |
| -6.9160  | -3.9740  | -12.2360 | C | 0 | -4.5330  | -0.5990 | -0.0040 | H | 0 | -12.7810 | 2.4820  | 17.7890 | H | 0 |
| -6.6210  | -4.1940  | -13.2620 | H | 0 | -3.0240  | -1.0960 | 0.6090  | H | 0 | -12.5550 | -0.1070 | 18.4600 | C | 0 |
| -5.7630  | -3.1620  | -11.6190 | C | 0 | -3.7640  | -2.4200 | -0.8230 | N | 0 | -13.0310 | -1.2110 | 18.2310 | O | 0 |
| -5.9410  | -2.8630  | -10.5860 | H | 0 | -3.0000  | -3.0810 | -0.8050 | H | 0 | -12.6770 | 0.4770  | 19.6510 | N | 0 |
| -4.8370  | -3.7170  | -11.4660 | H | 0 | -4.4030  | -2.5700 | -1.9770 | C | 0 | -12.3760 | 1.4410  | 19.6650 | H | 0 |
| -5.4870  | -1.6150  | -12.4480 | S | 0 | -5.2600  | -1.6550 | -2.4390 | N | 0 | -13.4570 | -0.1340 | 20.7810 | C | 0 |
| -7.2610  | -5.2090  | -11.3280 | C | 0 | -5.1260  | -0.7180 | -2.0850 | H | 0 | -12.9060 | -0.9720 | 21.2080 | H | 0 |
| -6.8860  | -5.3540  | -10.1660 | O | 0 | -5.7660  | -1.8770 | -3.2840 | H | 0 | -13.3400 | 0.9260  | 21.9370 | C | 0 |
| -8.0650  | -6.1380  | -11.9090 | N | 0 | -4.2520  | -3.5520 | -2.8050 | N | 0 | -12.2980 | 1.2220  | 22.0560 | H | 0 |
| -8.3340  | -6.1060  | -12.8820 | H | 0 | -3.5620  | -4.2690 | -2.6320 | H | 0 | -13.8580 | 1.8200  | 21.5900 | H | 0 |
| -8.8420  | -7.0240  | -11.1120 | C | 0 | -4.6780  | -3.5230 | -3.7200 | H | 0 | -14.0460 | 0.5300  | 23.1980 | C | 0 |
| -9.6360  | -7.3690  | -11.7740 | H | 0 | -6.9610  | -3.9720 | 2.9620  | C | 0 | -13.8240 | -0.3880 | 23.9460 | O | 0 |
| -7.9830  | -8.3530  | -10.7600 | C | 0 | -6.0370  | -4.0480 | 3.7450  | O | 0 | -14.7160 | 1.4970  | 23.7430 | N | 0 |
| -7.3280  | -8.5520  | -11.6090 | H | 0 | -8.2300  | -4.2750 | 3.3640  | N | 0 | -15.1370 | 1.2570  | 24.6290 | H | 0 |
| -7.3560  | -8.1360  | -9.8950  | H | 0 | -8.9870  | -4.1280 | 2.7120  | H | 0 | -14.6970 | 2.4260  | 23.3470 | H | 0 |
| -8.8290  | -9.5590  | -10.4440 | C | 0 | -8.6020  | -4.8480 | 4.6570  | C | 0 | -14.8330 | -0.5990 | 20.4790 | C | 0 |
| -8.3280  | -10.6370 | -9.9940  | O | 0 | -9.4460  | -5.5280 | 4.5460  | H | 0 | -15.8280 | 0.2040  | 20.5430 | O | 0 |
| -10.0480 | -9.4390  | -10.6320 | O | 0 | -7.7630  | -5.3860 | 5.0990  | H | 0 | -15.0860 | -1.8780 | 20.1630 | N | 0 |
| -9.6290  | -6.3130  | -9.9290  | C | 0 | -9.1250  | -3.8990 | 5.6320  | C | 0 | -14.3150 | -2.5260 | 20.0870 | H | 0 |
| -10.0260 | -5.1700  | -10.0240 | O | 0 | -9.5510  | -2.7840 | 5.3130  | O | 0 | -16.3840 | -2.3890 | 19.7890 | C | 0 |
| -9.9410  | -6.9470  | -8.7670  | N | 0 | -9.4190  | -4.3880 | 6.8820  | N | 0 | -16.1550 | -3.4540 | 19.7540 | H | 0 |
| -9.5670  | -7.8840  | -8.7160  | H | 0 | -9.2770  | -5.3870 | 6.9210  | H | 0 | -17.2320 | -2.2190 | 20.4520 | H | 0 |
| -11.0250 | -6.5920  | -7.8290  | C | 0 | -10.2860 | -3.8940 | 7.9880  | C | 0 | -16.8570 | -2.0800 | 18.3740 | C | 0 |
| -11.3280 | -5.5560  | -7.9800  | H | 0 | -11.1300 | -3.3310 | 7.5880  | H | 0 | -17.9520 | -2.5380 | 18.1160 | O | 0 |
| -12.2800 | -7.4100  | -8.1490  | C | 0 | -10.8290 | -5.0520 | 8.8810  | C | 0 | -16.0900 | -1.4320 | 17.5070 | N | 0 |
| -13.0700 | -6.9490  | -7.5560  | H | 0 | -10.0260 | -5.5140 | 9.4550  | H | 0 | -15.1870 | -1.1320 | 17.8460 | H | 0 |
| -12.8330 | -7.2800  | -9.5610  | C | 0 | -11.5350 | -4.6880 | 9.6270  | H | 0 | -16.3240 | -1.3190 | 16.0750 | C | 0 |
| -12.7130 | -6.2420  | -9.8710  | H | 0 | -11.4760 | -6.1490 | 8.0100  | C | 0 | -17.2010 | -1.9290 | 15.8610 | H | 0 |
| -12.2100 | -7.7640  | -10.3130 | H | 0 | -10.9360 | -6.4350 | 7.1070  | H | 0 | -16.7870 | 0.1060  | 15.7030 | C | 0 |
| -13.8380 | -7.6990  | -9.5010  | H | 0 | -11.7270 | -7.4100 | 8.8310  | C | 0 | -15.9380 | 0.7810  | 15.8150 | H | 0 |
| -12.1350 | -8.8990  | -7.8970  | C | 0 | -10.8010 | -7.9050 | 9.1250  | H | 0 | -17.0610 | 0.1580  | 14.6490 | H | 0 |
| -11.3150 | -9.2860  | -8.5020  | H | 0 | -12.3060 | -7.2030 | 9.7300  | H | 0 | -17.8180 | 0.6940  | 16.5960 | C | 0 |
| -11.9210 | -8.9500  | -6.8290  | H | 0 | -12.1390 | -8.1840 | 8.1820  | H | 0 | -18.7200 | 0.1800  | 16.9270 | H | 0 |
| -13.1200 | -9.3650  | -7.9270  | H | 0 | -12.7700 | -5.6570 | 7.4510  | C | 0 | -17.1290 | 0.8310  | 17.4300 | H | 0 |
| -10.6780 | -6.6870  | -6.2860  | C | 0 | -12.6010 | -5.0190 | 6.5830  | H | 0 | -18.1770 | 2.1310  | 16.1220 | C | 0 |
| -11.5320 | -7.0180  | -5.4830  | O | 0 | -13.4910 | -6.4210 | 7.1610  | H | 0 | -17.3370 | 2.8070  | 16.2790 | H | 0 |
| -9.3870  | -6.5800  | -5.8090  | N | 0 | -13.3140 | -4.9960 | 8.1260  | H | 0 | -18.5840 | 2.1090  | 15.1110 | H | 0 |
| -8.7380  | -6.4250  | -6.5670  | H | 0 | -9.4580  | -2.9730 | 8.8800  | C | 0 | -19.2130 | 2.6840  | 17.0100 | C | 0 |
| -8.9780  | -6.7680  | -4.3980  | C | 0 | -8.2150  | -3.0910 | 8.9750  | O | 0 | -19.4240 | 3.6520  | 16.5530 | H | 0 |
| -9.3990  | -7.6880  | -3.9920  | H | 0 | -10.1510 | -2.1480 | 9.6550  | N | 0 | -20.1280 | 2.0920  | 17.0240 | H | 0 |
| -7.4960  | -6.9010  | -4.2000  | C | 0 | -11.1510 | -2.1260 | 9.5160  | H | 0 | -18.7440 | 2.9190  | 18.4240 | N | 0 |
| -7.3600  | -7.3590  | -3.2200  | H | 0 | -9.6100  | -1.2660 | 10.6630 | C | 0 | -19.1250 | 3.7980  | 18.7450 | H | 0 |
| -6.8210  | -7.6780  | -5.3020  | C | 0 | -8.6180  | -1.6800 | 10.8410 | H | 0 | -19.1270 | 2.1830  | 18.9990 | H | 0 |
| -5.7550  | -7.8440  | -5.1500  | H | 0 | -9.4470  | 0.1980  | 10.0450 | C | 0 | -17.7380 | 2.8910  | 18.5140 | H | 0 |

|          |         |         |   |   |          |         |         |   |   |          |         |         |   |   |
|----------|---------|---------|---|---|----------|---------|---------|---|---|----------|---------|---------|---|---|
| -15.1750 | -1.9090 | 15.2490 | C | 0 | -18.0020 | -2.8980 | -1.4080 | H | 0 | -15.3320 | 3.1620  | 6.1140  | C | 0 |
| -13.9770 | -1.9160 | 15.5730 | O | 0 | -18.1420 | -2.7700 | 0.6050  | C | 0 | -15.4760 | 2.1370  | 5.7720  | H | 0 |
| -15.6200 | -2.2630 | 14.0260 | N | 0 | -19.2210 | -2.9030 | 0.5380  | H | 0 | -14.6160 | 3.6510  | 5.4530  | H | 0 |
| -16.5980 | -2.1270 | 13.8120 | H | 0 | -17.8230 | -3.8110 | 0.6670  | H | 0 | -14.8560 | 3.2210  | 7.0930  | H | 0 |
| -14.7840 | -2.7510 | 12.9910 | C | 0 | -18.0370 | -2.2360 | 1.5500  | H | 0 | -18.8340 | 2.2500  | 5.2090  | C | 0 |
| -13.7560 | -2.3940 | 13.0450 | H | 0 | -18.2880 | -0.9790 | -1.0090 | O | 0 | -19.9670 | 2.7810  | 5.3370  | O | 0 |
| -14.7670 | -4.3030 | 12.9290 | C | 0 | -18.8160 | -1.1900 | -1.7830 | H | 0 | -18.3760 | 1.1700  | 5.9020  | N | 0 |
| -14.3940 | -4.6370 | 13.8970 | H | 0 | -15.8160 | -1.5510 | -2.2310 | C | 0 | -17.4110 | 0.8740  | 5.8700  | H | 0 |
| -16.1050 | -5.0980 | 12.7740 | C | 0 | -15.6890 | -0.3390 | -2.3570 | O | 0 | -19.3660 | 0.3230  | 6.6580  | C | 0 |
| -15.9900 | -6.1740 | 12.6430 | H | 0 | -15.6870 | -2.4750 | -3.2000 | N | 0 | -20.2470 | 0.9270  | 6.8750  | H | 0 |
| -16.7790 | -4.8730 | 13.6010 | H | 0 | -15.8800 | -3.4570 | -3.0620 | H | 0 | -19.7680 | -0.9440 | 5.9070  | C | 0 |
| -16.6480 | -4.8360 | 11.8660 | H | 0 | -15.4410 | -2.1410 | -4.5780 | C | 0 | -18.9010 | -1.6040 | 5.8790  | H | 0 |
| -13.7610 | -4.7760 | 11.8390 | C | 0 | -14.4520 | -1.6950 | -4.4700 | H | 0 | -20.9850 | -1.6630 | 6.4920  | C | 0 |
| -14.3110 | -4.8240 | 10.8990 | H | 0 | -15.2520 | -3.4210 | -5.3770 | C | 0 | -20.9380 | -1.6110 | 7.5790  | H | 0 |
| -12.9550 | -4.0500 | 11.7270 | H | 0 | -14.6430 | -4.1470 | -4.8380 | H | 0 | -21.8540 | -1.1010 | 6.1480  | H | 0 |
| -13.1200 | -6.1470 | 12.1920 | C | 0 | -16.2000 | -3.9240 | -5.5670 | H | 0 | -21.0290 | -2.6980 | 6.1530  | H | 0 |
| -12.1970 | -6.2250 | 11.6170 | H | 0 | -14.5880 | -3.2090 | -6.7440 | C | 0 | -20.1380 | -0.5940 | 4.4490  | C | 0 |
| -12.9210 | -6.1630 | 13.2630 | H | 0 | -15.0320 | -2.3050 | -7.1610 | H | 0 | -20.9910 | 0.0840  | 4.4440  | H | 0 |
| -13.7880 | -6.9670 | 11.9290 | H | 0 | -13.0500 | -3.0550 | -6.4580 | C | 0 | -19.2890 | -0.1140 | 3.9610  | H | 0 |
| -15.3410 | -2.0350 | 11.7240 | C | 0 | -12.7530 | -3.9090 | -8.0630 | H | 0 | -20.5370 | -1.8500 | 3.5590  | C | 0 |
| -16.5210 | -1.7660 | 11.6140 | O | 0 | -12.5570 | -3.0530 | -7.4300 | H | 0 | -20.2080 | -1.6970 | 2.5310  | H | 0 |
| -14.4580 | -1.7580 | 10.7750 | N | 0 | -12.8540 | -2.1300 | -5.9160 | H | 0 | -20.0090 | -2.7750 | 3.7900  | H | 0 |
| -13.5140 | -1.7700 | 11.1350 | H | 0 | -14.7630 | -4.4190 | -7.7290 | C | 0 | -21.6230 | -1.9260 | 3.6010  | H | 0 |
| -14.7390 | -0.9380 | 9.5800  | C | 0 | -15.7980 | -4.4950 | -8.0630 | H | 0 | -18.8510 | -0.0430 | 8.0180  | C | 0 |
| -15.8130 | -0.7880 | 9.6920  | H | 0 | -14.1070 | -4.3260 | -8.5950 | H | 0 | -17.6510 | -0.4280 | 8.1370  | O | 0 |
| -14.2220 | 0.4650  | 9.6780  | C | 0 | -14.3630 | -5.3290 | -7.2820 | H | 0 | -19.6270 | 0.2960  | 9.0740  | N | 0 |
| -13.1390 | 0.5780  | 9.6450  | H | 0 | -16.3180 | -0.9450 | -5.1660 | C | 0 | -20.5680 | 0.6470  | 8.9670  | H | 0 |
| -14.5990 | 1.0970  | 8.8730  | H | 0 | -15.8760 | -0.0210 | -5.8100 | O | 0 | -19.2290 | -0.0460 | 10.4410 | C | 0 |
| -14.6430 | 1.1400  | 10.9690 | C | 0 | -17.6370 | -1.1770 | -4.8340 | N | 0 | -18.1560 | -0.1890 | 10.5720 | H | 0 |
| -15.8010 | 1.9070  | 10.9680 | C | 0 | -17.8800 | -1.9960 | -4.2950 | H | 0 | -19.4530 | 1.1550  | 11.3750 | C | 0 |
| -16.3050 | 2.0960  | 10.0320 | H | 0 | -18.6760 | -0.2760 | -5.3200 | C | 0 | -19.1390 | 0.9590  | 12.4000 | H | 0 |
| -16.2460 | 2.6100  | 12.0760 | C | 0 | -18.3510 | 0.0900  | -6.2940 | H | 0 | -19.0450 | 2.0790  | 10.9650 | H | 0 |
| -17.1460 | 3.2030  | 12.0100 | H | 0 | -20.0340 | -1.0080 | -5.4140 | C | 0 | -20.5120 | 1.4060  | 11.4410 | H | 0 |
| -15.5050 | 2.5120  | 13.2880 | C | 0 | -20.6870 | -0.5270 | -6.1420 | H | 0 | -20.0340 | -1.2520 | 10.9670 | C | 0 |
| -15.8650 | 3.1730  | 14.0630 | H | 0 | -19.8140 | -2.0250 | -5.7410 | H | 0 | -21.2770 | -1.1550 | 11.2240 | O | 0 |
| -14.3600 | 1.7990  | 13.3550 | C | 0 | -20.7680 | -0.9440 | -4.0330 | C | 0 | -19.3580 | -2.3600 | 11.3580 | N | 0 |
| -13.7520 | 1.6290  | 14.2310 | H | 0 | -20.1040 | -1.1420 | -2.9790 | O | 0 | -18.3660 | -2.3280 | 11.5420 | H | 0 |
| -13.9090 | 1.0800  | 12.1910 | C | 0 | -21.9400 | -0.5960 | -3.9540 | O | 0 | -20.0120 | -3.5600 | 11.8480 | C | 0 |
| -12.9960 | 0.5160  | 12.3130 | H | 0 | -18.7910 | 1.0570  | -4.4840 | C | 0 | -21.0910 | -3.4260 | 11.7690 | H | 0 |
| -14.2520 | -1.6690 | 8.2980  | C | 0 | -19.6000 | 1.8870  | -4.8400 | O | 0 | -19.6140 | -4.8820 | 11.0930 | C | 0 |
| -13.1490 | -2.3520 | 8.3730  | O | 0 | -17.8950 | 1.3130  | -3.5430 | N | 0 | -18.5930 | -5.0940 | 11.4110 | H | 0 |
| -15.0290 | -1.5490 | 7.2240  | N | 0 | -17.2190 | 0.6040  | -3.2990 | H | 0 | -20.1370 | -5.7670 | 11.4570 | H | 0 |
| -15.9350 | -1.1210 | 7.3530  | H | 0 | -17.6140 | 2.6600  | -3.0500 | C | 0 | -19.8330 | -4.7470 | 9.5630  | C | 0 |
| -14.6850 | -2.0400 | 5.9200  | C | 0 | -16.5300 | 2.7190  | -2.9450 | H | 0 | -19.3220 | -3.8530 | 9.2080  | H | 0 |
| -13.6120 | -2.2300 | 5.9220  | H | 0 | -17.9890 | 3.3980  | -3.7600 | H | 0 | -19.1750 | -5.9600 | 8.9890  | C | 0 |
| -15.3870 | -3.3960 | 5.8240  | C | 0 | -18.1880 | 3.0720  | -1.6900 | C | 0 | -18.0900 | -5.8560 | 8.9890  | H | 0 |
| -14.9470 | -3.9550 | 4.9980  | H | 0 | -18.3630 | 4.2530  | -1.4730 | O | 0 | -19.4230 | -6.8910 | 9.4990  | H | 0 |
| -15.1270 | -3.9680 | 6.7140  | H | 0 | -18.3630 | 2.1370  | -0.7350 | N | 0 | -19.4410 | -6.0230 | 7.9330  | H | 0 |
| -16.8790 | -3.2430 | 5.6070  | C | 0 | -18.2480 | 1.1930  | -1.0760 | H | 0 | -21.3210 | -4.6110 | 9.1790  | C | 0 |
| -17.3060 | -2.8130 | 6.5130  | H | 0 | -19.0040 | 2.3170  | 0.5780  | C | 0 | -21.6910 | -5.5720 | 9.5340  | H | 0 |
| -17.0400 | -2.6150 | 4.7320  | H | 0 | -19.4500 | 3.3090  | 0.5130  | H | 0 | -21.7880 | -3.7580 | 9.6720  | H | 0 |
| -17.7350 | -4.7270 | 5.1920  | S | 0 | -20.1100 | 1.2320  | 0.7950  | C | 0 | -21.4900 | -4.5400 | 8.1040  | H | 0 |
| -17.0980 | -5.3370 | 3.6190  | C | 0 | -19.6040 | 0.2860  | 0.9880  | H | 0 | -19.8350 | -3.7020 | 13.3920 | C | 0 |
| -17.7290 | -6.1400 | 3.2380  | H | 0 | -20.5570 | 1.3640  | 1.7810  | H | 0 | -18.7570 | -3.3910 | 13.9170 | O | 0 |
| -17.0940 | -4.4850 | 2.9390  | H | 0 | -21.2100 | 1.1300  | -0.2830 | C | 0 | -20.7820 | -4.3470 | 14.0740 | N | 0 |
| -16.0710 | -5.6920 | 3.7150  | H | 0 | -21.8980 | 1.9760  | -0.2710 | H | 0 | -21.6160 | -4.6550 | 13.5950 | H | 0 |
| -15.0700 | -1.1370 | 4.7260  | C | 0 | -20.7210 | 1.0330  | -1.2530 | H | 0 | -20.5690 | -4.6110 | 15.5200 | C | 0 |
| -15.9510 | -0.2640 | 4.8910  | O | 0 | -22.2000 | -0.0310 | -0.1760 | C | 0 | -20.1880 | -3.7410 | 16.0550 | H | 0 |
| -14.5250 | -1.4580 | 3.6300  | N | 0 | -23.0130 | -0.0960 | 0.7040  | O | 0 | -21.9660 | -4.9930 | 16.0050 | C | 0 |
| -13.8330 | -2.1930 | 3.6650  | H | 0 | -22.2180 | -0.9530 | -1.1400 | N | 0 | -22.6800 | -4.1770 | 15.8880 | H | 0 |
| -14.7280 | -0.7710 | 2.3860  | C | 0 | -22.9300 | -1.6660 | -1.0720 | H | 0 | -22.2720 | -5.7590 | 15.2920 | H | 0 |
| -15.6040 | -0.1250 | 2.4370  | H | 0 | -21.5780 | -0.9830 | -1.9200 | H | 0 | -22.0980 | -5.6190 | 17.4240 | C | 0 |
| -13.3940 | 0.0000  | 1.9120  | C | 0 | -17.9700 | 2.3610  | 1.7210  | C | 0 | -21.0540 | -5.5800 | 18.1120 | O | 0 |
| -13.5390 | 0.3010  | 0.8740  | H | 0 | -16.8540 | 1.7600  | 1.6780  | O | 0 | -23.1240 | -6.2250 | 17.6640 | O | 0 |
| -13.0970 | 1.3520  | 2.6890  | C | 0 | -18.3100 | 3.0530  | 2.8180  | N | 0 | -19.5500 | -5.7700 | 15.6620 | C | 0 |
| -12.0880 | 1.6520  | 2.4080  | H | 0 | -19.1420 | 3.6250  | 2.8410  | H | 0 | -19.9180 | -6.8740 | 15.2850 | O | 0 |
| -13.9310 | 2.0310  | 2.5120  | H | 0 | -17.7830 | 2.8250  | 4.1850  | C | 0 | -18.4260 | -5.5110 | 16.3570 | N | 0 |
| -13.0560 | 1.2280  | 3.7710  | H | 0 | -16.9650 | 2.1210  | 4.0270  | H | 0 | -18.3110 | -4.5550 | 16.6630 | H | 0 |
| -12.2120 | -0.7190 | 1.9170  | O | 0 | -17.1050 | 4.0970  | 4.6530  | C | 0 | -17.4740 | -6.5670 | 16.7230 | C | 0 |
| -11.5170 | -0.1340 | 1.6080  | H | 0 | -16.3580 | 4.4420  | 3.9390  | H | 0 | -17.0170 | -6.9700 | 15.8190 | H | 0 |
| -15.0540 | -1.7580 | 1.3050  | C | 0 | -18.0150 | 5.3940  | 4.6640  | C | 0 | -16.2630 | -5.8680 | 17.4020 | C | 0 |
| -15.0150 | -2.9930 | 1.4650  | O | 0 | -18.9700 | 5.1130  | 5.1070  | H | 0 | -15.9270 | -5.0230 | 16.8010 | H | 0 |
| -15.6330 | -1.2500 | 0.2170  | N | 0 | -17.5700 | 6.2190  | 5.2210  | H | 0 | -16.3950 | -5.4360 | 18.3940 | H | 0 |
| -15.6930 | -0.2470 | 0.1180  | H | 0 | -18.1220 | 5.6970  | 3.6220  | H | 0 | -15.3640 | -6.4840 | 17.4400 | H | 0 |
| -16.2230 | -2.0590 | -0.7810 | C | 0 | -16.5740 | 4.0560  | 6.0950  | C | 0 | -18.0900 | -7.7900 | 17.4970 | C | 0 |
| -15.7420 | -3.0350 | -0.7130 | H | 0 | -16.2170 | 5.0380  | 6.4040  | H | 0 | -17.4100 | -8.8630 | 17.4740 | O | 0 |
| -17.6620 | -2.1690 | -0.6720 | C | 0 | -17.3190 | 3.6610  | 6.7860  | H | 0 | -19.3350 | -7.6780 | 18.0670 | N | 0 |

|          |          |         |   |   |          |         |         |   |   |          |         |          |   |   |
|----------|----------|---------|---|---|----------|---------|---------|---|---|----------|---------|----------|---|---|
| -19.8440 | -6.8110  | 17.9630 | H | 0 | -22.6520 | 1.3220  | 14.5870 | H | 0 | -23.0800 | 6.5510  | 1.3640   | H | 0 |
| -19.9190 | -8.7900  | 18.7960 | C | 0 | -22.0020 | -0.5500 | 15.0500 | C | 0 | -21.6320 | 5.8500  | 0.0230   | C | 0 |
| -19.0660 | -9.3990  | 19.0960 | H | 0 | -22.4140 | -1.5470 | 14.8910 | H | 0 | -20.8150 | 5.1370  | 0.1340   | H | 0 |
| -20.6080 | -8.2650  | 20.0480 | C | 0 | -20.4950 | -0.6740 | 15.0070 | C | 0 | -22.5830 | 5.3590  | -0.9870  | C | 0 |
| -19.9190 | -7.7020  | 20.6780 | H | 0 | -20.1450 | -1.4560 | 15.6820 | H | 0 | -23.0900 | 4.4430  | -0.6810  | H | 0 |
| -21.3040 | -7.4730  | 19.7690 | H | 0 | -20.2190 | -0.9210 | 13.9810 | H | 0 | -23.2820 | 6.1840  | -1.1210  | H | 0 |
| -21.2980 | -9.3800  | 20.7390 | C | 0 | -20.0240 | 0.2620  | 15.3040 | H | 0 | -21.9490 | 5.0850  | -2.3800  | C | 0 |
| -20.8920 | -10.4920 | 20.8650 | O | 0 | -22.5330 | -0.2310 | 16.4540 | C | 0 | -21.6290 | 6.0520  | -2.7660  | H | 0 |
| -22.4530 | -9.0540  | 21.2690 | N | 0 | -21.8400 | 0.4660  | 16.9260 | H | 0 | -21.0010 | 4.5530  | -2.3030  | H | 0 |
| -22.8490 | -9.8200  | 21.7950 | H | 0 | -23.5200 | 0.2200  | 16.3570 | H | 0 | -22.6940 | 4.2370  | -3.4120  | C | 0 |
| -22.8940 | -8.1480  | 21.2050 | H | 0 | -22.5590 | -1.1420 | 17.0530 | H | 0 | -23.7590 | 4.4680  | -3.3790  | H | 0 |
| -20.8940 | -9.5830  | 17.8850 | C | 0 | -24.2040 | 1.3640  | 12.4690 | C | 0 | -22.2620 | 4.5840  | -4.3500  | H | 0 |
| -20.8360 | -10.8350 | 17.9840 | O | 0 | -24.8520 | 2.2630  | 12.9380 | O | 0 | -22.3330 | 2.7400  | -3.2690  | C | 0 |
| -21.7840 | -9.0630  | 17.0620 | N | 0 | -23.6330 | 1.3760  | 11.2210 | N | 0 | -21.2460 | 2.6830  | -3.3220  | H | 0 |
| -21.7770 | -8.0610  | 16.9340 | H | 0 | -23.1580 | 0.5470  | 10.8930 | H | 0 | -22.6630 | 2.4010  | -2.2870  | H | 0 |
| -22.8400 | -9.8220  | 16.3580 | C | 0 | -23.9880 | 2.3690  | 10.1690 | C | 0 | -22.9790 | 1.9290  | -4.3860  | N | 0 |
| -22.8240 | -10.9050 | 16.4810 | H | 0 | -25.0520 | 2.2320  | 9.9750  | H | 0 | -23.9200 | 1.6460  | -4.1530  | H | 0 |
| -24.2510 | -9.3890  | 16.8310 | C | 0 | -23.7020 | 3.7760  | 10.5950 | C | 0 | -22.9260 | 2.3840  | -5.2870  | H | 0 |
| -25.0020 | -9.9860  | 16.3140 | H | 0 | -24.0410 | 4.4170  | 9.7810  | H | 0 | -22.5220 | 1.0320  | -4.4750  | H | 0 |
| -24.3050 | -9.6700  | 18.3410 | C | 0 | -24.4410 | 4.0420  | 11.3510 | H | 0 | -20.8300 | 7.1010  | -0.3440  | C | 0 |
| -23.8390 | -10.6290 | 18.5690 | H | 0 | -22.3800 | 4.1360  | 11.0800 | C | 0 | -21.2250 | 8.2270  | -0.0850  | O | 0 |
| -23.9390 | -8.9240  | 19.0460 | H | 0 | -21.8770 | 4.1360  | 12.3200 | C | 0 | -19.7220 | 6.8340  | -1.0020  | N | 0 |
| -25.3340 | -9.9120  | 18.6050 | H | 0 | -22.5600 | 3.9270  | 13.1300 | H | 0 | -19.3940 | 5.8850  | -1.1090  | H | 0 |
| -24.6180 | -8.0730  | 16.6340 | O | 0 | -20.5860 | 4.4980  | 12.3560 | N | 0 | -18.6870 | 7.8310  | -1.0600  | C | 0 |
| -24.0630 | -7.4580  | 17.1190 | H | 0 | -20.0300 | 4.4730  | 13.1980 | H | 0 | -19.0880 | 8.8190  | -0.8370  | H | 0 |
| -22.7720 | -9.6280  | 14.8410 | C | 0 | -20.1510 | 4.7360  | 11.1590 | C | 0 | -17.6910 | 7.6130  | 0.0110   | C | 0 |
| -23.5400 | -10.2140 | 14.0370 | O | 0 | -18.9590 | 5.2540  | 10.6930 | C | 0 | -18.0280 | 7.6980  | 1.0440   | H | 0 |
| -21.8520 | -8.7620  | 14.4170 | N | 0 | -18.2720 | 5.5250  | 11.4820 | H | 0 | -17.3890 | 6.5740  | -0.1190  | H | 0 |
| -21.2180 | -8.3840  | 15.1070 | H | 0 | -18.7140 | 5.5100  | 9.3900  | C | 0 | -16.4010 | 8.3730  | -0.1130  | C | 0 |
| -21.7620 | -8.5060  | 12.9520 | C | 0 | -17.8020 | 6.0490  | 9.1770  | H | 0 | -16.1730 | 9.7050  | 0.3720   | N | 0 |
| -20.9090 | -7.9000  | 12.6490 | H | 0 | -19.7510 | 5.3590  | 8.4520  | C | 0 | -14.8630 | 9.9370  | 0.1570   | C | 0 |
| -21.8590 | -9.4420  | 12.4020 | H | 0 | -19.6160 | 5.6590  | 7.4230  | H | 0 | -14.3540 | 10.8530 | 0.4200   | H | 0 |
| -22.9190 | -7.7380  | 12.3730 | C | 0 | -21.0010 | 4.8060  | 8.8300  | C | 0 | -14.2130 | 8.8520  | -0.2340  | N | 0 |
| -23.1640 | -7.7240  | 11.1170 | O | 0 | -21.7080 | 4.6780  | 8.0240  | H | 0 | -13.2110 | 8.7230  | -0.2440  | H | 0 |
| -23.8050 | -7.1160  | 13.1570 | N | 0 | -21.2400 | 4.5670  | 10.2420 | C | 0 | -15.1320 | 7.8820  | -0.4270  | C | 0 |
| -23.7630 | -7.2040  | 14.1620 | H | 0 | -23.3380 | 2.1920  | 8.8150  | C | 0 | -14.9660 | 6.8950  | -0.8310  | H | 0 |
| -24.9450 | -6.3330  | 12.5840 | C | 0 | -22.3460 | 1.4420  | 8.8070  | O | 0 | -18.1060 | 8.0420  | -2.4710  | C | 0 |
| -25.2970 | -6.7790  | 11.6530 | H | 0 | -23.8940 | 2.7350  | 7.6920  | N | 0 | -17.3320 | 8.9610  | -2.7330  | O | 0 |
| -26.0790 | -6.3120  | 13.5820 | C | 0 | -24.8190 | 3.1360  | 7.7420  | H | 0 | -18.4440 | 7.1260  | -3.3900  | N | 0 |
| -25.6100 | -6.2570  | 14.5640 | H | 0 | -23.1830 | 2.6700  | 6.4050  | C | 0 | -19.2810 | 6.5880  | -3.2130  | H | 0 |
| -26.8000 | -5.5070  | 13.4420 | H | 0 | -22.1060 | 2.5650  | 6.5410  | H | 0 | -17.8050 | 7.0370  | -4.6990  | C | 0 |
| -26.9080 | -7.5750  | 13.5200 | C | 0 | -23.5820 | 1.3600  | 5.7100  | C | 0 | -17.5590 | 8.0520  | -5.0120  | H | 0 |
| -27.3380 | -7.7270  | 12.5300 | H | 0 | -22.9420 | 1.3500  | 4.8270  | H | 0 | -16.5290 | 6.3100  | -4.7000  | C | 0 |
| -26.2610 | -8.4370  | 13.6800 | H | 0 | -23.3250 | 0.5440  | 6.3850  | H | 0 | -15.8430 | 6.6990  | -3.9490  | H | 0 |
| -28.0450 | -7.5390  | 14.4870 | C | 0 | -24.9980 | 1.2220  | 5.1400  | C | 0 | -16.5730 | 5.2850  | -4.3320  | H | 0 |
| -27.7890 | -7.1820  | 15.4850 | H | 0 | -25.7110 | 1.5320  | 5.9040  | H | 0 | -16.1100 | 6.2890  | -5.7070  | H | 0 |
| -28.7320 | -6.8080  | 14.0590 | H | 0 | -25.0720 | 1.9660  | 4.3460  | H | 0 | -18.8460 | 6.4170  | -5.6490  | C | 0 |
| -28.5810 | -8.9680  | 14.5850 | C | 0 | -25.3490 | -0.2260 | 4.7130  | C | 0 | -19.6120 | 5.5690  | -5.2220  | O | 0 |
| -28.7920 | -9.1860  | 13.5380 | H | 0 | -24.7970 | -0.4180 | 3.7930  | H | 0 | -18.7050 | 6.6440  | -6.9660  | N | 0 |
| -27.9000 | -9.6910  | 15.0340 | H | 0 | -25.0370 | -0.8590 | 5.5440  | H | 0 | -18.1840 | 7.4840  | -7.1760  | H | 0 |
| -29.8370 | -8.8470  | 15.3320 | N | 0 | -26.8470 | -0.3850 | 4.5220  | C | 0 | -19.6640 | 6.3080  | -8.0280  | C | 0 |
| -30.3450 | -8.1140  | 14.8570 | H | 0 | -27.3110 | 0.1410  | 5.3570  | H | 0 | -20.5040 | 5.7850  | -7.5720  | H | 0 |
| -30.4340 | -9.6610  | 15.3670 | H | 0 | -27.0690 | 0.0320  | 3.5400  | H | 0 | -20.4030 | 7.5070  | -8.4710  | C | 0 |
| -29.5580 | -8.5440  | 16.2540 | H | 0 | -27.2150 | -1.8180 | 4.5620  | N | 0 | -21.0160 | 7.9020  | -7.6610  | H | 0 |
| -24.4860 | -4.9150  | 12.3200 | C | 0 | -28.2040 | -1.9670 | 4.4280  | H | 0 | -19.6390 | 8.2320  | -8.7510  | H | 0 |
| -23.5520 | -4.4460  | 12.9050 | O | 0 | -26.8070 | -2.3480 | 3.8050  | H | 0 | -21.3840 | 7.2070  | -9.6140  | C | 0 |
| -25.0640 | -4.1850  | 11.3900 | N | 0 | -27.0800 | -2.2690 | 5.4560  | H | 0 | -22.0150 | 6.1370  | -9.5060  | O | 0 |
| -25.9220 | -4.6060  | 11.0640 | H | 0 | -23.4090 | 3.8440  | 5.4620  | C | 0 | -21.7120 | 8.0980  | -10.4580 | O | 0 |
| -24.5540 | -2.8550  | 10.9410 | C | 0 | -24.5160 | 4.4850  | 5.5430  | O | 0 | -19.1630 | 5.4480  | -9.1540  | C | 0 |
| -23.5620 | -2.9780  | 10.5060 | H | 0 | -22.5490 | 4.1670  | 4.5180  | N | 0 | -18.3670 | 5.9420  | -10.0080 | O | 0 |
| -25.4770 | -2.4770  | 9.7390  | C | 0 | -21.6790 | 3.6550  | 4.5060  | H | 0 | -19.6880 | 4.2360  | -9.2610  | N | 0 |
| -26.5110 | -2.6910  | 10.0080 | H | 0 | -22.6460 | 5.3800  | 3.6750  | C | 0 | -20.2920 | 3.8910  | -8.5280  | H | 0 |
| -25.3980 | -1.4810  | 9.3050  | H | 0 | -23.6810 | 5.6130  | 3.4250  | H | 0 | -19.2270 | 3.2980  | -10.2840 | C | 0 |
| -25.2760 | -3.4490  | 8.5160  | C | 0 | -22.1330 | 6.5970  | 4.4770  | C | 0 | -18.1390 | 3.3520  | -10.2680 | H | 0 |
| -24.2130 | -3.3770  | 8.2830  | H | 0 | -22.6370 | 6.6140  | 5.4440  | H | 0 | -19.7990 | 1.8530  | -9.9870  | C | 0 |
| -25.6200 | -4.3810  | 8.9640  | H | 0 | -21.0580 | 6.4550  | 4.5940  | H | 0 | -19.5800 | 1.2270  | -10.8520 | H | 0 |
| -26.1310 | -3.1180  | 7.3190  | C | 0 | -22.4270 | 7.9620  | 3.8900  | C | 0 | -19.0190 | 1.3250  | -8.7680  | C | 0 |
| -25.6610 | -3.3200  | 6.2070  | O | 0 | -21.9050 | 8.7340  | 4.4560  | H | 0 | -19.0930 | 2.0850  | -7.9890  | H | 0 |
| -27.2860 | -2.6490  | 7.4520  | O | 0 | -21.8250 | 8.0060  | 2.9820  | H | 0 | -19.4200 | 0.3970  | -8.3600  | H | 0 |
| -24.8070 | -1.8090  | 12.0240 | C | 0 | -24.0720 | 8.5030  | 3.6700  | S | 0 | -17.9320 | 1.2550  | -8.7990  | H | 0 |
| -25.9660 | -1.4970  | 12.2970 | O | 0 | -24.4640 | 9.2230  | 5.2380  | C | 0 | -21.3160 | 1.8080  | -9.7830  | C | 0 |
| -23.8100 | -1.1270  | 12.6220 | N | 0 | -24.0180 | 10.2120 | 5.3470  | H | 0 | -21.7900 | 2.1430  | -10.7060 | H | 0 |
| -22.9270 | -1.5320  | 12.3440 | H | 0 | -25.5400 | 9.3910  | 5.2960  | H | 0 | -21.7630 | 0.8150  | -9.7340  | H | 0 |
| -23.8670 | 0.1620   | 13.3380 | C | 0 | -24.1140 | 8.6240  | 6.0780  | H | 0 | -21.7190 | 2.3660  | -8.9380  | H | 0 |
| -24.6710 | 0.1040   | 14.0720 | H | 0 | -21.8530 | 5.2470  | 2.4010  | C | 0 | -19.6220 | 3.8580  | -11.6190 | C | 0 |
| -22.5310 | 0.4400   | 13.9580 | C | 0 | -20.7730 | 4.7030  | 2.4740  | O | 0 | -18.8640 | 3.7730  | -12.6150 | O | 0 |
| -21.7410 | 0.7900   | 13.2940 | H | 0 | -22.2790 | 5.9380  | 1.3080  | N | 0 | -20.7040 | 4.6550  | -11.7340 | N | 0 |

|          |         |          |   |   |          |         |         |   |   |          |         |         |   |   |
|----------|---------|----------|---|---|----------|---------|---------|---|---|----------|---------|---------|---|---|
| -21.1350 | 4.9670  | -10.8760 | H | 0 | -12.0260 | 2.0640  | -1.0020 | C | 0 | -9.1470  | 4.6770  | 11.1410 | N | 0 |
| -21.2690 | 5.3170  | -12.9110 | C | 0 | -12.0840 | 1.0370  | -0.6400 | H | 0 | -8.5390  | 3.8810  | 11.2690 | H | 0 |
| -21.3370 | 4.5750  | -13.7070 | H | 0 | -11.0220 | 2.3910  | -1.2720 | H | 0 | -9.6750  | 5.2920  | 12.3500 | C | 0 |
| -22.6750 | 5.9620  | -12.6600 | C | 0 | -12.3220 | 2.4670  | -0.0340 | H | 0 | -10.6660 | 5.6740  | 12.1020 | H | 0 |
| -22.6030 | 6.9010  | -12.1100 | H | 0 | -13.5470 | 3.6000  | -2.3690 | C | 0 | -10.0220 | 4.3240  | 13.4650 | C | 0 |
| -23.5300 | 6.2230  | -13.9190 | C | 0 | -12.8510 | 4.2940  | -2.8400 | H | 0 | -9.1060  | 3.8120  | 13.7590 | H | 0 |
| -23.0360 | 6.9260  | -14.5890 | H | 0 | -14.3740 | 3.4880  | -3.0690 | H | 0 | -10.6940 | 5.0560  | 14.6830 | C | 0 |
| -23.8810 | 5.2990  | -14.3790 | H | 0 | -14.1830 | 4.3100  | -1.1640 | C | 0 | -11.2990 | 4.3090  | 15.1960 | H | 0 |
| -24.3980 | 6.7630  | -13.5410 | H | 0 | -15.0010 | 4.9530  | -1.4880 | H | 0 | -9.9680  | 5.4080  | 15.4170 | H | 0 |
| -23.4610 | 5.1330  | -11.8850 | O | 0 | -14.6860 | 3.6370  | -0.4710 | H | 0 | -11.3670 | 5.8670  | 14.4050 | H | 0 |
| -23.2170 | 5.4030  | -10.9970 | H | 0 | -13.3910 | 4.8490  | -0.6430 | H | 0 | -10.9290 | 3.1700  | 12.9450 | C | 0 |
| -20.3650 | 6.3770  | -13.4350 | C | 0 | -11.6960 | 0.2150  | -3.3930 | C | 0 | -11.9610 | 3.5220  | 12.9330 | H | 0 |
| -20.1930 | 6.3760  | -14.6690 | O | 0 | -12.4620 | -0.7380 | -3.1580 | O | 0 | -10.4990 | 2.7920  | 12.0180 | H | 0 |
| -19.6820 | 7.1960  | -12.5980 | N | 0 | -10.4250 | 0.0990  | -3.5200 | N | 0 | -10.7550 | 2.3490  | 13.6410 | H | 0 |
| -19.8650 | 7.1400  | -11.6060 | H | 0 | -9.9200  | 0.8430  | -3.9790 | H | 0 | -8.7010  | 6.2790  | 12.8940 | C | 0 |
| -18.5480 | 8.0420  | -12.9970 | C | 0 | -9.6870  | -1.1340 | -3.1030 | C | 0 | -7.5610  | 5.9430  | 13.0810 | O | 0 |
| -18.7800 | 8.4830  | -13.9670 | H | 0 | -10.4010 | -1.9530 | -3.0230 | H | 0 | -9.2720  | 7.4540  | 13.1700 | N | 0 |
| -18.2720 | 9.1530  | -11.9510 | C | 0 | -8.7450  | -1.6260 | -4.1960 | C | 0 | -10.2730 | 7.5160  | 13.0520 | H | 0 |
| -18.1230 | 8.7080  | -10.9670 | H | 0 | -8.0730  | -2.3370 | -3.7150 | H | 0 | -8.5340  | 8.5130  | 13.8020 | C | 0 |
| -17.3290 | 9.6330  | -12.2170 | H | 0 | -9.4150  | -2.1560 | -5.4310 | C | 0 | -7.6040  | 8.2400  | 14.2990 | H | 0 |
| -19.4670 | 10.1210 | -11.8370 | C | 0 | -8.7130  | -2.8300 | -5.9210 | H | 0 | -8.1230  | 9.5120  | 12.6620 | C | 0 |
| -19.6760 | 10.6400 | -12.7730 | H | 0 | -10.2300 | -2.8190 | -5.1410 | H | 0 | -9.0230  | 9.6420  | 12.0610 | H | 0 |
| -20.3820 | 9.6480  | -11.4810 | H | 0 | -9.7210  | -1.3190 | -6.0580 | H | 0 | -7.6500  | 10.8440 | 13.1410 | C | 0 |
| -19.1710 | 11.3220 | -10.9390 | C | 0 | -7.9410  | -0.4850 | -4.4930 | O | 0 | -8.4560  | 11.4350 | 13.5780 | H | 0 |
| -20.0030 | 12.0220 | -10.8630 | H | 0 | -7.7920  | -0.4440 | -5.4400 | H | 0 | -6.9060  | 10.9040 | 13.9360 | H | 0 |
| -18.8950 | 10.9830 | -9.9410  | H | 0 | -8.9460  | -0.8780 | -1.8130 | C | 0 | -7.2010  | 11.3540 | 12.2890 | H | 0 |
| -17.9640 | 12.1340 | -11.5040 | C | 0 | -8.7270  | -1.8630 | -1.0840 | O | 0 | -7.0820  | 8.9030  | 11.8070 | C | 0 |
| -17.0690 | 11.5270 | -11.3650 | H | 0 | -8.5260  | 0.3810  | -1.5200 | N | 0 | -6.8430  | 9.6980  | 11.1010 | H | 0 |
| -17.9650 | 12.1780 | -12.5930 | H | 0 | -8.8290  | 1.1390  | -2.1160 | H | 0 | -6.2230  | 8.6420  | 12.4250 | H | 0 |
| -17.9210 | 13.5130 | -10.9090 | N | 0 | -7.9260  | 0.7710  | -0.2070 | C | 0 | -7.5180  | 8.0410  | 11.3010 | H | 0 |
| -17.8880 | 13.5450 | -9.9000  | H | 0 | -6.9740  | 0.3360  | 0.0960  | H | 0 | -9.4490  | 9.1310  | 14.8310 | C | 0 |
| -17.1750 | 14.0110 | -11.3720 | H | 0 | -7.7350  | 1.8410  | -0.2890 | H | 0 | -10.5150 | 9.7210  | 14.4570 | O | 0 |
| -18.7780 | 13.9730 | -11.1840 | H | 0 | -8.8070  | 0.5780  | 1.0260  | C | 0 | -9.1400  | 9.0470  | 16.1410 | N | 0 |
| -17.2450 | 7.2860  | -13.3210 | C | 0 | -10.0260 | 0.5030  | 0.9610  | O | 0 | -8.2850  | 8.5670  | 16.3840 | H | 0 |
| -16.3870 | 7.7800  | -14.1590 | O | 0 | -8.1190  | 0.4980  | 2.1820  | N | 0 | -9.7860  | 9.6150  | 17.2690 | C | 0 |
| -17.1060 | 6.1380  | -12.6130 | N | 0 | -7.1240  | 0.6360  | 2.0820  | H | 0 | -9.3620  | 9.0800  | 18.1190 | H | 0 |
| -17.8020 | 5.8090  | -11.9600 | H | 0 | -8.6230  | 0.2440  | 3.5270  | C | 0 | -9.5870  | 11.1870 | 17.3400 | C | 0 |
| -16.0180 | 5.1920  | -12.9280 | C | 0 | -9.3850  | -0.5110 | 3.3350  | H | 0 | -9.9680  | 11.5460 | 16.3830 | H | 0 |
| -16.3150 | 4.1640  | -13.1360 | H | 0 | -7.5400  | -0.2850 | 4.4230  | C | 0 | -10.1350 | 11.6810 | 18.1420 | H | 0 |
| -15.4780 | 5.4580  | -13.8360 | H | 0 | -6.7820  | 0.4890  | 4.5430  | H | 0 | -8.0430  | 11.5440 | 17.4650 | C | 0 |
| -15.1240 | 5.0720  | -11.6920 | C | 0 | -8.0550  | -0.5190 | 5.3550  | H | 0 | -7.6450  | 11.0140 | 18.3300 | H | 0 |
| -13.9670 | 4.7030  | -11.8610 | O | 0 | -7.0500  | -1.2160 | 4.1400  | H | 0 | -7.5150  | 11.1140 | 16.6140 | H | 0 |
| -15.6390 | 5.3830  | -10.4880 | N | 0 | -9.2910  | 1.4720  | 4.2100  | C | 0 | -7.7860  | 13.0820 | 17.6130 | C | 0 |
| -16.6300 | 5.5770  | -10.4780 | H | 0 | -9.0620  | 2.5760  | 3.7020  | O | 0 | -8.4180  | 13.2550 | 18.4840 | H | 0 |
| -14.8030 | 5.3700  | -9.2810  | C | 0 | -10.0680 | 1.3380  | 5.3660  | N | 0 | -6.7410  | 13.1990 | 17.9000 | H | 0 |
| -13.7520 | 5.4530  | -9.5590  | H | 0 | -10.6240 | 0.1050  | 5.8410  | C | 0 | -8.2940  | 13.9690 | 16.3940 | C | 0 |
| -15.3480 | 6.4740  | -8.3330  | C | 0 | -10.0330 | -0.5550 | 6.4760  | H | 0 | -7.9830  | 13.5870 | 15.4220 | H | 0 |
| -16.2580 | 6.0910  | -7.8730  | H | 0 | -10.9550 | -0.5220 | 5.0130  | H | 0 | -9.3820  | 13.9410 | 16.3400 | H | 0 |
| -14.5890 | 6.5180  | -7.5520  | H | 0 | -11.8640 | 0.5110  | 6.6240  | C | 0 | -7.7680  | 15.3370 | 16.6300 | N | 0 |
| -15.5970 | 7.8890  | -9.0050  | C | 0 | -12.1660 | -0.2140 | 7.3800  | H | 0 | -8.3620  | 15.9400 | 16.0800 | H | 0 |
| -14.6750 | 8.1260  | -9.5370  | H | 0 | -12.7220 | 0.6700  | 5.9710  | H | 0 | -8.0030  | 15.6800 | 17.5510 | H | 0 |
| -16.4210 | 7.7240  | -9.7000  | H | 0 | -11.4790 | 1.8600  | 7.1730  | C | 0 | -6.8060  | 15.5310 | 16.3880 | H | 0 |
| -16.0760 | 9.0570  | -8.0420  | C | 0 | -10.9980 | 1.6320  | 8.1250  | H | 0 | -11.2500 | 9.1250  | 17.2550 | C | 0 |
| -16.9040 | 8.7880  | -7.1660  | O | 0 | -12.3290 | 2.5310  | 7.3000  | H | 0 | -11.5860 | 7.9590  | 17.3540 | O | 0 |
| -15.7410 | 10.2460 | -8.3270  | O | 0 | -10.4210 | 2.4260  | 6.2220  | C | 0 | -12.1510 | 10.0150 | 16.9430 | N | 0 |
| -15.0190 | 4.0630  | -8.5170  | C | 0 | -10.8980 | 3.1800  | 5.5960  | H | 0 | -11.8760 | 10.9810 | 17.0530 | H | 0 |
| -16.1600 | 3.5600  | -8.4500  | O | 0 | -9.2280  | 2.9770  | 6.9950  | C | 0 | -13.6390 | 9.7900  | 16.7640 | C | 0 |
| -13.9690 | 3.7040  | -7.7180  | N | 0 | -8.1890  | 2.4180  | 6.9910  | O | 0 | -13.7900 | 8.7820  | 17.1510 | H | 0 |
| -13.1400 | 4.2260  | -7.9610  | H | 0 | -9.3220  | 4.1260  | 7.7050  | N | 0 | -14.4540 | 10.7310 | 17.6970 | C | 0 |
| -14.0410 | 2.4100  | -6.9250  | C | 0 | -10.0560 | 4.7570  | 7.4170  | H | 0 | -15.5210 | 10.6790 | 17.4790 | H | 0 |
| -15.0920 | 2.2050  | -6.7220  | H | 0 | -8.4350  | 4.5870  | 8.7820  | C | 0 | -14.2340 | 10.3840 | 18.7060 | H | 0 |
| -13.6010 | 1.1280  | -7.6830  | C | 0 | -7.9410  | 3.6680  | 9.0970  | H | 0 | -14.0930 | 12.2650 | 17.6190 | C | 0 |
| -13.4340 | 0.2890  | -7.0080  | H | 0 | -7.3440  | 5.4820  | 8.1160  | C | 0 | -12.8460 | 12.6210 | 17.5600 | O | 0 |
| -14.6810 | 0.7470  | -8.6020  | C | 0 | -7.1590  | 5.1970  | 7.0810  | H | 0 | -14.9780 | 13.1440 | 17.5970 | O | 0 |
| -14.4760 | -0.2680 | -8.9400  | H | 0 | -7.6200  | 6.5360  | 8.1460  | H | 0 | -14.1950 | 9.7790  | 15.3640 | C | 0 |
| -15.6380 | 0.7230  | -8.0800  | H | 0 | -6.0560  | 5.3700  | 8.9890  | C | 0 | -15.3560 | 9.9410  | 15.1420 | O | 0 |
| -14.7750 | 1.3910  | -9.4760  | H | 0 | -6.3830  | 5.3840  | 10.0290 | H | 0 | -13.3430 | 9.7610  | 14.3100 | N | 0 |
| -12.4930 | 1.3000  | -8.4950  | O | 0 | -5.1190  | 4.1600  | 8.5990  | C | 0 | -12.3800 | 9.5820  | 14.5600 | H | 0 |
| -12.7130 | 1.8980  | -9.2130  | H | 0 | -5.6360  | 3.2380  | 8.8630  | H | 0 | -13.7380 | 9.6450  | 12.9120 | C | 0 |
| -13.2540 | 2.5440  | -5.6180  | C | 0 | -4.8270  | 4.2720  | 7.5550  | H | 0 | -14.7880 | 9.3880  | 12.7720 | H | 0 |
| -12.5060 | 3.5090  | -5.5290  | O | 0 | -4.2200  | 4.1420  | 9.2160  | H | 0 | -13.7840 | 11.0590 | 12.2520 | C | 0 |
| -13.1850 | 1.6430  | -4.6090  | N | 0 | -5.2750  | 6.6960  | 8.9620  | C | 0 | -14.2190 | 10.9230 | 11.2620 | H | 0 |
| -13.8760 | 0.9060  | -4.6230  | H | 0 | -4.7590  | 6.9410  | 8.0340  | H | 0 | -14.5780 | 11.6850 | 12.6590 | H | 0 |
| -12.2440 | 1.6530  | -3.4990  | C | 0 | -5.9680  | 7.4520  | 9.3320  | H | 0 | -12.4260 | 11.8140 | 12.1460 | C | 0 |
| -11.4200 | 2.3140  | -3.7700  | H | 0 | -4.4740  | 6.4870  | 9.6710  | H | 0 | -11.6540 | 11.1300 | 12.4970 | H | 0 |
| -12.9260 | 2.2090  | -2.1560  | C | 0 | -9.1160  | 5.3080  | 9.9740  | C | 0 | -12.1410 | 12.0260 | 11.1150 | H | 0 |
| -13.7840 | 1.5670  | -1.9550  | H | 0 | -9.7100  | 6.3890  | 9.8440  | O | 0 | -12.3310 | 13.1910 | 12.8370 | C | 0 |

|          |         |         |   |   |          |         |          |   |   |          |         |          |   |   |
|----------|---------|---------|---|---|----------|---------|----------|---|---|----------|---------|----------|---|---|
| -11.3060 | 13.5610 | 12.8140 | H | 0 | -10.5990 | 8.6380  | -5.7050  | H | 0 | -11.2150 | 10.1570 | -11.2890 | C | 0 |
| -13.0190 | 13.9690 | 12.5070 | H | 0 | -11.9520 | 9.6310  | -5.0650  | H | 0 | -12.1470 | 10.5500 | -11.6950 | H | 0 |
| -12.5370 | 12.9690 | 14.3630 | C | 0 | -12.8820 | 6.9650  | -5.4680  | C | 0 | -11.5280 | 8.9640  | -10.2730 | C | 0 |
| -13.5540 | 12.6690 | 14.6130 | H | 0 | -12.3400 | 6.8500  | -6.4070  | H | 0 | -10.6410 | 8.3460  | -10.1350 | H | 0 |
| -11.8980 | 12.2330 | 14.8510 | H | 0 | -13.4280 | 6.0790  | -5.1450  | H | 0 | -12.1350 | 9.2100  | -8.8840  | C | 0 |
| -12.3590 | 14.1610 | 15.1860 | N | 0 | -13.6920 | 7.6460  | -5.7280  | H | 0 | -12.3930 | 8.3550  | -8.2590  | H | 0 |
| -11.4230 | 14.5270 | 15.0930 | H | 0 | -9.9010  | 5.9860  | -4.9120  | C | 0 | -11.3490 | 9.7050  | -8.3140  | H | 0 |
| -12.9880 | 14.8970 | 14.8980 | H | 0 | -8.8980  | 6.7310  | -5.0040  | O | 0 | -13.0330 | 9.8270  | -8.8830  | H | 0 |
| -12.5100 | 13.9540 | 16.1630 | H | 0 | -9.9900  | 4.7900  | -5.4890  | N | 0 | -12.5770 | 8.0720  | -10.9360 | C | 0 |
| -12.8700 | 8.6560  | 12.1700 | C | 0 | -10.8630 | 4.2900  | -5.4010  | H | 0 | -12.1560 | 7.6390  | -11.8430 | H | 0 |
| -11.9900 | 8.0080  | 12.6850 | O | 0 | -9.3320  | 4.3260  | -6.6650  | C | 0 | -12.9070 | 7.3470  | -10.1930 | H | 0 |
| -13.4000 | 8.2270  | 11.0290 | N | 0 | -8.2540  | 4.4770  | -6.6130  | H | 0 | -13.4200 | 8.7170  | -11.1860 | H | 0 |
| -14.3240 | 8.5940  | 10.8510 | H | 0 | -9.6730  | 2.8080  | -6.7970  | C | 0 | -10.6280 | 11.3300 | -10.5520 | C | 0 |
| -12.8290 | 7.2790  | 10.1200 | C | 0 | -10.7070 | 2.5880  | -7.0620  | H | 0 | -9.4370  | 11.5910 | -10.6210 | O | 0 |
| -11.7860 | 7.1390  | 10.4030 | H | 0 | -9.1330  | 2.4630  | -7.6780  | H | 0 | -11.4850 | 12.0260 | -9.8020  | N | 0 |
| -13.5910 | 5.8910  | 10.0730 | C | 0 | -9.2680  | 2.0650  | -5.6480  | O | 0 | -12.4800 | 11.8670 | -8.9790  | H | 0 |
| -13.5710 | 5.5400  | 11.1050 | H | 0 | -8.8130  | 1.3290  | -6.0650  | H | 0 | -11.0940 | 13.1030 | -8.8600  | C | 0 |
| -15.0590 | 5.8310  | 9.6250  | C | 0 | -9.8730  | 5.1240  | -7.9290  | C | 0 | -10.2410 | 13.6440 | -9.2720  | H | 0 |
| -15.5790 | 6.4840  | 10.3250 | H | 0 | -10.8820 | 5.8320  | -7.9250  | O | 0 | -12.2100 | 14.1520 | -8.7140  | C | 0 |
| -15.1830 | 6.3960  | 8.7010  | H | 0 | -9.2710  | 4.8740  | -9.1530  | N | 0 | -13.1870 | 13.6710 | -11.8360 | H | 0 |
| -15.5250 | 4.8460  | 9.5910  | H | 0 | -8.4690  | 4.2660  | -9.2410  | H | 0 | -12.1880 | 14.6050 | -7.7220  | H | 0 |
| -12.7790 | 4.9530  | 9.1700  | C | 0 | -9.8650  | 5.3220  | -10.4130 | C | 0 | -12.3370 | 15.2210 | -9.7990  | C | 0 |
| -11.7500 | 4.8860  | 9.5210  | H | 0 | -10.0930 | 4.4330  | -10.9990 | H | 0 | -11.3910 | 15.2500 | -10.3390 | H | 0 |
| -13.0810 | 3.9100  | 9.2600  | H | 0 | -10.8410 | 5.7530  | -10.1880 | H | 0 | -13.0640 | 14.8790 | -10.5360 | H | 0 |
| -12.8090 | 5.2930  | 8.1350  | H | 0 | -9.0040  | 6.3050  | -11.2050 | C | 0 | -12.8580 | 16.5460 | -9.3890  | C | 0 |
| -12.6980 | 7.8700  | 8.7240  | C | 0 | -9.5030  | 6.8710  | -12.1670 | O | 0 | -13.0330 | 17.0350 | -10.3480 | H | 0 |
| -13.5490 | 8.5520  | 8.1130  | O | 0 | -7.7250  | 6.4160  | -10.9100 | N | 0 | -13.7250 | 16.3950 | -8.7470  | H | 0 |
| -11.5210 | 7.6830  | 8.1260  | N | 0 | -7.4430  | 5.8530  | -10.1210 | H | 0 | -11.9040 | 17.3290 | -8.5550  | N | 0 |
| -10.8470 | 7.1440  | 8.6510  | H | 0 | -6.8080  | 7.2550  | -11.6310 | C | 0 | -10.9810 | 16.9900 | -8.3230  | H | 0 |
| -10.9880 | 8.1710  | 6.8890  | C | 0 | -7.2490  | 8.2500  | -11.5810 | H | 0 | -12.1620 | 18.5650 | -8.1500  | C | 0 |
| -11.5680 | 9.0150  | 6.5170  | H | 0 | -5.8690  | 7.2080  | -11.0790 | H | 0 | -13.3160 | 19.2090 | -8.3120  | N | 0 |
| -9.5670  | 8.7170  | 7.0900  | C | 0 | -6.5980  | 6.9210  | -13.0960 | C | 0 | -14.0510 | 18.8760 | -8.9200  | H | 0 |
| -8.9140  | 7.8980  | 7.3890  | H | 0 | -6.3860  | 7.7440  | -14.0260 | O | 0 | -13.3960 | 20.0890 | -7.8230  | H | 0 |
| -9.1590  | 9.1710  | 6.1860  | H | 0 | -6.7460  | 5.6120  | -13.3970 | N | 0 | -11.2080 | 19.1570 | -7.4880  | N | 0 |
| -9.3360  | 9.7940  | 8.1300  | C | 0 | -7.1680  | 5.0740  | -12.6530 | H | 0 | -10.3080 | 18.7100 | -7.3840  | H | 0 |
| -9.7360  | 9.3840  | 9.0570  | H | 0 | -6.7490  | 5.0280  | -14.7380 | C | 0 | -11.4110 | 20.0530 | -7.0690  | H | 0 |
| -7.9610  | 10.2090 | 8.3350  | C | 0 | -6.0250  | 5.5920  | -15.3260 | H | 0 | -10.7180 | 12.4520 | -7.5200  | C | 0 |
| -7.6780  | 10.9080 | 7.5480  | H | 0 | -6.3660  | 3.5550  | -14.8170 | C | 0 | -11.5560 | 12.1680 | -6.6870  | O | 0 |
| -7.9540  | 10.7420 | 9.2860  | H | 0 | -6.7690  | 3.0580  | -13.9350 | H | 0 | -9.4210  | 12.1230 | -7.4210  | N | 0 |
| -7.2110  | 9.4190  | 8.3680  | H | 0 | -6.8860  | 3.1380  | -15.6790 | H | 0 | -8.8480  | 12.2060 | -8.2480  | H | 0 |
| -10.2680 | 11.0040 | 8.1110  | C | 0 | -4.8610  | 3.2700  | -14.9310 | C | 0 | -8.8500  | 11.4980 | -6.2780  | C | 0 |
| -9.7950  | 11.7430 | 8.7580  | H | 0 | -4.7980  | 2.2010  | -15.1380 | H | 0 | -9.2880  | 10.5060 | -6.1780  | H | 0 |
| -10.2660 | 11.4100 | 7.0990  | H | 0 | -4.4260  | 3.8290  | -15.7590 | H | 0 | -7.7860  | 11.4630 | -6.5120  | H | 0 |
| -11.2790 | 10.7800 | 8.4530  | H | 0 | -4.0890  | 3.5110  | -13.6660 | C | 0 | -9.0370  | 12.4270 | -5.0950  | C | 0 |
| -10.9660 | 7.1690  | 5.6560  | C | 0 | -3.6760  | 4.6110  | -13.2880 | O | 0 | -8.8220  | 13.6080 | -5.2140  | O | 0 |
| -10.7840 | 6.0020  | 5.9270  | O | 0 | -3.6700  | 2.6680  | -12.8460 | O | 0 | -9.4410  | 11.8950 | -3.9530  | N | 0 |
| -11.1940 | 7.5760  | 4.4190  | N | 0 | -8.0970  | 5.2040  | -15.4000 | C | 0 | -9.7730  | 10.9420 | -3.9860  | H | 0 |
| -11.5540 | 8.5130  | 4.3080  | H | 0 | -8.1380  | 5.1630  | -16.6440 | O | 0 | -9.8620  | 12.6300 | -2.7370  | C | 0 |
| -11.4270 | 6.6580  | 3.2790  | C | 0 | -9.1490  | 5.5640  | -14.6010 | N | 0 | -9.1330  | 13.4040 | -2.4980  | H | 0 |
| -10.6880 | 5.8620  | 3.3690  | H | 0 | -8.9440  | 5.8260  | -13.6470 | H | 0 | -11.2790 | 13.2170 | -3.0830  | C | 0 |
| -12.9200 | 6.1420  | 3.4390  | C | 0 | -10.3960 | 6.0400  | -15.2060 | C | 0 | -11.6410 | 14.0050 | -2.4240  | H | 0 |
| -12.9600 | 5.4370  | 4.2700  | H | 0 | -10.3680 | 5.8770  | -16.2840 | H | 0 | -11.2200 | 13.5340 | -4.1250  | H | 0 |
| -13.9270 | 7.2310  | 3.7460  | C | 0 | -11.6300 | 5.3890  | -14.5910 | C | 0 | -12.4380 | 12.2120 | -3.1590  | C | 0 |
| -13.5790 | 7.7530  | 4.6380  | H | 0 | -11.4440 | 5.1720  | -13.5400 | H | 0 | -12.1730 | 11.3510 | -3.7720  | H | 0 |
| -13.8590 | 7.9270  | 2.9100  | H | 0 | -12.5060 | 6.0350  | -14.6440 | H | 0 | -12.5910 | 11.8770 | -2.1340  | H | 0 |
| -14.9880 | 6.9890  | 3.8090  | H | 0 | -12.0170 | 3.9870  | -15.2050 | C | 0 | -13.6550 | 12.8010 | -3.8010  | C | 0 |
| -13.3590 | 5.2900  | 2.2340  | C | 0 | -13.2550 | 3.8530  | -15.8930 | C | 0 | -14.1290 | 13.5370 | -3.1530  | H | 0 |
| -13.5260 | 5.8910  | 1.3400  | H | 0 | -13.9630 | 4.6680  | -15.9220 | H | 0 | -13.4000 | 13.2620 | -4.7550  | H | 0 |
| -12.6690 | 4.5000  | 1.9390  | H | 0 | -13.6820 | 2.6660  | -16.4560 | C | 0 | -14.6070 | 11.7020 | -4.0570  | N | 0 |
| -14.3260 | 4.8380  | 2.4550  | H | 0 | -14.5990 | 2.5070  | -17.0040 | H | 0 | -15.2120 | 11.5250 | -3.2670  | H | 0 |
| -11.0520 | 7.2580  | 1.8560  | C | 0 | -12.8600 | 1.5310  | -16.2500 | C | 0 | -14.9930 | 11.1940 | -5.2410  | C | 0 |
| -11.4970 | 8.3520  | 1.5830  | O | 0 | -13.0640 | 0.5650  | -16.6880 | H | 0 | -14.4060 | 11.5000 | -6.3700  | N | 0 |
| -10.2500 | 6.5450  | 1.0550  | N | 0 | -11.5590 | 1.7010  | -15.6270 | C | 0 | -13.5480 | 12.0310 | -6.3420  | H | 0 |
| -9.7400  | 5.7210  | 1.3410  | H | 0 | -10.8320 | 0.9030  | -15.6420 | H | 0 | -14.7450 | 11.1530 | -7.2560  | H | 0 |
| -9.8700  | 7.0380  | -0.2630 | C | 0 | -11.1460 | 2.9090  | -15.1680 | C | 0 | -16.1320 | 10.4960 | -5.2450  | N | 0 |
| -9.6230  | 8.0920  | -0.1390 | H | 0 | -10.2170 | 2.9990  | -14.6250 | H | 0 | -16.6350 | 10.3480 | -4.3820  | H | 0 |
| -8.9440  | 6.5490  | -0.5670 | H | 0 | -10.5660 | 7.5710  | -15.1430 | C | 0 | -16.4990 | 10.1300 | -6.1120  | H | 0 |
| -10.8200 | 6.9970  | -1.4640 | C | 0 | -11.6170 | 8.0940  | -15.4660 | O | 0 | -9.8480  | 11.7030 | -1.4590  | C | 0 |
| -12.0470 | 7.0200  | -1.2540 | O | 0 | -9.4720  | 8.2560  | -14.7560 | N | 0 | -9.7210  | 10.4870 | -1.6920  | O | 0 |
| -10.2440 | 6.9450  | -2.6650 | N | 0 | -8.6930  | 7.7870  | -14.3160 | H | 0 | -10.0500 | 12.1800 | -0.2640  | N | 0 |
| -9.2380  | 7.0050  | -2.7280 | H | 0 | -9.4800  | 9.7220  | -14.8060 | C | 0 | -10.3930 | 13.1300 | -0.2600  | H | 0 |
| -10.9820 | 6.4480  | -3.8780 | C | 0 | -8.5110  | 10.2180 | -14.8700 | H | 0 | -10.3330 | 11.4360 | 0.9930   | C | 0 |
| -11.7730 | 5.7180  | -3.7060 | H | 0 | -10.0060 | 10.1880 | -15.6400 | H | 0 | -10.6130 | 10.4080 | 0.7620   | H | 0 |
| -11.9540 | 7.6030  | -4.3970 | H | 0 | -10.1640 | 10.3630 | -13.5180 | C | 0 | -9.0280  | 11.3030 | 1.9220   | C | 0 |
| -12.5540 | 7.7740  | -3.5030 | H | 0 | -10.3710 | 11.5570 | -13.5550 | O | 0 | -8.5130  | 12.2540 | 2.0580   | H | 0 |
| -11.2340 | 8.8410  | -4.8420 | C | 0 | -10.4510 | 9.6480  | -12.4180 | N | 0 | -9.4200  | 10.8460 | 3.3980   | C | 0 |
| -10.5510 | 9.3030  | -4.1290 | H | 0 | -10.4810 | 8.6410  | -12.4920 | H | 0 | -8.4990  | 10.7900 | 3.9790   | H | 0 |

|          |         |         |   |   |          |         |         |   |   |          |         |         |   |   |
|----------|---------|---------|---|---|----------|---------|---------|---|---|----------|---------|---------|---|---|
| -10.0540 | 11.5890 | 3.8820  | H | 0 | -19.3310 | 6.7740  | 15.4350 | N | 0 | -16.0780 | 15.2890 | 9.7890  | C | 0 |
| -9.9910  | 9.9180  | 3.4050  | H | 0 | -19.1310 | 7.7580  | 15.3270 | H | 0 | -15.1370 | 14.8830 | 9.4190  | H | 0 |
| -8.0220  | 10.2370 | 1.5080  | C | 0 | -20.5640 | 6.4860  | 16.1170 | C | 0 | -15.6670 | 16.3350 | 10.8220 | C | 0 |
| -7.0790  | 10.5440 | 1.9590  | H | 0 | -20.5860 | 5.3980  | 16.1780 | H | 0 | -15.4860 | 17.2890 | 10.3270 | H | 0 |
| -8.2950  | 9.2450  | 1.8700  | H | 0 | -20.4860 | 7.2510  | 17.4410 | C | 0 | -16.4580 | 16.4350 | 11.5640 | H | 0 |
| -7.8490  | 10.1980 | 0.4330  | H | 0 | -20.1290 | 8.2660  | 17.2670 | H | 0 | -14.7480 | 16.0710 | 11.3460 | H | 0 |
| -11.4940 | 12.1180 | 1.6530  | C | 0 | -21.5190 | 7.3230  | 17.7820 | H | 0 | -16.5900 | 14.0130 | 10.5630 | C | 0 |
| -11.5430 | 13.3750 | 1.6370  | O | 0 | -19.6200 | 6.6770  | 18.5430 | C | 0 | -17.4910 | 14.2260 | 11.1380 | H | 0 |
| -12.4730 | 11.4240 | 2.1800  | N | 0 | -19.8620 | 5.5560  | 18.9450 | O | 0 | -16.6230 | 13.0920 | 9.9810  | H | 0 |
| -12.4810 | 10.4420 | 1.9440  | H | 0 | -18.6270 | 7.4000  | 19.0680 | N | 0 | -15.9120 | 13.7930 | 11.3880 | H | 0 |
| -13.6000 | 11.8340 | 3.0270  | C | 0 | -17.9120 | 6.9160  | 19.5920 | H | 0 | -16.4350 | 16.7620 | 7.6660  | C | 0 |
| -13.6020 | 12.9240 | 3.0400  | H | 0 | -18.4400 | 8.3440  | 18.7590 | H | 0 | -16.5280 | 17.9780 | 7.7570  | O | 0 |
| -14.4930 | 11.3360 | 2.6510  | H | 0 | -21.8710 | 6.8340  | 15.3330 | C | 0 | -15.6980 | 16.1850 | 6.6780  | N | 0 |
| -13.5220 | 11.2620 | 4.5050  | C | 0 | -22.8800 | 6.2440  | 15.6620 | O | 0 | -15.6930 | 15.1820 | 6.5650  | H | 0 |
| -13.0260 | 10.1850 | 4.7980  | O | 0 | -21.8280 | 7.6220  | 14.2080 | N | 0 | -15.0590 | 16.8840 | 5.5830  | C | 0 |
| -14.0050 | 12.0550 | 5.4700  | N | 0 | -20.9870 | 8.1640  | 14.0720 | H | 0 | -15.7410 | 17.6740 | 5.2700  | H | 0 |
| -14.3460 | 12.9930 | 5.3130  | H | 0 | -23.1190 | 8.1450  | 13.6620 | C | 0 | -13.8560 | 17.5840 | 6.0780  | C | 0 |
| -13.9270 | 11.7530 | 6.9060  | C | 0 | -23.9310 | 7.5040  | 14.0040 | H | 0 | -13.3340 | 18.0130 | 5.2220  | H | 0 |
| -13.4150 | 10.7920 | 6.9580  | H | 0 | -23.4930 | 9.4960  | 14.2940 | C | 0 | -14.1350 | 18.3870 | 6.7610  | H | 0 |
| -13.0680 | 12.8120 | 7.6290  | C | 0 | -24.5260 | 9.6560  | 16.0480 | H | 0 | -12.8840 | 16.6580 | 6.8320  | C | 0 |
| -12.9430 | 12.5770 | 8.6860  | H | 0 | -23.4180 | 9.4500  | 15.7540 | C | 0 | -12.8510 | 16.5580 | 8.1480  | C | 0 |
| -12.1260 | 12.9370 | 7.0960  | H | 0 | -23.7370 | 10.4550 | 16.0300 | H | 0 | -13.5120 | 17.1080 | 8.8000  | H | 0 |
| -13.6340 | 13.7430 | 7.5890  | H | 0 | -24.1970 | 8.7640  | 16.0870 | H | 0 | -11.8010 | 15.7700 | 8.5180  | N | 0 |
| -15.3180 | 11.5330 | 7.5320  | C | 0 | -22.3790 | 9.3000  | 16.0480 | H | 0 | -11.5510 | 15.4780 | 9.4520  | H | 0 |
| -16.1550 | 12.4250 | 7.4050  | O | 0 | -22.5820 | 10.3820 | 13.7890 | O | 0 | -11.1620 | 15.2450 | 7.3890  | C | 0 |
| -15.5260 | 10.4590 | 8.3620  | N | 0 | -21.9840 | 10.4460 | 14.5370 | H | 0 | -10.0630 | 14.3810 | 7.2590  | C | 0 |
| -14.8360 | 9.7220  | 8.3460  | H | 0 | -23.2260 | 8.2450  | 12.1090 | C | 0 | -9.7120  | 13.9680 | 8.1930  | H | 0 |
| -16.8740 | 10.1990 | 8.8280  | C | 0 | -24.3320 | 8.4430  | 11.5720 | O | 0 | -9.5880  | 13.9650 | 6.0320  | C | 0 |
| -17.4170 | 11.1330 | 8.6810  | H | 0 | -22.0700 | 8.1550  | 11.4120 | N | 0 | -8.8650  | 13.1800 | 5.8640  | H | 0 |
| -17.5310 | 9.0270  | 7.9780  | C | 0 | -21.1940 | 8.0100  | 11.8930 | H | 0 | -10.2130 | 14.6040 | 4.9180  | C | 0 |
| -16.9480 | 8.1530  | 8.2680  | H | 0 | -22.0250 | 8.0410  | 9.9250  | C | 0 | -9.9290  | 14.2960 | 3.9230  | H | 0 |
| -18.5080 | 8.7580  | 8.3810  | H | 0 | -21.0370 | 7.6660  | 9.6560  | H | 0 | -11.3060 | 15.5110 | 5.0490  | C | 0 |
| -17.7010 | 9.2130  | 6.4490  | C | 0 | -22.6670 | 7.2280  | 9.5840  | H | 0 | -11.7750 | 15.9930 | 4.2030  | H | 0 |
| -16.6220 | 8.9320  | 5.5500  | C | 0 | -22.1550 | 9.4610  | 9.2070  | C | 0 | -11.8450 | 15.8000 | 6.3160  | C | 0 |
| -15.7420 | 8.4770  | 5.9800  | H | 0 | -22.0420 | 9.6470  | 7.9900  | O | 0 | -14.7740 | 15.9780 | 4.3930  | C | 0 |
| -16.7650 | 9.2080  | 4.1540  | C | 0 | -22.2110 | 10.5350 | 9.9960  | N | 0 | -14.9070 | 14.7610 | 4.4750  | O | 0 |
| -15.9700 | 9.0800  | 3.4340  | H | 0 | -22.4790 | 10.3570 | 10.9540 | H | 0 | -14.4660 | 16.5630 | 3.2210  | N | 0 |
| -17.9800 | 9.6750  | 3.7080  | C | 0 | -22.0560 | 11.9870 | 9.6410  | C | 0 | -14.4320 | 17.5730 | 3.1960  | H | 0 |
| -18.2210 | 9.8310  | 2.3910  | O | 0 | -22.8440 | 12.2610 | 8.9400  | H | 0 | -13.9410 | 15.9140 | 2.0270  | C | 0 |
| -17.4560 | 9.7020  | 1.8240  | H | 0 | -22.3340 | 12.6520 | 11.0150 | C | 0 | -13.4770 | 14.9540 | 2.2520  | H | 0 |
| -19.0860 | 9.8520  | 4.5870  | C | 0 | -21.8110 | 12.1070 | 11.8010 | H | 0 | -15.1310 | 15.6830 | 1.0040  | C | 0 |
| -20.0790 | 10.0370 | 4.2040  | H | 0 | -21.8370 | 13.6170 | 11.1120 | H | 0 | -16.0260 | 15.2470 | 1.4460  | H | 0 |
| -18.9020 | 9.6860  | 5.9770  | C | 0 | -23.7450 | 12.8180 | 11.3620 | C | 0 | -15.3740 | 16.7300 | 0.8220  | H | 0 |
| -19.8090 | 9.8260  | 6.5460  | H | 0 | -24.6100 | 13.1150 | 10.5730 | O | 0 | -14.7360 | 15.1000 | -0.3890 | C | 0 |
| -16.9120 | 9.7920  | 10.3280 | C | 0 | -24.0870 | 12.8380 | 12.6620 | N | 0 | -13.7220 | 15.3650 | -0.6900 | H | 0 |
| -16.0630 | 9.0630  | 10.8110 | O | 0 | -25.0730 | 12.9590 | 12.8450 | H | 0 | -14.8270 | 13.6100 | -0.1970 | C | 0 |
| -17.8840 | 10.2740 | 11.1530 | N | 0 | -23.3540 | 12.9350 | 13.3500 | H | 0 | -14.8290 | 13.1710 | -1.1950 | H | 0 |
| -18.6920 | 10.6940 | 10.7160 | H | 0 | -20.6580 | 12.2830 | 9.1070  | C | 0 | -13.9930 | 13.2870 | 0.4270  | H | 0 |
| -17.9600 | 10.0850 | 12.6200 | C | 0 | -19.7100 | 11.8580 | 9.6980  | O | 0 | -15.7540 | 13.3460 | 0.3120  | H | 0 |
| -17.0190 | 10.3890 | 13.0790 | H | 0 | -20.6150 | 12.9330 | 7.8940  | N | 0 | -15.6430 | 15.6560 | -1.4420 | C | 0 |
| -19.1350 | 10.9020 | 13.1160 | C | 0 | -21.4230 | 13.3100 | 7.4190  | H | 0 | -15.5680 | 16.7420 | -1.4050 | H | 0 |
| -18.8170 | 11.9390 | 13.0130 | H | 0 | -19.3740 | 13.3200 | 7.1720  | C | 0 | -15.3100 | 15.2950 | -2.4160 | H | 0 |
| -20.0080 | 10.7310 | 12.4860 | H | 0 | -18.6430 | 12.5640 | 7.4600  | H | 0 | -16.6380 | 15.2510 | -1.2570 | H | 0 |
| -19.4870 | 10.6590 | 14.6370 | C | 0 | -19.5390 | 13.2680 | 5.6110  | C | 0 | -12.8430 | 16.7080 | 1.4110  | C | 0 |
| -19.2710 | 9.6000  | 15.2370 | O | 0 | -20.1070 | 12.4160 | 5.2370  | H | 0 | -12.9090 | 17.9430 | 1.4080  | O | 0 |
| -20.2790 | 11.4920 | 15.1240 | O | 0 | -19.9970 | 14.1740 | 5.2160  | H | 0 | -11.6810 | 16.0600 | 1.0520  | N | 0 |
| -18.1950 | 8.5710  | 13.0060 | C | 0 | -18.1480 | 13.1390 | 4.9660  | C | 0 | -11.7650 | 15.0580 | 0.9660  | H | 0 |
| -19.1750 | 7.8970  | 12.6870 | O | 0 | -17.5600 | 13.7680 | 5.6340  | H | 0 | -10.5600 | 16.6930 | 0.5430  | C | 0 |
| -17.2580 | 8.0180  | 13.8270 | N | 0 | -17.7890 | 12.1200 | 5.1100  | H | 0 | -10.8770 | 17.7310 | 0.4450  | H | 0 |
| -16.5780 | 8.6680  | 14.1950 | H | 0 | -17.9540 | 13.4650 | 3.5050  | C | 0 | -9.5050  | 16.5800 | 1.6590  | C | 0 |
| -17.2980 | 6.5550  | 14.0670 | C | 0 | -16.9510 | 13.2100 | 3.1630  | H | 0 | -9.0220  | 15.6130 | 1.7960  | H | 0 |
| -17.2950 | 6.0020  | 13.1270 | H | 0 | -18.5450 | 12.7940 | 2.8820  | H | 0 | -8.8100  | 17.3760 | 1.3910  | H | 0 |
| -16.1080 | 5.9950  | 14.8710 | C | 0 | -18.2660 | 14.8650 | 3.2870  | N | 0 | -9.8690  | 17.0080 | 2.5930  | H | 0 |
| -16.3330 | 4.9420  | 15.0410 | H | 0 | -18.3600 | 15.4310 | 4.1190  | H | 0 | -10.0250 | 16.2160 | -0.8340 | C | 0 |
| -14.8560 | 6.2720  | 13.9740 | C | 0 | -18.5830 | 15.3640 | 2.1120  | C | 0 | -9.5350  | 15.1040 | -0.9770 | O | 0 |
| -13.9780 | 5.7370  | 14.3380 | H | 0 | -18.8340 | 14.6400 | 1.0330  | N | 0 | -9.9040  | 17.0310 | -1.8840 | N | 0 |
| -15.0120 | 5.7570  | 13.0260 | H | 0 | -18.8220 | 13.6330 | 1.1170  | H | 0 | -10.1850 | 17.9770 | -1.6680 | H | 0 |
| -14.7790 | 7.3530  | 13.8590 | H | 0 | -19.3190 | 15.0340 | 0.2400  | H | 0 | -9.3880  | 16.5870 | -3.2090 | C | 0 |
| -15.8730 | 6.6490  | 16.2020 | C | 0 | -18.7200 | 16.6460 | 2.0520  | N | 0 | -9.7360  | 15.5540 | -3.2290 | H | 0 |
| -15.4920 | 7.6680  | 16.1330 | H | 0 | -18.6390 | 17.1940 | 2.8970  | H | 0 | -10.1530 | 17.3790 | -4.2770 | C | 0 |
| -16.8100 | 6.6070  | 16.7570 | H | 0 | -18.8200 | 17.1280 | 1.1710  | H | 0 | -9.8800  | 18.4200 | -4.1060 | H | 0 |
| -14.9260 | 5.9450  | 17.0940 | C | 0 | -18.9070 | 14.6890 | 7.6700  | C | 0 | -9.6920  | 17.1430 | -5.2360 | H | 0 |
| -15.0920 | 6.2930  | 18.1140 | H | 0 | -19.6690 | 15.6600 | 7.7890  | O | 0 | -11.6510 | 17.1860 | -4.3160 | C | 0 |
| -15.0740 | 4.8650  | 17.0920 | H | 0 | -17.6160 | 14.7230 | 8.0630  | N | 0 | -12.5800 | 18.0270 | -3.6450 | C | 0 |
| -13.8960 | 6.2010  | 16.8480 | H | 0 | -17.0170 | 13.9120 | 8.0080  | H | 0 | -12.2390 | 18.7250 | -2.8960 | H | 0 |
| -18.5850 | 5.9870  | 14.7010 | C | 0 | -17.0690 | 15.9110 | 8.7550  | C | 0 | -13.9530 | 17.8920 | -3.9100 | C | 0 |
| -18.7930 | 4.7360  | 14.6310 | O | 0 | -17.8730 | 16.3950 | 9.3090  | H | 0 | -14.7440 | 18.4530 | -3.4360 | H | 0 |



|          |         |         |   |   |          |         |         |   |   |         |         |         |   |   |
|----------|---------|---------|---|---|----------|---------|---------|---|---|---------|---------|---------|---|---|
| -14.4450 | 17.0900 | -4.8940 | C | 0 | -13.7890 | 25.8520 | -1.3370 | C | 0 | -3.9580 | 24.5560 | 4.8240  | N | 0 |
| -15.7970 | 16.9300 | -5.1190 | O | 0 | -14.4890 | 25.8260 | -2.1730 | H | 0 | -3.1530 | 23.9610 | 4.6910  | H | 0 |
| -16.0240 | 16.1640 | -5.6510 | H | 0 | -13.7950 | 24.8690 | -0.8660 | H | 0 | -3.9970 | 25.4110 | 6.0150  | C | 0 |
| -13.5520 | 16.3070 | -5.6510 | C | 0 | -14.1580 | 26.7750 | -0.2210 | C | 0 | -5.0010 | 25.7620 | 6.2530  | H | 0 |
| -13.9220 | 15.7660 | -6.5100 | H | 0 | -13.3720 | 27.3090 | 0.6050  | O | 0 | -3.3440 | 24.7110 | 7.2460  | C | 0 |
| -12.1970 | 16.3640 | -5.3850 | C | 0 | -15.3810 | 27.0470 | -0.1360 | O | 0 | -3.7010 | 23.6810 | 7.2300  | H | 0 |
| -11.4810 | 15.7740 | -5.9380 | H | 0 | -11.5210 | 23.8950 | -1.1400 | C | 0 | -2.2570 | 24.6900 | 7.3270  | H | 0 |
| -7.8800  | 16.8120 | -3.4200 | C | 0 | -11.9920 | 23.3530 | -0.1720 | O | 0 | -3.8980 | 25.3680 | 8.5270  | C | 0 |
| -7.2960  | 17.8510 | -3.0100 | O | 0 | -11.2890 | 23.3030 | -2.3150 | N | 0 | -5.1330 | 25.2620 | 8.6640  | O | 0 |
| -7.3230  | 15.9190 | -4.1690 | N | 0 | -10.9460 | 23.7900 | -3.1310 | H | 0 | -3.2460 | 26.2000 | 9.1880  | O | 0 |
| -7.9660  | 15.2250 | -4.5220 | H | 0 | -11.6230 | 21.9230 | -2.5290 | C | 0 | -3.3920 | 26.7880 | 5.9350  | C | 0 |
| -5.9050  | 15.8160 | -4.4450 | C | 0 | -12.5640 | 21.6340 | -2.0610 | H | 0 | -2.5500 | 27.0370 | 5.0370  | O | 0 |
| -5.4330  | 16.1070 | -3.5060 | H | 0 | -11.7800 | 21.7710 | -4.0250 | C | 0 | -3.6140 | 27.7270 | 6.8500  | N | 0 |
| -5.5960  | 14.3720 | -4.7120 | C | 0 | -11.0970 | 22.4750 | -4.5000 | H | 0 | -4.3410 | 27.4830 | 7.5080  | H | 0 |
| -6.1400  | 14.1110 | -5.6200 | H | 0 | -11.5320 | 20.7410 | -4.2830 | H | 0 | -2.6960 | 28.7620 | 7.2190  | C | 0 |
| -4.5410  | 14.2100 | -4.9310 | H | 0 | -13.2320 | 21.9150 | -4.4470 | C | 0 | -2.6380 | 29.4220 | 6.3530  | H | 0 |
| -5.9690  | 13.4380 | -3.8020 | O | 0 | -13.9240 | 21.2720 | -3.9030 | H | 0 | -2.9680 | 29.5310 | 8.5560  | C | 0 |
| -5.8280  | 12.5720 | -4.1910 | H | 0 | -13.6450 | 22.8850 | -4.1730 | H | 0 | -4.0300 | 29.7470 | 8.4440  | H | 0 |
| -5.3600  | 16.7290 | -5.6270 | C | 0 | -13.4480 | 21.7300 | -5.9110 | C | 0 | -2.8730 | 28.9080 | 9.4460  | H | 0 |
| -4.1930  | 16.6770 | -6.0550 | O | 0 | -14.5020 | 22.0820 | -6.4800 | O | 0 | -2.2340 | 30.6530 | 8.7800  | O | 0 |
| -6.2980  | 17.5720 | -6.1380 | N | 0 | -12.4810 | 21.2950 | -6.5520 | O | 0 | -2.6460 | 31.4090 | 8.3570  | H | 0 |
| -7.1490  | 17.6760 | -5.6040 | H | 0 | -10.4900 | 21.0350 | -1.9590 | C | 0 | -1.2260 | 28.3190 | 7.2850  | C | 0 |
| -6.1110  | 18.3550 | -7.4640 | C | 0 | -10.7330 | 20.0610 | -1.2510 | O | 0 | -0.3500 | 28.9040 | 6.6550  | O | 0 |
| -5.0930  | 18.7410 | -7.3990 | H | 0 | -9.3190  | 21.3830 | -2.3130 | N | 0 | -0.9620 | 27.2860 | 8.0600  | N | 0 |
| -6.2030  | 17.3260 | -8.6020 | C | 0 | -9.2180  | 22.1880 | -2.9160 | H | 0 | -1.7090 | 26.8850 | 8.6080  | H | 0 |
| -5.7760  | 17.7540 | -9.5080 | H | 0 | -8.0420  | 20.6770 | -1.8750 | C | 0 | 0.3630  | 26.7280 | 8.1210  | C | 0 |
| -5.5390  | 16.4890 | -8.3850 | H | 0 | -8.2680  | 19.6560 | -2.1840 | H | 0 | 1.0240  | 27.5380 | 8.4280  | H | 0 |
| -7.4390  | 16.6300 | -9.1410 | C | 0 | -6.8430  | 21.2370 | -2.7390 | C | 0 | 0.3330  | 25.7150 | 9.2550  | C | 0 |
| -7.9990  | 17.4890 | -9.5100 | H | 0 | -6.8410  | 22.3150 | -2.5750 | H | 0 | -0.3400 | 24.8770 | 9.0740  | H | 0 |
| -7.3080  | 15.9380 | -9.9730 | H | 0 | -5.5050  | 20.6370 | -2.2190 | C | 0 | 1.3730  | 25.4090 | 9.3670  | H | 0 |
| -8.2310  | 15.8580 | -8.0760 | C | 0 | -4.6870  | 21.0690 | -2.7950 | H | 0 | -0.1290 | 26.3010 | 10.6190 | C | 0 |
| -9.3020  | 16.3840 | -7.7600 | O | 0 | -5.3740  | 21.0040 | -1.2010 | H | 0 | -0.4190 | 25.4440 | 11.4510 | O | 0 |
| -7.7810  | 14.7280 | -7.5910 | N | 0 | -5.5370  | 19.5480 | -2.2730 | H | 0 | -0.1560 | 27.5630 | 10.8290 | O | 0 |
| -8.3320  | 14.2960 | -6.8640 | H | 0 | -6.8950  | 20.8080 | -4.2310 | C | 0 | 0.8740  | 26.0860 | 6.8460  | C | 0 |
| -7.0400  | 14.1930 | -8.0200 | H | 0 | -6.8550  | 19.7390 | -4.4390 | H | 0 | 1.9550  | 25.5060 | 6.9320  | O | 0 |
| -7.1360  | 19.4730 | -7.5600 | C | 0 | -7.8340  | 21.1360 | -4.6780 | H | 0 | 0.1920  | 26.0790 | 5.7130  | N | 0 |
| -8.2620  | 19.2470 | -7.2080 | O | 0 | -6.0860  | 21.2870 | -4.7830 | H | 0 | -0.7470 | 26.4260 | 5.5810  | H | 0 |
| -6.7970  | 20.6350 | -8.1590 | N | 0 | -7.8590  | 20.7790 | -0.3140 | C | 0 | 0.6200  | 25.1570 | 4.6660  | C | 0 |
| -5.8850  | 20.8440 | -8.5380 | H | 0 | -7.2200  | 19.9070 | 0.2450  | O | 0 | 0.6210  | 24.1600 | 5.1070  | H | 0 |
| -7.7140  | 21.7250 | -8.4790 | C | 0 | -8.3450  | 21.8190 | 0.3640  | N | 0 | -0.5010 | 25.1520 | 3.5950  | C | 0 |
| -7.3110  | 22.2060 | -9.3700 | H | 0 | -8.7540  | 22.5340 | -0.2200 | H | 0 | -1.4590 | 24.8550 | 4.0220  | H | 0 |
| -8.7200  | 21.3940 | -8.7340 | H | 0 | -8.2260  | 22.2160 | 1.7430  | C | 0 | -0.6810 | 26.1320 | 3.1530  | H | 0 |
| -7.7440  | 22.8580 | -7.4000 | C | 0 | -8.6290  | 23.2240 | 1.8380  | H | 0 | -0.2990 | 24.0970 | 2.5270  | C | 0 |
| -6.8270  | 23.0180 | -6.5940 | O | 0 | -9.0170  | 21.1250 | 2.6090  | C | 0 | -0.0460 | 22.7560 | 2.8430  | C | 0 |
| -8.8550  | 23.6440 | -7.2810 | N | 0 | -8.7640  | 20.1310 | 2.2420  | H | 0 | -0.1180 | 22.4400 | 3.8740  | H | 0 |
| -10.0560 | 23.4890 | -8.0530 | C | 0 | -8.7460  | 21.2360 | 3.6590  | H | 0 | 0.2570  | 21.8070 | 1.8200  | C | 0 |
| -10.5490 | 22.5840 | -7.6980 | H | 0 | -10.5800 | 21.2930 | 2.3960  | C | 0 | 0.3190  | 20.7340 | 1.9290  | H | 0 |
| -9.8210  | 23.3830 | -9.1120 | H | 0 | -10.7390 | 21.2200 | 1.3200  | H | 0 | 0.3000  | 22.2470 | 0.4820  | C | 0 |
| -11.0640 | 24.6410 | -7.7970 | C | 0 | -11.3460 | 20.1020 | 2.9950  | C | 0 | 0.5000  | 21.4920 | -0.2630 | H | 0 |
| -12.1100 | 24.3460 | -7.8740 | H | 0 | -12.3070 | 20.1310 | 2.4820  | H | 0 | 0.1390  | 23.6160 | 0.1840  | C | 0 |
| -10.8750 | 25.4000 | -8.5560 | H | 0 | -10.8670 | 19.1360 | 2.8370  | H | 0 | 0.3100  | 23.9800 | -0.8190 | H | 0 |
| -10.6020 | 25.1140 | -6.4740 | C | 0 | -11.5090 | 20.2840 | 4.0570  | H | 0 | -0.1950 | 24.5250 | 1.1690  | C | 0 |
| -11.1040 | 24.6140 | -5.6460 | H | 0 | -11.0610 | 22.5800 | 2.9750  | C | 0 | -0.3900 | 25.5520 | 0.8970  | H | 0 |
| -10.7860 | 26.1870 | -6.4410 | H | 0 | -10.5980 | 22.5570 | 3.9620  | H | 0 | 1.8820  | 25.4640 | 3.8870  | C | 0 |
| -9.0960  | 24.8010 | -6.3360 | C | 0 | -10.7240 | 23.4390 | 2.3940  | H | 0 | 1.9210  | 26.5030 | 3.2980  | O | 0 |
| -8.5950  | 25.6460 | -6.8070 | H | 0 | -12.1490 | 22.5360 | 3.0100  | H | 0 | 2.9010  | 24.5160 | 3.9550  | N | 0 |
| -8.5540  | 24.4890 | -4.9170 | C | 0 | -6.7360  | 22.3070 | 2.1990  | C | 0 | 2.7980  | 23.8070 | 4.6660  | H | 0 |
| -8.6780  | 23.4160 | -4.3780 | O | 0 | -6.0450  | 21.3660 | 2.5930  | O | 0 | 4.1320  | 24.6280 | 3.2350  | C | 0 |
| -8.0620  | 25.5270 | -4.1490 | N | 0 | -6.2000  | 23.5400 | 2.1180  | N | 0 | 4.7600  | 23.8460 | 3.6630  | H | 0 |
| -8.0560  | 26.4150 | -4.6310 | H | 0 | -6.7770  | 24.3470 | 1.9290  | H | 0 | 3.9040  | 24.2330 | 1.7890  | C | 0 |
| -7.6980  | 25.3900 | -2.7110 | C | 0 | -4.8430  | 23.9640 | 2.5980  | C | 0 | 2.8750  | 24.4540 | 1.5030  | H | 0 |
| -6.9470  | 24.6020 | -2.6640 | H | 0 | -4.2830  | 23.0350 | 2.7100  | H | 0 | 4.4880  | 24.9830 | 1.2560  | H | 0 |
| -7.0250  | 26.7260 | -2.4420 | C | 0 | -4.1700  | 24.7710 | 1.4810  | C | 0 | 4.2460  | 22.8240 | 1.3830  | C | 0 |
| -7.6980  | 27.5820 | -2.3890 | H | 0 | -4.6670  | 25.7400 | 1.4480  | H | 0 | 4.5320  | 21.8730 | 2.1510  | O | 0 |
| -6.5860  | 26.6000 | -1.4520 | H | 0 | -3.1100  | 24.9330 | 1.6730  | H | 0 | 3.9610  | 22.5660 | 0.1180  | N | 0 |
| -5.8630  | 27.0550 | -3.3540 | C | 0 | -4.1610  | 24.1290 | 0.0590  | C | 0 | 3.9640  | 21.5890 | -0.1380 | H | 0 |
| -5.0230  | 26.1420 | -3.5170 | O | 0 | -5.1620  | 23.9800 | -0.3440 | H | 0 | 3.6210  | 23.2570 | -0.5360 | H | 0 |
| -5.9100  | 28.0770 | -4.0730 | O | 0 | -3.4540  | 25.1910 | -0.8550 | C | 0 | 5.0400  | 25.8600 | 3.4260  | C | 0 |
| -8.7740  | 25.1170 | -1.6980 | C | 0 | -4.1660  | 25.9830 | -1.0860 | H | 0 | 6.0170  | 25.9730 | 2.6520  | O | 0 |
| -8.6030  | 24.3440 | -0.7590 | O | 0 | -2.5470  | 25.6140 | -0.4250 | H | 0 | 4.7490  | 26.6870 | 4.4330  | N | 0 |
| -9.9980  | 25.6690 | -1.9570 | N | 0 | -3.2380  | 24.7460 | -1.8260 | H | 0 | 3.9740  | 26.3960 | 5.0110  | H | 0 |
| -10.1120 | 26.3790 | -2.6660 | H | 0 | -3.4450  | 22.8080 | 0.0690  | C | 0 | 5.3090  | 27.9980 | 4.5960  | C | 0 |
| -11.1940 | 25.3910 | -1.1120 | C | 0 | -4.1440  | 22.0040 | 0.2970  | H | 0 | 5.2420  | 28.5400 | 3.6530  | H | 0 |
| -11.0480 | 25.7260 | -0.0850 | H | 0 | -2.9240  | 22.5690 | -0.8570 | H | 0 | 4.5820  | 28.7640 | 5.6940  | C | 0 |
| -12.3610 | 26.1520 | -1.7650 | C | 0 | -2.7170  | 22.8500 | 0.8790  | H | 0 | 4.6240  | 28.2470 | 6.6530  | H | 0 |
| -12.1390 | 27.1960 | -1.5440 | H | 0 | -5.0230  | 24.6610 | 3.9740  | C | 0 | 5.0420  | 29.7510 | 5.7490  | H | 0 |
| -12.4030 | 25.8960 | -2.8240 | H | 0 | -6.0710  | 25.2260 | 4.1400  | O | 0 | 3.0630  | 28.8410 | 5.3990  | C | 0 |

|         |         |         |   |   |         |         |          |   |   |         |         |          |   |   |
|---------|---------|---------|---|---|---------|---------|----------|---|---|---------|---------|----------|---|---|
| 2.5790  | 27.8640 | 5.3940  | H | 0 | 13.2300 | 22.7490 | -0.8350  | H | 0 | -5.3590 | 23.6890 | -11.2810 | H | 0 |
| 2.5250  | 29.3400 | 6.2040  | H | 0 | 8.9760  | 24.0630 | -3.6390  | C | 0 | -6.0930 | 25.6860 | -10.9750 | C | 0 |
| 2.6370  | 29.5720 | 4.1160  | C | 0 | 9.0850  | 23.6550 | -4.8020  | O | 0 | -6.2730 | 26.0050 | -12.0020 | H | 0 |
| 2.9980  | 30.5970 | 4.2000  | H | 0 | 8.1990  | 23.5930 | -2.6600  | N | 0 | -7.3970 | 25.0000 | -10.4820 | C | 0 |
| 2.9610  | 29.0870 | 3.1950  | H | 0 | 8.4400  | 23.8570 | -1.7150  | H | 0 | -7.7420 | 24.1040 | -10.9980 | H | 0 |
| 1.0970  | 29.3350 | 4.2090  | C | 0 | 7.2010  | 22.5550 | -2.8260  | C | 0 | -7.3070 | 24.6460 | -9.4550  | H | 0 |
| 0.8640  | 28.2730 | 4.2900  | H | 0 | 7.6320  | 21.8000 | -3.4830  | H | 0 | -8.2200 | 25.7140 | -10.5050 | H | 0 |
| 0.7980  | 29.7860 | 5.1560  | H | 0 | 7.0260  | 21.9870 | -1.3420  | C | 0 | -5.9080 | 26.9150 | -10.2800 | O | 0 |
| 0.4150  | 30.0350 | 3.1050  | N | 0 | 6.6770  | 22.8610 | -0.7930  | H | 0 | -5.8440 | 27.5600 | -10.9880 | H | 0 |
| 0.8420  | 29.7450 | 2.2360  | H | 0 | 6.2330  | 21.2430 | -1.4280  | H | 0 | -3.7810 | 25.0180 | -11.7670 | C | 0 |
| -0.5060 | 29.6210 | 3.1050  | H | 0 | 8.2530  | 21.3520 | -0.6550  | C | 0 | -3.6780 | 24.6310 | -12.9390 | O | 0 |
| 0.2060  | 31.0220 | 3.1370  | H | 0 | 9.5870  | 21.3480 | -1.1590  | N | 0 | -2.7780 | 25.8480 | -11.3130 | N | 0 |
| 6.8230  | 28.0170 | 4.8290  | C | 0 | 10.3460 | 20.6950 | -0.2820  | C | 0 | -2.8840 | 26.3170 | -10.4250 | H | 0 |
| 7.5060  | 29.0630 | 4.6000  | O | 0 | 11.3270 | 20.3900 | -0.6150  | H | 0 | -1.8960 | 26.5710 | -12.2680 | C | 0 |
| 7.4070  | 26.9180 | 5.2350  | N | 0 | 9.5620  | 20.3680 | 0.8080   | N | 0 | -2.4690 | 27.1630 | -12.9820 | H | 0 |
| 6.7400  | 26.1670 | 5.3450  | H | 0 | 9.8410  | 19.8840 | 1.6500   | H | 0 | -0.9880 | 27.5740 | -11.4950 | C | 0 |
| 8.8930  | 26.8010 | 5.5480  | C | 0 | 8.3110  | 20.6760 | 0.5890   | C | 0 | -0.6420 | 27.0940 | -10.5800 | H | 0 |
| 9.3390  | 27.7640 | 5.7960  | H | 0 | 7.4330  | 20.3790 | 1.1430   | H | 0 | -0.1570 | 27.8470 | -12.1450 | H | 0 |
| 9.0650  | 25.9460 | 6.8340  | C | 0 | 5.7840  | 22.9280 | -3.2960  | C | 0 | -1.8030 | 28.8100 | -11.0230 | C | 0 |
| 10.1370 | 25.7540 | 6.8810  | H | 0 | 4.9000  | 21.9960 | -3.2850  | O | 0 | -2.1310 | 29.3490 | -11.9120 | H | 0 |
| 8.7000  | 26.4710 | 7.7160  | H | 0 | 5.4520  | 24.1890 | -3.5310  | N | 0 | -2.7230 | 28.5860 | -10.4840 | H | 0 |
| 8.3240  | 24.6010 | 6.8150  | C | 0 | 6.1880  | 24.8780 | -3.4710  | H | 0 | -0.9810 | 29.7460 | -10.1310 | C | 0 |
| 8.2580  | 24.1600 | 5.8200  | H | 0 | 4.1760  | 24.7150 | -3.9400  | C | 0 | -1.6260 | 30.5910 | -9.8910  | H | 0 |
| 8.8830  | 23.9560 | 7.4930  | H | 0 | 4.3020  | 25.5600 | -4.6170  | H | 0 | -0.6560 | 29.2500 | -9.2170  | H | 0 |
| 6.9370  | 24.6990 | 7.4580  | C | 0 | 3.7370  | 23.9840 | -4.6200  | H | 0 | 0.3150  | 30.2880 | -10.8100 | C | 0 |
| 6.8420  | 24.7000 | 8.6700  | O | 0 | 3.2410  | 25.1370 | -2.8080  | C | 0 | 0.8760  | 30.9710 | -10.1720 | H | 0 |
| 5.9570  | 24.7510 | 6.7410  | O | 0 | 3.4420  | 24.7320 | -1.6630  | O | 0 | 1.0550  | 29.5150 | -11.0150 | H | 0 |
| 9.7870  | 26.1760 | 4.4050  | C | 0 | 2.1580  | 25.8520 | -3.1950  | N | 0 | -0.0080 | 31.1910 | -11.9360 | N | 0 |
| 10.9790 | 26.3710 | 4.3870  | O | 0 | 1.9320  | 25.9980 | -4.1680  | H | 0 | -0.5400 | 32.0130 | -11.6880 | H | 0 |
| 9.2330  | 25.5620 | 3.4130  | N | 0 | 1.1660  | 26.4450 | -2.3100  | C | 0 | 0.8340  | 31.5260 | -12.3820 | H | 0 |
| 8.2510  | 25.3370 | 3.4880  | H | 0 | 1.1250  | 25.7310 | -1.4860  | H | 0 | -0.3970 | 30.5820 | -12.6420 | H | 0 |
| 9.9470  | 25.0200 | 2.2000  | C | 0 | 1.6240  | 27.3650 | -1.9470  | H | 0 | -0.9340 | 25.6490 | -13.0670 | C | 0 |
| 10.9350 | 25.4670 | 2.0900  | H | 0 | -0.2720 | 26.6110 | -2.9070  | C | 0 | -0.4170 | 25.9180 | -14.1680 | O | 0 |
| 10.1570 | 23.4910 | 2.5810  | C | 0 | -0.6320 | 25.9290 | -3.8110  | O | 0 | -0.6190 | 24.4490 | -12.4310 | N | 0 |
| 9.1760  | 23.0520 | 2.7610  | H | 0 | -1.0740 | 27.5850 | -2.4540  | N | 0 | -1.0660 | 24.3520 | -11.5310 | H | 0 |
| 10.4380 | 22.9200 | 1.6960  | H | 0 | -0.7340 | 28.6080 | -1.4760  | C | 0 | 0.3570  | 23.5390 | -12.9300 | C | 0 |
| 11.0220 | 23.2050 | 3.7830  | C | 0 | 0.2450  | 28.9310 | -1.8320  | H | 0 | 1.0590  | 24.1580 | -13.4890 | H | 0 |
| 12.3840 | 23.5480 | 3.8630  | C | 0 | -0.7110 | 28.1790 | -0.4740  | H | 0 | 1.1520  | 22.8950 | -11.7820 | C | 0 |
| 12.8540 | 23.9890 | 2.9950  | H | 0 | -1.7180 | 29.8400 | -1.6090  | C | 0 | 1.9130  | 22.2750 | -12.2560 | H | 0 |
| 13.2250 | 23.2480 | 4.9780  | C | 0 | -1.3310 | 30.6500 | -2.2270  | H | 0 | 1.9460  | 23.9060 | -10.9130 | C | 0 |
| 14.2510 | 23.5820 | 5.0340  | H | 0 | -2.0650 | 30.2240 | -0.6490  | H | 0 | 2.3940  | 23.3390 | -10.0970 | H | 0 |
| 12.5960 | 22.6940 | 6.1200  | C | 0 | -2.8720 | 29.0760 | -2.1990  | C | 0 | 2.7860  | 24.3320 | -11.4620 | H | 0 |
| 13.2670 | 22.4440 | 6.9280  | H | 0 | -3.4740 | 29.7920 | -2.7580  | H | 0 | 1.3230  | 24.7760 | -10.7060 | H | 0 |
| 11.2400 | 22.2360 | 6.0150  | C | 0 | -3.5390 | 28.7170 | -1.4150  | H | 0 | 0.2600  | 22.1160 | -11.0510 | O | 0 |
| 10.8660 | 21.7240 | 6.8890  | H | 0 | -2.3120 | 27.9670 | -3.0980  | C | 0 | -0.3520 | 22.6380 | -10.5270 | H | 0 |
| 10.4360 | 22.5460 | 4.8560  | C | 0 | -3.0000 | 27.1220 | -3.0570  | H | 0 | -0.2690 | 22.5090 | -13.9040 | C | 0 |
| 9.4070  | 22.2170 | 4.8290  | H | 0 | -2.1940 | 28.3620 | -4.5860  | C | 0 | 0.3500  | 21.4710 | -14.3080 | O | 0 |
| 9.1360  | 25.2720 | 0.9030  | C | 0 | -1.1530 | 28.8410 | -5.0580  | O | 0 | -1.4880 | 22.7430 | -14.3440 | N | 0 |
| 8.8130  | 24.3420 | 0.1560  | O | 0 | -3.3180 | 28.1910 | -5.2990  | N | 0 | -1.9640 | 23.5180 | -13.9040 | H | 0 |
| 8.6750  | 26.4840 | 0.5720  | N | 0 | -4.1740 | 27.8420 | -4.8920  | H | 0 | -2.2090 | 21.9100 | -15.3220 | C | 0 |
| 8.8600  | 27.7110 | 1.3790  | C | 0 | -3.3610 | 28.2150 | -6.7440  | C | 0 | -1.6150 | 21.0610 | -15.6600 | H | 0 |
| 9.9100  | 27.9300 | 1.5750  | H | 0 | -4.3690 | 28.3270 | -7.1440  | H | 0 | -3.5430 | 21.4630 | -14.7180 | C | 0 |
| 8.3600  | 27.6130 | 2.3430  | H | 0 | -2.8160 | 29.1330 | -6.9640  | H | 0 | -4.1160 | 22.3650 | -14.5030 | H | 0 |
| 8.2650  | 28.8410 | 0.5390  | C | 0 | -2.6530 | 27.1060 | -7.5480  | C | 0 | -3.9220 | 20.9250 | -15.5870 | H | 0 |
| 8.9510  | 29.3700 | -0.1220 | H | 0 | -3.1830 | 26.8270 | -8.6420  | O | 0 | -3.5680 | 20.5280 | -13.5290 | C | 0 |
| 7.8100  | 29.6220 | 1.1490  | H | 0 | -1.5850 | 26.4330 | -7.0730  | N | 0 | -3.4880 | 20.8290 | -12.2160 | C | 0 |
| 7.1240  | 28.1540 | -0.2290 | C | 0 | -1.4250 | 26.4250 | -6.0760  | H | 0 | -3.3730 | 21.8450 | -11.8670 | H | 0 |
| 7.0080  | 28.6380 | -1.1980 | H | 0 | -0.8150 | 25.5170 | -7.8860  | C | 0 | -3.5310 | 19.6420 | -11.4650 | N | 0 |
| 6.2070  | 28.1180 | 0.3590  | H | 0 | -0.4720 | 26.1270 | -8.7220  | H | 0 | -3.3840 | 19.6940 | -10.4670 | H | 0 |
| 7.6460  | 26.7780 | -0.4370 | C | 0 | 0.4150  | 25.0110 | -7.1300  | C | 0 | -3.5030 | 18.5170 | -12.2390 | C | 0 |
| 6.9370  | 25.9510 | -0.3930 | H | 0 | 0.1240  | 24.5820 | -6.1710  | H | 0 | -3.4030 | 17.1580 | -11.9610 | C | 0 |
| 8.0790  | 26.4720 | -1.8730 | C | 0 | 0.8430  | 24.3370 | -7.8720  | H | 0 | -3.3440 | 16.8380 | -10.9310 | H | 0 |
| 7.3140  | 26.5480 | -2.8340 | O | 0 | 1.4750  | 26.0980 | -6.9490  | C | 0 | -3.5010 | 16.2820 | -12.9930 | C | 0 |
| 9.3440  | 26.0690 | -2.0830 | N | 0 | 2.3890  | 25.8430 | -6.1830  | O | 0 | -3.3850 | 15.2160 | -12.8690 | H | 0 |
| 9.7860  | 25.8040 | -1.2140 | H | 0 | 1.4270  | 27.1090 | -7.6350  | O | 0 | -3.6110 | 16.7630 | -14.3670 | C | 0 |
| 9.7370  | 25.3490 | -3.2500 | C | 0 | -1.6040 | 24.3150 | -8.2710  | C | 0 | -3.7770 | 16.0660 | -15.1750 | H | 0 |
| 9.5300  | 25.9310 | -4.1490 | H | 0 | -1.4110 | 23.8170 | -9.3720  | O | 0 | -3.8410 | 18.1340 | -14.5520 | C | 0 |
| 11.2600 | 25.0800 | -3.3240 | C | 0 | -2.5640 | 23.8430 | -7.4400  | N | 0 | -4.0110 | 18.3750 | -15.5910 | H | 0 |
| 11.5890 | 24.7800 | -4.3200 | H | 0 | -2.7570 | 24.2990 | -6.5600  | H | 0 | -3.6310 | 19.0620 | -13.5580 | C | 0 |
| 11.8040 | 26.0220 | -3.2600 | H | 0 | -3.4160 | 22.7820 | -7.9060  | C | 0 | -2.5110 | 22.7060 | -16.5810 | C | 0 |
| 11.9040 | 24.1120 | -2.4350 | C | 0 | -2.8540 | 21.8860 | -8.1710  | H | 0 | -2.8820 | 23.8780 | -16.5090 | O | 0 |
| 11.3070 | 23.2010 | -2.3970 | H | 0 | -4.0330 | 22.3930 | -7.0950  | H | 0 | -2.3440 | 22.0940 | -17.7730 | N | 0 |
| 12.8100 | 23.7970 | -2.9530 | H | 0 | -4.2910 | 23.1380 | -9.1140  | C | 0 | -1.6890 | 20.7490 | -18.0190 | C | 0 |
| 12.2900 | 24.5380 | -1.0370 | C | 0 | -4.6780 | 22.1230 | -9.6850  | O | 0 | -2.1690 | 19.9970 | -17.3930 | H | 0 |
| 11.9150 | 25.4620 | -0.4050 | O | 0 | -4.5720 | 24.3980 | -9.4670  | N | 0 | -0.6110 | 20.8660 | -17.9100 | H | 0 |
| 13.0890 | 23.6740 | -0.4530 | N | 0 | -4.2160 | 25.1710 | -8.9230  | H | 0 | -2.0780 | 20.4090 | -19.5000 | C | 0 |
| 13.4220 | 23.8160 | 0.4890  | H | 0 | -4.9640 | 24.6150 | -10.8620 | C | 0 | -3.0350 | 19.8880 | -19.5080 | H | 0 |

|          |         |          |   |   |          |         |          |   |   |         |         |         |   |   |
|----------|---------|----------|---|---|----------|---------|----------|---|---|---------|---------|---------|---|---|
| -1.2730  | 19.8490 | -19.9760 | H | 0 | -12.9060 | 17.9160 | -13.5290 | H | 0 | -5.4650 | 6.5110  | -0.0860 | H | 0 |
| -2.3090  | 21.7160 | -20.1580 | C | 0 | -12.2870 | 19.9980 | -13.4120 | C | 0 | -3.9530 | 6.9400  | -0.8280 | H | 0 |
| -3.0090  | 21.6830 | -20.9930 | H | 0 | -12.6250 | 20.0370 | -12.3770 | H | 0 | -4.8620 | 8.0960  | 0.1710  | H | 0 |
| -1.3340  | 22.1120 | -20.4400 | H | 0 | -11.3120 | 20.4850 | -13.4290 | H | 0 | -4.9860 | 9.0720  | -2.0200 | O | 0 |
| -2.8000  | 22.6560 | -19.0380 | C | 0 | -13.2660 | 20.6510 | -14.2980 | C | 0 | -4.0810 | 8.7640  | -1.9400 | H | 0 |
| -2.3250  | 23.6340 | -19.1130 | H | 0 | -12.8970 | 20.5250 | -15.3160 | H | 0 | -6.2860 | 5.5990  | -2.6750 | C | 0 |
| -4.3890  | 22.8510 | -19.0200 | C | 0 | -14.2760 | 20.2780 | -14.1290 | H | 0 | -7.4410 | 5.4530  | -2.2330 | O | 0 |
| -5.1420  | 21.8800 | -18.7730 | O | 0 | -13.2530 | 22.1440 | -13.9790 | C | 0 | -5.5390 | 4.5950  | -2.8280 | N | 0 |
| -4.8580  | 24.1090 | -19.2780 | N | 0 | -13.0440 | 22.2320 | -12.9130 | H | 0 | -4.6770 | 4.7140  | -3.3400 | H | 0 |
| -4.2020  | 24.8040 | -19.6070 | H | 0 | -12.5600 | 22.6990 | -14.6120 | H | 0 | -6.0400 | 3.1960  | -2.8930 | C | 0 |
| -6.3080  | 24.3820 | -19.1760 | C | 0 | -14.6130 | 22.7050 | -14.1600 | N | 0 | -6.8450 | 3.0710  | -2.1690 | H | 0 |
| -6.5550  | 25.4440 | -19.1830 | H | 0 | -15.2470 | 22.2100 | -13.5490 | H | 0 | -6.2930 | 2.6790  | -4.3360 | C | 0 |
| -6.6230  | 24.0840 | -20.1750 | H | 0 | -14.6700 | 23.6880 | -13.9330 | H | 0 | -6.6370 | 1.6450  | -4.3440 | H | 0 |
| -7.0600  | 23.7440 | -17.9630 | C | 0 | -14.9590 | 22.7160 | -15.1090 | H | 0 | -7.1400 | 3.2400  | -4.7310 | H | 0 |
| -6.5030  | 23.6910 | -16.8690 | O | 0 | -10.7260 | 16.3020 | -13.3900 | C | 0 | -5.0660 | 2.7600  | -5.2360 | C | 0 |
| -8.2410  | 23.2280 | -18.1360 | N | 0 | -11.4930 | 15.4600 | -12.9930 | O | 0 | -4.6320 | 3.8930  | -5.7840 | C | 0 |
| -8.6670  | 23.3120 | -19.0480 | H | 0 | -9.8110  | 16.0230 | -14.3100 | N | 0 | -5.1120 | 4.8600  | -5.7520 | H | 0 |
| -9.0190  | 22.6730 | -17.0960 | C | 0 | -9.3250  | 16.8680 | -14.5750 | H | 0 | -3.4180 | 3.5920  | -6.4480 | N | 0 |
| -8.7290  | 23.0750 | -16.1250 | H | 0 | -9.4800  | 14.6920 | -14.8480 | C | 0 | -2.9150 | 4.3630  | -6.8660 | H | 0 |
| -10.4680 | 23.0750 | -17.3530 | C | 0 | -10.2940 | 13.9770 | -14.7290 | H | 0 | -2.9880 | 2.2910  | -6.2220 | C | 0 |
| -10.9050 | 22.5070 | -18.1740 | H | 0 | -9.2880  | 14.9170 | -16.4110 | C | 0 | -1.9480 | 1.5340  | -6.7720 | C | 0 |
| -11.0570 | 22.6740 | -16.5280 | H | 0 | -8.2580  | 15.1120 | -16.7120 | H | 0 | -1.2100 | 1.9590  | -7.4360 | H | 0 |
| -10.8940 | 24.5820 | -17.3670 | C | 0 | -9.4200  | 13.9370 | -16.8710 | H | 0 | -1.8270 | 0.1330  | -6.4040 | C | 0 |
| -10.7800 | 24.9760 | -18.3770 | H | 0 | -10.2550 | 15.7440 | -17.2080 | C | 0 | -1.1330 | -0.5060 | -6.9290 | H | 0 |
| -11.9230 | 24.7280 | -17.0400 | H | 0 | -10.0650 | 16.7640 | -16.8720 | H | 0 | -2.9070 | -0.4680 | -5.7290 | C | 0 |
| -10.0690 | 25.5400 | -16.4200 | C | 0 | -9.9600  | 15.7820 | -18.7280 | C | 0 | -3.0130 | -1.5380 | -5.6310 | H | 0 |
| -9.9810  | 25.1280 | -15.2160 | O | 0 | -9.6020  | 14.7870 | -18.9960 | H | 0 | -3.9300 | 0.3230  | -5.1840 | C | 0 |
| -9.6020  | 26.5970 | -16.8790 | O | 0 | -10.9280 | 15.8960 | -19.2150 | H | 0 | -4.6570 | -0.0500 | -4.4780 | H | 0 |
| -8.7750  | 21.1730 | -16.8330 | C | 0 | -9.2120  | 16.5480 | -18.9330 | H | 0 | -4.0810 | 1.7090  | -5.4740 | C | 0 |
| -9.5540  | 20.4480 | -16.2660 | O | 0 | -11.7470 | 15.4440 | -16.9600 | C | 0 | -5.0000 | 2.2100  | -2.3290 | C | 0 |
| -7.6210  | 20.6370 | -17.2320 | N | 0 | -12.3460 | 16.1590 | -17.5260 | H | 0 | -5.3640 | 1.0600  | -2.0430 | O | 0 |
| -6.9880  | 21.2700 | -17.7000 | H | 0 | -11.9770 | 14.4190 | -17.2490 | H | 0 | -3.7040 | 2.6380  | -2.1410 | N | 0 |
| -7.2450  | 19.1440 | -17.1870 | C | 0 | -11.9690 | 15.5240 | -15.8960 | H | 0 | -3.4350 | 3.5830  | -5.3780 | H | 0 |
| -8.0020  | 18.4890 | -17.6180 | H | 0 | -8.2410  | 14.0840 | -14.1570 | C | 0 | -2.7550 | 2.1250  | -1.1330 | C | 0 |
| -5.9350  | 18.9100 | -17.8880 | C | 0 | -7.7390  | 13.1030 | -14.6110 | O | 0 | -2.5200 | 1.0740  | -1.2980 | H | 0 |
| -6.0790  | 19.1350 | -18.9450 | H | 0 | -7.7380  | 14.7090 | -13.0350 | N | 0 | -1.8100 | 2.5970  | -1.4050 | H | 0 |
| -5.2350  | 19.6520 | -17.5030 | H | 0 | -8.2080  | 15.5360 | -12.6960 | H | 0 | -3.1310 | 2.3700  | 0.3460  | C | 0 |
| -5.2780  | 17.5400 | -17.9760 | C | 0 | -6.2780  | 14.6750 | -12.8330 | C | 0 | -4.0500 | 1.7590  | 0.8650  | O | 0 |
| -4.2130  | 17.6710 | -18.1690 | H | 0 | -5.6770  | 14.5890 | -13.7380 | H | 0 | -2.2770 | 3.1780  | 0.9740  | N | 0 |
| -5.2900  | 17.0230 | -17.0160 | H | 0 | -5.9060  | 15.6330 | -12.4700 | H | 0 | -1.5280 | 3.5720  | 0.4230  | H | 0 |
| -5.7950  | 16.5650 | -19.0070 | C | 0 | -5.7800  | 13.5530 | -11.9060 | C | 0 | -2.2630 | 3.3430  | 2.3670  | C | 0 |
| -6.1840  | 16.9730 | -20.1140 | O | 0 | -4.7430  | 13.7550 | -11.2880 | O | 0 | -3.1230 | 2.7710  | 2.7150  | H | 0 |
| -6.1180  | 15.3440 | -18.6680 | N | 0 | -6.4660  | 12.3880 | -11.8340 | N | 0 | -1.0100 | 2.6780  | 2.9760  | C | 0 |
| -6.6100  | 14.7660 | -19.3340 | H | 0 | -7.4560  | 12.3470 | -12.0310 | H | 0 | -0.1190 | 3.1290  | 2.5380  | H | 0 |
| -5.8030  | 14.9210 | -17.8060 | H | 0 | -6.0050  | 11.3160 | -10.8920 | C | 0 | -1.0620 | 2.6680  | 4.0640  | H | 0 |
| -7.3100  | 18.6310 | -15.7100 | C | 0 | -6.7770  | 10.5470 | -10.8800 | H | 0 | -0.8660 | 1.2810  | 2.5810  | C | 0 |
| -7.5300  | 17.4800 | -15.5170 | O | 0 | -5.0590  | 10.8930 | -11.2300 | H | 0 | -0.0270 | 0.8330  | 1.6510  | C | 0 |
| -7.1830  | 19.5230 | -14.7100 | N | 0 | -5.9960  | 11.7610 | -9.4180  | C | 0 | 0.5600  | 1.4990  | 1.0350  | H | 0 |
| -7.1950  | 20.4870 | -15.0140 | H | 0 | -6.8990  | 12.2610 | -8.7920  | O | 0 | -0.0840 | -0.5510 | 1.5330  | N | 0 |
| -7.1990  | 19.1330 | -13.2780 | C | 0 | -4.7730  | 11.5750 | -8.9090  | N | 0 | 0.5790  | -1.0800 | 0.9840  | H | 0 |
| -6.3910  | 18.4220 | -13.1080 | H | 0 | -4.0470  | 11.1840 | -9.4910  | H | 0 | -0.9540 | -1.0440 | 2.4410  | C | 0 |
| -7.0960  | 20.3520 | -12.3720 | C | 0 | -4.4560  | 11.8140 | -7.5010  | C | 0 | -1.2800 | -2.4130 | 2.7420  | C | 0 |
| -7.1130  | 19.9680 | -11.3520 | H | 0 | -3.3930  | 11.6690 | -7.3070  | H | 0 | -0.7710 | -3.1690 | 2.1620  | H | 0 |
| -6.1140  | 20.7990 | -12.5270 | H | 0 | -4.7990  | 12.8300 | -7.3040  | H | 0 | -2.0880 | -2.6170 | 3.8850  | C | 0 |
| -8.0510  | 21.4600 | -12.5050 | C | 0 | -5.1260  | 10.9410 | -6.5690  | C | 0 | -2.3330 | -3.6240 | 4.1870  | H | 0 |
| -7.9580  | 22.4400 | -13.4130 | C | 0 | -5.2160  | 11.1980 | -5.3290  | O | 0 | -2.5500 | -1.5540 | 4.6350  | C | 0 |
| -7.1610  | 22.5610 | -14.1320 | H | 0 | -5.6860  | 9.8610  | -7.0920  | N | 0 | -3.1380 | -1.7250 | 5.5250  | H | 0 |
| -9.1450  | 23.1880 | -13.3790 | N | 0 | -5.5980  | 9.8140  | -8.0970  | H | 0 | -2.2550 | -0.2170 | 4.2430  | C | 0 |
| -9.4200  | 23.9610 | -13.9690 | H | 0 | -6.5040  | 8.8520  | -6.4370  | C | 0 | -2.6700 | 0.5990  | 4.8160  | H | 0 |
| -9.8640  | 22.8450 | -12.2710 | C | 0 | -7.3090  | 9.3570  | -5.9040  | H | 0 | -1.4330 | 0.0530  | 3.1140  | C | 0 |
| -11.0910 | 23.3640 | -11.8910 | C | 0 | -7.1150  | 7.9110  | -7.4880  | C | 0 | -2.1810 | 4.7740  | 2.8390  | C | 0 |
| -11.5350 | 24.2580 | -12.3040 | H | 0 | -7.6390  | 7.0640  | -7.0460  | H | 0 | -1.7720 | 5.7040  | 2.1400  | O | 0 |
| -11.7880 | 22.6510 | -10.9530 | C | 0 | -8.2760  | 8.7630  | -8.1000  | C | 0 | -2.4550 | 4.8860  | 4.1220  | N | 0 |
| -12.7550 | 22.9180 | -10.5510 | H | 0 | -7.9020  | 9.7660  | -8.3030  | H | 0 | -2.4570 | 4.0970  | 4.7520  | H | 0 |
| -11.3980 | 21.4080 | -10.5050 | C | 0 | -8.6720  | 8.2600  | -8.9830  | H | 0 | -2.4910 | 6.1080  | 4.9760  | C | 0 |
| -12.1030 | 20.8780 | -9.8830  | H | 0 | -9.0980  | 8.6900  | -7.3880  | H | 0 | -1.6280 | 6.6430  | 4.5800  | H | 0 |
| -10.0350 | 20.9950 | -10.8010 | C | 0 | -6.1720  | 7.5610  | -8.5020  | O | 0 | -3.7730 | 6.8690  | 4.8120  | C | 0 |
| -9.6640  | 20.0870 | -10.3510 | H | 0 | -6.0740  | 6.6090  | -8.5710  | H | 0 | -4.2770 | 7.0790  | 5.7550  | H | 0 |
| -9.2920  | 21.6330 | -11.7780 | C | 0 | -5.7030  | 8.0560  | -5.3480  | C | 0 | -3.4820 | 7.8130  | 4.3510  | H | 0 |
| -8.4620  | 18.3310 | -12.8870 | C | 0 | -4.4610  | 8.0570  | -5.3810  | O | 0 | -4.8620 | 6.2380  | 3.9570  | C | 0 |
| -8.3250  | 17.4590 | -12.0930 | O | 0 | -6.3050  | 7.5340  | -4.3210  | N | 0 | -5.5680 | 6.9970  | 3.0000  | C | 0 |
| -9.6500  | 18.5440 | -13.4240 | N | 0 | -7.3130  | 7.5820  | -4.3340  | H | 0 | -5.3140 | 8.0070  | 2.7150  | H | 0 |
| -9.6050  | 19.1300 | -14.2450 | H | 0 | -5.6440  | 6.9260  | -3.0860  | C | 0 | -6.7740 | 6.5430  | 2.4090  | C | 0 |
| -10.8750 | 17.8150 | -13.1120 | C | 0 | -4.5790  | 6.8680  | -3.3140  | H | 0 | -7.2150 | 7.1440  | 1.6270  | H | 0 |
| -11.0190 | 17.8530 | -12.0320 | H | 0 | -5.7050  | 7.9230  | -1.8100  | C | 0 | -7.2460 | 5.2820  | 2.7440  | C | 0 |
| -12.0590 | 18.5350 | -13.8250 | C | 0 | -6.7700  | 8.1340  | -1.7090  | H | 0 | -8.4590 | 4.8610  | 2.2490  | O | 0 |
| -12.0280 | 18.4250 | -14.9090 | H | 0 | -4.9460  | 7.3240  | -0.5940  | C | 0 | -8.7100 | 4.1420  | 2.8330  | H | 0 |

|         |         |         |   |   |         |         |         |   |   |         |         |          |   |   |
|---------|---------|---------|---|---|---------|---------|---------|---|---|---------|---------|----------|---|---|
| -6.6190 | 4.5320  | 3.7090  | C | 0 | 1.8300  | 16.2790 | 16.7860 | H | 0 | 1.7330  | 12.0340 | 10.0060  | C | 0 |
| -7.0370 | 3.6040  | 4.0700  | H | 0 | 2.2070  | 15.1190 | 15.0130 | C | 0 | 1.5910  | 11.7230 | 11.0310  | H | 0 |
| -5.4030 | 4.9670  | 4.2900  | C | 0 | 1.8110  | 14.1830 | 14.6170 | H | 0 | 2.4890  | 13.2220 | 9.7610   | C | 0 |
| -5.0930 | 4.4170  | 5.1670  | H | 0 | 2.0450  | 15.9230 | 14.2950 | H | 0 | 2.9960  | 13.9060 | 10.8600  | O | 0 |
| -2.0320 | 5.7970  | 6.4310  | C | 0 | 3.7190  | 14.9880 | 15.3000 | C | 0 | 3.3960  | 14.7230 | 10.5540  | H | 0 |
| -2.1110 | 4.6590  | 6.7620  | O | 0 | 3.8190  | 14.2850 | 16.1280 | H | 0 | 2.6560  | 13.5830 | 8.4180   | C | 0 |
| -1.6630 | 6.7930  | 7.1530  | N | 0 | 4.6580  | 14.4520 | 14.2070 | C | 0 | 3.2720  | 14.4620 | 8.2990   | H | 0 |
| -1.6770 | 7.7430  | 6.8100  | H | 0 | 4.2350  | 13.5200 | 13.8320 | H | 0 | 2.1410  | 12.8580 | 7.3370   | C | 0 |
| -1.2200 | 6.6300  | 8.5620  | C | 0 | 4.8120  | 15.1740 | 13.4050 | H | 0 | 2.2510  | 13.1950 | 6.3170   | H | 0 |
| -1.8060 | 5.8570  | 9.0600  | H | 0 | 5.6070  | 14.2540 | 14.7060 | H | 0 | -1.1300 | 10.2080 | 4.9760   | C | 0 |
| 0.2980  | 6.3450  | 8.5500  | C | 0 | 4.2730  | 16.3620 | 15.7200 | C | 0 | -1.2450 | 8.9860  | 5.2710   | O | 0 |
| 0.5660  | 6.2110  | 9.5980  | H | 0 | 5.3070  | 16.2800 | 16.0540 | H | 0 | -1.3150 | 10.7160 | 3.7550   | N | 0 |
| 0.6240  | 5.4840  | 7.9650  | H | 0 | 4.3930  | 16.9530 | 14.8120 | H | 0 | -1.2190 | 11.7140 | 3.6370   | H | 0 |
| 0.9850  | 7.5420  | 8.1370  | O | 0 | 3.6550  | 16.8470 | 16.4760 | H | 0 | -1.6260 | 9.8260  | 2.6210   | C | 0 |
| 1.9220  | 7.3960  | 8.2860  | H | 0 | -0.0110 | 15.8220 | 15.8360 | C | 0 | -1.3140 | 8.8110  | 2.8650   | H | 0 |
| -1.5400 | 7.8780  | 9.4550  | C | 0 | -0.2350 | 16.9890 | 15.3860 | O | 0 | -3.2260 | 9.8420  | 2.4700   | C | 0 |
| -1.8480 | 8.9850  | 8.9380  | O | 0 | -1.0080 | 14.9380 | 16.0200 | N | 0 | -3.5100 | 8.8730  | 2.0610   | H | 0 |
| -1.4300 | 7.7720  | 10.7650 | N | 0 | -0.7270 | 14.0580 | 16.4270 | H | 0 | -3.6070 | 9.9280  | 3.4870   | H | 0 |
| -1.1630 | 6.8690  | 11.1300 | H | 0 | -2.3800 | 15.0510 | 15.5650 | C | 0 | -3.8090 | 11.0060 | 1.6490   | C | 0 |
| -1.7240 | 8.8530  | 11.7340 | C | 0 | -2.7460 | 14.0430 | 15.7560 | H | 0 | -4.3890 | 12.2070 | 2.1480   | C | 0 |
| -1.4970 | 9.8360  | 11.3200 | H | 0 | -3.0920 | 16.0370 | 16.3670 | C | 0 | -4.4140 | 12.4870 | 3.1910   | H | 0 |
| -3.2330 | 8.8330  | 12.0280 | C | 0 | -2.7730 | 15.9360 | 17.4040 | H | 0 | -5.0730 | 13.1120 | 1.2800   | C | 0 |
| -3.8050 | 9.1450  | 11.1550 | H | 0 | -2.7270 | 17.0160 | 16.0560 | H | 0 | -5.4090 | 14.1020 | 1.5520   | H | 0 |
| -3.4920 | 7.8020  | 12.2710 | H | 0 | -4.5720 | 16.8050 | 16.2160 | C | 0 | -5.1340 | 12.8580 | -0.0560  | C | 0 |
| -3.6310 | 9.8350  | 13.1770 | C | 0 | -5.0950 | 14.8050 | 15.7840 | O | 0 | -5.5120 | 13.7900 | -0.9680  | O | 0 |
| -3.6630 | 11.2210 | 12.8940 | C | 0 | -5.1750 | 16.8670 | 16.3400 | O | 0 | -5.5670 | 13.4310 | -1.8570  | H | 0 |
| -3.6020 | 11.5570 | 11.8690 | H | 0 | -2.4240 | 15.3040 | 14.0690 | C | 0 | -4.6030 | 11.6130 | -0.5080  | C | 0 |
| -4.2230 | 12.1060 | 13.8400 | C | 0 | -3.1000 | 16.2530 | 13.5780 | O | 0 | -4.7410 | 11.3630 | -1.5500  | H | 0 |
| -4.2310 | 13.1740 | 13.6800 | H | 0 | -1.6840 | 14.4530 | 13.2930 | N | 0 | -3.8910 | 10.7270 | 0.2980   | C | 0 |
| -4.6370 | 11.5360 | 15.0970 | C | 0 | -0.9800 | 13.9520 | 13.8160 | H | 0 | -3.4970 | 9.8240  | -0.1430  | H | 0 |
| -4.9470 | 12.2750 | 16.2170 | O | 0 | -1.5460 | 14.5070 | 11.8400 | C | 0 | -0.8120 | 10.2290 | 1.4240   | C | 0 |
| -4.9960 | 13.2050 | 15.9830 | H | 0 | -2.2340 | 15.2520 | 11.4410 | H | 0 | -0.2080 | 11.2920 | 1.2100   | O | 0 |
| -4.4450 | 10.2140 | 15.3990 | C | 0 | -0.0930 | 15.0500 | 11.5910 | C | 0 | -0.6370 | 9.2430  | 0.5580   | N | 0 |
| -4.5750 | 9.8800  | 16.4170 | H | 0 | 0.6000  | 14.5960 | 12.2980 | H | 0 | -1.0040 | 8.3250  | 0.7650   | H | 0 |
| -3.9280 | 9.3350  | 14.4700 | C | 0 | 0.2730  | 14.7120 | 10.6220 | H | 0 | -0.0290 | 9.4710  | -0.7880  | C | 0 |
| -3.7490 | 8.2840  | 14.6400 | H | 0 | 0.0640  | 16.5900 | 11.4650 | C | 0 | 0.4400  | 10.4420 | -0.9450  | H | 0 |
| -0.8520 | 8.7770  | 13.0170 | C | 0 | -0.3840 | 16.9950 | 12.3720 | H | 0 | 0.6110  | 8.6060  | -0.9590  | H | 0 |
| -0.6880 | 7.7040  | 13.6200 | O | 0 | 1.5930  | 16.9470 | 11.3610 | C | 0 | -1.0780 | 9.5170  | -1.9170  | C | 0 |
| -0.3130 | 9.8810  | 13.4960 | N | 0 | 1.7300  | 18.0230 | 11.2540 | H | 0 | -2.0810 | 8.8190  | -1.6840  | O | 0 |
| -0.2280 | 10.6680 | 12.8690 | H | 0 | 2.1780  | 16.5640 | 12.1960 | H | 0 | -0.7770 | 10.2240 | -2.9590  | N | 0 |
| 0.3200  | 10.0220 | 14.7750 | C | 0 | 2.1250  | 16.4950 | 10.5230 | H | 0 | 0.0970  | 10.7270 | -3.0270  | H | 0 |
| 0.3850  | 9.0610  | 15.2840 | H | 0 | -0.6360 | 17.2650 | 10.2900 | C | 0 | -1.6270 | 10.2970 | -4.2130  | C | 0 |
| 1.8020  | 10.3840 | 14.5150 | C | 0 | -1.6900 | 16.9900 | 10.2340 | H | 0 | -2.5790 | 9.8380  | -3.9450  | H | 0 |
| 2.2370  | 9.4990  | 14.0510 | H | 0 | -0.6780 | 18.3320 | 10.5120 | H | 0 | -1.9180 | 11.7460 | -4.5720  | C | 0 |
| 1.9600  | 11.1410 | 13.7480 | H | 0 | -0.1840 | 16.9870 | 9.3380  | H | 0 | -2.5950 | 11.8080 | -5.4250  | H | 0 |
| 2.5310  | 10.8340 | 15.7510 | C | 0 | -1.7390 | 13.1360 | 11.1880 | C | 0 | -2.6030 | 12.4630 | -3.4060  | C | 0 |
| 3.5790  | 11.4700 | 15.5590 | O | 0 | -1.0300 | 12.1860 | 11.5090 | O | 0 | -3.5650 | 11.9680 | -3.2740  | H | 0 |
| 2.0720  | 10.7000 | 16.9140 | O | 0 | -2.5020 | 13.0750 | 10.1280 | N | 0 | -2.0210 | 12.4470 | -2.4850  | H | 0 |
| -0.4520 | 10.9900 | 15.7160 | C | 0 | -2.9880 | 13.9000 | 9.8090  | H | 0 | -2.6710 | 13.5120 | -3.6940  | H | 0 |
| -0.3350 | 12.2080 | 15.5420 | O | 0 | -2.5710 | 11.8820 | 9.2520  | C | 0 | -0.8330 | 12.5520 | -4.8340  | O | 0 |
| -1.1170 | 10.5050 | 16.8050 | N | 0 | -1.9300 | 11.1050 | 9.6680  | H | 0 | -1.0960 | 13.4740 | -4.7820  | H | 0 |
| -1.1610 | 9.1510  | 17.3230 | C | 0 | -4.0670 | 11.4260 | 9.1070  | C | 0 | -1.0920 | 9.6810  | -5.4240  | C | 0 |
| -0.1540 | 8.7860  | 17.5260 | H | 0 | -4.0660 | 10.3370 | 9.0790  | H | 0 | 0.0910  | 9.7160  | -5.6700  | O | 0 |
| -1.6580 | 8.5910  | 16.5310 | H | 0 | -4.6780 | 11.7080 | 9.9650  | H | 0 | -1.9600 | 9.0360  | -6.2180  | N | 0 |
| -1.9830 | 9.1130  | 18.6290 | C | 0 | -4.7980 | 11.8700 | 7.8370  | C | 0 | -2.9460 | 9.1170  | -6.0150  | H | 0 |
| -1.2850 | 8.9910  | 19.4570 | H | 0 | -5.7060 | 12.9470 | 7.8650  | C | 0 | -1.6700 | 8.3320  | -7.4410  | C | 0 |
| -2.7150 | 8.3060  | 18.6040 | H | 0 | -5.8830 | 13.4760 | 8.7900  | H | 0 | -0.8710 | 7.6290  | -7.2040  | H | 0 |
| -2.6930 | 10.5140 | 18.6510 | C | 0 | -6.4150 | 13.2970 | 6.6700  | C | 0 | -2.7930 | 7.4340  | -7.8890  | C | 0 |
| -2.7700 | 11.0000 | 19.6240 | H | 0 | -7.0490 | 14.1710 | 6.6730  | H | 0 | -3.6810 | 8.0610  | -7.8190  | H | 0 |
| -3.7140 | 10.3400 | 18.3130 | H | 0 | -6.2500 | 12.4940 | 5.5370  | C | 0 | -2.7220 | 6.9560  | -8.8660  | H | 0 |
| -1.9740 | 11.4010 | 17.6560 | C | 0 | -6.8170 | 12.8050 | 4.6730  | H | 0 | -2.8920 | 6.3720  | -6.9720  | O | 0 |
| -2.6110 | 12.0500 | 17.0540 | H | 0 | -5.4710 | 11.3610 | 5.5340  | C | 0 | -3.3640 | 6.7840  | -6.2440  | H | 0 |
| -1.0680 | 12.4720 | 18.4560 | C | 0 | -5.4850 | 10.7480 | 4.6450  | H | 0 | -1.2900 | 9.2910  | -8.5800  | C | 0 |
| -1.5910 | 13.5300 | 18.7940 | O | 0 | -4.5940 | 11.1740 | 6.6910  | C | 0 | -1.3880 | 10.4990 | -8.4200  | O | 0 |
| 0.1750  | 12.2130 | 18.7770 | N | 0 | -3.8880 | 10.3600 | 6.7660  | H | 0 | -1.0260 | 8.6890  | -9.7330  | N | 0 |
| 0.5890  | 11.4440 | 18.2700 | H | 0 | -1.8920 | 12.1500 | 7.8840  | C | 0 | -0.9200 | 7.6850  | -9.7740  | H | 0 |
| 1.1420  | 13.2160 | 19.4140 | C | 0 | -1.6640 | 13.2870 | 7.4880  | O | 0 | -0.7080 | 9.2350  | -11.0640 | C | 0 |
| 0.6810  | 13.6370 | 20.3070 | H | 0 | -1.4910 | 11.1090 | 7.1790  | N | 0 | 0.3550  | 9.4500  | -10.9580 | H | 0 |
| 2.3130  | 12.3720 | 19.9550 | C | 0 | -1.6110 | 10.2150 | 7.6340  | H | 0 | -0.8870 | 8.2260  | -12.2450 | C | 0 |
| 2.8040  | 11.8050 | 19.1650 | H | 0 | -0.6100 | 11.1650 | 6.0130  | C | 0 | -0.5360 | 8.6540  | -13.1830 | H | 0 |
| 3.1950  | 12.9280 | 20.2730 | H | 0 | -0.6890 | 12.2100 | 5.7130  | H | 0 | -0.1990 | 7.4050  | -12.0450 | H | 0 |
| 2.0570  | 11.6980 | 20.7730 | H | 0 | 0.8060  | 10.8130 | 6.4880  | C | 0 | -2.2350 | 7.6510  | -12.3630 | C | 0 |
| 1.5940  | 14.4060 | 18.5270 | C | 0 | 0.8350  | 9.7630  | 6.7770  | H | 0 | -2.5330 | 6.8220  | -11.5380 | O | 0 |
| 2.0240  | 15.4280 | 19.0490 | O | 0 | 1.4500  | 10.8380 | 5.6100  | H | 0 | -2.8880 | 7.7880  | -13.4820 | N | 0 |
| 1.3500  | 14.2970 | 17.1280 | N | 0 | 1.4490  | 11.6140 | 7.5780  | C | 0 | -3.7480 | 7.2650  | -13.5680 | H | 0 |
| 1.1590  | 13.3220 | 16.9440 | H | 0 | 1.3160  | 11.2100 | 8.9670  | C | 0 | -2.5020 | 8.3000  | -14.2620 | H | 0 |
| 1.3810  | 15.4240 | 16.2790 | C | 0 | 0.9260  | 10.2280 | 9.1900  | H | 0 | -1.5670 | 10.4920 | -11.3760 | C | 0 |

|         |         |          |   |   |         |         |          |   |   |         |         |          |   |   |
|---------|---------|----------|---|---|---------|---------|----------|---|---|---------|---------|----------|---|---|
| -2.6840 | 10.5980 | -10.7870 | O | 0 | 1.2300  | 13.2320 | -19.6420 | H | 0 | 2.8280  | 19.9020 | -24.6930 | H | 0 |
| -1.1360 | 11.3740 | -12.2760 | N | 0 | 3.2520  | 12.4310 | -19.7580 | C | 0 | 4.1040  | 20.9250 | -25.3750 | H | 0 |
| 0.1840  | 11.4830 | -12.8790 | C | 0 | 3.8800  | 12.0910 | -20.5820 | H | 0 | 3.9280  | 19.0710 | -26.4330 | N | 0 |
| 0.1070  | 11.3280 | -13.9550 | H | 0 | 3.7170  | 13.2690 | -19.2390 | H | 0 | 3.2120  | 19.2710 | -27.1180 | H | 0 |
| 0.9630  | 10.8320 | -12.4830 | H | 0 | 3.1280  | 11.6020 | -19.0610 | H | 0 | 4.8790  | 19.0510 | -26.7720 | H | 0 |
| 0.4590  | 12.9270 | -12.6050 | C | 0 | 2.0810  | 14.0610 | -21.3440 | C | 0 | 3.8180  | 18.1000 | -26.1780 | H | 0 |
| 1.2750  | 13.3190 | -13.2110 | H | 0 | 1.9780  | 15.2380 | -20.8900 | O | 0 | 1.8650  | 20.4670 | -20.6700 | C | 0 |
| 0.6510  | 13.0320 | -11.5370 | H | 0 | 2.1590  | 13.8740 | -22.6450 | N | 0 | 0.8340  | 20.7510 | -21.2590 | O | 0 |
| -0.8060 | 13.6350 | -13.0550 | C | 0 | 2.3210  | 12.9310 | -22.9670 | H | 0 | 2.5910  | 21.3330 | -19.9780 | N | 0 |
| -0.7330 | 13.8620 | -14.1190 | H | 0 | 1.9970  | 14.9350 | -23.7590 | C | 0 | 3.3230  | 20.8690 | -19.4590 | H | 0 |
| -0.9230 | 14.5330 | -12.4480 | H | 0 | 2.8110  | 15.6560 | -23.6870 | H | 0 | 1.9480  | 22.6080 | -19.5950 | C | 0 |
| -1.9210 | 12.5940 | -12.5470 | C | 0 | 2.0720  | 14.0510 | -25.0030 | C | 0 | 2.3700  | 23.4150 | -20.1930 | H | 0 |
| -2.2990 | 12.9140 | -11.5760 | H | 0 | 3.0420  | 13.5570 | -25.0560 | H | 0 | 0.8620  | 22.6150 | -19.6910 | H | 0 |
| -3.1430 | 12.3940 | -13.5260 | C | 0 | 1.2700  | 13.3130 | -24.9710 | H | 0 | 2.0470  | 22.9650 | -18.0820 | C | 0 |
| -3.5320 | 13.2720 | -14.3580 | O | 0 | 1.9180  | 14.7520 | -26.4000 | C | 0 | 1.4060  | 23.9160 | -17.7180 | O | 0 |
| -3.8110 | 11.2150 | -13.4960 | N | 0 | 2.3370  | 14.1820 | -27.2300 | H | 0 | 2.6920  | 22.1410 | -17.2540 | N | 0 |
| -3.5500 | 10.5220 | -12.8090 | H | 0 | 0.8520  | 14.8380 | -26.6090 | H | 0 | 2.9240  | 21.2340 | -17.6320 | H | 0 |
| -4.7740 | 10.7850 | -14.5440 | C | 0 | 2.6540  | 16.1390 | -26.4270 | C | 0 | 2.9750  | 22.4020 | -15.9030 | C | 0 |
| -5.3030 | 9.8810  | -14.2440 | H | 0 | 3.8710  | 16.2150 | -26.0310 | O | 0 | 3.7160  | 23.1990 | -15.8450 | H | 0 |
| -5.4560 | 11.5910 | -14.8150 | H | 0 | 2.0700  | 17.1500 | -26.9310 | O | 0 | 2.1030  | 22.8220 | -15.4020 | H | 0 |
| -3.9980 | 10.3290 | -15.7940 | C | 0 | 0.7090  | 15.6550 | -23.7410 | C | 0 | 3.2060  | 21.1020 | -15.0660 | C | 0 |
| -3.1450 | 9.3660  | -15.7280 | O | 0 | 0.6230  | 16.9070 | -23.8250 | O | 0 | 3.1110  | 19.9880 | -15.5500 | O | 0 |
| -4.3500 | 10.8440 | -16.9580 | N | 0 | -0.3680 | 15.0070 | -23.3940 | N | 0 | 3.6510  | 21.2580 | -13.7680 | N | 0 |
| -4.8590 | 11.7160 | -16.9410 | H | 0 | -0.3000 | 14.0210 | -23.1870 | H | 0 | 3.8570  | 22.2170 | -13.5280 | H | 0 |
| -3.9370 | 10.1200 | -18.1930 | C | 0 | -1.6780 | 15.6630 | -23.2310 | C | 0 | 3.9840  | 20.2710 | -12.7170 | C | 0 |
| -4.3050 | 9.0950  | -18.1390 | H | 0 | -1.9600 | 16.3250 | -24.0500 | H | 0 | 4.8100  | 19.7260 | -13.1760 | H | 0 |
| -4.4750 | 10.8190 | -19.4930 | C | 0 | -2.6750 | 14.5630 | -23.0740 | C | 0 | 4.5910  | 20.9570 | -11.4560 | C | 0 |
| -5.5530 | 10.9500 | -19.5810 | H | 0 | -2.3730 | 13.9020 | -22.2620 | H | 0 | 3.8000  | 21.5720 | -11.0280 | H | 0 |
| -3.9160 | 12.2240 | -19.6410 | C | 0 | -3.5540 | 15.0170 | -22.6170 | H | 0 | 4.8910  | 20.1300 | -10.8130 | H | 0 |
| -4.5910 | 12.9800 | -20.0420 | H | 0 | -3.0570 | 13.8270 | -24.3500 | C | 0 | 5.8540  | 21.8400 | -11.6050 | C | 0 |
| -3.6650 | 12.5540 | -18.6330 | H | 0 | -3.5080 | 14.5230 | -25.0570 | H | 0 | 5.7810  | 23.0320 | -11.2200 | O | 0 |
| -2.9730 | 12.0640 | -20.1630 | H | 0 | -2.1350 | 13.4440 | -24.7900 | H | 0 | 6.8920  | 21.3790 | -12.1100 | O | 0 |
| -4.1840 | 10.0280 | -20.6200 | O | 0 | -3.9470 | 12.6220 | -24.1730 | C | 0 | 2.9000  | 19.2160 | -12.2490 | C | 0 |
| -4.7690 | 9.2710  | -20.5450 | H | 0 | -3.7620 | 11.5470 | -24.8200 | O | 0 | 3.2050  | 18.2940 | -11.5150 | O | 0 |
| -2.4200 | 9.7980  | -18.2960 | C | 0 | -5.0130 | 12.6680 | -23.3820 | N | 0 | 1.6760  | 19.5300 | -12.6890 | N | 0 |
| -1.5170 | 10.6470 | -18.0580 | O | 0 | -5.6500 | 11.9570 | -23.7120 | H | 0 | 1.5280  | 20.3240 | -13.2960 | H | 0 |
| -2.0100 | 8.5810  | -18.7190 | N | 0 | -5.3260 | 13.4780 | -22.8660 | H | 0 | 0.4720  | 18.7080 | -12.4270 | C | 0 |
| -2.6830 | 7.8490  | -18.8950 | H | 0 | -1.6670 | 16.5070 | -21.9180 | C | 0 | -0.4220 | 19.2610 | -12.7150 | H | 0 |
| -0.6100 | 8.1650  | -18.7730 | C | 0 | -2.5160 | 17.3360 | -21.7860 | O | 0 | 0.4980  | 17.3720 | -13.2720 | C | 0 |
| -0.0980 | 8.6090  | -17.9190 | H | 0 | -0.7550 | 16.2460 | -20.9070 | N | 0 | 1.1750  | 16.6460 | -12.8210 | H | 0 |
| -0.4910 | 6.6520  | -18.8450 | C | 0 | -0.1120 | 15.4870 | -21.0780 | H | 0 | -0.5170 | 17.0020 | -13.1300 | H | 0 |
| -0.9180 | 6.3010  | -19.7850 | H | 0 | -0.6650 | 16.9970 | -19.6550 | C | 0 | 0.5550  | 17.4060 | -14.7820 | C | 0 |
| 0.5750  | 6.4410  | -18.9320 | H | 0 | -1.5360 | 17.6400 | -19.5330 | H | 0 | 0.8720  | 16.3860 | -15.3450 | O | 0 |
| -0.9950 | 5.8010  | -17.7450 | C | 0 | -0.6100 | 15.9770 | -18.4300 | C | 0 | 0.2210  | 18.4740 | -15.4590 | N | 0 |
| -1.9050 | 6.1020  | -16.7490 | C | 0 | 0.2630  | 15.3240 | -18.4520 | H | 0 | 0.4330  | 18.3890 | -16.4430 | H | 0 |
| -2.3820 | 7.0700  | -16.7100 | H | 0 | -0.5780 | 16.5410 | -17.4980 | H | 0 | 0.2640  | 19.3810 | -15.0160 | H | 0 |
| -2.0430 | 5.0650  | -15.9270 | N | 0 | -1.9350 | 15.1470 | -18.2290 | C | 0 | 0.2320  | 18.3440 | -10.9500 | C | 0 |
| -2.3290 | 5.2890  | -14.9850 | H | 0 | -2.6750 | 15.9070 | -17.9780 | H | 0 | 0.3170  | 17.2010 | -10.5840 | O | 0 |
| -1.3820 | 3.9500  | -16.3180 | C | 0 | -2.2330 | 14.5510 | -19.0920 | H | 0 | -0.0260 | 19.3430 | -10.1070 | N | 0 |
| -1.1180 | 2.7290  | -15.6600 | C | 0 | -1.7170 | 14.3580 | -16.9550 | C | 0 | 0.2840  | 20.2630 | -10.3860 | H | 0 |
| -1.5030 | 2.4650  | -14.6860 | H | 0 | -1.2970 | 14.9500 | -16.1420 | H | 0 | -0.1520 | 19.0780 | -8.6330  | C | 0 |
| -0.4230 | 1.7010  | -16.4070 | C | 0 | -2.6520 | 13.9320 | -16.5930 | H | 0 | 0.4930  | 18.2330 | -8.3940  | H | 0 |
| -0.2920 | 0.7140  | -15.9900 | H | 0 | -0.8960 | 13.1730 | -17.1730 | N | 0 | 0.1730  | 20.3080 | -7.7720  | C | 0 |
| 0.1400  | 2.0630  | -17.6930 | C | 0 | -1.3660 | 12.3680 | -17.5620 | H | 0 | -0.2320 | 21.1780 | -8.2880  | H | 0 |
| 0.6410  | 1.3220  | -18.2980 | H | 0 | 0.3530  | 12.8920 | -16.9130 | C | 0 | -0.1970 | 20.1840 | -6.7540  | H | 0 |
| -0.0270 | 3.3610  | -18.1890 | C | 0 | 1.1420  | 13.7310 | -16.2340 | N | 0 | 1.7410  | 20.3570 | -7.7260  | C | 0 |
| 0.3140  | 3.6020  | -19.1850 | H | 0 | 0.8600  | 14.6340 | -15.8810 | H | 0 | 2.0910  | 19.5040 | -7.1440  | H | 0 |
| -0.7540 | 4.3600  | -17.5420 | C | 0 | 2.0580  | 13.3620 | -16.0220 | H | 0 | 2.2440  | 20.2410 | -8.6860  | H | 0 |
| 0.1460  | 8.8530  | -19.8800 | C | 0 | 0.8400  | 11.7020 | -17.2760 | N | 0 | 2.3500  | 21.6400 | -7.0310  | C | 0 |
| 1.3340  | 9.2110  | -19.6880 | O | 0 | 0.2020  | 11.0330 | -17.6830 | H | 0 | 2.4570  | 22.3580 | -7.8450  | H | 0 |
| -0.6510 | 9.2710  | -20.9120 | N | 0 | 1.7730  | 11.3970 | -17.0390 | H | 0 | 1.5910  | 21.9730 | -6.3230  | H | 0 |
| -1.6200 | 8.9840  | -20.9140 | H | 0 | 0.5290  | 17.9140 | -19.5850 | C | 0 | 3.6340  | 21.3520 | -6.2010  | C | 0 |
| -0.1480 | 10.0090 | -22.0560 | C | 0 | 0.7000  | 18.4950 | -18.4930 | O | 0 | 3.8220  | 22.2070 | -5.5520  | H | 0 |
| 0.8490  | 9.5880  | -22.1870 | H | 0 | 1.2320  | 18.1180 | -20.7310 | N | 0 | 3.5150  | 20.5680 | -5.4530  | H | 0 |
| -0.9330 | 9.7890  | -23.3380 | C | 0 | 0.9200  | 17.6790 | -21.5860 | H | 0 | 4.8010  | 21.1430 | -7.1080  | N | 0 |
| -0.9610 | 8.7190  | -23.5440 | H | 0 | 2.4150  | 19.0470 | -20.8200 | C | 0 | 4.6840  | 20.2480 | -7.5620  | H | 0 |
| -1.8590 | 10.3480 | -23.2010 | H | 0 | 3.1150  | 18.8590 | -20.0050 | H | 0 | 5.0200  | 21.9400 | -7.6890  | H | 0 |
| -0.1550 | 10.4080 | -24.5010 | C | 0 | 3.0600  | 18.8650 | -22.2140 | C | 0 | 5.6400  | 20.8600 | -6.6210  | H | 0 |
| 1.0520  | 10.3450 | -24.5720 | O | 0 | 3.3390  | 17.8230 | -22.3720 | H | 0 | -1.6100 | 18.6950 | -8.2690  | C | 0 |
| -0.8370 | 11.0020 | -25.4510 | N | 0 | 2.3200  | 19.1630 | -22.9560 | H | 0 | -2.5710 | 19.1640 | -8.8600  | O | 0 |
| -0.3400 | 11.5940 | -26.1010 | H | 0 | 4.2600  | 19.7150 | -22.6530 | C | 0 | -1.8700 | 17.9620 | -7.1530  | N | 0 |
| -1.7590 | 11.3160 | -25.1840 | H | 0 | 4.0230  | 20.7790 | -22.6470 | H | 0 | -2.8300 | 17.6510 | -7.1160  | H | 0 |
| 0.1290  | 11.4020 | -21.6670 | C | 0 | 4.9930  | 19.6100 | -21.8540 | H | 0 | -0.9790 | 17.3900 | -6.1580  | C | 0 |
| -0.4890 | 12.3380 | -22.1580 | O | 0 | 4.7350  | 19.3160 | -24.0930 | C | 0 | 0.0510  | 17.6940 | -6.3460  | H | 0 |
| 1.2590  | 11.5980 | -20.9250 | N | 0 | 5.7710  | 19.6490 | -24.1480 | H | 0 | -1.4140 | 18.0330 | -4.8100  | C | 0 |
| 1.6590  | 10.7340 | -20.5870 | H | 0 | 4.6640  | 18.2380 | -24.2310 | H | 0 | -2.4920 | 17.8680 | -4.8290  | H | 0 |
| 1.9280  | 12.8710 | -20.3980 | C | 0 | 3.8050  | 19.8950 | -25.1780 | C | 0 | -1.0960 | 17.4450 | -3.9480  | H | 0 |

|         |         |          |   |   |         |         |         |   |   |          |         |         |   |   |
|---------|---------|----------|---|---|---------|---------|---------|---|---|----------|---------|---------|---|---|
| -1.3340 | 19.4420 | -4.4970  | C | 0 | -1.7000 | 14.3960 | 0.7320  | H | 0 | -6.9230  | 14.7140 | 12.9660 | C | 0 |
| -2.3480 | 20.3430 | -4.5480  | C | 0 | -2.0590 | 15.3770 | 2.1960  | H | 0 | -7.6490  | 15.1410 | 13.6590 | H | 0 |
| -3.3400 | 20.1350 | -4.9200  | H | 0 | -1.8230 | 16.4540 | 0.3330  | C | 0 | -6.3790  | 13.9630 | 13.5380 | H | 0 |
| -1.8160 | 21.6210 | -4.2820  | N | 0 | -1.4700 | 17.7820 | 0.6730  | C | 0 | -7.5830  | 14.0070 | 11.7790 | C | 0 |
| -2.3440 | 22.4680 | -4.4330  | H | 0 | -0.8640 | 18.0270 | 1.5330  | H | 0 | -8.4460  | 13.3890 | 12.0290 | H | 0 |
| -0.4890 | 21.5910 | -3.9340  | C | 0 | -1.8150 | 18.8180 | -0.2340 | C | 0 | -6.9270  | 13.3410 | 11.2180 | H | 0 |
| 0.3510  | 22.5550 | -3.3980  | C | 0 | -1.3340 | 19.7690 | -0.0580 | H | 0 | -7.9760  | 15.2290 | 10.8920 | C | 0 |
| 0.0820  | 23.5960 | -3.4900  | H | 0 | -2.5360 | 18.5360 | -1.3850 | C | 0 | -7.9330  | 14.9370 | 9.8430  | H | 0 |
| 1.6310  | 22.0930 | -2.9380  | C | 0 | -2.8610 | 19.2910 | -2.0860 | H | 0 | -9.4100  | 15.7130 | 11.2460 | C | 0 |
| 2.3590  | 22.7870 | -2.5430  | H | 0 | -2.9240 | 17.2040 | -1.6520 | C | 0 | -10.3420 | 15.0060 | 10.9620 | O | 0 |
| 1.9410  | 20.7340 | -3.0320  | C | 0 | -3.7470 | 17.1350 | -2.3480 | H | 0 | -9.5690  | 16.8270 | 11.9410 | N | 0 |
| 2.9390  | 20.4390 | -2.7440  | H | 0 | -2.5520 | 16.1610 | -0.8340 | C | 0 | -8.7470  | 17.3720 | 12.1590 | H | 0 |
| 1.1080  | 19.7810 | -3.6420  | C | 0 | -2.9700 | 15.1960 | -1.0780 | H | 0 | -10.9380 | 17.3230 | 12.4000 | C | 0 |
| 1.4190  | 18.7550 | -3.7710  | H | 0 | 0.0290  | 14.8220 | 3.2480  | C | 0 | -11.6320 | 16.4890 | 12.5100 | H | 0 |
| -0.2240 | 20.1410 | -3.9960  | C | 0 | -0.4630 | 13.7510 | 3.4910  | O | 0 | -10.7600 | 17.8130 | 13.8460 | C | 0 |
| -0.9380 | 15.9180 | -6.2310  | C | 0 | 0.3760  | 15.7120 | 4.1260  | N | 0 | -10.2180 | 18.7540 | 13.7540 | H | 0 |
| -1.0310 | 15.2040 | -5.2720  | O | 0 | 0.7880  | 16.5800 | 3.8130  | H | 0 | -11.7530 | 18.0730 | 14.2150 | H | 0 |
| -0.9030 | 15.3980 | -7.4190  | N | 0 | 0.1280  | 15.6340 | 5.5690  | C | 0 | -10.0040 | 16.8430 | 14.7550 | C | 0 |
| -0.9390 | 15.9360 | -8.2730  | H | 0 | -0.0230 | 14.5920 | 5.8490  | H | 0 | -9.0430  | 17.3820 | 15.3560 | O | 0 |
| -0.7970 | 13.9710 | -7.7180  | C | 0 | 1.3620  | 16.1980 | 6.3320  | C | 0 | -10.3060 | 15.6210 | 14.8230 | O | 0 |
| -1.2110 | 13.4990 | -6.8270  | H | 0 | 1.4240  | 17.2850 | 6.2750  | H | 0 | -11.5850 | 18.3480 | 11.3970 | C | 0 |
| -1.6570 | 13.7020 | -9.0330  | C | 0 | 1.1950  | 16.0740 | 7.4020  | H | 0 | -12.8010 | 18.5660 | 11.3010 | O | 0 |
| -0.9580 | 13.6330 | -9.8670  | H | 0 | 2.2450  | 15.6950 | 5.9380  | H | 0 | -10.7900 | 18.8560 | 10.4480 | N | 0 |
| -2.1490 | 12.7300 | -9.0590  | H | 0 | -1.1150 | 16.5000 | 5.9850  | C | 0 | -9.7930  | 18.7600 | 10.5730 | H | 0 |
| -2.6770 | 14.5650 | -9.4390  | O | 0 | -1.2870 | 17.6400 | 5.6120  | O | 0 | -11.2640 | 19.5970 | 9.2940  | C | 0 |
| -3.1400 | 14.2550 | -10.2200 | H | 0 | -2.0330 | 15.9510 | 6.8330  | N | 0 | -12.3480 | 19.6840 | 9.3580  | H | 0 |
| 0.6900  | 13.5720 | -7.7120  | C | 0 | -1.9870 | 14.9730 | 7.0810  | H | 0 | -10.8280 | 21.0290 | 9.4000  | C | 0 |
| 1.5850  | 14.4370 | -7.8630  | O | 0 | -3.3720 | 16.6200 | 6.9790  | C | 0 | -11.0700 | 21.7050 | 8.5800  | H | 0 |
| 1.0000  | 12.2700 | -7.4800  | N | 0 | -3.3120 | 17.7020 | 6.8610  | H | 0 | -11.4110 | 21.7230 | 10.6160 | C | 0 |
| 0.1950  | 11.6700 | -7.3700  | H | 0 | -4.3840 | 15.9620 | 5.9590  | C | 0 | -10.8110 | 22.6170 | 10.7850 | H | 0 |
| 2.2790  | 11.6570 | -7.2060  | C | 0 | -4.1810 | 14.9030 | 5.7980  | H | 0 | -12.4860 | 21.8340 | 10.4750 | H | 0 |
| 2.1810  | 10.6290 | -6.8560  | H | 0 | -5.3580 | 15.9910 | 6.4460  | H | 0 | -11.1760 | 21.0960 | 11.4760 | H | 0 |
| 3.0250  | 11.7120 | -8.5400  | C | 0 | -4.4310 | 16.7370 | 4.6370  | C | 0 | -9.4580  | 21.0040 | 9.4930  | O | 0 |
| 3.2880  | 12.7390 | -8.7950  | H | 0 | -4.9370 | 17.6810 | 4.8360  | H | 0 | -9.2460  | 20.9460 | 10.4270 | H | 0 |
| 3.9580  | 11.1500 | -8.4950  | H | 0 | -3.4230 | 16.9320 | 4.2710  | H | 0 | -10.7290 | 19.1150 | 7.9530  | C | 0 |
| 2.2620  | 11.0410 | -10.0100 | S | 0 | -5.1420 | 15.9640 | 3.5160  | C | 0 | -11.3130 | 19.5080 | 6.9480  | O | 0 |
| 2.6950  | 9.7770  | -9.9770  | H | 0 | -4.8650 | 14.9170 | 3.3910  | H | 0 | -9.5820  | 18.3930 | 7.9160  | N | 0 |
| 2.9650  | 12.3430 | -5.9980  | C | 0 | -6.2170 | 16.1150 | 3.6080  | H | 0 | -9.3270  | 17.9560 | 8.7910  | H | 0 |
| 4.1120  | 12.7630 | -6.1490  | O | 0 | -4.9620 | 16.5780 | 2.1780  | N | 0 | -8.9860  | 17.7110 | 6.7540  | C | 0 |
| 2.2130  | 12.5570 | -4.8910  | N | 0 | -4.2890 | 16.2020 | 1.5250  | H | 0 | -8.4160  | 16.8470 | 7.0960  | H | 0 |
| 1.2810  | 12.1770 | -4.9770  | H | 0 | -5.4380 | 17.7490 | 1.7900  | C | 0 | -9.8050  | 17.4610 | 6.0790  | H | 0 |
| 2.5650  | 13.3800 | -3.7720  | C | 0 | -6.3010 | 18.4400 | 2.4670  | N | 0 | -8.0500  | 18.6230 | 5.9980  | C | 0 |
| 3.6480  | 13.4980 | -3.8190  | H | 0 | -6.6340 | 18.0200 | 3.3220  | H | 0 | -7.6710  | 18.3360 | 4.8330  | O | 0 |
| 1.7980  | 14.7240 | -3.9760  | C | 0 | -6.3780 | 19.4220 | 2.2430  | H | 0 | -7.5730  | 19.6520 | 6.6740  | N | 0 |
| 0.7090  | 14.6810 | -3.9950  | H | 0 | -5.0930 | 18.2340 | 0.5850  | N | 0 | -7.9140  | 19.8350 | 7.6060  | H | 0 |
| 1.9830  | 15.7570 | -2.9340  | C | 0 | -4.5330 | 17.7880 | -0.1270 | H | 0 | -6.7470  | 20.7240 | 5.9870  | C | 0 |
| 3.0390  | 15.8980 | -2.7030  | H | 0 | -5.6500 | 19.0410 | 0.3420  | H | 0 | -6.9970  | 20.7910 | 4.9280  | H | 0 |
| 1.5890  | 16.7360 | -3.2070  | H | 0 | -3.8480 | 16.4880 | 8.4010  | C | 0 | -7.1000  | 22.0580 | 6.6480  | C | 0 |
| 1.5720  | 15.3680 | -2.0030  | H | 0 | -3.9360 | 15.3770 | 8.9520  | O | 0 | -7.0240  | 21.9110 | 7.7250  | H | 0 |
| 2.2040  | 15.3880 | -5.1450  | O | 0 | -4.3060 | 17.6120 | 8.9590  | N | 0 | -6.2600  | 22.6100 | 6.2260  | H | 0 |
| 2.1010  | 14.8780 | -5.9520  | H | 0 | -4.1730 | 18.4920 | 8.4820  | H | 0 | -8.4540  | 22.7070 | 6.1970  | C | 0 |
| 2.1580  | 12.7600 | -2.4220  | C | 0 | -5.0460 | 17.7240 | 10.2800 | C | 0 | -8.4210  | 22.9040 | 5.1260  | H | 0 |
| 1.0710  | 12.2180 | -2.2310  | O | 0 | -4.4460 | 17.1420 | 10.9810 | H | 0 | -9.2510  | 21.9920 | 6.4020  | H | 0 |
| 2.9470  | 13.0570 | -1.4040  | N | 0 | -5.0970 | 19.1640 | 10.7590 | C | 0 | -8.6110  | 24.0870 | 6.8270  | C | 0 |
| 3.7960  | 13.5750 | -1.5820  | H | 0 | -5.3250 | 19.8190 | 9.9190  | H | 0 | -7.7820  | 24.7170 | 6.5010  | H | 0 |
| 2.5970  | 12.9000 | 0.0500   | C | 0 | -5.8690 | 19.2490 | 11.5240 | H | 0 | -9.5490  | 24.4860 | 6.4410  | H | 0 |
| 1.9580  | 12.0200 | 0.1200   | H | 0 | -3.7050 | 19.6650 | 11.3880 | C | 0 | -8.5370  | 24.1140 | 8.4040  | C | 0 |
| 3.8920  | 12.6190 | 0.8670   | C | 0 | -3.4710 | 19.0050 | 12.2230 | H | 0 | -9.4440  | 23.6040 | 8.7280  | H | 0 |
| 4.5440  | 13.4820 | 1.0010   | H | 0 | -2.8770 | 19.7720 | 10.6860 | H | 0 | -7.6220  | 23.6950 | 8.8220  | H | 0 |
| 3.3430  | 12.1450 | 2.2200   | C | 0 | -3.7660 | 21.0180 | 12.0310 | C | 0 | -8.6240  | 25.5690 | 8.9350  | N | 0 |
| 2.4510  | 11.5210 | 2.2580   | H | 0 | -4.1120 | 21.7490 | 11.3000 | H | 0 | -9.5830  | 25.7140 | 9.2160  | H | 0 |
| 4.0370  | 11.4190 | 2.6430   | H | 0 | -4.4770 | 20.9630 | 12.8550 | H | 0 | -7.9210  | 25.7200 | 9.6440  | H | 0 |
| 3.2420  | 13.0260 | 2.8540   | H | 0 | -2.4300 | 21.3990 | 12.5380 | N | 0 | -8.3430  | 26.2010 | 8.1990  | H | 0 |
| 4.7200  | 11.4840 | 0.2030   | C | 0 | -1.9430 | 20.7660 | 13.1560 | H | 0 | -5.2350  | 20.3940 | 6.0600  | C | 0 |
| 3.9790  | 10.6860 | 0.2510   | H | 0 | -1.8690 | 22.5320 | 12.3100 | C | 0 | -4.7440  | 19.8360 | 7.0830  | O | 0 |
| 4.8390  | 11.7740 | -0.8410  | H | 0 | -2.5980 | 23.4930 | 11.8080 | N | 0 | -4.5060  | 20.5730 | 5.0000  | N | 0 |
| 6.0430  | 10.9990 | 0.7410   | C | 0 | -3.5630 | 23.3410 | 11.5500 | H | 0 | -5.0090  | 20.9070 | 4.1900  | H | 0 |
| 5.9450  | 10.4910 | 1.7000   | H | 0 | -2.1670 | 24.3970 | 11.6730 | H | 0 | -3.1050  | 20.1810 | 4.8420  | C | 0 |
| 6.5070  | 10.3050 | 0.0400   | H | 0 | -0.6350 | 22.8700 | 12.5390 | N | 0 | -2.8800  | 19.2090 | 5.2820  | H | 0 |
| 6.7810  | 11.7890 | 0.8810   | H | 0 | 0.1010  | 22.2560 | 12.8610 | H | 0 | -2.6420  | 20.2740 | 3.4350  | C | 0 |
| 1.9240  | 14.1570 | 0.4930   | C | 0 | -0.3880 | 23.8310 | 12.3510 | H | 0 | -3.3230  | 19.6800 | 2.8250  | H | 0 |
| 2.4800  | 15.2510 | 0.4350   | O | 0 | -6.4870 | 17.0800 | 10.1980 | C | 0 | -2.6380  | 21.2990 | 3.0650  | H | 0 |
| 0.7210  | 14.0820 | 1.0110   | N | 0 | -7.2980 | 17.3380 | 9.3240  | O | 0 | -1.6960  | 19.7410 | 3.3460  | H | 0 |
| 0.4550  | 13.1480 | 1.2880   | H | 0 | -6.8690 | 16.2100 | 11.1820 | N | 0 | -2.1920  | 21.0930 | 5.6900  | C | 0 |
| 0.0350  | 15.1970 | 1.7370   | C | 0 | -6.0020 | 15.8060 | 12.2600 | C | 0 | -2.2760  | 22.3390 | 5.7050  | O | 0 |
| 0.6230  | 16.1150 | 1.7460   | H | 0 | -5.7150 | 16.6130 | 12.9350 | H | 0 | -1.0850  | 20.5140 | 6.1890  | N | 0 |
| -1.4760 | 15.3130 | 1.2770   | C | 0 | -5.0860 | 15.2870 | 11.9800 | H | 0 | -1.0080  | 19.5070 | 6.1620  | H | 0 |

|         |         |         |   |   |        |         |          |   |   |         |         |          |   |   |
|---------|---------|---------|---|---|--------|---------|----------|---|---|---------|---------|----------|---|---|
| 0.0280  | 21.2010 | 6.8340  | C | 0 | 5.5650 | 16.5850 | -3.2270  | N | 0 | 7.2540  | 16.4200 | -20.4950 | C | 0 |
| -0.2800 | 22.2470 | 6.8190  | H | 0 | 5.8970 | 17.5350 | -3.1370  | H | 0 | 7.8470  | 16.2920 | -21.3880 | H | 0 |
| 0.3590  | 20.6510 | 8.1900  | C | 0 | 5.4470 | 15.9260 | -4.5720  | C | 0 | 7.9600  | 16.6960 | -19.2850 | C | 0 |
| -0.4560 | 20.8920 | 8.8720  | H | 0 | 4.5980 | 15.2480 | -4.4910  | H | 0 | 9.0400  | 16.7180 | -19.2810 | H | 0 |
| 0.4790  | 19.6200 | 7.8570  | H | 0 | 5.0650 | 17.0010 | -5.6580  | C | 0 | 7.2460  | 16.9130 | -18.1300 | C | 0 |
| 1.5880  | 21.0220 | 9.0250  | C | 0 | 4.1000 | 17.4660 | -5.4570  | H | 0 | 7.8650  | 17.2030 | -17.2940 | H | 0 |
| 1.4470  | 20.3680 | 9.8860  | H | 0 | 5.7810 | 17.8220 | -5.6230  | H | 0 | 5.8670  | 16.6820 | -18.0110 | C | 0 |
| 2.5150  | 20.8100 | 8.4930  | H | 0 | 4.9900 | 16.4430 | -7.0510  | C | 0 | 4.8500  | 14.2010 | -14.8710 | C | 0 |
| 1.5840  | 22.4580 | 9.5490  | C | 0 | 5.9890 | 16.3590 | -7.4790  | H | 0 | 5.4850  | 14.0230 | -15.8810 | O | 0 |
| 1.2370  | 23.1520 | 8.7840  | H | 0 | 4.5310 | 15.4550 | -7.0860  | H | 0 | 4.4370  | 13.2630 | -13.9890 | N | 0 |
| 0.8640  | 22.5190 | 10.3640 | H | 0 | 4.1150 | 17.3570 | -7.9830  | C | 0 | 4.0780  | 13.5200 | -13.0800 | H | 0 |
| 2.8620  | 22.8300 | 10.1410 | N | 0 | 4.5310 | 18.4880 | -8.0940  | O | 0 | 4.5740  | 11.7740 | -14.1560 | C | 0 |
| 2.8950  | 23.0400 | 11.1280 | H | 0 | 3.1380 | 16.9040 | -8.7020  | N | 0 | 5.6170  | 11.5120 | -13.9770 | H | 0 |
| 3.9330  | 23.1460 | 9.4850  | C | 0 | 2.8560 | 17.5110 | -9.4580  | H | 0 | 3.7980  | 11.0330 | -13.0510 | C | 0 |
| 3.9790  | 23.1480 | 8.1490  | N | 0 | 2.7570 | 15.9910 | -8.4990  | H | 0 | 4.3900  | 11.2360 | -12.1590 | H | 0 |
| 3.1160  | 22.9060 | 7.6820  | H | 0 | 6.7050 | 15.0960 | -4.9010  | C | 0 | 2.8020  | 11.4770 | -13.0590 | H | 0 |
| 4.7480  | 23.6250 | 7.7010  | H | 0 | 7.8130 | 15.6220 | -5.1380  | O | 0 | 3.7070  | 9.5080  | -13.3610 | C | 0 |
| 4.9220  | 23.4990 | 10.1820 | N | 0 | 6.5900 | 13.7810 | -4.9310  | N | 0 | 2.6560  | 8.9000  | -13.5910 | O | 0 |
| 4.8920  | 23.4890 | 11.1910 | H | 0 | 5.6460 | 13.4220 | -4.9210  | H | 0 | 4.8390  | 9.0210  | -13.5800 | O | 0 |
| 5.8040  | 23.7710 | 9.7720  | H | 0 | 7.6170 | 12.9020 | -5.3390  | C | 0 | 4.1680  | 11.3270 | -15.1510 | C | 0 |
| 1.2520  | 21.3130 | 6.0120  | C | 0 | 8.5370 | 13.1400 | -4.8050  | H | 0 | 3.3070  | 11.8770 | -16.2250 | O | 0 |
| 1.9170  | 22.3590 | 6.1130  | O | 0 | 7.2930 | 11.4770 | -5.0800  | C | 0 | 4.8740  | 10.3670 | -15.9790 | N | 0 |
| 1.6540  | 20.2890 | 5.3250  | N | 0 | 6.4080 | 11.1180 | -5.6050  | H | 0 | 5.2480  | 9.7530  | -15.2690 | H | 0 |
| 1.1090  | 19.4410 | 5.3780  | H | 0 | 8.0330 | 10.7980 | -5.5030  | H | 0 | 4.7370  | 9.6950  | -17.2710 | C | 0 |
| 2.7700  | 20.1430 | 4.4090  | C | 0 | 7.1210 | 11.1280 | -3.5740  | C | 0 | 3.7290  | 9.8130  | -17.6690 | H | 0 |
| 3.0100  | 21.1260 | 4.0050  | H | 0 | 7.9990 | 11.6150 | -3.1480  | H | 0 | 5.7370  | 10.3360 | -18.2490 | C | 0 |
| 4.0790  | 19.7780 | 5.1540  | C | 0 | 6.2100 | 11.6010 | -3.2070  | H | 0 | 5.4020  | 10.3280 | -19.2870 | H | 0 |
| 4.8340  | 19.9670 | 4.3910  | H | 0 | 6.9230 | 9.4480  | -3.0600  | S | 0 | 5.8500  | 11.3980 | -18.0320 | H | 0 |
| 4.3030  | 20.5270 | 5.9140  | H | 0 | 5.1650 | 9.1160  | -3.3750  | C | 0 | 7.1240  | 9.9290  | -18.0910 | O | 0 |
| 4.2360  | 18.4020 | 5.7410  | C | 0 | 4.5730 | 9.8460  | -2.8220  | H | 0 | 7.3430  | 10.0870 | -17.1690 | H | 0 |
| 4.2650  | 18.1790 | 7.0530  | C | 0 | 4.9100 | 9.1990  | -4.4310  | H | 0 | 4.9530  | 8.1550  | -17.2410 | C | 0 |
| 4.2180  | 19.0290 | 7.7190  | H | 0 | 5.0050 | 8.0570  | -3.1730  | H | 0 | 5.3750  | 7.5470  | -18.2940 | O | 0 |
| 4.4920  | 16.7780 | 7.2910  | N | 0 | 7.9100 | 13.1120 | -6.8320  | C | 0 | 4.6180  | 7.5720  | -16.1540 | N | 0 |
| 4.6020  | 16.3650 | 8.2060  | H | 0 | 9.0530 | 13.0310 | -7.2370  | O | 0 | 4.2510  | 8.0540  | -15.3460 | H | 0 |
| 4.8260  | 16.1500 | 6.0800  | C | 0 | 6.9610 | 13.1510 | -7.7540  | N | 0 | 5.0320  | 6.1710  | -15.9080 | C | 0 |
| 5.1420  | 14.8120 | 5.7760  | C | 0 | 5.9890 | 13.3030 | -7.5250  | H | 0 | 5.1100  | 5.6070  | -16.8370 | H | 0 |
| 5.5470  | 14.1390 | 6.5170  | H | 0 | 7.2690 | 12.9040 | -9.1650  | C | 0 | 6.3820  | 6.0550  | -15.2670 | C | 0 |
| 5.2530  | 14.3950 | 4.4290  | C | 0 | 8.2980 | 13.1550 | -9.4260  | H | 0 | 6.2760  | 6.5850  | -14.3200 | H | 0 |
| 5.4520  | 13.3600 | 4.1920  | H | 0 | 7.1400 | 11.4480 | -9.6490  | C | 0 | 6.4930  | 5.0140  | -14.9600 | H | 0 |
| 5.1300  | 15.3030 | 3.3930  | C | 0 | 6.0760 | 11.2200 | -9.7070  | H | 0 | 7.5140  | 6.6050  | -16.0240 | C | 0 |
| 5.2170  | 15.0700 | 2.3420  | H | 0 | 7.8110 | 11.1350 | -11.0080 | C | 0 | 8.3240  | 5.9710  | -16.9120 | C | 0 |
| 4.9500  | 16.6690 | 3.7260  | C | 0 | 8.8800 | 11.3440 | -10.9660 | H | 0 | 8.2190  | 4.9120  | -17.0960 | H | 0 |
| 4.8890  | 17.3500 | 2.8900  | H | 0 | 7.6420 | 10.1340 | -11.4070 | H | 0 | 9.3440  | 6.7640  | -17.3610 | N | 0 |
| 4.6450  | 17.1460 | 5.0770  | C | 0 | 7.2360 | 11.7300 | -11.7190 | H | 0 | 10.1360 | 6.4510  | -17.9040 | H | 0 |
| 2.5260  | 19.1630 | 3.2460  | C | 0 | 7.6230 | 10.5520 | -8.6790  | O | 0 | 9.3370  | 7.9390  | -16.5810 | C | 0 |
| 1.8130  | 18.1530 | 3.4010  | O | 0 | 8.5120 | 10.8390 | -8.4610  | H | 0 | 10.1780 | 9.0960  | -16.6610 | C | 0 |
| 3.1500  | 19.3500 | 2.1240  | N | 0 | 6.4100 | 13.8640 | -10.0680 | C | 0 | 11.0390 | 9.1420  | -17.3110 | H | 0 |
| 3.6770  | 20.1950 | 1.9530  | H | 0 | 5.3200 | 13.5060 | -10.5640 | O | 0 | 9.9640  | 10.1510 | -15.8000 | C | 0 |
| 3.0060  | 18.4690 | 0.9650  | C | 0 | 6.8370 | 15.1040 | -10.1790 | N | 0 | 10.6490 | 10.9850 | -15.8200 | H | 0 |
| 2.5340  | 17.5590 | 1.3340  | H | 0 | 8.0640 | 15.6760 | -9.6900  | C | 0 | 8.8540  | 10.1280 | -14.8770 | C | 0 |
| 2.0200  | 19.0190 | -0.0720 | C | 0 | 8.9310 | 15.0500 | -9.9030  | H | 0 | 8.6500  | 10.9690 | -14.2320 | H | 0 |
| 2.4340  | 19.8480 | -0.6450 | H | 0 | 8.0060 | 15.9420 | -8.6350  | H | 0 | 7.9720  | 9.0120  | -14.9220 | C | 0 |
| 1.7910  | 18.2810 | -0.8410 | H | 0 | 8.1470 | 16.8490 | -10.6530 | C | 0 | 7.1430  | 8.9910  | -14.2300 | H | 0 |
| 1.0910  | 19.1820 | 0.4750  | H | 0 | 8.3730 | 16.4390 | -11.6370 | H | 0 | 8.1820  | 7.8800  | -15.7950 | C | 0 |
| 4.2890  | 18.3400 | 0.1950  | C | 0 | 8.8670 | 17.6350 | -10.4210 | H | 0 | 4.0430  | 5.3460  | -15.0750 | C | 0 |
| 5.0720  | 19.2530 | -0.0500 | O | 0 | 6.7320 | 17.3520 | -10.7050 | C | 0 | 4.1610  | 4.1670  | -15.1660 | O | 0 |
| 4.6100  | 17.0710 | -0.2090 | N | 0 | 6.5320 | 18.0960 | -11.4760 | H | 0 | 3.0370  | 6.0550  | -14.3840 | N | 0 |
| 4.0780  | 16.2480 | 0.0360  | H | 0 | 6.4310 | 17.8280 | -9.7720  | H | 0 | 3.1620  | 7.0540  | -14.2990 | H | 0 |
| 5.7800  | 16.7530 | -0.9340 | C | 0 | 6.0160 | 16.0850 | -10.9530 | C | 0 | 2.1580  | 5.3310  | -13.3950 | C | 0 |
| 6.3000  | 17.6780 | -1.1860 | H | 0 | 5.0350 | 16.2270 | -10.5010 | H | 0 | 1.5900  | 6.1720  | -12.9960 | H | 0 |
| 6.7550  | 16.0240 | 0.0060  | C | 0 | 5.8420 | 15.8270 | -12.4820 | C | 0 | 1.1310  | 4.4530  | -13.9620 | C | 0 |
| 6.9370  | 16.7200 | 0.8240  | H | 0 | 6.8090 | 15.4200 | -13.0970 | O | 0 | 0.8240  | 4.6880  | -14.9220 | H | 0 |
| 6.3200  | 15.0760 | 0.3220  | H | 0 | 4.6640 | 16.0020 | -13.0490 | N | 0 | 1.5340  | 3.4690  | -14.2000 | H | 0 |
| 8.0890  | 15.7120 | -0.5880 | C | 0 | 3.8390 | 15.9430 | -12.4690 | H | 0 | -0.1070 | 4.2330  | -13.0580 | C | 0 |
| 9.1100  | 16.6550 | -0.7560 | C | 0 | 4.5600 | 15.6800 | -14.5200 | C | 0 | -0.7710 | 5.2400  | -12.7670 | O | 0 |
| 9.0990  | 17.5950 | -0.2250 | H | 0 | 3.5060 | 15.8080 | -14.7690 | H | 0 | -0.5260 | 3.2260  | -12.5440 | O | 0 |
| 10.2760 | 16.3590 | -1.5370 | C | 0 | 5.1830 | 16.7270 | -15.4230 | C | 0 | 2.8990  | 4.8910  | -12.1460 | C | 0 |
| 11.0910 | 17.0680 | -1.5430 | H | 0 | 4.7470 | 17.6570 | -15.0590 | H | 0 | 2.5000  | 3.9690  | -11.4780 | O | 0 |
| 10.3440 | 15.0900 | -2.1430 | C | 0 | 6.2660 | 16.6520 | -15.3310 | H | 0 | 3.8710  | 5.7250  | -11.6620 | N | 0 |
| 11.4540 | 14.7300 | -2.7860 | O | 0 | 4.9410 | 16.6360 | -16.9000 | C | 0 | 4.1940  | 6.4740  | -12.2570 | H | 0 |
| 11.7890 | 15.3430 | -3.4440 | H | 0 | 3.7300 | 16.3820 | -17.4590 | C | 0 | 4.4070  | 5.6830  | -10.2680 | C | 0 |
| 9.3580  | 14.1280 | -2.0300 | C | 0 | 2.8290 | 16.2170 | -16.8860 | H | 0 | 4.4760  | 4.6450  | -9.9420  | H | 0 |
| 9.4100  | 13.1930 | -2.5690 | H | 0 | 3.8710 | 16.3300 | -18.8540 | N | 0 | 5.8250  | 6.4070  | -10.1510 | C | 0 |
| 8.2490  | 14.4280 | -1.2130 | C | 0 | 3.0620 | 16.2480 | -19.4540 | H | 0 | 5.7140  | 7.4210  | -10.5360 | H | 0 |
| 7.4360  | 13.7200 | -1.1390 | H | 0 | 5.1840 | 16.4700 | -19.1970 | C | 0 | 6.1300  | 6.4130  | -9.1050  | H | 0 |
| 5.4880  | 15.9280 | -2.1080 | C | 0 | 5.8040 | 16.4450 | -20.4380 | C | 0 | 6.9320  | 5.7410  | -11.0440 | C | 0 |
| 5.1400  | 14.7360 | -2.1420 | O | 0 | 5.2550 | 16.1300 | -21.3140 | H | 0 | 7.0770  | 4.3300  | -11.1720 | C | 0 |

|         |        |          |   |   |         |        |         |   |   |         |         |         |   |   |
|---------|--------|----------|---|---|---------|--------|---------|---|---|---------|---------|---------|---|---|
| 6.4210  | 3.6580 | -10.6380 | H | 0 | 3.6700  | 5.2650 | 3.2420  | H | 0 | 8.4300  | 9.1740  | 16.0040 | O | 0 |
| 8.0480  | 3.7710 | -12.0370 | C | 0 | 3.7830  | 6.1830 | 5.1900  | C | 0 | 12.4870 | 7.8930  | 15.1540 | C | 0 |
| 8.0940  | 2.6980 | -12.1490 | H | 0 | 4.6240  | 6.7350 | 4.7720  | H | 0 | 12.8330 | 6.8690  | 15.6660 | O | 0 |
| 8.9360  | 4.6300 | -12.7140 | C | 0 | 2.5530  | 7.1040 | 5.1740  | C | 0 | 13.3220 | 8.6710  | 14.4590 | N | 0 |
| 9.8750  | 4.1110 | -13.5230 | O | 0 | 1.7960  | 6.4170 | 5.5530  | H | 0 | 12.9880 | 9.5190  | 14.0230 | H | 0 |
| 9.7000  | 3.1700 | -13.6020 | H | 0 | 2.7920  | 7.9070 | 5.8720  | H | 0 | 14.6940 | 8.2910  | 13.9450 | C | 0 |
| 8.8250  | 6.0370 | -12.6400 | C | 0 | 2.2350  | 7.7250 | 3.8630  | C | 0 | 15.0750 | 7.4360  | 14.5050 | H | 0 |
| 9.7010  | 6.6010 | -12.9220 | H | 0 | 1.7230  | 6.9510 | 3.2920  | H | 0 | 14.6890 | 7.9050  | 12.4840 | C | 0 |
| 7.7930  | 6.5800 | -11.8150 | C | 0 | 1.4520  | 8.4780 | 3.9520  | H | 0 | 14.5670 | 8.8510  | 11.9570 | H | 0 |
| 7.7940  | 7.6340 | -11.5790 | H | 0 | 3.5150  | 8.5860 | 2.8450  | S | 0 | 15.7080 | 7.6680  | 12.1790 | H | 0 |
| 3.3340  | 6.4210 | -9.3380  | C | 0 | 2.6090  | 8.5940 | 1.3150  | C | 0 | 13.7040 | 6.9030  | 11.8610 | C | 0 |
| 3.4930  | 7.5360 | -8.8570  | O | 0 | 3.3760  | 8.2780 | 0.6090  | H | 0 | 12.6830 | 7.0850  | 12.1950 | H | 0 |
| 2.2600  | 5.6540 | -9.0320  | N | 0 | 1.8190  | 7.8450 | 1.2710  | H | 0 | 13.8760 | 7.0660  | 10.3620 | C | 0 |
| 2.0470  | 4.7720 | -9.4760  | H | 0 | 2.0880  | 9.4840 | 0.9630  | H | 0 | 13.6290 | 8.1040  | 10.1420 | H | 0 |
| 1.3220  | 6.0460 | -7.9750  | C | 0 | 4.0850  | 5.7670 | 6.7390  | C | 0 | 14.8090 | 6.7520  | 9.8940  | H | 0 |
| 0.9210  | 7.0450 | -8.1430  | H | 0 | 3.3540  | 6.1350 | 7.6310  | O | 0 | 13.0650 | 6.4920  | 9.9120  | H | 0 |
| 0.1740  | 5.1050 | -7.9510  | C | 0 | 5.1040  | 4.9200 | 6.9840  | N | 0 | 13.9280 | 5.4600  | 12.2620 | C | 0 |
| 0.5490  | 4.1330 | -7.6340  | H | 0 | 5.6510  | 4.7040 | 6.1630  | H | 0 | 14.0320 | 5.3490  | 13.3410 | H | 0 |
| -0.5340 | 5.3570 | -7.1610  | H | 0 | 5.4470  | 4.3700 | 8.2790  | C | 0 | 13.0130 | 4.9380  | 11.9840 | H | 0 |
| -0.6600 | 4.8740 | -9.1030  | C | 0 | 4.6410  | 3.7950 | 8.7350  | H | 0 | 14.7560 | 4.9920  | 11.7280 | H | 0 |
| -1.2540 | 3.8070 | -9.3290  | O | 0 | 6.7070  | 3.5030 | 8.0930  | C | 0 | 15.6710 | 9.3990  | 14.1650 | C | 0 |
| -0.8050 | 5.6480 | -9.9960  | O | 0 | 7.5480  | 4.1810 | 7.9480  | H | 0 | 15.3090 | 10.6210 | 14.2730 | O | 0 |
| 1.9900  | 6.0120 | -6.5800  | C | 0 | 6.8210  | 2.6600 | 9.4240  | C | 0 | 16.9670 | 9.0450  | 14.0450 | N | 0 |
| 2.4340  | 4.9880 | -6.0920  | O | 0 | 6.9120  | 3.3920 | 10.2270 | H | 0 | 17.2050 | 8.1200  | 13.7170 | H | 0 |
| 2.0070  | 7.2120 | -5.9150  | N | 0 | 5.9330  | 2.0580 | 9.6170  | H | 0 | 18.1400 | 9.8980  | 14.4820 | C | 0 |
| 1.5710  | 7.9420 | -6.4620  | H | 0 | 7.6350  | 1.9360 | 9.3990  | H | 0 | 17.7250 | 10.4460 | 15.3270 | H | 0 |
| 2.7830  | 7.6320 | -4.7620  | C | 0 | 6.7780  | 2.4810 | 6.9160  | C | 0 | 19.3280 | 8.9840  | 14.9530 | C | 0 |
| 3.7620  | 7.1630 | -4.8630  | H | 0 | 6.0350  | 1.6960 | 7.0540  | H | 0 | 20.1880 | 9.6180  | 15.1680 | H | 0 |
| 2.8700  | 8.7180 | -4.7970  | H | 0 | 6.3910  | 2.8980 | 5.9870  | H | 0 | 18.9230 | 8.2010  | 16.1840 | C | 0 |
| 2.1540  | 7.3030 | -3.4530  | C | 0 | 8.1900  | 1.9480 | 6.5170  | C | 0 | 18.0650 | 7.5820  | 15.9230 | H | 0 |
| 2.3180  | 8.0210 | -2.4550  | O | 0 | 8.5400  | 1.3790 | 7.3780  | H | 0 | 19.7960 | 7.7160  | 16.6230 | H | 0 |
| 1.3610  | 6.2220 | -3.4630  | N | 0 | 8.1990  | 1.3330 | 5.6180  | H | 0 | 18.6990 | 8.9520  | 16.9410 | H | 0 |
| 1.3400  | 5.7950 | -4.3780  | H | 0 | 8.7980  | 2.8440 | 6.3890  | H | 0 | 19.6840 | 8.1030  | 13.9820 | O | 0 |
| 0.3870  | 5.7330 | -2.3950  | C | 0 | 5.8440  | 5.6570 | 9.1880  | C | 0 | 19.1840 | 7.2850  | 14.0360 | H | 0 |
| 0.1460  | 6.5930 | -1.7700  | H | 0 | 6.5250  | 6.5740 | 8.6680  | O | 0 | 18.6380 | 11.0540 | 13.5900 | C | 0 |
| -0.9280 | 5.2260 | -3.1530  | C | 0 | 5.4380  | 5.6780 | 10.4270 | N | 0 | 19.8270 | 11.2140 | 13.4560 | O | 0 |
| -1.6420 | 4.9930 | -2.3630  | H | 0 | 4.6310  | 5.1330 | 10.6950 | H | 0 | 17.6850 | 11.8000 | 12.9480 | N | 0 |
| -1.5340 | 6.2540 | -4.1070  | C | 0 | 5.7220  | 6.8340 | 11.3000 | C | 0 | 16.7130 | 11.5820 | 13.1110 | H | 0 |
| -0.9830 | 6.3150 | -5.0460  | H | 0 | 6.1980  | 7.5640 | 10.6460 | H | 0 | 17.9320 | 12.9350 | 12.0760 | C | 0 |
| -2.5820 | 6.0650 | -4.3410  | H | 0 | 4.3830  | 7.5060 | 11.7650 | C | 0 | 18.4860 | 12.6840 | 11.1720 | H | 0 |
| -1.5340 | 7.2760 | -3.7280  | H | 0 | 4.0880  | 6.9310 | 12.6430 | H | 0 | 16.5900 | 13.6380 | 11.6600 | C | 0 |
| -0.6650 | 4.0120 | -3.9710  | C | 0 | 4.6450  | 8.4990 | 12.1300 | H | 0 | 16.1540 | 14.0790 | 12.5560 | H | 0 |
| -0.3100 | 3.1770 | -3.3660  | H | 0 | 3.2600  | 7.7450 | 10.8780 | C | 0 | 16.7570 | 14.7790 | 10.6990 | C | 0 |
| -1.6790 | 3.7740 | -4.2940  | H | 0 | 3.0240  | 6.7470 | 10.5080 | H | 0 | 17.1650 | 14.4020 | 9.7620  | H | 0 |
| -0.0570 | 4.2300 | -4.8490  | H | 0 | 2.0630  | 8.4220 | 11.5390 | C | 0 | 15.8320 | 15.3050 | 10.4610 | H | 0 |
| 0.9830  | 4.6500 | -1.4830  | C | 0 | 2.3600  | 9.4400 | 11.7920 | H | 0 | 17.4020 | 15.4790 | 11.2300 | H | 0 |
| 0.1780  | 3.9030 | -0.9000  | O | 0 | 1.2620  | 8.4480 | 10.8000 | H | 0 | 15.6170 | 12.6900 | 11.0160 | C | 0 |
| 2.2730  | 4.7040 | -1.1930  | N | 0 | 1.7810  | 7.8390 | 12.4150 | H | 0 | 15.9190 | 12.3310 | 10.0320 | H | 0 |
| 2.7530  | 5.5260 | -1.5300  | H | 0 | 3.7560  | 8.6850 | 9.7670  | C | 0 | 15.3570 | 11.8260 | 11.6270 | H | 0 |
| 3.0030  | 3.7190 | -0.3160  | C | 0 | 3.9110  | 9.6900 | 10.1600 | H | 0 | 14.7910 | 13.3220 | 10.6900 | H | 0 |
| 2.4060  | 2.8120 | -0.4080  | H | 0 | 4.6870  | 8.3660 | 9.2990  | H | 0 | 18.8010 | 13.9800 | 12.7290 | C | 0 |
| 4.3690  | 3.4120 | -0.9340  | C | 0 | 2.9700  | 8.6550 | 9.0120  | H | 0 | 18.5470 | 14.4140 | 13.8450 | O | 0 |
| 4.8790  | 4.3080 | -1.2880  | H | 0 | 6.7090  | 6.5780 | 12.4480 | C | 0 | 19.8780 | 14.3850 | 12.0490 | N | 0 |
| 4.9380  | 2.8000 | -0.2350  | H | 0 | 6.3420  | 6.7190 | 13.6300 | O | 0 | 19.9970 | 13.8840 | 11.1800 | H | 0 |
| 4.1110  | 2.3910 | -2.0910  | C | 0 | 7.9680  | 6.1470 | 12.1900 | N | 0 | 21.0530 | 15.1340 | 12.6640 | C | 0 |
| 3.7520  | 1.2380 | -1.7940  | O | 0 | 8.6640  | 5.8940 | 10.9070 | C | 0 | 21.9890 | 14.9540 | 12.1350 | H | 0 |
| 4.1890  | 2.8290 | -3.2930  | N | 0 | 8.7620  | 6.8890 | 10.4710 | H | 0 | 20.7470 | 16.5770 | 12.6930 | C | 0 |
| 4.0680  | 2.1220 | -4.0050  | H | 0 | 8.1910  | 5.1020 | 10.3260 | H | 0 | 19.7220 | 16.7440 | 13.0230 | H | 0 |
| 4.6280  | 3.6890 | -3.5890  | H | 0 | 9.9940  | 5.1980 | 11.2280 | C | 0 | 21.3720 | 17.2270 | 13.3050 | H | 0 |
| 2.9280  | 4.0740 | 1.2010   | C | 0 | 10.7640 | 5.9550 | 11.0850 | H | 0 | 20.7040 | 17.2470 | 11.2840 | C | 0 |
| 2.3360  | 5.0820 | 1.5960   | O | 0 | 10.0730 | 4.2940 | 10.6240 | H | 0 | 19.9030 | 16.8320 | 10.6730 | H | 0 |
| 3.4070  | 3.0970 | 2.0000   | N | 0 | 9.8480  | 4.8400 | 12.7210 | C | 0 | 20.3090 | 18.2390 | 11.5040 | H | 0 |
| 3.8450  | 2.3280 | 1.5120   | H | 0 | 10.7230 | 4.9020 | 13.3680 | H | 0 | 21.9660 | 17.2520 | 10.4590 | C | 0 |
| 2.9260  | 2.7210 | 3.3590   | C | 0 | 9.3530  | 3.8880 | 12.9140 | H | 0 | 22.7380 | 17.8190 | 10.9780 | H | 0 |
| 1.8660  | 2.4760 | 3.2900   | H | 0 | 8.9350  | 5.9650 | 13.2360 | C | 0 | 22.1870 | 16.2010 | 10.2720 | H | 0 |
| 3.5530  | 1.3900 | 3.7430   | C | 0 | 8.3840  | 5.5230 | 14.0670 | H | 0 | 21.7090 | 17.9680 | 9.1040  | C | 0 |
| 3.1070  | 1.1100 | 4.6970   | H | 0 | 9.6210  | 7.2130 | 13.6760 | C | 0 | 20.9530 | 17.4930 | 8.4780  | H | 0 |
| 3.1590  | 0.6120 | 3.0890   | H | 0 | 9.7920  | 8.2100 | 12.8960 | O | 0 | 21.4380 | 19.0010 | 9.3240  | H | 0 |
| 5.0610  | 1.2430 | 3.7920   | C | 0 | 10.1500 | 7.3140 | 14.8360 | N | 0 | 22.9600 | 17.9150 | 8.2530  | N | 0 |
| 5.3370  | 2.2480 | 4.1130   | H | 0 | 10.0170 | 6.5880 | 15.5260 | H | 0 | 23.2500 | 16.9540 | 8.1410  | H | 0 |
| 5.4270  | 0.5530 | 4.5530   | H | 0 | 11.0280 | 8.3890 | 15.2450 | C | 0 | 22.7510 | 18.2880 | 7.3380  | H | 0 |
| 5.7920  | 1.1800 | 2.4080   | C | 0 | 10.9890 | 9.3010 | 14.6500 | H | 0 | 23.6980 | 18.4890 | 8.6350  | H | 0 |
| 6.9510  | 1.6390 | 2.2950   | O | 0 | 10.7250 | 8.8620 | 16.6720 | C | 0 | 21.3910 | 14.6290 | 14.0540 | C | 0 |
| 5.1710  | 0.6640 | 1.4170   | O | 0 | 11.0760 | 8.1540 | 17.4230 | H | 0 | 21.5840 | 15.4790 | 14.9440 | O | 0 |
| 3.0080  | 3.8490 | 4.5130   | C | 0 | 11.1580 | 9.8420 | 16.8700 | H | 0 | 21.5500 | 13.3210 | 14.3060 | N | 0 |
| 2.5940  | 3.5570 | 5.6380   | O | 0 | 9.2300  | 9.0630 | 16.9520 | C | 0 | 21.0130 | 12.6970 | 13.7210 | H | 0 |
| 3.5490  | 5.0670 | 4.2250   | N | 0 | 8.7730  | 9.1250 | 18.1050 | O | 0 | 21.9200 | 12.6860 | 15.5600 | C | 0 |



|         |         |         |   |   |         |         |         |   |   |         |         |          |   |   |
|---------|---------|---------|---|---|---------|---------|---------|---|---|---------|---------|----------|---|---|
| 22.3290 | 11.7360 | 15.2150 | H | 0 | 9.6100  | 10.2670 | 12.8420 | H | 0 | 11.3050 | 1.2470  | 4.4880   | H | 0 |
| 22.7440 | 13.2280 | 16.0240 | H | 0 | 9.8720  | 10.7940 | 10.7330 | C | 0 | 10.6040 | 1.4460  | 2.4860   | C | 0 |
| 20.8120 | 12.6410 | 16.6730 | C | 0 | 9.9210  | 11.7530 | 10.2190 | H | 0 | 9.5650  | 1.2110  | 2.6630   | H | 0 |
| 21.0440 | 11.9440 | 17.6490 | O | 0 | 11.1770 | 10.0530 | 10.4010 | C | 0 | 8.5560  | 2.8940  | -1.6190  | C | 0 |
| 19.6810 | 13.4060 | 16.5310 | N | 0 | 11.3690 | 9.1250  | 10.9420 | H | 0 | 8.0790  | 1.8550  | -2.0490  | O | 0 |
| 19.4890 | 14.0290 | 15.7600 | H | 0 | 11.1820 | 9.8400  | 9.3320  | H | 0 | 8.4080  | 4.0590  | -2.2790  | N | 0 |
| 18.5880 | 13.4970 | 17.5640 | C | 0 | 12.5560 | 11.1590 | 10.9080 | S | 0 | 8.7170  | 4.9210  | -1.8520  | H | 0 |
| 18.9550 | 13.1390 | 18.5270 | H | 0 | 12.3320 | 11.1370 | 12.2240 | H | 0 | 7.4760  | 4.3050  | -3.3650  | C | 0 |
| 18.0990 | 14.9830 | 17.7060 | C | 0 | 8.6460  | 10.1140 | 10.0940 | C | 0 | 6.5280  | 3.9730  | -2.9430  | H | 0 |
| 17.8910 | 15.3920 | 16.7170 | H | 0 | 7.8240  | 9.5240  | 10.7700 | O | 0 | 7.2010  | 5.8210  | -3.6230  | C | 0 |
| 17.1540 | 14.9510 | 18.2470 | H | 0 | 8.4860  | 10.2200 | 8.7570  | N | 0 | 7.0780  | 6.2990  | -2.6520  | H | 0 |
| 19.0640 | 15.8600 | 18.5190 | C | 0 | 9.1920  | 10.8180 | 8.3510  | H | 0 | 8.0450  | 6.2910  | -4.1280  | H | 0 |
| 18.4180 | 16.6190 | 18.9610 | H | 0 | 7.6590  | 9.5160  | 7.8160  | C | 0 | 5.9770  | 5.9600  | -4.5060  | C | 0 |
| 19.5270 | 15.2790 | 19.3170 | H | 0 | 7.1150  | 8.8480  | 8.4840  | H | 0 | 6.0330  | 6.4390  | -5.6530  | O | 0 |
| 20.1780 | 16.4990 | 17.6710 | C | 0 | 6.7300  | 10.4430 | 7.0860  | C | 0 | 4.9500  | 5.4280  | -3.9740  | O | 0 |
| 20.8670 | 16.9860 | 18.3610 | H | 0 | 6.0200  | 10.8550 | 7.8040  | H | 0 | 7.7820  | 3.5750  | -4.6800  | C | 0 |
| 20.8140 | 15.7710 | 17.1660 | H | 0 | 7.2320  | 11.3010 | 6.6370  | H | 0 | 8.8940  | 3.1770  | -4.9530  | O | 0 |
| 19.7070 | 17.6340 | 16.7230 | C | 0 | 5.8830  | 9.8270  | 5.9600  | C | 0 | 6.7240  | 3.4160  | -5.5590  | N | 0 |
| 19.0680 | 17.2060 | 15.9520 | H | 0 | 5.8370  | 8.7390  | 6.0080  | H | 0 | 5.9060  | 3.9570  | -5.3180  | H | 0 |
| 19.1120 | 18.4010 | 17.2200 | H | 0 | 4.5380  | 10.4650 | 5.9810  | C | 0 | 6.7640  | 2.7930  | -8.6270  | C | 0 |
| 20.9000 | 18.2630 | 16.0240 | N | 0 | 3.9310  | 10.2090 | 5.1130  | H | 0 | 7.0190  | 1.7350  | -6.8050  | H | 0 |
| 21.4220 | 18.8930 | 16.6170 | H | 0 | 3.9990  | 10.4780 | 6.9290  | H | 0 | 5.4370  | 2.8390  | -7.6030  | C | 0 |
| 21.6160 | 17.5810 | 15.8190 | H | 0 | 4.7470  | 11.5350 | 5.9580  | H | 0 | 4.9110  | 3.7800  | -7.4470  | H | 0 |
| 20.5510 | 18.7890 | 15.2360 | H | 0 | 6.6040  | 10.0130 | 4.6380  | C | 0 | 5.6680  | 2.5450  | -8.6270  | H | 0 |
| 17.3320 | 12.6380 | 17.1700 | C | 0 | 6.0640  | 9.4550  | 3.8720  | H | 0 | 4.5210  | 1.7270  | -7.1310  | C | 0 |
| 16.9660 | 12.5150 | 16.0060 | O | 0 | 6.8160  | 11.0560 | 4.4050  | H | 0 | 4.8850  | 0.7870  | -7.5450  | H | 0 |
| 16.6530 | 12.0730 | 18.1570 | N | 0 | 7.5690  | 9.5220  | 4.5120  | H | 0 | 4.4250  | 1.7700  | -6.0460  | H | 0 |
| 16.8990 | 12.3150 | 19.1070 | H | 0 | 8.5850  | 8.7690  | 6.9290  | C | 0 | 3.0960  | 1.9280  | -7.5080  | C | 0 |
| 15.3480 | 11.4450 | 17.9570 | C | 0 | 9.5710  | 9.3600  | 6.4120  | O | 0 | 2.6790  | 1.0800  | -6.9650  | H | 0 |
| 15.3920 | 10.6730 | 17.1890 | H | 0 | 8.2990  | 7.5240  | 6.5850  | N | 0 | 2.8000  | 2.9150  | -7.1530  | H | 0 |
| 14.8260 | 10.8260 | 19.2950 | C | 0 | 7.5090  | 7.0820  | 7.0340  | H | 0 | 2.8690  | 1.7750  | -9.0320  | N | 0 |
| 15.4990 | 10.1180 | 19.7780 | H | 0 | 9.1310  | 6.6220  | 5.7360  | C | 0 | 3.4770  | 2.1810  | -9.7280  | H | 0 |
| 14.6200 | 11.6520 | 19.9760 | H | 0 | 9.7200  | 7.2690  | 5.0860  | H | 0 | 1.7530  | 1.2380  | -9.5500  | C | 0 |
| 13.5320 | 10.0780 | 19.0220 | C | 0 | 9.9680  | 5.6310  | 6.6140  | C | 0 | 1.1960  | 0.1620  | -8.9550  | N | 0 |
| 12.8220 | 10.8340 | 18.6880 | H | 0 | 9.3600  | 5.0270  | 7.2880  | H | 0 | 1.4600  | -0.1080 | -8.0190  | H | 0 |
| 13.7500 | 9.3000  | 18.2890 | H | 0 | 10.8730 | 4.7690  | 5.6450  | C | 0 | 0.4610  | -0.3310 | -9.4430  | H | 0 |
| 12.8860 | 9.5480  | 20.3010 | C | 0 | 10.3160 | 4.1270  | 4.9620  | H | 0 | 1.2110  | 1.5980  | -10.6920 | N | 0 |
| 13.5700 | 8.7640  | 20.6270 | H | 0 | 11.5490 | 5.4460  | 5.1240  | H | 0 | 1.7000  | 2.3280  | -11.1890 | H | 0 |
| 12.8220 | 10.2830 | 21.1040 | H | 0 | 11.5320 | 4.0900  | 6.1870  | H | 0 | 0.3800  | 1.1300  | -11.0250 | H | 0 |
| 11.4600 | 9.0590  | 20.0510 | C | 0 | 10.9380 | 6.4580  | 7.4390  | C | 0 | 7.8410  | 3.3620  | -7.7800  | C | 0 |
| 11.3820 | 8.3440  | 19.2320 | H | 0 | 10.3790 | 7.0610  | 8.1550  | H | 0 | 8.4160  | 2.5610  | -8.4730  | O | 0 |
| 11.1380 | 8.4110  | 20.8660 | H | 0 | 11.5670 | 5.6870  | 7.8830  | H | 0 | 8.0850  | 4.6620  | -7.7080  | N | 0 |
| 10.4760 | 10.1100 | 20.0230 | N | 0 | 11.5000 | 7.0340  | 6.7040  | H | 0 | 7.4750  | 5.2630  | -7.1730  | H | 0 |
| 9.6400  | 9.7400  | 19.5930 | H | 0 | 8.2360  | 5.7940  | 4.8710  | C | 0 | 9.2720  | 5.2580  | -8.4080  | C | 0 |
| 10.2470 | 10.3710 | 20.9710 | H | 0 | 7.1380  | 5.4340  | 5.3100  | O | 0 | 9.1270  | 5.1150  | -9.4790  | H | 0 |
| 10.8350 | 10.9330 | 19.5620 | H | 0 | 8.6210  | 5.5590  | 3.6680  | N | 0 | 9.0950  | 6.7890  | -8.1790  | C | 0 |
| 14.4080 | 12.4740 | 17.3160 | C | 0 | 9.5100  | 5.9500  | 3.3900  | H | 0 | 9.7710  | 7.3540  | -8.8210  | H | 0 |
| 14.0330 | 13.4880 | 17.9420 | O | 0 | 8.0170  | 4.7020  | 2.6680  | C | 0 | 8.0820  | 7.1310  | -8.3930  | H | 0 |
| 13.8560 | 12.1900 | 16.1560 | N | 0 | 7.9310  | 3.7510  | 3.1950  | H | 0 | 9.3100  | 7.1350  | -6.7750  | C | 0 |
| 14.0320 | 11.3100 | 15.6920 | H | 0 | 6.6370  | 5.1430  | 2.2640  | C | 0 | 10.3830 | 6.9610  | -6.2100  | O | 0 |
| 13.0550 | 13.1440 | 15.3560 | C | 0 | 6.0790  | 4.2810  | 1.8990  | H | 0 | 8.2860  | 7.6400  | -6.1120  | N | 0 |
| 12.8470 | 13.9440 | 16.0650 | H | 0 | 6.0010  | 5.4490  | 3.0950  | H | 0 | 8.4160  | 8.0450  | -5.1960  | H | 0 |
| 13.8270 | 13.7580 | 14.1980 | C | 0 | 6.5400  | 6.2610  | 1.2570  | C | 0 | 7.3350  | 7.7280  | -6.4420  | H | 0 |
| 14.4090 | 12.9440 | 13.7660 | H | 0 | 5.5500  | 6.3330  | 0.3340  | N | 0 | 10.6640 | 4.7290  | -8.0770  | C | 0 |
| 13.0900 | 14.5140 | 13.0800 | C | 0 | 5.8420  | 7.3230  | -0.4770 | C | 0 | 11.5340 | 5.0230  | -8.8930  | O | 0 |
| 12.0780 | 14.7910 | 13.3730 | H | 0 | 5.2820  | 7.6140  | -1.3540 | H | 0 | 10.8590 | 3.9670  | -6.9690  | N | 0 |
| 13.6910 | 15.3960 | 12.8580 | H | 0 | 7.0080  | 7.8550  | -0.0910 | N | 0 | 10.1130 | 3.9230  | -6.2900  | H | 0 |
| 13.0310 | 13.8370 | 12.2270 | H | 0 | 7.5440  | 8.4560  | -0.7010 | H | 0 | 12.0570 | 3.2270  | -6.6970  | C | 0 |
| 14.8240 | 14.6730 | 14.6420 | O | 0 | 7.4010  | 7.2950  | 1.0900  | C | 0 | 11.6830 | 2.2740  | -6.3200  | H | 0 |
| 15.6210 | 14.1800 | 14.8520 | H | 0 | 8.3560  | 7.3900  | 1.5840  | H | 0 | 12.4830 | 2.9060  | -7.6470  | H | 0 |
| 11.8660 | 12.3920 | 14.9300 | C | 0 | 8.8710  | 4.4130  | 1.4210  | C | 0 | 13.0280 | 3.8610  | -5.6900  | C | 0 |
| 12.0010 | 11.2820 | 14.3780 | O | 0 | 9.7970  | 5.2120  | 1.0710  | O | 0 | 13.9940 | 3.2130  | -5.2610  | O | 0 |
| 10.6260 | 12.8070 | 15.0660 | N | 0 | 8.6620  | 3.2890  | 0.8290  | N | 0 | 12.7120 | 5.0210  | -5.1980  | N | 0 |
| 10.2890 | 14.0430 | 15.7680 | C | 0 | 7.9370  | 2.6800  | 1.1800  | H | 0 | 11.8020 | 5.3540  | -5.4850  | H | 0 |
| 10.4510 | 14.8860 | 15.0960 | H | 0 | 9.4450  | 2.8050  | -0.2770 | C | 0 | 13.3400 | 5.7650  | -4.0860  | C | 0 |
| 10.8280 | 14.3200 | 16.6740 | H | 0 | 10.3250 | 3.4230  | -0.4590 | H | 0 | 14.3420 | 5.3380  | -4.0400  | H | 0 |
| 8.7680  | 13.9270 | 15.9970 | C | 0 | 9.8760  | 1.4230  | 0.0260  | C | 0 | 13.5960 | 7.2350  | -4.4410  | C | 0 |
| 8.2260  | 14.8720 | 16.0400 | H | 0 | 9.0420  | 0.8130  | 0.3710  | H | 0 | 12.5830 | 7.6350  | -4.4950  | H | 0 |
| 8.7090  | 13.3670 | 16.9300 | H | 0 | 10.2930 | 0.8290  | -0.7880 | H | 0 | 14.0730 | 7.7580  | -3.6120  | H | 0 |
| 8.2470  | 13.0930 | 14.8470 | C | 0 | 10.9170 | 1.5540  | 1.0890  | C | 0 | 14.3880 | 7.5310  | -5.6930  | C | 0 |
| 8.0240  | 13.5750 | 13.8950 | H | 0 | 12.2240 | 1.6610  | 0.7120  | C | 0 | 15.7720 | 7.7370  | -5.5310  | C | 0 |
| 7.4020  | 12.5350 | 15.2520 | H | 0 | 12.3920 | 1.7690  | -0.3500 | H | 0 | 16.1010 | 7.7870  | -4.5040  | H | 0 |
| 9.4590  | 12.2390 | 14.4140 | C | 0 | 13.2450 | 1.5130  | 1.6970  | C | 0 | 16.6690 | 7.7890  | -6.6210  | C | 0 |
| 9.2920  | 11.2440 | 14.8270 | H | 0 | 14.2890 | 1.5810  | 1.4300  | H | 0 | 17.7400 | 7.8380  | -6.4880  | H | 0 |
| 9.6550  | 12.2610 | 12.8040 | C | 0 | 12.9190 | 1.5520  | 3.0630  | C | 0 | 16.1170 | 7.7050  | -7.8810  | C | 0 |
| 9.8140  | 13.3670 | 12.2190 | O | 0 | 13.7070 | 1.4880  | 3.8000  | H | 0 | 16.7000 | 7.6780  | -8.7900  | H | 0 |
| 9.6740  | 11.0120 | 12.1640 | N | 0 | 11.5580 | 1.4690  | 3.4620  | C | 0 | 14.7160 | 7.5650  | -8.0560  | C | 0 |

|         |         |         |   |   |         |         |         |   |   |         |         |         |   |   |
|---------|---------|---------|---|---|---------|---------|---------|---|---|---------|---------|---------|---|---|
| 14.2940 | 7.5700  | -9.0500 | H | 0 | 9.7820  | 17.3100 | 11.0540 | O | 0 | 11.9020 | 19.7560 | 6.5300  | H | 0 |
| 13.8240 | 7.4270  | -6.9910 | C | 0 | 9.0050  | 15.2750 | 9.0810  | C | 0 | 12.5890 | 18.1430 | 6.4740  | H | 0 |
| 12.7750 | 7.1950  | -7.1090 | H | 0 | 8.4720  | 16.2600 | 8.4880  | O | 0 | 13.7120 | 19.5590 | 5.3020  | C | 0 |
| 12.7280 | 5.6320  | -2.7340 | C | 0 | 8.2880  | 14.3670 | 9.7900  | N | 0 | 13.9940 | 18.8600 | 4.5140  | H | 0 |
| 11.5320 | 5.8070  | -2.5850 | O | 0 | 8.7500  | 13.6330 | 10.3070 | H | 0 | 13.4050 | 20.5170 | 4.8820  | H | 0 |
| 13.5520 | 5.2600  | -1.7030 | N | 0 | 6.8370  | 14.3040 | 9.7240  | C | 0 | 14.7670 | 19.8590 | 6.3180  | C | 0 |
| 14.5490 | 5.3670  | -1.8300 | H | 0 | 6.7290  | 14.3060 | 8.6390  | H | 0 | 14.7520 | 19.3950 | 7.4320  | O | 0 |
| 13.0010 | 5.1930  | -0.3370 | C | 0 | 6.2110  | 12.9430 | 10.1200 | C | 0 | 15.8310 | 20.5620 | 5.8030  | N | 0 |
| 12.0100 | 4.7410  | -0.2990 | H | 0 | 5.1860  | 13.0080 | 9.7550  | H | 0 | 16.5670 | 20.7850 | 6.4570  | H | 0 |
| 13.6890 | 4.5730  | 0.2380  | H | 0 | 6.7150  | 12.1480 | 9.5700  | H | 0 | 15.9490 | 20.3780 | 4.8170  | H | 0 |
| 13.1040 | 6.5930  | 0.3620  | C | 0 | 6.1740  | 12.7400 | 11.6000 | C | 0 | 11.9220 | 17.1530 | 4.3370  | C | 0 |
| 14.2070 | 7.0430  | 0.7410  | O | 0 | 7.2450  | 12.6680 | 11.7860 | H | 0 | 11.7920 | 16.1780 | 5.0540  | O | 0 |
| 11.9830 | 7.2490  | 0.5300  | N | 0 | 5.7460  | 13.6390 | 12.0440 | H | 0 | 12.5910 | 17.0860 | 3.1680  | N | 0 |
| 11.1300 | 6.8240  | 0.1960  | H | 0 | 5.3550  | 11.4560 | 11.9280 | C | 0 | 12.6960 | 17.9600 | 2.6720  | H | 0 |
| 11.9870 | 8.5430  | 1.2060  | C | 0 | 4.3020  | 11.7300 | 11.8560 | H | 0 | 13.3310 | 15.9400 | 2.6520  | C | 0 |
| 12.8950 | 9.0950  | 0.9640  | H | 0 | 5.4950  | 10.6170 | 11.2470 | H | 0 | 12.6980 | 15.0750 | 2.8480  | H | 0 |
| 10.8550 | 9.3940  | 0.6180  | C | 0 | 5.4860  | 11.1710 | 13.4340 | N | 0 | 13.5070 | 16.1250 | 1.1530  | C | 0 |
| 9.8470  | 9.0920  | 0.9020  | H | 0 | 4.8350  | 11.5890 | 14.0830 | H | 0 | 12.5480 | 16.1900 | 0.6380  | H | 0 |
| 10.9560 | 10.3950 | 1.0380  | H | 0 | 6.2410  | 10.3170 | 14.0790 | C | 0 | 14.0080 | 17.0810 | 1.0020  | H | 0 |
| 10.8570 | 9.6050  | -0.8850 | C | 0 | 7.2840  | 9.6900  | 13.6110 | N | 0 | 14.2870 | 15.0090 | 0.4740  | C | 0 |
| 10.3680 | 8.5820  | -1.7200 | C | 0 | 7.3170  | 9.6280  | 12.6030 | H | 0 | 15.1570 | 14.8650 | 1.1140  | H | 0 |
| 10.0920 | 7.6410  | -1.2690 | H | 0 | 7.9480  | 9.2980  | 14.2630 | H | 0 | 13.5750 | 13.7090 | 0.6560  | C | 0 |
| 10.3220 | 8.7170  | -3.1480 | C | 0 | 6.0810  | 10.3050 | 15.3530 | N | 0 | 14.2520 | 12.9330 | 0.2970  | H | 0 |
| 10.0890 | 7.8820  | -3.7930 | H | 0 | 5.1850  | 10.6260 | 15.6910 | H | 0 | 13.3340 | 13.4380 | 1.6840  | H | 0 |
| 10.9240 | 9.8420  | -3.7120 | C | 0 | 6.7860  | 9.8230  | 15.8930 | H | 0 | 12.7140 | 13.6200 | -0.0050 | H | 0 |
| 10.9420 | 9.8030  | -5.0680 | O | 0 | 6.1000  | 15.6370 | 10.1790 | C | 0 | 14.9440 | 15.3490 | -0.8460 | C | 0 |
| 11.1340 | 8.8930  | -5.3050 | H | 0 | 4.9070  | 15.7080 | 9.9290  | O | 0 | 15.4010 | 14.4910 | -1.3410 | H | 0 |
| 11.3900 | 10.8770 | -2.9150 | C | 0 | 6.8000  | 16.5160 | 10.8960 | N | 0 | 14.2210 | 15.6490 | -1.6050 | H | 0 |
| 11.7040 | 11.7660 | -3.4400 | H | 0 | 7.8070  | 16.4450 | 10.9330 | H | 0 | 15.7550 | 16.0760 | -0.8140 | H | 0 |
| 11.3650 | 10.7270 | -1.5120 | C | 0 | 6.1620  | 17.7830 | 11.4590 | C | 0 | 14.6050 | 15.8340 | 3.4380  | C | 0 |
| 11.8170 | 11.5490 | -0.9750 | H | 0 | 5.1770  | 17.5660 | 11.8730 | H | 0 | 15.4930 | 16.6790 | 3.4130  | O | 0 |
| 11.9810 | 8.5480  | 2.7400  | C | 0 | 7.1230  | 18.2100 | 12.6090 | C | 0 | 14.7700 | 14.6260 | 4.1260  | N | 0 |
| 11.0900 | 7.8790  | 3.2680  | O | 0 | 8.0170  | 18.6260 | 12.1440 | H | 0 | 13.9790 | 14.0060 | 4.2250  | H | 0 |
| 12.6820 | 9.5040  | 3.4030  | N | 0 | 6.7090  | 19.0580 | 13.1540 | H | 0 | 16.0020 | 14.2610 | 4.8920  | C | 0 |
| 13.2660 | 10.0540 | 2.7900  | H | 0 | 7.6070  | 17.2020 | 13.6830 | C | 0 | 16.5450 | 15.1660 | 5.1610  | H | 0 |
| 12.5660 | 9.9620  | 4.8130  | C | 0 | 6.7380  | 16.8760 | 14.2550 | H | 0 | 15.5310 | 13.6390 | 6.2210  | C | 0 |
| 11.6570 | 9.5150  | 5.2160  | H | 0 | 7.9950  | 16.3530 | 13.1220 | H | 0 | 15.1120 | 12.6570 | 6.0010  | H | 0 |
| 13.6910 | 9.3450  | 5.7990  | C | 0 | 8.7870  | 17.7230 | 14.6100 | C | 0 | 16.6940 | 13.3440 | 7.1720  | C | 0 |
| 14.6030 | 9.9060  | 5.5980  | H | 0 | 8.4580  | 18.6460 | 15.0880 | H | 0 | 17.5000 | 12.7460 | 6.7460  | H | 0 |
| 13.2570 | 9.5900  | 7.2730  | C | 0 | 8.8690  | 17.0350 | 15.4520 | H | 0 | 17.1530 | 14.3000 | 7.4220  | H | 0 |
| 13.8140 | 8.8750  | 7.8780  | H | 0 | 9.8880  | 18.0890 | 13.8210 | N | 0 | 16.3770 | 12.9450 | 8.1350  | H | 0 |
| 13.4060 | 10.6190 | 7.6000  | H | 0 | 9.7860  | 17.8720 | 12.8390 | H | 0 | 14.4790 | 14.4000 | 7.0550  | C | 0 |
| 12.1750 | 9.4710  | 7.3220  | H | 0 | 11.0410 | 18.6010 | 14.2440 | C | 0 | 13.5320 | 14.2630 | 6.5330  | H | 0 |
| 13.8400 | 7.9080  | 5.5290  | C | 0 | 11.1550 | 18.9290 | 15.5070 | N | 0 | 14.3920 | 13.8250 | 7.9770  | H | 0 |
| 14.5910 | 7.7660  | 4.7520  | H | 0 | 10.3200 | 19.1710 | 16.0200 | H | 0 | 14.7680 | 15.9510 | 7.2710  | C | 0 |
| 14.3090 | 7.4030  | 6.3730  | H | 0 | 12.1050 | 19.0960 | 15.8080 | H | 0 | 14.9000 | 16.4610 | 6.3170  | H | 0 |
| 12.9200 | 7.4160  | 5.2130  | H | 0 | 12.0790 | 18.7800 | 13.4700 | N | 0 | 13.9050 | 16.5260 | 7.6090  | H | 0 |
| 12.3860 | 11.4370 | 4.8750  | C | 0 | 11.9530 | 18.5950 | 12.4850 | H | 0 | 15.5190 | 16.2220 | 8.0130  | H | 0 |
| 13.2760 | 12.2420 | 4.4570  | O | 0 | 12.8610 | 19.3510 | 13.7570 | H | 0 | 16.9110 | 13.3470 | 4.1070  | C | 0 |
| 11.2240 | 11.7740 | 5.4110  | N | 0 | 6.1850  | 18.8600 | 10.4350 | C | 0 | 18.1480 | 13.4800 | 4.1820  | O | 0 |
| 10.5980 | 11.0120 | 5.6260  | H | 0 | 5.5210  | 19.8240 | 10.7280 | O | 0 | 16.4380 | 12.3490 | 3.3970  | N | 0 |
| 10.8760 | 13.1980 | 5.7400  | C | 0 | 6.9950  | 18.7930 | 9.3760  | N | 0 | 15.4510 | 12.1530 | 3.4930  | H | 0 |
| 11.7140 | 13.8700 | 5.5580  | H | 0 | 7.6170  | 18.0030 | 9.2720  | H | 0 | 17.2370 | 11.5060 | 2.5100  | C | 0 |
| 9.6110  | 13.5820 | 4.8910  | C | 0 | 7.1960  | 19.9400 | 8.4560  | C | 0 | 17.9710 | 12.1030 | 1.9680  | H | 0 |
| 8.7820  | 12.9700 | 5.2470  | H | 0 | 6.3860  | 20.6560 | 8.5980  | H | 0 | 18.0060 | 10.4350 | 3.3170  | C | 0 |
| 9.3760  | 14.6100 | 5.1650  | H | 0 | 8.5260  | 20.7240 | 8.7860  | C | 0 | 18.7310 | 11.0310 | 3.8710  | H | 0 |
| 9.8160  | 13.3870 | 3.3910  | C | 0 | 8.5780  | 21.6690 | 8.2440  | H | 0 | 17.3210 | 9.7980  | 3.8760  | H | 0 |
| 10.8790 | 13.3260 | 3.1600  | H | 0 | 8.5100  | 21.2170 | 10.2150 | C | 0 | 19.0160 | 9.5230  | 2.5980  | C | 0 |
| 9.2390  | 12.0530 | 2.9050  | C | 0 | 8.8090  | 20.3830 | 10.8510 | H | 0 | 19.5690 | 9.0030  | 3.3800  | H | 0 |
| 9.7700  | 11.8450 | 1.9760  | H | 0 | 9.4030  | 21.8230 | 10.3710 | H | 0 | 18.4430 | 8.7940  | 2.0250  | H | 0 |
| 9.4390  | 11.2310 | 3.5930  | H | 0 | 7.6360  | 21.7430 | 10.5990 | H | 0 | 19.9440 | 10.3470 | 1.6700  | C | 0 |
| 8.1700  | 11.9960 | 2.7020  | H | 0 | 9.6410  | 19.9250 | 8.5650  | O | 0 | 19.4790 | 10.9360 | 0.6250  | O | 0 |
| 9.0910  | 14.4960 | 2.5860  | C | 0 | 9.6850  | 19.2670 | 9.2640  | H | 0 | 21.1770 | 10.4450 | 1.9000  | O | 0 |
| 9.5450  | 15.4850 | 2.6470  | H | 0 | 7.2670  | 19.5130 | 6.9890  | C | 0 | 16.2520 | 10.8140 | 1.5360  | C | 0 |
| 9.0580  | 14.3420 | 1.5070  | H | 0 | 6.9940  | 20.3150 | 6.0910  | O | 0 | 15.1570 | 10.4830 | 1.8900  | O | 0 |
| 8.0640  | 14.6120 | 2.9300  | H | 0 | 7.5760  | 18.3160 | 6.5910  | N | 0 | 16.6600 | 10.5060 | 0.3220  | N | 0 |
| 10.6090 | 13.4160 | 7.2380  | C | 0 | 7.7900  | 17.5500 | 7.2140  | H | 0 | 17.5530 | 10.8700 | 0.0210  | H | 0 |
| 10.2870 | 12.5250 | 7.9940  | O | 0 | 7.7040  | 17.9050 | 5.2300  | C | 0 | 15.9740 | 9.5380  | -0.5100 | C | 0 |
| 10.7620 | 14.6700 | 7.6400  | N | 0 | 7.5860  | 16.8220 | 5.2510  | H | 0 | 15.6180 | 8.7230  | 0.1210  | H | 0 |
| 11.0230 | 15.3520 | 6.9430  | H | 0 | 6.9480  | 18.3810 | 4.6070  | H | 0 | 14.8310 | 10.1790 | -1.2840 | C | 0 |
| 10.5820 | 15.1370 | 9.0240  | C | 0 | 9.0380  | 18.2520 | 4.5380  | C | 0 | 14.5190 | 9.4430  | -2.0240 | H | 0 |
| 10.8720 | 14.4190 | 9.7920  | H | 0 | 9.2200  | 18.3710 | 3.3380  | O | 0 | 14.0270 | 10.4680 | -0.6060 | H | 0 |
| 11.3530 | 16.5170 | 9.3250  | C | 0 | 10.1080 | 18.3660 | 5.3680  | N | 0 | 15.0950 | 11.1280 | -1.7520 | H | 0 |
| 12.3980 | 16.2290 | 9.4400  | H | 0 | 10.0660 | 18.2020 | 6.3640  | H | 0 | 17.0980 | 8.9650  | -1.3930 | C | 0 |
| 11.2880 | 17.1110 | 8.4130  | H | 0 | 11.4980 | 18.5310 | 4.7840  | C | 0 | 17.6780 | 9.5980  | -2.2600 | O | 0 |
| 10.8730 | 17.4210 | 10.5370 | C | 0 | 11.4550 | 19.1070 | 3.8590  | H | 0 | 17.3920 | 7.6710  | -1.2500 | N | 0 |
| 11.6680 | 18.3960 | 10.7030 | O | 0 | 12.3730 | 19.0260 | 5.8720  | C | 0 | 16.8770 | 7.1020  | -0.5950 | H | 0 |

|         |         |          |   |   |         |         |          |   |   |         |         |          |   |   |
|---------|---------|----------|---|---|---------|---------|----------|---|---|---------|---------|----------|---|---|
| 18.1850 | 6.9180  | -2.1850  | C | 0 | 19.8170 | 0.6160  | -14.1640 | C | 0 | 20.4170 | 10.2450 | -11.6270 | C | 0 |
| 18.3590 | 7.5880  | -3.0270  | H | 0 | 20.2490 | 1.1400  | -15.3400 | O | 0 | 20.6250 | 10.0820 | -12.6840 | H | 0 |
| 19.6160 | 6.7020  | -1.6240  | C | 0 | 20.8810 | 1.8550  | -15.2310 | H | 0 | 20.0370 | 11.2510 | -11.4460 | H | 0 |
| 19.5070 | 5.9710  | -0.8230  | H | 0 | 18.6060 | -0.0380 | -14.1460 | C | 0 | 21.7120 | 10.1070 | -10.9600 | C | 0 |
| 20.1910 | 6.2430  | -2.4290  | H | 0 | 17.9650 | 0.1640  | -14.9920 | H | 0 | 21.5860 | 10.1740 | -9.8800  | H | 0 |
| 20.3740 | 7.9650  | -1.1850  | C | 0 | 18.1710 | -0.7260 | -13.0270 | C | 0 | 22.1620 | 9.1270  | -11.1200 | H | 0 |
| 19.8560 | 8.4210  | -0.3410  | H | 0 | 17.1940 | -1.1860 | -13.0530 | H | 0 | 22.6930 | 11.2070 | -11.2990 | C | 0 |
| 21.3950 | 7.7500  | -0.8710  | H | 0 | 16.9350 | 0.5090  | -10.4040 | C | 0 | 23.2970 | 10.8210 | -12.1200 | H | 0 |
| 20.6080 | 8.9390  | -2.2450  | C | 0 | 15.7000 | 0.2680  | -10.5660 | O | 0 | 22.2250 | 12.1660 | -11.5220 | H | 0 |
| 20.9590 | 8.6100  | -3.3750  | O | 0 | 17.4600 | 1.7010  | -10.8230 | N | 0 | 23.7370 | 11.4180 | -10.2500 | C | 0 |
| 20.4850 | 10.2430 | -1.9610  | N | 0 | 18.4640 | 1.8030  | -10.7740 | H | 0 | 23.2020 | 12.0150 | -9.5120  | H | 0 |
| 20.6500 | 10.8500 | -2.7140  | H | 0 | 16.6510 | 2.7790  | -11.3600 | C | 0 | 24.0620 | 10.4580 | -9.5480  | H | 0 |
| 20.3410 | 10.4730 | -0.9880  | H | 0 | 15.7850 | 2.2520  | -11.7610 | H | 0 | 24.9310 | 12.1890 | -10.6980 | N | 0 |
| 17.4670 | 5.7340  | -2.7910  | C | 0 | 16.0120 | 3.7390  | -10.3670 | C | 0 | 24.7400 | 13.0630 | -11.1670 | H | 0 |
| 16.3590 | 5.4550  | -2.3200  | O | 0 | 15.5810 | 3.0750  | -9.6180  | H | 0 | 25.4920 | 12.5010 | -9.9180  | H | 0 |
| 17.9650 | 5.0400  | -3.8630  | N | 0 | 17.0870 | 4.5340  | -9.6190  | C | 0 | 25.5360 | 11.6710 | -11.3200 | H | 0 |
| 18.9910 | 5.5130  | -4.7660  | C | 0 | 17.6050 | 5.1850  | -10.3240 | H | 0 | 19.2210 | 9.3150  | -9.7350  | C | 0 |
| 19.9810 | 5.2440  | -4.3950  | H | 0 | 16.6690 | 5.1410  | -8.8160  | H | 0 | 19.5240 | 8.4410  | -8.9570  | O | 0 |
| 18.9890 | 6.5810  | -4.9820  | H | 0 | 17.8040 | 3.8430  | -9.1740  | H | 0 | 18.5440 | 10.3900 | -9.2670  | N | 0 |
| 18.6750 | 4.9060  | -6.1670  | C | 0 | 14.9290 | 4.6100  | -10.9570 | C | 0 | 18.1330 | 10.9880 | -9.9700  | H | 0 |
| 19.5130 | 4.7260  | -6.8410  | H | 0 | 13.9940 | 4.0550  | -10.8770 | H | 0 | 18.5180 | 10.7830 | -7.8510  | C | 0 |
| 17.8700 | 5.5660  | -6.4880  | H | 0 | 14.9640 | 5.5480  | -10.4020 | H | 0 | 18.3800 | 9.8880  | -7.2440  | H | 0 |
| 17.8790 | 3.6440  | -5.7440  | C | 0 | 15.0720 | 4.7760  | -12.0240 | H | 0 | 19.8410 | 11.4490 | -7.3330  | C | 0 |
| 18.5860 | 2.8150  | -5.7020  | H | 0 | 17.2900 | 3.5350  | -12.5630 | C | 0 | 19.5710 | 11.7840 | -6.3320  | H | 0 |
| 17.1710 | 3.3720  | -6.5270  | H | 0 | 18.4210 | 3.9900  | -12.4820 | O | 0 | 20.5880 | 10.6610 | -7.2430  | H | 0 |
| 17.1660 | 3.9230  | -4.3510  | C | 0 | 16.5560 | 3.7180  | -13.6820 | N | 0 | 20.4460 | 12.6320 | -8.0740  | C | 0 |
| 16.1450 | 4.2840  | -4.4710  | H | 0 | 15.5780 | 3.5070  | -13.5450 | H | 0 | 20.6980 | 12.3090 | -9.0840  | H | 0 |
| 17.2650 | 2.6530  | -3.4760  | C | 0 | 17.0400 | 4.5550  | -14.7630 | C | 0 | 19.7350 | 13.4550 | -8.1460  | H | 0 |
| 18.3170 | 2.3320  | -2.9320  | O | 0 | 17.8620 | 5.1960  | -14.4460 | H | 0 | 21.6050 | 13.2790 | -7.3650  | C | 0 |
| 16.1290 | 1.9060  | -3.3950  | N | 0 | 17.5810 | 3.6620  | -15.8960 | C | 0 | 22.4580 | 14.0260 | -7.8800  | O | 0 |
| 15.2690 | 2.2210  | -3.8210  | H | 0 | 18.1300 | 4.3220  | -16.5670 | H | 0 | 21.6450 | 13.1850 | -6.1190  | O | 0 |
| 16.0380 | 0.5800  | -2.7350  | C | 0 | 18.2060 | 2.9210  | -15.3970 | H | 0 | 17.3470 | 11.7210 | -7.6100  | C | 0 |
| 16.9170 | 0.4170  | -2.1120  | H | 0 | 16.4610 | 2.9540  | -16.7220 | C | 0 | 17.1050 | 12.5910 | -8.4110  | O | 0 |
| 14.9060 | 0.6140  | -1.6960  | C | 0 | 15.2910 | 3.2710  | -16.7320 | O | 0 | 16.8080 | 11.5750 | -6.4310  | N | 0 |
| 14.9010 | -0.3100 | -1.1190  | H | 0 | 16.8080 | 1.9640  | -17.5260 | N | 0 | 17.2850 | 10.9380 | -5.8090  | H | 0 |
| 15.1390 | 1.3960  | -0.9730  | H | 0 | 16.0590 | 1.5790  | -18.0840 | H | 0 | 16.1120 | 12.7690 | -5.7720  | C | 0 |
| 13.5360 | 0.6860  | -2.2930  | C | 0 | 17.7760 | 1.7170  | -17.6790 | H | 0 | 15.5870 | 13.3500 | -6.5300  | H | 0 |
| 12.9070 | 1.8980  | -2.5890  | C | 0 | 16.0550 | 5.6170  | -15.2310 | C | 0 | 15.0930 | 12.4030 | -4.6710  | C | 0 |
| 13.4840 | 2.7660  | -2.3080  | H | 0 | 16.4910 | 6.3630  | -16.0580 | O | 0 | 15.6310 | 11.8200 | -3.9230  | H | 0 |
| 11.6880 | 2.1110  | -3.2870  | C | 0 | 14.7710 | 5.7550  | -14.7780 | N | 0 | 14.3390 | 13.6660 | -4.2250  | C | 0 |
| 11.3310 | 3.1150  | -3.4610  | H | 0 | 14.3730 | 5.1570  | -14.0680 | H | 0 | 15.0000 | 14.3490 | -3.6910  | H | 0 |
| 11.0990 | 0.8770  | -3.6820  | C | 0 | 13.9700 | 6.9730  | -15.1320 | C | 0 | 13.7900 | 14.0910 | -5.0660  | H | 0 |
| 10.1770 | 0.8700  | -4.2450  | H | 0 | 14.0370 | 7.1560  | -16.2050 | H | 0 | 13.5460 | 13.3050 | -3.5700  | H | 0 |
| 11.6330 | -0.3640 | -3.3670  | C | 0 | 12.4780 | 6.8680  | -14.7620 | C | 0 | 14.1350 | 11.3030 | -5.2920  | C | 0 |
| 11.1280 | -1.2430 | -3.7390  | H | 0 | 11.8480 | 7.6230  | -15.2320 | H | 0 | 14.7110 | 10.3930 | -5.4570  | H | 0 |
| 12.8050 | -0.4490 | -2.6510  | C | 0 | 12.0840 | 5.8840  | -15.0160 | H | 0 | 13.4500 | 11.0210 | -4.4920  | H | 0 |
| 13.0870 | -1.4540 | -2.3760  | H | 0 | 12.3950 | 7.0820  | -13.2550 | C | 0 | 13.3950 | 11.7180 | -6.5780  | C | 0 |
| 15.9490 | -0.5230 | -3.7760  | C | 0 | 12.5250 | 6.1780  | -12.3070 | C | 0 | 12.8140 | 10.8500 | -6.8910  | H | 0 |
| 16.1270 | -1.6820 | -3.3500  | O | 0 | 12.6470 | 5.1480  | -12.6090 | H | 0 | 12.7280 | 12.5630 | -6.4070  | H | 0 |
| 15.9540 | -0.1620 | -5.0460  | N | 0 | 12.3800 | 6.6510  | -11.0400 | N | 0 | 14.0350 | 12.0330 | -7.4020  | H | 0 |
| 15.9790 | 0.8470  | -5.0970  | H | 0 | 12.3550 | 6.1090  | -10.1880 | H | 0 | 17.1160 | 13.7550 | -5.2120  | C | 0 |
| 16.1240 | -0.9700 | -6.2140  | C | 0 | 11.9820 | 7.9240  | -11.0920 | C | 0 | 17.7550 | 13.2860 | -4.2600  | O | 0 |
| 16.6370 | -1.8810 | -5.9060  | H | 0 | 11.7240 | 8.8930  | -10.1100 | C | 0 | 17.2920 | 14.8770 | -5.8120  | N | 0 |
| 14.7780 | -1.3310 | -6.8870  | C | 0 | 11.7550 | 8.6690  | -9.0540  | H | 0 | 16.5580 | 15.1680 | -6.4410  | H | 0 |
| 15.0300 | -2.0110 | -7.7000  | H | 0 | 11.2780 | 10.1050 | -10.6400 | C | 0 | 18.2710 | 15.8120 | -5.4040  | C | 0 |
| 13.8360 | -2.0730 | -5.9300  | C | 0 | 10.8910 | 10.7990 | -9.9080  | H | 0 | 19.2320 | 15.2980 | -5.3860  | H | 0 |
| 13.0040 | -2.4950 | -6.4940  | H | 0 | 11.3220 | 10.4930 | -11.9620 | C | 0 | 18.3140 | 16.8640 | -6.4620  | C | 0 |
| 14.4070 | -2.8370 | -5.4020  | H | 0 | 10.9940 | 11.4780 | -12.2590 | H | 0 | 18.5970 | 16.4120 | -7.4130  | H | 0 |
| 13.3530 | -1.3130 | -5.3160  | H | 0 | 11.7430 | 9.5430  | -12.9280 | C | 0 | 17.2680 | 17.1530 | -6.5640  | H | 0 |
| 14.0350 | -0.1260 | -7.5720  | C | 0 | 11.7690 | 9.7950  | -13.9780 | H | 0 | 19.2240 | 17.9420 | -6.1690  | O | 0 |
| 13.8110 | 0.6430  | -6.8330  | H | 0 | 12.0370 | 8.2340  | -12.4980 | C | 0 | 19.9980 | 17.8030 | -6.7200  | H | 0 |
| 14.6020 | 0.2870  | -8.4070  | H | 0 | 14.5370 | 8.2860  | -14.5540 | C | 0 | 17.9780 | 16.5220 | -4.0500  | C | 0 |
| 13.1240 | -0.5890 | -7.9500  | H | 0 | 14.4100 | 9.3400  | -15.1870 | O | 0 | 16.8020 | 16.7760 | -3.7670  | O | 0 |
| 17.0760 | -0.3410 | -7.2720  | C | 0 | 15.1190 | 8.2170  | -13.3590 | N | 0 | 18.9950 | 16.9400 | -3.3070  | N | 0 |
| 17.5450 | 0.7630  | -7.1480  | O | 0 | 15.1850 | 7.3290  | -12.8810 | H | 0 | 19.9170 | 16.7290 | -3.6630  | H | 0 |
| 17.3050 | -1.0780 | -8.4080  | N | 0 | 15.8950 | 9.2800  | -12.7820 | C | 0 | 18.9160 | 17.6680 | -2.0850  | C | 0 |
| 16.9960 | -2.0390 | -8.4320  | H | 0 | 16.2220 | 9.9490  | -13.5790 | H | 0 | 18.0300 | 17.4360 | -1.4930  | H | 0 |
| 17.8150 | -0.4180 | -9.6110  | C | 0 | 15.1210 | 10.1640 | -11.7490 | C | 0 | 20.0550 | 17.3110 | -1.1350  | C | 0 |
| 18.6500 | 0.1950  | -9.2710  | H | 0 | 14.6280 | 9.4370  | -11.1020 | H | 0 | 20.9700 | 17.8090 | -1.4570  | H | 0 |
| 18.4860 | -1.3630 | -10.6390 | C | 0 | 15.8190 | 10.7800 | -11.1820 | H | 0 | 19.8260 | 17.8010 | -0.1890  | H | 0 |
| 19.3530 | -1.8860 | -10.2350 | H | 0 | 14.3090 | 10.7420 | -12.1900 | H | 0 | 20.1220 | 15.8680 | -0.7900  | C | 0 |
| 17.7350 | -2.0780 | -10.9750 | H | 0 | 17.2060 | 8.6090  | -12.2790 | C | 0 | 19.1110 | 15.5220 | -0.5730  | H | 0 |
| 18.9790 | -0.6730 | -11.8430 | C | 0 | 17.2620 | 7.3610  | -12.0750 | O | 0 | 20.5250 | 15.3080 | -1.6340  | H | 0 |
| 20.2000 | -0.0240 | -11.8430 | C | 0 | 18.1010 | 9.4960  | -11.9230 | N | 0 | 20.9970 | 15.5600 | 0.4590   | C | 0 |
| 20.8060 | -0.0480 | -10.9500 | H | 0 | 18.0150 | 10.3960 | -12.3710 | H | 0 | 22.0160 | 15.7040 | 0.1000   | H | 0 |
| 20.6190 | 0.6720  | -12.9680 | C | 0 | 19.3820 | 9.1930  | -11.1960 | C | 0 | 20.6750 | 16.2860 | 1.2060   | H | 0 |
| 21.5930 | 1.1390  | -12.9980 | H | 0 | 19.7490 | 8.2160  | -11.5080 | H | 0 | 20.8670 | 14.1800 | 0.9500   | C | 0 |

|         |         |          |   |   |         |         |          |   |   |         |         |          |   |   |
|---------|---------|----------|---|---|---------|---------|----------|---|---|---------|---------|----------|---|---|
| 21.7540 | 13.9500 | 1.5410   | H | 0 | 11.5960 | 13.7210 | -9.5170  | C | 0 | 15.1450 | 9.4760  | -24.0460 | H | 0 |
| 19.9310 | 14.2670 | 1.5010   | H | 0 | 10.8730 | 13.5920 | -10.3220 | H | 0 | 17.0300 | 8.4390  | -23.6750 | C | 0 |
| 20.6950 | 13.2500 | -0.1050  | N | 0 | 11.2590 | 13.0880 | -8.6960  | H | 0 | 16.8190 | 7.9110  | -24.6050 | H | 0 |
| 21.4640 | 13.1460 | -0.7510  | H | 0 | 13.0160 | 13.2590 | -9.9970  | C | 0 | 17.7840 | 9.1760  | -23.9530 | H | 0 |
| 20.5000 | 12.3790 | 0.3670   | H | 0 | 12.9920 | 13.3600 | -11.0820 | H | 0 | 17.7070 | 7.4880  | -22.7290 | C | 0 |
| 19.8540 | 13.4040 | -0.6420  | H | 0 | 13.2470 | 12.2630 | -9.6210  | H | 0 | 17.6340 | 7.9540  | -21.7460 | H | 0 |
| 18.8350 | 19.1620 | -2.3320  | C | 0 | 13.9540 | 14.2500 | -9.2760  | C | 0 | 17.1580 | 6.5500  | -22.6420 | H | 0 |
| 18.0960 | 19.9220 | -1.7010  | O | 0 | 14.5330 | 13.6970 | -8.5360  | H | 0 | 19.1540 | 6.9660  | -23.1270 | C | 0 |
| 19.5960 | 19.6090 | -3.3330  | N | 0 | 14.8850 | 14.9220 | -10.2590 | C | 0 | 19.8480 | 6.5920  | -22.2060 | O | 0 |
| 20.1950 | 18.9610 | -3.8250  | H | 0 | 14.6370 | 16.0010 | -10.7670 | O | 0 | 19.5640 | 7.1600  | -24.2620 | O | 0 |
| 19.6320 | 20.9730 | -3.7110  | C | 0 | 15.9550 | 14.1180 | -10.6870 | N | 0 | 14.8550 | 7.8810  | -22.5210 | C | 0 |
| 19.7270 | 21.5780 | -2.8100  | H | 0 | 16.1200 | 13.3140 | -10.0980 | H | 0 | 14.6530 | 6.8660  | -23.1590 | O | 0 |
| 20.8100 | 21.2400 | -4.6310  | C | 0 | 16.9660 | 14.4440 | -11.7130 | C | 0 | 14.3740 | 8.0370  | -21.3230 | N | 0 |
| 20.9570 | 20.5570 | -5.4670  | H | 0 | 16.9380 | 15.4760 | -12.0630 | H | 0 | 14.6450 | 8.8440  | -20.7790 | H | 0 |
| 20.6360 | 22.2490 | -5.0040  | H | 0 | 18.2630 | 14.4240 | -10.9490 | C | 0 | 13.5480 | 7.0620  | -20.6320 | C | 0 |
| 22.1390 | 21.2110 | -3.8760  | C | 0 | 18.3720 | 13.4980 | -10.3840 | H | 0 | 13.3570 | 6.2420  | -21.3240 | H | 0 |
| 22.8930 | 21.4570 | -4.6240  | H | 0 | 19.4330 | 14.4240 | -11.9610 | C | 0 | 14.2970 | 6.5430  | -19.3950 | C | 0 |
| 22.2060 | 21.9490 | -3.0770  | H | 0 | 19.1980 | 15.0670 | -12.8090 | H | 0 | 14.3060 | 7.3230  | -18.6340 | H | 0 |
| 22.6120 | 19.8820 | -3.3820  | C | 0 | 20.3370 | 14.7890 | -11.4730 | H | 0 | 13.7510 | 5.7950  | -18.8200 | H | 0 |
| 23.2200 | 19.7700 | -2.3270  | O | 0 | 19.6100 | 13.3860 | -9.3240  | H | 0 | 15.7360 | 5.9170  | -19.4770 | C | 0 |
| 22.4520 | 18.9600 | -4.1870  | O | 0 | 18.4240 | 15.5780 | -9.9530  | C | 0 | 16.4960 | 6.5500  | -19.9350 | H | 0 |
| 18.3390 | 21.4880 | -4.3720  | C | 0 | 19.3440 | 15.5830 | -9.3690  | H | 0 | 16.0220 | 5.5100  | -18.5070 | H | 0 |
| 17.9260 | 22.6160 | -4.0810  | O | 0 | 18.4410 | 16.5160 | -10.5070 | H | 0 | 15.7020 | 4.6760  | -20.4110 | C | 0 |
| 17.8030 | 20.6810 | -5.2360  | N | 0 | 17.5550 | 15.4770 | -9.3020  | H | 0 | 14.8990 | 4.0150  | -20.0850 | H | 0 |
| 18.3260 | 19.8300 | -5.3820  | H | 0 | 16.8650 | 13.3390 | -12.7330 | C | 0 | 15.4730 | 5.0470  | -21.4100 | H | 0 |
| 16.5920 | 20.9120 | -6.0120  | C | 0 | 17.5010 | 12.2310 | -12.6930 | O | 0 | 17.0350 | 3.9990  | -20.5150 | C | 0 |
| 16.3960 | 21.9810 | -6.0950  | H | 0 | 15.8890 | 13.5390 | -13.6570 | N | 0 | 17.8330 | 4.6460  | -20.8800 | H | 0 |
| 16.7300 | 20.3820 | -7.3680  | C | 0 | 15.4090 | 14.4190 | -13.5330 | H | 0 | 17.2340 | 3.6340  | -19.5080 | H | 0 |
| 16.6430 | 19.2960 | -7.3550  | H | 0 | 15.3700 | 12.4550 | -14.5990 | C | 0 | 17.0400 | 2.8400  | -21.4810 | N | 0 |
| 15.7740 | 20.4850 | -7.8800  | H | 0 | 15.1210 | 11.5180 | -14.1010 | H | 0 | 17.8990 | 2.3200  | -21.3710 | H | 0 |
| 17.8020 | 20.9610 | -8.2540  | C | 0 | 14.0910 | 12.9330 | -15.2990 | C | 0 | 16.2980 | 2.1880  | -21.2710 | H | 0 |
| 18.2130 | 22.0730 | -7.9940  | O | 0 | 14.4420 | 13.8080 | -15.8470 | H | 0 | 16.9490 | 3.2130  | -22.4150 | H | 0 |
| 18.1390 | 20.3000 | -9.3430  | N | 0 | 13.7830 | 12.1370 | -15.9780 | H | 0 | 12.2130 | 7.7290  | -20.1950 | C | 0 |
| 18.8390 | 20.7020 | -9.9510  | H | 0 | 12.9240 | 13.1590 | -14.3920 | C | 0 | 11.3310 | 7.0270  | -19.5840 | O | 0 |
| 17.6950 | 19.5050 | -9.7810  | H | 0 | 12.7380 | 12.2010 | -13.9060 | H | 0 | 12.1160 | 9.0590  | -20.2680 | N | 0 |
| 15.3450 | 20.3700 | -5.2160  | C | 0 | 13.1510 | 13.8660 | -13.5940 | H | 0 | 13.0120 | 9.4410  | -20.5330 | H | 0 |
| 14.1990 | 20.6500 | -5.6590  | O | 0 | 11.7080 | 13.7220 | -15.1540 | C | 0 | 10.8180 | 9.7600  | -20.1940 | C | 0 |
| 15.3990 | 19.4240 | -4.2750  | N | 0 | 10.7130 | 14.1500 | -14.4630 | O | 0 | 10.1860 | 9.4320  | -19.3680 | H | 0 |
| 16.3060 | 19.0230 | -4.0850  | H | 0 | 11.6750 | 13.7220 | -16.4310 | O | 0 | 11.1420 | 11.2460 | -20.1380 | C | 0 |
| 14.2900 | 18.6400 | -3.6830  | C | 0 | 16.4030 | 12.2290 | -15.8100 | C | 0 | 11.8720 | 11.3110 | -19.3320 | H | 0 |
| 14.7510 | 17.8290 | -3.1200  | H | 0 | 17.4080 | 12.9800 | -16.0400 | O | 0 | 11.5870 | 11.6360 | -21.0530 | H | 0 |
| 13.5340 | 19.5130 | -2.7010  | C | 0 | 16.1520 | 11.0960 | -16.4940 | N | 0 | 9.8070  | 11.9880 | -19.9990 | C | 0 |
| 12.9560 | 20.2430 | -3.2670  | H | 0 | 15.3480 | 10.5250 | -16.2770 | H | 0 | 9.3310  | 12.1250 | -20.9700 | H | 0 |
| 12.8680 | 18.9060 | -2.0870  | H | 0 | 16.9740 | 10.7250 | -17.6530 | C | 0 | 9.0720  | 11.4820 | -19.3730 | H | 0 |
| 14.3580 | 20.2750 | -1.7030  | C | 0 | 17.9230 | 11.2560 | -17.7160 | H | 0 | 9.7890  | 13.3450 | -19.3080 | C | 0 |
| 14.5080 | 21.5490 | -1.7270  | O | 0 | 17.4760 | 9.1950  | -17.5690 | C | 0 | 10.7710 | 13.8170 | -19.3060 | H | 0 |
| 14.8790 | 19.6850 | -0.7750  | O | 0 | 16.5850 | 8.5690  | -17.6110 | H | 0 | 9.0460  | 13.9550 | -19.8220 | H | 0 |
| 13.2370 | 17.9580 | -4.6610  | C | 0 | 18.4150 | 8.8950  | -18.7690 | C | 0 | 9.4280  | 13.2100 | -17.9120 | N | 0 |
| 12.1910 | 17.5670 | -4.2630  | O | 0 | 18.7220 | 7.8790  | -18.5210 | H | 0 | 10.1660 | 13.1580 | -17.2250 | H | 0 |
| 13.5410 | 17.9610 | -5.9770  | N | 0 | 17.7930 | 8.8150  | -19.6610 | H | 0 | 8.2980  | 13.5490 | -17.3720 | C | 0 |
| 14.2940 | 18.5980 | -6.1970  | H | 0 | 19.2100 | 9.6320  | -18.8830 | H | 0 | 7.1920  | 13.7340 | -18.0870 | N | 0 |
| 12.8590 | 17.3550 | -7.1530  | C | 0 | 18.0060 | 8.9240  | -16.1440 | C | 0 | 7.2580  | 13.4040 | -19.0390 | H | 0 |
| 11.9830 | 16.8420 | -6.7550  | H | 0 | 17.1290 | 8.8690  | -15.4990 | H | 0 | 6.2780  | 13.8650 | -17.6780 | H | 0 |
| 12.4980 | 18.5550 | -8.0760  | C | 0 | 18.4830 | 7.9440  | -16.1680 | H | 0 | 8.3130  | 13.7480 | -16.0390 | N | 0 |
| 13.3350 | 19.2530 | -8.0400  | H | 0 | 19.1080 | 9.8830  | -15.6870 | C | 0 | 9.1030  | 13.6140 | -15.4250 | H | 0 |
| 12.3330 | 18.3180 | -9.1270  | H | 0 | 19.6400 | 9.4750  | -14.8280 | H | 0 | 7.4340  | 14.0570 | -15.6480 | H | 0 |
| 11.2840 | 19.3210 | -7.5430  | C | 0 | 19.8390 | 9.9290  | -16.4950 | H | 0 | 10.0340 | 9.4340  | -21.4600 | C | 0 |
| 10.5220 | 18.5720 | -7.7580  | H | 0 | 18.7340 | 10.8950 | -15.5320 | H | 0 | 10.5950 | 9.5600  | -22.5570 | O | 0 |
| 11.3080 | 19.4020 | -6.4560  | H | 0 | 16.1050 | 10.9690 | -18.9110 | C | 0 | 8.7830  | 9.0240  | -21.2220 | N | 0 |
| 10.9880 | 20.6520 | -8.2010  | C | 0 | 15.1390 | 10.2330 | -19.1320 | O | 0 | 8.4120  | 8.8690  | -20.2960 | H | 0 |
| 10.2110 | 21.2260 | -7.6950  | H | 0 | 16.4460 | 11.8220 | -19.8830 | N | 0 | 7.9110  | 8.4500  | -22.2430 | C | 0 |
| 11.8750 | 21.2680 | -8.0520  | H | 0 | 17.3110 | 12.9370 | -19.5580 | C | 0 | 8.5260  | 7.7920  | -22.8570 | H | 0 |
| 10.6740 | 20.5080 | -9.6320  | N | 0 | 18.3690 | 12.6770 | -19.5420 | H | 0 | 6.7640  | 7.7440  | -21.5780 | C | 0 |
| 11.4530 | 20.2740 | -10.2310 | H | 0 | 17.0230 | 13.3580 | -18.5940 | H | 0 | 6.0400  | 7.4030  | -22.3180 | H | 0 |
| 9.5940  | 20.9120 | -10.3070 | C | 0 | 17.0120 | 14.0450 | -20.5750 | C | 0 | 7.0560  | 6.6030  | -20.6070 | C | 0 |
| 8.6470  | 21.6170 | -9.8160  | N | 0 | 17.8250 | 14.6040 | -21.0380 | H | 0 | 7.6640  | 5.8800  | -21.1520 | H | 0 |
| 8.7930  | 22.0180 | -8.9010  | H | 0 | 16.2460 | 14.6930 | -20.1500 | H | 0 | 7.4880  | 6.8290  | -19.6330 | H | 0 |
| 7.8050  | 21.7540 | -10.3570 | H | 0 | 16.3970 | 13.3040 | -21.7190 | C | 0 | 6.0640  | 6.2040  | -20.3930 | H | 0 |
| 9.3220  | 20.5010 | -11.5370 | N | 0 | 17.0970 | 12.9170 | -22.4590 | H | 0 | 6.0190  | 8.6390  | -20.8580 | O | 0 |
| 9.9750  | 19.8910 | -12.0090 | H | 0 | 15.6140 | 13.9030 | -22.1840 | H | 0 | 5.8820  | 8.2500  | -19.9920 | H | 0 |
| 8.4000  | 20.7600 | -11.8560 | H | 0 | 15.6320 | 12.1930 | -21.0240 | C | 0 | 7.3510  | 9.6120  | -23.2150 | C | 0 |
| 13.7120 | 16.3090 | -7.8680  | C | 0 | 14.6750 | 12.4070 | -20.5490 | H | 0 | 7.3810  | 10.7820 | -22.7900 | O | 0 |
| 14.9170 | 16.2680 | -7.6030  | O | 0 | 15.1400 | 11.0680 | -21.8970 | C | 0 | 7.0860  | 9.2460  | -24.4710 | N | 0 |
| 13.1070 | 15.3150 | -8.6260  | N | 0 | 13.9500 | 11.0740 | -22.1870 | O | 0 | 7.1520  | 8.2500  | -24.6190 | H | 0 |
| 11.7320 | 15.2380 | -9.1410  | C | 0 | 15.9500 | 10.1370 | -22.3340 | N | 0 | 6.6450  | 10.1190 | -25.6350 | C | 0 |
| 11.6170 | 15.7840 | -10.0770 | H | 0 | 16.8980 | 10.2380 | -22.0000 | H | 0 | 6.1970  | 11.0370 | -25.2560 | H | 0 |
| 10.9620 | 15.5730 | -8.4450  | H | 0 | 15.6940 | 9.0130  | -23.2260 | C | 0 | 7.8670  | 10.6600 | -26.3620 | C | 0 |

|         |         |          |   |   |         |         |          |   |   |         |         |          |   |   |
|---------|---------|----------|---|---|---------|---------|----------|---|---|---------|---------|----------|---|---|
| 7.4610  | 11.4270 | -27.0210 | H | 0 | 11.1880 | 5.9210  | -22.5470 | H | 0 | 10.1190 | 1.5500  | -14.0360 | O | 0 |
| 8.4670  | 11.1460 | -25.5920 | H | 0 | 11.9220 | 4.3500  | -23.1460 | H | 0 | 9.6500  | -0.6710 | -14.2840 | N | 0 |
| 8.6740  | 9.6800  | -27.1540 | C | 0 | 9.9390  | 6.3440  | -24.6830 | O | 0 | 9.9320  | -1.6000 | -14.0050 | H | 0 |
| 9.0570  | 8.8480  | -26.5640 | H | 0 | 9.1170  | 6.3610  | -25.1790 | H | 0 | 8.3550  | -0.6680 | -14.9100 | C | 0 |
| 8.1180  | 9.1760  | -27.9450 | H | 0 | 10.7500 | 2.7690  | -25.0680 | C | 0 | 8.4410  | 0.0630  | -15.7140 | H | 0 |
| 9.8820  | 10.3730 | -27.8320 | C | 0 | 9.8320  | 1.9490  | -24.9330 | O | 0 | 7.9960  | -2.0600 | -15.4180 | C | 0 |
| 10.4490 | 10.7790 | -26.9940 | H | 0 | 12.0150 | 2.3830  | -24.9110 | N | 0 | 7.1440  | -1.9100 | -16.0810 | H | 0 |
| 10.4340 | 9.6030  | -28.3700 | H | 0 | 12.7270 | 3.0850  | -25.0550 | H | 0 | 8.8220  | -2.4190 | -16.0310 | H | 0 |
| 9.5410  | 11.5030 | -28.7050 | C | 0 | 12.4530 | 1.0550  | -24.3840 | C | 0 | 7.6950  | -3.1050 | -14.3380 | C | 0 |
| 8.7240  | 11.3500 | -29.4110 | H | 0 | 11.5460 | 0.4890  | -24.1730 | H | 0 | 8.1400  | -3.0240 | -13.2590 | O | 0 |
| 9.3070  | 12.2500 | -27.9470 | H | 0 | 13.3770 | 0.4020  | -25.4210 | C | 0 | 6.7880  | -4.0380 | -14.6450 | N | 0 |
| 10.7850 | 11.9910 | -29.3750 | N | 0 | 14.3770 | 0.8250  | -25.3200 | H | 0 | 6.6150  | -4.6940 | -13.8960 | H | 0 |
| 11.5110 | 12.0580 | -28.6760 | H | 0 | 13.4800 | -0.6540 | -25.1730 | H | 0 | 6.3760  | -4.0200 | -15.5670 | H | 0 |
| 11.1030 | 11.4030 | -30.1320 | H | 0 | 12.8740 | 0.5250  | -26.8730 | C | 0 | 7.1780  | -0.0550 | -14.0910 | C | 0 |
| 10.7890 | 12.9230 | -29.7630 | H | 0 | 12.8590 | -0.3620 | -27.5070 | H | 0 | 7.3820  | 0.3100  | -12.9620 | O | 0 |
| 5.5110  | 9.4600  | -26.4950 | C | 0 | 11.7940 | 0.6770  | -26.3910 | H | 0 | 5.9400  | 0.1290  | -14.6590 | N | 0 |
| 5.4480  | 8.2390  | -26.5480 | O | 0 | 13.5540 | 1.6350  | -27.6480 | C | 0 | 5.9340  | 0.1900  | -15.6670 | H | 0 |
| 4.5480  | 10.1870 | -27.1060 | N | 0 | 13.5700 | 2.5870  | -27.1180 | H | 0 | 4.9450  | 0.9900  | -13.9520 | C | 0 |
| 4.6560  | 11.1910 | -27.1340 | H | 0 | 14.5830 | 1.2730  | -27.6590 | H | 0 | 5.3910  | 1.9780  | -13.8370 | H | 0 |
| 3.4580  | 9.6810  | -27.9170 | C | 0 | 13.0260 | 1.7460  | -29.1350 | C | 0 | 3.6680  | 0.9630  | -14.8000 | C | 0 |
| 3.0180  | 8.8340  | -27.3910 | H | 0 | 13.7750 | 1.2730  | -29.7710 | H | 0 | 3.4470  | -0.0710 | -15.0650 | H | 0 |
| 2.4670  | 10.8640 | -28.0920 | C | 0 | 12.1110 | 1.1860  | -29.3310 | H | 0 | 2.8260  | 1.4120  | -14.2740 | H | 0 |
| 2.3730  | 11.1640 | -27.0490 | H | 0 | 13.0290 | 3.0800  | -29.6090 | N | 0 | 3.8740  | 1.7120  | -16.0280 | O | 0 |
| 2.8460  | 11.7160 | -28.6560 | H | 0 | 12.4350 | 3.7170  | -29.0990 | H | 0 | 3.9280  | 2.6340  | -15.7670 | H | 0 |
| 1.1070  | 10.3690 | -28.6960 | C | 0 | 13.9410 | 3.4850  | -29.4520 | H | 0 | 4.5270  | 0.5620  | -12.5280 | C | 0 |
| 1.1260  | 9.9710  | -29.7100 | H | 0 | 12.7580 | 3.2350  | -30.5700 | H | 0 | 4.2730  | 1.3690  | -11.6610 | O | 0 |
| 0.5950  | 9.5570  | -28.1790 | H | 0 | 13.1500 | 1.1220  | -23.0060 | C | 0 | 4.3090  | -0.7060 | -12.3110 | N | 0 |
| 0.0450  | 11.4360 | -28.6020 | C | 0 | 13.7760 | 2.1260  | -22.5600 | O | 0 | 4.4720  | -1.3770 | -13.0480 | H | 0 |
| 0.0990  | 12.3930 | -27.8550 | O | 0 | 13.1990 | -0.0190 | -22.3910 | N | 0 | 4.0490  | -1.4070 | -11.0520 | C | 0 |
| -0.9710 | 11.2190 | -29.3960 | N | 0 | 12.7020 | -0.7350 | -22.9010 | H | 0 | 3.1600  | -0.9390 | -10.6300 | H | 0 |
| -1.7180 | 11.8860 | -29.2640 | H | 0 | 14.0840 | -0.2680 | -21.1880 | C | 0 | 3.6930  | -2.9480 | -11.2740 | C | 0 |
| -1.0210 | 10.3960 | -29.9790 | H | 0 | 13.8280 | -1.2330 | -20.7500 | H | 0 | 3.6940  | -3.5420 | -10.3610 | H | 0 |
| 3.9910  | 9.0960  | -29.1940 | C | 0 | 15.1070 | -0.5160 | -21.4710 | H | 0 | 2.7540  | -3.0980 | -11.8070 | H | 0 |
| 5.0490  | 9.5370  | -29.6720 | O | 0 | 13.9870 | 0.6700  | -20.0020 | C | 0 | 4.7550  | -3.6060 | -12.1800 | C | 0 |
| 3.2340  | 8.1160  | -29.7570 | N | 0 | 14.9290 | 1.0490  | -19.3230 | O | 0 | 4.6180  | -3.4110 | -13.2440 | H | 0 |
| 2.6220  | 7.5830  | -29.1550 | H | 0 | 12.7270 | 1.0660  | -19.7270 | N | 0 | 5.7700  | -3.3820 | -11.8520 | H | 0 |
| 3.2990  | 7.4750  | -31.0710 | C | 0 | 12.0320 | 0.6200  | -20.3080 | H | 0 | 4.5800  | -5.4320 | -12.0440 | S | 0 |
| 2.6150  | 6.6270  | -31.1010 | H | 0 | 12.3500 | 1.8190  | -18.6040 | C | 0 | 3.0150  | -5.7590 | -12.6710 | C | 0 |
| 3.0960  | 8.1630  | -31.8920 | H | 0 | 13.0450 | 2.6470  | -18.4600 | H | 0 | 2.7460  | -5.0210 | -13.4270 | H | 0 |
| 4.6930  | 6.8950  | -31.4580 | C | 0 | 10.8900 | 2.3910  | -18.7090 | C | 0 | 2.8660  | -6.7900 | -12.9910 | H | 0 |
| 4.9080  | 6.5380  | -32.6180 | O | 0 | 10.2310 | 1.5450  | -18.8990 | H | 0 | 2.3090  | -5.5650 | -11.8630 | H | 0 |
| 5.6010  | 6.7240  | -30.4670 | N | 0 | 10.3800 | 3.0070  | -17.3960 | C | 0 | 5.2300  | -1.1460 | -10.0280 | C | 0 |
| 5.4270  | 7.0100  | -29.5140 | H | 0 | 10.4530 | 2.2260  | -16.6390 | H | 0 | 5.0550  | -1.4880 | -8.9140  | O | 0 |
| 6.8370  | 5.9940  | -30.6630 | C | 0 | 10.8540 | 3.9080  | -17.0070 | H | 0 | 6.3000  | -0.4700 | -10.4320 | N | 0 |
| 6.6890  | 5.1540  | -31.3410 | H | 0 | 9.3010  | 3.1380  | -17.4790 | H | 0 | 6.3350  | -0.3330 | -11.4320 | H | 0 |
| 7.9860  | 6.9130  | -31.1660 | C | 0 | 10.8270 | 3.4170  | -19.8780 | C | 0 | 7.3070  | 0.2170  | -9.5810  | C | 0 |
| 8.8330  | 6.2850  | -31.4450 | H | 0 | 11.0260 | 4.4330  | -19.5380 | H | 0 | 7.8820  | 0.9000  | -10.2070 | H | 0 |
| 7.6780  | 7.6870  | -32.5020 | C | 0 | 11.5030 | 3.2640  | -20.7190 | H | 0 | 6.8260  | 0.8170  | -8.8080  | H | 0 |
| 8.5570  | 8.1140  | -32.9860 | H | 0 | 9.3790  | 3.4430  | -20.4120 | C | 0 | 8.2890  | -0.7230 | -8.8950  | C | 0 |
| 7.2520  | 7.0480  | -33.2760 | H | 0 | 9.1150  | 2.4110  | -20.6440 | H | 0 | 8.3970  | -1.9150 | -9.1630  | O | 0 |
| 6.8910  | 8.4260  | -32.3490 | H | 0 | 8.7230  | 3.8150  | -19.6250 | H | 0 | 9.1330  | -0.1020 | -8.0710  | N | 0 |
| 8.5490  | 7.8740  | -30.1420 | C | 0 | 9.2360  | 4.0530  | -21.3040 | H | 0 | 9.1310  | 0.9080  | -8.0740  | H | 0 |
| 7.6840  | 8.2650  | -29.6050 | H | 0 | 12.4770 | 1.0130  | -17.3530 | C | 0 | 10.1650 | -0.7890 | -7.3960  | C | 0 |
| 9.2800  | 7.3410  | -29.5350 | H | 0 | 11.6530 | 0.0560  | -17.2040 | O | 0 | 10.7000 | -1.2980 | -8.1990  | H | 0 |
| 9.1100  | 8.6440  | -30.6720 | H | 0 | 13.3170 | 1.2550  | -16.4130 | N | 0 | 10.7630 | -0.1560 | -6.7410  | H | 0 |
| 7.2930  | 5.2430  | -29.3900 | C | 0 | 13.9710 | 2.0200  | -16.4960 | H | 0 | 9.7490  | -1.9010 | -6.3870  | C | 0 |
| 7.0390  | 5.7100  | -28.2470 | O | 0 | 13.3190 | 0.5390  | -15.0900 | C | 0 | 10.3700 | -2.9780 | -6.2630  | O | 0 |
| 7.8010  | 3.9790  | -29.4860 | N | 0 | 12.5250 | -0.2080 | -15.0750 | H | 0 | 8.6700  | -1.6320 | -5.7200  | N | 0 |
| 8.1800  | 3.6510  | -30.3630 | H | 0 | 14.6320 | -0.0890 | -14.9970 | C | 0 | 8.2780  | -0.7080 | -5.8340  | H | 0 |
| 8.3420  | 3.1660  | -28.4070 | C | 0 | 15.3780 | 0.7040  | -14.9590 | H | 0 | 7.6240  | -2.6250 | -5.3760  | C | 0 |
| 7.6040  | 3.0910  | -27.6080 | H | 0 | 14.8800 | -0.6630 | -14.1050 | H | 0 | 7.7360  | -3.4680 | -6.0570  | H | 0 |
| 8.6390  | 1.6780  | -28.8260 | C | 0 | 15.0710 | -1.2250 | -16.4260 | S | 0 | 7.7940  | -3.0030 | -3.9210  | C | 0 |
| 9.6670  | 1.7120  | -29.1860 | H | 0 | 13.2350 | 1.4870  | -13.8240 | C | 0 | 6.9720  | -3.6730 | -3.6690  | H | 0 |
| 8.7540  | 1.0240  | -27.9630 | H | 0 | 13.8680 | 2.5150  | -13.8400 | O | 0 | 8.7630  | -3.4980 | -3.8540  | H | 0 |
| 7.6330  | 1.0170  | -29.7380 | C | 0 | 12.4520 | 1.1600  | -12.7910 | N | 0 | 7.7180  | -1.7960 | -2.9430  | C | 0 |
| 6.7260  | 1.6460  | -30.3050 | O | 0 | 12.4390 | 1.9470  | -11.5910 | C | 0 | 8.5230  | -1.0890 | -3.1460  | H | 0 |
| 7.7670  | -0.1950 | -29.9740 | O | 0 | 12.2940 | 2.9940  | -11.8560 | H | 0 | 6.7600  | -1.3200 | -3.1520  | H | 0 |
| 9.5960  | 3.7870  | -27.6810 | C | 0 | 13.3780 | 1.8290  | -11.0500 | H | 0 | 7.5330  | -2.0790 | -1.4000  | C | 0 |
| 10.6680 | 3.9540  | -28.2980 | O | 0 | 11.1860 | 1.6150  | -10.7610 | C | 0 | 7.0020  | -3.0290 | -1.4590  | H | 0 |
| 9.4580  | 4.1980  | -26.4160 | N | 0 | 10.3970 | 2.3270  | -11.0030 | H | 0 | 8.4940  | -2.3040 | -0.9390  | H | 0 |
| 8.5230  | 3.9670  | -26.1120 | H | 0 | 11.3520 | 1.4840  | -9.6910  | H | 0 | 6.8670  | -0.9830 | -0.6660  | C | 0 |
| 10.5050 | 4.2650  | -25.5020 | C | 0 | 10.8010 | 0.2540  | -11.3190 | C | 0 | 6.9470  | -1.1770 | 0.4030   | H | 0 |
| 11.4170 | 4.6210  | -25.9810 | H | 0 | 9.7280  | 0.0700  | -11.2610 | H | 0 | 7.2920  | 0.0070  | -0.8280  | H | 0 |
| 10.2260 | 5.0710  | -24.2610 | C | 0 | 11.2900 | -0.4870 | -10.6860 | H | 0 | 5.4360  | -0.7400 | -0.9610  | N | 0 |
| 9.4690  | 4.6600  | -23.5930 | H | 0 | 11.4010 | 0.1350  | -12.6590 | C | 0 | 5.2750  | -0.2910 | -1.8510  | H | 0 |
| 11.4690 | 5.3080  | -23.4030 | C | 0 | 11.8640 | -0.8440 | -12.7810 | H | 0 | 4.7740  | -1.4960 | -0.8550  | H | 0 |
| 12.2060 | 5.8920  | -23.9540 | H | 0 | 10.3310 | 0.3670  | -13.7270 | C | 0 | 5.0700  | -0.0430 | -0.3280  | H | 0 |

|         |         |         |   |   |         |         |         |   |   |         |         |         |   |   |
|---------|---------|---------|---|---|---------|---------|---------|---|---|---------|---------|---------|---|---|
| 6.4060  | -2.0320 | -5.7950 | C | 0 | 8.8570  | -4.9610 | 7.6660  | H | 0 | 16.4040 | -2.8600 | 13.1870 | O | 0 |
| 6.3290  | -0.9300 | -6.3180 | O | 0 | 8.2510  | -4.3870 | 9.2640  | H | 0 | 16.3700 | -3.5450 | 12.5150 | H | 0 |
| 5.3000  | -2.6570 | -5.4770 | N | 0 | 7.1140  | -4.7690 | 8.0710  | H | 0 | 17.8390 | -0.7570 | 14.3470 | C | 0 |
| 5.4620  | -3.4420 | -4.8630 | H | 0 | 9.6520  | -2.3850 | 8.4770  | C | 0 | 18.8430 | -0.3190 | 13.8970 | O | 0 |
| 3.9290  | -2.1080 | -5.5040 | C | 0 | 10.5680 | -2.0460 | 7.7030  | O | 0 | 16.7120 | -0.0340 | 14.3620 | N | 0 |
| 3.8800  | -1.0610 | -5.8050 | H | 0 | 9.6730  | -2.3860 | 9.8480  | N | 0 | 15.8090 | -0.3340 | 14.6980 | H | 0 |
| 2.9670  | -2.9360 | -6.3890 | C | 0 | 8.8560  | -2.7690 | 10.3020 | H | 0 | 16.6480 | 1.2450  | 13.6600 | C | 0 |
| 3.4530  | -3.0390 | -7.3590 | H | 0 | 10.6710 | -1.6940 | 10.6390 | C | 0 | 15.8070 | 1.8050  | 14.0680 | H | 0 |
| 2.7870  | -3.9220 | -5.9610 | H | 0 | 11.6440 | -1.8440 | 10.1710 | H | 0 | 17.5540 | 1.7940  | 13.9170 | H | 0 |
| 1.6600  | -2.2320 | -6.7850 | C | 0 | 10.2330 | -0.2590 | 10.8610 | C | 0 | 16.4560 | 1.1750  | 12.0960 | C | 0 |
| 0.7960  | -2.8380 | -7.4050 | O | 0 | 10.0530 | 0.2930  | 9.9380  | H | 0 | 16.6340 | 2.2370  | 11.4980 | O | 0 |
| 1.5490  | -1.0380 | -6.4980 | O | 0 | 9.1980  | -0.3300 | 11.1970 | H | 0 | 16.2880 | -0.0770 | 11.6210 | N | 0 |
| 3.4150  | -2.0910 | -4.0270 | C | 0 | 11.0220 | 0.6950  | 11.7630 | C | 0 | 16.3250 | -0.8180 | 12.3060 | H | 0 |
| 4.1670  | -2.3310 | -3.0550 | O | 0 | 12.2490 | 1.1860  | 11.3420 | C | 0 | 16.3660 | -0.3880 | 10.2090 | C | 0 |
| 2.0820  | -1.7840 | -3.8600 | N | 0 | 12.5590 | 0.8820  | 10.3530 | H | 0 | 16.6430 | 0.4970  | 9.6360  | H | 0 |
| 1.6120  | -1.5900 | -4.7330 | H | 0 | 13.0380 | 1.9930  | 12.1820 | C | 0 | 17.5610 | -1.3960 | 9.9700  | C | 0 |
| 1.4650  | -1.4850 | -2.5680 | C | 0 | 13.9860 | 2.3480  | 11.8080 | H | 0 | 17.2500 | -2.3260 | 10.4440 | H | 0 |
| 2.0310  | -0.6480 | -2.1580 | H | 0 | 12.4830 | 2.3960  | 13.3960 | C | 0 | 17.4490 | -1.6550 | 8.9170  | H | 0 |
| 0.0050  | -0.9540 | -2.7010 | C | 0 | 13.1080 | 3.0370  | 14.0000 | H | 0 | 18.9770 | -1.0470 | 10.2940 | C | 0 |
| -0.4780 | -0.7680 | -1.7410 | H | 0 | 11.2450 | 1.9110  | 13.9120 | C | 0 | 19.0450 | -0.9750 | 11.3800 | H | 0 |
| -0.2190 | 0.0040  | -3.1700 | H | 0 | 10.9310 | 2.2870  | 14.8750 | H | 0 | 19.9270 | -2.1100 | 9.9480  | C | 0 |
| -0.8950 | -1.9690 | -3.4930 | C | 0 | 10.4870 | 1.0770  | 12.9910 | C | 0 | 20.9020 | -1.6580 | 10.1290 | H | 0 |
| -1.9320 | -1.6350 | -3.5420 | H | 0 | 9.5410  | 0.6110  | 13.2260 | H | 0 | 19.7670 | -3.0370 | 10.4980 | H | 0 |
| -0.5080 | -2.2030 | -4.4850 | H | 0 | 10.8730 | -2.3360 | 12.0010 | C | 0 | 19.9010 | -2.2800 | 8.8710  | H | 0 |
| -1.0440 | -3.4080 | -2.9100 | C | 0 | 10.1350 | -3.2710 | 12.3010 | O | 0 | 19.4030 | 0.2540  | 9.5510  | C | 0 |
| -1.2820 | -3.5360 | -1.7250 | O | 0 | 11.8990 | -2.0000 | 12.7680 | N | 0 | 19.3660 | 0.1750  | 8.4640  | H | 0 |
| -1.1950 | -4.5170 | -3.6240 | N | 0 | 12.5480 | -1.3300 | 12.3810 | H | 0 | 18.7770 | 1.0610  | 9.9330  | H | 0 |
| -1.0650 | -5.3310 | -3.0410 | H | 0 | 12.1620 | -2.4900 | 14.1510 | C | 0 | 20.4280 | 0.4820  | 9.8420  | H | 0 |
| -1.0050 | -4.4720 | -4.6150 | H | 0 | 11.1720 | -2.8440 | 14.4400 | H | 0 | 14.9730 | -0.8070 | 9.6670  | C | 0 |
| 1.6530  | -2.4720 | -1.3760 | C | 0 | 13.0700 | -3.7030 | 14.2620 | C | 0 | 13.9590 | -1.0620 | 10.3050 | O | 0 |
| 1.0080  | -2.1840 | -0.3620 | O | 0 | 12.5770 | -4.4550 | 13.6450 | H | 0 | 14.9190 | -0.9250 | 8.3250  | N | 0 |
| 2.3800  | -3.5570 | -1.4800 | N | 0 | 14.0420 | -3.4100 | 13.8660 | H | 0 | 15.7530 | -0.8380 | 7.7610  | H | 0 |
| 2.8980  | -3.6990 | -2.3350 | H | 0 | 13.2280 | -4.1370 | 15.6060 | O | 0 | 13.7080 | -1.1600 | 7.5400  | C | 0 |
| 2.7470  | -4.4240 | -0.3420 | C | 0 | 13.2920 | -5.0950 | 15.5750 | H | 0 | 12.9040 | -1.1550 | 8.2760  | H | 0 |
| 1.8800  | -4.5250 | 0.3110  | H | 0 | 12.7760 | -1.3810 | 14.9850 | C | 0 | 13.4770 | 0.0760  | 6.6590  | C | 0 |
| 3.2330  | -5.8100 | -0.7060 | C | 0 | 13.8960 | -0.9390 | 14.7080 | O | 0 | 14.3810 | 0.2460  | 6.0740  | H | 0 |
| 3.4070  | -6.4030 | 0.1920  | H | 0 | 12.1570 | -1.0890 | 16.1780 | N | 0 | 12.6590 | -0.1050 | 5.9610  | H | 0 |
| 2.4320  | -6.4740 | -1.0290 | H | 0 | 10.7400 | -1.1580 | 16.4320 | C | 0 | 13.2060 | 1.2740  | 7.4700  | C | 0 |
| 4.4800  | -5.8000 | -1.6740 | C | 0 | 10.4670 | -2.0370 | 17.0160 | H | 0 | 14.2240 | 2.1860  | 7.8840  | C | 0 |
| 4.9030  | -4.7990 | -1.5810 | H | 0 | 10.1290 | -1.0890 | 15.5320 | H | 0 | 15.2730 | 2.0280  | 7.6830  | H | 0 |
| 5.2830  | -6.4970 | -1.4360 | H | 0 | 10.5270 | 0.0070  | 17.3760 | C | 0 | 13.8480 | 3.2930  | 8.6950  | C | 0 |
| 4.1490  | -5.9270 | -3.1570 | C | 0 | 9.7150  | -0.1890 | 18.0770 | H | 0 | 14.6460 | 3.9180  | 9.0690  | H | 0 |
| 4.9140  | -5.9150 | -4.1220 | O | 0 | 10.3870 | 0.8900  | 16.7530 | H | 0 | 12.4940 | 3.5740  | 8.9680  | C | 0 |
| 2.9110  | -6.0550 | -3.4650 | N | 0 | 11.7870 | 0.0390  | 18.1820 | C | 0 | 12.1340 | 4.3150  | 9.6660  | H | 0 |
| 2.6330  | -6.0820 | -4.4350 | H | 0 | 11.8120 | -0.7940 | 18.8840 | H | 0 | 11.4960 | 2.6430  | 8.4480  | C | 0 |
| 2.2610  | -6.0220 | -2.6930 | H | 0 | 11.8820 | 1.0220  | 18.6430 | H | 0 | 10.4420 | 2.8480  | 8.5630  | H | 0 |
| 3.6800  | -3.8030 | 0.6290  | C | 0 | 12.8690 | -0.2430 | 17.1450 | C | 0 | 11.8490 | 1.6050  | 7.6150  | C | 0 |
| 4.6740  | -3.2320 | 0.2030  | O | 0 | 13.1280 | 0.6460  | 16.5700 | H | 0 | 11.0940 | 0.9750  | 7.1680  | H | 0 |
| 3.3500  | -3.6180 | 1.9570  | N | 0 | 14.1230 | -0.8160 | 17.7530 | C | 0 | 13.8300 | -2.5110 | 6.8460  | C | 0 |
| 2.1780  | -4.1350 | 2.6420  | C | 0 | 14.8730 | 0.0190  | 18.1700 | O | 0 | 14.9070 | -2.9460 | 6.4270  | O | 0 |
| 2.2670  | -5.2210 | 2.6110  | H | 0 | 14.4200 | -2.1090 | 17.6330 | N | 0 | 12.6490 | -3.1030 | 6.5310  | N | 0 |
| 1.2860  | -3.7260 | 2.1680  | H | 0 | 13.7300 | -2.6230 | 17.1030 | H | 0 | 11.7720 | -2.7420 | 6.8790  | H | 0 |
| 2.2850  | -3.6910 | 4.0170  | C | 0 | 15.6030 | -2.8080 | 18.1520 | C | 0 | 12.6210 | -4.4780 | 5.9860  | C | 0 |
| 2.7200  | -4.4440 | 4.6740  | H | 0 | 15.7120 | -2.3940 | 19.1540 | H | 0 | 13.6140 | -4.6830 | 5.5850  | H | 0 |
| 1.2840  | -3.5090 | 4.4080  | H | 0 | 15.4220 | -4.3490 | 18.1530 | C | 0 | 12.4390 | -5.4420 | 7.1330  | C | 0 |
| 3.0760  | -2.4050 | 4.0040  | C | 0 | 15.4060 | -4.7090 | 17.1240 | H | 0 | 11.4440 | -5.2950 | 7.5540  | H | 0 |
| 3.7560  | -2.3200 | 4.8520  | H | 0 | 16.3160 | -4.7670 | 18.6170 | H | 0 | 12.4890 | -6.4510 | 6.7240  | H | 0 |
| 2.4380  | -1.5340 | 3.8510  | H | 0 | 14.3590 | -4.7570 | 19.1050 | C | 0 | 13.4430 | -5.4100 | 8.2800  | C | 0 |
| 3.9500  | -2.5290 | 2.8040  | C | 0 | 14.6390 | -4.4770 | 20.1200 | H | 0 | 14.7070 | -5.9650 | 8.0290  | C | 0 |
| 3.9580  | -1.5720 | 2.2840  | H | 0 | 13.4000 | -4.3500 | 18.7860 | H | 0 | 14.9450 | -6.3720 | 7.0580  | H | 0 |
| 5.3640  | -2.8880 | 3.1480  | C | 0 | 14.1570 | -6.2180 | 19.1620 | C | 0 | 15.6660 | -5.9670 | 9.1170  | C | 0 |
| 5.6630  | -4.0870 | 3.1500  | O | 0 | 14.2470 | -6.9320 | 18.1620 | O | 0 | 16.5370 | -6.5950 | 8.9970  | H | 0 |
| 6.2120  | -1.9050 | 3.4250  | N | 0 | 13.8350 | -6.8450 | 20.3120 | N | 0 | 15.3620 | -5.2970 | 10.3310 | C | 0 |
| 5.8630  | -0.9590 | 3.4880  | H | 0 | 13.4090 | -7.7430 | 20.1300 | H | 0 | 16.2740 | -5.1650 | 11.2960 | O | 0 |
| 7.4940  | -2.1860 | 4.1070  | C | 0 | 13.5440 | -6.3390 | 21.1360 | H | 0 | 16.8180 | -5.9410 | 11.4500 | H | 0 |
| 7.9240  | -3.1170 | 3.7370  | H | 0 | 16.8610 | -2.4560 | 17.2730 | C | 0 | 14.0800 | -4.7500 | 10.5010 | C | 0 |
| 8.4800  | -1.0990 | 3.6060  | C | 0 | 17.9490 | -2.1010 | 17.8460 | O | 0 | 13.7840 | -4.2530 | 11.4130 | H | 0 |
| 8.4660  | -1.0770 | 2.5160  | H | 0 | 16.6580 | -2.4090 | 15.9770 | N | 0 | 13.1330 | -4.9230 | 9.5280  | C | 0 |
| 8.1280  | -0.1690 | 4.0530  | H | 0 | 15.7520 | -2.6630 | 15.6090 | H | 0 | 12.1650 | -4.4970 | 9.7450  | H | 0 |
| 9.4980  | -1.0900 | 3.9940  | H | 0 | 17.7880 | -2.1480 | 14.9890 | C | 0 | 11.5790 | -4.5420 | 4.8820  | C | 0 |
| 7.2340  | -2.1710 | 5.6450  | C | 0 | 18.7270 | -2.4110 | 15.4770 | H | 0 | 10.4550 | -4.1800 | 5.2120  | O | 0 |
| 6.1540  | -1.7000 | 6.0350  | O | 0 | 17.5930 | -3.1120 | 13.8440 | C | 0 | 12.0300 | -4.6980 | 3.6630  | N | 0 |
| 8.2410  | -2.5890 | 6.4390  | N | 0 | 18.3310 | -3.0690 | 13.0430 | H | 0 | 12.9680 | -5.0350 | 3.5030  | H | 0 |
| 9.0690  | -2.9080 | 5.9580  | H | 0 | 17.5870 | -4.5940 | 14.3250 | C | 0 | 11.3420 | -4.1450 | 2.4970  | C | 0 |
| 8.2970  | -2.8210 | 7.8730  | C | 0 | 16.9420 | -5.2560 | 13.7470 | H | 0 | 10.3530 | -3.8230 | 2.8240  | H | 0 |
| 7.5110  | -2.1970 | 8.2960  | H | 0 | 18.5550 | -5.0950 | 14.3550 | H | 0 | 11.9740 | -2.8790 | 1.9260  | C | 0 |
| 8.1150  | -4.3520 | 8.1830  | C | 0 | 17.1590 | -4.7130 | 15.3200 | H | 0 | 12.8980 | -3.1710 | 1.4260  | H | 0 |

|         |         |          |   |   |         |         |          |   |   |          |         |          |   |   |
|---------|---------|----------|---|---|---------|---------|----------|---|---|----------|---------|----------|---|---|
| 11.0920 | -2.1950 | 0.9120   | C | 0 | 7.6040  | -7.1070 | -11.4460 | C | 0 | 4.4770   | 3.7650  | -29.6340 | H | 0 |
| 10.1020 | -1.9970 | 1.3220   | H | 0 | 7.9730  | -6.1760 | -11.0170 | H | 0 | 2.6460   | 2.6970  | -29.9780 | C | 0 |
| 11.5070 | -1.2160 | 0.6710   | H | 0 | 7.1260  | -6.9760 | -12.4180 | H | 0 | 2.0200   | 3.3150  | -30.8750 | O | 0 |
| 11.0210 | -2.7920 | 0.0030   | H | 0 | 6.8890  | -7.5470 | -10.7510 | H | 0 | 2.4970   | 1.4640  | -29.9030 | O | 0 |
| 12.2850 | -1.8140 | 2.9810   | C | 0 | 11.1930 | -4.2390 | -14.5390 | C | 0 | 3.1160   | 4.5490  | -26.1160 | C | 0 |
| 11.4110 | -1.4620 | 3.5280   | H | 0 | 11.2180 | -3.2640 | -13.8570 | O | 0 | 2.1450   | 4.0010  | -25.5260 | O | 0 |
| 13.1190 | -2.2250 | 3.5490   | H | 0 | 11.2280 | -4.2300 | -15.8400 | N | 0 | 3.1430   | 5.9120  | -26.1750 | N | 0 |
| 12.7290 | -0.9660 | 2.4590   | H | 0 | 11.2250 | -5.1290 | -16.3010 | H | 0 | 3.9670   | 6.4090  | -26.4820 | H | 0 |
| 11.1360 | -5.2710 | 1.4890   | C | 0 | 11.4720 | -3.0920 | -16.7930 | C | 0 | 1.9720   | 6.7350  | -25.7120 | C | 0 |
| 12.1880 | -5.8920 | 1.1410   | O | 0 | 11.2630 | -2.1030 | -16.3860 | H | 0 | 1.6380   | 6.3410  | -24.7520 | H | 0 |
| 9.8960  | -5.6280 | 0.9800   | N | 0 | 12.9150 | -3.1690 | -17.3260 | C | 0 | 2.1060   | 7.8130  | -25.6330 | H | 0 |
| 8.6130  | -5.0160 | 1.4260   | C | 0 | 12.9920 | -4.1430 | -17.8090 | H | 0 | 0.8250   | 6.6680  | -26.6940 | C | 0 |
| 8.6290  | -3.9330 | 1.3020   | H | 0 | 12.9560 | -2.2830 | -17.9590 | H | 0 | 1.1080   | 6.6870  | -27.8840 | O | 0 |
| 8.4280  | -5.2980 | 2.4620   | H | 0 | 14.2980 | -3.0980 | -16.1160 | S | 0 | -0.3870  | 6.6400  | -26.2620 | N | 0 |
| 7.5080  | -5.6310 | 0.5520   | C | 0 | 10.6220 | -3.2060 | -18.0240 | C | 0 | -0.5230  | 6.9490  | -25.3110 | H | 0 |
| 7.0920  | -4.8970 | -0.1380  | H | 0 | 10.0330 | -4.2960 | -18.2550 | O | 0 | -1.5910  | 6.5250  | -27.0880 | C | 0 |
| 6.6100  | -5.9840 | 1.0590   | H | 0 | 10.4540 | -2.0880 | -18.7730 | N | 0 | -1.2920  | 6.6160  | -28.1320 | H | 0 |
| 8.1740  | -6.8430 | -0.1700  | C | 0 | 10.9680 | -1.2650 | -18.4920 | H | 0 | -2.1650  | 5.0780  | -26.8770 | C | 0 |
| 7.8900  | -6.8800 | -1.2210  | H | 0 | 9.4070  | -2.0400 | -19.8950 | C | 0 | -2.1710  | 4.9020  | -25.8020 | H | 0 |
| 8.0840  | -7.6970 | 0.5010   | H | 0 | 9.2010  | -3.0630 | -20.2090 | H | 0 | -3.6370  | 4.9260  | -27.3400 | C | 0 |
| 9.6560  | -6.4910 | -0.1560  | C | 0 | 8.1310  | -1.5920 | -19.2000 | C | 0 | -4.1590  | 4.0880  | -26.8790 | H | 0 |
| 10.2780 | -7.3830 | -0.0920  | H | 0 | 7.2510  | -1.8180 | -19.8030 | H | 0 | -4.2820  | 5.7690  | -27.0940 | H | 0 |
| 10.0760 | -5.6860 | -1.4320  | C | 0 | 8.1200  | -2.0700 | -18.2200 | H | 0 | -3.7290  | 4.8870  | -28.4250 | H | 0 |
| 9.6600  | -4.5340 | -1.4810  | O | 0 | 7.9680  | -0.0630 | -18.8290 | C | 0 | -1.3130  | 3.9670  | -27.5350 | C | 0 |
| 10.8420 | -6.3230 | -2.3060  | N | 0 | 8.7360  | 0.1770  | -18.0940 | H | 0 | -1.1920  | 4.0930  | -28.6110 | H | 0 |
| 11.2710 | -7.2130 | -2.1000  | H | 0 | 8.0810  | 0.4950  | -19.7590 | H | 0 | -0.3150  | 3.8980  | -27.1020 | H | 0 |
| 11.1140 | -5.7180 | -3.6930  | C | 0 | 6.4610  | 0.2950  | -18.0340 | S | 0 | -1.7010  | 2.9590  | -27.3860 | H | 0 |
| 10.5120 | -4.8330 | -3.9020  | H | 0 | 6.2250  | 2.0380  | -18.4880 | C | 0 | -2.5850  | 7.6970  | -26.7540 | C | 0 |
| 12.5920 | -5.1680 | -3.8590  | C | 0 | 5.1500  | 2.1670  | -18.3640 | H | 0 | -2.8220  | 7.9440  | -25.5740 | O | 0 |
| 12.6040 | -4.6440 | -4.8150  | H | 0 | 6.7190  | 2.7470  | -17.8230 | H | 0 | -3.2500  | 8.2430  | -27.7830 | N | 0 |
| 13.1320 | -4.4120 | -2.6760  | C | 0 | 6.2930  | 2.1650  | -19.5690 | H | 0 | -3.0190  | 7.9920  | -28.7340 | H | 0 |
| 14.1770 | -4.1970 | -2.9020  | H | 0 | 9.6250  | -1.1570 | -21.1600 | C | 0 | -4.1370  | 9.3480  | -27.5090 | C | 0 |
| 12.5370 | -3.5030 | -2.5960  | H | 0 | 10.3500 | -0.1760 | -21.1660 | O | 0 | -3.6980  | 10.1760 | -26.9520 | H | 0 |
| 13.0350 | -4.9670 | -1.7430  | H | 0 | 8.9500  | -1.5170 | -22.2620 | N | 0 | -4.4940  | 10.0400 | -28.8230 | C | 0 |
| 13.4990 | -6.1820 | -4.1330  | O | 0 | 8.3170  | -2.2980 | -22.1610 | H | 0 | -3.6580  | 10.0650 | -29.5210 | H | 0 |
| 13.5520 | -6.8000 | -3.4000  | H | 0 | 8.7260  | -0.6600 | -23.4450 | C | 0 | -5.2200  | 9.3780  | -29.2960 | H | 0 |
| 10.8800 | -6.5940 | -4.8930  | C | 0 | 9.5560  | 0.0440  | -23.5190 | H | 0 | -5.1520  | 11.4030 | -28.6750 | C | 0 |
| 10.9280 | -7.8120 | -4.7340  | O | 0 | 8.6440  | -1.4540 | -24.7250 | C | 0 | -5.7740  | 11.6400 | -29.5390 | H | 0 |
| 10.5810 | -6.0090 | -6.0250  | N | 0 | 7.7690  | -2.0830 | -24.5610 | H | 0 | -5.7540  | 11.4540 | -27.7690 | H | 0 |
| 10.5810 | -4.9990 | -5.9880  | H | 0 | 8.4730  | -0.8750 | -25.6330 | H | 0 | -4.0630  | 12.4510 | -28.5160 | C | 0 |
| 10.4020 | -6.7490 | -7.3190  | C | 0 | 9.8990  | -2.3650 | -24.8250 | C | 0 | -3.5050  | 12.8260 | -29.5760 | O | 0 |
| 10.5520 | -7.8240 | -7.2180  | H | 0 | 11.0030 | -2.0930 | -24.3930 | O | 0 | -3.9330  | 13.0550 | -27.4470 | O | 0 |
| 8.9230  | -6.5070 | -7.7330  | C | 0 | 9.7360  | -3.5700 | -25.3260 | N | 0 | -5.4090  | 8.8900  | -26.7620 | C | 0 |
| 8.7030  | -5.4890 | -8.0540  | H | 0 | 10.5830 | -4.1190 | -25.2870 | H | 0 | -6.2780  | 8.1140  | -27.2160 | O | 0 |
| 8.7340  | -7.1350 | -8.6040  | H | 0 | 8.9260  | -3.8740 | -25.8470 | H | 0 | -5.5830  | 9.4220  | -25.5520 | N | 0 |
| 7.9230  | -6.9020 | -6.6040  | C | 0 | 7.4480  | 0.1570  | -23.2370 | C | 0 | -4.9150  | 10.1600 | -25.3840 | H | 0 |
| 8.1860  | -7.9180 | -5.9890  | O | 0 | 6.5490  | -0.3360 | -22.5980 | O | 0 | -6.7180  | 9.2030  | -24.6540 | C | 0 |
| 7.0530  | -5.9950 | -6.2800  | N | 0 | 7.2710  | 1.3710  | -23.7820 | N | 0 | -7.2710  | 8.2840  | -24.8480 | H | 0 |
| 6.3730  | -6.1370 | -5.5470  | H | 0 | 8.0950  | 1.7930  | -24.1850 | H | 0 | -6.1170  | 8.9880  | -23.2490 | C | 0 |
| 6.9450  | -5.2640 | -6.9690  | H | 0 | 5.9950  | 2.2040  | -23.6830 | C | 0 | -5.4930  | 8.0960  | -23.2860 | H | 0 |
| 11.3850 | -6.1380 | -8.3450  | C | 0 | 5.1300  | 1.5500  | -23.5770 | H | 0 | -5.5020  | 9.8130  | -22.8910 | H | 0 |
| 11.6680 | -4.8760 | -8.3240  | O | 0 | 6.1350  | 3.0760  | -22.5410 | C | 0 | -6.8880  | 8.8600  | -22.4890 | H | 0 |
| 11.8410 | -6.9640 | -9.3240  | N | 0 | 6.3550  | 2.4950  | -21.6450 | H | 0 | -7.8190  | 10.4030 | -24.7440 | C | 0 |
| 11.4630 | -7.9000 | -9.2890  | H | 0 | 7.0350  | 3.6860  | -22.6200 | H | 0 | -7.4430  | 11.5650 | -24.6570 | O | 0 |
| 12.7970 | -6.5890 | -10.3600 | C | 0 | 4.9870  | 3.9540  | -22.2040 | C | 0 | -9.0700  | 10.1520 | -24.9510 | N | 0 |
| 13.0350 | -5.5260 | -10.3520 | H | 0 | 4.6980  | 5.1000  | -22.9720 | C | 0 | -9.3570  | 9.1960  | -25.1040 | H | 0 |
| 14.1100 | -7.4040 | -10.0830 | C | 0 | 5.3580  | 5.3380  | -23.7940 | H | 0 | -10.1530 | 11.1000 | -24.6300 | C | 0 |
| 14.3820 | -7.3070 | -9.0320  | H | 0 | 3.6320  | 5.9610  | -22.7150 | C | 0 | -9.6890  | 12.0160 | -24.2640 | H | 0 |
| 13.8070 | -8.4390 | -10.2370 | H | 0 | 3.4520  | 6.8520  | -23.2990 | H | 0 | -10.9370 | 11.5850 | -25.8330 | C | 0 |
| 15.2710 | -6.9140 | -10.9110 | C | 0 | 2.6790  | 5.5490  | -21.7870 | C | 0 | -11.5170 | 10.7170 | -26.1490 | H | 0 |
| 15.4720 | -5.7110 | -10.9620 | O | 0 | 1.5720  | 6.3520  | -21.5820 | O | 0 | -11.8610 | 12.7570 | -25.6140 | C | 0 |
| 15.9650 | -7.8460 | -11.5300 | N | 0 | 1.1050  | 6.5710  | -22.3920 | H | 0 | -12.4820 | 12.8140 | -26.5090 | H | 0 |
| 16.7380 | -7.5760 | -12.1200 | H | 0 | 3.0000  | 4.4230  | -20.9320 | C | 0 | -12.5680 | 12.5400 | -24.8130 | H | 0 |
| 15.6080 | -8.7900 | -11.5120 | H | 0 | 2.4600  | 4.2490  | -20.0130 | H | 0 | -11.3280 | 13.7050 | -25.5360 | H | 0 |
| 12.2640 | -6.6960 | -11.8360 | C | 0 | 4.1420  | 3.6220  | -21.1060 | C | 0 | -10.0230 | 11.8430 | -26.8860 | O | 0 |
| 12.4790 | -7.7690 | -12.4330 | O | 0 | 4.3520  | 2.7600  | -20.4910 | H | 0 | -9.4990  | 11.0390 | -26.9120 | H | 0 |
| 11.5220 | -5.6770 | -12.3000 | N | 0 | 5.9480  | 3.0160  | -24.9470 | C | 0 | -10.9560 | 10.7280 | -23.3630 | C | 0 |
| 11.3770 | -4.8110 | -11.8000 | H | 0 | 6.9070  | 3.7380  | -25.3230 | O | 0 | -11.2740 | 9.5360  | -23.1460 | O | 0 |
| 11.0700 | -5.6520 | -13.8120 | C | 0 | 4.8060  | 2.9560  | -25.6460 | N | 0 | -11.1170 | 11.6880 | -22.4970 | N | 0 |
| 11.6720 | -6.3510 | -14.3920 | H | 0 | 4.2270  | 2.1910  | -25.3300 | H | 0 | -10.7140 | 12.6070 | -22.6180 | H | 0 |
| 9.6420  | -6.1850 | -13.9660 | C | 0 | 4.3060  | 3.7530  | -26.7100 | C | 0 | -11.9230 | 11.5540 | -21.2670 | C | 0 |
| 8.8770  | -5.6180 | -13.4350 | H | 0 | 5.1050  | 4.4460  | -26.9710 | H | 0 | -11.6270 | 10.6300 | -20.7700 | H | 0 |
| 9.4110  | -6.0010 | -15.0150 | H | 0 | 3.9450  | 2.8380  | -27.8390 | C | 0 | -11.7750 | 12.7140 | -20.2410 | C | 0 |
| 9.5580  | -7.7120 | -13.6270 | C | 0 | 4.7890  | 2.1550  | -27.9330 | H | 0 | -10.7310 | 12.9320 | -20.0160 | H | 0 |
| 8.7260  | -8.1190 | -14.2020 | H | 0 | 3.1520  | 2.1900  | -27.4670 | H | 0 | -12.1420 | 13.6100 | -20.7400 | H | 0 |
| 10.4440 | -8.3030 | -13.8610 | H | 0 | 3.5460  | 3.5650  | -29.1030 | C | 0 | -12.5480 | 12.4730 | -18.9120 | C | 0 |
| 9.0680  | -8.2130 | -11.8910 | S | 0 | 2.9240  | 4.4310  | -28.8750 | H | 0 | -12.0240 | 11.5970 | -17.9020 | C | 0 |

|          |         |          |   |   |         |         |          |   |   |         |          |          |   |   |
|----------|---------|----------|---|---|---------|---------|----------|---|---|---------|----------|----------|---|---|
| -11.1400 | 11.0230 | -18.1390 | H | 0 | -8.3690 | 11.1050 | -20.8010 | C | 0 | 4.6650  | -5.2750  | -22.6170 | H | 0 |
| -12.7440 | 11.3350 | -16.7470 | C | 0 | -8.4620 | 11.3400 | -21.8510 | H | 0 | 6.1670  | -4.9630  | -24.2490 | C | 0 |
| -12.2600 | 10.6020 | -16.1180 | H | 0 | -7.8720 | 11.9800 | -19.7820 | C | 0 | 5.4250  | -4.7790  | -25.0260 | H | 0 |
| -13.9210 | 12.0550 | -16.4870 | C | 0 | -7.5150 | 13.2660 | -20.1080 | O | 0 | 6.9760  | -4.2540  | -24.4290 | H | 0 |
| -14.5440 | 11.7860 | -15.3430 | O | 0 | -7.5580 | 13.4200 | -21.0550 | H | 0 | 6.6150  | -6.3880  | -24.3610 | C | 0 |
| -14.2210 | 10.9860 | -14.9210 | H | 0 | -7.7860 | 11.5300 | -18.4640 | C | 0 | 7.1270  | -6.6900  | -23.4470 | H | 0 |
| -14.4750 | 12.9170 | -17.4810 | C | 0 | -7.3100 | 12.2040 | -17.7680 | H | 0 | 5.4520  | -7.2580  | -24.7180 | C | 0 |
| -15.4240 | 13.3740 | -17.2420 | H | 0 | -8.2140 | 10.2580 | -18.1420 | C | 0 | 4.8450  | -6.9690  | -25.5750 | H | 0 |
| -13.7480 | 13.1800 | -18.6470 | C | 0 | -8.2840 | 9.9210  | -17.1180 | H | 0 | 5.7630  | -8.2780  | -24.9430 | H | 0 |
| -14.2900 | 13.7700 | -19.3720 | H | 0 | -6.9410 | 6.5070  | -19.4160 | C | 0 | 4.6850  | -7.3190  | -23.9450 | H | 0 |
| -13.3850 | 11.4210 | -21.5470 | C | 0 | -6.2640 | 7.3500  | -18.7910 | O | 0 | 7.6240  | -6.6180  | -25.4670 | C | 0 |
| -14.0570 | 12.1970 | -22.1460 | O | 0 | -6.4240 | 5.3790  | -20.0250 | N | 0 | 7.2150  | -6.1910  | -26.3830 | H | 0 |
| -13.9430 | 10.3750 | -21.0240 | N | 0 | -7.0450 | 4.8470  | -20.6170 | H | 0 | 8.6060  | -6.2020  | -25.2440 | H | 0 |
| -13.2770 | 9.6940  | -20.6870 | H | 0 | -5.0680 | 4.9860  | -19.6950 | C | 0 | 7.7840  | -7.6820  | -25.6410 | H | 0 |
| -15.3920 | 10.0550 | -20.8910 | C | 0 | -4.7770 | 5.1480  | -18.6570 | H | 0 | 6.5140  | -4.6420  | -21.7750 | C | 0 |
| -15.9100 | 11.0140 | -20.8810 | H | 0 | -4.8620 | 3.5250  | -19.9970 | C | 0 | 7.4470  | -3.8670  | -21.7470 | O | 0 |
| -15.8270 | 9.2370  | -22.1620 | C | 0 | -5.2090 | 3.2910  | -21.0040 | H | 0 | 6.2950  | -5.5810  | -20.7960 | N | 0 |
| -15.1680 | 8.3800  | -22.2990 | H | 0 | -3.4140 | 3.0050  | -19.8030 | C | 0 | 5.4940  | -6.1940  | -20.8190 | H | 0 |
| -17.3560 | 8.8530  | -22.2220 | C | 0 | -3.4970 | 1.9230  | -19.7070 | H | 0 | 7.2480  | -5.7120  | -19.6600 | C | 0 |
| -17.9250 | 9.7830  | -22.1980 | H | 0 | -2.6910 | 3.3040  | -20.5620 | H | 0 | 7.9130  | -4.8520  | -19.5870 | H | 0 |
| -17.4510 | 8.2290  | -23.1110 | H | 0 | -3.0480 | 3.3780  | -18.8460 | H | 0 | 6.5460  | -5.7700  | -18.2770 | C | 0 |
| -17.6390 | 8.1890  | -21.4060 | H | 0 | -5.9180 | 2.7450  | -19.2370 | C | 0 | 6.0730  | -6.7450  | -18.1620 | H | 0 |
| -15.6520 | 10.0910 | -23.2250 | O | 0 | -6.8880 | 2.8970  | -19.7090 | H | 0 | 7.2670  | -5.6800  | -17.4640 | H | 0 |
| -14.9430 | 10.7000 | -23.0070 | H | 0 | -5.7280 | 1.6800  | -19.3660 | H | 0 | 5.6170  | -4.5880  | -18.0470 | C | 0 |
| -15.6370 | 9.3000  | -19.6260 | C | 0 | -5.9980 | 3.0280  | -18.1880 | H | 0 | 6.3050  | -3.7450  | -17.9770 | H | 0 |
| -14.8370 | 8.4340  | -19.2830 | O | 0 | -4.0990 | 5.8600  | -20.5030 | C | 0 | 4.9590  | -4.4870  | -18.9110 | H | 0 |
| -16.5930 | 9.6840  | -18.8000 | N | 0 | -3.3340 | 6.6460  | -20.0310 | O | 0 | 4.5850  | -4.7220  | -16.5710 | S | 0 |
| -17.1420 | 10.4720 | -19.1150 | H | 0 | -4.1050 | 5.6230  | -21.8130 | N | 0 | 3.4440  | -3.3640  | -17.0670 | C | 0 |
| -16.9310 | 9.0160  | -17.5510 | C | 0 | -4.8110 | 4.9480  | -22.0700 | H | 0 | 2.5070  | -3.8760  | -17.2880 | H | 0 |
| -16.0940 | 8.9460  | -16.8550 | H | 0 | -3.1930 | 6.2180  | -22.8260 | C | 0 | 3.3710  | -2.7000  | -16.2060 | H | 0 |
| -18.0290 | 9.8900  | -16.8320 | C | 0 | -3.7240 | 6.2250  | -23.7770 | H | 0 | 3.8550  | -2.7610  | -17.8770 | H | 0 |
| -18.3030 | 9.5800  | -15.8230 | H | 0 | -2.8840 | 7.2150  | -22.5090 | H | 0 | 8.1200  | -6.9980  | -19.7380 | C | 0 |
| -17.5760 | 10.8750 | -16.7110 | H | 0 | -1.8700 | 5.4550  | -23.0910 | C | 0 | 7.8240  | -8.0440  | -20.3270 | O | 0 |
| -19.0140 | 9.9050  | -17.2980 | H | 0 | -0.8480 | 6.0770  | -23.3810 | O | 0 | 9.2190  | -6.9310  | -19.0450 | N | 0 |
| -17.4380 | 7.5260  | -17.7280 | C | 0 | -1.9570 | 4.1160  | -23.1130 | N | 0 | 9.4930  | -6.0500  | -18.6350 | H | 0 |
| -17.9640 | 7.0500  | -18.7910 | O | 0 | -2.8510 | 3.6950  | -22.9040 | H | 0 | 10.1500 | -8.0720  | -18.8810 | C | 0 |
| -17.1020 | 6.7560  | -16.6970 | N | 0 | -0.6970 | 3.4010  | -23.2640 | C | 0 | 9.7090  | -9.0670  | -18.9380 | H | 0 |
| -16.5280 | 7.1800  | -15.9820 | H | 0 | -0.0780 | 4.0510  | -23.8820 | H | 0 | 11.1520 | -8.0920  | -20.1770 | C | 0 |
| -17.3300 | 5.2910  | -16.6290 | C | 0 | 0.0190  | 3.2980  | -21.9420 | C | 0 | 12.0500 | -8.6330  | -19.8790 | H | 0 |
| -17.0830 | 4.9810  | -15.6140 | H | 0 | -0.3900 | 2.4050  | -21.4700 | H | 0 | 10.6080 | -8.4900  | -21.0330 | H | 0 |
| -18.3890 | 5.1510  | -16.8470 | H | 0 | 1.0960  | 3.1650  | -22.0460 | H | 0 | 11.4960 | -6.7130  | -20.7350 | C | 0 |
| -16.4900 | 4.4160  | -17.6440 | C | 0 | -0.0900 | 4.1490  | -21.2690 | H | 0 | 12.5390 | -5.8930  | -20.2670 | C | 0 |
| -16.8390 | 3.2200  | -17.8780 | O | 0 | -0.6590 | 2.0730  | -23.8710 | C | 0 | 13.2430 | -6.4580  | -19.6740 | H | 0 |
| -15.4680 | 4.9110  | -18.2690 | N | 0 | -1.4930 | 1.2080  | -23.6650 | O | 0 | 12.7500 | -4.6450  | -20.6750 | C | 0 |
| -15.1160 | 5.8050  | -17.9590 | H | 0 | 0.4800  | 1.7770  | -24.5360 | N | 0 | 13.6800 | -4.1670  | -20.4050 | H | 0 |
| -14.6750 | 4.2730  | -19.3810 | C | 0 | 1.1110  | 2.5380  | -24.7410 | H | 0 | 11.8520 | -3.9890  | -21.6630 | C | 0 |
| -14.7970 | 3.1920  | -19.3170 | H | 0 | 0.8100  | 0.4380  | -25.0750 | C | 0 | 12.1220 | -2.7940  | -22.2220 | O | 0 |
| -15.3310 | 4.8370  | -20.6840 | C | 0 | 0.1510  | -0.3330 | -24.6770 | H | 0 | 11.4210 | -2.6010  | -22.8490 | H | 0 |
| -14.7160 | 4.4860  | -21.5130 | H | 0 | 0.6570  | 0.4860  | -26.6580 | C | 0 | 10.8590 | -4.8270  | -22.1250 | C | 0 |
| -16.3990 | 4.6330  | -20.7590 | H | 0 | -0.3790 | 0.7020  | -26.9170 | H | 0 | 10.1780 | -4.4190  | -22.8570 | H | 0 |
| -15.3740 | 5.9260  | -20.6600 | H | 0 | 1.3840  | 1.2070  | -27.0330 | H | 0 | 10.6810 | -6.1590  | -21.7300 | C | 0 |
| -13.1360 | 4.5190  | -19.1580 | C | 0 | 1.1060  | -0.8860 | -27.2880 | C | 0 | 9.8470  | -6.7000  | -22.1530 | H | 0 |
| -12.7880 | 5.7000  | -18.8520 | O | 0 | 1.0930  | -1.9040 | -26.6430 | O | 0 | 10.9010 | -7.9560  | -17.4840 | C | 0 |
| -12.2030 | 3.5490  | -19.2940 | N | 0 | 1.5370  | -0.9100 | -28.5700 | N | 0 | 10.5850 | -7.0900  | -16.7070 | O | 0 |
| -12.4290 | 2.1690  | -19.8050 | C | 0 | 2.0750  | -1.6730 | -28.9570 | H | 0 | 11.8030 | -8.9420  | -17.2720 | N | 0 |
| -13.2350 | 2.0780  | -20.5330 | H | 0 | 1.6870  | -0.0140 | -29.0110 | H | 0 | 12.0040 | -9.6460  | -17.9670 | H | 0 |
| -12.6620 | 1.5440  | -18.9430 | H | 0 | 2.2210  | 0.1470  | -24.5910 | C | 0 | 12.7140 | -8.8980  | -16.0650 | C | 0 |
| -11.0350 | 1.6780  | -20.2900 | C | 0 | 3.1950  | 0.8680  | -24.8020 | O | 0 | 11.9820 | -9.0150  | -15.2660 | H | 0 |
| -10.8520 | 2.0700  | -21.2910 | H | 0 | 2.3160  | -1.0290 | -23.9120 | N | 0 | 13.5870 | -10.1490 | -15.9500 | C | 0 |
| -11.0460 | 0.5880  | -20.3020 | H | 0 | 1.4730  | -1.5800 | -23.8390 | H | 0 | 13.9620 | -10.1570 | -14.9270 | H | 0 |
| -10.1700 | 2.2780  | -19.2450 | C | 0 | 3.4180  | -1.4710 | -23.0720 | C | 0 | 13.0530 | -11.0970 | -16.0090 | H | 0 |
| -9.1320  | 2.4790  | -19.5110 | H | 0 | 4.3300  | -0.9280 | -23.3210 | H | 0 | 14.5670 | -10.1530 | -16.9750 | O | 0 |
| -10.2780 | 1.6090  | -18.3910 | H | 0 | 3.1350  | -1.1580 | -21.5250 | C | 0 | 15.3000 | -10.6850 | -16.6560 | H | 0 |
| -10.7910 | 3.6460  | -18.9550 | C | 0 | 2.1390  | -1.4450 | -21.1880 | H | 0 | 13.6380 | -7.5990  | -16.0710 | C | 0 |
| -10.8450 | 3.8360  | -17.8830 | H | 0 | 4.0360  | -1.7080 | -20.4810 | C | 0 | 13.6910 | -6.8030  | -17.0770 | O | 0 |
| -10.1070 | 4.7720  | -19.6890 | C | 0 | 4.0000  | -1.1520 | -19.5440 | H | 0 | 14.3180 | -7.4000  | -14.9360 | N | 0 |
| -10.3290 | 4.9360  | -20.8690 | O | 0 | 3.8560  | -2.7780 | -20.3740 | H | 0 | 14.1300 | -7.9930  | -14.1400 | H | 0 |
| -9.1250  | 5.4810  | -19.0940 | N | 0 | 5.0400  | -1.6290 | -20.8990 | H | 0 | 15.3190 | -6.3460  | -14.5790 | C | 0 |
| -9.0160  | 5.3340  | -18.1010 | H | 0 | 3.1360  | 0.3540  | -21.3670 | C | 0 | 14.8620 | -5.3580  | -14.5180 | H | 0 |
| -8.4800  | 6.6770  | -19.5690 | C | 0 | 4.0840  | 0.8330  | -21.6120 | H | 0 | 15.7340 | -6.4500  | -13.5760 | H | 0 |
| -8.7530  | 6.8220  | -20.6150 | H | 0 | 2.4750  | 0.8280  | -22.0920 | H | 0 | 16.5450 | -6.0900  | -15.5130 | C | 0 |
| -9.0540  | 7.9000  | -18.7860 | C | 0 | 2.8290  | 0.5770  | -20.3450 | H | 0 | 16.8290 | -6.7850  | -16.4960 | O | 0 |
| -10.1440 | 7.8780  | -18.8100 | H | 0 | 3.7780  | -2.9390 | -23.3180 | C | 0 | 17.0760 | -4.9090  | -15.2270 | N | 0 |
| -8.7540  | 7.7130  | -17.7550 | H | 0 | 2.9020  | -3.6920 | -23.8040 | O | 0 | 16.8070 | -4.5680  | -14.3160 | H | 0 |
| -8.5810  | 9.3200  | -19.1590 | C | 0 | 4.9610  | -3.2700 | -22.8880 | N | 0 | 18.2620 | -4.4110  | -15.9860 | C | 0 |
| -8.7300  | 9.7770  | -20.4860 | C | 0 | 5.6660  | -2.5650 | -22.7250 | H | 0 | 18.2770 | -3.3360  | -15.8020 | H | 0 |
| -8.9400  | 9.1360  | -21.3300 | H | 0 | 5.4940  | -4.6340 | -22.9160 | C | 0 | 19.5510 | -5.1530  | -15.3830 | C | 0 |



|         |          |          |   |   |         |          |          |   |   |         |         |         |   |   |
|---------|----------|----------|---|---|---------|----------|----------|---|---|---------|---------|---------|---|---|
| 19.4580 | -5.1450  | -14.2970 | H | 0 | 19.6900 | -14.7030 | -16.1840 | O | 0 | 11.4020 | -7.3310 | 4.6050  | H | 0 |
| 19.5670 | -6.1640  | -15.7890 | H | 0 | 16.7590 | -13.7450 | -12.8960 | C | 0 | 11.8980 | -8.6360 | 2.9330  | C | 0 |
| 20.8030 | -4.4230  | -15.5600 | C | 0 | 16.3000 | -14.9050 | -12.8120 | O | 0 | 11.5050 | -7.9730 | 2.1770  | H | 0 |
| 21.0020 | -3.1370  | -15.1380 | N | 0 | 16.5740 | -12.7030 | -12.1130 | N | 0 | 14.8270 | -8.9210 | 0.8610  | C | 0 |
| 22.2430 | -2.8280  | -15.6220 | C | 0 | 16.9550 | -11.7980 | -12.3460 | H | 0 | 15.8380 | -9.6420 | 0.7370  | O | 0 |
| 22.7270 | -1.8660  | -15.5400 | H | 0 | 15.5930 | -12.7660 | -11.0210 | C | 0 | 14.8470 | -7.6820 | 1.3840  | N | 0 |
| 22.6950 | -3.8800  | -16.3480 | N | 0 | 15.1520 | -13.7600 | -10.9510 | H | 0 | 14.0040 | -7.1260 | 1.4080  | H | 0 |
| 23.6290 | -3.9500  | -16.7250 | H | 0 | 16.3250 | -12.5740 | -9.6220  | C | 0 | 16.0000 | -6.8760 | 1.7450  | C | 0 |
| 21.8600 | -4.8990  | -16.2690 | C | 0 | 15.6020 | -12.7750 | -8.8320  | H | 0 | 16.7860 | -7.6190 | 1.8810  | H | 0 |
| 21.9110 | -5.9000  | -16.6700 | H | 0 | 17.0690 | -13.3610 | -9.4920  | H | 0 | 16.4480 | -5.7880 | 0.7100  | C | 0 |
| 18.2190 | -4.5010  | -17.5600 | C | 0 | 16.8430 | -11.2070 | -9.3420  | C | 0 | 17.4780 | -5.4650 | 0.8640  | H | 0 |
| 19.1030 | -5.0440  | -18.2920 | O | 0 | 18.1740 | -10.9690 | -9.7860  | C | 0 | 16.4770 | -6.4320 | -0.6570 | C | 0 |
| 17.0350 | -4.0040  | -18.0810 | N | 0 | 18.7100 | -11.7300 | -10.3330 | H | 0 | 15.4780 | -6.6440 | -1.0390 | H | 0 |
| 16.5200 | -3.4670  | -17.3980 | H | 0 | 18.7750 | -9.7270  | -9.5410  | C | 0 | 17.0890 | -5.7200 | -1.2100 | H | 0 |
| 16.5490 | -4.2260  | -19.4580 | C | 0 | 19.7930 | -9.5230  | -9.8380  | H | 0 | 16.9560 | -7.4110 | -0.6580 | H | 0 |
| 15.5420 | -3.8100  | -19.4350 | H | 0 | 18.1020 | -8.8020  | -8.6750  | C | 0 | 15.5550 | -4.5510 | 0.7290  | C | 0 |
| 17.3060 | -3.3460  | -20.5060 | C | 0 | 18.7360 | -7.6760  | -8.4700  | O | 0 | 14.5180 | -4.8800 | 0.6570  | H | 0 |
| 18.1510 | -3.8930  | -20.9240 | H | 0 | 19.2890 | -7.4610  | -9.2250  | H | 0 | 15.5240 | -4.0840 | 1.7130  | H | 0 |
| 16.5900 | -3.1490  | -21.3050 | H | 0 | 16.8090 | -9.0530  | -8.1590  | C | 0 | 15.9530 | -3.4110 | -0.2870 | C | 0 |
| 17.6880 | -1.8800  | -19.9960 | C | 0 | 16.3340 | -8.3800  | -7.4610  | H | 0 | 16.9630 | -3.0790 | -0.0490 | H | 0 |
| 16.8580 | -1.4210  | -19.4600 | H | 0 | 16.1650 | -10.2500 | -8.4790  | C | 0 | 15.6070 | -3.6950 | -1.2810 | H | 0 |
| 18.5950 | -1.9640  | -19.3970 | H | 0 | 15.1830 | -10.5370 | -8.1340  | H | 0 | 15.3160 | -2.5310 | -0.1940 | H | 0 |
| 17.9070 | -0.8480  | -21.0780 | C | 0 | 14.5390 | -11.6960 | -11.0560 | C | 0 | 15.8540 | -6.2400 | 3.1320  | C | 0 |
| 17.5810 | -1.0580  | -22.2760 | O | 0 | 14.6930 | -10.6140 | -11.5970 | O | 0 | 14.7730 | -5.9860 | 3.6370  | O | 0 |
| 18.3530 | 0.3050   | -20.8200 | O | 0 | 13.3700 | -11.9240 | -10.3170 | N | 0 | 17.0360 | -5.9620 | 3.7850  | N | 0 |
| 16.3100 | -5.6860  | -19.9380 | C | 0 | 13.3290 | -12.8140 | -9.8410  | H | 0 | 17.9110 | -6.2760 | 3.3900  | H | 0 |
| 16.7750 | -6.0490  | -20.9870 | O | 0 | 12.1080 | -11.0600 | -10.3190 | C | 0 | 17.0600 | -4.8290 | 4.7930  | C | 0 |
| 15.5920 | -6.5210  | -19.1540 | N | 0 | 12.2850 | -10.1360 | -10.8700 | H | 0 | 16.0300 | -4.6590 | 5.1080  | H | 0 |
| 15.2970 | -6.2030  | -18.2420 | H | 0 | 11.0240 | -11.9200 | -10.9170 | C | 0 | 17.7120 | -5.3450 | 6.0260  | C | 0 |
| 15.4270 | -8.0180  | -19.4610 | C | 0 | 10.7890 | -12.7890 | -10.3030 | H | 0 | 17.1270 | -6.1260 | 6.5110  | H | 0 |
| 14.7000 | -8.3400  | -18.7150 | H | 0 | 10.1310 | -11.3090 | -11.0460 | H | 0 | 18.6470 | -5.8450 | 5.7750  | H | 0 |
| 14.9660 | -8.3080  | -20.4050 | H | 0 | 11.3020 | -12.5200 | -12.2700 | C | 0 | 18.0970 | -4.0480 | 7.2380  | S | 0 |
| 16.6450 | -8.8350  | -19.2400 | C | 0 | 12.0090 | -13.7790 | -12.4030 | C | 0 | 16.9450 | -3.3750 | 7.1790  | H | 0 |
| 16.5950 | -9.9970  | -19.6460 | O | 0 | 12.3480 | -14.3200 | -11.5310 | H | 0 | 17.7500 | -3.5890 | 4.1590  | C | 0 |
| 17.7400 | -8.2550  | -18.7700 | N | 0 | 12.3590 | -14.3720 | -13.6610 | C | 0 | 18.5040 | -3.6560 | 3.1600  | O | 0 |
| 17.7410 | -7.2450  | -18.7780 | H | 0 | 12.9480 | -15.2760 | -13.6780 | H | 0 | 17.3740 | -2.4100 | 4.6780  | N | 0 |
| 19.0160 | -9.0440  | -18.6730 | C | 0 | 12.1180 | -13.5780 | -14.8350 | C | 0 | 16.6580 | -2.3730 | 5.3900  | H | 0 |
| 19.0700 | -9.8630  | -19.3900 | H | 0 | 12.6910 | -13.9180 | -16.0110 | O | 0 | 17.7980 | -1.0990 | 4.1030  | C | 0 |
| 20.2030 | -8.0820  | -19.0950 | C | 0 | 13.1850 | -14.7350 | -15.9160 | H | 0 | 18.7490 | -1.1890 | 3.5770  | H | 0 |
| 20.2570 | -7.2210  | -18.4290 | H | 0 | 11.2320 | -12.4360 | -14.7260 | C | 0 | 16.7590 | -0.4240 | 3.0850  | C | 0 |
| 21.1040 | -8.6870  | -19.0030 | H | 0 | 10.8140 | -11.9390 | -15.5890 | H | 0 | 16.3880 | -1.2140 | 2.4310  | H | 0 |
| 20.1430 | -7.6490  | -20.6240 | C | 0 | 10.8640 | -11.9260 | -13.4620 | C | 0 | 15.8740 | -0.0240 | 3.5790  | H | 0 |
| 19.3950 | -6.8690  | -20.7620 | H | 0 | 10.3850 | -10.9590 | -13.4860 | H | 0 | 17.2650 | 0.6590  | 2.1830  | C | 0 |
| 21.1270 | -7.2650  | -20.8950 | H | 0 | 11.7130 | -10.4870 | -8.9380  | C | 0 | 18.0270 | 0.3560  | 1.0200  | C | 0 |
| 19.6990 | -8.7720  | -21.5480 | C | 0 | 10.7630 | -9.6670  | -8.8370  | O | 0 | 18.1780 | -0.6620 | 0.6910  | H | 0 |
| 20.3220 | -9.6260  | -21.2830 | H | 0 | 12.4240 | -10.8900 | -7.8620  | N | 0 | 18.6210 | 1.3260  | 0.1860  | C | 0 |
| 18.6410 | -9.0260  | -21.4830 | H | 0 | 13.1110 | -11.6300 | -7.8660  | H | 0 | 19.2960 | 1.1230  | -0.6320 | H | 0 |
| 20.0270 | -8.3130  | -23.0120 | C | 0 | 12.1170 | -10.3530 | -6.5530  | C | 0 | 18.3300 | 2.6500  | 0.4480  | C | 0 |
| 19.4060 | -7.4520  | -23.2620 | H | 0 | 11.9010 | -9.2870  | -6.6220  | H | 0 | 18.6060 | 3.6230  | -0.4040 | O | 0 |
| 21.0190 | -7.8820  | -23.1450 | H | 0 | 11.1620 | -10.7420 | -6.2000  | H | 0 | 18.4480 | 3.3670  | -1.3160 | H | 0 |
| 19.8510 | -9.5180  | -23.8270 | N | 0 | 13.2720 | -10.5270 | -5.5630  | C | 0 | 17.4930 | 3.0190  | 1.5810  | C | 0 |
| 18.8680 | -9.7360  | -23.7500 | H | 0 | 14.2070 | -11.2900 | -5.8420  | O | 0 | 17.1220 | 4.0330  | 1.6090  | H | 0 |
| 20.1010 | -9.3560  | -24.7920 | H | 0 | 13.1870 | -9.6870  | -4.5890  | N | 0 | 16.9410 | 1.9880  | 2.3930  | C | 0 |
| 20.3190 | -10.3460 | -23.4860 | H | 0 | 12.4200 | -9.0310  | -4.5580  | H | 0 | 16.2620 | 2.2850  | 3.1790  | H | 0 |
| 19.2600 | -9.7490  | -17.3460 | C | 0 | 14.1020 | -9.8510  | -3.3870  | C | 0 | 17.8460 | -0.0970 | 5.3210  | C | 0 |
| 19.9830 | -10.7170 | -17.2710 | O | 0 | 14.1400 | -10.9320 | -3.2570  | H | 0 | 16.9370 | -0.0330 | 6.1980  | O | 0 |
| 18.5490 | -9.2530  | -16.3380 | N | 0 | 15.3960 | -9.1840  | -3.7240  | C | 0 | 18.8620 | 0.7660  | 5.3200  | N | 0 |
| 17.8050 | -8.6070  | -16.5600 | H | 0 | 16.2070 | -9.6700  | -3.1820  | H | 0 | 19.4660 | 0.7270  | 4.5110  | H | 0 |
| 18.5110 | -10.0220 | -15.0640 | C | 0 | 15.6770 | -9.2700  | -4.7740  | H | 0 | 19.0430 | 1.9090  | 6.2100  | C | 0 |
| 19.5730 | -10.2200 | -14.9220 | H | 0 | 15.4460 | -8.1360  | -3.4300  | H | 0 | 18.5670 | 1.8520  | 7.1890  | H | 0 |
| 17.9640 | -9.1630  | -13.8980 | C | 0 | 13.5300 | -9.2190  | -2.1450  | C | 0 | 20.5320 | 1.8740  | 6.5480  | C | 0 |
| 16.9280 | -8.8330  | -13.9760 | H | 0 | 13.1340 | -8.0310  | -2.1670  | O | 0 | 20.6800 | 0.8470  | 6.8830  | H | 0 |
| 18.1050 | -9.7880  | -13.0160 | H | 0 | 13.6800 | -9.9830  | -1.0630  | N | 0 | 21.0400 | 2.1380  | 5.6210  | H | 0 |
| 18.8110 | -8.0170  | -13.4890 | C | 0 | 14.0640 | -10.9150 | -1.1330  | H | 0 | 20.9630 | 2.7060  | 7.7330  | C | 0 |
| 20.0520 | -8.1380  | -13.5680 | O | 0 | 13.4430 | -9.4120  | 0.2740   | C | 0 | 22.1300 | 2.7000  | 8.1270  | O | 0 |
| 18.1750 | -7.0370  | -13.0550 | O | 0 | 12.8610 | -8.5210  | 0.0380   | H | 0 | 20.1270 | 3.4100  | 8.3270  | O | 0 |
| 17.8240 | -11.4050 | -15.1260 | C | 0 | 12.7460 | -10.3460 | 1.1780   | C | 0 | 18.3970 | 3.1210  | 5.5660  | C | 0 |
| 16.9030 | -11.6430 | -15.9430 | O | 0 | 11.6820 | -10.4350 | 0.9620   | H | 0 | 19.1300 | 3.8780  | 4.8480  | O | 0 |
| 18.2180 | -12.2880 | -14.1860 | N | 0 | 13.3220 | -11.2720 | 1.2040   | H | 0 | 17.1270 | 3.3700  | 5.6280  | N | 0 |
| 19.1120 | -12.0900 | -13.7590 | H | 0 | 12.5910 | -9.8140  | 2.6020   | C | 0 | 16.6530 | 2.8190  | 6.3300  | H | 0 |
| 17.7580 | -13.6050 | -14.0640 | C | 0 | 13.0810 | -10.6570 | 3.6070   | C | 0 | 16.4590 | 4.4020  | 4.9100  | C | 0 |
| 17.2000 | -13.9500 | -14.9340 | H | 0 | 13.5610 | -11.5180 | 3.1670   | H | 0 | 16.6240 | 4.3220  | 3.8270  | H | 0 |
| 18.8820 | -14.5750 | -13.9450 | C | 0 | 12.9080 | -10.3430 | 4.8700   | C | 0 | 14.9600 | 4.2230  | 5.2570  | C | 0 |
| 19.3110 | -14.5270 | -12.9440 | H | 0 | 13.4490 | -11.0420 | 5.4900   | H | 0 | 14.7000 | 3.1850  | 5.0500  | H | 0 |
| 18.5820 | -15.6110 | -14.1000 | H | 0 | 12.2420 | -9.1490  | 5.2710   | C | 0 | 14.7870 | 4.4080  | 6.3180  | H | 0 |
| 19.9650 | -14.3790 | -15.0160 | C | 0 | 12.2360 | -8.8230  | 6.3010   | H | 0 | 14.3770 | 4.9080  | 4.6430  | H | 0 |
| 20.9580 | -13.7780 | -14.7180 | O | 0 | 11.7990 | -8.2830  | 4.2850   | C | 0 | 16.9760 | 5.8960  | 5.2390  | C | 0 |

|         |         |         |   |   |         |          |         |   |   |         |          |          |   |   |
|---------|---------|---------|---|---|---------|----------|---------|---|---|---------|----------|----------|---|---|
| 17.1340 | 6.6980  | 4.3310  | O | 0 | 21.9200 | -2.1180  | -0.4230 | H | 0 | 16.6960 | -12.9940 | 0.3460   | C | 0 |
| 17.2240 | 6.1090  | 6.5380  | N | 0 | 20.5850 | -3.5530  | 0.2460  | C | 0 | 15.8340 | -12.3560 | 0.5390   | H | 0 |
| 17.0520 | 5.4090  | 7.2460  | H | 0 | 21.3000 | -4.1540  | 0.8070  | H | 0 | 16.1040 | -14.3870 | -0.0610  | C | 0 |
| 17.7440 | 7.3460  | 6.9720  | C | 0 | 19.6180 | -3.4660  | 0.7420  | H | 0 | 15.8310 | -15.0240 | 0.7810   | H | 0 |
| 17.0630 | 8.0960  | 6.5690  | H | 0 | 20.5560 | -4.2110  | -1.1750 | C | 0 | 15.1950 | -14.2260 | -0.6420  | H | 0 |
| 17.8360 | 7.3470  | 8.5390  | C | 0 | 21.5110 | -4.0660  | -1.6800 | H | 0 | 16.7720 | -14.9540 | -0.7090  | H | 0 |
| 16.8620 | 7.2370  | 9.0160  | H | 0 | 20.2370 | -5.2260  | -0.9380 | H | 0 | 17.4360 | -13.2380 | 1.6860   | C | 0 |
| 18.4670 | 6.5090  | 8.8350  | H | 0 | 19.5720 | -3.5870  | -2.0520 | N | 0 | 17.9590 | -14.1930 | 1.6300   | H | 0 |
| 18.4450 | 8.6910  | 9.0500  | C | 0 | 19.1130 | -2.6940  | -1.9420 | H | 0 | 18.1620 | -12.4620 | 1.9280   | H | 0 |
| 19.3410 | 9.0350  | 8.5320  | H | 0 | 19.0520 | -4.2190  | -3.0970 | C | 0 | 16.5070 | -13.2440 | 2.9490   | C | 0 |
| 17.3310 | 9.7310  | 8.7590  | C | 0 | 19.3710 | -5.4620  | -3.4010 | N | 0 | 15.5420 | -13.7280 | 2.7990   | H | 0 |
| 16.3720 | 9.5040  | 9.2250  | H | 0 | 20.1470 | -5.9220  | -2.9470 | H | 0 | 17.0870 | -13.7350 | 3.7300   | H | 0 |
| 17.6680 | 10.7410 | 8.9940  | H | 0 | 18.8500 | -5.9640  | -4.1060 | H | 0 | 16.3660 | -12.2160 | 3.2830   | H | 0 |
| 17.2640 | 9.8360  | 7.6760  | H | 0 | 18.1070 | -3.6670  | -3.7540 | N | 0 | 17.0180 | -12.5440 | -2.1050  | C | 0 |
| 18.6270 | 8.6570  | 10.5800 | C | 0 | 17.7640 | -2.7480  | -3.5140 | H | 0 | 15.8180 | -12.3610 | -2.2080  | O | 0 |
| 17.7100 | 8.2390  | 10.9950 | H | 0 | 17.8840 | -4.1650  | -4.6040 | H | 0 | 17.7920 | -12.8140 | -3.1390  | N | 0 |
| 19.3700 | 7.9020  | 10.8380 | H | 0 | 21.9060 | -2.1170  | 2.5230  | C | 0 | 18.7670 | -12.8480 | -2.8750  | H | 0 |
| 19.0800 | 9.5750  | 10.9540 | H | 0 | 23.0750 | -1.8540  | 2.7040  | O | 0 | 17.3170 | -12.8630 | -4.5340  | C | 0 |
| 19.0910 | 7.5300  | 6.3070  | C | 0 | 21.2430 | -3.0560  | 3.2420  | N | 0 | 16.7250 | -11.9880 | -4.8030  | H | 0 |
| 19.3240 | 8.6770  | 5.9240  | O | 0 | 20.2610 | -3.2190  | 3.0720  | H | 0 | 18.5020 | -13.0750 | -5.4850  | C | 0 |
| 19.9790 | 6.5470  | 6.0790  | N | 0 | 21.9450 | -3.8200  | 4.2400  | C | 0 | 18.9680 | -13.9770 | -5.0880  | H | 0 |
| 19.7950 | 5.6700  | 6.5440  | H | 0 | 22.9950 | -3.5310  | 4.2990  | H | 0 | 18.2910 | -13.2930 | -6.5320  | H | 0 |
| 21.2780 | 6.7060  | 5.4720  | C | 0 | 21.3480 | -3.5560  | 5.6250  | C | 0 | 19.4620 | -11.9440 | -5.7110  | C | 0 |
| 21.5090 | 7.7520  | 5.6720  | H | 0 | 20.3400 | -3.9580  | 5.5140  | H | 0 | 20.5620 | -11.9780 | -6.5600  | N | 0 |
| 22.2580 | 5.7540  | 6.1050  | C | 0 | 22.0580 | -4.2080  | 6.8860  | C | 0 | 21.1080 | -10.7720 | -6.5300  | C | 0 |
| 21.8040 | 4.7630  | 6.1200  | H | 0 | 23.0590 | -3.8280  | 7.0910  | H | 0 | 22.0180 | -10.4290 | -7.0000  | H | 0 |
| 23.1460 | 5.6840  | 5.4780  | H | 0 | 21.4410 | -3.9270  | 7.7400  | H | 0 | 20.3670 | -9.9640  | -5.7400  | N | 0 |
| 22.6320 | 6.2750  | 7.5500  | C | 0 | 22.0200 | -5.2920  | 6.7820  | H | 0 | 20.4200 | -8.9600  | -5.6450  | H | 0 |
| 22.8310 | 7.3380  | 7.4180  | H | 0 | 21.2080 | -2.0320  | 5.9020  | C | 0 | 19.3940 | -10.6450 | -5.1880  | C | 0 |
| 21.7610 | 6.0450  | 8.1630  | H | 0 | 22.1890 | -1.5710  | 5.7840  | H | 0 | 18.5680 | -10.1940 | -4.6570  | H | 0 |
| 23.9790 | 5.5570  | 7.9670  | C | 0 | 20.6030 | -1.4660  | 5.1940  | H | 0 | 16.3160 | -14.0300 | -4.6650  | C | 0 |
| 24.0790 | 4.5760  | 7.5020  | H | 0 | 20.7920 | -1.7380  | 6.8650  | H | 0 | 16.6630 | -15.1920 | -4.2620  | O | 0 |
| 24.8320 | 6.1010  | 7.5600  | H | 0 | 22.1990 | -5.3440  | 3.9440  | C | 0 | 15.0810 | -13.7940 | -5.0860  | N | 0 |
| 24.2300 | 5.3920  | 9.4520  | C | 0 | 23.3010 | -5.8620  | 4.0620  | O | 0 | 14.8520 | -12.8330 | -5.2980  | H | 0 |
| 25.2480 | 5.0120  | 9.5460  | H | 0 | 21.2570 | -6.0460  | 3.3640  | N | 0 | 14.0540 | -14.7700 | -5.3700  | C | 0 |
| 24.1830 | 6.3230  | 10.0160 | H | 0 | 20.3090 | -5.6980  | 3.3760  | H | 0 | 14.3000 | -15.7270 | -4.9110  | H | 0 |
| 23.1420 | 4.5030  | 10.0140 | N | 0 | 21.3910 | -7.3450  | 2.6940  | C | 0 | 12.7900 | -14.1650 | -4.8320  | C | 0 |
| 22.8470 | 3.8280  | 9.3240  | H | 0 | 22.2810 | -7.2550  | 2.0710  | H | 0 | 12.6180 | -13.2390 | -5.3810  | H | 0 |
| 23.5370 | 3.8920  | 10.7150 | H | 0 | 21.6670 | -8.4820  | 3.7390  | C | 0 | 12.0500 | -14.9160 | -5.1080  | H | 0 |
| 22.4530 | 5.1690  | 10.3320 | H | 0 | 21.5190 | -9.4300  | 3.2220  | H | 0 | 12.4500 | -13.7800 | -3.3520  | C | 0 |
| 21.3660 | 6.5750  | 3.9240  | C | 0 | 22.7060 | -8.4080  | 4.0600  | H | 0 | 13.0720 | -12.9530 | -3.0100  | H | 0 |
| 22.3730 | 6.9890  | 3.4060  | O | 0 | 20.6390 | -8.5300  | 4.8890  | C | 0 | 11.4140 | -13.4430 | -3.3500  | H | 0 |
| 20.3320 | 6.0410  | 3.3840  | N | 0 | 20.9020 | -8.1900  | 6.1860  | C | 0 | 12.4270 | -15.0100 | -2.4870  | C | 0 |
| 19.6200 | 5.6030  | 3.9520  | H | 0 | 21.8740 | -7.8790  | 6.5380  | H | 0 | 13.1090 | -16.0350 | -2.7340  | O | 0 |
| 20.1930 | 5.7300  | 1.8920  | C | 0 | 19.7730 | -8.2920  | 6.9560  | N | 0 | 11.5720 | -15.1100 | -1.5810  | O | 0 |
| 19.1980 | 5.3250  | 1.7090  | H | 0 | 19.8170 | -8.0120  | 7.9250  | H | 0 | 13.8370 | -14.9750 | -6.8950  | C | 0 |
| 20.2610 | 6.6860  | 1.3720  | H | 0 | 18.7210 | -8.6360  | 6.2330  | C | 0 | 13.8830 | -14.0850 | -7.7710  | O | 0 |
| 21.2020 | 4.7250  | 1.5050  | C | 0 | 17.3290 | -8.7310  | 6.5330  | C | 0 | 13.2860 | -16.1730 | -7.2210  | N | 0 |
| 22.1250 | 4.9120  | 0.6850  | O | 0 | 17.0220 | -8.5440  | 7.5520  | H | 0 | 13.2630 | -16.8490 | -6.4720  | H | 0 |
| 21.0660 | 3.5630  | 2.1440  | N | 0 | 16.5010 | -9.2310  | 5.5520  | C | 0 | 12.7230 | -16.6510 | -5.8210  | C | 0 |
| 20.3650 | 3.5610  | 2.8710  | H | 0 | 15.4310 | -9.2990  | 5.6840  | H | 0 | 13.4100 | -16.4400 | -9.3400  | H | 0 |
| 21.9650 | 2.4400  | 1.9250  | C | 0 | 17.0250 | -9.6880  | 4.3100  | C | 0 | 12.6360 | -18.1970 | -8.4560  | C | 0 |
| 22.3330 | 2.3760  | 0.9010  | H | 0 | 16.2660 | -10.0460 | 3.6300  | H | 0 | 12.0090 | -18.4350 | -7.5970  | H | 0 |
| 23.0880 | 2.5030  | 2.9660  | C | 0 | 18.3990 | -9.5090  | 4.0010  | C | 0 | 12.2480 | -18.6070 | -9.3890  | H | 0 |
| 22.7200 | 2.8540  | 3.9300  | H | 0 | 18.6500 | -9.8210  | 2.9990  | H | 0 | 13.9170 | -18.8500 | -8.1690  | C | 0 |
| 23.4910 | 1.5000  | 3.1090  | H | 0 | 19.2890 | -8.9560  | 4.9550  | C | 0 | 15.0330 | -18.6910 | -9.0180  | N | 0 |
| 24.2860 | 3.2590  | 2.4380  | C | 0 | 20.2190 | -7.5740  | 1.7850  | C | 0 | 16.0730 | -18.9960 | -8.1850  | C | 0 |
| 24.6510 | 2.6300  | 1.6260  | H | 0 | 19.2050 | -6.8450  | 1.8960  | O | 0 | 17.1150 | -18.8620 | -8.4330  | H | 0 |
| 23.9130 | 4.1930  | 2.0180  | H | 0 | 20.2980 | -8.5980  | 0.8990  | N | 0 | 15.6500 | -19.3900 | -6.9340  | N | 0 |
| 25.3410 | 3.5870  | 3.4710  | C | 0 | 21.0510 | -9.2660  | 0.8250  | H | 0 | 16.2340 | -19.7270 | -6.1820  | H | 0 |
| 24.8680 | 3.9300  | 4.3910  | H | 0 | 19.1920 | -9.0190  | 0.0470  | C | 0 | 14.2680 | -19.1820 | -6.9400  | C | 0 |
| 25.9830 | 2.7380  | 3.7060  | H | 0 | 18.2510 | -8.6080  | 0.4150  | H | 0 | 13.7190 | -19.2950 | -6.0170  | H | 0 |
| 26.3910 | 4.6470  | 3.1340  | C | 0 | 19.4240 | -8.3810  | -1.3400 | C | 0 | 11.4020 | -16.0300 | -8.8440  | C | 0 |
| 26.9040 | 4.2830  | 2.2440  | H | 0 | 18.5380 | -8.6430  | -1.9190 | H | 0 | 10.8780 | -16.1560 | -9.9490  | O | 0 |
| 25.9790 | 5.6130  | 2.8420  | H | 0 | 19.4220 | -7.2990  | -1.2100 | H | 0 | 10.7660 | -15.3790 | -7.8750  | N | 0 |
| 27.5380 | 4.7610  | 4.1260  | N | 0 | 20.5360 | -8.7530  | -2.3910 | C | 0 | 11.1190 | -15.3330 | -6.9290  | H | 0 |
| 28.2990 | 5.2820  | 3.7150  | H | 0 | 20.5670 | -9.8360  | -2.2750 | H | 0 | 9.3560  | -14.9100 | -7.9820  | C | 0 |
| 27.2900 | 5.1970  | 5.0030  | H | 0 | 20.1540 | -8.5810  | -3.3970 | H | 0 | 9.2740  | -14.6350 | -9.0340  | H | 0 |
| 27.8670 | 3.8290  | 4.3370  | H | 0 | 21.7800 | -7.9330  | -2.0750 | C | 0 | 8.3780  | -16.0850 | -7.6760  | C | 0 |
| 21.3540 | 1.0510  | 2.1350  | C | 0 | 22.8090 | -8.4260  | -1.5840 | O | 0 | 8.5260  | -16.3020 | -6.6180  | H | 0 |
| 20.7570 | 0.7790  | 3.1300  | O | 0 | 21.8180 | -6.7010  | -2.4080 | O | 0 | 7.3430  | -15.8370 | -7.9110  | H | 0 |
| 21.5580 | 0.0820  | 1.1700  | N | 0 | 19.1200 | -10.5400 | 0.0100  | C | 0 | 8.5760  | -17.3110 | -8.5340  | C | 0 |
| 22.2050 | 0.3110  | 0.4290  | H | 0 | 20.0820 | -11.2120 | 0.3470  | O | 0 | 8.1460  | -17.1410 | -9.8850  | C | 0 |
| 21.1080 | -1.3610 | 1.4060  | C | 0 | 17.9760 | -11.0580 | -0.4070 | N | 0 | 7.7010  | -16.2220 | -10.2380 | H | 0 |
| 20.0820 | -1.2900 | 1.7650  | H | 0 | 17.1620 | -10.4600 | -0.4040 | H | 0 | 8.2050  | -18.2290 | -10.7620 | C | 0 |
| 20.9900 | -2.0920 | 0.1450  | C | 0 | 17.6300 | -12.4400 | -0.7120 | C | 0 | 7.9950  | -18.0730 | -11.8100 | H | 0 |
| 20.3300 | -1.5210 | -0.5090 | H | 0 | 18.5310 | -13.0520 | -0.7580 | H | 0 | 8.6290  | -19.5310 | -10.3320 | C | 0 |

|         |          |          |   |   |         |          |         |   |   |         |          |         |   |   |
|---------|----------|----------|---|---|---------|----------|---------|---|---|---------|----------|---------|---|---|
| 8.6610  | -20.2710 | -11.1180 | H | 0 | 4.9440  | -7.9330  | 4.5460  | C | 0 | 13.8070 | -12.2580 | 17.6380 | C | 0 |
| 8.8850  | -19.6960 | -8.9550  | C | 0 | 4.2510  | -8.6690  | 5.2230  | O | 0 | 14.2990 | -13.2830 | 17.1800 | O | 0 |
| 9.2510  | -20.5950 | -8.4820  | H | 0 | 6.2730  | -7.8840  | 4.7750  | N | 0 | 14.1040 | -11.0980 | 17.0790 | N | 0 |
| 8.9080  | -18.5460 | -8.0470  | C | 0 | 7.2350  | -6.9430  | 4.1130  | C | 0 | 13.6450 | -10.3090 | 17.5110 | H | 0 |
| 9.1010  | -18.5990 | -6.9860  | H | 0 | 6.9380  | -5.8960  | 4.0430  | H | 0 | 15.1130 | -10.8940 | 16.0230 | C | 0 |
| 9.0800  | -13.5750 | -7.2100  | C | 0 | 7.5710  | -7.3000  | 3.1390  | H | 0 | 15.3190 | -9.8350  | 15.8670 | H | 0 |
| 9.6940  | -13.4050 | -6.1500  | O | 0 | 8.3690  | -6.9550  | 5.0950  | C | 0 | 16.0390 | -11.3960 | 16.3030 | H | 0 |
| 8.1800  | -12.7760 | -7.6620  | N | 0 | 8.0710  | -6.2840  | 5.9010  | H | 0 | 14.7420 | -11.6160 | 14.6830 | C | 0 |
| 7.4020  | -12.8670 | -8.9830  | C | 0 | 9.3090  | -6.6640  | 4.6270  | H | 0 | 15.6570 | -11.8010 | 13.9060 | O | 0 |
| 6.6070  | -13.6090 | -8.9120  | H | 0 | 8.4670  | -8.3950  | 5.6730  | C | 0 | 13.4710 | -11.9450 | 14.5090 | N | 0 |
| 7.9290  | -13.1810 | -9.8840  | H | 0 | 9.0360  | -8.4550  | 6.6010  | H | 0 | 12.8870 | -11.7330 | 15.3060 | H | 0 |
| 6.8560  | -11.4340 | -9.1500  | C | 0 | 8.9250  | -8.9820  | 4.8770  | H | 0 | 12.9610 | -12.7280 | 13.3800 | C | 0 |
| 5.8500  | -11.4070 | -9.5690  | H | 0 | 6.9500  | -8.6550  | 5.8580  | C | 0 | 13.8250 | -12.9230 | 12.7440 | H | 0 |
| 7.5350  | -10.7840 | -9.7020  | H | 0 | 6.6660  | -9.7070  | 5.8190  | H | 0 | 12.3350 | -14.0510 | 13.9830 | C | 0 |
| 6.7620  | -10.8230 | -7.7960  | C | 0 | 6.4940  | -8.0960  | 7.2520  | C | 0 | 13.0620 | -14.4760 | 14.6750 | H | 0 |
| 5.7920  | -10.8850 | -7.3030  | H | 0 | 6.3190  | -6.8860  | 7.4880  | O | 0 | 11.5540 | -13.8360 | 14.7130 | H | 0 |
| 6.9030  | -9.7440  | -7.8700  | H | 0 | 6.4640  | -9.0330  | 8.1850  | N | 0 | 11.7730 | -15.0990 | 12.9960 | C | 0 |
| 7.8570  | -11.4990 | -6.9280  | C | 0 | 6.6830  | -9.9670  | 7.8690  | H | 0 | 11.1620 | -14.5740 | 12.2610 | H | 0 |
| 8.7310  | -10.8500 | -6.9830  | H | 0 | 6.1320  | -8.8520  | 9.5820  | C | 0 | 12.8180 | -15.9160 | 12.2510 | C | 0 |
| 7.4240  | -11.4840 | -5.4680  | C | 0 | 5.8740  | -7.8030  | 9.7280  | H | 0 | 12.5280 | -16.8360 | 11.7440 | H | 0 |
| 6.5970  | -12.2730 | -5.0490  | O | 0 | 4.8780  | -9.6690  | 10.0540 | C | 0 | 13.2470 | -15.2270 | 11.5230 | H | 0 |
| 7.8670  | -10.6630 | -4.6070  | N | 0 | 4.0580  | -9.2030  | 9.5080  | H | 0 | 13.6410 | -16.1870 | 12.9120 | H | 0 |
| 8.3410  | -9.8640  | -5.0050  | H | 0 | 4.8590  | -11.1670 | 9.7630  | C | 0 | 10.7640 | -16.1290 | 13.6610 | C | 0 |
| 7.5980  | -10.5810 | -3.1910  | C | 0 | 3.9030  | -11.5980 | 10.0570 | H | 0 | 10.1100 | -15.5190 | 14.2840 | H | 0 |
| 7.4310  | -11.5900 | -2.8130  | H | 0 | 5.0280  | -11.4360 | 8.7200  | H | 0 | 10.1910 | -16.6830 | 12.9170 | H | 0 |
| 8.8470  | -10.0410 | -2.4640  | C | 0 | 5.6030  | -11.6310 | 10.4110 | H | 0 | 11.2300 | -16.8620 | 14.3190 | H | 0 |
| 8.8170  | -8.9660  | -2.6400  | H | 0 | 4.7160  | -9.5310  | 11.5180 | C | 0 | 11.9680 | -11.8630 | 12.5330 | C | 0 |
| 8.9350  | -10.4000 | -0.9870  | C | 0 | 5.5350  | -9.9890  | 12.0730 | H | 0 | 11.1910 | -11.0530 | 13.1090 | O | 0 |
| 8.0550  | -9.9500  | -0.5270  | H | 0 | 4.8080  | -8.4820  | 11.7970 | H | 0 | 11.9280 | -12.0690 | 11.1780 | N | 0 |
| 8.7980  | -11.4670 | -0.8100  | H | 0 | 3.7890  | -9.9610  | 11.8990 | H | 0 | 12.6400 | -12.6490 | 10.7570 | H | 0 |
| 9.8030  | -10.0050 | -0.4600  | H | 0 | 7.3330  | -9.1860  | 10.5070 | C | 0 | 10.8630 | -11.6470 | 10.3600 | C | 0 |
| 10.1670 | -10.5220 | -2.9440  | C | 0 | 8.0240  | -10.1610 | 10.2860 | O | 0 | 10.0790 | -11.3980 | 11.0750 | H | 0 |
| 11.0320 | -10.0410 | -2.4860  | H | 0 | 7.7090  | -8.3240  | 11.5060 | N | 0 | 11.3570 | -10.3920 | 9.5460  | C | 0 |
| 10.3030 | -11.5730 | -2.6910  | H | 0 | 7.1360  | -7.4910  | 11.5000 | H | 0 | 10.5410 | -9.9990  | 8.9390  | H | 0 |
| 10.3830 | -10.3030 | -3.9900  | H | 0 | 9.0420  | -8.2720  | 12.1390 | C | 0 | 11.6800 | -9.5850  | 10.2030 | H | 0 |
| 6.3660  | -9.7910  | -2.7860  | C | 0 | 9.6990  | -9.1150  | 11.9270 | H | 0 | 12.1250 | -10.6540 | 8.8180  | H | 0 |
| 6.4060  | -8.7380  | -2.2060  | O | 0 | 9.8120  | -6.9710  | 11.7670 | C | 0 | 10.2990 | -12.8040 | 9.5300  | C | 0 |
| 5.2470  | -10.2460 | -3.2800  | N | 0 | 9.2880  | -6.0940  | 12.1460 | H | 0 | 11.0530 | -13.7120 | 9.0550  | O | 0 |
| 5.3350  | -11.0550 | -3.8780  | H | 0 | 11.1980 | -6.8160  | 12.4500 | C | 0 | 8.9770  | -12.8140 | 9.3340  | N | 0 |
| 3.9620  | -9.4920  | -3.3240  | C | 0 | 11.1050 | -6.7440  | 13.5340 | H | 0 | 8.4350  | -12.0490 | 9.7090  | H | 0 |
| 4.3120  | -8.4800  | -3.5270  | H | 0 | 11.7900 | -7.6890  | 12.1750 | H | 0 | 8.2370  | -13.6030 | 8.2830  | C | 0 |
| 3.0760  | -9.8930  | -4.4330  | C | 0 | 11.6190 | -5.8320  | 12.2470 | H | 0 | 8.8920  | -14.4160 | 7.9720  | H | 0 |
| 3.7090  | -10.4610 | -5.1150  | H | 0 | 9.9480  | -6.8590  | 10.2010 | C | 0 | 6.9620  | -14.3290 | 8.8070  | C | 0 |
| 2.3660  | -10.6030 | -4.0090  | H | 0 | 10.3890 | -5.8810  | 10.0110 | H | 0 | 6.2600  | -13.5390 | 9.0750  | H | 0 |
| 2.4110  | -8.8230  | -5.2710  | C | 0 | 10.5820 | -7.6190  | 9.7460  | H | 0 | 6.5530  | -14.8150 | 7.9210  | H | 0 |
| 1.2290  | -8.3730  | -5.0730  | C | 0 | 9.0240  | -6.8190  | 9.6240  | H | 0 | 7.0690  | -15.3030 | 9.9010  | C | 0 |
| 0.6060  | -8.7800  | -4.2900  | H | 0 | 8.8220  | -8.3480  | 13.6310 | C | 0 | 7.2830  | -14.8170 | 11.1950 | C | 0 |
| 0.8930  | -7.3110  | -5.9310  | N | 0 | 7.9960  | -7.7270  | 14.1840 | O | 0 | 7.3540  | -13.7560 | 11.3860 | H | 0 |
| -0.0000 | -6.8400  | -5.9280  | H | 0 | 9.6380  | -9.1040  | 14.3380 | N | 0 | 7.4260  | -15.7130 | 12.2530 | C | 0 |
| 2.0250  | -6.9030  | -6.5480  | C | 0 | 10.2250 | -9.6960  | 13.7680 | H | 0 | 7.5340  | -15.1950 | 13.1950 | H | 0 |
| 2.2430  | -5.9150  | -7.4790  | C | 0 | 9.5070  | -9.4020  | 15.8000 | C | 0 | 7.4770  | -17.1060 | 12.0560 | C | 0 |
| 1.4730  | -5.1770  | -7.6480  | H | 0 | 8.5880  | -9.0370  | 16.2590 | H | 0 | 7.7280  | -17.8760 | 12.7700 | H | 0 |
| 3.4860  | -5.9460  | -8.1530  | C | 0 | 9.3790  | -10.9710 | 15.9400 | C | 0 | 7.2060  | -17.5890 | 10.7590 | C | 0 |
| 3.7090  | -5.3610  | -9.0330  | H | 0 | 9.1620  | -11.1620 | 16.9910 | H | 0 | 7.0740  | -18.6410 | 10.5520 | H | 0 |
| 4.4580  | -6.8440  | -7.7300  | C | 0 | 8.2110  | -11.5540 | 15.1020 | C | 0 | 6.9880  | -16.6970 | 9.6970  | C | 0 |
| 5.4110  | -6.7680  | -8.2320  | H | 0 | 8.6110  | -11.8120 | 14.1220 | H | 0 | 6.8410  | -17.0910 | 8.7030  | H | 0 |
| 4.2260  | -7.8610  | -6.7620  | C | 0 | 7.9430  | -12.5060 | 15.5610 | H | 0 | 7.9330  | -12.7740 | 7.0310  | C | 0 |
| 4.9480  | -8.6310  | -6.5300  | H | 0 | 7.3720  | -10.8600 | 15.1540 | H | 0 | 7.7020  | -11.5260 | 7.0870  | O | 0 |
| 2.9800  | -7.8900  | -6.2000  | C | 0 | 10.6370 | -11.4770 | 15.6230 | O | 0 | 7.7920  | -13.4160 | 5.9110  | N | 0 |
| 3.2800  | -9.3240  | -1.9310  | C | 0 | 10.7890 | -11.1590 | 14.7300 | H | 0 | 7.7900  | -14.4250 | 5.8700  | H | 0 |
| 2.1290  | -9.0440  | -1.8550  | O | 0 | 10.6150 | -8.9180  | 16.8230 | C | 0 | 7.2720  | -12.8000 | 4.6710  | C | 0 |
| 4.0300  | -9.6100  | -0.9020  | N | 0 | 11.7500 | -8.7380  | 16.4640 | O | 0 | 6.4160  | -12.1720 | 4.9180  | H | 0 |
| 5.0370  | -9.5910  | -0.9860  | H | 0 | 10.2780 | -8.7410  | 18.0970 | N | 0 | 8.2900  | -11.9440 | 3.9420  | C | 0 |
| 3.5670  | -9.8960  | 0.4970   | C | 0 | 9.3180  | -8.7410  | 18.4090 | H | 0 | 7.7900  | -11.3080 | 3.2120  | H | 0 |
| 2.5020  | -9.6620  | 0.5070   | H | 0 | 11.3110 | -8.5730  | 19.1690 | C | 0 | 8.7250  | -11.2990 | 4.7050  | H | 0 |
| 3.6710  | -11.4120 | 0.8330   | C | 0 | 11.8770 | -7.7110  | 18.8140 | H | 0 | 9.3950  | -12.6250 | 3.2390  | C | 0 |
| 3.1110  | -11.9760 | 0.0870   | H | 0 | 10.6990 | -8.3210  | 20.5820 | C | 0 | 10.4270 | -13.4220 | 3.8630  | C | 0 |
| 4.7390  | -11.5270 | 0.6490   | H | 0 | 10.1180 | -9.1740  | 20.9340 | H | 0 | 10.4480 | -13.5630 | 4.9340  | H | 0 |
| 3.2850  | -11.7180 | 2.1300   | O | 0 | 11.4990 | -8.0910  | 21.2860 | H | 0 | 11.3330 | -14.2140 | 3.0960  | C | 0 |
| 2.3340  | -11.7430 | 2.2640   | H | 0 | 9.9760  | -7.5210  | 20.4260 | H | 0 | 11.9760 | -14.8570 | 3.6780  | H | 0 |
| 4.3290  | -9.0440  | 1.5750   | C | 0 | 12.2700 | -9.8250  | 19.2370 | C | 0 | 11.2910 | -14.1190 | 1.7060  | C | 0 |
| 5.5370  | -9.1780  | 1.6120   | O | 0 | 13.4760 | -9.7700  | 19.5230 | O | 0 | 12.2550 | -14.7530 | 0.9610  | O | 0 |
| 3.6020  | -8.2340  | 2.4190   | N | 0 | 11.9370 | -11.0660 | 18.8700 | N | 0 | 11.9240 | -14.7600 | 0.0600  | H | 0 |
| 2.6280  | -8.0970  | 2.1870   | H | 0 | 10.9440 | -11.2140 | 18.7640 | H | 0 | 10.4130 | -13.2610 | 1.0040  | C | 0 |
| 4.3280  | -7.3010  | 3.2370   | C | 0 | 12.7740 | -12.2670 | 18.7700 | C | 0 | 10.3040 | -13.2410 | -0.0710 | H | 0 |
| 5.1210  | -6.9020  | 2.6050   | H | 0 | 13.4140 | -12.3590 | 19.6470 | H | 0 | 9.4630  | -12.5160 | 1.7800  | C | 0 |
| 3.6600  | -6.5000  | 3.5550   | H | 0 | 12.1120 | -13.1090 | 18.5680 | H | 0 | 8.7180  | -11.9360 | 1.2570  | H | 0 |

|        |          |         |   |   |         |          |         |   |   |         |          |         |   |   |
|--------|----------|---------|---|---|---------|----------|---------|---|---|---------|----------|---------|---|---|
| 6.7390 | -13.9180 | 3.7140  | C | 0 | 9.2570  | -24.7400 | 1.7940  | H | 0 | 16.3900 | -13.8590 | 11.6150 | H | 0 |
| 6.8210 | -15.1280 | 3.9850  | O | 0 | 8.3970  | -23.1010 | 0.6440  | C | 0 | 18.2020 | -14.7600 | 10.9130 | C | 0 |
| 6.4360 | -13.5490 | 2.4950  | N | 0 | 8.0190  | -22.5590 | 1.4980  | H | 0 | 17.8930 | -15.5440 | 11.6040 | H | 0 |
| 6.4570 | -12.5770 | 2.2210  | H | 0 | 7.9640  | -22.6900 | -0.6400 | C | 0 | 18.6810 | -15.0520 | 9.9780  | H | 0 |
| 5.9890 | -14.4960 | 1.4410  | C | 0 | 5.3780  | -19.0520 | 1.0430  | C | 0 | 19.3120 | -13.8490 | 11.5000 | C | 0 |
| 6.5440 | -15.4160 | 1.6260  | H | 0 | 5.6150  | -17.8450 | 0.7800  | O | 0 | 20.5030 | -13.9430 | 11.1700 | O | 0 |
| 4.9120 | -14.6590 | 1.4620  | H | 0 | 5.1820  | -19.5180 | 2.2970  | N | 0 | 18.9630 | -12.9680 | 12.3490 | O | 0 |
| 6.2090 | -14.0990 | 0.0130  | C | 0 | 5.1710  | -20.5180 | 2.4400  | H | 0 | 17.2200 | -12.5270 | 10.1550 | C | 0 |
| 6.6590 | -13.0010 | -0.2810 | O | 0 | 5.4010  | -18.7510 | 3.4450  | C | 0 | 17.9360 | -12.3290 | 9.1620  | O | 0 |
| 5.8950 | -14.9600 | -0.8910 | N | 0 | 5.3100  | -17.6810 | 3.2560  | H | 0 | 16.7080 | -11.5090 | 10.8220 | N | 0 |
| 5.5400 | -15.8130 | -0.4810 | H | 0 | 4.3210  | -19.1050 | 4.4090  | C | 0 | 16.3700 | -11.6210 | 11.7670 | H | 0 |
| 6.0460 | -14.8150 | -2.3350 | C | 0 | 3.3550  | -19.0860 | 3.9050  | H | 0 | 16.7590 | -10.1470 | 10.3520 | C | 0 |
| 6.2790 | -13.7620 | -2.4920 | H | 0 | 4.3320  | -20.1600 | 4.6800  | H | 0 | 16.4290 | -10.1320 | 9.3140  | H | 0 |
| 7.3720 | -15.4390 | -2.9250 | C | 0 | 4.2560  | -18.2820 | 5.6550  | C | 0 | 15.7370 | -9.3130  | 11.1180 | C | 0 |
| 7.3390 | -15.3110 | -4.0070 | H | 0 | 4.5930  | -16.9230 | 5.6440  | C | 0 | 15.5200 | -8.4670  | 10.4660 | H | 0 |
| 8.7030 | -14.7040 | -2.4610 | C | 0 | 4.8220  | -16.2990 | 4.7930  | H | 0 | 14.3530 | -10.0190 | 11.1280 | C | 0 |
| 9.5780 | -15.2530 | -2.8090 | H | 0 | 4.4040  | -16.2080 | 6.7950  | C | 0 | 13.5510 | -9.3540  | 11.4490 | H | 0 |
| 8.7440 | -13.6570 | -2.7610 | H | 0 | 4.6970  | -15.1720 | 6.7140  | H | 0 | 14.0270 | -10.3850 | 10.1550 | H | 0 |
| 8.8250 | -14.8280 | -1.3850 | H | 0 | 4.1060  | -16.8420 | 7.9710  | C | 0 | 14.4060 | -10.7800 | 11.9060 | H | 0 |
| 7.4250 | -16.8590 | -2.6260 | O | 0 | 4.0940  | -16.2960 | 8.9030  | H | 0 | 16.2040 | -8.6250  | 12.4210 | C | 0 |
| 7.2200 | -17.3020 | -3.4520 | H | 0 | 3.9270  | -18.2290 | 7.9910  | C | 0 | 16.8670 | -9.3170  | 12.9400 | H | 0 |
| 4.8680 | -15.2630 | -3.2260 | C | 0 | 3.6570  | -18.6300 | 8.9570  | H | 0 | 16.7650 | -7.7190  | 12.1930 | H | 0 |
| 4.0930 | -16.1150 | -2.8990 | O | 0 | 3.8930  | -18.9380 | 6.8420  | C | 0 | 15.0630 | -8.2010  | 13.3680 | C | 0 |
| 4.7580 | -14.5230 | -4.3720 | N | 0 | 3.5590  | -19.9620 | 6.7550  | H | 0 | 14.4330 | -7.4580  | 12.8790 | H | 0 |
| 5.3780 | -13.7310 | -4.4620 | H | 0 | 6.8410  | -19.1470 | 3.9240  | C | 0 | 14.3710 | -8.9600  | 13.7300 | H | 0 |
| 3.8090 | -14.7570 | -5.4590 | C | 0 | 7.3270  | -20.1810 | 3.5710  | O | 0 | 15.5240 | -7.8100  | 14.2750 | H | 0 |
| 2.8620 | -14.4190 | -5.0380 | H | 0 | 7.4900  | -18.2270 | 4.6350  | N | 0 | 18.1440 | -9.4990  | 10.4330 | C | 0 |
| 4.0600 | -13.7800 | -6.6350 | C | 0 | 7.0000  | -17.3520 | 4.7560  | H | 0 | 18.3980 | -8.4160  | 9.9480  | O | 0 |
| 4.0710 | -12.7940 | -6.1700 | H | 0 | 8.9420  | -18.2130 | 4.7700  | C | 0 | 19.0980 | -10.1700 | 11.1170 | N | 0 |
| 4.9570 | -14.0540 | -7.1900 | H | 0 | 9.3870  | -19.2010 | 4.8870  | H | 0 | 18.7400 | -11.0170 | 11.5350 | H | 0 |
| 2.8490 | -13.7490 | -7.6110 | C | 0 | 9.5450  | -17.5770 | 3.4380  | C | 0 | 20.4760 | -9.8220  | 11.2940 | C | 0 |
| 2.7380 | -14.7520 | -8.0240 | H | 0 | 9.2140  | -16.5390 | 3.4730  | H | 0 | 20.6310 | -8.7430  | 11.2800 | H | 0 |
| 1.9950 | -13.5580 | -6.9620 | H | 0 | 10.6020 | -17.4220 | 3.6560  | H | 0 | 20.8480 | -10.2080 | 12.7070 | C | 0 |
| 2.8670 | -12.6140 | -8.9020 | S | 0 | 9.2660  | -18.2420 | 2.0290  | C | 0 | 20.2740 | -9.6910  | 13.4750 | H | 0 |
| 2.0470 | -11.2120 | -7.9430 | C | 0 | 9.2760  | -19.3320 | 2.0220  | H | 0 | 20.9150 | -11.2910 | 12.8010 | H | 0 |
| 0.9860 | -11.4280 | -7.8230 | H | 0 | 8.2670  | -17.9500 | 1.7050  | H | 0 | 22.2820 | -9.7360  | 12.9730 | C | 0 |
| 2.4080 | -11.1500 | -6.9160 | H | 0 | 10.2290 | -17.6320 | 0.9110  | C | 0 | 23.0970 | -9.9410  | 12.2790 | H | 0 |
| 2.2230 | -10.3240 | -8.5500 | H | 0 | 10.1210 | -16.5490 | 0.8600  | H | 0 | 22.3010 | -8.6460  | 12.9980 | H | 0 |
| 3.6510 | -16.2070 | -5.9210 | C | 0 | 11.2480 | -17.9660 | 1.1020  | H | 0 | 22.7250 | -10.2110 | 14.3890 | C | 0 |
| 2.5160 | -16.5150 | -6.3420 | O | 0 | 9.8040  | -18.0910 | -0.4880 | C | 0 | 22.9390 | -11.2800 | 14.3800 | H | 0 |
| 4.6430 | -17.1120 | -5.8040 | N | 0 | 9.6890  | -19.1750 | -0.4620 | H | 0 | 23.7400 | -9.8260  | 14.4920 | H | 0 |
| 5.5620 | -16.7080 | -5.6920 | H | 0 | 8.8660  | -17.6230 | -0.7890 | H | 0 | 21.8780 | -9.8080  | 15.6740 | C | 0 |
| 4.5720 | -18.5580 | -6.1940 | C | 0 | 10.7860 | -17.8390 | -1.5720 | N | 0 | 20.8420 | -10.1450 | 15.6660 | H | 0 |
| 3.9100 | -18.4950 | -7.0580 | H | 0 | 11.6720 | -18.2480 | -1.3120 | H | 0 | 22.1560 | -10.3550 | 16.5760 | H | 0 |
| 5.9610 | -19.0450 | -6.5520 | C | 0 | 10.4640 | -18.3060 | -2.4080 | H | 0 | 21.8520 | -8.3260  | 15.8050 | N | 0 |
| 5.9520 | -20.0030 | -7.0170 | H | 0 | 10.8490 | -16.8510 | -1.7740 | H | 0 | 21.6060 | -7.8850  | 14.9300 | H | 0 |
| 6.4020 | -18.3590 | -7.2760 | H | 0 | 9.4600  | -17.2760 | 5.9250  | C | 0 | 21.3420 | -8.1830  | 16.6650 | H | 0 |
| 7.0250 | -19.1830 | -5.4620 | C | 0 | 8.7700  | -16.3160 | 6.1870  | O | 0 | 22.7610 | -7.9090  | 15.9440 | H | 0 |
| 6.9740 | -18.4490 | -4.4630 | O | 0 | 10.5840 | -17.5230 | 6.5700  | N | 0 | 21.3900 | -10.2710 | 10.1860 | C | 0 |
| 7.8560 | -20.0990 | -5.5160 | O | 0 | 10.9580 | -18.4580 | 6.4810  | H | 0 | 22.1500 | -9.4600  | 9.6480  | O | 0 |
| 3.8900 | -19.4220 | -5.0810 | C | 0 | 11.0670 | -16.7640 | 7.7760  | C | 0 | 21.2320 | -11.5560 | 9.6890  | N | 0 |
| 3.7890 | -20.6480 | -5.1740 | O | 0 | 10.7450 | -15.7220 | 7.7690  | H | 0 | 20.7110 | -12.2180 | 10.2460 | H | 0 |
| 3.6060 | -18.8340 | -3.8500 | N | 0 | 10.4360 | -17.3840 | 8.9960  | C | 0 | 22.1190 | -12.0580 | 8.6280  | C | 0 |
| 3.5850 | -17.8240 | -3.8470 | H | 0 | 10.5740 | -18.4650 | 9.0020  | H | 0 | 22.8760 | -11.3320 | 8.3330  | H | 0 |
| 2.8150 | -19.5360 | -2.8810 | C | 0 | 10.7420 | -16.9950 | 9.9680  | H | 0 | 22.8720 | -13.3590 | 8.9980  | C | 0 |
| 2.2240 | -18.8150 | -2.3180 | H | 0 | 9.3730  | -17.1450 | 8.9480  | H | 0 | 23.5800 | -13.6150 | 8.2100  | H | 0 |
| 2.1450 | -20.1620 | -3.4700 | H | 0 | 12.6150 | -16.6970 | 7.7740  | C | 0 | 23.5450 | -13.2500 | 10.3670 | C | 0 |
| 3.6800 | -20.3410 | -1.8640 | C | 0 | 13.3330 | -17.6510 | 7.4260  | O | 0 | 22.8680 | -12.8410 | 11.1170 | H | 0 |
| 3.4400 | -21.5360 | -1.7350 | O | 0 | 13.1180 | -15.5930 | 8.3410  | N | 0 | 23.9120 | -14.2170 | 10.7100 | H | 0 |
| 4.6240 | -19.6540 | -1.2470 | N | 0 | 12.4380 | -14.8980 | 8.6130  | H | 0 | 24.4390 | -12.6300 | 10.2900 | H | 0 |
| 4.6120 | -18.6500 | -1.3600 | H | 0 | 14.4790 | -15.0410 | 8.0960  | C | 0 | 21.9260 | -14.4060 | 8.9970  | O | 0 |
| 5.4380 | -20.1450 | -0.1100 | C | 0 | 15.1060 | -15.8670 | 7.7610  | H | 0 | 21.2890 | -14.2660 | 9.7010  | H | 0 |
| 5.1060 | -21.0880 | 0.3240  | H | 0 | 14.3830 | -13.9150 | 6.9540  | C | 0 | 21.4550 | -12.2280 | 7.3190  | C | 0 |
| 6.8950 | -20.2260 | -0.5600 | C | 0 | 13.5640 | -13.2510 | 7.2300  | H | 0 | 22.1780 | -12.3030 | 6.2890  | O | 0 |
| 7.0810 | -19.4320 | -1.2830 | H | 0 | 15.7020 | -13.1120 | 6.8300  | C | 0 | 20.1230 | -12.0340 | 7.2800  | N | 0 |
| 7.5910 | -20.0800 | 0.2660  | H | 0 | 15.8930 | -12.4240 | 7.6540  | H | 0 | 19.6590 | -11.9590 | 8.1740  | H | 0 |
| 7.2990 | -21.5630 | -1.1660 | C | 0 | 16.5440 | -13.8000 | 6.7560  | H | 0 | 19.3830 | -12.0320 | 6.0300  | C | 0 |
| 7.1620 | -21.8380 | -2.5200 | C | 0 | 15.6960 | -12.5750 | 5.8820  | H | 0 | 18.3700 | -11.6830 | 6.2280  | H | 0 |
| 6.7660 | -21.1070 | -3.2090 | H | 0 | 13.9920 | -14.5080 | 5.6410  | C | 0 | 19.9670 | -11.4580 | 5.3110  | H | 0 |
| 7.7430 | -23.0230 | -2.8860 | N | 0 | 14.7470 | -15.2570 | 5.4020  | H | 0 | 19.3720 | -13.4340 | 5.3590  | C | 0 |
| 7.7770 | -23.3840 | -3.8290 | H | 0 | 12.9780 | -14.9030 | 5.5820  | H | 0 | 19.5770 | -13.5310 | 4.1800  | O | 0 |
| 8.2710 | -23.6750 | -1.7420 | C | 0 | 14.1130 | -13.7270 | 4.8900  | H | 0 | 19.1720 | -14.4930 | 6.0950  | N | 0 |
| 8.9760 | -24.7990 | -1.5760 | C | 0 | 15.0310 | -14.4030 | 9.3940  | C | 0 | 19.0560 | -14.3360 | 7.0860  | H | 0 |
| 9.1690 | -25.4880 | -2.3850 | H | 0 | 14.3190 | -13.6430 | 10.0390 | O | 0 | 19.0740 | -15.9060 | 5.7240  | C | 0 |
| 9.4030 | -25.1530 | -0.2930 | C | 0 | 16.2330 | -14.7770 | 9.6860  | N | 0 | 19.2010 | -16.0060 | 4.6460  | H | 0 |
| 9.8950 | -26.1090 | -0.1880 | H | 0 | 16.7720 | -15.4010 | 9.1020  | H | 0 | 20.2980 | -16.5890 | 6.4230  | C | 0 |
| 9.0920 | -24.3570 | 0.7980  | C | 0 | 16.9320 | -13.9840 | 10.6770 | C | 0 | 20.4660 | -16.3360 | 7.4690  | H | 0 |

|         |          |         |   |   |         |          |         |   |   |         |          |         |   |   |
|---------|----------|---------|---|---|---------|----------|---------|---|---|---------|----------|---------|---|---|
| 20.1250 | -17.6610 | 6.3270  | H | 0 | 9.8930  | -22.0270 | 4.8970  | C | 0 | -2.5490 | -24.8550 | -1.8080 | H | 0 |
| 21.5650 | -16.3000 | 5.6270  | C | 0 | 9.2590  | -21.2450 | 5.3150  | H | 0 | -2.2430 | -23.0880 | -2.9910 | C | 0 |
| 21.4050 | -16.7710 | 4.6570  | H | 0 | 10.5110 | -21.3580 | 3.6180  | C | 0 | -2.9670 | -23.1690 | -3.9780 | O | 0 |
| 21.6330 | -15.2140 | 5.5700  | H | 0 | 9.6870  | -21.0060 | 2.9980  | H | 0 | -1.8660 | -21.8430 | -2.5890 | N | 0 |
| 22.7560 | -16.8510 | 6.3710  | C | 0 | 11.0280 | -20.4220 | 3.8330  | H | 0 | -1.4580 | -21.5590 | -1.7090 | H | 0 |
| 22.8010 | -16.3620 | 7.3440  | H | 0 | 11.3880 | -22.2490 | 2.7600  | C | 0 | -1.8350 | -20.7150 | -3.5870 | C | 0 |
| 22.6930 | -17.9300 | 6.5130  | H | 0 | 12.3120 | -22.3700 | 3.3240  | H | 0 | -1.7160 | -21.1360 | -4.5850 | H | 0 |
| 23.9440 | -16.6000 | 5.5010  | C | 0 | 10.8730 | -23.2090 | 2.7370  | H | 0 | -3.2430 | -20.1010 | -3.7850 | C | 0 |
| 23.8600 | -17.2030 | 4.5970  | H | 0 | 11.6710 | -21.8020 | 1.3610  | C | 0 | -3.9210 | -20.9410 | -3.9390 | H | 0 |
| 23.9690 | -15.5540 | 5.1950  | H | 0 | 11.0870 | -20.9010 | 0.7380  | O | 0 | -3.4560 | -19.5640 | -2.8610 | H | 0 |
| 25.1850 | -17.0060 | 6.3080  | N | 0 | 12.6880 | -22.4080 | 0.7880  | N | 0 | -3.3200 | -19.2120 | -4.8220 | O | 0 |
| 25.1380 | -17.9760 | 6.5850  | H | 0 | 12.9340 | -22.1450 | -0.1550 | H | 0 | -3.2840 | -19.6790 | -5.6600 | H | 0 |
| 26.0440 | -16.8310 | 5.8070  | H | 0 | 13.1910 | -23.1510 | 1.2530  | H | 0 | -0.8000 | -19.6100 | -3.2230 | C | 0 |
| 25.2680 | -16.5100 | 7.1840  | H | 0 | 8.9950  | -23.3070 | 4.7030  | C | 0 | -0.3030 | -19.4280 | -2.1000 | O | 0 |
| 17.7840 | -16.6490 | 6.1590  | C | 0 | 9.3180  | -24.4430 | 5.0950  | O | 0 | -0.4490 | -18.7940 | -4.3080 | N | 0 |
| 17.3730 | -16.5330 | 7.2820  | O | 0 | 7.8410  | -23.1020 | 4.1480  | N | 0 | -0.8400 | -19.1540 | -5.1670 | H | 0 |
| 17.2600 | -17.4380 | 5.2140  | N | 0 | 7.5740  | -22.1420 | 3.9810  | H | 0 | 0.4300  | -17.7110 | -4.2930 | C | 0 |
| 17.6270 | -17.5440 | 4.2780  | H | 0 | 6.7520  | -24.1550 | 3.8750  | C | 0 | 1.4620  | -18.0390 | -4.1720 | H | 0 |
| 16.0430 | -18.1900 | 5.4740  | C | 0 | 7.1290  | -25.1440 | 3.6150  | H | 0 | 0.3330  | -17.2630 | -5.2820 | H | 0 |
| 15.3550 | -17.5980 | 6.0770  | H | 0 | 5.8810  | -24.3430 | 5.0740  | C | 0 | 0.1000  | -16.6980 | -3.1140 | C | 0 |
| 15.1050 | -18.4230 | 4.1970  | C | 0 | 6.5050  | -24.8530 | 5.8080  | H | 0 | -1.0340 | -16.3550 | -2.8690 | O | 0 |
| 15.7920 | -18.4290 | 3.3510  | H | 0 | 5.6380  | -23.4030 | 5.5690  | H | 0 | 1.0860  | -16.2940 | -2.3560 | N | 0 |
| 14.3420 | -19.8300 | 4.1390  | C | 0 | 4.4850  | -24.9410 | 4.7370  | C | 0 | 2.0320  | -16.6020 | -2.5310 | H | 0 |
| 13.5210 | -19.8340 | 4.8570  | H | 0 | 3.8610  | -24.2050 | 4.2290  | H | 0 | 0.8460  | -15.2380 | -1.3840 | C | 0 |
| 13.9160 | -19.9620 | 3.1450  | H | 0 | 4.6200  | -25.7610 | 4.0320  | H | 0 | -0.1900 | -15.3090 | -1.0530 | H | 0 |
| 15.0180 | -20.6140 | 4.4820  | H | 0 | 3.6330  | -25.4690 | 5.9470  | C | 0 | 1.7770  | -15.3120 | -0.1010 | C | 0 |
| 14.1180 | -17.3330 | 3.8110  | C | 0 | 4.0220  | -25.2780 | 7.0460  | O | 0 | 2.8070  | -15.2720 | -0.4560 | H | 0 |
| 13.3000 | -17.6480 | 3.1640  | H | 0 | 2.4310  | -25.8290 | 5.6850  | N | 0 | 1.5950  | -14.2380 | 0.9980  | C | 0 |
| 13.7120 | -16.8130 | 4.6790  | H | 0 | 1.7190  | -25.9280 | 6.3940  | H | 0 | 2.4900  | -14.1230 | 1.6110  | H | 0 |
| 14.7040 | -16.6000 | 3.2570  | H | 0 | 2.3040  | -25.9400 | 4.6890  | H | 0 | 1.4570  | -13.2440 | 0.5730  | H | 0 |
| 16.2630 | -19.4560 | 6.3610  | C | 0 | 5.9030  | -23.6560 | 2.6440  | C | 0 | 0.7140  | -14.4260 | 1.6120  | H | 0 |
| 17.0820 | -20.3740 | 6.2000  | O | 0 | 5.6690  | -22.4360 | 2.4460  | O | 0 | 1.5770  | -16.6280 | 0.6180  | C | 0 |
| 15.6600 | -19.4080 | 7.5500  | N | 0 | 5.4980  | -24.6580 | 1.7870  | N | 0 | 0.5690  | -16.6920 | 1.0270  | H | 0 |
| 15.1250 | -18.6030 | 7.8430  | H | 0 | 5.8250  | -25.5550 | 2.1160  | H | 0 | 1.5700  | -17.4390 | -0.1100 | H | 0 |
| 15.5970 | -20.3570 | 8.6590  | C | 0 | 4.8200  | -24.4200 | 0.4980  | C | 0 | 2.6470  | -17.0550 | 1.6530  | C | 0 |
| 16.5480 | -20.8750 | 8.7820  | H | 0 | 5.1190  | -23.4680 | 0.0590  | H | 0 | 3.6560  | -16.7300 | 1.3990  | H | 0 |
| 15.3500 | -19.6450 | 10.0590 | C | 0 | 5.2110  | -25.5500 | -0.4900 | C | 0 | 2.3270  | -16.6820 | 2.6270  | H | 0 |
| 14.4140 | -19.1100 | 9.8960  | H | 0 | 6.2700  | -25.4270 | -0.7150 | H | 0 | 2.6390  | -18.1410 | 1.5670  | H | 0 |
| 15.2590 | -20.3560 | 10.8800 | H | 0 | 5.0590  | -26.5220 | -0.0210 | H | 0 | 1.0780  | -13.8370 | -1.9820 | C | 0 |
| 16.2860 | -18.4860 | 10.4880 | C | 0 | 4.4010  | -25.5000 | -1.8150 | C | 0 | 2.1590  | -13.4980 | -2.4080 | O | 0 |
| 15.1260 | -17.5110 | 10.0270 | H | 0 | 4.6330  | -26.4650 | -2.2670 | H | 0 | -0.0130 | -13.1240 | -1.9270 | N | 0 |
| 16.0900 | -18.1660 | 12.0450 | C | 0 | 3.3200  | -25.5180 | -1.6810 | H | 0 | -0.9080 | -13.4390 | -1.5810 | H | 0 |
| 16.3600 | -19.0920 | 12.5540 | H | 0 | 4.7810  | -24.3400 | -2.7690 | C | 0 | -0.0070 | -11.7450 | -2.3390 | C | 0 |
| 16.7200 | -17.3620 | 12.4250 | H | 0 | 5.0380  | -23.4550 | -2.1870 | H | 0 | 1.0120  | -11.3590 | -2.3760 | H | 0 |
| 15.0820 | -17.8040 | 12.2450 | H | 0 | 5.6340  | -24.7060 | -3.3400 | H | 0 | -0.7380 | -11.6200 | -3.6380 | C | 0 |
| 17.8410 | -18.8300 | 10.3820 | C | 0 | 3.7280  | -24.1210 | -3.8400 | C | 0 | -0.6350 | -10.5730 | -3.9250 | H | 0 |
| 18.0650 | -19.2770 | 9.4140  | H | 0 | 3.1600  | -25.0220 | -4.0720 | H | 0 | -0.3210 | -12.5120 | -4.8050 | C | 0 |
| 18.4410 | -17.9250 | 10.4790 | H | 0 | 3.0430  | -23.3310 | -3.5330 | H | 0 | -0.4410 | -13.5390 | -4.4600 | H | 0 |
| 18.1360 | -19.5300 | 11.1640 | H | 0 | 4.2350  | -23.4370 | -5.0890 | N | 0 | -0.8710 | -12.4250 | -5.7420 | H | 0 |
| 14.5740 | -21.4840 | 8.3460  | C | 0 | 3.7840  | -22.5330 | -5.0770 | H | 0 | 0.7480  | -12.3980 | -4.9850 | H | 0 |
| 14.9600 | -22.6940 | 8.4020  | O | 0 | 5.2340  | -23.4270 | -5.2330 | H | 0 | -2.2440 | -11.8600 | -3.4780 | C | 0 |
| 13.3430 | -21.0320 | 8.0230  | N | 0 | 3.7680  | -23.7230 | -5.9380 | H | 0 | -2.3740 | -12.9200 | -3.6960 | H | 0 |
| 13.1480 | -20.0420 | 7.9680  | H | 0 | 3.2900  | -24.4100 | 0.7710  | C | 0 | -2.5480 | -11.8180 | -2.4320 | H | 0 |
| 12.1490 | -21.8550 | 7.8550  | C | 0 | 2.7740  | -25.3130 | 1.4810  | O | 0 | -3.1060 | -10.9020 | -4.2910 | C | 0 |
| 12.3280 | -22.9310 | 7.8430  | H | 0 | 2.5730  | -23.4510 | 0.2290  | N | 0 | -3.1610 | -9.9660  | -3.7350 | H | 0 |
| 11.3150 | -21.5840 | 9.1240  | C | 0 | 3.0600  | -22.8660 | -0.4350 | H | 0 | -2.8790 | -10.7840 | -5.3500 | H | 0 |
| 11.9080 | -21.9180 | 9.9760  | H | 0 | 1.1030  | -23.4090 | 0.3130  | C | 0 | -4.1010 | -11.3340 | -4.1860 | H | 0 |
| 11.1920 | -20.5140 | 9.2890  | H | 0 | 0.7670  | -24.1150 | 1.0730  | H | 0 | -0.5950 | -10.7650 | -1.2550 | C | 0 |
| 10.0120 | -22.1960 | 9.2400  | C | 0 | 0.6700  | -22.0150 | 0.9300  | C | 0 | -0.8290 | -9.5760  | -1.5190 | O | 0 |
| 9.7820  | -23.2810 | 10.0050 | C | 0 | 0.9130  | -21.2370 | 0.2060  | H | 0 | -0.9180 | -11.3220 | -0.1050 | N | 0 |
| 10.5200 | -23.7490 | 10.6400 | H | 0 | -0.4000 | -22.0450 | 1.1380  | H | 0 | -0.7100 | -12.3050 | -0.0060 | H | 0 |
| 8.4770  | -23.7770 | 9.8770  | N | 0 | 1.4440  | -21.6500 | 2.1910  | C | 0 | -1.3790 | -10.5550 | 1.1010  | C | 0 |
| 8.0760  | -24.5040 | 10.4510 | H | 0 | 2.5000  | -21.4730 | 1.9890  | H | 0 | -1.9260 | -9.6340  | 0.9000  | H | 0 |
| 7.7530  | -22.9570 | 9.0770  | C | 0 | 0.7450  | -20.3900 | 2.6680  | C | 0 | -2.1220 | -11.2400 | 1.5110  | H | 0 |
| 6.4470  | -22.9610 | 8.6010  | C | 0 | 1.0660  | -20.1070 | 3.6710  | H | 0 | -0.3360 | -10.4270 | 2.1880  | C | 0 |
| 5.8590  | -23.8260 | 8.8670  | H | 0 | 1.0490  | -19.5710 | 2.0170  | H | 0 | 0.6520  | -11.1730 | 2.0990  | O | 0 |
| 6.0150  | -21.9650 | 7.7070  | C | 0 | -0.3450 | -20.3940 | 2.6640  | H | 0 | -0.6190 | -9.6690  | 3.3190  | N | 0 |
| 5.0410  | -22.0600 | 7.2500  | H | 0 | 1.3510  | -22.5740 | 3.3560  | C | 0 | -1.5820 | -9.3690  | 3.3820  | H | 0 |
| 6.9220  | -20.9440 | 7.3360  | C | 0 | 1.6540  | -22.1540 | 4.3150  | H | 0 | 0.3140  | -9.4830  | 4.3840  | C | 0 |
| 6.6330  | -20.0840 | 6.7500  | H | 0 | 0.2920  | -22.8220 | 3.4210  | H | 0 | 1.2330  | -9.7540  | 3.8640  | H | 0 |
| 8.2340  | -20.9450 | 7.8420  | C | 0 | 1.9480  | -23.4760 | 3.2200  | H | 0 | 0.4370  | -8.0250  | 4.7930  | C | 0 |
| 8.9230  | -20.1550 | 7.5840  | H | 0 | 0.4850  | -23.6950 | -1.1010 | C | 0 | 1.4230  | -8.0090  | 5.2570  | H | 0 |
| 8.6950  | -22.0180 | 8.5870  | C | 0 | 1.1780  | -23.6820 | -2.1710 | O | 0 | 0.3560  | -7.3710  | 3.9250  | H | 0 |
| 11.3950 | -21.4060 | 6.6310  | C | 0 | -0.8260 | -23.9600 | -1.0530 | N | 0 | -0.5140 | -7.5870  | 5.8860  | C | 0 |
| 11.1280 | -20.2000 | 6.5320  | O | 0 | -1.2510 | -23.9830 | -0.1370 | H | 0 | -0.2200 | -7.8670  | 7.0700  | O | 0 |
| 10.9610 | -22.3270 | 5.7720  | N | 0 | -1.6830 | -24.3030 | -2.1730 | C | 0 | -1.4620 | -6.7930  | 5.5210  | N | 0 |
| 11.3820 | -23.2420 | 5.8450  | H | 0 | -1.1110 | -24.9390 | -2.8470 | H | 0 | -2.1830 | -6.7150  | 6.2230  | H | 0 |

|         |          |         |   |   |         |          |         |   |   |         |          |         |   |   |
|---------|----------|---------|---|---|---------|----------|---------|---|---|---------|----------|---------|---|---|
| -1.5400 | -6.6300  | 4.5270  | H | 0 | 1.0870  | -12.6290 | 22.5770 | C | 0 | 0.7640  | -22.0900 | 21.9540 | C | 0 |
| 0.1360  | -10.4200 | 5.5960  | C | 0 | 1.4310  | -12.0300 | 21.7340 | H | 0 | 0.8420  | -22.4860 | 22.9660 | H | 0 |
| -0.9100 | -10.6880 | 6.1150  | O | 0 | 1.3400  | -11.8450 | 23.8990 | C | 0 | -0.2650 | -22.0690 | 21.5920 | H | 0 |
| 1.2390  | -11.0920 | 6.0780  | N | 0 | 2.4090  | -11.6380 | 23.9580 | H | 0 | 1.7080  | -22.8770 | 21.0040 | C | 0 |
| 2.3770  | -11.3870 | 5.2560  | C | 0 | 0.8070  | -10.9020 | 23.7770 | H | 0 | 1.1540  | -23.5930 | 20.3970 | H | 0 |
| 2.8800  | -10.4820 | 4.9130  | H | 0 | 0.9050  | -12.3800 | 24.7440 | H | 0 | 2.0400  | -22.1120 | 20.3030 | H | 0 |
| 2.0170  | -11.9750 | 4.4120  | H | 0 | 2.0710  | -13.8140 | 22.4840 | C | 0 | 2.6900  | -23.5550 | 21.8190 | N | 0 |
| 3.4120  | -12.1400 | 6.0560  | C | 0 | 2.1890  | -14.0640 | 21.4290 | H | 0 | 3.2410  | -24.1800 | 21.2470 | H | 0 |
| 4.1620  | -11.4170 | 6.3770  | H | 0 | 3.0330  | -13.4930 | 22.8840 | H | 0 | 3.2450  | -22.9580 | 22.4140 | H | 0 |
| 4.0440  | -12.8940 | 5.5870  | H | 0 | 1.7450  | -14.6310 | 23.1270 | H | 0 | 2.2240  | -24.1500 | 22.4880 | H | 0 |
| 2.5480  | -12.7580 | 7.0530  | C | 0 | -2.4330 | -13.9490 | 21.3130 | C | 0 | 0.8830  | -17.4080 | 22.0820 | C | 0 |
| 3.0720  | -12.9440 | 7.9910  | H | 0 | -3.3590 | -13.1010 | 21.2830 | O | 0 | -0.1480 | -16.7790 | 21.7220 | O | 0 |
| 2.3830  | -13.7420 | 6.6140  | H | 0 | -2.7690 | -15.2400 | 21.6170 | N | 0 | 2.0710  | -17.0900 | 21.5570 | N | 0 |
| 1.3190  | -11.9090 | 7.3050  | C | 0 | -1.9950 | -15.8660 | 21.4460 | H | 0 | 2.8620  | -17.6730 | 21.7900 | H | 0 |
| 0.4340  | -12.5460 | 7.2700  | H | 0 | -4.1270 | -15.7360 | 21.7910 | C | 0 | 2.1440  | -16.3920 | 20.2850 | C | 0 |
| 1.3460  | -11.0700 | 8.5660  | C | 0 | -4.8160 | -15.3250 | 21.0530 | H | 0 | 1.4990  | -15.5150 | 20.3390 | H | 0 |
| 1.9030  | -9.9490  | 8.5500  | O | 0 | -4.1920 | -16.8130 | 21.6340 | H | 0 | 3.5910  | -15.8960 | 20.1060 | C | 0 |
| 1.1060  | -11.7070 | 9.6780  | N | 0 | -4.6620 | -15.4560 | 23.1570 | C | 0 | 3.9840  | -15.5400 | 21.0580 | H | 0 |
| 1.0700  | -12.7160 | 9.6770  | H | 0 | -3.8850 | -14.9400 | 24.0110 | O | 0 | 4.1580  | -16.7880 | 19.8390 | H | 0 |
| 0.7860  | -11.0130 | 10.9450 | C | 0 | -5.9330 | -15.8200 | 23.4520 | N | 0 | 3.7720  | -14.8780 | 19.0060 | C | 0 |
| 1.3240  | -10.0650 | 10.9390 | H | 0 | -7.0150 | -16.2520 | 22.5590 | C | 0 | 3.6050  | -15.3350 | 18.0310 | H | 0 |
| -0.7130 | -10.5690 | 11.2410 | C | 0 | -6.5780 | -16.9810 | 21.8770 | H | 0 | 3.2020  | -13.9510 | 19.0620 | H | 0 |
| -0.6540 | -9.9440  | 12.1320 | H | 0 | -7.4640 | -15.5270 | 21.8810 | H | 0 | 5.2480  | -14.4200 | 18.9160 | C | 0 |
| -1.2910 | -9.6390  | 10.1500 | C | 0 | -8.1150 | -16.9800 | 23.3780 | C | 0 | 6.1300  | -14.8940 | 19.5660 | O | 0 |
| -0.5500 | -8.8750  | 9.9160  | H | 0 | -7.8650 | -18.0400 | 23.3400 | H | 0 | 5.6250  | -13.6220 | 17.9540 | N | 0 |
| -1.4050 | -10.2480 | 9.2530  | H | 0 | -9.0610 | -16.7530 | 22.8870 | H | 0 | 6.6150  | -13.4220 | 17.9420 | H | 0 |
| -2.2040 | -9.1910  | 10.5420 | H | 0 | -7.9690 | -16.2390 | 24.7510 | C | 0 | 5.0390  | -13.2260 | 17.2330 | H | 0 |
| -1.5510 | -11.7070 | 11.6520 | C | 0 | -8.3920 | -16.7710 | 25.6040 | H | 0 | 1.8050  | -17.2560 | 19.0750 | C | 0 |
| -1.8510 | -12.1870 | 10.7210 | H | 0 | -8.5200 | -15.3080 | 24.6130 | H | 0 | 2.2380  | -18.4110 | 18.9430 | O | 0 |
| -1.0640 | -12.4040 | 12.3340 | H | 0 | -6.4280 | -15.9850 | 24.8020 | C | 0 | 1.2300  | -16.7120 | 18.0480 | N | 0 |
| -2.8250 | -11.2300 | 12.2550 | C | 0 | -6.1980 | -15.0230 | 25.2610 | H | 0 | 0.9650  | -15.7590 | 18.2520 | H | 0 |
| -2.6770 | -11.3090 | 13.3320 | H | 0 | -5.7270 | -17.1010 | 25.5520 | C | 0 | 0.8790  | -17.1590 | 16.7100 | C | 0 |
| -3.0720 | -10.1940 | 12.0240 | H | 0 | -5.5250 | -16.9660 | 26.7460 | O | 0 | 1.2630  | -18.1650 | 16.5370 | H | 0 |
| -3.6170 | -11.8920 | 11.9050 | H | 0 | -5.0840 | -18.0860 | 24.9290 | N | 0 | -0.6190 | -17.3780 | 16.5900 | C | 0 |
| 1.3810  | -11.7520 | 12.1400 | C | 0 | -5.0030 | -18.0210 | 23.9240 | H | 0 | -1.1040 | -16.4060 | 16.6850 | H | 0 |
| 1.6160  | -12.9200 | 11.9940 | O | 0 | -4.2800 | -19.1260 | 25.5870 | C | 0 | -0.8240 | -17.6980 | 15.5680 | H | 0 |
| 1.5550  | -11.1790 | 13.3260 | N | 0 | -4.6740 | -19.4010 | 26.5660 | H | 0 | -1.3160 | -18.4360 | 17.4990 | C | 0 |
| 1.4100  | -10.1860 | 13.4430 | H | 0 | -4.2910 | -20.5180 | 24.8540 | C | 0 | -1.8110 | -18.0460 | 18.7670 | C | 0 |
| 1.6240  | -12.0400 | 14.5660 | C | 0 | -3.7580 | -21.0930 | 25.6120 | H | 0 | -1.7570 | -17.0210 | 19.1020 | H | 0 |
| 1.3460  | -13.0730 | 14.3570 | H | 0 | -5.3280 | -20.8370 | 24.7500 | H | 0 | -2.1130 | -19.0110 | 19.7310 | C | 0 |
| 3.1240  | -12.0580 | 15.0740 | C | 0 | -3.4600 | -20.5370 | 23.5970 | C | 0 | -2.3680 | -18.7450 | 20.7460 | H | 0 |
| 3.7440  | -12.3260 | 14.2190 | H | 0 | -3.0620 | -19.4870 | 23.0830 | O | 0 | -2.1500 | -20.3600 | 19.3120 | C | 0 |
| 3.6770  | -10.5970 | 15.3990 | C | 0 | -3.1510 | -21.6230 | 23.0440 | O | 0 | -2.5440 | -21.3280 | 20.2270 | O | 0 |
| 4.6000  | -10.8090 | 15.9400 | H | 0 | -2.8270 | -18.6440 | 26.0460 | C | 0 | -2.5600 | -20.9730 | 21.1190 | H | 0 |
| 3.7000  | -10.0670 | 14.4470 | H | 0 | -2.0620 | -19.4520 | 26.4110 | O | 0 | -2.0030 | -20.6900 | 17.9160 | C | 0 |
| 2.9580  | -10.1590 | 16.0910 | H | 0 | -2.3600 | -17.3890 | 25.7920 | N | 0 | -2.2900 | -21.6870 | 17.6170 | H | 0 |
| 3.2930  | -12.8130 | 16.2830 | O | 0 | -3.0530 | -16.7810 | 25.3790 | H | 0 | -1.5510 | -19.7240 | 17.0330 | C | 0 |
| 2.8820  | -13.6800 | 16.2490 | H | 0 | -1.1560 | -16.7130 | 26.1740 | C | 0 | -1.3530 | -20.0510 | 16.0230 | H | 0 |
| 0.6390  | -11.5610 | 15.6130 | C | 0 | -1.3200 | -15.6490 | 25.9990 | H | 0 | 1.4740  | -16.3070 | 15.6030 | C | 0 |
| 0.1560  | -10.4010 | 15.6320 | O | 0 | -0.8940 | -16.8910 | 27.7110 | C | 0 | 1.8150  | -15.1100 | 15.7470 | O | 0 |
| 0.3500  | -12.4670 | 16.5530 | N | 0 | -0.4180 | -17.8680 | 27.8000 | H | 0 | 1.6020  | -16.8440 | 14.3900 | N | 0 |
| 0.7840  | -13.3780 | 16.6080 | H | 0 | -0.1890 | -16.1420 | 28.0720 | H | 0 | 1.2770  | -17.8000 | 14.3700 | H | 0 |
| -0.6260 | -12.1480 | 17.5630 | C | 0 | -2.1580 | -16.7910 | 28.6750 | C | 0 | 1.7360  | -16.1740 | 13.1140 | C | 0 |
| -0.4950 | -11.1350 | 17.9410 | H | 0 | -2.9020 | -17.5610 | 28.4710 | H | 0 | 1.4710  | -15.1400 | 13.3340 | H | 0 |
| -2.1190 | -12.2950 | 17.0210 | C | 0 | -1.8620 | -17.1810 | 29.6490 | H | 0 | 3.1570  | -16.2050 | 12.5670 | C | 0 |
| -2.7610 | -11.9460 | 17.8290 | H | 0 | -3.0010 | -15.5010 | 28.7820 | C | 0 | 3.2290  | -15.7220 | 11.5930 | H | 0 |
| -2.2070 | -11.6900 | 16.1180 | H | 0 | -2.3420 | -14.6370 | 28.8710 | H | 0 | 4.1050  | -15.3520 | 13.4790 | C | 0 |
| -2.5600 | -13.7210 | 16.5780 | C | 0 | -3.4340 | -15.3970 | 27.7870 | H | 0 | 3.7450  | -14.3250 | 13.5210 | H | 0 |
| -2.4260 | -14.0710 | 15.1950 | C | 0 | -4.1070 | -15.3870 | 29.7780 | C | 0 | 4.3630  | -15.9620 | 14.3450 | H | 0 |
| -1.8150 | -13.4760 | 14.5330 | H | 0 | -3.6980 | -15.6050 | 30.7650 | H | 0 | 5.0620  | -15.4160 | 12.9600 | H | 0 |
| -2.8490 | -15.2830 | 14.7180 | C | 0 | -4.5900 | -14.4120 | 29.8360 | H | 0 | 3.7430  | -17.5880 | 12.3650 | C | 0 |
| -2.7130 | -15.6030 | 13.6960 | H | 0 | -5.1410 | -16.3560 | 29.4510 | N | 0 | 4.8050  | -17.7080 | 12.1470 | H | 0 |
| -3.5430 | -16.1830 | 15.5930 | C | 0 | -5.9870 | -16.1450 | 29.9600 | H | 0 | 3.5110  | -18.1600 | 13.2630 | H | 0 |
| -3.8720 | -17.1130 | 15.1530 | H | 0 | -5.4150 | -16.4260 | 28.4820 | H | 0 | 3.1520  | -17.9570 | 11.5270 | H | 0 |
| -3.7600 | -15.7860 | 16.9190 | C | 0 | -4.8230 | -17.2750 | 29.7240 | H | 0 | 0.6510  | -16.6310 | 12.0970 | C | 0 |
| -4.2590 | -16.4650 | 17.5950 | H | 0 | 0.0460  | -17.0610 | 25.2260 | C | 0 | 0.1040  | -17.7150 | 12.3230 | O | 0 |
| -3.1960 | -14.5980 | 17.4370 | C | 0 | 1.1320  | -16.4750 | 25.4440 | O | 0 | 0.2740  | -15.8680 | 11.0250 | N | 0 |
| -3.4800 | -14.2940 | 18.4340 | H | 0 | -0.1140 | -17.9670 | 24.2760 | N | 0 | 0.7540  | -14.9800 | 11.0640 | H | 0 |
| -0.3950 | -13.0270 | 18.8020 | C | 0 | -1.0130 | -18.4230 | 24.2220 | H | 0 | -0.7000 | -16.2090 | 10.1040 | C | 0 |
| 0.3220  | -14.0510 | 18.7370 | O | 0 | 0.8130  | -18.4130 | 23.2360 | C | 0 | -0.7580 | -17.2790 | 9.9040  | H | 0 |
| -0.9370 | -12.6630 | 19.9480 | N | 0 | 1.7740  | -18.4360 | 23.7500 | H | 0 | -2.0680 | -15.9470 | 10.7060 | C | 0 |
| -1.5200 | -11.8390 | 19.9540 | H | 0 | 0.3850  | -19.8790 | 22.8450 | C | 0 | -2.3160 | -16.6330 | 11.5160 | H | 0 |
| -0.9510 | -13.5230 | 21.0810 | C | 0 | 0.1400  | -20.4080 | 23.7650 | H | 0 | -2.2200 | -14.9330 | 11.0770 | H | 0 |
| -0.4990 | -14.4680 | 20.7780 | H | 0 | -0.5790 | -19.7160 | 22.3630 | H | 0 | -2.9050 | -15.9930 | 10.0090 | H | 0 |
| -0.4080 | -12.9920 | 22.4000 | C | 0 | 1.3560  | -20.6610 | 21.9240 | C | 0 | -0.4980 | -15.4410 | 8.7740  | C | 0 |
| -0.9180 | -12.0420 | 22.5610 | H | 0 | 1.2630  | -20.2420 | 20.9220 | H | 0 | 0.2720  | -14.5140 | 8.7910  | O | 0 |
| -0.5530 | -13.7570 | 23.1620 | H | 0 | 2.3960  | -20.6580 | 22.2500 | H | 0 | -0.9130 | -15.9790 | 7.5770  | N | 0 |

|         |          |         |   |   |         |          |          |   |   |         |          |          |   |   |
|---------|----------|---------|---|---|---------|----------|----------|---|---|---------|----------|----------|---|---|
| -1.4390 | -16.8320 | 7.7020  | H | 0 | -2.5690 | -10.1290 | -8.7040  | N | 0 | -1.4510 | -14.3170 | -15.8130 | N | 0 |
| -0.7730 | -15.3670 | 6.2120  | C | 0 | -3.4070 | -9.6110  | -8.4820  | H | 0 | -0.6000 | -13.7740 | -15.8370 | H | 0 |
| -0.8220 | -14.2970 | 6.4140  | H | 0 | -1.5690 | -9.1710  | -9.1450  | C | 0 | -1.3390 | -15.6720 | -16.4500 | C | 0 |
| 0.5380  | -15.7430 | 5.5060  | C | 0 | -1.9140 | -8.2080  | -8.7680  | H | 0 | -1.8240 | -15.6390 | -17.4260 | H | 0 |
| 1.3390  | -15.5530 | 6.2200  | H | 0 | -0.6280 | -9.5070  | -8.7100  | H | 0 | 0.1570  | -15.8620 | -16.8530 | C | 0 |
| 0.5370  | -17.2770 | 5.1920  | C | 0 | -1.5820 | -9.0530  | -10.6720 | C | 0 | 0.2520  | -16.8310 | -17.3450 | H | 0 |
| 0.3970  | -17.8870 | 6.0840  | H | 0 | -1.6970 | -10.0700 | -11.3600 | O | 0 | 0.5200  | -15.1450 | -17.5900 | H | 0 |
| -0.2770 | -17.4660 | 4.4920  | H | 0 | -1.3290 | -7.8270  | -11.1420 | N | 0 | 0.8010  | -15.8070 | -15.9760 | H | 0 |
| 1.4880  | -17.4620 | 4.6910  | H | 0 | -1.2450 | -7.0220  | -10.5390 | H | 0 | -1.8170 | -16.8380 | -15.6040 | C | 0 |
| 0.7720  | -14.7820 | 4.3160  | C | 0 | -1.0940 | -7.6320  | -12.5150 | C | 0 | -2.3020 | -17.7900 | -16.2180 | O | 0 |
| 0.6500  | -13.7320 | 4.5830  | H | 0 | -2.0460 | -7.6670  | -13.0440 | H | 0 | -1.9370 | -16.8130 | -14.2960 | N | 0 |
| 1.8200  | -14.8510 | 4.0240  | H | 0 | -0.5950 | -6.1820  | -12.5760 | C | 0 | -1.7520 | -15.9400 | -13.8240 | H | 0 |
| 0.1530  | -15.0850 | 3.4710  | H | 0 | -1.3130 | -5.4790  | -12.1550 | H | 0 | -2.2690 | -17.9480 | -13.4200 | C | 0 |
| -1.9920 | -15.6880 | 5.2850  | C | 0 | 0.3310  | -6.0700  | -12.0110 | H | 0 | -2.6170 | -18.7380 | -14.0850 | H | 0 |
| -2.5400 | -16.7750 | 5.4400  | O | 0 | -0.4080 | -5.5070  | -13.8730 | C | 0 | -0.9580 | -18.4380 | -12.8590 | C | 0 |
| -2.4090 | -14.7280 | 4.4340  | N | 0 | -0.7890 | -5.9960  | -15.0660 | C | 0 | -0.1930 | -18.5370 | -13.6290 | H | 0 |
| -1.9040 | -13.8560 | 4.3610  | H | 0 | -1.3080 | -6.9370  | -15.1710 | H | 0 | -0.3620 | -17.4250 | -11.8550 | C | 0 |
| -3.3920 | -15.0760 | 3.3480  | C | 0 | -0.5290 | -5.0510  | -16.0350 | N | 0 | 0.0130  | -16.5320 | -12.3540 | H | 0 |
| -4.1670 | -15.7090 | 3.7800  | H | 0 | -0.6010 | -5.2560  | -17.0210 | H | 0 | -1.0770 | -17.0110 | -11.1440 | H | 0 |
| -3.9190 | -13.7420 | 2.8260  | C | 0 | -0.0700 | -3.8460  | -15.5340 | C | 0 | 0.5140  | -17.8460 | -11.3620 | H | 0 |
| -3.1060 | -13.0330 | 2.6710  | H | 0 | 0.5140  | -2.6210  | -16.0850 | C | 0 | -1.1620 | -19.7840 | -12.1460 | C | 0 |
| -4.4340 | -13.9260 | 1.8830  | H | 0 | 0.5410  | -2.3570  | -17.1320 | H | 0 | -1.5850 | -20.5210 | -12.8300 | H | 0 |
| -4.9040 | -12.9450 | 3.8140  | C | 0 | 0.9050  | -1.6100  | -15.2580 | C | 0 | -0.3050 | -20.2460 | -11.6560 | H | 0 |
| -5.1930 | -13.3580 | 5.1150  | C | 0 | 1.3080  | -0.6820  | -15.6340 | H | 0 | -1.9420 | -19.6590 | -11.3960 | H | 0 |
| -4.7050 | -14.1850 | 5.6090  | H | 0 | 0.8220  | -1.8030  | -13.8850 | C | 0 | -3.4530 | -17.6600 | -12.4690 | C | 0 |
| -6.2290 | -12.7720 | 5.8880  | C | 0 | 1.2630  | -1.0510  | -13.2470 | H | 0 | -4.3620 | -18.5060 | -12.2620 | O | 0 |
| -6.3800 | -13.1460 | 6.8900  | H | 0 | 0.5040  | -3.0490  | -13.3770 | C | 0 | -3.5630 | -16.4450 | -11.9770 | N | 0 |
| -7.0430 | -11.7650 | 5.3800  | C | 0 | 0.3460  | -3.1650  | -12.3140 | H | 0 | -2.8130 | -15.7970 | -12.1740 | H | 0 |
| -8.0300 | -11.2360 | 6.2110  | O | 0 | 0.0250  | -4.1380  | -14.1250 | C | 0 | -4.7530 | -18.8920 | -11.3370 | C | 0 |
| -8.3450 | -10.3960 | 5.8700  | H | 0 | -0.0680 | -8.6230  | -13.1460 | C | 0 | -4.9540 | -16.4780 | -10.4400 | H | 0 |
| -6.8310 | -11.3600 | 4.0600  | C | 0 | -0.3070 | -9.0010  | -14.2950 | O | 0 | -4.4390 | -14.4250 | -10.9690 | C | 0 |
| -7.4290 | -10.5360 | 3.7020  | H | 0 | 1.1050  | -8.8910  | -12.5560 | N | 0 | -5.2480 | -14.0200 | -10.3620 | H | 0 |
| -5.7360 | -11.9150 | 3.3340  | C | 0 | 1.2440  | -8.4510  | -11.6570 | H | 0 | -3.5080 | -14.3390 | -10.4070 | H | 0 |
| -5.6130 | -11.6380 | 2.2970  | H | 0 | 2.1890  | -9.8080  | -12.9180 | C | 0 | -4.3960 | -13.7230 | -11.8020 | H | 0 |
| -2.6630 | -15.8310 | 2.2090  | C | 0 | 2.4560  | -9.7300  | -13.9720 | H | 0 | -5.9620 | -16.0020 | -12.2820 | C | 0 |
| -1.5710 | -15.4580 | 1.7950  | O | 0 | 3.2950  | -9.6280  | -11.8960 | C | 0 | -7.1220 | -16.0550 | -11.8810 | O | 0 |
| -3.2120 | -16.8790 | 1.6400  | N | 0 | 3.6190  | -8.5890  | -11.8400 | H | 0 | -5.7190 | -15.9340 | -13.5260 | N | 0 |
| -4.0840 | -17.1420 | 2.0770  | H | 0 | 2.9040  | -9.9910  | -10.9460 | H | 0 | -4.7740 | -16.0060 | -13.8760 | H | 0 |
| -2.7360 | -17.5940 | 0.4490  | C | 0 | 4.5750  | -10.4390 | -12.2020 | C | 0 | -6.7460 | -15.7720 | -14.6040 | C | 0 |
| -1.9760 | -16.9820 | -0.0370 | H | 0 | 4.6240  | -11.7950 | -11.8870 | C | 0 | -7.6620 | -16.1260 | -14.1290 | H | 0 |
| -2.2650 | -18.9980 | 0.8660  | C | 0 | 3.7550  | -12.2430 | -11.4280 | H | 0 | -6.9200 | -14.2170 | -14.9850 | C | 0 |
| -1.3480 | -18.9430 | 1.4530  | H | 0 | 5.7520  | -12.5570 | -12.2500 | C | 0 | -6.1740 | -13.9190 | -15.7220 | H | 0 |
| -2.9390 | -19.4030 | 1.6210  | H | 0 | 5.8100  | -13.6130 | -12.0280 | H | 0 | -7.8640 | -14.1300 | -15.5230 | H | 0 |
| -2.0590 | -19.9150 | -0.1800 | O | 0 | 6.8330  | -11.8540 | -12.9280 | C | 0 | -6.7550 | -13.2470 | -13.8520 | C | 0 |
| -1.3820 | -19.4900 | -0.7120 | H | 0 | 7.7430  | -12.3850 | -13.1670 | H | 0 | -7.3650 | -13.6610 | -13.0500 | H | 0 |
| -3.8730 | -17.6440 | -0.5770 | C | 0 | 6.8100  | -10.4350 | -12.9880 | C | 0 | -5.7040 | -13.2170 | -13.5670 | H | 0 |
| -4.9190 | -18.3030 | -0.4000 | O | 0 | 7.6720  | -9.9070  | -13.3700 | H | 0 | -7.3110 | -11.8710 | -14.2590 | C | 0 |
| -3.6700 | -16.9230 | -1.6640 | N | 0 | 5.6540  | -9.7350  | -12.7070 | C | 0 | -8.2690 | -11.6630 | -15.0530 | O | 0 |
| -2.7660 | -16.4820 | -1.7580 | H | 0 | 5.5060  | -8.6740  | -12.8460 | H | 0 | -6.7130 | -10.8190 | -13.7610 | N | 0 |
| -4.5220 | -16.8020 | -2.7370 | C | 0 | 1.5980  | -11.2330 | -12.9270 | C | 0 | -7.1400 | -9.9690  | -14.1010 | H | 0 |
| -4.6360 | -17.7760 | -3.2140 | H | 0 | 1.8650  | -11.9310 | -13.8800 | O | 0 | -5.9060 | -10.8700 | -13.1550 | H | 0 |
| -5.5530 | -16.5700 | -2.4730 | H | 0 | 0.8650  | -11.6760 | -11.9480 | N | 0 | -6.4460 | -16.6090 | -15.9100 | C | 0 |
| -4.1460 | -15.7170 | -3.7360 | C | 0 | 0.7440  | -11.0240 | -11.1860 | H | 0 | -7.3300 | -16.6910 | -16.7470 | O | 0 |
| -4.5260 | -14.5940 | -3.6610 | O | 0 | 0.1870  | -12.9480 | -11.8590 | C | 0 | -5.3770 | -17.3110 | -16.0140 | N | 0 |
| -3.6370 | -16.2220 | -4.8560 | N | 0 | 0.8890  | -13.7810 | -11.8800 | H | 0 | -4.6680 | -17.3040 | -15.2950 | H | 0 |
| -3.4190 | -17.2080 | -4.8820 | H | 0 | -0.1600 | -13.0050 | -10.8270 | H | 0 | -5.1700 | -18.3200 | -17.1130 | C | 0 |
| -2.8700 | -15.4970 | -5.9410 | C | 0 | -0.9660 | -13.2660 | -12.7290 | C | 0 | -4.1670 | -18.7130 | -16.9460 | H | 0 |
| -1.9370 | -15.0680 | -5.5750 | H | 0 | -1.5950 | -14.3540 | -12.6070 | O | 0 | -6.2280 | -19.5130 | -16.9930 | C | 0 |
| -2.2940 | -16.5310 | -7.0070 | C | 0 | -1.3160 | -12.3940 | -13.6840 | N | 0 | -7.1960 | -19.0890 | -17.2620 | H | 0 |
| -1.7510 | -17.3140 | -6.4780 | H | 0 | -0.9270 | -11.4620 | -13.6580 | H | 0 | -5.9900 | -20.3170 | -17.6900 | H | 0 |
| -3.3970 | -17.2680 | -7.8470 | C | 0 | -2.5140 | -12.4780 | -14.6220 | C | 0 | -6.1110 | -20.3190 | -15.7420 | C | 0 |
| -4.0380 | -17.8630 | -7.1970 | H | 0 | -3.3480 | -12.5530 | -13.9250 | H | 0 | -4.9970 | -20.6350 | -15.3550 | O | 0 |
| -3.9980 | -16.5320 | -8.3820 | H | 0 | -2.5920 | -11.1790 | -15.4490 | C | 0 | -7.1970 | -20.6310 | -15.0020 | N | 0 |
| -2.9410 | -17.9110 | -8.6000 | H | 0 | -2.4780 | -10.3640 | -14.7340 | H | 0 | -6.9920 | -21.1790 | -14.1790 | H | 0 |
| -1.3830 | -15.9020 | -8.1630 | C | 0 | -1.3170 | -11.0270 | -16.3480 | C | 0 | -8.1000 | -20.3910 | -15.3850 | H | 0 |
| -1.9830 | -15.1930 | -8.7330 | H | 0 | -1.5380 | -11.6710 | -17.1990 | H | 0 | -5.1510 | -17.6330 | -18.5130 | C | 0 |
| -0.5380 | -15.3530 | -7.7480 | H | 0 | -1.1650 | -10.0050 | -16.6960 | H | 0 | -5.5200 | -18.2710 | -19.5680 | O | 0 |
| -0.9950 | -16.6700 | -8.8310 | H | 0 | -0.3870 | -11.3760 | -15.8990 | H | 0 | -4.5090 | -16.4540 | -18.5640 | N | 0 |
| -3.6780 | -14.3510 | -6.5790 | C | 0 | -3.9700 | -11.0340 | -15.9950 | C | 0 | -4.1020 | -16.0780 | -17.7190 | H | 0 |
| -4.9330 | -14.4840 | -6.6720 | O | 0 | -4.1560 | -11.9270 | -16.5910 | H | 0 | -3.9850 | -16.0080 | -19.8870 | C | 0 |
| -3.0470 | -13.2770 | -6.8830 | N | 0 | -4.7030 | -11.0270 | -15.1880 | H | 0 | -4.8490 | -15.9380 | -20.5480 | H | 0 |
| -2.0500 | -13.2830 | -6.7220 | H | 0 | -4.1150 | -9.9010  | -16.9700 | C | 0 | -3.6210 | -14.5650 | -19.7330 | C | 0 |
| -3.5770 | -12.1650 | -7.7330 | C | 0 | -3.9720 | -8.9290  | -16.4980 | H | 0 | -2.9380 | -14.5140 | -18.8840 | H | 0 |
| -4.2430 | -12.5300 | -8.5140 | H | 0 | -3.4270 | -9.9960  | -17.8090 | H | 0 | -3.0990 | -14.2370 | -20.6320 | H | 0 |
| -4.0480 | -11.5080 | -7.0020 | H | 0 | -5.1490 | -10.0640 | -17.2740 | H | 0 | -4.8030 | -13.5950 | -19.5950 | C | 0 |
| -2.4650 | -11.4540 | -8.5080 | C | 0 | -2.5870 | -13.7530 | -15.4310 | C | 0 | -5.3940 | -13.6520 | -18.6810 | H | 0 |
| -1.4910 | -12.0850 | -8.8320 | O | 0 | -3.6850 | -14.3580 | -15.4860 | O | 0 | -4.1590 | -12.1690 | -19.5820 | C | 0 |

|         |          |          |   |   |         |          |          |   |   |         |          |          |   |   |
|---------|----------|----------|---|---|---------|----------|----------|---|---|---------|----------|----------|---|---|
| -4.9270 | -11.4420 | -19.3180 | H | 0 | 1.2230  | -7.5010  | -25.1680 | C | 0 | 1.0690  | -11.0190 | -21.6880 | H | 0 |
| -3.4020 | -12.1480 | -18.7980 | H | 0 | 1.9950  | -6.9340  | -24.6490 | H | 0 | 1.0440  | -13.1530 | -21.7460 | C | 0 |
| -3.6940 | -11.9300 | -20.5390 | H | 0 | 1.1270  | -6.8290  | -26.5450 | C | 0 | 0.1880  | -13.2560 | -22.4120 | H | 0 |
| -5.8380 | -13.5970 | -20.7700 | C | 0 | 0.5100  | -7.3050  | -27.3070 | H | 0 | 2.0170  | -13.2110 | -22.2350 | H | 0 |
| -6.4650 | -12.7100 | -20.6780 | H | 0 | 0.5750  | -5.8930  | -26.4660 | H | 0 | 1.0090  | -14.0510 | -21.1290 | H | 0 |
| -5.2870 | -13.4460 | -21.6980 | H | 0 | 2.4320  | -6.3800  | -27.1860 | C | 0 | -0.5230 | -11.6620 | -20.3250 | C | 0 |
| -6.2760 | -14.5950 | -20.7570 | H | 0 | 3.2010  | -7.2850  | -28.0160 | C | 0 | -0.7160 | -12.5020 | -19.6570 | H | 0 |
| -2.7950 | -16.8060 | -20.4750 | C | 0 | 2.8310  | -8.2910  | -28.1520 | H | 0 | -0.6500 | -10.7120 | -19.8060 | H | 0 |
| -1.8500 | -17.2170 | -19.8320 | O | 0 | 4.4360  | -6.8480  | -28.5550 | C | 0 | -1.1530 | -11.7090 | -21.2130 | H | 0 |
| -2.7670 | -16.9890 | -21.7660 | N | 0 | 4.8860  | -7.4940  | -29.2930 | H | 0 | 3.3360  | -12.0740 | -20.1250 | C | 0 |
| -3.7990 | -16.7360 | -22.7960 | C | 0 | 4.9510  | -5.5380  | -28.3080 | C | 0 | 3.8070  | -13.2130 | -19.7960 | O | 0 |
| -4.0230 | -15.6770 | -22.9220 | H | 0 | 6.2710  | -5.3360  | -28.7170 | O | 0 | 4.0570  | -11.2050 | -20.7940 | N | 0 |
| -4.7320 | -17.2400 | -22.5410 | H | 0 | 6.5320  | -5.8680  | -29.4720 | H | 0 | 3.6160  | -10.3180 | -20.9930 | H | 0 |
| -3.4020 | -17.3750 | -24.1270 | C | 0 | 4.2460  | -4.7010  | -27.3790 | C | 0 | 5.4500  | -11.4150 | -21.2460 | C | 0 |
| -2.7820 | -16.7080 | -24.7260 | H | 0 | 4.6290  | -3.7550  | -27.0280 | H | 0 | 5.4250  | -12.1670 | -22.0340 | H | 0 |
| -4.2490 | -17.7560 | -24.6970 | H | 0 | 2.9370  | -5.0850  | -26.9110 | C | 0 | 5.9360  | -10.5100 | -21.6100 | H | 0 |
| -2.4260 | -18.4560 | -23.6310 | C | 0 | 2.4220  | -4.4060  | -26.2490 | H | 0 | 6.3270  | -11.8980 | -20.1680 | C | 0 |
| -1.7090 | -18.6590 | -24.4260 | H | 0 | -0.0750 | -7.4050  | -24.3910 | C | 0 | 6.7820  | -13.0130 | -20.1480 | O | 0 |
| -2.8680 | -19.4150 | -23.3620 | H | 0 | -0.5000 | -6.2970  | -24.1800 | O | 0 | 6.4570  | -11.0110 | -19.2290 | N | 0 |
| -1.6850 | -17.7820 | -22.4290 | C | 0 | -0.6980 | -8.5030  | -23.9340 | N | 0 | 6.0160  | -10.1110 | -19.3540 | H | 0 |
| -1.3170 | -18.5650 | -21.7660 | H | 0 | -0.2830 | -9.4080  | -24.1020 | H | 0 | 7.1420  | -11.2760 | -17.9890 | C | 0 |
| -0.5350 | -17.0550 | -23.0120 | C | 0 | -1.8980 | -8.5780  | -23.1080 | C | 0 | 8.0930  | -11.7320 | -18.2630 | H | 0 |
| -0.5680 | -15.8510 | -23.1370 | O | 0 | -2.4940 | -7.7510  | -23.4950 | H | 0 | 7.5440  | -9.9150  | -17.2590 | C | 0 |
| 0.5550  | -17.7190 | -23.3290 | N | 0 | -2.6580 | -9.8440  | -23.4900 | C | 0 | 8.0010  | -9.2030  | -17.9470 | H | 0 |
| 0.7640  | -19.1510 | -23.2550 | C | 0 | -3.5540 | -9.9320  | -22.8750 | H | 0 | 6.4130  | -9.2780  | -16.3630 | C | 0 |
| -0.0290 | -19.7180 | -23.7430 | H | 0 | -2.9810 | -9.8250  | -24.5310 | H | 0 | 6.8220  | -8.4270  | -15.8170 | H | 0 |
| 0.9220  | -19.4060 | -22.2070 | H | 0 | -2.0350 | -10.7290 | -23.3580 | H | 0 | 5.5080  | -9.0250  | -16.9140 | H | 0 |
| 1.9970  | -19.4310 | -24.0780 | C | 0 | -1.6540 | -8.3790  | -21.6560 | C | 0 | 6.2180  | -10.0670 | -15.6370 | H | 0 |
| 1.7440  | -19.6640 | -25.1120 | H | 0 | -0.4600 | -8.5060  | -21.1540 | O | 0 | 8.7230  | -10.2170 | -16.3860 | C | 0 |
| 2.5380  | -20.2820 | -23.6640 | H | 0 | -2.7450 | -7.9690  | -20.9730 | N | 0 | 9.4820  | -10.5990 | -17.0690 | H | 0 |
| 2.7410  | -18.0910 | -23.9970 | C | 0 | -3.6350 | -7.9370  | -21.4500 | H | 0 | 9.1050  | -9.3940  | -15.7820 | H | 0 |
| 3.5330  | -17.9570 | -24.7330 | H | 0 | -2.8340 | -7.5490  | -19.5160 | C | 0 | 8.6140  | -11.0450 | -15.6850 | H | 0 |
| 3.2830  | -18.0070 | -23.0540 | H | 0 | -3.8540 | -7.2390  | -19.2870 | H | 0 | 6.5020  | -12.4090 | -17.1150 | C | 0 |
| 1.6920  | -17.0410 | -23.9610 | C | 0 | -2.6350 | -8.3390  | -18.7920 | H | 0 | 7.2850  | -13.1600 | -16.5230 | O | 0 |
| 1.8130  | -16.1730 | -23.3120 | H | 0 | -1.9600 | -6.3210  | -19.2690 | C | 0 | 5.2160  | -12.5990 | -17.0820 | N | 0 |
| 1.3600  | -16.5170 | -25.3760 | C | 0 | -1.1510 | -6.3100  | -18.3730 | O | 0 | 4.5480  | -12.0060 | -17.5540 | H | 0 |
| 2.2310  | -16.0050 | -26.0210 | O | 0 | -1.9170 | -5.4880  | -20.3170 | N | 0 | 4.6830  | -13.8160 | -16.3880 | C | 0 |
| 0.1160  | -16.7510 | -25.8480 | N | 0 | -2.4930 | -5.6770  | -21.1250 | H | 0 | 4.7950  | -13.6380 | -15.3180 | H | 0 |
| -0.5310 | -17.3860 | -25.4010 | H | 0 | -0.9610 | -4.3050  | -20.3560 | C | 0 | 3.1530  | -13.8560 | -16.5430 | C | 0 |
| -0.2200 | -16.5090 | -27.2220 | C | 0 | -1.1270 | -3.7870  | -21.3010 | H | 0 | 2.8820  | -14.7230 | -17.1470 | H | 0 |
| 0.5270  | -17.0740 | -27.7800 | H | 0 | -1.3960 | -3.1730  | -19.3880 | C | 0 | 2.7370  | -13.9360 | -15.5390 | H | 0 |
| -1.6300 | -17.0240 | -27.5840 | C | 0 | -1.9640 | -3.5820  | -18.5520 | H | 0 | 2.8240  | -12.9740 | -17.0930 | H | 0 |
| -2.3480 | -16.3840 | -27.0720 | H | 0 | -0.4790 | -2.7300  | -18.9980 | H | 0 | 5.3060  | -15.1960 | -16.8240 | C | 0 |
| -1.8650 | -16.7750 | -28.6190 | H | 0 | -2.1040 | -1.9820  | -20.0710 | C | 0 | 5.6790  | -16.0170 | -15.9460 | O | 0 |
| -2.0080 | -18.5060 | -27.3050 | C | 0 | -2.8860 | -2.3830  | -20.7170 | H | 0 | 5.2490  | -15.4820 | -18.1280 | N | 0 |
| -3.2230 | -18.8180 | -27.5970 | O | 0 | -2.8350 | -1.2820  | -18.9300 | C | 0 | 4.7630  | -14.8300 | -18.7270 | H | 0 |
| -1.1310 | -19.3480 | -26.8940 | O | 0 | -3.5060 | -0.5130  | -19.3110 | H | 0 | 5.9600  | -16.5700 | -18.8200 | C | 0 |
| -0.0830 | -15.0260 | -27.5980 | C | 0 | -3.4790 | -1.9340  | -18.3400 | H | 0 | 5.6950  | -17.4340 | -18.2110 | H | 0 |
| -0.0860 | -14.7570 | -28.8200 | O | 0 | -2.2260 | -0.6090  | -18.3260 | H | 0 | 5.3140  | -16.8240 | -20.1440 | C | 0 |
| -0.0130 | -14.1320 | -26.7230 | N | 0 | -1.2860 | -1.0090  | -20.8590 | C | 0 | 5.3560  | -15.8570 | -20.6460 | H | 0 |
| 0.2910  | -14.3870 | -25.7940 | H | 0 | -1.1200 | -1.3800  | -21.8700 | H | 0 | 5.8770  | -17.5220 | -20.7640 | H | 0 |
| 0.1070  | -12.6630 | -26.9170 | C | 0 | -1.9240 | -0.1420  | -21.0300 | H | 0 | 3.8100  | -17.3340 | -20.1000 | C | 0 |
| 0.5990  | -12.2730 | -27.8080 | H | 0 | -0.3510 | -0.7230  | -20.3770 | H | 0 | 2.7060  | -16.4250 | -20.0610 | C | 0 |
| -1.3270 | -12.1500 | -27.1530 | C | 0 | 0.5500  | -4.7240  | -20.3330 | C | 0 | 2.8940  | -15.3670 | -20.1750 | H | 0 |
| -1.7250 | -12.6220 | -28.0510 | H | 0 | 1.4290  | -3.9520  | -19.9380 | O | 0 | 1.4410  | -16.9750 | -19.9770 | C | 0 |
| -1.9210 | -12.4170 | -26.2790 | H | 0 | 0.8710  | -5.9320  | -20.9340 | N | 0 | 0.5380  | -16.3990 | -20.1180 | H | 0 |
| -1.4040 | -10.6460 | -27.3300 | C | 0 | 0.0900  | -6.4370  | -21.3280 | H | 0 | 1.2910  | -18.3880 | -19.7500 | C | 0 |
| -0.3360 | -10.0640 | -27.3690 | O | 0 | 2.2840  | -6.2660  | -21.2310 | C | 0 | 0.0350  | -18.8650 | -19.5960 | O | 0 |
| -2.5560 | -10.1120 | -27.3380 | O | 0 | 2.2740  | -6.9900  | -22.0460 | H | 0 | -0.6430 | -18.2240 | -19.8230 | H | 0 |
| 0.7990  | -12.0390 | -25.6480 | C | 0 | 2.8050  | -5.3520  | -21.5160 | H | 0 | 2.3790  | -19.3070 | -19.9070 | C | 0 |
| 0.1540  | -11.9120 | -24.6560 | O | 0 | 2.9470  | -7.0040  | -20.1020 | C | 0 | 2.2870  | -20.3720 | -19.7510 | H | 0 |
| 2.1420  | -11.7310 | -25.7000 | N | 0 | 4.1390  | -7.2430  | -20.2500 | O | 0 | 3.6330  | -18.7360 | -20.0820 | C | 0 |
| 2.9830  | -11.8330 | -26.9420 | C | 0 | 2.2180  | -7.4400  | -19.0160 | N | 0 | 4.4710  | -19.4070 | -20.2050 | H | 0 |
| 2.5230  | -11.4630 | -27.8580 | H | 0 | 1.3100  | -7.0360  | -18.8400 | H | 0 | 7.4960  | -16.4030 | -18.9030 | C | 0 |
| 3.3500  | -12.8320 | -27.1760 | H | 0 | 2.7390  | -8.2630  | -17.9670 | C | 0 | 8.1120  | -17.4610 | -18.8420 | O | 0 |
| 4.1680  | -10.9320 | -26.7600 | C | 0 | 3.7570  | -7.9380  | -17.7510 | H | 0 | 8.1200  | -15.1820 | -18.7550 | N | 0 |
| 3.9430  | -9.8990  | -27.0270 | H | 0 | 2.0390  | -8.0020  | -16.6480 | C | 0 | 7.4780  | -14.4020 | -18.7710 | H | 0 |
| 5.0240  | -11.3530 | -27.2860 | H | 0 | 0.9520  | -8.0790  | -16.6880 | H | 0 | 9.6120  | -15.0950 | -18.6510 | C | 0 |
| 4.4210  | -11.0710 | -25.2500 | C | 0 | 2.4770  | -8.6680  | -15.9050 | H | 0 | 10.0440 | -15.7800 | -19.3800 | H | 0 |
| 4.9660  | -10.2480 | -24.7890 | H | 0 | 2.2830  | -7.0280  | -16.2240 | H | 0 | 10.0950 | -13.6920 | -18.8860 | C | 0 |
| 4.7840  | -12.0760 | -25.0330 | H | 0 | 2.6210  | -9.7120  | -18.3510 | C | 0 | 9.4870  | -13.1910 | -19.6390 | H | 0 |
| 2.9690  | -11.0390 | -24.7040 | C | 0 | 3.4290  | -10.4990 | -17.7520 | O | 0 | 9.9330  | -13.0960 | -17.9870 | H | 0 |
| 2.9910  | -11.5970 | -23.7680 | H | 0 | 1.8430  | -10.1800 | -19.2930 | N | 0 | 11.6270 | -13.5930 | -19.2010 | C | 0 |
| 2.5660  | -9.5140  | -24.5070 | C | 0 | 1.1170  | -9.6010  | -19.6890 | H | 0 | 12.1460 | -14.2610 | -18.5140 | H | 0 |
| 3.0420  | -8.9780  | -23.5120 | O | 0 | 1.8860  | -11.6230 | -19.7440 | C | 0 | 11.8220 | -14.0290 | -20.1810 | H | 0 |
| 1.6580  | -8.8900  | -25.2980 | N | 0 | 1.6180  | -12.2340 | -18.8820 | H | 0 | 12.3310 | -12.2380 | -19.1250 | C | 0 |
| 1.0700  | -9.5070  | -25.8400 | H | 0 | 0.8870  | -11.7960 | -20.9450 | C | 0 | 11.7340 | -11.1620 | -19.0570 | O | 0 |



|         |          |          |   |   |         |          |          |   |   |         |          |         |   |   |
|---------|----------|----------|---|---|---------|----------|----------|---|---|---------|----------|---------|---|---|
| 13.6340 | -12.1970 | -19.2410 | N | 0 | 4.1140  | -22.7060 | -11.1970 | N | 0 | -7.5190 | -22.2280 | 3.1470  | H | 0 |
| 14.1060 | -11.3250 | -19.0460 | H | 0 | 4.3820  | -21.8610 | -11.6810 | H | 0 | -7.7320 | -22.1990 | 1.0330  | C | 0 |
| 14.0970 | -13.0930 | -19.1950 | H | 0 | 4.3750  | -22.8640 | -9.6870  | C | 0 | -8.8560 | -22.7360 | 1.0800  | O | 0 |
| 10.0540 | -15.6950 | -17.3400 | C | 0 | 4.8910  | -23.8170 | -9.5700  | H | 0 | -7.2960 | -21.7010 | -0.0110 | O | 0 |
| 11.0380 | -16.4670 | -17.2520 | O | 0 | 5.4550  | -21.8000 | -9.2390  | C | 0 | -6.5560 | -18.4280 | 3.3850  | C | 0 |
| 9.3240  | -15.4820 | -16.2540 | N | 0 | 5.0370  | -20.7950 | -9.1790  | H | 0 | -5.5370 | -17.7630 | 3.1310  | O | 0 |
| 8.5830  | -14.8010 | -16.3430 | H | 0 | 5.8100  | -22.1720 | -8.2780  | H | 0 | -7.1380 | -18.3410 | 4.6340  | N | 0 |
| 9.6480  | -15.9950 | -14.9350 | C | 0 | 6.3130  | -21.6990 | -9.9040  | H | 0 | -7.8470 | -19.0220 | 4.8670  | H | 0 |
| 10.7210 | -15.8680 | -14.7920 | H | 0 | 3.1920  | -22.8490 | -8.7410  | C | 0 | -6.3210 | -18.0800 | 5.7870  | C | 0 |
| 8.8560  | -15.1380 | -13.9980 | C | 0 | 3.2520  | -23.1980 | -7.5370  | O | 0 | -5.5720 | -17.3440 | 5.4950  | H | 0 |
| 7.7760  | -15.2830 | -13.9740 | H | 0 | 2.0210  | -22.5500 | -9.2840  | N | 0 | -7.2380 | -17.6930 | 6.9440  | C | 0 |
| 9.2560  | -15.2850 | -12.9940 | H | 0 | 1.9880  | -22.5720 | -10.2930 | H | 0 | -7.6500 | -16.7200 | 6.6740  | H | 0 |
| 8.9950  | -14.0810 | -14.2260 | H | 0 | 0.8830  | -22.2320 | -8.4240  | C | 0 | -7.9950 | -18.4290 | 7.2140  | H | 0 |
| 9.2050  | -17.4720 | -14.7840 | C | 0 | 0.8220  | -22.9150 | -7.5770  | H | 0 | -6.4450 | -17.4920 | 8.2520  | C | 0 |
| 9.6620  | -18.1940 | -13.9100 | O | 0 | 1.0300  | -20.8080 | -7.8260  | C | 0 | -5.8740 | -18.3880 | 8.4970  | H | 0 |
| 8.4160  | -18.0150 | -15.7340 | N | 0 | 2.1070  | -20.6500 | -7.7750  | H | 0 | -5.3740 | -16.3780 | 8.2940  | C | 0 |
| 8.2060  | -17.4090 | -16.5140 | H | 0 | 0.4550  | -19.7110 | -8.6600  | C | 0 | -5.6650 | -15.5470 | 7.6520  | H | 0 |
| 7.7860  | -19.4130 | -15.6770 | C | 0 | -0.6160 | -19.5780 | -8.5040  | H | 0 | -5.0970 | -16.1190 | 9.3160  | H | 0 |
| 7.4030  | -19.6790 | -16.6620 | H | 0 | 1.0100  | -18.8100 | -8.3980  | H | 0 | -4.4930 | -16.8750 | 7.8870  | H | 0 |
| 8.5490  | -20.1550 | -15.4400 | H | 0 | 0.5810  | -20.0230 | -9.6970  | H | 0 | -7.4080 | -17.1900 | 9.4100  | C | 0 |
| 6.6560  | -19.5220 | -14.6410 | C | 0 | 0.4270  | -20.6020 | -6.5690  | O | 0 | -7.7860 | -16.1770 | 9.2690  | H | 0 |
| 6.3060  | -20.6700 | -14.3010 | O | 0 | 0.8970  | -21.1450 | -5.9320  | H | 0 | -8.2740 | -17.8380 | 9.5430  | H | 0 |
| 6.0410  | -18.4240 | -14.1190 | N | 0 | -0.5370 | -22.4900 | -9.0890  | C | 0 | -6.8430 | -17.2350 | 10.3400 | H | 0 |
| 6.2220  | -17.5590 | -14.6080 | H | 0 | -0.6400 | -22.9000 | -10.2550 | O | 0 | -5.5030 | -19.3470 | 6.0820  | C | 0 |
| 5.1870  | -18.3390 | -12.9350 | C | 0 | -1.6540 | -22.3090 | -8.2990  | N | 0 | -5.9670 | -20.5120 | 6.1070  | O | 0 |
| 5.7710  | -18.7600 | -12.1160 | H | 0 | -1.4770 | -21.9770 | -7.3610  | H | 0 | -4.2470 | -19.1740 | 6.5440  | N | 0 |
| 4.7110  | -16.9500 | -12.4960 | C | 0 | -3.0730 | -22.5530 | -8.6700  | C | 0 | -3.7340 | -18.3290 | 6.3370  | H | 0 |
| 5.5820  | -16.3170 | -12.3270 | H | 0 | -3.3230 | -22.4390 | -9.7250  | H | 0 | -3.4820 | -20.1420 | 7.2590  | C | 0 |
| 4.1780  | -16.5400 | -13.3540 | H | 0 | -3.5270 | -23.9800 | -8.4820  | C | 0 | -4.1990 | -20.8920 | 7.5920  | H | 0 |
| 3.7350  | -16.8480 | -11.2100 | C | 0 | -2.8100 | -24.6030 | -9.0170  | H | 0 | -2.3480 | -20.6950 | 6.4150  | C | 0 |
| 2.7910  | -17.2800 | -11.5410 | H | 0 | -3.5630 | -24.4340 | -7.0290  | C | 0 | -1.7260 | -19.8550 | 6.1070  | H | 0 |
| 4.2580  | -17.4320 | -9.8450  | C | 0 | -2.5870 | -24.2550 | -6.5800  | H | 0 | -1.7210 | -21.2270 | 7.1300  | H | 0 |
| 3.5090  | -17.9270 | -9.0640  | H | 0 | -4.3900 | -23.9060 | -6.5540  | H | 0 | -2.6690 | -21.6210 | 5.1950  | C | 0 |
| 4.3190  | -18.5130 | -9.9680  | H | 0 | -3.6880 | -25.5170 | -6.9940  | H | 0 | -2.6180 | -21.2000 | 3.8270  | C | 0 |
| 5.2010  | -17.0430 | -9.4600  | H | 0 | -4.7830 | -24.1260 | -9.0660  | O | 0 | -2.3430 | -20.1580 | 3.7680  | H | 0 |
| 3.4210  | -15.4080 | -10.9510 | C | 0 | -5.0800 | -25.0130 | -8.8490  | H | 0 | -2.8800 | -22.1830 | 2.7960  | C | 0 |
| 4.2760  | -14.7980 | -10.6590 | H | 0 | -3.9740 | -21.5600 | -7.9180  | C | 0 | -2.9170 | -21.8580 | 1.7670  | H | 0 |
| 3.0400  | -15.1080 | -11.9270 | H | 0 | -3.5830 | -20.8930 | -6.9470  | O | 0 | -3.2800 | -23.4710 | 3.2100  | C | 0 |
| 2.5660  | -15.2710 | -10.2890 | H | 0 | -5.2560 | -21.2970 | -8.3530  | N | 0 | -3.6170 | -24.2800 | 2.1900  | O | 0 |
| 3.9080  | -19.3110 | -13.0620 | C | 0 | -5.5550 | -21.5720 | -9.2780  | H | 0 | -3.5990 | -23.7980 | 1.3600  | H | 0 |
| 3.5980  | -19.9210 | -12.0570 | O | 0 | -6.1450 | -20.3510 | -7.5710  | C | 0 | -3.2120 | -23.9480 | 4.5160  | C | 0 |
| 3.2640  | -19.5270 | -14.2080 | N | 0 | -5.5230 | -19.4910 | -7.3230  | H | 0 | -3.4430 | -24.9850 | 4.7110  | H | 0 |
| 3.3960  | -18.7670 | -15.4410 | C | 0 | -7.3070 | -19.9510 | -8.5390  | C | 0 | -2.9430 | -22.9680 | 5.5090  | C | 0 |
| 4.3430  | -18.9860 | -15.9350 | H | 0 | -7.6610 | -20.8600 | -9.0250  | H | 0 | -3.0380 | -23.3060 | 6.5300  | H | 0 |
| 3.4530  | -17.7080 | -15.1920 | H | 0 | -8.4930 | -19.2450 | -7.8070  | C | 0 | -2.8880 | -19.4930 | 8.5360  | C | 0 |
| 2.1670  | -19.1050 | -16.2320 | C | 0 | -9.2260 | -18.7570 | -8.4490  | H | 0 | -2.5570 | -18.2870 | 8.6040  | O | 0 |
| 2.2250  | -18.8160 | -17.2810 | H | 0 | -9.0750 | -20.0410 | -7.3430  | H | 0 | -2.7460 | -20.3120 | 9.6190  | N | 0 |
| 1.4720  | -18.3880 | -15.7930 | H | 0 | -8.1190 | -18.5540 | -7.0520  | H | 0 | -3.1610 | -21.2200 | 9.4680  | H | 0 |
| 1.8050  | -20.5000 | -15.8670 | C | 0 | -6.8600 | -18.8710 | -9.4470  | C | 0 | -2.2860 | -19.9690 | 11.0130 | C | 0 |
| 2.3430  | -21.2650 | -16.4270 | H | 0 | -6.7800 | -17.9180 | -8.9230  | H | 0 | -1.8570 | -18.9670 | 10.9930 | H | 0 |
| 0.7450  | -20.7330 | -15.9690 | H | 0 | -5.8480 | -19.0750 | -9.7950  | H | 0 | -3.4050 | -19.8150 | 12.0150 | C | 0 |
| 2.2110  | -20.5070 | -14.3340 | C | 0 | -7.5690 | -18.7630 | -10.2680 | H | 0 | -3.8570 | -20.8040 | 12.0940 | H | 0 |
| 1.3950  | -20.2300 | -13.6660 | H | 0 | -6.6210 | -21.0020 | -6.1960  | C | 0 | -3.0540 | -19.3220 | 13.4250 | C | 0 |
| 2.5350  | -21.9420 | -14.0750 | C | 0 | -6.9890 | -22.1870 | -6.1720  | O | 0 | -3.9980 | -19.0810 | 13.9140 | H | 0 |
| 1.6580  | -22.7700 | -13.8490 | O | 0 | -6.5450 | -20.1440 | -5.1540  | N | 0 | -2.5780 | -20.1680 | 13.9210 | H | 0 |
| 3.8380  | -22.2930 | -13.9740 | N | 0 | -6.2450 | -19.2140 | -5.4100  | H | 0 | -2.4130 | -18.4430 | 13.4890 | H | 0 |
| 4.5320  | -21.5900 | -14.1860 | H | 0 | -7.0310 | -20.5090 | -3.8310  | C | 0 | -4.4790 | -18.8930 | 11.3550 | C | 0 |
| 4.2840  | -23.6270 | -13.4270 | C | 0 | -7.8070 | -21.2640 | -3.9590  | H | 0 | -4.0510 | -17.9890 | 10.9230 | H | 0 |
| 3.6370  | -24.3620 | -13.9080 | H | 0 | -6.3070 | -21.0020 | -3.1820  | H | 0 | -5.0580 | -19.5230 | 10.6800 | H | 0 |
| 5.7720  | -23.9480 | -13.8140 | C | 0 | -7.4540 | -19.2970 | -3.0420  | C | 0 | -5.2190 | -18.6360 | 12.1120 | H | 0 |
| 6.4260  | -23.2930 | -13.2390 | H | 0 | -7.5150 | -18.1950 | -3.6550  | O | 0 | -1.2750 | -20.9680 | 11.5480 | C | 0 |
| 6.0700  | -24.8360 | -13.2570 | H | 0 | -7.7920 | -19.3610 | -1.7440  | N | 0 | -1.4260 | -22.1260 | 11.3460 | O | 0 |
| 6.1000  | -23.9850 | -15.3210 | C | 0 | -8.0080 | -20.2680 | -1.3560  | H | 0 | -0.2370 | -20.5520 | 12.2470 | N | 0 |
| 5.4690  | -24.7160 | -15.8260 | H | 0 | -8.2470 | -18.2180 | -0.9680  | C | 0 | -0.1340 | -19.5580 | 12.3980 | H | 0 |
| 5.8740  | -23.0200 | -15.7740 | H | 0 | -7.6510 | -17.3540 | -1.2610  | H | 0 | 0.9970  | -21.3340 | 12.6900 | C | 0 |
| 7.5830  | -24.1930 | -15.4310 | C | 0 | -9.2290 | -18.0610 | -1.4160  | H | 0 | 0.7850  | -22.3940 | 12.5530 | H | 0 |
| 8.1490  | -23.3190 | -15.1080 | H | 0 | -8.3470 | -18.4440 | 0.5360   | C | 0 | 2.0630  | -20.8810 | 11.7290 | C | 0 |
| 7.9830  | -25.0240 | -14.8500 | H | 0 | -9.3780 | -18.3590 | 1.2200   | O | 0 | 2.2730  | -19.8190 | 11.8500 | H | 0 |
| 7.8780  | -24.4490 | -16.9240 | C | 0 | -7.2120 | -18.8880 | 1.1090   | N | 0 | 2.9960  | -21.3180 | 12.0870 | H | 0 |
| 7.1620  | -25.1840 | -17.2900 | H | 0 | -6.3270 | -18.9330 | 0.6240   | H | 0 | 1.8470  | -21.2770 | 10.3040 | C | 0 |
| 7.8130  | -23.5640 | -17.5580 | H | 0 | -7.0540 | -19.5190 | 2.4420   | C | 0 | 1.2750  | -20.3290 | 9.4150  | C | 0 |
| 9.2400  | -24.9550 | -16.9340 | N | 0 | -8.0180 | -19.9000 | 2.7800   | H | 0 | 0.9600  | -19.3530 | 9.7540  | H | 0 |
| 9.7630  | -24.7170 | -16.1030 | H | 0 | -6.0830 | -20.8270 | 2.3390   | C | 0 | 0.9280  | -20.5930 | 8.0800  | C | 0 |
| 9.2410  | -25.9580 | -16.8170 | H | 0 | -5.4320 | -20.6260 | 1.4890   | H | 0 | 0.3160  | -19.9520 | 7.4630  | H | 0 |
| 9.7880  | -24.6010 | -17.7050 | H | 0 | -5.4280 | -20.7770 | 3.2090   | H | 0 | 1.2010  | -21.8170 | 7.5600  | C | 0 |
| 3.9810  | -23.7690 | -11.9840 | C | 0 | -6.9220 | -22.1330 | 2.2400   | C | 0 | 1.0440  | -21.9860 | 6.5050  | H | 0 |
| 3.5210  | -24.8240 | -11.5440 | O | 0 | -6.1070 | -22.8550 | 2.1850   | H | 0 | 1.8940  | -22.7790 | 8.3660  | C | 0 |

|         |          |          |    |   |                           |         |         |         |   |   |
|---------|----------|----------|----|---|---------------------------|---------|---------|---------|---|---|
| 2.1570  | -23.7370 | 7.9410   | H  | 0 | <b>Yb-MDH (XoxF-type)</b> | 40.7510 | 50.5630 | 61.9550 | C | 0 |
| 2.2770  | -22.5270 | 9.7030   | C  | 0 |                           | 41.0140 | 51.0650 | 61.0240 | H | 0 |
| 2.8150  | -23.3030 | 10.2270  | H  | 0 | 39.2640                   | 51.0710 | 68.8850 | N       | 0 |   |
| 1.4590  | -20.9690 | 14.0700  | C  | 0 | 40.0210                   | 51.6500 | 69.2180 | H       | 0 |   |
| 1.2700  | -19.8490 | 14.5210  | O  | 0 | 39.4110                   | 50.2020 | 69.3780 | H       | 0 |   |
| 1.9870  | -21.9490 | 14.7530  | N  | 0 | 38.3580                   | 51.5080 | 68.9760 | H       | 0 |   |
| 2.1120  | -22.7880 | 14.2050  | H  | 0 | 39.4630                   | 50.9430 | 67.4440 | C       | 0 |   |
| 2.4190  | -21.9160 | 16.1780  | C  | 0 | 38.7340                   | 50.1670 | 67.2070 | H       | 0 |   |
| 2.9670  | -20.9950 | 16.3790  | H  | 0 | 39.1750                   | 52.2840 | 66.6820 | C       | 0 |   |
| 1.1800  | -22.0020 | 17.0590  | C  | 0 | 38.4820                   | 52.9470 | 67.2000 | H       | 0 |   |
| 1.3940  | -21.9210 | 18.1250  | H  | 0 | 40.0640                   | 52.9090 | 66.5890 | H       | 0 |   |
| 0.5590  | -21.2050 | 16.6500  | H  | 0 | 38.5600                   | 52.0650 | 65.2900 | C       | 0 |   |
| 0.8010  | -23.0130 | 16.9080  | H  | 0 | 37.7720                   | 51.1730 | 65.1770 | O       | 0 |   |
| 3.4450  | -23.0070 | 16.4790  | C  | 0 | 39.0390                   | 52.7400 | 64.2500 | N       | 0 |   |
| 3.7990  | -23.8340 | 15.6010  | O  | 0 | 38.7230                   | 52.4320 | 63.3410 | H       | 0 |   |
| 4.0180  | -23.0660 | 17.7000  | N  | 0 | 39.8450                   | 53.3300 | 64.4000 | H       | 0 |   |
| 3.7430  | -22.4510 | 18.4530  | H  | 0 | 40.8220                   | 50.3730 | 67.0610 | C       | 0 |   |
| 4.9270  | -24.1700 | 18.1410  | C  | 0 | 40.9040                   | 49.4680 | 66.2710 | O       | 0 |   |
| 5.4980  | -24.5550 | 17.2960  | H  | 0 | 41.8990                   | 50.8550 | 67.6270 | N       | 0 |   |
| 5.9730  | -23.5830 | 19.0560  | C  | 0 | 41.8830                   | 51.6550 | 68.2440 | H       | 0 |   |
| 5.3500  | -23.3390 | 19.9160  | H  | 0 | 43.2340                   | 50.5810 | 67.1600 | C       | 0 |   |
| 6.6930  | -24.2690 | 19.5020  | H  | 0 | 43.2730                   | 51.0690 | 66.1860 | H       | 0 |   |
| 6.8260  | -22.3840 | 18.6130  | C  | 0 | 44.3600                   | 51.1490 | 68.0780 | C       | 0 |   |
| 6.2950  | -21.5870 | 18.0920  | H  | 0 | 44.2970                   | 50.7320 | 69.0830 | H       | 0 |   |
| 7.5780  | -21.7670 | 19.7650  | C  | 0 | 45.3110                   | 50.8850 | 67.6150 | H       | 0 |   |
| 8.1600  | -20.9000 | 19.4530  | H  | 0 | 44.3870                   | 52.6710 | 68.2890 | C       | 0 |   |
| 6.8210  | -21.5120 | 20.5070  | H  | 0 | 45.2900                   | 53.0880 | 69.0770 | O       | 0 |   |
| 8.2230  | -22.5970 | 20.0550  | H  | 0 | 43.5830                   | 53.4440 | 67.7780 | O       | 0 |   |
| 7.8120  | -22.8950 | 17.6120  | C  | 0 | 43.5860                   | 49.0440 | 67.0150 | C       | 0 |   |
| 8.3810  | -22.0490 | 17.2280  | H  | 0 | 44.2410                   | 48.5790 | 66.1110 | O       | 0 |   |
| 8.5040  | -23.5860 | 18.0940  | H  | 0 | 43.0080                   | 48.2820 | 67.9190 | N       | 0 |   |
| 7.2780  | -23.3590 | 16.7820  | H  | 0 | 42.5340                   | 48.7770 | 68.6610 | H       | 0 |   |
| 4.2150  | -25.4630 | 18.7190  | C  | 0 | 43.0160                   | 46.8340 | 68.0310 | C       | 0 |   |
| 3.3220  | -25.4020 | 19.5690  | O  | 0 | 44.0320                   | 46.5790 | 68.3330 | H       | 0 |   |
| 4.5930  | -26.5020 | 18.0600  | O  | 0 | 42.0040                   | 46.3250 | 69.1080 | C       | 0 |   |
| -4.6830 | -2.2510  | -8.1290  | N  | 0 | 42.2270                   | 45.2770 | 69.3080 | H       | 0 |   |
| -3.9580 | -3.3730  | -8.4190  | C  | 0 | 42.3600                   | 46.8280 | 70.0070 | H       | 0 |   |
| -4.0710 | -4.6220  | -7.6550  | C  | 0 | 40.5250                   | 46.5840 | 69.0110 | C       | 0 |   |
| -3.2240 | -5.5220  | -7.8330  | O  | 0 | 40.1460                   | 46.3590 | 68.0140 | H       | 0 |   |
| -4.9180 | -4.7520  | -6.8070  | O  | 0 | 40.0110                   | 45.8610 | 69.6440 | H       | 0 |   |
| -2.9510 | -3.0820  | -9.3110  | C  | 0 | 39.9620                   | 48.0130 | 69.2480 | C       | 0 |   |
| -3.0510 | -1.6650  | -9.5590  | C  | 0 | 40.6840                   | 48.8400 | 69.8320 | O       | 0 |   |
| -4.2110 | -1.1860  | -8.9260  | C  | 0 | 38.8280                   | 48.3760 | 68.8450 | O       | 0 |   |
| -2.0360 | -0.8080  | -10.2170 | C  | 0 | 42.5820                   | 46.1220 | 66.6350 | C       | 0 |   |
| -0.9570 | -1.2180  | -10.5530 | O  | 0 | 43.0710                   | 45.0190 | 66.3980 | O       | 0 |   |
| -2.3840 | 0.7380   | -10.3080 | C  | 0 | 41.7530                   | 46.7330 | 65.8380 | N       | 0 |   |
| -1.8080 | 1.5680   | -11.0250 | O  | 0 | 41.3790                   | 47.6190 | 66.1470 | H       | 0 |   |
| -3.6230 | 1.2180   | -9.5310  | C  | 0 | 41.4920                   | 46.1630 | 64.5330 | C       | 0 |   |
| -3.9240 | 2.5280   | -9.6880  | N  | 0 | 41.7330                   | 45.1030 | 64.4520 | H       | 0 |   |
| -5.0700 | 3.0300   | -9.1570  | C  | 0 | 40.1010                   | 46.6170 | 64.2210 | C       | 0 |   |
| -5.2360 | 4.5230   | -9.3650  | C  | 0 | 39.4320                   | 46.4280 | 65.0610 | H       | 0 |   |
| -4.4550 | 4.9550   | -10.2610 | O  | 0 | 40.1240                   | 47.7010 | 64.1080 | H       | 0 |   |
| -6.2160 | 5.0930   | -8.9290  | O  | 0 | 39.3510                   | 45.9610 | 62.9560 | C       | 0 |   |
| -5.9080 | 2.1660   | -8.4310  | C  | 0 | 38.2790                   | 45.9210 | 63.1500 | H       | 0 |   |
| -5.6560 | 0.8160   | -8.3380  | C  | 0 | 39.7580                   | 46.6590 | 61.6260 | C       | 0 |   |
| -6.7330 | 0.0280   | -7.5580  | C  | 0 | 40.8200                   | 46.5360 | 61.4130 | H       | 0 |   |
| -6.6490 | -1.0730  | -7.0940  | O  | 0 | 39.1870                   | 46.3160 | 60.7630 | H       | 0 |   |
| -7.8110 | 0.5320   | -7.2960  | O  | 0 | 39.5030                   | 47.7160 | 61.7060 | H       | 0 |   |
| -4.5190 | 0.2640   | -8.9320  | C  | 0 | 39.6380                   | 44.5140 | 62.8250 | C       | 0 |   |
| -5.5420 | -2.2210  | -7.5960  | H  | 0 | 40.5600                   | 44.3590 | 62.2650 | H       | 0 |   |
| -6.7650 | 2.6520   | -7.9710  | H  | 0 | 39.7220                   | 43.9730 | 63.7670 | H       | 0 |   |
| -2.1730 | -3.7400  | -9.6850  | H  | 0 | 38.9020                   | 43.8890 | 62.3200 | H       | 0 |   |
| -2.4020 | 4.1630   | -11.3310 | Eu | 0 | 42.3610                   | 46.7330 | 63.4480 | C       | 0 |   |
|         |          |          |    |   | 42.8170                   | 45.9920 | 62.6020 | O       | 0 |   |
|         |          |          |    |   | 42.8340                   | 47.9940 | 63.5320 | N       | 0 |   |
|         |          |          |    |   | 42.7140                   | 48.4620 | 64.4180 | H       | 0 |   |
|         |          |          |    |   | 43.4370                   | 48.8520 | 62.4300 | C       | 0 |   |
|         |          |          |    |   | 42.7750                   | 48.6810 | 61.5810 | H       | 0 |   |
|         |          |          |    |   | 43.2950                   | 50.3720 | 62.7490 | C       | 0 |   |
|         |          |          |    |   | 43.7950                   | 50.6930 | 63.6620 | H       | 0 |   |
|         |          |          |    |   | 43.8630                   | 51.2730 | 61.5960 | C       | 0 |   |
|         |          |          |    |   | 43.3510                   | 50.9120 | 60.7040 | H       | 0 |   |
|         |          |          |    |   | 43.5190                   | 52.3020 | 61.6990 | H       | 0 |   |
|         |          |          |    |   | 44.9500                   | 51.1940 | 61.5930 | H       | 0 |   |
|         |          |          |    |   | 41.8660                   | 50.8180 | 62.9760 | C       | 0 |   |
|         |          |          |    |   | 41.5240                   | 50.3380 | 63.8930 | H       | 0 |   |
|         |          |          |    |   | 41.7540                   | 51.9000 | 63.0520 | H       | 0 |   |
|         |          |          |    |   | 40.7510                   | 50.5630 | 61.9550 | C       | 0 |   |
|         |          |          |    |   | 41.0140                   | 51.0650 | 61.0240 | H       | 0 |   |
|         |          |          |    |   | 40.7250                   | 49.4830 | 61.8140 | H       | 0 |   |
|         |          |          |    |   | 39.7650                   | 50.8800 | 62.2930 | H       | 0 |   |
|         |          |          |    |   | 44.8480                   | 48.3910 | 62.1560 | C       | 0 |   |
|         |          |          |    |   | 45.2570                   | 48.1480 | 61.0240 | O       | 0 |   |
|         |          |          |    |   | 45.5520                   | 48.0060 | 63.1890 | N       | 0 |   |
|         |          |          |    |   | 45.0410                   | 48.1520 | 64.0470 | H       | 0 |   |
|         |          |          |    |   | 46.9520                   | 47.4820 | 63.1970 | C       | 0 |   |
|         |          |          |    |   | 47.6100                   | 48.1760 | 62.6760 | H       | 0 |   |
|         |          |          |    |   | 47.3740                   | 47.2860 | 64.6800 | C       | 0 |   |
|         |          |          |    |   | 46.6230                   | 46.6920 | 65.2010 | H       | 0 |   |
|         |          |          |    |   | 48.3330                   | 46.7670 | 64.6770 | H       | 0 |   |
|         |          |          |    |   | 47.5300                   | 48.6850 | 65.3740 | C       | 0 |   |
|         |          |          |    |   | 46.6270                   | 49.2300 | 65.1020 | H       | 0 |   |
|         |          |          |    |   | 47.6200                   | 48.4760 | 64.4400 | H       | 0 |   |
|         |          |          |    |   | 48.7680                   | 49.4410 | 64.8620 | C       | 0 |   |
|         |          |          |    |   | 49.6780                   | 48.8550 | 64.7350 | H       | 0 |   |
|         |          |          |    |   | 48.4940                   | 49.8770 | 63.9010 | H       | 0 |   |
|         |          |          |    |   | 49.1270                   | 50.4890 | 65.9320 | C       | 0 |   |
|         |          |          |    |   | 48.3210                   | 51.2050 | 66.0950 | H       | 0 |   |
|         |          |          |    |   | 49.0980                   | 49.9560 | 66.8830 | H       | 0 |   |
|         |          |          |    |   | 50.3810                   | 51.2360 | 65.5880 | N       | 0 |   |
|         |          |          |    |   | 50.2160                   | 52.0000 | 64.9480 | H       | 0 |   |
|         |          |          |    |   | 50.7840                   | 51.6470 | 66.4180 | H       | 0 |   |
|         |          |          |    |   | 51.1240                   | 50.7120 | 65.1490 | H       | 0 |   |
|         |          |          |    |   | 47.0420                   | 46.1700 | 62.5510 | C       | 0 |   |
|         |          |          |    |   | 48.1960                   | 45.8450 | 62.1510 | O       | 0 |   |
|         |          |          |    |   | 45.9550                   | 45.4510 | 62.4130 | N       | 0 |   |
|         |          |          |    |   | 45.0580                   | 45.7810 | 62.7410 | H       | 0 |   |
|         |          |          |    |   | 45.8980                   | 44.1790 | 61.7160 | C       | 0 |   |
|         |          |          |    |   | 46.9080                   | 43.7720 | 61.7540 | H       | 0 |   |
|         |          |          |    |   | 45.0220                   | 43.2460 | 62.5610 | C       | 0 |   |
|         |          |          |    |   | 44.0740                   | 43.7430 | 62.7620 | H       | 0 |   |
|         |          |          |    |   | 44.7860                   | 42.3010 | 62.0720 | H       | 0 |   |
|         |          |          |    |   | 45.6870                   | 42.8670 | 63.9230 | C       | 0 |   |
|         |          |          |    |   | 45.4810                   | 43.6490 | 64.6540 | H       | 0 |   |
|         |          |          |    |   | 44.9710                   | 41.6110 | 64.4020 | C       | 0 |   |
|         |          |          |    |   | 45.3350                   | 40.8000 | 63.7710 | H       | 0 |   |
|         |          |          |    |   | 45.1980                   | 41.3240 | 65.4290 | H       | 0 |   |
|         |          |          |    |   | 43.8980                   | 41.8020 | 64.4000 | H       | 0 |   |
|         |          |          |    |   | 47.1580                   | 42.5620 | 63.8820 | C       | 0 |   |
|         |          |          |    |   | 47.3910                   | 42.1050 | 62.9210 | H       | 0 |   |
|         |          |          |    |   | 47.7010                   | 43.5040 | 63.9650 | H       | 0 |   |
|         |          |          |    |   | 47.4620                   | 41.8690 | 64.6670 | H       | 0 |   |
|         |          |          |    |   | 45.3780                   | 44.2440 | 60.3190 | C       | 0 |   |
|         |          |          |    |   | 45.8980                   | 43.6390 | 59.4180 | O       | 0 |   |
|         |          |          |    |   | 44.3680                   | 45.0990 | 60.0980 | N       | 0 |   |
|         |          |          |    |   | 43.9340                   | 45.5750 | 60.8760 | H       | 0 |   |
|         |          |          |    |   | 43.8580                   | 45.5060 | 68.7480 | C       | 0 |   |
|         |          |          |    |   | 43.3800                   | 44.6270 | 58.3150 | H       | 0 |   |
|         |          |          |    |   | 42.8860                   | 46.6090 | 59.0050 | C       | 0 |   |
|         |          |          |    |   | 42.1420                   | 46.2210 | 59.7010 | H       | 0 |   |
|         |          |          |    |   | 43.4880                   | 47.4220 | 59.4110 | H       | 0 |   |
|         |          |          |    |   | 42.2430                   | 47.1270 | 57.7500 | C       | 0 |   |
|         |          |          |    |   | 42.9690                   | 47.8640 | 57.4060 | H       | 0 |   |
|         |          |          |    |   | 42.0460                   | 46.2770 | 57.0970 | H       | 0 |   |
|         |          |          |    |   | 40.8730                   | 47.8280 | 57.9510 | C       | 0 |   |
|         |          |          |    |   | 40.0260                   | 47.6370 | 57.0510 | O       | 0 |   |
|         |          |          |    |   | 40.6030                   | 48.4970 | 58.9810 | O       | 0 |   |
|         |          |          |    |   | 44.9720                   | 45.9360 | 57.7730 | C       | 0 |   |
|         |          |          |    |   | 45.0050                   | 45.5000 | 56.6590 | O       | 0 |   |
|         |          |          |    |   | 45.9250                   | 46.5990 | 58.3440 | N       | 0 |   |
|         |          |          |    |   | 45.7860                   | 46.9660 | 59.2740 | H       | 0 |   |
|         |          |          |    |   |                           |         |         |         |   |   |

|         |         |         |   |   |         |         |         |   |   |         |         |         |   |   |
|---------|---------|---------|---|---|---------|---------|---------|---|---|---------|---------|---------|---|---|
| 45.6400 | 52.1360 | 57.7850 | H | 0 | 45.2140 | 40.2600 | 50.7490 | C | 0 | 42.4230 | 43.9740 | 51.1170 | H | 0 |
| 45.2500 | 51.8980 | 55.7240 | N | 0 | 46.2060 | 40.5630 | 50.4480 | H | 0 | 44.0940 | 43.8550 | 52.2920 | C | 0 |
| 44.5930 | 52.6430 | 55.5420 | H | 0 | 45.1610 | 39.7290 | 52.0570 | C | 0 | 44.6670 | 44.5340 | 51.6610 | H | 0 |
| 46.1260 | 52.2150 | 55.3340 | H | 0 | 46.0770 | 39.7040 | 52.6290 | H | 0 | 43.6540 | 44.5110 | 53.0430 | H | 0 |
| 44.9970 | 51.1830 | 55.0570 | H | 0 | 43.9510 | 39.2140 | 52.4350 | C | 0 | 45.1970 | 42.9560 | 53.0010 | C | 0 |
| 48.2990 | 46.2170 | 57.7110 | C | 0 | 42.7430 | 39.2110 | 56.9410 | C | 0 | 44.6730 | 42.1890 | 53.5710 | H | 0 |
| 49.2320 | 46.3770 | 56.9030 | O | 0 | 42.1540 | 38.1500 | 57.0450 | O | 0 | 45.7680 | 42.3790 | 52.2740 | H | 0 |
| 48.3330 | 45.2240 | 58.6210 | N | 0 | 42.3090 | 40.3820 | 57.5240 | N | 0 | 46.0540 | 43.6620 | 54.0380 | C | 0 |
| 47.4400 | 44.9450 | 59.0000 | H | 0 | 42.9610 | 41.1440 | 57.4000 | H | 0 | 46.5610 | 44.5380 | 53.6320 | H | 0 |
| 49.4730 | 44.2740 | 58.6550 | C | 0 | 41.2270 | 40.5000 | 58.5180 | C | 0 | 45.3310 | 43.7950 | 54.8430 | H | 0 |
| 50.3000 | 44.9650 | 58.8200 | H | 0 | 41.1250 | 39.6700 | 59.2180 | H | 0 | 46.9950 | 42.7280 | 54.6260 | N | 0 |
| 49.2050 | 43.4160 | 59.8780 | C | 0 | 41.3310 | 41.7970 | 59.3050 | C | 0 | 47.6420 | 42.3950 | 53.9260 | H | 0 |
| 49.2530 | 43.9800 | 60.8090 | H | 0 | 40.5520 | 41.8780 | 60.0640 | H | 0 | 47.6480 | 43.2110 | 55.2270 | H | 0 |
| 48.2430 | 42.9150 | 59.7710 | H | 0 | 42.6610 | 41.7770 | 60.0640 | C | 0 | 46.5380 | 41.9420 | 55.0660 | H | 0 |
| 50.2810 | 42.4370 | 60.0030 | C | 0 | 42.6700 | 42.6460 | 60.7220 | H | 0 | 41.4530 | 43.1490 | 53.6520 | C | 0 |
| 50.0720 | 41.9020 | 60.9290 | H | 0 | 42.7460 | 40.9150 | 60.7250 | H | 0 | 41.6500 | 42.7720 | 54.7650 | O | 0 |
| 50.3200 | 41.6850 | 59.2150 | H | 0 | 43.5230 | 41.8560 | 59.4000 | H | 0 | 40.8010 | 44.2740 | 53.3410 | N | 0 |
| 51.6620 | 43.0430 | 60.3310 | C | 0 | 41.2240 | 43.0350 | 58.4170 | C | 0 | 40.7010 | 44.4460 | 52.3500 | H | 0 |
| 52.6620 | 42.2370 | 60.1840 | O | 0 | 41.4680 | 43.8010 | 59.1540 | H | 0 | 40.3190 | 45.3430 | 54.2710 | C | 0 |
| 51.8140 | 44.2120 | 60.8050 | O | 0 | 41.9660 | 42.9810 | 57.6200 | H | 0 | 40.4510 | 44.9000 | 55.2580 | H | 0 |
| 49.6400 | 43.5420 | 57.3320 | C | 0 | 40.2250 | 43.1900 | 58.0110 | H | 0 | 41.3090 | 46.5070 | 54.2640 | C | 0 |
| 48.6350 | 43.0040 | 56.8480 | O | 0 | 39.7730 | 40.5020 | 57.9740 | C | 0 | 41.0820 | 47.3840 | 54.8720 | H | 0 |
| 50.8270 | 43.5720 | 56.6770 | N | 0 | 38.6690 | 40.3240 | 58.6000 | O | 0 | 42.2160 | 46.0660 | 54.6770 | H | 0 |
| 52.0910 | 44.3080 | 56.9890 | C | 0 | 39.7820 | 40.7100 | 56.6810 | N | 0 | 41.5310 | 47.0750 | 52.9030 | C | 0 |
| 52.7700 | 43.5760 | 57.4260 | H | 0 | 40.6760 | 40.9430 | 56.2740 | H | 0 | 40.6610 | 47.4550 | 52.1810 | O | 0 |
| 51.9130 | 45.1530 | 57.6540 | H | 0 | 38.6020 | 40.8390 | 55.8230 | C | 0 | 42.7290 | 47.2590 | 52.4460 | N | 0 |
| 52.6620 | 44.8400 | 55.7160 | C | 0 | 37.7880 | 40.3480 | 56.3570 | H | 0 | 42.8300 | 47.5080 | 51.4730 | H | 0 |
| 53.7490 | 44.9180 | 55.6890 | H | 0 | 38.2100 | 42.2990 | 55.7150 | C | 0 | 43.5480 | 46.9950 | 52.9750 | H | 0 |
| 52.2530 | 45.8380 | 55.5530 | H | 0 | 37.8170 | 42.4930 | 56.7130 | H | 0 | 38.8900 | 45.7220 | 54.1880 | C | 0 |
| 52.1020 | 43.8190 | 54.7070 | C | 0 | 39.0580 | 42.9410 | 55.4760 | H | 0 | 38.2070 | 45.3050 | 53.2540 | O | 0 |
| 52.9010 | 43.1620 | 54.3620 | H | 0 | 37.1050 | 42.6470 | 54.7770 | C | 0 | 38.4080 | 46.4720 | 55.1300 | N | 0 |
| 51.7860 | 44.4470 | 53.8750 | H | 0 | 36.9000 | 43.7090 | 54.9150 | H | 0 | 38.8360 | 46.6880 | 56.0190 | H | 0 |
| 50.9000 | 43.1460 | 55.2380 | C | 0 | 37.5570 | 42.4540 | 53.8040 | H | 0 | 37.0600 | 47.0110 | 55.1190 | C | 0 |
| 49.9700 | 43.5320 | 54.8220 | H | 0 | 35.5130 | 41.7620 | 55.0100 | S | 0 | 36.4060 | 46.2410 | 54.7100 | H | 0 |
| 50.7790 | 41.6220 | 55.1620 | C | 0 | 34.4650 | 42.3930 | 53.6050 | C | 0 | 36.5840 | 47.2590 | 56.5340 | C | 0 |
| 50.1480 | 41.1050 | 54.1980 | O | 0 | 35.1220 | 42.5080 | 52.7430 | H | 0 | 37.2990 | 48.0140 | 56.8620 | H | 0 |
| 51.2050 | 40.8680 | 56.1530 | N | 0 | 33.5670 | 41.7800 | 53.5290 | H | 0 | 35.6060 | 47.7410 | 56.5110 | H | 0 |
| 51.6880 | 41.2480 | 56.9540 | H | 0 | 34.1530 | 43.4230 | 53.7770 | H | 0 | 36.3980 | 45.9910 | 57.2920 | C | 0 |
| 50.9390 | 39.4260 | 56.2180 | C | 0 | 38.7980 | 40.1880 | 54.5310 | C | 0 | 35.3820 | 45.0240 | 57.0130 | C | 0 |
| 51.2330 | 38.9600 | 55.2780 | H | 0 | 39.8260 | 40.2220 | 53.9110 | O | 0 | 34.6210 | 45.2640 | 56.2860 | H | 0 |
| 51.6690 | 39.0460 | 56.9330 | H | 0 | 37.7360 | 39.6740 | 53.9760 | N | 0 | 35.3610 | 43.7760 | 57.7350 | C | 0 |
| 49.5570 | 38.9170 | 56.5810 | C | 0 | 36.7990 | 39.6670 | 54.3540 | H | 0 | 34.5760 | 43.0470 | 57.5970 | H | 0 |
| 49.0920 | 37.9610 | 56.0210 | O | 0 | 37.7790 | 38.8420 | 52.7520 | C | 0 | 36.3900 | 43.4610 | 58.7240 | C | 0 |
| 48.8340 | 39.6500 | 57.4820 | N | 0 | 38.5630 | 38.1470 | 53.0540 | H | 0 | 36.3310 | 42.2930 | 59.4080 | O | 0 |
| 49.2310 | 40.5150 | 57.8210 | H | 0 | 36.4960 | 38.0490 | 52.5000 | C | 0 | 37.0170 | 42.3890 | 60.0720 | H | 0 |
| 47.4440 | 39.3450 | 55.9340 | C | 0 | 35.8190 | 38.8320 | 52.1600 | H | 0 | 37.3910 | 44.4560 | 58.9790 | C | 0 |
| 47.4020 | 38.2690 | 58.1030 | H | 0 | 36.6700 | 37.4450 | 51.6100 | H | 0 | 38.2430 | 44.3150 | 59.6270 | H | 0 |
| 47.0680 | 39.9810 | 59.3090 | C | 0 | 35.8530 | 37.1920 | 53.6270 | C | 0 | 37.3330 | 45.7260 | 58.3170 | C | 0 |
| 46.9230 | 41.0610 | 59.2760 | H | 0 | 36.5000 | 36.4480 | 54.0920 | H | 0 | 38.1030 | 46.4350 | 58.5850 | H | 0 |
| 46.1420 | 39.5390 | 59.6760 | H | 0 | 35.7340 | 37.7790 | 54.5380 | H | 0 | 36.9110 | 48.2220 | 54.1170 | C | 0 |
| 48.1410 | 39.8220 | 60.3940 | C | 0 | 34.4150 | 36.6800 | 53.3470 | C | 0 | 35.8130 | 48.6260 | 53.7510 | O | 0 |
| 49.1520 | 39.7330 | 59.9950 | H | 0 | 34.0800 | 36.3760 | 52.1730 | O | 0 | 38.0060 | 48.8420 | 53.6100 | N | 0 |
| 47.9780 | 40.6890 | 61.0340 | H | 0 | 33.6180 | 36.5510 | 54.3460 | N | 0 | 38.9270 | 48.5190 | 53.8710 | H | 0 |
| 48.0490 | 38.6410 | 61.2900 | C | 0 | 32.6980 | 36.2400 | 54.0670 | H | 0 | 38.0210 | 49.6590 | 52.4200 | C | 0 |
| 47.5410 | 38.7320 | 62.3800 | O | 0 | 33.9350 | 36.5890 | 55.3040 | H | 0 | 37.1620 | 50.3270 | 52.3660 | H | 0 |
| 48.4300 | 37.4610 | 60.8600 | N | 0 | 38.3180 | 39.5630 | 51.5140 | C | 0 | 39.3330 | 50.4580 | 52.4180 | C | 0 |
| 48.4970 | 36.6670 | 61.4800 | H | 0 | 38.8360 | 38.9040 | 50.5940 | O | 0 | 40.1170 | 49.9530 | 52.9820 | H | 0 |
| 48.9780 | 37.3870 | 60.0150 | H | 0 | 38.1690 | 40.9290 | 51.5650 | N | 0 | 39.6140 | 50.8170 | 51.4280 | H | 0 |
| 46.3860 | 39.6530 | 56.9390 | C | 0 | 37.7400 | 41.3080 | 52.3980 | H | 0 | 39.2180 | 51.3480 | 53.0370 | H | 0 |
| 46.6150 | 40.4210 | 56.0000 | O | 0 | 38.6120 | 41.9440 | 50.6290 | C | 0 | 37.8140 | 48.9400 | 51.0870 | C | 0 |
| 45.1600 | 39.0570 | 57.0570 | N | 0 | 38.7350 | 41.3010 | 49.7580 | H | 0 | 37.8090 | 49.6150 | 50.0120 | O | 0 |
| 44.9440 | 38.3640 | 57.7600 | H | 0 | 37.5250 | 42.9550 | 50.2710 | C | 0 | 37.6440 | 47.6160 | 51.0680 | N | 0 |
| 44.0640 | 39.2090 | 56.1220 | C | 0 | 37.2130 | 43.3930 | 51.2190 | H | 0 | 37.5740 | 47.1450 | 51.9580 | H | 0 |
| 44.0270 | 40.2140 | 55.7010 | H | 0 | 38.0590 | 43.6620 | 49.6360 | H | 0 | 37.6090 | 46.7130 | 49.9360 | C | 0 |
| 44.1640 | 38.1960 | 54.9850 | C | 0 | 36.3650 | 42.4310 | 49.4350 | C | 0 | 37.7600 | 45.7610 | 50.4450 | H | 0 |
| 45.1830 | 38.2720 | 54.6030 | H | 0 | 36.5930 | 41.4440 | 48.7260 | O | 0 | 36.1930 | 46.5710 | 49.3030 | C | 0 |
| 43.9100 | 37.2100 | 55.3740 | H | 0 | 35.1910 | 42.9810 | 49.5280 | N | 0 | 35.9240 | 47.5090 | 48.8180 | H | 0 |
| 43.4350 | 38.5710 | 53.7440 | C | 0 | 34.3800 | 42.6080 | 49.0570 | H | 0 | 36.3130 | 45.8120 | 48.5310 | H | 0 |
| 42.2560 | 37.9980 | 53.3580 | C | 0 | 35.0550 | 43.7740 | 50.1380 | H | 0 | 35.1360 | 46.2080 | 50.2740 | C | 0 |
| 41.5880 | 37.4440 | 54.0010 | H | 0 | 40.0120 | 42.5230 | 50.8400 | C | 0 | 35.2670 | 45.2430 | 51.0580 | O | 0 |
| 41.8690 | 38.5510 | 52.1320 | N | 0 | 40.1850 | 43.6270 | 50.4720 | O | 0 | 33.9950 | 46.9060 | 50.2600 | N | 0 |
| 40.9000 | 38.5310 | 51.8460 | H | 0 | 40.9140 | 41.8100 | 51.5870 | N | 0 | 33.4010 | 46.7360 | 51.0580 | H | 0 |
| 42.8410 | 39.1830 | 51.4380 | C | 0 | 40.5980 | 40.8840 | 51.8370 | H | 0 | 33.8330 | 47.7730 | 49.7690 | H | 0 |
| 42.9600 | 39.7380 | 50.1500 | C | 0 | 41.9730 | 42.4100 | 52.3870 | C | 0 | 38.8030 | 46.7300 | 48.9380 | C | 0 |
| 42.1860 | 39.6110 | 49.4080 | H | 0 | 42.3930 | 41.5440 | 52.8990 | H | 0 | 38.6040 | 46.2930 | 47.7890 | O | 0 |
| 44.1780 | 40.3180 | 49.8220 | C | 0 | 43.0280 | 43.1460 | 51.4880 | C | 0 | 39.9730 | 47.1740 | 49.3030 | N | 0 |
| 44.3750 | 40.7310 | 48.8440 | H | 0 | 43.4460 | 42.4220 | 50.7880 | H | 0 | 39.9970 | 47.5610 | 50.2350 | H | 0 |

|         |         |         |   |   |         |         |         |   |   |         |         |         |   |   |
|---------|---------|---------|---|---|---------|---------|---------|---|---|---------|---------|---------|---|---|
| 41.0000 | 47.4840 | 48.2550 | C | 0 | 51.8330 | 47.5960 | 50.3220 | H | 0 | 56.4950 | 38.0930 | 41.8740 | C | 0 |
| 40.5940 | 48.2010 | 47.5410 | H | 0 | 50.3120 | 47.0940 | 51.8610 | C | 0 | 55.5830 | 38.6900 | 41.8780 | H | 0 |
| 42.2900 | 48.2490 | 48.7920 | C | 0 | 49.7930 | 46.0270 | 52.2800 | O | 0 | 57.5700 | 39.0000 | 42.3300 | C | 0 |
| 42.8910 | 48.5480 | 47.9370 | H | 0 | 49.6650 | 48.1120 | 51.8760 | O | 0 | 57.7550 | 39.8860 | 41.7220 | H | 0 |
| 41.9260 | 49.4610 | 49.6060 | C | 0 | 53.2280 | 44.1080 | 49.3120 | C | 0 | 57.4650 | 39.3800 | 43.3460 | H | 0 |
| 42.6650 | 49.7390 | 50.3570 | H | 0 | 54.4160 | 44.4080 | 49.0730 | O | 0 | 58.9010 | 38.2860 | 42.3450 | C | 0 |
| 41.9060 | 50.3010 | 48.9120 | H | 0 | 52.7260 | 42.8320 | 49.1730 | N | 0 | 59.4540 | 37.9610 | 41.2870 | O | 0 |
| 40.9210 | 49.3510 | 50.0120 | H | 0 | 51.7360 | 42.6330 | 49.1500 | H | 0 | 59.4340 | 38.0350 | 43.4730 | N | 0 |
| 43.0060 | 47.4270 | 49.6640 | O | 0 | 53.6470 | 41.6790 | 49.0020 | C | 0 | 60.3340 | 37.5760 | 43.4860 | H | 0 |
| 43.8060 | 47.9120 | 49.8770 | H | 0 | 54.4670 | 41.7870 | 49.7120 | H | 0 | 59.0360 | 38.5070 | 44.2720 | H | 0 |
| 41.4370 | 46.2730 | 47.3950 | C | 0 | 52.9170 | 40.4340 | 49.4050 | C | 0 | 56.7980 | 37.5850 | 40.4150 | C | 0 |
| 41.7050 | 46.3690 | 46.1660 | O | 0 | 52.0320 | 40.2990 | 48.7830 | H | 0 | 56.8900 | 36.3890 | 40.1040 | O | 0 |
| 41.5200 | 45.1280 | 48.0880 | N | 0 | 53.6570 | 39.6400 | 49.3080 | H | 0 | 56.7770 | 38.5020 | 39.4180 | N | 0 |
| 41.3440 | 45.1820 | 49.0810 | H | 0 | 52.3890 | 40.2540 | 50.8820 | C | 0 | 56.9200 | 39.4450 | 39.7500 | H | 0 |
| 42.0230 | 43.8780 | 47.5120 | C | 0 | 51.5040 | 40.8870 | 50.9450 | H | 0 | 56.9330 | 38.1870 | 37.9860 | C | 0 |
| 42.2220 | 43.1980 | 48.3400 | H | 0 | 51.9060 | 38.8180 | 51.0430 | C | 0 | 55.9980 | 37.7800 | 37.6010 | H | 0 |
| 40.9560 | 43.3780 | 46.5460 | C | 0 | 50.9440 | 38.7530 | 50.5340 | H | 0 | 57.1040 | 39.5060 | 37.1460 | C | 0 |
| 40.7130 | 44.0850 | 45.7530 | H | 0 | 52.5840 | 38.0940 | 50.5910 | H | 0 | 57.2640 | 39.2520 | 36.0980 | H | 0 |
| 41.2670 | 42.4580 | 46.0510 | H | 0 | 51.7520 | 38.6300 | 52.1060 | H | 0 | 55.8540 | 40.4340 | 37.2090 | C | 0 |
| 39.5690 | 42.9940 | 47.1170 | C | 0 | 53.4430 | 40.5430 | 51.9530 | C | 0 | 56.0710 | 41.2710 | 36.5460 | H | 0 |
| 39.6780 | 42.3660 | 48.0010 | H | 0 | 53.9760 | 41.4670 | 51.7320 | H | 0 | 55.0710 | 39.8530 | 36.7210 | H | 0 |
| 39.0140 | 43.9070 | 47.3330 | H | 0 | 52.8460 | 40.6900 | 52.8530 | H | 0 | 55.6310 | 40.7560 | 38.2270 | H | 0 |
| 38.7070 | 42.2630 | 46.1150 | C | 0 | 54.1280 | 39.7040 | 52.0750 | H | 0 | 58.3100 | 40.1430 | 37.5630 | O | 0 |
| 37.7320 | 42.1510 | 46.5890 | H | 0 | 54.3760 | 41.5630 | 47.6520 | C | 0 | 58.5880 | 40.6790 | 36.8160 | H | 0 |
| 38.6110 | 42.8600 | 45.2070 | H | 0 | 53.7770 | 41.8240 | 46.6180 | O | 0 | 58.0240 | 37.2150 | 37.6370 | C | 0 |
| 39.2140 | 40.9300 | 45.8870 | N | 0 | 55.5600 | 41.0000 | 47.5970 | N | 0 | 57.8330 | 36.4560 | 36.7240 | O | 0 |
| 39.7050 | 40.7690 | 45.0200 | H | 0 | 55.9750 | 40.6880 | 48.4630 | H | 0 | 59.1220 | 37.1180 | 38.4070 | N | 0 |
| 39.1680 | 39.7670 | 46.5330 | C | 0 | 56.3770 | 41.0420 | 46.4240 | C | 0 | 59.0400 | 37.7480 | 39.1920 | H | 0 |
| 38.6170 | 39.7160 | 47.7170 | N | 0 | 55.9140 | 41.1870 | 45.4480 | H | 0 | 60.3230 | 36.3460 | 38.1550 | C | 0 |
| 38.0540 | 40.4860 | 48.0490 | H | 0 | 57.1500 | 42.3510 | 46.6900 | C | 0 | 60.5970 | 36.3270 | 37.1000 | H | 0 |
| 38.7040 | 38.9540 | 48.3740 | H | 0 | 56.4050 | 43.0960 | 46.9690 | H | 0 | 61.4650 | 37.2250 | 38.6800 | C | 0 |
| 39.7110 | 38.7050 | 46.0530 | N | 0 | 57.7360 | 42.2890 | 47.6080 | H | 0 | 61.3130 | 37.6520 | 39.6700 | H | 0 |
| 39.9870 | 38.7060 | 45.0810 | H | 0 | 57.9030 | 42.9270 | 45.5500 | C | 0 | 62.4360 | 36.7310 | 38.7370 | H | 0 |
| 40.2390 | 38.0900 | 46.6550 | H | 0 | 58.6100 | 42.3070 | 44.7450 | O | 0 | 61.7090 | 38.3890 | 37.7370 | C | 0 |
| 43.4460 | 44.0630 | 46.8230 | C | 0 | 57.7320 | 44.2540 | 45.3930 | N | 0 | 62.1510 | 37.9620 | 36.8370 | H | 0 |
| 43.8290 | 43.2320 | 46.0080 | O | 0 | 58.2560 | 44.7320 | 44.6740 | H | 0 | 60.8450 | 38.9590 | 37.3980 | H | 0 |
| 44.1290 | 44.9900 | 47.4150 | N | 0 | 56.9890 | 44.7090 | 45.9030 | H | 0 | 62.7390 | 39.3790 | 38.2080 | C | 0 |
| 43.6020 | 45.4500 | 48.1430 | H | 0 | 57.2290 | 39.7420 | 46.5030 | C | 0 | 62.4800 | 39.8420 | 39.1600 | H | 0 |
| 45.5980 | 45.3090 | 47.1810 | C | 0 | 58.0690 | 39.5430 | 45.7060 | O | 0 | 63.5880 | 38.7770 | 38.5320 | H | 0 |
| 45.8930 | 45.0410 | 46.1670 | H | 0 | 56.9580 | 38.8100 | 47.3480 | N | 0 | 63.1270 | 40.3160 | 37.1000 | C | 0 |
| 45.9000 | 46.7860 | 47.4730 | C | 0 | 56.2020 | 39.0010 | 47.9910 | H | 0 | 63.5400 | 39.7820 | 36.2450 | H | 0 |
| 45.3010 | 47.5020 | 46.9110 | H | 0 | 57.7630 | 37.6460 | 47.7150 | C | 0 | 62.2680 | 40.8520 | 36.6970 | H | 0 |
| 45.5670 | 46.9930 | 48.4910 | H | 0 | 58.7790 | 38.0410 | 47.7010 | H | 0 | 64.2410 | 41.2490 | 37.4920 | N | 0 |
| 47.3330 | 47.1210 | 47.2120 | C | 0 | 57.4880 | 37.1040 | 49.1280 | C | 0 | 65.0500 | 40.6690 | 37.6630 | H | 0 |
| 47.9780 | 46.8390 | 45.9350 | C | 0 | 58.0960 | 37.5260 | 49.9280 | H | 0 | 64.4220 | 41.9280 | 36.7670 | H | 0 |
| 47.4360 | 46.3670 | 45.1290 | H | 0 | 56.4780 | 37.2390 | 49.5150 | H | 0 | 63.9240 | 41.6940 | 38.3420 | H | 0 |
| 49.2800 | 47.2180 | 45.6250 | C | 0 | 57.8710 | 35.6060 | 49.2170 | C | 0 | 60.3020 | 34.8710 | 38.6380 | C | 0 |
| 49.7550 | 47.1410 | 44.6590 | H | 0 | 57.3020 | 35.0710 | 48.4570 | H | 0 | 61.1990 | 34.0910 | 38.2870 | O | 0 |
| 50.0760 | 47.7850 | 46.6700 | C | 0 | 58.9500 | 35.5180 | 49.0930 | H | 0 | 59.3110 | 34.4970 | 39.4340 | N | 0 |
| 51.3990 | 48.0220 | 46.3180 | O | 0 | 57.6180 | 34.9800 | 50.6110 | C | 0 | 58.5920 | 35.1740 | 39.6460 | H | 0 |
| 51.7900 | 48.5690 | 47.0030 | H | 0 | 57.8750 | 33.8000 | 50.6820 | O | 0 | 59.2940 | 33.1700 | 40.1290 | C | 0 |
| 49.5230 | 47.9560 | 47.9640 | C | 0 | 57.0710 | 35.6680 | 51.6760 | N | 0 | 59.8390 | 32.4300 | 39.5430 | H | 0 |
| 50.1570 | 48.2700 | 48.7800 | H | 0 | 57.2150 | 35.3000 | 52.6060 | H | 0 | 59.8480 | 33.3200 | 41.5780 | C | 0 |
| 48.1720 | 47.6080 | 48.1880 | C | 0 | 56.9010 | 36.6620 | 51.6180 | H | 0 | 59.8940 | 32.3030 | 41.9700 | H | 0 |
| 47.8130 | 47.7410 | 49.1980 | H | 0 | 57.5490 | 36.5650 | 46.5870 | C | 0 | 60.8070 | 33.8350 | 41.5270 | H | 0 |
| 46.5060 | 44.4380 | 48.1200 | C | 0 | 58.5040 | 35.9330 | 46.1480 | O | 0 | 59.0850 | 34.1190 | 42.6070 | C | 0 |
| 46.0980 | 44.2400 | 49.2630 | O | 0 | 56.2520 | 36.3950 | 46.1790 | N | 0 | 57.9710 | 34.5380 | 42.4370 | O | 0 |
| 47.8110 | 44.1910 | 47.8200 | N | 0 | 55.5120 | 36.6980 | 46.7960 | H | 0 | 59.6860 | 34.4320 | 43.7210 | N | 0 |
| 48.1530 | 44.6060 | 46.9650 | H | 0 | 55.8420 | 35.8500 | 44.8940 | C | 0 | 59.2690 | 35.0910 | 44.3620 | H | 0 |
| 48.7430 | 43.6980 | 48.7750 | C | 0 | 56.6090 | 35.1900 | 44.4870 | H | 0 | 60.5170 | 33.9740 | 44.0680 | H | 0 |
| 48.4880 | 43.8410 | 49.8250 | H | 0 | 54.4720 | 35.1090 | 44.9900 | C | 0 | 57.9180 | 32.4720 | 40.0530 | C | 0 |
| 48.8360 | 42.1900 | 48.4970 | C | 0 | 53.6490 | 35.7480 | 45.3130 | H | 0 | 57.9490 | 31.3240 | 40.4700 | O | 0 |
| 47.8360 | 41.7560 | 48.5130 | H | 0 | 54.1570 | 34.5350 | 43.4990 | C | 0 | 56.8110 | 33.1080 | 39.7050 | N | 0 |
| 49.2560 | 41.9150 | 47.5300 | H | 0 | 55.0900 | 34.0820 | 43.1660 | H | 0 | 56.8500 | 34.0960 | 39.5000 | H | 0 |
| 49.6190 | 41.6690 | 49.5630 | O | 0 | 53.3270 | 33.8340 | 43.5880 | H | 0 | 55.5030 | 32.4210 | 39.7700 | C | 0 |
| 49.0700 | 41.4920 | 50.3300 | H | 0 | 53.9270 | 35.3990 | 42.8770 | H | 0 | 55.3590 | 31.9530 | 40.7440 | H | 0 |
| 50.0770 | 44.4260 | 48.5230 | C | 0 | 54.5060 | 33.8380 | 45.9130 | C | 0 | 54.4660 | 33.5020 | 39.5530 | C | 0 |
| 50.4670 | 44.6600 | 47.3810 | O | 0 | 55.1620 | 33.0590 | 45.5240 | H | 0 | 54.6360 | 34.2930 | 40.2840 | H | 0 |
| 50.7830 | 44.6940 | 49.6370 | N | 0 | 54.9970 | 34.1620 | 46.8300 | H | 0 | 54.3690 | 34.0650 | 38.0750 | C | 0 |
| 50.2920 | 44.4450 | 50.4830 | H | 0 | 53.1910 | 33.3140 | 46.4650 | C | 0 | 55.3550 | 34.4930 | 37.8950 | H | 0 |
| 52.1190 | 45.2000 | 49.6760 | C | 0 | 52.5270 | 34.1270 | 46.7590 | H | 0 | 54.1170 | 33.2590 | 37.3850 | H | 0 |
| 52.2060 | 45.9410 | 48.8810 | H | 0 | 52.7120 | 32.7030 | 45.7010 | H | 0 | 53.5800 | 34.8140 | 38.0110 | H | 0 |
| 52.4160 | 45.7800 | 51.1090 | C | 0 | 53.4190 | 32.7030 | 47.3380 | H | 0 | 53.0260 | 32.9970 | 39.6900 | C | 0 |
| 52.0380 | 45.0830 | 51.8560 | H | 0 | 55.6850 | 37.0800 | 43.9560 | C | 0 | 52.9090 | 32.7380 | 40.7420 | H | 0 |
| 53.4910 | 45.8940 | 51.2480 | H | 0 | 54.9910 | 38.0190 | 44.3450 | O | 0 | 52.2640 | 33.7510 | 39.4950 | H | 0 |
| 51.7390 | 47.1380 | 51.3060 | C | 0 | 56.3900 | 37.0660 | 42.7960 | N | 0 | 53.0360 | 32.0840 | 39.0940 | H | 0 |
| 52.3310 | 47.7810 | 51.9570 | H | 0 | 56.8600 | 36.1900 | 42.6150 | H | 0 | 55.3370 | 31.2720 | 38.7290 | C | 0 |

|         |         |         |   |   |         |         |         |   |   |         |         |         |   |   |
|---------|---------|---------|---|---|---------|---------|---------|---|---|---------|---------|---------|---|---|
| 54.5500 | 30.3610 | 38.9940 | O | 0 | 51.2070 | 24.7010 | 44.1880 | C | 0 | 38.5360 | 20.3330 | 57.4550 | H | 0 |
| 56.1500 | 31.1170 | 37.6860 | N | 0 | 51.1070 | 25.5920 | 45.0590 | O | 0 | 37.5300 | 22.1110 | 56.6400 | C | 0 |
| 56.8840 | 31.7760 | 37.4720 | H | 0 | 50.4890 | 23.5620 | 44.2550 | N | 0 | 36.6750 | 22.2000 | 57.2930 | H | 0 |
| 56.0460 | 29.9880 | 36.7500 | C | 0 | 50.7070 | 22.8720 | 43.5500 | H | 0 | 37.6910 | 23.1820 | 55.7270 | C | 0 |
| 55.0430 | 30.0590 | 36.3290 | H | 0 | 49.3390 | 23.3750 | 45.1800 | C | 0 | 37.0080 | 24.0180 | 55.7670 | H | 0 |
| 57.0140 | 30.0940 | 35.6050 | C | 0 | 48.9090 | 24.3740 | 45.2600 | H | 0 | 38.6780 | 23.2020 | 54.7670 | C | 0 |
| 58.0630 | 29.9840 | 35.8800 | H | 0 | 48.3190 | 22.4770 | 44.4780 | C | 0 | 38.6810 | 24.0360 | 54.0800 | H | 0 |
| 56.8690 | 29.2530 | 34.9260 | H | 0 | 48.1360 | 22.8660 | 43.4770 | H | 0 | 38.7450 | 20.9200 | 52.0080 | C | 0 |
| 56.9480 | 31.3140 | 34.8050 | O | 0 | 48.6510 | 21.4490 | 44.3260 | H | 0 | 38.2190 | 21.8680 | 51.3220 | O | 0 |
| 56.2980 | 31.2840 | 34.0990 | H | 0 | 46.9720 | 22.4030 | 45.2950 | C | 0 | 38.1250 | 19.7450 | 52.3050 | N | 0 |
| 56.1060 | 28.6330 | 37.4510 | C | 0 | 47.3230 | 22.2650 | 46.3180 | H | 0 | 38.5580 | 18.9420 | 52.7380 | H | 0 |
| 55.5800 | 27.7040 | 36.8160 | O | 0 | 46.1920 | 23.6690 | 45.2050 | C | 0 | 36.6780 | 19.6280 | 51.9550 | C | 0 |
| 56.6600 | 28.4620 | 38.6820 | N | 0 | 46.9490 | 24.4170 | 45.4390 | H | 0 | 36.4600 | 20.1210 | 51.0080 | H | 0 |
| 56.9910 | 29.2830 | 39.1690 | H | 0 | 45.7720 | 23.7780 | 44.2050 | H | 0 | 36.2870 | 18.1940 | 51.5810 | C | 0 |
| 56.7520 | 27.1740 | 39.4480 | C | 0 | 45.4650 | 23.5720 | 46.0120 | H | 0 | 36.9320 | 17.9320 | 50.7420 | H | 0 |
| 56.4040 | 26.3570 | 38.8150 | H | 0 | 46.0210 | 21.2750 | 44.7840 | C | 0 | 36.5090 | 17.4780 | 52.3730 | H | 0 |
| 58.2190 | 26.8410 | 39.7540 | C | 0 | 46.4090 | 20.2870 | 45.0320 | H | 0 | 34.9540 | 18.1130 | 51.2690 | O | 0 |
| 58.1660 | 26.0130 | 40.4610 | H | 0 | 45.0870 | 21.3180 | 45.3440 | H | 0 | 34.8270 | 18.4540 | 50.3810 | H | 0 |
| 58.6900 | 26.5250 | 38.8230 | H | 0 | 45.8340 | 21.4260 | 43.7210 | H | 0 | 35.7350 | 20.0730 | 53.0920 | C | 0 |
| 59.0920 | 27.8870 | 40.4460 | C | 0 | 49.7740 | 22.9470 | 46.5360 | C | 0 | 35.7440 | 19.4750 | 54.1460 | O | 0 |
| 59.0160 | 28.8430 | 39.9280 | H | 0 | 50.3840 | 21.8690 | 46.6660 | O | 0 | 34.9940 | 21.1890 | 52.7990 | N | 0 |
| 58.7720 | 28.1230 | 41.4620 | H | 0 | 49.6530 | 23.7580 | 47.5670 | N | 0 | 35.0850 | 21.4340 | 51.8230 | H | 0 |
| 60.5430 | 27.5060 | 40.6290 | C | 0 | 49.2610 | 24.6780 | 47.4270 | H | 0 | 34.1450 | 21.8400 | 53.7750 | C | 0 |
| 60.9750 | 27.4120 | 39.6330 | H | 0 | 50.1840 | 23.4610 | 48.9060 | C | 0 | 34.7170 | 22.0950 | 54.6670 | H | 0 |
| 61.0290 | 28.3720 | 41.0780 | H | 0 | 51.1920 | 23.0640 | 48.7840 | H | 0 | 33.7450 | 23.2440 | 53.1700 | C | 0 |
| 60.6130 | 26.2490 | 41.3460 | N | 0 | 50.4560 | 24.7550 | 49.6530 | C | 0 | 33.2330 | 23.8260 | 53.9350 | H | 0 |
| 60.2570 | 26.2110 | 42.2900 | H | 0 | 51.0890 | 25.4200 | 49.0660 | H | 0 | 34.9410 | 24.1080 | 52.7620 | C | 0 |
| 60.9830 | 25.0640 | 40.8620 | C | 0 | 49.5310 | 25.3230 | 49.7650 | H | 0 | 35.1870 | 23.7640 | 51.7570 | H | 0 |
| 61.5120 | 24.9380 | 39.6680 | N | 0 | 50.8810 | 24.5780 | 50.6410 | H | 0 | 34.8380 | 25.1880 | 52.8630 | H | 0 |
| 61.8040 | 25.7870 | 39.2050 | H | 0 | 49.2600 | 22.4830 | 49.7090 | C | 0 | 35.8060 | 23.8320 | 53.3650 | H | 0 |
| 61.8710 | 24.0820 | 39.2690 | H | 0 | 49.7660 | 21.4520 | 50.1610 | O | 0 | 32.8480 | 23.1430 | 52.0590 | O | 0 |
| 60.9780 | 23.9830 | 41.6020 | N | 0 | 47.9100 | 22.7540 | 49.6950 | N | 0 | 33.3190 | 22.7560 | 51.3180 | H | 0 |
| 60.7510 | 24.0340 | 42.5850 | H | 0 | 47.5590 | 23.6120 | 49.2950 | H | 0 | 32.9800 | 20.9740 | 54.1670 | C | 0 |
| 61.3580 | 23.0920 | 41.3150 | H | 0 | 46.8730 | 21.8680 | 50.1780 | C | 0 | 32.3470 | 21.3850 | 55.1670 | O | 0 |
| 55.8740 | 27.1840 | 40.7000 | C | 0 | 46.9830 | 20.9000 | 49.6890 | H | 0 | 32.6570 | 19.8050 | 53.5760 | N | 0 |
| 56.1710 | 26.6290 | 41.7160 | O | 0 | 46.9240 | 21.6530 | 51.7010 | C | 0 | 33.1790 | 19.5420 | 52.7530 | H | 0 |
| 54.7240 | 27.8800 | 40.6380 | N | 0 | 46.1330 | 20.9800 | 52.0320 | H | 0 | 31.3760 | 19.1150 | 53.7630 | C | 0 |
| 54.5270 | 28.4050 | 39.7980 | H | 0 | 47.8610 | 21.1110 | 51.8260 | H | 0 | 31.3670 | 18.2090 | 53.1580 | H | 0 |
| 53.7360 | 27.8910 | 41.6480 | C | 0 | 47.1480 | 22.8510 | 52.5440 | C | 0 | 31.3660 | 18.8960 | 54.8310 | H | 0 |
| 54.1580 | 27.9210 | 42.6520 | H | 0 | 48.3870 | 23.3900 | 52.8580 | C | 0 | 30.0530 | 19.8930 | 53.4670 | C | 0 |
| 52.9440 | 29.1730 | 41.5400 | C | 0 | 49.3570 | 22.9720 | 52.6340 | H | 0 | 29.1250 | 19.7760 | 54.2470 | O | 0 |
| 53.6840 | 29.9710 | 41.6020 | H | 0 | 48.1850 | 24.6170 | 53.4160 | N | 0 | 29.9680 | 20.6680 | 52.3980 | N | 0 |
| 52.4180 | 29.2230 | 40.5860 | H | 0 | 48.9470 | 25.1450 | 53.8180 | H | 0 | 30.8210 | 20.7060 | 51.8590 | H | 0 |
| 51.7210 | 29.4460 | 42.5230 | C | 0 | 46.8430 | 24.7650 | 53.7850 | C | 0 | 28.8520 | 21.2070 | 51.6630 | C | 0 |
| 50.8770 | 28.7560 | 42.5400 | H | 0 | 46.2220 | 25.8170 | 54.4550 | C | 0 | 28.1630 | 20.3770 | 51.5050 | H | 0 |
| 52.1340 | 29.3670 | 43.9890 | C | 0 | 46.7070 | 26.6170 | 54.9960 | H | 0 | 28.1830 | 22.4110 | 52.3670 | C | 0 |
| 53.0940 | 29.8780 | 44.0620 | H | 0 | 44.7820 | 25.6490 | 54.5700 | C | 0 | 27.3740 | 22.8980 | 51.8230 | H | 0 |
| 51.3670 | 29.7890 | 44.6380 | H | 0 | 44.2280 | 26.4060 | 55.1050 | H | 0 | 27.7530 | 21.9570 | 53.2600 | H | 0 |
| 52.2690 | 28.3070 | 44.2040 | H | 0 | 44.1780 | 24.6270 | 53.8640 | C | 0 | 28.9550 | 23.1560 | 52.5560 | H | 0 |
| 51.0760 | 30.8010 | 42.2270 | C | 0 | 43.1040 | 24.5320 | 53.7980 | H | 0 | 29.3200 | 21.6660 | 50.2630 | C | 0 |
| 51.8290 | 31.5780 | 42.3570 | H | 0 | 44.8120 | 23.6810 | 53.0720 | C | 0 | 30.5830 | 21.7150 | 50.0310 | O | 0 |
| 50.6700 | 30.8680 | 41.2180 | H | 0 | 44.2920 | 22.9030 | 52.5320 | H | 0 | 28.4060 | 21.9740 | 49.3680 | N | 0 |
| 50.2520 | 30.8980 | 42.9340 | H | 0 | 46.1950 | 23.7510 | 52.9950 | C | 0 | 27.4570 | 21.8220 | 49.6800 | H | 0 |
| 52.8840 | 26.6120 | 41.6080 | C | 0 | 45.4890 | 22.3530 | 49.7500 | C | 0 | 28.5890 | 22.0960 | 47.8960 | C | 0 |
| 52.4870 | 26.1140 | 40.5760 | O | 0 | 45.2970 | 23.4760 | 49.3730 | O | 0 | 29.6480 | 22.1630 | 47.6470 | H | 0 |
| 52.6800 | 26.0250 | 42.8000 | N | 0 | 44.5080 | 21.5360 | 50.0130 | N | 0 | 27.8730 | 20.9280 | 47.1490 | C | 0 |
| 53.0900 | 26.5400 | 43.5660 | H | 0 | 44.7220 | 20.5790 | 50.2560 | H | 0 | 27.3720 | 20.2980 | 47.8830 | H | 0 |
| 52.1920 | 24.6970 | 43.0280 | C | 0 | 43.0750 | 21.7610 | 49.8980 | C | 0 | 27.1300 | 21.3640 | 46.4800 | H | 0 |
| 51.5910 | 24.3870 | 42.1730 | H | 0 | 43.0110 | 22.7770 | 50.2860 | H | 0 | 28.7480 | 19.9670 | 46.3520 | C | 0 |
| 53.3110 | 23.6740 | 43.2730 | C | 0 | 42.5820 | 21.5120 | 48.4580 | C | 0 | 29.1120 | 20.6020 | 45.5450 | H | 0 |
| 52.9380 | 22.6580 | 43.4120 | H | 0 | 41.5240 | 21.7700 | 48.4120 | H | 0 | 29.7940 | 19.3510 | 47.2100 | C | 0 |
| 53.8920 | 23.5360 | 42.3620 | H | 0 | 43.1790 | 22.0770 | 47.7430 | H | 0 | 29.3710 | 18.6310 | 47.9110 | H | 0 |
| 54.2860 | 23.9450 | 44.4110 | C | 0 | 42.4890 | 20.1280 | 48.2630 | O | 0 | 30.4510 | 18.7870 | 46.5470 | H | 0 |
| 55.1070 | 23.2740 | 44.1610 | H | 0 | 41.7500 | 19.9450 | 47.6790 | H | 0 | 30.4100 | 20.0230 | 47.8070 | H | 0 |
| 54.5880 | 24.9920 | 44.4100 | H | 0 | 42.3240 | 20.9870 | 51.0000 | C | 0 | 27.9480 | 18.7570 | 45.7520 | C | 0 |
| 53.9890 | 23.5760 | 45.8690 | C | 0 | 42.8310 | 20.0820 | 51.6890 | O | 0 | 28.5560 | 17.8840 | 45.5170 | H | 0 |
| 53.0660 | 24.0700 | 46.1700 | H | 0 | 41.0890 | 21.4280 | 51.2990 | N | 0 | 27.2610 | 18.4580 | 46.5440 | H | 0 |
| 54.0570 | 22.4940 | 45.9820 | H | 0 | 40.7870 | 22.2290 | 50.7630 | H | 0 | 27.3200 | 19.1370 | 44.9450 | H | 0 |
| 54.9050 | 24.1280 | 46.8330 | N | 0 | 40.2490 | 21.0520 | 52.4360 | C | 0 | 27.8690 | 23.4010 | 47.3810 | C | 0 |
| 55.4060 | 24.9600 | 46.5580 | H | 0 | 40.6370 | 20.0710 | 52.7110 | H | 0 | 26.8030 | 23.8190 | 47.8940 | O | 0 |
| 55.0630 | 23.8150 | 48.0980 | C | 0 | 40.5390 | 22.0320 | 53.5600 | C | 0 | 28.3170 | 23.7760 | 46.1990 | N | 0 |
| 54.5050 | 22.8320 | 48.7440 | N | 0 | 41.5190 | 21.7410 | 53.9370 | H | 0 | 29.1840 | 23.3770 | 45.8680 | H | 0 |
| 53.9730 | 22.1040 | 48.2890 | H | 0 | 40.6060 | 23.0280 | 53.1220 | H | 0 | 27.8330 | 24.8290 | 45.2270 | C | 0 |
| 54.5490 | 22.7420 | 49.7490 | H | 0 | 39.5860 | 22.1550 | 54.7240 | C | 0 | 28.7620 | 25.1620 | 44.7630 | H | 0 |
| 55.8660 | 24.5720 | 48.8460 | N | 0 | 39.5740 | 21.1890 | 55.7710 | C | 0 | 26.8890 | 24.1530 | 44.1890 | C | 0 |
| 56.3600 | 25.3390 | 48.4130 | H | 0 | 40.2600 | 20.3590 | 55.6870 | H | 0 | 26.5560 | 24.8910 | 43.4600 | H | 0 |
| 56.2620 | 24.2350 | 49.7130 | H | 0 | 38.5350 | 21.1100 | 56.7050 | C | 0 | 27.3970 | 23.3700 | 43.6250 | H | 0 |

|         |         |         |   |   |         |         |         |   |   |         |         |         |   |   |
|---------|---------|---------|---|---|---------|---------|---------|---|---|---------|---------|---------|---|---|
| 25.5850 | 23.6650 | 44.7840 | C | 0 | 40.3810 | 32.2830 | 53.5800 | C | 0 | 47.1980 | 31.2710 | 62.7390 | C | 0 |
| 25.8380 | 23.0970 | 45.6780 | H | 0 | 41.2880 | 32.8870 | 53.5900 | H | 0 | 47.2650 | 30.0410 | 62.7020 | O | 0 |
| 24.9430 | 24.5090 | 45.0370 | H | 0 | 40.4350 | 31.5830 | 54.4130 | H | 0 | 46.0070 | 31.8930 | 62.5860 | N | 0 |
| 24.8180 | 22.7710 | 43.8260 | C | 0 | 39.1240 | 33.1600 | 53.6990 | C | 0 | 45.9530 | 32.8950 | 62.4750 | H | 0 |
| 24.5570 | 23.2750 | 42.8940 | H | 0 | 38.4130 | 32.6080 | 54.3140 | H | 0 | 44.7650 | 31.1940 | 62.3300 | C | 0 |
| 25.4720 | 21.9330 | 43.5840 | H | 0 | 39.6080 | 34.4720 | 54.3220 | C | 0 | 44.9670 | 30.1330 | 62.1820 | H | 0 |
| 23.6050 | 22.2720 | 44.4970 | N | 0 | 40.0060 | 35.4370 | 53.6650 | O | 0 | 43.8370 | 31.3770 | 63.5880 | C | 0 |
| 23.7090 | 21.4550 | 45.0820 | H | 0 | 39.7350 | 34.3840 | 55.6830 | N | 0 | 43.5230 | 32.4190 | 63.5200 | H | 0 |
| 22.3660 | 22.7570 | 44.3390 | C | 0 | 39.1610 | 33.6790 | 56.1220 | H | 0 | 42.6660 | 30.4160 | 63.6780 | C | 0 |
| 22.1360 | 23.7970 | 43.5850 | N | 0 | 40.4930 | 35.3140 | 56.5830 | C | 0 | 41.9600 | 30.6340 | 62.8770 | H | 0 |
| 22.8050 | 24.1550 | 42.9190 | H | 0 | 40.8380 | 36.2120 | 56.0700 | H | 0 | 42.9540 | 29.3810 | 63.4950 | H | 0 |
| 21.1670 | 24.0800 | 43.6200 | H | 0 | 39.6860 | 35.7400 | 57.7910 | C | 0 | 42.1010 | 30.4660 | 64.6090 | H | 0 |
| 21.3420 | 22.2200 | 44.9640 | N | 0 | 39.8450 | 34.9340 | 58.5070 | H | 0 | 44.6600 | 31.2310 | 64.7110 | O | 0 |
| 21.4750 | 21.5550 | 45.7120 | H | 0 | 40.2290 | 36.6060 | 58.1680 | H | 0 | 44.3760 | 31.9850 | 65.2330 | H | 0 |
| 20.5340 | 22.8120 | 45.0940 | H | 0 | 38.1820 | 36.0650 | 57.6680 | C | 0 | 44.0760 | 31.7070 | 61.1200 | C | 0 |
| 27.3210 | 26.2270 | 45.7510 | C | 0 | 37.6970 | 35.2170 | 57.1830 | H | 0 | 43.6010 | 32.8150 | 61.0880 | O | 0 |
| 26.3510 | 26.8360 | 45.2040 | O | 0 | 37.5700 | 36.4520 | 58.9480 | C | 0 | 44.0030 | 30.8780 | 60.1230 | N | 0 |
| 27.9390 | 26.8230 | 46.7860 | N | 0 | 37.9830 | 37.3720 | 59.3610 | H | 0 | 44.4870 | 30.0010 | 60.2550 | H | 0 |
| 28.6850 | 26.3090 | 47.2320 | H | 0 | 36.4970 | 36.4600 | 58.7550 | H | 0 | 42.9500 | 31.0070 | 59.1020 | C | 0 |
| 27.5830 | 28.2070 | 47.3000 | C | 0 | 37.7140 | 35.6550 | 59.6770 | H | 0 | 43.0740 | 32.0510 | 58.8140 | H | 0 |
| 27.1670 | 28.7200 | 46.4340 | H | 0 | 38.1170 | 37.1980 | 56.6910 | C | 0 | 43.2700 | 30.0370 | 57.8970 | C | 0 |
| 26.7630 | 28.0660 | 48.0050 | H | 0 | 38.7960 | 38.0160 | 56.9340 | H | 0 | 44.3350 | 30.0150 | 57.6650 | H | 0 |
| 28.7890 | 29.0250 | 47.8720 | C | 0 | 38.3840 | 36.8630 | 55.6880 | H | 0 | 42.9440 | 29.0350 | 58.1740 | H | 0 |
| 28.6070 | 29.9610 | 48.6180 | O | 0 | 37.1290 | 37.6570 | 56.6810 | H | 0 | 42.4210 | 30.4240 | 56.7290 | C | 0 |
| 30.0170 | 28.6050 | 47.5850 | N | 0 | 41.7460 | 34.5970 | 57.2250 | C | 0 | 41.3900 | 30.2470 | 57.0360 | H | 0 |
| 30.2290 | 27.7640 | 47.0660 | H | 0 | 41.7620 | 33.3520 | 57.2490 | O | 0 | 42.6350 | 31.4400 | 56.3970 | H | 0 |
| 31.2860 | 29.0840 | 48.2540 | C | 0 | 42.7070 | 35.3600 | 57.6130 | N | 0 | 42.4780 | 29.2350 | 55.3390 | S | 0 |
| 31.0620 | 29.3600 | 49.2840 | H | 0 | 42.5440 | 36.3470 | 57.4780 | H | 0 | 43.8130 | 29.9260 | 54.2980 | C | 0 |
| 32.2420 | 27.8520 | 48.3120 | C | 0 | 43.9810 | 34.9640 | 58.2430 | C | 0 | 44.4450 | 30.4990 | 54.9770 | H | 0 |
| 32.5490 | 27.5720 | 47.3040 | H | 0 | 43.7910 | 34.0560 | 58.8150 | H | 0 | 44.3410 | 29.1020 | 53.8180 | H | 0 |
| 33.1500 | 28.1170 | 48.8530 | H | 0 | 45.1100 | 34.9540 | 57.2160 | C | 0 | 43.3630 | 30.5200 | 53.5020 | H | 0 |
| 31.6630 | 26.6910 | 48.9890 | C | 0 | 45.3690 | 35.9430 | 56.8370 | H | 0 | 41.5230 | 30.7840 | 59.6600 | C | 0 |
| 30.6490 | 25.9390 | 48.5840 | N | 0 | 46.2550 | 34.2190 | 58.0020 | C | 0 | 41.2860 | 29.9380 | 60.5090 | O | 0 |
| 30.4970 | 24.9600 | 49.4800 | C | 0 | 47.0960 | 33.9690 | 57.3540 | H | 0 | 40.5500 | 31.3900 | 58.9820 | N | 0 |
| 29.7820 | 24.1580 | 49.3660 | H | 0 | 46.6860 | 34.8720 | 58.7600 | H | 0 | 40.9140 | 31.8570 | 58.1640 | H | 0 |
| 31.3840 | 25.0650 | 50.4830 | N | 0 | 45.9530 | 33.2640 | 58.4330 | H | 0 | 39.1270 | 31.1250 | 59.0880 | C | 0 |
| 31.6060 | 24.3480 | 51.1590 | H | 0 | 44.8610 | 34.0380 | 56.0070 | C | 0 | 38.9910 | 30.1410 | 59.5360 | H | 0 |
| 32.0640 | 26.2360 | 50.2020 | C | 0 | 43.8920 | 34.1610 | 55.5230 | H | 0 | 38.4800 | 32.2530 | 59.9610 | C | 0 |
| 32.8850 | 26.6520 | 50.7680 | H | 0 | 45.6940 | 34.2390 | 55.3320 | H | 0 | 38.4170 | 33.1950 | 59.4180 | H | 0 |
| 31.7520 | 30.3240 | 47.4770 | C | 0 | 44.9870 | 32.9990 | 56.3100 | H | 0 | 37.4400 | 32.0020 | 60.1740 | H | 0 |
| 32.9240 | 30.4380 | 47.1020 | O | 0 | 44.4190 | 35.9880 | 59.3320 | C | 0 | 39.0880 | 32.5040 | 61.3060 | C | 0 |
| 30.9390 | 31.3730 | 47.4720 | N | 0 | 44.9180 | 37.0490 | 59.0670 | O | 0 | 38.5970 | 31.9300 | 62.4910 | C | 0 |
| 30.0630 | 31.2690 | 47.9630 | H | 0 | 44.3540 | 35.6050 | 60.6130 | N | 0 | 37.7530 | 31.2710 | 62.3520 | H | 0 |
| 31.3690 | 32.7210 | 47.1530 | C | 0 | 43.9900 | 34.6670 | 60.6990 | H | 0 | 39.1690 | 32.2140 | 63.7410 | C | 0 |
| 32.1730 | 32.7100 | 46.4170 | H | 0 | 44.6320 | 36.3950 | 61.8070 | C | 0 | 38.7760 | 31.7420 | 64.6300 | H | 0 |
| 30.1980 | 33.4610 | 46.5530 | C | 0 | 45.2460 | 37.2590 | 61.5540 | H | 0 | 40.2670 | 33.0740 | 63.8600 | C | 0 |
| 29.2960 | 33.3760 | 47.1590 | H | 0 | 43.2790 | 37.0020 | 62.4180 | C | 0 | 40.9350 | 33.2890 | 65.0760 | O | 0 |
| 30.4050 | 34.5310 | 46.5300 | H | 0 | 42.6950 | 36.2480 | 62.9460 | H | 0 | 40.3650 | 32.9730 | 65.7810 | H | 0 |
| 29.9120 | 33.0640 | 45.0820 | C | 0 | 43.6180 | 38.1560 | 63.2900 | C | 0 | 40.8080 | 33.6180 | 62.6480 | C | 0 |
| 30.8010 | 33.0610 | 44.4510 | H | 0 | 44.3370 | 37.8940 | 64.0670 | H | 0 | 41.6680 | 34.2670 | 62.7330 | H | 0 |
| 29.6050 | 32.0240 | 45.1960 | H | 0 | 44.0450 | 39.0000 | 62.7470 | H | 0 | 40.2000 | 33.3750 | 61.3910 | C | 0 |
| 28.7900 | 34.0070 | 44.5570 | C | 0 | 42.7360 | 38.4730 | 63.8460 | H | 0 | 40.5980 | 33.9720 | 60.5840 | H | 0 |
| 29.0370 | 35.2200 | 44.5380 | O | 0 | 42.3310 | 37.5710 | 61.3490 | C | 0 | 38.4650 | 30.9280 | 57.6640 | C | 0 |
| 27.7820 | 33.5240 | 44.0700 | O | 0 | 42.8730 | 38.2960 | 60.7410 | H | 0 | 39.0000 | 31.3910 | 56.6190 | O | 0 |
| 32.0340 | 33.4100 | 48.4180 | C | 0 | 41.8930 | 36.7670 | 60.7570 | H | 0 | 37.3090 | 30.2210 | 57.5710 | N | 0 |
| 31.8160 | 32.9600 | 49.5470 | O | 0 | 41.4870 | 37.9750 | 61.9090 | H | 0 | 36.8640 | 29.8670 | 58.4060 | H | 0 |
| 32.7160 | 34.5650 | 48.2240 | N | 0 | 45.4320 | 35.5780 | 62.8000 | C | 0 | 36.7400 | 29.8310 | 56.2770 | C | 0 |
| 32.9070 | 34.8540 | 47.2750 | H | 0 | 45.0990 | 34.4720 | 63.1090 | O | 0 | 36.7410 | 30.7450 | 55.6840 | H | 0 |
| 33.5740 | 35.1180 | 49.3080 | C | 0 | 46.5360 | 36.2030 | 63.1600 | N | 0 | 37.5700 | 28.7670 | 55.5010 | C | 0 |
| 33.6880 | 36.1880 | 49.1320 | H | 0 | 46.7760 | 37.1180 | 62.8050 | H | 0 | 38.2000 | 29.3760 | 54.8520 | H | 0 |
| 33.1690 | 34.9020 | 50.2960 | H | 0 | 47.5030 | 35.5670 | 64.0700 | C | 0 | 38.4350 | 27.8290 | 56.3690 | C | 0 |
| 34.9150 | 34.4610 | 49.3520 | C | 0 | 48.2500 | 36.2640 | 64.4500 | H | 0 | 37.9010 | 27.4750 | 57.2520 | H | 0 |
| 35.3240 | 33.8290 | 48.3970 | O | 0 | 46.9420 | 35.1630 | 64.9130 | H | 0 | 38.7960 | 27.0090 | 55.7480 | H | 0 |
| 35.6620 | 34.5460 | 50.4800 | N | 0 | 48.2990 | 34.5070 | 63.2760 | C | 0 | 39.3240 | 28.3180 | 56.7660 | H | 0 |
| 35.3450 | 35.2070 | 51.1750 | H | 0 | 48.8550 | 34.8180 | 62.1690 | O | 0 | 36.7360 | 27.8370 | 54.4990 | C | 0 |
| 37.0310 | 34.0460 | 50.5240 | C | 0 | 48.2220 | 33.2850 | 63.8380 | N | 0 | 36.2090 | 27.1140 | 55.1210 | H | 0 |
| 37.1250 | 33.0780 | 50.0320 | H | 0 | 47.7560 | 33.1930 | 64.7290 | H | 0 | 36.0670 | 28.4340 | 53.8780 | H | 0 |
| 37.6210 | 34.8090 | 50.0170 | H | 0 | 48.4670 | 31.9990 | 63.1440 | C | 0 | 37.3910 | 27.2820 | 53.8270 | H | 0 |
| 37.4410 | 33.8980 | 52.0140 | C | 0 | 48.6940 | 32.3750 | 62.1460 | H | 0 | 35.2330 | 29.4200 | 56.5650 | C | 0 |
| 36.6040 | 34.2110 | 52.8560 | O | 0 | 49.6550 | 31.1230 | 63.6290 | C | 0 | 34.9260 | 28.8970 | 57.6610 | O | 0 |
| 38.6570 | 33.3300 | 52.2880 | N | 0 | 49.9070 | 30.3920 | 62.8610 | H | 0 | 34.3350 | 29.7870 | 55.6250 | N | 0 |
| 39.5470 | 32.4900 | 51.3880 | C | 0 | 50.9200 | 31.9000 | 63.6700 | C | 0 | 34.6660 | 30.3110 | 54.8280 | H | 0 |
| 40.2600 | 33.2190 | 51.0030 | H | 0 | 51.8000 | 31.2740 | 63.8160 | H | 0 | 32.8830 | 29.3430 | 55.6570 | C | 0 |
| 38.9080 | 31.9680 | 50.6750 | H | 0 | 51.0180 | 32.4710 | 62.7470 | H | 0 | 32.6400 | 29.1530 | 56.7020 | H | 0 |
| 40.2140 | 31.4470 | 52.2670 | C | 0 | 50.8040 | 32.6620 | 64.4410 | H | 0 | 31.9960 | 30.5590 | 55.2420 | C | 0 |
| 41.1110 | 30.9300 | 51.9230 | H | 0 | 49.4580 | 30.4930 | 64.8120 | O | 0 | 30.9270 | 30.3580 | 55.3180 | H | 0 |
| 39.4670 | 30.6710 | 52.4370 | H | 0 | 48.8510 | 29.7620 | 64.6720 | H | 0 | 32.1370 | 31.2600 | 56.0650 | H | 0 |

|         |         |         |   |   |         |         |         |   |   |         |         |         |   |   |
|---------|---------|---------|---|---|---------|---------|---------|---|---|---------|---------|---------|---|---|
| 32.4510 | 31.2710 | 54.0050 | C | 0 | 27.0840 | 28.9900 | 54.4240 | H | 0 | 40.6510 | 24.9730 | 56.7240 | H | 0 |
| 33.3590 | 32.2910 | 53.9490 | N | 0 | 27.8350 | 26.9300 | 58.1020 | C | 0 | 41.3990 | 26.4250 | 56.7870 | H | 0 |
| 33.4770 | 32.6470 | 52.7060 | C | 0 | 28.2180 | 27.7480 | 58.9890 | O | 0 | 42.4300 | 24.9580 | 56.8980 | H | 0 |
| 33.8870 | 33.5900 | 52.3750 | H | 0 | 28.3280 | 25.6740 | 58.1120 | N | 0 | 41.4270 | 24.0330 | 59.3450 | C | 0 |
| 32.5860 | 31.9050 | 51.9300 | N | 0 | 28.0320 | 25.0870 | 57.3460 | H | 0 | 41.0840 | 24.1650 | 60.3710 | H | 0 |
| 32.1990 | 32.2570 | 51.0660 | H | 0 | 29.5690 | 25.3820 | 58.8160 | C | 0 | 40.7350 | 23.3580 | 58.8410 | H | 0 |
| 31.9490 | 31.0250 | 52.7730 | C | 0 | 29.3050 | 25.4790 | 59.8690 | H | 0 | 42.4420 | 23.6430 | 59.4210 | H | 0 |
| 31.0780 | 30.4390 | 52.5190 | H | 0 | 30.0670 | 23.9630 | 58.5920 | C | 0 | 44.0080 | 26.9820 | 61.3020 | C | 0 |
| 32.6380 | 28.0150 | 54.8700 | C | 0 | 30.9710 | 23.9790 | 57.9830 | H | 0 | 44.4130 | 28.0040 | 60.7870 | O | 0 |
| 33.5640 | 27.2180 | 54.4800 | O | 0 | 30.3000 | 23.5070 | 59.5540 | H | 0 | 44.4880 | 26.5200 | 62.4830 | N | 0 |
| 31.3560 | 27.8080 | 54.5910 | N | 0 | 29.1540 | 22.9980 | 57.9050 | C | 0 | 44.2550 | 25.5660 | 62.7170 | H | 0 |
| 30.7590 | 28.5720 | 54.8720 | H | 0 | 28.0400 | 22.4170 | 58.4880 | N | 0 | 45.7760 | 26.9860 | 63.0700 | C | 0 |
| 30.6760 | 26.9100 | 53.5930 | C | 0 | 27.5320 | 21.5390 | 57.6420 | C | 0 | 45.7750 | 28.0740 | 63.0000 | H | 0 |
| 31.4210 | 26.8550 | 52.7990 | H | 0 | 26.5850 | 21.0400 | 57.7870 | H | 0 | 45.9130 | 26.5460 | 64.5020 | C | 0 |
| 30.4960 | 25.5420 | 54.1830 | C | 0 | 28.2890 | 21.5600 | 56.4680 | N | 0 | 45.1350 | 27.0760 | 65.0520 | H | 0 |
| 30.1160 | 24.7890 | 53.4930 | H | 0 | 28.1490 | 20.9630 | 55.6660 | H | 0 | 45.5160 | 25.5330 | 64.5620 | H | 0 |
| 31.4780 | 25.2610 | 54.5630 | H | 0 | 29.2600 | 22.4570 | 56.6450 | C | 0 | 47.2310 | 26.7790 | 65.2250 | C | 0 |
| 29.6600 | 25.6480 | 55.3490 | O | 0 | 30.0730 | 22.5750 | 55.9440 | H | 0 | 47.8820 | 27.8280 | 64.8580 | O | 0 |
| 30.1580 | 26.0340 | 56.0740 | H | 0 | 30.7180 | 26.3850 | 58.5570 | C | 0 | 47.5930 | 26.0190 | 66.1250 | O | 0 |
| 29.3350 | 27.4330 | 53.0530 | C | 0 | 30.9310 | 26.8980 | 57.4760 | O | 0 | 46.9230 | 26.5180 | 62.1130 | C | 0 |
| 28.6610 | 28.2960 | 53.6770 | O | 0 | 31.4850 | 26.5410 | 59.6870 | N | 0 | 47.1260 | 25.3180 | 61.7640 | O | 0 |
| 28.7470 | 26.8650 | 51.9890 | N | 0 | 31.1700 | 26.1950 | 60.5820 | H | 0 | 47.8910 | 27.4190 | 61.9540 | N | 0 |
| 29.2170 | 26.2130 | 51.3770 | H | 0 | 32.6240 | 27.4940 | 59.7890 | C | 0 | 47.7890 | 28.2380 | 62.5350 | H | 0 |
| 27.3190 | 26.9800 | 51.7080 | C | 0 | 32.9500 | 27.5480 | 58.7500 | H | 0 | 49.0750 | 27.2750 | 61.0350 | C | 0 |
| 27.0400 | 28.0320 | 51.6490 | H | 0 | 32.3230 | 28.7960 | 60.5400 | C | 0 | 48.9420 | 26.3540 | 60.4680 | H | 0 |
| 27.1270 | 26.1650 | 50.4170 | C | 0 | 32.2950 | 28.5490 | 61.6010 | H | 0 | 49.0890 | 28.4440 | 60.0590 | C | 0 |
| 27.3120 | 25.1220 | 50.6760 | H | 0 | 33.4510 | 29.7540 | 60.4000 | C | 0 | 49.5900 | 29.2540 | 60.5890 | H | 0 |
| 26.1780 | 26.2500 | 49.8870 | H | 0 | 34.4280 | 29.3570 | 60.6750 | H | 0 | 49.7040 | 28.1440 | 59.2100 | H | 0 |
| 27.9030 | 26.5150 | 49.7360 | H | 0 | 33.5440 | 30.0260 | 59.3490 | H | 0 | 47.7750 | 28.9280 | 59.5550 | C | 0 |
| 26.4200 | 26.4680 | 52.8980 | C | 0 | 33.2870 | 30.7170 | 60.8820 | H | 0 | 47.1610 | 29.3550 | 60.3470 | H | 0 |
| 26.8630 | 25.7690 | 53.8110 | O | 0 | 30.9980 | 29.4610 | 60.2130 | C | 0 | 47.9680 | 30.1470 | 58.6190 | C | 0 |
| 25.0920 | 26.6240 | 52.8060 | N | 0 | 31.2120 | 29.9460 | 59.2610 | H | 0 | 48.1440 | 31.0150 | 59.2540 | H | 0 |
| 24.7800 | 27.1140 | 51.9800 | H | 0 | 30.1720 | 28.7610 | 60.0890 | H | 0 | 48.8460 | 29.9390 | 58.0080 | H | 0 |
| 24.0230 | 26.1580 | 53.7130 | C | 0 | 30.7730 | 30.2770 | 60.9000 | H | 0 | 47.0940 | 30.3290 | 57.9930 | H | 0 |
| 24.0810 | 26.6590 | 54.6790 | H | 0 | 33.7850 | 26.6920 | 60.4600 | C | 0 | 46.9740 | 27.8190 | 58.8370 | C | 0 |
| 22.6930 | 26.6500 | 53.1830 | C | 0 | 33.5500 | 25.7670 | 61.2300 | O | 0 | 46.6750 | 26.9710 | 59.4530 | H | 0 |
| 22.7470 | 27.7360 | 53.1070 | H | 0 | 34.9930 | 26.9690 | 59.9940 | N | 0 | 46.1030 | 28.3460 | 58.4480 | H | 0 |
| 22.5800 | 26.2020 | 52.1960 | H | 0 | 35.0790 | 27.6640 | 59.2660 | H | 0 | 47.6270 | 27.4440 | 58.0490 | H | 0 |
| 21.5210 | 26.1750 | 54.0670 | C | 0 | 36.2460 | 26.2420 | 60.3530 | C | 0 | 50.4890 | 27.1450 | 61.7070 | C | 0 |
| 20.8990 | 24.9390 | 53.8000 | C | 0 | 36.0780 | 25.7420 | 61.3070 | H | 0 | 51.5860 | 27.0810 | 61.0710 | O | 0 |
| 21.2680 | 24.3170 | 52.9980 | H | 0 | 36.6780 | 25.1450 | 59.3090 | C | 0 | 50.4880 | 27.0520 | 62.9970 | N | 0 |
| 19.8070 | 24.6190 | 54.6320 | C | 0 | 37.0160 | 25.6150 | 58.3860 | H | 0 | 49.5420 | 27.0840 | 63.3500 | H | 0 |
| 19.1550 | 23.8260 | 54.2980 | H | 0 | 37.5780 | 24.6180 | 59.6250 | H | 0 | 51.6240 | 26.8680 | 63.9300 | C | 0 |
| 19.3200 | 25.3550 | 55.6910 | C | 0 | 35.6420 | 24.0740 | 59.0390 | C | 0 | 52.1720 | 27.8100 | 63.9270 | H | 0 |
| 18.2700 | 24.9870 | 56.3930 | O | 0 | 35.3610 | 22.9150 | 59.8680 | C | 0 | 51.0800 | 26.6920 | 65.4400 | C | 0 |
| 17.5740 | 25.6370 | 56.5150 | H | 0 | 36.0740 | 22.7830 | 60.6670 | H | 0 | 50.4360 | 25.8350 | 65.6320 | H | 0 |
| 19.9690 | 26.5660 | 55.9360 | C | 0 | 34.3010 | 21.9970 | 59.5580 | C | 0 | 52.2120 | 26.7050 | 66.4720 | C | 0 |
| 19.4490 | 27.2120 | 56.6270 | H | 0 | 34.1860 | 21.1370 | 60.2020 | H | 0 | 52.5560 | 27.7230 | 66.6540 | H | 0 |
| 21.0260 | 27.0140 | 55.1010 | C | 0 | 33.6020 | 22.1370 | 58.3570 | C | 0 | 51.9100 | 26.1840 | 67.3810 | H | 0 |
| 21.4500 | 28.0040 | 55.1790 | H | 0 | 32.6300 | 21.2560 | 57.9740 | O | 0 | 53.0020 | 26.1300 | 65.9890 | H | 0 |
| 24.1580 | 24.6580 | 53.9530 | C | 0 | 32.4180 | 21.4310 | 57.0540 | H | 0 | 50.2600 | 27.8400 | 65.6700 | O | 0 |
| 24.2180 | 23.8510 | 52.9780 | O | 0 | 33.7700 | 23.3360 | 57.5590 | C | 0 | 49.5290 | 27.7240 | 65.0590 | H | 0 |
| 24.2770 | 24.2380 | 55.2250 | N | 0 | 33.0040 | 23.6070 | 56.8470 | H | 0 | 52.4410 | 25.6170 | 63.6010 | C | 0 |
| 24.5660 | 22.8050 | 55.5190 | C | 0 | 34.8200 | 24.2150 | 57.8780 | C | 0 | 53.6740 | 25.6680 | 63.7330 | O | 0 |
| 25.5790 | 22.5320 | 55.2240 | H | 0 | 34.8730 | 25.1610 | 57.3590 | H | 0 | 51.8150 | 24.4720 | 63.2640 | N | 0 |
| 23.8760 | 22.2540 | 54.8800 | H | 0 | 37.3750 | 27.2140 | 60.6800 | C | 0 | 50.8140 | 24.4440 | 63.1310 | H | 0 |
| 24.3620 | 22.6550 | 57.0390 | C | 0 | 37.5730 | 28.1900 | 59.9160 | O | 0 | 52.5110 | 23.2290 | 62.8680 | C | 0 |
| 25.3480 | 22.8020 | 57.4800 | H | 0 | 38.1980 | 26.9680 | 61.7210 | N | 0 | 53.5840 | 23.4220 | 62.8800 | H | 0 |
| 23.9810 | 21.6550 | 57.2490 | H | 0 | 38.0060 | 26.1020 | 62.2040 | H | 0 | 52.1680 | 22.0720 | 63.7900 | C | 0 |
| 23.4710 | 23.8530 | 57.5180 | C | 0 | 39.3540 | 27.7220 | 62.0960 | C | 0 | 52.5430 | 22.3090 | 64.7850 | H | 0 |
| 23.8030 | 24.1670 | 58.5080 | H | 0 | 39.4650 | 28.5820 | 61.4350 | H | 0 | 51.0820 | 22.0210 | 63.7200 | H | 0 |
| 22.4080 | 23.6180 | 57.4710 | H | 0 | 39.0890 | 28.1850 | 63.5500 | C | 0 | 52.8550 | 20.7190 | 63.4950 | C | 0 |
| 23.8370 | 24.9330 | 56.4670 | C | 0 | 38.7260 | 27.3840 | 64.1950 | H | 0 | 52.4660 | 19.9480 | 64.1590 | H | 0 |
| 22.9400 | 25.5340 | 56.3210 | H | 0 | 39.9530 | 28.7420 | 63.9090 | H | 0 | 52.5490 | 20.3890 | 62.5020 | H | 0 |
| 24.8280 | 25.9770 | 57.0970 | C | 0 | 38.3200 | 28.9470 | 63.4180 | H | 0 | 54.3770 | 20.6470 | 63.5300 | C | 0 |
| 24.5680 | 26.4470 | 58.2570 | O | 0 | 40.5710 | 26.7440 | 62.1260 | C | 0 | 54.9820 | 20.7560 | 62.4790 | O | 0 |
| 26.0010 | 26.2670 | 56.4690 | N | 0 | 40.4240 | 25.6500 | 62.6400 | O | 0 | 55.0180 | 20.4530 | 64.6820 | N | 0 |
| 26.1910 | 25.8100 | 55.5890 | H | 0 | 41.6200 | 27.1100 | 61.2950 | N | 0 | 56.0160 | 20.3210 | 64.6080 | H | 0 |
| 26.9710 | 27.2850 | 56.8980 | C | 0 | 41.5990 | 28.0520 | 60.9310 | H | 0 | 54.4680 | 20.3390 | 65.5220 | H | 0 |
| 27.6580 | 27.4060 | 56.0600 | H | 0 | 42.7120 | 26.3120 | 60.7760 | C | 0 | 52.1190 | 22.9300 | 61.4270 | C | 0 |
| 26.3500 | 28.7000 | 56.8960 | C | 0 | 42.7870 | 25.2980 | 61.1680 | H | 0 | 50.9310 | 22.9900 | 61.0280 | O | 0 |
| 25.8130 | 28.9090 | 57.8210 | H | 0 | 42.5900 | 26.1900 | 59.2510 | C | 0 | 53.0080 | 22.2830 | 60.6300 | N | 0 |
| 27.1410 | 29.4510 | 56.9010 | H | 0 | 42.5560 | 27.1280 | 58.6970 | H | 0 | 53.8590 | 21.9250 | 61.0390 | H | 0 |
| 25.5140 | 28.9530 | 55.6390 | C | 0 | 43.4540 | 25.6870 | 58.8170 | H | 0 | 52.7470 | 22.0520 | 59.1870 | C | 0 |
| 24.2860 | 29.1020 | 55.7530 | O | 0 | 41.3510 | 25.4150 | 58.7720 | C | 0 | 52.4670 | 23.0450 | 58.8360 | H | 0 |
| 26.0780 | 28.9690 | 54.5060 | N | 0 | 40.4300 | 25.9720 | 58.9470 | H | 0 | 53.9800 | 21.4840 | 58.4620 | C | 0 |
| 25.4510 | 29.1330 | 53.7310 | H | 0 | 41.5040 | 25.4320 | 57.2240 | C | 0 | 54.5500 | 20.8380 | 59.1290 | H | 0 |

|         |         |         |   |   |         |         |         |   |   |         |         |         |   |   |
|---------|---------|---------|---|---|---------|---------|---------|---|---|---------|---------|---------|---|---|
| 53.7730 | 20.9520 | 57.5330 | H | 0 | 39.9350 | 19.1000 | 61.2370 | H | 0 | 27.1390 | 27.4400 | 67.0400 | H | 0 |
| 54.8890 | 22.6930 | 57.9500 | C | 0 | 41.7970 | 22.8520 | 64.3810 | C | 0 | 27.1400 | 28.6350 | 65.2570 | C | 0 |
| 55.4200 | 22.3750 | 57.0520 | H | 0 | 41.9560 | 21.9560 | 65.2590 | O | 0 | 25.8590 | 29.0780 | 65.6220 | O | 0 |
| 54.3190 | 23.5240 | 57.5350 | H | 0 | 41.6090 | 24.1680 | 64.7320 | N | 0 | 25.6450 | 28.9070 | 66.5430 | H | 0 |
| 55.8630 | 23.2350 | 58.9590 | C | 0 | 41.4670 | 24.8080 | 63.9630 | H | 0 | 27.8750 | 29.0910 | 64.1210 | C | 0 |
| 55.3850 | 23.6260 | 59.8570 | H | 0 | 41.5250 | 24.8470 | 66.1080 | C | 0 | 27.5010 | 29.9150 | 63.5320 | H | 0 |
| 56.6460 | 22.4870 | 59.0850 | H | 0 | 42.2320 | 24.3990 | 66.8070 | H | 0 | 29.1250 | 28.4310 | 63.9030 | C | 0 |
| 56.5510 | 24.4490 | 58.2930 | C | 0 | 41.9590 | 26.2710 | 65.9240 | C | 0 | 29.6390 | 28.8000 | 63.0280 | H | 0 |
| 57.2520 | 24.0140 | 57.5800 | H | 0 | 43.0220 | 26.3390 | 65.6910 | H | 0 | 30.0440 | 25.2360 | 63.0950 | C | 0 |
| 55.8810 | 25.0430 | 57.6710 | H | 0 | 41.3020 | 26.7600 | 65.2050 | H | 0 | 30.3220 | 25.4810 | 61.9090 | O | 0 |
| 57.2460 | 25.2890 | 59.3150 | N | 0 | 41.9210 | 27.0020 | 67.2530 | C | 0 | 28.8120 | 24.8900 | 63.4690 | N | 0 |
| 56.6690 | 25.6420 | 60.0640 | H | 0 | 40.9010 | 27.1910 | 67.8860 | H | 0 | 28.6350 | 24.6170 | 64.4250 | H | 0 |
| 58.0010 | 24.7220 | 59.6760 | H | 0 | 42.2320 | 26.3960 | 68.1040 | H | 0 | 27.6460 | 24.8140 | 62.5600 | C | 0 |
| 57.7190 | 26.0280 | 58.8140 | H | 0 | 42.6270 | 28.3930 | 67.3000 | C | 0 | 27.9190 | 25.3990 | 61.6820 | H | 0 |
| 51.6130 | 20.9870 | 59.0170 | C | 0 | 43.5880 | 28.1580 | 66.8410 | H | 0 | 27.2640 | 23.3540 | 62.0670 | C | 0 |
| 51.4920 | 20.0540 | 59.7950 | O | 0 | 42.0770 | 29.1870 | 66.7950 | H | 0 | 26.8940 | 22.7730 | 62.9120 | H | 0 |
| 50.8320 | 21.1170 | 57.9540 | N | 0 | 42.8460 | 28.6950 | 68.7790 | C | 0 | 26.0880 | 23.3590 | 61.0400 | C | 0 |
| 50.0740 | 19.9730 | 57.4620 | C | 0 | 41.8980 | 28.7370 | 69.3140 | H | 0 | 25.2140 | 23.8490 | 61.4700 | H | 0 |
| 49.3820 | 19.5010 | 58.1600 | H | 0 | 43.4620 | 27.8790 | 69.1580 | H | 0 | 26.3270 | 24.0340 | 60.2180 | H | 0 |
| 50.6910 | 21.1330 | 57.1420 | H | 0 | 43.4250 | 30.0850 | 68.8680 | N | 0 | 25.9470 | 22.3290 | 60.7130 | H | 0 |
| 49.2470 | 20.5130 | 56.2710 | C | 0 | 44.4250 | 30.0330 | 68.7370 | H | 0 | 28.3530 | 22.7370 | 61.4730 | O | 0 |
| 48.2690 | 20.8220 | 56.6410 | H | 0 | 42.9780 | 30.7350 | 68.2360 | H | 0 | 28.1030 | 22.8250 | 60.5500 | H | 0 |
| 49.2230 | 19.8360 | 55.4180 | H | 0 | 43.2470 | 30.6050 | 69.7160 | H | 0 | 26.4650 | 25.4740 | 63.2600 | C | 0 |
| 49.9520 | 21.7170 | 55.8100 | C | 0 | 40.0470 | 24.7260 | 66.6710 | C | 0 | 26.0270 | 24.9460 | 64.3080 | O | 0 |
| 49.3020 | 22.4020 | 55.2650 | H | 0 | 39.9700 | 24.4900 | 67.8970 | O | 0 | 25.8220 | 26.4930 | 62.7010 | N | 0 |
| 50.7720 | 21.5030 | 55.1240 | H | 0 | 39.0010 | 25.0180 | 65.9090 | N | 0 | 26.0640 | 27.1960 | 61.4140 | C | 0 |
| 50.5840 | 22.2790 | 57.0640 | C | 0 | 39.1240 | 25.2100 | 64.9250 | H | 0 | 26.0670 | 26.4410 | 60.6280 | H | 0 |
| 51.5090 | 22.7560 | 56.7380 | H | 0 | 37.6380 | 24.8500 | 66.2830 | C | 0 | 27.0110 | 27.7350 | 61.4470 | H | 0 |
| 49.5070 | 23.2110 | 57.7200 | C | 0 | 37.5160 | 23.8990 | 66.8020 | H | 0 | 24.8650 | 28.1300 | 61.2190 | C | 0 |
| 49.5040 | 24.4080 | 57.3960 | O | 0 | 37.1010 | 26.0010 | 67.1980 | C | 0 | 24.0130 | 27.6570 | 60.7310 | H | 0 |
| 48.6320 | 22.6500 | 58.5450 | N | 0 | 36.0350 | 25.8660 | 67.3760 | H | 0 | 25.2070 | 29.0730 | 60.7940 | H | 0 |
| 48.7610 | 21.6690 | 58.7500 | H | 0 | 37.6570 | 25.8380 | 68.1220 | H | 0 | 24.3370 | 28.2600 | 62.6860 | C | 0 |
| 47.6620 | 23.1740 | 59.4410 | C | 0 | 37.1710 | 27.4570 | 66.7340 | C | 0 | 23.3140 | 28.6340 | 62.7250 | H | 0 |
| 48.0210 | 24.0670 | 59.9520 | H | 0 | 38.0810 | 28.4040 | 67.1640 | C | 0 | 24.9780 | 28.9730 | 63.2030 | H | 0 |
| 46.3960 | 23.5820 | 58.6940 | C | 0 | 38.7840 | 28.2250 | 67.9640 | H | 0 | 24.5700 | 26.9650 | 63.3640 | C | 0 |
| 45.5990 | 23.9890 | 59.3160 | H | 0 | 37.7350 | 29.6460 | 66.6470 | N | 0 | 24.7570 | 27.0910 | 64.4300 | H | 0 |
| 46.7950 | 24.3320 | 58.0100 | H | 0 | 38.2740 | 30.4920 | 66.7630 | H | 0 | 23.3780 | 26.0030 | 63.0710 | C | 0 |
| 45.7460 | 22.5320 | 57.8250 | C | 0 | 36.5630 | 29.5640 | 65.9030 | C | 0 | 23.3100 | 25.3540 | 61.9910 | O | 0 |
| 44.8530 | 21.5830 | 58.3200 | C | 0 | 35.8620 | 30.5380 | 65.2070 | C | 0 | 22.3400 | 26.1380 | 63.8870 | N | 0 |
| 44.5650 | 21.5790 | 59.3610 | H | 0 | 36.2270 | 31.5500 | 65.2950 | H | 0 | 22.4960 | 26.6750 | 64.7280 | H | 0 |
| 44.2970 | 20.5940 | 57.4750 | C | 0 | 34.8330 | 30.1570 | 64.3460 | C | 0 | 21.0150 | 25.5700 | 63.6050 | C | 0 |
| 43.6650 | 19.8760 | 57.9770 | H | 0 | 34.3610 | 30.8910 | 63.7100 | H | 0 | 21.1500 | 24.6450 | 63.0450 | H | 0 |
| 44.7200 | 20.4850 | 56.1410 | C | 0 | 34.4070 | 28.7930 | 64.2460 | C | 0 | 20.2580 | 25.2430 | 64.9130 | C | 0 |
| 44.3870 | 19.4740 | 55.2960 | O | 0 | 33.6440 | 28.5040 | 63.5380 | H | 0 | 20.4230 | 26.1000 | 65.5660 | H | 0 |
| 45.0400 | 19.5860 | 54.6020 | H | 0 | 35.0510 | 27.8050 | 65.0650 | C | 0 | 18.7800 | 25.0320 | 64.8640 | C | 0 |
| 45.6440 | 21.3910 | 55.6520 | C | 0 | 34.8300 | 26.7510 | 64.9920 | H | 0 | 18.1980 | 25.8800 | 64.5050 | H | 0 |
| 45.9510 | 21.3890 | 54.6170 | H | 0 | 36.1930 | 28.2290 | 65.8680 | C | 0 | 18.5410 | 24.2720 | 64.1210 | H | 0 |
| 46.1740 | 22.4280 | 56.4410 | C | 0 | 36.6850 | 24.8230 | 65.0420 | C | 0 | 18.3760 | 24.7670 | 65.8410 | H | 0 |
| 46.9280 | 23.0720 | 56.0140 | H | 0 | 37.1140 | 25.2140 | 63.9760 | O | 0 | 20.9650 | 24.0960 | 65.7920 | C | 0 |
| 47.2180 | 22.1070 | 60.4550 | C | 0 | 35.5410 | 24.1120 | 65.2000 | N | 0 | 20.7710 | 23.1440 | 65.2990 | H | 0 |
| 47.7020 | 20.9540 | 60.4320 | O | 0 | 35.1940 | 23.9570 | 66.1360 | H | 0 | 22.0320 | 24.3150 | 65.7590 | H | 0 |
| 46.4640 | 22.5470 | 61.4290 | N | 0 | 34.6080 | 23.9410 | 64.1230 | C | 0 | 20.6710 | 24.0850 | 66.8420 | H | 0 |
| 46.3510 | 23.5450 | 61.5330 | H | 0 | 34.7830 | 24.7540 | 63.4190 | H | 0 | 20.0810 | 26.4670 | 62.8060 | C | 0 |
| 45.5780 | 21.6910 | 62.3130 | C | 0 | 34.8820 | 22.6350 | 63.3350 | C | 0 | 19.6850 | 27.6000 | 63.2180 | O | 0 |
| 45.3560 | 20.7660 | 61.7820 | H | 0 | 34.3570 | 22.7410 | 62.3850 | H | 0 | 19.8540 | 25.9590 | 61.6120 | N | 0 |
| 46.3310 | 21.3320 | 63.6710 | C | 0 | 35.9690 | 22.5920 | 63.2650 | H | 0 | 20.2410 | 25.0400 | 61.4550 | H | 0 |
| 45.7540 | 20.4710 | 64.0110 | H | 0 | 34.3670 | 21.4210 | 64.1160 | C | 0 | 19.0220 | 26.6480 | 60.6500 | C | 0 |
| 47.3850 | 21.1180 | 63.4960 | H | 0 | 34.5480 | 21.4610 | 65.1900 | H | 0 | 18.7110 | 27.6070 | 61.0650 | H | 0 |
| 46.2610 | 22.1320 | 64.4080 | H | 0 | 33.2880 | 21.4590 | 63.9600 | H | 0 | 19.7930 | 26.9380 | 59.3360 | C | 0 |
| 44.2730 | 22.4640 | 62.6940 | C | 0 | 34.9570 | 20.1280 | 63.4840 | C | 0 | 19.8320 | 26.0710 | 58.6770 | H | 0 |
| 44.2150 | 23.6960 | 62.8570 | O | 0 | 34.4360 | 19.5940 | 62.4910 | O | 0 | 19.1440 | 27.5680 | 58.7280 | H | 0 |
| 43.1220 | 21.7760 | 62.6780 | N | 0 | 36.1020 | 19.6840 | 64.0010 | N | 0 | 21.1700 | 27.7270 | 59.3890 | C | 0 |
| 43.0550 | 20.8110 | 62.3860 | H | 0 | 36.6700 | 18.9340 | 63.6340 | H | 0 | 21.2830 | 28.4510 | 60.1960 | H | 0 |
| 41.7590 | 22.3980 | 62.8980 | C | 0 | 36.6030 | 20.3340 | 64.5890 | H | 0 | 21.9940 | 27.0270 | 59.5270 | H | 0 |
| 41.7070 | 23.2050 | 62.1670 | H | 0 | 33.2250 | 24.3070 | 64.6040 | C | 0 | 21.6460 | 28.5240 | 58.1440 | C | 0 |
| 40.6880 | 21.3540 | 62.5690 | C | 0 | 32.8080 | 23.9100 | 65.6960 | O | 0 | 20.9500 | 29.2240 | 57.3980 | O | 0 |
| 40.9860 | 20.3810 | 62.9600 | H | 0 | 32.4420 | 25.0320 | 63.7770 | N | 0 | 22.9640 | 28.6590 | 58.0570 | N | 0 |
| 39.2950 | 21.6750 | 63.1860 | C | 0 | 32.8010 | 25.3310 | 62.8810 | H | 0 | 23.2470 | 29.0280 | 57.1600 | H | 0 |
| 38.6620 | 20.7870 | 63.2070 | H | 0 | 31.0700 | 25.5100 | 64.1450 | C | 0 | 23.5470 | 27.9150 | 58.4130 | H | 0 |
| 39.4890 | 21.8560 | 64.2430 | H | 0 | 30.7280 | 25.0680 | 65.0810 | H | 0 | 17.6090 | 25.9690 | 60.4070 | C | 0 |
| 38.7830 | 22.5170 | 62.7210 | H | 0 | 31.0940 | 27.0360 | 64.4970 | C | 0 | 17.4380 | 24.7530 | 60.6990 | O | 0 |
| 40.4910 | 21.1790 | 61.0590 | C | 0 | 31.6960 | 27.1680 | 65.3960 | H | 0 | 16.7070 | 26.7720 | 59.8610 | N | 0 |
| 40.0050 | 22.0910 | 60.7120 | H | 0 | 31.4200 | 27.6030 | 63.6250 | H | 0 | 16.8260 | 27.7750 | 59.8340 | H | 0 |
| 41.4080 | 21.0050 | 60.4970 | H | 0 | 29.7330 | 27.5700 | 64.8070 | C | 0 | 15.3390 | 26.3400 | 59.4720 | C | 0 |
| 39.6040 | 19.9700 | 60.6690 | C | 0 | 29.0140 | 27.1870 | 65.9700 | C | 0 | 14.9970 | 25.5570 | 60.1500 | H | 0 |
| 38.5510 | 20.1830 | 60.8520 | H | 0 | 29.5650 | 26.5660 | 66.6610 | H | 0 | 14.4930 | 27.6660 | 59.6680 | C | 0 |
| 39.6460 | 19.8100 | 59.5920 | H | 0 | 27.6910 | 27.6510 | 66.1360 | C | 0 | 14.5400 | 27.8090 | 60.7480 | H | 0 |



|         |         |         |   |   |         |         |         |   |   |         |         |         |   |   |
|---------|---------|---------|---|---|---------|---------|---------|---|---|---------|---------|---------|---|---|
| 14.9300 | 28.5020 | 59.1230 | H | 0 | 14.0600 | 30.9180 | 51.5950 | H | 0 | 25.6680 | 33.1590 | 46.3900 | H | 0 |
| 13.0560 | 27.5880 | 59.1490 | C | 0 | 13.2110 | 32.7890 | 51.0900 | C | 0 | 25.8540 | 33.1520 | 48.1210 | H | 0 |
| 12.6900 | 26.7200 | 58.3970 | O | 0 | 12.3380 | 33.1520 | 50.5480 | H | 0 | 24.8670 | 30.7470 | 45.9990 | C | 0 |
| 12.2730 | 28.4510 | 59.7120 | N | 0 | 13.0700 | 33.0400 | 52.1410 | H | 0 | 24.5260 | 31.4140 | 45.2070 | H | 0 |
| 11.3670 | 28.5980 | 59.2930 | H | 0 | 14.1000 | 33.2130 | 50.6240 | H | 0 | 25.9150 | 30.6040 | 45.7380 | H | 0 |
| 12.4820 | 29.0210 | 60.5200 | H | 0 | 11.8090 | 30.8430 | 51.6240 | C | 0 | 24.2290 | 29.8730 | 45.8680 | H | 0 |
| 15.2630 | 25.7990 | 58.0630 | C | 0 | 11.7450 | 29.7550 | 51.5950 | H | 0 | 25.0080 | 31.3250 | 49.6980 | C | 0 |
| 15.9410 | 26.3710 | 57.1890 | O | 0 | 11.7310 | 31.1030 | 52.6800 | H | 0 | 23.9860 | 31.9250 | 50.0510 | O | 0 |
| 14.4860 | 24.7720 | 57.7670 | N | 0 | 10.9480 | 31.2030 | 51.0590 | H | 0 | 26.1620 | 31.5520 | 50.2910 | N | 0 |
| 14.0000 | 24.4150 | 58.5770 | H | 0 | 14.7380 | 31.2350 | 48.9130 | C | 0 | 26.9840 | 31.0320 | 50.0190 | H | 0 |
| 14.5180 | 24.1340 | 56.4470 | C | 0 | 14.6560 | 32.2700 | 48.1680 | O | 0 | 26.2690 | 32.3550 | 51.4590 | C | 0 |
| 15.5000 | 24.2930 | 56.0030 | H | 0 | 15.9100 | 30.6170 | 49.0330 | N | 0 | 25.5320 | 33.1580 | 51.4480 | H | 0 |
| 14.2100 | 22.6230 | 56.5840 | C | 0 | 15.8440 | 29.8640 | 49.7020 | H | 0 | 25.7740 | 31.5090 | 52.6010 | C | 0 |
| 13.3230 | 22.4720 | 57.2000 | H | 0 | 17.1280 | 31.0450 | 48.3750 | C | 0 | 24.8340 | 31.0140 | 52.3580 | H | 0 |
| 13.9480 | 22.2160 | 55.6070 | H | 0 | 17.1580 | 32.1180 | 48.5630 | H | 0 | 26.3960 | 30.6140 | 52.6100 | H | 0 |
| 15.1860 | 21.8000 | 57.0550 | O | 0 | 18.2870 | 30.2420 | 49.0970 | C | 0 | 25.8820 | 32.1660 | 53.9650 | C | 0 |
| 15.7770 | 21.6750 | 56.3090 | H | 0 | 18.2850 | 29.1580 | 48.9750 | H | 0 | 26.9780 | 32.4660 | 54.4820 | O | 0 |
| 13.6970 | 24.7480 | 55.3870 | C | 0 | 19.2490 | 30.6050 | 48.7350 | H | 0 | 24.7300 | 32.6110 | 54.4850 | N | 0 |
| 13.7720 | 24.3940 | 54.2130 | O | 0 | 18.2130 | 30.4920 | 50.1550 | H | 0 | 24.8500 | 33.1560 | 55.3270 | H | 0 |
| 12.8910 | 25.7280 | 55.7220 | N | 0 | 16.9590 | 30.9370 | 46.8430 | C | 0 | 23.9280 | 32.7150 | 53.8800 | H | 0 |
| 12.8850 | 26.0420 | 56.6820 | H | 0 | 16.7210 | 29.8560 | 46.3070 | O | 0 | 27.6720 | 32.8360 | 51.6310 | C | 0 |
| 12.1590 | 26.6190 | 54.7350 | C | 0 | 17.2680 | 31.9800 | 46.1220 | N | 0 | 28.5690 | 31.9750 | 51.3600 | O | 0 |
| 11.5400 | 25.9000 | 54.1970 | H | 0 | 17.4450 | 32.8840 | 46.5370 | H | 0 | 27.9970 | 34.0370 | 52.0880 | N | 0 |
| 11.2920 | 27.5980 | 55.5630 | C | 0 | 17.5100 | 32.0680 | 44.5980 | C | 0 | 27.1970 | 34.6170 | 52.2950 | H | 0 |
| 10.6240 | 27.0500 | 56.2260 | H | 0 | 16.5220 | 32.0480 | 44.1400 | H | 0 | 29.3360 | 34.6230 | 51.9830 | C | 0 |
| 11.9520 | 28.0270 | 56.3170 | H | 0 | 18.2030 | 33.4460 | 44.3780 | C | 0 | 29.9980 | 33.9270 | 51.4690 | H | 0 |
| 10.4540 | 28.6450 | 54.8110 | C | 0 | 18.2100 | 33.5360 | 43.2920 | H | 0 | 29.3920 | 35.8200 | 51.0060 | C | 0 |
| 10.1320 | 29.3650 | 55.5640 | H | 0 | 17.6810 | 34.2710 | 44.8640 | H | 0 | 28.7770 | 36.6370 | 51.3820 | H | 0 |
| 11.0680 | 29.2160 | 54.1150 | H | 0 | 19.8850 | 33.4500 | 44.9010 | S | 0 | 30.4010 | 36.2320 | 50.9890 | H | 0 |
| 9.2540  | 28.0660 | 54.1000 | C | 0 | 18.3770 | 30.9150 | 43.9930 | C | 0 | 28.8950 | 35.4090 | 49.5660 | C | 0 |
| 8.1800  | 28.6460 | 54.0220 | O | 0 | 18.1770 | 30.6670 | 42.8150 | O | 0 | 29.6260 | 34.6950 | 49.1850 | H | 0 |
| 9.4090  | 26.9900 | 53.4100 | N | 0 | 19.2950 | 30.3580 | 44.7950 | N | 0 | 27.9620 | 34.8480 | 49.6140 | H | 0 |
| 8.5170  | 26.7490 | 53.0040 | H | 0 | 19.3190 | 30.7470 | 45.7270 | H | 0 | 28.7480 | 36.6770 | 48.7630 | C | 0 |
| 10.2780 | 26.5260 | 53.1890 | H | 0 | 20.5070 | 29.7600 | 44.3630 | C | 0 | 28.2120 | 37.4370 | 49.3330 | H | 0 |
| 13.1420 | 27.4060 | 53.8030 | C | 0 | 20.3390 | 29.5140 | 43.3140 | H | 0 | 29.7100 | 37.1720 | 48.6270 | H | 0 |
| 12.8770 | 27.6990 | 52.6680 | O | 0 | 21.5610 | 30.8970 | 44.4340 | C | 0 | 28.1070 | 36.3240 | 47.4380 | N | 0 |
| 14.3640 | 27.7700 | 54.3270 | N | 0 | 21.6940 | 31.1490 | 45.4860 | H | 0 | 28.7570 | 36.2510 | 46.6690 | H | 0 |
| 14.5390 | 27.5090 | 55.2870 | H | 0 | 22.4530 | 30.4270 | 44.0200 | H | 0 | 26.8360 | 36.1310 | 47.0710 | C | 0 |
| 15.2010 | 28.7230 | 53.5650 | C | 0 | 21.1270 | 32.4400 | 43.5340 | S | 0 | 25.8640 | 36.0750 | 47.8860 | N | 0 |
| 14.5990 | 29.5900 | 53.2940 | H | 0 | 20.8100 | 28.5580 | 45.3020 | C | 0 | 26.0970 | 36.2390 | 48.8550 | H | 0 |
| 16.3530 | 29.0880 | 54.6010 | C | 0 | 21.9610 | 28.0500 | 45.4470 | O | 0 | 24.9080 | 35.8500 | 47.6530 | H | 0 |
| 16.8920 | 28.2630 | 55.0660 | H | 0 | 19.7890 | 28.1320 | 45.9940 | N | 0 | 26.5640 | 35.9220 | 45.8660 | N | 0 |
| 17.0990 | 29.6280 | 54.0180 | H | 0 | 18.8960 | 28.5630 | 45.7990 | H | 0 | 27.3410 | 35.8750 | 45.2220 | H | 0 |
| 15.9750 | 29.6900 | 55.4280 | H | 0 | 19.5100 | 27.1080 | 47.0750 | C | 0 | 25.6270 | 35.6600 | 45.5950 | H | 0 |
| 15.7730 | 28.1880 | 52.2180 | C | 0 | 18.4610 | 27.1270 | 47.3710 | H | 0 | 30.0520 | 34.7070 | 53.3300 | C | 0 |
| 16.0280 | 29.0290 | 51.4020 | O | 0 | 19.8410 | 25.7020 | 46.4440 | C | 0 | 31.1650 | 35.1760 | 53.3940 | O | 0 |
| 16.0100 | 26.9260 | 52.0610 | N | 0 | 20.8860 | 25.7300 | 46.1370 | H | 0 | 29.4080 | 34.1640 | 54.3640 | N | 0 |
| 15.7400 | 26.3950 | 52.8770 | H | 0 | 19.6480 | 24.9290 | 47.1880 | H | 0 | 28.5680 | 33.6620 | 54.1130 | H | 0 |
| 16.4830 | 26.2850 | 50.8190 | C | 0 | 18.9770 | 25.2970 | 45.2370 | C | 0 | 29.9730 | 33.9380 | 55.6640 | C | 0 |
| 17.4990 | 26.5890 | 50.5680 | H | 0 | 17.7940 | 25.7140 | 45.1350 | O | 0 | 29.2830 | 33.4270 | 56.3350 | H | 0 |
| 16.6100 | 24.7810 | 51.0130 | C | 0 | 19.4490 | 24.5580 | 44.3550 | O | 0 | 30.7690 | 33.1990 | 55.5720 | H | 0 |
| 15.6190 | 24.3640 | 51.1870 | H | 0 | 20.2490 | 27.2700 | 48.3590 | C | 0 | 30.4820 | 35.0310 | 56.5290 | C | 0 |
| 17.1660 | 24.1800 | 49.7630 | C | 0 | 19.6360 | 27.1370 | 49.4120 | O | 0 | 29.7320 | 35.7310 | 57.1930 | O | 0 |
| 16.5370 | 24.3330 | 48.8860 | H | 0 | 21.5510 | 27.6140 | 48.2580 | N | 0 | 31.8130 | 35.1570 | 56.6220 | N | 0 |
| 18.1060 | 24.6510 | 49.4770 | H | 0 | 21.8520 | 27.7990 | 47.3120 | H | 0 | 32.4120 | 34.7720 | 55.9060 | H | 0 |
| 17.3070 | 23.1240 | 49.9940 | H | 0 | 22.5340 | 27.4560 | 49.3610 | C | 0 | 32.4740 | 35.4590 | 57.8960 | C | 0 |
| 17.6730 | 24.4880 | 52.1330 | C | 0 | 22.0220 | 27.4430 | 50.3230 | H | 0 | 31.6840 | 35.7010 | 58.6060 | H | 0 |
| 17.5470 | 24.8290 | 53.1610 | H | 0 | 23.1800 | 26.0420 | 49.4140 | C | 0 | 33.1830 | 34.2350 | 58.3960 | C | 0 |
| 17.8760 | 23.4170 | 52.1290 | H | 0 | 23.9180 | 26.0260 | 50.2160 | H | 0 | 33.1910 | 34.4310 | 59.4680 | H | 0 |
| 18.6010 | 24.9330 | 51.7760 | H | 0 | 22.1810 | 24.8580 | 49.6210 | C | 0 | 32.4550 | 33.4240 | 58.3650 | H | 0 |
| 15.5330 | 26.6250 | 49.5980 | C | 0 | 21.6100 | 25.0190 | 50.5360 | H | 0 | 34.5910 | 34.0130 | 57.9720 | C | 0 |
| 16.0360 | 27.0340 | 48.5650 | O | 0 | 21.4820 | 24.8020 | 48.7870 | H | 0 | 35.1760 | 34.9250 | 58.0860 | H | 0 |
| 14.2470 | 26.5260 | 49.8800 | N | 0 | 22.7930 | 23.9610 | 49.5230 | H | 0 | 35.2470 | 32.9580 | 58.8140 | C | 0 |
| 13.9520 | 26.3420 | 50.8290 | H | 0 | 23.8640 | 25.7510 | 48.0980 | C | 0 | 36.2000 | 32.7010 | 58.3520 | H | 0 |
| 13.1870 | 26.8370 | 48.8850 | C | 0 | 24.2740 | 24.7420 | 48.1430 | H | 0 | 35.4570 | 33.3560 | 59.8060 | H | 0 |
| 13.3250 | 26.2500 | 47.9770 | H | 0 | 23.1510 | 25.7560 | 47.2740 | H | 0 | 34.6390 | 32.0620 | 58.9380 | H | 0 |
| 11.9040 | 26.3170 | 49.5480 | C | 0 | 24.5760 | 26.5240 | 47.8090 | H | 0 | 34.6040 | 33.4010 | 56.5350 | C | 0 |
| 12.0600 | 25.4070 | 50.1280 | H | 0 | 23.7540 | 28.4660 | 49.4600 | C | 0 | 34.0950 | 34.0660 | 55.8360 | H | 0 |
| 11.5040 | 27.0690 | 50.2290 | H | 0 | 24.5920 | 28.2660 | 50.3070 | O | 0 | 35.6320 | 33.3740 | 56.1750 | H | 0 |
| 11.1420 | 26.3210 | 48.7690 | H | 0 | 23.8920 | 29.3970 | 48.5330 | N | 0 | 34.1660 | 32.4030 | 56.5610 | H | 0 |
| 13.1270 | 28.4080 | 48.7050 | C | 0 | 23.0000 | 29.5110 | 48.0730 | H | 0 | 33.4300 | 36.6770 | 57.9000 | C | 0 |
| 12.7510 | 28.8980 | 47.6140 | O | 0 | 24.9940 | 30.4490 | 48.4880 | C | 0 | 34.1640 | 36.8730 | 56.9550 | O | 0 |
| 13.5390 | 29.2270 | 49.6910 | N | 0 | 25.9740 | 29.9810 | 48.3950 | H | 0 | 33.4730 | 37.4130 | 58.9980 | N | 0 |
| 13.9050 | 28.7970 | 50.5280 | H | 0 | 24.7550 | 31.4530 | 47.2730 | C | 0 | 32.7870 | 37.2140 | 59.7110 | H | 0 |
| 13.4360 | 30.6630 | 49.5710 | C | 0 | 23.7320 | 31.8230 | 47.3470 | H | 0 | 34.4650 | 38.5710 | 59.1900 | C | 0 |
| 12.6000 | 30.9490 | 48.9340 | H | 0 | 25.8470 | 32.5050 | 47.2440 | C | 0 | 35.4110 | 38.4120 | 58.6730 | H | 0 |
| 13.2150 | 31.2620 | 50.9980 | C | 0 | 26.8470 | 32.0740 | 47.2650 | H | 0 | 33.8930 | 39.8640 | 58.5720 | C | 0 |

|         |         |         |   |   |         |         |         |   |   |         |         |         |   |   |
|---------|---------|---------|---|---|---------|---------|---------|---|---|---------|---------|---------|---|---|
| 32.9570 | 40.0040 | 59.1120 | H | 0 | 34.5280 | 38.0400 | 66.2770 | C | 0 | 21.5800 | 31.1040 | 58.7790 | H | 0 |
| 34.5870 | 40.6460 | 58.8820 | H | 0 | 34.5820 | 38.9610 | 65.4550 | O | 0 | 22.8870 | 31.3020 | 60.5040 | C | 0 |
| 33.7770 | 39.7590 | 57.4940 | H | 0 | 34.4210 | 36.7500 | 65.8900 | N | 0 | 23.1360 | 32.1050 | 61.1970 | H | 0 |
| 34.9230 | 38.6700 | 60.5770 | C | 0 | 34.1610 | 36.0260 | 66.5440 | H | 0 | 22.2310 | 30.6420 | 61.0710 | H | 0 |
| 34.0650 | 38.6780 | 61.5140 | O | 0 | 34.1660 | 36.3750 | 64.4300 | C | 0 | 23.8070 | 30.7970 | 60.2100 | H | 0 |
| 36.1480 | 39.0020 | 60.8190 | N | 0 | 34.6910 | 37.0400 | 63.7440 | H | 0 | 21.1140 | 32.7910 | 59.9090 | O | 0 |
| 36.8000 | 39.2060 | 60.0750 | H | 0 | 34.5300 | 34.9540 | 64.1210 | C | 0 | 20.3590 | 32.2690 | 60.1890 | H | 0 |
| 36.7870 | 39.1740 | 62.1560 | C | 0 | 34.1780 | 34.3120 | 64.9290 | H | 0 | 22.0420 | 32.9790 | 57.0420 | C | 0 |
| 36.2690 | 38.5540 | 62.8880 | H | 0 | 33.8570 | 34.4610 | 62.8090 | C | 0 | 21.4190 | 34.0410 | 57.0750 | O | 0 |
| 38.3100 | 38.8450 | 62.0210 | C | 0 | 32.7730 | 34.3460 | 62.8180 | H | 0 | 21.9210 | 32.0600 | 56.1030 | N | 0 |
| 38.5770 | 37.8280 | 61.7350 | H | 0 | 34.0230 | 35.0820 | 61.9280 | H | 0 | 22.5100 | 31.2390 | 56.1080 | H | 0 |
| 38.6540 | 39.5270 | 61.2440 | H | 0 | 34.1850 | 33.4380 | 62.6200 | H | 0 | 20.8930 | 32.0790 | 55.0960 | C | 0 |
| 39.1730 | 39.0890 | 63.2780 | C | 0 | 36.0050 | 34.6170 | 63.8680 | C | 0 | 20.9840 | 32.9640 | 54.4650 | H | 0 |
| 39.1990 | 38.1850 | 64.2940 | C | 0 | 36.5850 | 34.9550 | 64.7270 | H | 0 | 21.0130 | 30.7970 | 54.2150 | C | 0 |
| 38.4770 | 37.3820 | 64.2890 | H | 0 | 36.2640 | 33.5610 | 63.9430 | H | 0 | 22.0730 | 30.6060 | 54.0470 | H | 0 |
| 39.9440 | 38.3900 | 65.4910 | C | 0 | 36.6740 | 35.2800 | 62.6240 | C | 0 | 20.6530 | 29.9790 | 54.8380 | H | 0 |
| 39.8050 | 37.6880 | 66.3000 | H | 0 | 36.4680 | 36.3480 | 62.5570 | H | 0 | 20.1920 | 30.8140 | 52.9510 | C | 0 |
| 40.6890 | 39.5890 | 65.6480 | C | 0 | 37.7490 | 35.1250 | 62.5390 | H | 0 | 19.1940 | 31.2340 | 53.0800 | H | 0 |
| 41.2210 | 39.8670 | 66.8480 | O | 0 | 36.2030 | 34.8700 | 61.7300 | H | 0 | 20.8460 | 31.6400 | 51.8100 | C | 0 |
| 41.5280 | 40.7720 | 66.7490 | H | 0 | 32.6000 | 36.6920 | 64.2780 | C | 0 | 20.3780 | 31.4500 | 50.8450 | H | 0 |
| 40.6680 | 40.4940 | 64.5930 | C | 0 | 31.7850 | 36.0400 | 65.0520 | O | 0 | 20.7300 | 32.7120 | 51.9730 | H | 0 |
| 41.0730 | 41.4900 | 64.6940 | H | 0 | 32.1790 | 37.5310 | 63.3470 | N | 0 | 21.9250 | 31.4860 | 51.7860 | H | 0 |
| 39.9560 | 40.2480 | 63.4050 | C | 0 | 32.7680 | 38.0370 | 62.7010 | H | 0 | 20.0570 | 29.4040 | 52.4950 | C | 0 |
| 39.8330 | 41.0200 | 62.6600 | H | 0 | 30.7860 | 37.6000 | 62.9520 | C | 0 | 19.3050 | 29.2670 | 51.7180 | H | 0 |
| 36.6800 | 40.6250 | 62.7670 | C | 0 | 30.1550 | 37.3710 | 63.8100 | H | 0 | 20.9900 | 29.0540 | 52.0530 | H | 0 |
| 37.1290 | 41.5790 | 62.1180 | O | 0 | 30.4940 | 39.1200 | 62.6150 | C | 0 | 19.6630 | 28.7380 | 53.2620 | H | 0 |
| 36.4320 | 40.7010 | 64.1310 | N | 0 | 31.0120 | 39.3530 | 61.6840 | H | 0 | 19.4450 | 32.0790 | 55.6710 | C | 0 |
| 36.2870 | 39.8120 | 64.5880 | H | 0 | 29.4670 | 39.1430 | 62.2520 | H | 0 | 18.6520 | 32.8190 | 55.0870 | O | 0 |
| 36.7930 | 41.7970 | 65.0160 | C | 0 | 30.7140 | 40.0730 | 63.7970 | C | 0 | 19.0850 | 31.4360 | 56.7970 | N | 0 |
| 37.4990 | 42.5530 | 64.6720 | H | 0 | 29.8650 | 39.8850 | 64.9400 | C | 0 | 19.7480 | 30.8280 | 57.2560 | H | 0 |
| 35.4720 | 42.5050 | 65.2750 | C | 0 | 29.0650 | 39.1600 | 64.9710 | H | 0 | 17.7300 | 31.7300 | 57.3580 | C | 0 |
| 34.9340 | 41.6770 | 65.7370 | H | 0 | 30.0360 | 40.6930 | 66.0410 | C | 0 | 17.0120 | 31.7930 | 56.5410 | H | 0 |
| 35.5150 | 43.2130 | 66.1030 | H | 0 | 29.3500 | 40.5610 | 66.8650 | H | 0 | 17.2950 | 30.6660 | 58.3690 | C | 0 |
| 35.0420 | 42.7720 | 64.3100 | H | 0 | 31.0610 | 41.6700 | 66.0410 | C | 0 | 16.2350 | 30.8910 | 58.4860 | H | 0 |
| 37.4650 | 41.3330 | 66.3230 | C | 0 | 31.1440 | 42.3820 | 66.8490 | H | 0 | 17.4070 | 29.7490 | 57.7900 | H | 0 |
| 37.5540 | 40.1240 | 66.4590 | O | 0 | 31.8920 | 41.8300 | 64.9170 | C | 0 | 17.9860 | 30.4580 | 59.6400 | C | 0 |
| 37.8130 | 42.1520 | 67.3240 | N | 0 | 32.7410 | 42.4970 | 64.9310 | H | 0 | 19.0130 | 31.1060 | 59.9640 | O | 0 |
| 37.6480 | 43.1310 | 67.1370 | H | 0 | 31.7400 | 40.9980 | 63.8190 | C | 0 | 17.4920 | 29.5020 | 60.3410 | O | 0 |
| 38.5840 | 41.6720 | 68.5030 | C | 0 | 32.4680 | 41.0210 | 63.0220 | H | 0 | 17.4970 | 33.1490 | 57.9900 | C | 0 |
| 39.4430 | 41.1740 | 68.0550 | H | 0 | 30.4910 | 36.7300 | 61.7330 | C | 0 | 16.4070 | 33.5660 | 58.3440 | O | 0 |
| 39.1000 | 42.8650 | 69.2810 | C | 0 | 31.2540 | 36.6180 | 60.8300 | O | 0 | 18.6020 | 33.9280 | 58.2980 | N | 0 |
| 39.5430 | 43.5400 | 68.5490 | H | 0 | 29.2780 | 36.1880 | 61.6180 | N | 0 | 19.5070 | 33.4880 | 58.2120 | H | 0 |
| 38.1710 | 43.3290 | 69.6110 | H | 0 | 28.6080 | 36.5050 | 62.3040 | H | 0 | 18.5000 | 35.3530 | 58.6040 | C | 0 |
| 40.0290 | 42.4870 | 70.4290 | C | 0 | 28.7580 | 35.4820 | 60.4000 | C | 0 | 18.8800 | 35.9080 | 57.7470 | H | 0 |
| 40.6450 | 41.4530 | 70.3570 | O | 0 | 29.1580 | 36.0670 | 59.5710 | H | 0 | 17.4350 | 35.5360 | 58.7490 | H | 0 |
| 40.1110 | 43.2730 | 71.4930 | N | 0 | 29.3290 | 34.0270 | 60.2900 | C | 0 | 19.1160 | 35.9640 | 59.8910 | C | 0 |
| 40.7380 | 43.0500 | 72.2530 | H | 0 | 29.1200 | 33.5490 | 59.3330 | H | 0 | 18.8060 | 37.1330 | 60.2570 | O | 0 |
| 39.5780 | 44.1200 | 71.6220 | H | 0 | 30.4000 | 34.2130 | 60.3720 | H | 0 | 19.8500 | 35.1670 | 60.6730 | N | 0 |
| 37.8360 | 40.6070 | 69.3500 | C | 0 | 28.9220 | 33.0500 | 61.3540 | C | 0 | 20.1410 | 34.2920 | 60.2610 | H | 0 |
| 36.8530 | 40.9050 | 69.9440 | O | 0 | 29.6660 | 32.2820 | 61.5630 | H | 0 | 20.4880 | 35.5600 | 61.9750 | C | 0 |
| 38.2320 | 39.3530 | 69.2920 | N | 0 | 28.8940 | 33.6470 | 62.2660 | H | 0 | 19.8470 | 36.2810 | 62.4830 | H | 0 |
| 38.9750 | 39.1170 | 68.6500 | H | 0 | 27.2550 | 32.4240 | 61.0700 | S | 0 | 20.7390 | 34.2730 | 62.7950 | C | 0 |
| 37.6700 | 38.2540 | 70.0830 | C | 0 | 27.5030 | 31.4300 | 59.5470 | C | 0 | 21.6460 | 33.7710 | 62.4600 | H | 0 |
| 38.3430 | 37.4150 | 70.2620 | H | 0 | 27.6520 | 32.1020 | 58.7030 | H | 0 | 21.0290 | 34.4710 | 63.8270 | H | 0 |
| 37.4940 | 38.5340 | 71.1210 | H | 0 | 28.2320 | 30.6270 | 59.6600 | H | 0 | 19.6750 | 33.1810 | 62.7860 | C | 0 |
| 36.3890 | 37.6450 | 69.4060 | C | 0 | 26.5280 | 30.9670 | 59.3950 | H | 0 | 18.8580 | 33.3990 | 63.4740 | H | 0 |
| 35.8590 | 36.6650 | 69.9370 | O | 0 | 27.2570 | 35.5160 | 60.1760 | C | 0 | 19.1070 | 33.0950 | 61.8590 | H | 0 |
| 35.9240 | 38.1800 | 68.2850 | N | 0 | 26.5050 | 35.5570 | 61.1550 | O | 0 | 20.1560 | 31.8210 | 63.2580 | C | 0 |
| 36.5500 | 38.7970 | 67.7870 | H | 0 | 26.7470 | 35.6270 | 58.9430 | N | 0 | 20.5080 | 31.5940 | 64.4220 | O | 0 |
| 34.5850 | 38.1920 | 67.8090 | C | 0 | 27.4030 | 35.5580 | 58.1780 | H | 0 | 19.8720 | 30.7070 | 62.5460 | N | 0 |
| 34.1440 | 37.2910 | 68.2360 | H | 0 | 25.2640 | 35.6100 | 58.7020 | C | 0 | 20.1840 | 29.7880 | 62.8280 | H | 0 |
| 33.7620 | 39.4250 | 68.1880 | C | 0 | 24.7240 | 35.8950 | 59.6040 | H | 0 | 19.5980 | 30.7930 | 61.5780 | H | 0 |
| 34.2510 | 40.3410 | 67.8550 | H | 0 | 24.9610 | 36.7270 | 57.7540 | C | 0 | 21.8780 | 36.2160 | 61.6850 | C | 0 |
| 32.7810 | 39.3560 | 67.7200 | H | 0 | 23.8980 | 36.5670 | 57.5760 | H | 0 | 22.6070 | 35.7300 | 60.7870 | O | 0 |
| 33.4880 | 39.3920 | 69.7170 | C | 0 | 25.1310 | 38.1190 | 58.4210 | C | 0 | 22.3590 | 37.1180 | 62.5860 | N | 0 |
| 33.0200 | 38.4430 | 69.9790 | H | 0 | 26.1510 | 38.2030 | 58.7960 | H | 0 | 21.6710 | 37.4580 | 63.2430 | H | 0 |
| 34.4380 | 39.4370 | 70.2500 | H | 0 | 24.9460 | 39.0330 | 57.8570 | H | 0 | 23.7400 | 37.5650 | 62.6910 | C | 0 |
| 32.5120 | 40.4990 | 70.1300 | C | 0 | 24.3490 | 38.1390 | 59.1810 | H | 0 | 24.4480 | 37.2270 | 61.9350 | H | 0 |
| 32.9260 | 41.4510 | 69.7980 | H | 0 | 25.7400 | 36.7970 | 56.5840 | O | 0 | 23.7870 | 39.0950 | 62.4090 | C | 0 |
| 31.4730 | 40.3580 | 69.8350 | H | 0 | 25.6450 | 36.0500 | 55.9880 | H | 0 | 23.7100 | 39.2330 | 61.3300 | H | 0 |
| 32.4910 | 40.4350 | 71.6460 | C | 0 | 24.6930 | 34.2430 | 58.1770 | C | 0 | 22.5940 | 39.8860 | 63.0200 | C | 0 |
| 32.2190 | 39.4360 | 71.9840 | H | 0 | 25.2340 | 33.6940 | 57.2110 | O | 0 | 21.7330 | 39.7870 | 62.3580 | H | 0 |
| 33.5400 | 40.6670 | 71.8310 | H | 0 | 23.6830 | 33.7030 | 58.8350 | N | 0 | 22.3450 | 39.4340 | 63.9800 | H | 0 |
| 31.5800 | 41.4080 | 72.4340 | N | 0 | 23.3710 | 34.0420 | 59.7340 | H | 0 | 22.8250 | 40.9320 | 63.2200 | H | 0 |
| 31.5920 | 41.2120 | 73.4250 | H | 0 | 22.9490 | 32.5750 | 58.2770 | C | 0 | 25.2330 | 39.6210 | 62.8700 | C | 0 |
| 31.8920 | 42.3680 | 72.4020 | H | 0 | 23.7290 | 31.8850 | 57.9540 | H | 0 | 25.1610 | 40.6890 | 63.0740 | H | 0 |
| 30.6410 | 41.3620 | 72.0650 | H | 0 | 22.0790 | 31.9110 | 59.3150 | C | 0 | 25.4220 | 39.2080 | 63.8600 | H | 0 |

|         |         |         |   |   |         |         |         |   |   |         |         |         |   |   |
|---------|---------|---------|---|---|---------|---------|---------|---|---|---------|---------|---------|---|---|
| 26.3510 | 39.1630 | 61.9870 | C | 0 | 38.3400 | 33.2790 | 69.9640 | H | 0 | 29.8230 | 36.4460 | 72.1370 | H | 0 |
| 26.5730 | 38.1040 | 62.1120 | H | 0 | 39.8140 | 31.8050 | 69.9550 | C | 0 | 31.3350 | 35.0150 | 71.9490 | C | 0 |
| 26.1730 | 39.5010 | 60.9660 | H | 0 | 40.7720 | 31.7380 | 69.4380 | H | 0 | 31.5440 | 34.1490 | 71.3210 | H | 0 |
| 27.2690 | 39.6640 | 62.2930 | H | 0 | 40.3020 | 32.2930 | 71.3040 | C | 0 | 32.2610 | 36.0670 | 71.4480 | C | 0 |
| 24.2000 | 37.0680 | 64.0740 | C | 0 | 40.7510 | 33.2850 | 71.2540 | H | 0 | 32.1570 | 36.9580 | 72.0680 | H | 0 |
| 23.7180 | 37.4380 | 65.1160 | O | 0 | 39.5030 | 32.3260 | 72.0440 | H | 0 | 33.3100 | 35.7750 | 71.3940 | H | 0 |
| 25.1900 | 36.1960 | 63.9440 | N | 0 | 41.3000 | 31.3840 | 71.9850 | C | 0 | 31.9340 | 36.2770 | 70.4300 | H | 0 |
| 25.6010 | 36.1000 | 63.0270 | H | 0 | 42.0750 | 30.6830 | 71.4110 | O | 0 | 31.6140 | 34.5870 | 73.4360 | C | 0 |
| 25.8480 | 35.4060 | 65.0230 | C | 0 | 41.1840 | 31.1140 | 73.2090 | N | 0 | 31.2210 | 33.5760 | 73.5430 | H | 0 |
| 25.2230 | 35.3510 | 65.9150 | H | 0 | 41.9090 | 30.6150 | 73.7050 | H | 0 | 32.6760 | 34.4850 | 73.6610 | H | 0 |
| 25.9790 | 33.8730 | 64.5990 | C | 0 | 40.3340 | 31.4760 | 73.6160 | H | 0 | 31.2530 | 35.3500 | 74.1250 | H | 0 |
| 26.6390 | 33.6900 | 63.7510 | H | 0 | 39.2610 | 30.3570 | 70.1950 | C | 0 | 27.3620 | 35.2590 | 72.1030 | C | 0 |
| 26.6820 | 33.1390 | 65.7700 | C | 0 | 39.9900 | 29.3640 | 69.9550 | O | 0 | 26.8450 | 35.5190 | 73.1730 | O | 0 |
| 27.7180 | 33.4770 | 65.7920 | H | 0 | 37.9320 | 30.1620 | 70.3790 | N | 0 | 26.8320 | 35.6010 | 70.9450 | N | 0 |
| 26.2640 | 33.2450 | 66.7710 | H | 0 | 37.3880 | 31.0090 | 70.4620 | H | 0 | 27.4510 | 35.4390 | 70.1650 | H | 0 |
| 26.8730 | 32.0900 | 65.5420 | H | 0 | 37.4260 | 28.7610 | 70.7050 | C | 0 | 25.3560 | 35.8680 | 70.8070 | C | 0 |
| 24.6480 | 33.3350 | 64.2240 | C | 0 | 38.1740 | 28.0180 | 70.4300 | H | 0 | 24.8490 | 35.1780 | 71.4810 | H | 0 |
| 23.8350 | 33.6850 | 64.8600 | H | 0 | 37.3510 | 28.6080 | 72.2750 | C | 0 | 25.0440 | 37.3520 | 71.1650 | C | 0 |
| 24.3970 | 33.8150 | 63.2780 | H | 0 | 37.2370 | 27.5360 | 72.4370 | H | 0 | 24.0230 | 37.5120 | 70.8170 | H | 0 |
| 24.3090 | 31.7950 | 64.1130 | C | 0 | 38.4740 | 29.1100 | 73.0420 | C | 0 | 25.0740 | 37.4710 | 72.2480 | H | 0 |
| 24.2830 | 31.3540 | 65.1090 | H | 0 | 39.3990 | 28.5680 | 72.8440 | H | 0 | 25.8060 | 38.4540 | 70.5450 | C | 0 |
| 23.3030 | 31.7590 | 63.6940 | H | 0 | 38.5780 | 30.1950 | 73.0320 | H | 0 | 26.9550 | 39.0470 | 71.0540 | C | 0 |
| 25.0590 | 31.3540 | 63.4560 | H | 0 | 38.2380 | 28.8540 | 74.0750 | H | 0 | 27.4950 | 38.7540 | 71.9430 | H | 0 |
| 27.2190 | 35.9790 | 65.3820 | C | 0 | 36.1340 | 29.1770 | 72.7730 | O | 0 | 27.4760 | 39.9140 | 70.1400 | N | 0 |
| 27.9290 | 36.5620 | 64.5570 | O | 0 | 36.3520 | 30.1080 | 72.8680 | H | 0 | 28.2640 | 40.5130 | 70.3440 | H | 0 |
| 27.5470 | 35.9590 | 66.7360 | N | 0 | 36.1320 | 28.2450 | 70.0410 | C | 0 | 26.6460 | 40.0880 | 69.0060 | C | 0 |
| 26.9680 | 35.3470 | 67.2930 | H | 0 | 35.6610 | 27.1350 | 70.3510 | O | 0 | 26.6190 | 41.0310 | 67.9420 | C | 0 |
| 28.8520 | 36.2610 | 67.2070 | C | 0 | 35.5310 | 28.9730 | 69.0670 | N | 0 | 27.3790 | 41.7760 | 67.7570 | H | 0 |
| 29.3980 | 36.4250 | 66.2780 | H | 0 | 35.9080 | 29.8580 | 68.7580 | H | 0 | 25.6060 | 40.9060 | 66.9760 | C | 0 |
| 28.9110 | 37.5240 | 68.0730 | C | 0 | 34.3450 | 28.5140 | 68.3830 | C | 0 | 25.6880 | 41.4810 | 66.0650 | H | 0 |
| 28.5900 | 38.3050 | 67.3840 | H | 0 | 34.1450 | 29.2920 | 67.6460 | H | 0 | 24.5970 | 39.9980 | 67.1720 | C | 0 |
| 28.1620 | 37.4870 | 68.8640 | H | 0 | 34.4950 | 27.5480 | 67.9020 | H | 0 | 23.9220 | 39.8450 | 66.3430 | H | 0 |
| 29.8640 | 37.6720 | 68.5820 | H | 0 | 33.0790 | 28.4130 | 69.2240 | C | 0 | 24.4890 | 39.1340 | 68.2800 | C | 0 |
| 29.4120 | 34.9390 | 67.7600 | C | 0 | 32.1200 | 27.8190 | 68.7600 | O | 0 | 23.6190 | 38.5060 | 68.3970 | H | 0 |
| 28.7060 | 34.2920 | 68.6030 | O | 0 | 32.9570 | 29.0910 | 70.3950 | N | 0 | 25.5600 | 39.1190 | 69.2430 | C | 0 |
| 30.5130 | 34.4690 | 67.2030 | N | 0 | 33.7370 | 29.6620 | 70.6870 | H | 0 | 24.8290 | 35.5630 | 69.3960 | C | 0 |
| 31.0320 | 35.0180 | 66.5320 | H | 0 | 31.6870 | 29.1940 | 71.1570 | C | 0 | 25.5170 | 35.2070 | 68.4880 | O | 0 |
| 31.3670 | 33.3810 | 67.6630 | C | 0 | 31.0550 | 28.3110 | 71.0690 | H | 0 | 23.5000 | 35.6370 | 69.2160 | N | 0 |
| 30.8740 | 32.8350 | 68.4680 | H | 0 | 31.9990 | 29.3590 | 72.6310 | C | 0 | 22.9610 | 35.8700 | 70.0380 | H | 0 |
| 31.7490 | 32.5230 | 66.4650 | C | 0 | 32.7340 | 30.1620 | 72.6920 | H | 0 | 22.6810 | 35.6470 | 67.9620 | C | 0 |
| 32.2900 | 33.1410 | 65.7480 | H | 0 | 31.0880 | 29.7060 | 73.1190 | H | 0 | 23.4300 | 35.8460 | 67.1960 | H | 0 |
| 32.4300 | 31.7200 | 66.7450 | H | 0 | 32.6020 | 28.0850 | 73.2610 | C | 0 | 22.1410 | 34.2480 | 67.6860 | C | 0 |
| 30.4920 | 31.8240 | 65.7450 | C | 0 | 33.5380 | 27.7920 | 72.7840 | H | 0 | 21.2930 | 34.1970 | 68.3690 | H | 0 |
| 29.6260 | 32.4460 | 65.5150 | H | 0 | 32.8100 | 28.3160 | 74.3060 | H | 0 | 21.7220 | 34.2380 | 66.6800 | H | 0 |
| 30.9550 | 31.2670 | 64.3960 | C | 0 | 31.6390 | 26.8500 | 73.2100 | C | 0 | 22.9810 | 32.9660 | 67.9880 | C | 0 |
| 31.5160 | 30.3340 | 64.3410 | H | 0 | 30.6840 | 27.1650 | 73.6290 | H | 0 | 23.9440 | 33.0890 | 67.4920 | H | 0 |
| 30.1230 | 31.1550 | 63.7000 | H | 0 | 31.5490 | 26.4140 | 72.2150 | H | 0 | 23.1360 | 32.9100 | 69.0660 | H | 0 |
| 31.5850 | 32.0640 | 64.0020 | H | 0 | 32.2320 | 25.7690 | 74.1820 | C | 0 | 22.2040 | 31.6890 | 67.6130 | C | 0 |
| 30.0480 | 30.7210 | 66.6380 | C | 0 | 33.2000 | 25.4080 | 73.8350 | H | 0 | 21.3480 | 31.5730 | 68.2780 | H | 0 |
| 30.7640 | 29.9110 | 66.5010 | H | 0 | 32.2010 | 26.2820 | 75.1430 | H | 0 | 21.9000 | 31.6940 | 66.5660 | H | 0 |
| 30.1070 | 31.0700 | 67.6690 | H | 0 | 31.2810 | 24.7100 | 74.3340 | N | 0 | 23.1830 | 30.5370 | 67.9400 | C | 0 |
| 28.9890 | 30.5660 | 66.4280 | H | 0 | 30.4240 | 24.9250 | 74.8240 | H | 0 | 24.0300 | 30.6890 | 67.2720 | H | 0 |
| 32.6900 | 33.9330 | 68.3160 | C | 0 | 31.1800 | 24.2410 | 73.4450 | H | 0 | 23.5160 | 30.6950 | 68.9660 | H | 0 |
| 33.2990 | 34.8930 | 67.8630 | O | 0 | 31.6350 | 23.9480 | 74.8950 | H | 0 | 22.5220 | 29.2000 | 67.7290 | N | 0 |
| 33.2040 | 33.1690 | 69.3100 | N | 0 | 30.7540 | 30.2380 | 70.6390 | C | 0 | 23.1700 | 28.4850 | 68.0260 | H | 0 |
| 32.5940 | 32.5000 | 69.7570 | H | 0 | 31.2150 | 31.2180 | 70.1920 | O | 0 | 21.6590 | 29.1560 | 68.2530 | H | 0 |
| 34.5400 | 33.4240 | 69.8840 | C | 0 | 29.4380 | 30.0910 | 70.8260 | N | 0 | 22.2960 | 29.0200 | 66.7610 | H | 0 |
| 34.6330 | 34.4990 | 70.0350 | H | 0 | 29.1440 | 29.1630 | 71.0960 | H | 0 | 21.5940 | 36.7120 | 67.9930 | C | 0 |
| 34.6310 | 32.7690 | 71.3220 | C | 0 | 28.3710 | 31.0550 | 70.5680 | C | 0 | 21.3070 | 37.2410 | 69.0620 | O | 0 |
| 34.0270 | 33.4020 | 71.9720 | H | 0 | 28.5510 | 31.5690 | 69.6230 | H | 0 | 21.0780 | 37.0720 | 66.8610 | N | 0 |
| 34.1010 | 31.8160 | 71.3350 | H | 0 | 27.0870 | 30.2490 | 70.5140 | C | 0 | 21.3890 | 36.6780 | 65.9850 | H | 0 |
| 35.9800 | 32.6690 | 71.8860 | C | 0 | 26.8930 | 29.7600 | 71.4690 | H | 0 | 20.0370 | 38.1260 | 66.6880 | C | 0 |
| 36.1320 | 31.9550 | 72.9390 | O | 0 | 26.2500 | 30.9190 | 70.3130 | H | 0 | 19.2060 | 38.0020 | 67.3820 | H | 0 |
| 36.8710 | 33.3730 | 71.4500 | O | 0 | 27.0110 | 29.2620 | 69.3360 | C | 0 | 20.6870 | 39.5290 | 66.9280 | C | 0 |
| 35.6700 | 32.9660 | 68.9260 | C | 0 | 27.0720 | 29.9890 | 68.5270 | H | 0 | 21.2050 | 39.5260 | 67.8870 | H | 0 |
| 35.8480 | 31.7990 | 68.5550 | O | 0 | 27.7920 | 28.5040 | 69.3920 | H | 0 | 21.4940 | 39.6550 | 66.2050 | H | 0 |
| 36.5050 | 33.9190 | 68.4630 | N | 0 | 25.6100 | 28.5700 | 69.3220 | C | 0 | 19.5840 | 40.6560 | 66.7970 | C | 0 |
| 36.2930 | 34.8140 | 68.8790 | H | 0 | 25.0410 | 28.3260 | 68.2270 | O | 0 | 20.1060 | 41.5430 | 67.1570 | H | 0 |
| 37.6190 | 33.6600 | 67.5320 | C | 0 | 25.0120 | 28.3350 | 70.3670 | O | 0 | 19.3060 | 40.7830 | 65.7510 | H | 0 |
| 37.1980 | 33.1310 | 66.6770 | H | 0 | 28.5260 | 32.1220 | 71.6650 | C | 0 | 18.1180 | 40.4490 | 67.7940 | S | 0 |
| 38.0960 | 35.0210 | 67.1470 | C | 0 | 28.3670 | 31.8630 | 72.8530 | O | 0 | 18.8450 | 40.3540 | 69.4630 | C | 0 |
| 38.4990 | 35.5800 | 67.9910 | H | 0 | 28.7310 | 33.3720 | 71.2430 | N | 0 | 19.3870 | 41.2700 | 69.6990 | H | 0 |
| 38.8310 | 35.0490 | 66.3420 | H | 0 | 28.8250 | 33.4830 | 70.2440 | H | 0 | 18.1460 | 40.0190 | 70.2300 | H | 0 |
| 37.2410 | 35.5970 | 66.7950 | H | 0 | 28.7620 | 34.5310 | 72.1160 | C | 0 | 19.6200 | 39.5870 | 69.4590 | H | 0 |
| 38.7010 | 32.7520 | 68.0450 | C | 0 | 28.8500 | 34.3280 | 73.1830 | H | 0 | 19.4830 | 38.0550 | 65.2980 | C | 0 |
| 39.5140 | 32.2090 | 67.2710 | O | 0 | 29.9000 | 35.4850 | 71.6280 | C | 0 | 20.1940 | 37.7990 | 64.2580 | O | 0 |
| 38.9040 | 32.7020 | 69.3570 | N | 0 | 29.7520 | 35.6070 | 70.5550 | H | 0 | 18.1910 | 38.2470 | 65.1510 | N | 0 |

|         |         |         |   |   |         |         |         |   |   |         |         |         |   |   |
|---------|---------|---------|---|---|---------|---------|---------|---|---|---------|---------|---------|---|---|
| 17.6510 | 38.3070 | 66.0020 | H | 0 | 10.5760 | 33.5400 | 57.7680 | H | 0 | 22.9770 | 37.9060 | 55.1520 | C | 0 |
| 17.4830 | 38.3730 | 63.8520 | C | 0 | 8.6580  | 33.2290 | 56.8140 | C | 0 | 23.2420 | 38.4320 | 56.0690 | H | 0 |
| 17.6220 | 37.4090 | 63.3630 | H | 0 | 8.3840  | 32.3430 | 56.2430 | H | 0 | 23.8140 | 37.2300 | 54.9800 | H | 0 |
| 16.0090 | 38.4850 | 64.3270 | C | 0 | 7.8980  | 33.1140 | 58.1900 | C | 0 | 22.8650 | 38.5630 | 54.2910 | H | 0 |
| 15.8640 | 37.8440 | 65.1970 | H | 0 | 6.8320  | 32.9380 | 58.0420 | H | 0 | 20.8570 | 37.7610 | 56.3040 | C | 0 |
| 15.8880 | 39.5180 | 64.6540 | H | 0 | 8.4790  | 31.9870 | 58.9880 | C | 0 | 20.7630 | 38.7090 | 55.7760 | H | 0 |
| 15.2030 | 38.0030 | 63.1890 | C | 0 | 9.4580  | 32.2640 | 59.3790 | H | 0 | 19.9130 | 37.2250 | 56.3980 | H | 0 |
| 15.3980 | 38.6700 | 62.3490 | H | 0 | 7.8080  | 31.6950 | 59.7950 | H | 0 | 21.2130 | 37.9280 | 57.7650 | C | 0 |
| 15.5030 | 36.9810 | 62.9570 | H | 0 | 8.5770  | 31.1010 | 58.3600 | H | 0 | 22.1080 | 38.5490 | 57.8080 | H | 0 |
| 13.6820 | 38.1150 | 63.4330 | C | 0 | 8.1450  | 34.1850 | 59.0310 | O | 0 | 20.3920 | 38.2670 | 58.3970 | H | 0 |
| 13.4600 | 38.0040 | 64.4940 | H | 0 | 9.0740  | 34.4180 | 59.0890 | H | 0 | 21.5060 | 36.9600 | 58.1710 | H | 0 |
| 13.4630 | 39.1110 | 63.0510 | H | 0 | 7.9930  | 34.4490 | 56.1240 | C | 0 | 21.9160 | 35.5590 | 53.2510 | C | 0 |
| 12.8520 | 37.1640 | 62.6040 | C | 0 | 6.7640  | 34.4890 | 55.9810 | O | 0 | 22.5420 | 34.6050 | 53.7460 | O | 0 |
| 11.8300 | 37.5390 | 62.6550 | H | 0 | 8.8130  | 35.3850 | 55.6390 | N | 0 | 22.0620 | 35.9510 | 51.9730 | N | 0 |
| 13.1820 | 37.1940 | 61.5650 | H | 0 | 9.7900  | 35.2700 | 55.8680 | H | 0 | 21.5570 | 36.7420 | 51.6010 | H | 0 |
| 13.0140 | 35.7400 | 63.0450 | N | 0 | 8.4240  | 36.4560 | 54.7390 | C | 0 | 23.1070 | 35.3520 | 51.0650 | C | 0 |
| 13.9710 | 35.4630 | 62.8790 | H | 0 | 7.3420  | 36.4360 | 54.6120 | H | 0 | 23.2840 | 34.3130 | 51.3420 | H | 0 |
| 12.8360 | 35.7540 | 64.0390 | H | 0 | 8.7290  | 37.7940 | 55.4030 | C | 0 | 22.5630 | 35.3080 | 49.5850 | C | 0 |
| 12.3780 | 35.0950 | 62.5970 | H | 0 | 9.7680  | 37.8300 | 55.7310 | H | 0 | 23.3380 | 34.8370 | 48.9820 | H | 0 |
| 17.8800 | 39.5510 | 63.0560 | C | 0 | 8.6610  | 38.6740 | 56.7630 | H | 0 | 21.3240 | 34.3280 | 49.3930 | C | 0 |
| 17.7670 | 40.6610 | 63.6640 | O | 0 | 7.8250  | 38.0390 | 56.6090 | C | 0 | 20.4870 | 34.6050 | 50.0330 | H | 0 |
| 18.1370 | 39.4720 | 61.7390 | N | 0 | 6.7730  | 38.1820 | 56.3640 | H | 0 | 21.1310 | 34.1220 | 48.3400 | H | 0 |
| 18.2760 | 38.5860 | 61.2740 | H | 0 | 7.8720  | 37.2720 | 57.3830 | H | 0 | 21.5090 | 33.3250 | 49.7760 | H | 0 |
| 17.9680 | 40.6070 | 60.8480 | C | 0 | 8.2760  | 39.3670 | 57.3120 | C | 0 | 22.1680 | 36.4660 | 49.0660 | O | 0 |
| 17.6310 | 41.4570 | 61.4410 | H | 0 | 9.2660  | 39.3610 | 57.7680 | H | 0 | 22.4390 | 36.3850 | 48.0890 | H | 0 |
| 19.3450 | 40.8070 | 60.1750 | C | 0 | 8.1440  | 40.1980 | 56.6190 | H | 0 | 24.4160 | 36.0810 | 51.2420 | C | 0 |
| 19.9890 | 41.3770 | 60.8450 | H | 0 | 7.2600  | 39.6890 | 58.4960 | C | 0 | 25.4500 | 35.6970 | 50.6840 | O | 0 |
| 19.8900 | 39.9230 | 59.8420 | H | 0 | 7.5250  | 40.6600 | 58.9140 | H | 0 | 24.5000 | 37.0480 | 52.1360 | N | 0 |
| 19.2450 | 41.6780 | 59.0320 | C | 0 | 6.2600  | 39.8120 | 58.0790 | H | 0 | 23.6440 | 37.4440 | 52.4960 | H | 0 |
| 19.0640 | 43.0660 | 59.1480 | N | 0 | 7.2180  | 38.7150 | 59.6030 | N | 0 | 25.6930 | 37.9710 | 52.2100 | C | 0 |
| 19.2360 | 43.5950 | 57.9280 | C | 0 | 6.5850  | 39.0870 | 60.2960 | H | 0 | 26.0690 | 38.0070 | 51.1870 | H | 0 |
| 19.2260 | 44.6220 | 57.5960 | H | 0 | 6.8850  | 37.8410 | 59.2210 | H | 0 | 25.3350 | 38.9500 | 52.5310 | H | 0 |
| 19.4520 | 42.6140 | 57.1120 | N | 0 | 8.1140  | 38.5590 | 60.0420 | H | 0 | 26.7780 | 37.4600 | 53.1630 | C | 0 |
| 19.9270 | 42.7180 | 56.2270 | H | 0 | 9.1210  | 36.3930 | 53.3320 | C | 0 | 26.8020 | 36.3450 | 53.7280 | O | 0 |
| 19.5240 | 41.4250 | 57.7280 | C | 0 | 8.8130  | 37.2110 | 52.5270 | O | 0 | 27.7090 | 38.3480 | 53.4560 | N | 0 |
| 19.9030 | 40.5020 | 57.3150 | H | 0 | 9.9050  | 35.4200 | 52.9310 | N | 0 | 27.6300 | 39.2020 | 52.9240 | H | 0 |
| 16.8580 | 40.2800 | 59.8050 | C | 0 | 9.9760  | 34.6720 | 53.6070 | H | 0 | 28.5510 | 38.3990 | 54.6670 | C | 0 |
| 16.0260 | 41.1220 | 59.4980 | O | 0 | 10.7420 | 35.3760 | 51.7370 | C | 0 | 28.1210 | 37.6990 | 55.3830 | H | 0 |
| 16.9980 | 39.1020 | 59.2110 | N | 0 | 10.8560 | 34.3270 | 51.4620 | H | 0 | 29.9380 | 37.9690 | 54.2510 | C | 0 |
| 17.5820 | 38.3880 | 59.6220 | H | 0 | 10.2250 | 35.7010 | 50.8340 | H | 0 | 30.3440 | 38.7750 | 53.6390 | H | 0 |
| 15.9800 | 38.5800 | 58.3290 | C | 0 | 12.1600 | 35.9410 | 51.7750 | C | 0 | 30.6610 | 37.8820 | 55.0610 | H | 0 |
| 15.4270 | 39.4210 | 57.9130 | H | 0 | 12.8520 | 35.8370 | 50.8110 | O | 0 | 29.8920 | 37.1330 | 53.5530 | H | 0 |
| 16.6150 | 38.0640 | 57.0400 | C | 0 | 12.5740 | 36.4470 | 52.9260 | N | 0 | 28.5170 | 39.7790 | 55.2970 | C | 0 |
| 17.6830 | 38.2610 | 56.9540 | H | 0 | 12.0840 | 36.3270 | 53.8020 | H | 0 | 28.1190 | 40.7980 | 54.6690 | O | 0 |
| 16.4310 | 36.9970 | 56.9090 | H | 0 | 13.9000 | 36.9870 | 53.2390 | C | 0 | 28.9830 | 39.9350 | 56.6120 | N | 0 |
| 16.1810 | 38.5720 | 56.1780 | H | 0 | 14.1640 | 37.7000 | 52.4590 | H | 0 | 29.4020 | 38.9530 | 57.6260 | C | 0 |
| 14.9740 | 37.6250 | 58.9200 | C | 0 | 13.7950 | 37.8670 | 54.5210 | C | 0 | 30.3200 | 38.4490 | 57.3230 | H | 0 |
| 15.0790 | 37.1840 | 60.0200 | O | 0 | 13.8530 | 37.3600 | 55.4840 | H | 0 | 28.6590 | 38.1610 | 57.7180 | H | 0 |
| 13.9030 | 37.2710 | 58.2350 | N | 0 | 14.6500 | 38.5410 | 54.4640 | H | 0 | 29.6190 | 39.6860 | 58.8970 | C | 0 |
| 13.8530 | 37.6070 | 57.2840 | H | 0 | 12.5390 | 38.8860 | 54.5770 | C | 0 | 30.5840 | 40.1930 | 58.8840 | H | 0 |
| 12.8450 | 36.3320 | 58.6310 | C | 0 | 12.3870 | 39.2620 | 53.5650 | H | 0 | 29.5790 | 38.9630 | 59.7120 | H | 0 |
| 13.2080 | 35.6980 | 59.4400 | H | 0 | 11.6600 | 38.3340 | 54.9070 | H | 0 | 28.4930 | 40.6910 | 58.8690 | C | 0 |
| 11.7370 | 37.2860 | 59.1300 | C | 0 | 12.8410 | 40.0110 | 55.4960 | C | 0 | 28.6160 | 41.4980 | 59.5910 | H | 0 |
| 12.1130 | 37.7210 | 60.0560 | H | 0 | 12.3070 | 41.0750 | 55.2310 | O | 0 | 27.6040 | 40.1000 | 59.0920 | H | 0 |
| 11.5500 | 38.0190 | 58.3450 | H | 0 | 13.6120 | 39.8190 | 56.4460 | O | 0 | 28.6610 | 41.1390 | 57.4330 | C | 0 |
| 10.5050 | 36.6040 | 59.5270 | C | 0 | 14.9630 | 35.9240 | 53.4130 | C | 0 | 27.7110 | 41.5330 | 57.0720 | H | 0 |
| 10.4950 | 35.3270 | 59.6350 | O | 0 | 14.7930 | 34.8350 | 53.9630 | O | 0 | 29.8000 | 42.2300 | 57.2040 | C | 0 |
| 9.6110  | 37.3400 | 59.9640 | O | 0 | 16.2060 | 36.3770 | 53.1480 | N | 0 | 30.7410 | 41.9370 | 56.4840 | O | 0 |
| 12.4220 | 35.5930 | 57.3840 | C | 0 | 16.3600 | 37.3160 | 52.8090 | H | 0 | 29.8250 | 43.3790 | 57.9100 | N | 0 |
| 11.8070 | 36.1810 | 56.4760 | O | 0 | 17.4430 | 35.5770 | 53.4260 | C | 0 | 29.0630 | 43.7430 | 58.4660 | H | 0 |
| 12.7590 | 34.3110 | 57.3780 | N | 0 | 17.1290 | 34.9330 | 54.2470 | H | 0 | 30.8660 | 44.4370 | 57.8590 | C | 0 |
| 13.3100 | 33.9910 | 58.1610 | H | 0 | 17.7030 | 34.7120 | 52.1810 | C | 0 | 31.8600 | 44.0690 | 57.6050 | H | 0 |
| 12.5080 | 33.4000 | 56.2250 | C | 0 | 18.7790 | 34.5470 | 52.2350 | H | 0 | 30.2850 | 45.3720 | 56.7050 | C | 0 |
| 12.9610 | 33.8960 | 55.3660 | H | 0 | 16.8660 | 33.4020 | 52.0240 | C | 0 | 30.4570 | 44.7280 | 55.8420 | H | 0 |
| 13.3420 | 32.1220 | 56.5110 | C | 0 | 17.0120 | 32.7830 | 52.9100 | H | 0 | 29.2170 | 45.5860 | 56.7410 | H | 0 |
| 14.3870 | 32.3950 | 56.6590 | H | 0 | 15.7900 | 33.5700 | 52.0710 | H | 0 | 30.9870 | 46.7400 | 56.7360 | C | 0 |
| 12.8040 | 31.3770 | 57.7420 | C | 0 | 17.2750 | 32.9010 | 51.1470 | H | 0 | 30.8860 | 47.2000 | 57.7190 | H | 0 |
| 13.5020 | 30.6340 | 58.1290 | H | 0 | 17.6480 | 35.4190 | 50.9670 | O | 0 | 32.4960 | 46.8220 | 56.4400 | C | 0 |
| 12.8430 | 32.0820 | 58.5720 | H | 0 | 16.7790 | 35.3730 | 50.5610 | H | 0 | 32.7650 | 46.6030 | 55.4060 | H | 0 |
| 11.7840 | 31.0510 | 57.5420 | H | 0 | 18.6160 | 36.5020 | 53.8500 | C | 0 | 32.8610 | 47.8400 | 56.5790 | H | 0 |
| 13.3930 | 31.0300 | 55.4740 | C | 0 | 18.6280 | 37.6630 | 53.7340 | O | 0 | 32.9570 | 46.1700 | 57.1820 | H | 0 |
| 12.4370 | 30.8840 | 54.9720 | H | 0 | 19.7350 | 35.8400 | 54.2470 | N | 0 | 30.2850 | 47.6890 | 55.6900 | C | 0 |
| 14.2250 | 31.3060 | 54.8260 | H | 0 | 19.6280 | 34.8510 | 54.4220 | H | 0 | 29.2310 | 47.4290 | 55.7790 | H | 0 |
| 13.7820 | 30.1150 | 55.9210 | H | 0 | 21.0610 | 36.4430 | 54.1390 | C | 0 | 30.5430 | 48.7220 | 55.9220 | H | 0 |
| 11.0040 | 33.1410 | 55.9100 | C | 0 | 21.0140 | 37.3310 | 53.5090 | H | 0 | 30.6010 | 47.4280 | 54.6800 | H | 0 |
| 10.6520 | 32.8090 | 54.7520 | O | 0 | 21.7460 | 36.9680 | 55.4260 | C | 0 | 31.1390 | 45.0600 | 59.2550 | C | 0 |
| 10.1500 | 33.3110 | 56.8820 | N | 0 | 21.9770 | 36.0660 | 55.9940 | H | 0 | 30.2280 | 45.2890 | 60.0190 | O | 0 |

|         |         |         |   |   |         |         |         |   |   |         |         |         |   |   |
|---------|---------|---------|---|---|---------|---------|---------|---|---|---------|---------|---------|---|---|
| 32.3680 | 45.2670 | 59.6680 | N | 0 | 27.6920 | 51.6490 | 65.1020 | H | 0 | 16.9830 | 43.2440 | 51.8240 | H | 0 |
| 33.0380 | 44.9600 | 58.9760 | H | 0 | 25.9820 | 51.0660 | 65.0940 | H | 0 | 16.2690 | 44.2540 | 52.9840 | H | 0 |
| 32.8310 | 45.6830 | 60.9790 | C | 0 | 26.4560 | 52.2400 | 66.6500 | C | 0 | 16.8870 | 41.9830 | 54.2280 | C | 0 |
| 31.9060 | 45.3970 | 61.4800 | H | 0 | 25.9240 | 52.9910 | 66.0660 | H | 0 | 17.1870 | 41.1960 | 54.9200 | H | 0 |
| 34.0960 | 44.9040 | 61.4350 | C | 0 | 25.7950 | 51.8280 | 67.4130 | H | 0 | 15.9810 | 42.3090 | 54.7390 | H | 0 |
| 34.8910 | 45.0890 | 60.7120 | H | 0 | 27.6290 | 53.0370 | 67.2270 | N | 0 | 16.7070 | 41.3040 | 53.3940 | H | 0 |
| 34.6740 | 45.4180 | 62.7300 | C | 0 | 28.5650 | 52.6820 | 67.3600 | H | 0 | 19.3260 | 41.7650 | 52.1770 | C | 0 |
| 33.9180 | 45.2720 | 63.5010 | H | 0 | 27.9500 | 53.7420 | 66.5790 | H | 0 | 19.7050 | 42.4340 | 51.2380 | O | 0 |
| 35.5210 | 44.7910 | 63.0100 | H | 0 | 27.3070 | 53.4680 | 68.0820 | H | 0 | 18.9340 | 40.5150 | 51.9910 | N | 0 |
| 34.9430 | 46.4520 | 62.5140 | H | 0 | 29.2460 | 46.9200 | 64.8360 | C | 0 | 18.8430 | 40.0940 | 52.9050 | H | 0 |
| 33.9030 | 43.3490 | 61.5820 | C | 0 | 30.0660 | 47.3520 | 64.1050 | O | 0 | 18.8130 | 39.7720 | 50.7900 | C | 0 |
| 34.8700 | 43.0170 | 61.9600 | H | 0 | 28.6130 | 45.7910 | 64.6460 | N | 0 | 19.2310 | 40.3040 | 49.9360 | H | 0 |
| 33.1990 | 43.2410 | 62.4070 | H | 0 | 27.9610 | 45.5870 | 65.3890 | H | 0 | 19.7210 | 38.5300 | 50.8150 | C | 0 |
| 33.5930 | 42.9630 | 60.6100 | H | 0 | 28.5810 | 44.9980 | 63.4020 | C | 0 | 19.5690 | 37.9180 | 51.7040 | H | 0 |
| 32.9970 | 47.2140 | 60.9880 | C | 0 | 29.3930 | 45.3650 | 62.7740 | H | 0 | 19.5820 | 37.9050 | 49.9330 | H | 0 |
| 33.6730 | 47.7540 | 60.1710 | O | 0 | 28.6880 | 43.4630 | 63.6160 | C | 0 | 21.0780 | 38.9850 | 50.9300 | O | 0 |
| 32.4770 | 47.8210 | 62.0020 | N | 0 | 29.5510 | 43.3980 | 64.2780 | H | 0 | 21.3270 | 39.0760 | 50.0070 | H | 0 |
| 31.9540 | 47.2210 | 62.6230 | H | 0 | 27.4420 | 42.8230 | 64.2560 | C | 0 | 17.3330 | 39.5220 | 50.5060 | C | 0 |
| 32.1870 | 49.2800 | 62.1010 | C | 0 | 26.5480 | 43.0940 | 63.6950 | H | 0 | 16.5370 | 39.1610 | 51.3850 | O | 0 |
| 32.9680 | 49.7480 | 61.5020 | H | 0 | 27.5700 | 41.7460 | 64.1480 | H | 0 | 16.9400 | 39.5020 | 49.2370 | N | 0 |
| 30.7680 | 49.5350 | 61.5400 | C | 0 | 27.3780 | 43.2240 | 65.2680 | H | 0 | 17.6050 | 39.6570 | 48.4930 | H | 0 |
| 30.1050 | 48.9110 | 62.1390 | H | 0 | 28.9790 | 42.7360 | 62.3110 | C | 0 | 15.5940 | 39.0780 | 48.7140 | C | 0 |
| 30.3830 | 51.0730 | 61.6730 | C | 0 | 29.7280 | 43.2800 | 61.7370 | H | 0 | 15.4380 | 38.0050 | 48.8250 | H | 0 |
| 31.2570 | 51.6860 | 61.4510 | H | 0 | 29.3070 | 41.7050 | 62.4400 | H | 0 | 14.8210 | 39.3690 | 49.4250 | H | 0 |
| 29.5440 | 51.4290 | 61.0760 | H | 0 | 28.0860 | 42.6600 | 61.6910 | H | 0 | 15.4020 | 39.4740 | 47.2240 | C | 0 |
| 30.1300 | 51.2830 | 62.7120 | H | 0 | 27.4140 | 45.4610 | 62.5520 | C | 0 | 16.3050 | 39.1410 | 46.4260 | O | 0 |
| 30.3450 | 49.1430 | 60.1640 | C | 0 | 26.4470 | 46.0150 | 63.1410 | O | 0 | 14.2870 | 40.0820 | 46.8470 | N | 0 |
| 30.7970 | 49.7720 | 59.3970 | H | 0 | 27.5940 | 45.4140 | 61.2220 | N | 0 | 13.5960 | 40.3450 | 47.5350 | H | 0 |
| 30.5430 | 48.0850 | 59.9890 | H | 0 | 28.5070 | 45.1790 | 60.8600 | H | 0 | 14.0040 | 40.2990 | 45.4200 | C | 0 |
| 29.2700 | 49.3190 | 60.1370 | H | 0 | 26.6230 | 45.9130 | 60.1530 | C | 0 | 14.7490 | 40.9600 | 44.9770 | H | 0 |
| 32.4170 | 49.6750 | 63.5400 | C | 0 | 25.7670 | 46.3260 | 60.6880 | H | 0 | 14.2990 | 39.4170 | 44.8530 | H | 0 |
| 31.4540 | 49.9530 | 64.2700 | O | 0 | 27.2310 | 47.2030 | 59.5180 | C | 0 | 12.5080 | 40.5770 | 45.1310 | C | 0 |
| 33.6440 | 49.7520 | 64.0330 | N | 0 | 27.5370 | 47.8460 | 60.3440 | H | 0 | 11.8220 | 40.9770 | 46.1130 | O | 0 |
| 34.4430 | 49.4710 | 63.4830 | H | 0 | 28.1300 | 46.8690 | 59.0010 | H | 0 | 12.0280 | 40.4260 | 43.9560 | N | 0 |
| 33.9870 | 50.0890 | 65.4470 | C | 0 | 26.3380 | 48.0510 | 58.5690 | C | 0 | 12.6980 | 40.1710 | 43.2440 | H | 0 |
| 35.0190 | 49.7730 | 65.6040 | H | 0 | 25.4010 | 47.5050 | 58.4590 | H | 0 | 10.8530 | 41.0830 | 43.3360 | C | 0 |
| 34.0480 | 51.6240 | 65.6550 | C | 0 | 25.9330 | 49.4300 | 59.2470 | C | 0 | 10.8830 | 42.1210 | 43.6680 | H | 0 |
| 33.0980 | 52.0770 | 65.9400 | H | 0 | 25.2810 | 49.2170 | 60.0940 | H | 0 | 10.9400 | 41.0590 | 41.7630 | C | 0 |
| 34.6590 | 51.6630 | 66.5560 | H | 0 | 26.8120 | 49.9740 | 59.5930 | H | 0 | 11.1270 | 40.0420 | 41.4190 | H | 0 |
| 34.7310 | 52.4160 | 64.5420 | C | 0 | 25.2210 | 49.9460 | 58.6030 | H | 0 | 9.9950  | 41.4070 | 41.3470 | H | 0 |
| 35.4370 | 51.8100 | 63.9750 | H | 0 | 27.0520 | 48.2950 | 57.2290 | C | 0 | 12.0050 | 42.0610 | 41.3010 | C | 0 |
| 33.9110 | 52.7610 | 63.9110 | H | 0 | 27.2020 | 47.3650 | 56.6810 | H | 0 | 11.8460 | 42.1990 | 40.2320 | H | 0 |
| 35.4250 | 53.7840 | 65.0060 | C | 0 | 26.5320 | 49.0100 | 56.5910 | H | 0 | 11.9210 | 43.0040 | 41.8410 | H | 0 |
| 36.1790 | 53.6450 | 65.7810 | H | 0 | 28.0860 | 48.6080 | 57.3690 | H | 0 | 13.4090 | 41.5990 | 41.4750 | C | 0 |
| 35.8940 | 54.1720 | 64.1020 | H | 0 | 26.2950 | 44.9340 | 59.1220 | C | 0 | 13.6990 | 40.4250 | 41.6370 | O | 0 |
| 34.3350 | 54.7300 | 65.5490 | C | 0 | 27.1230 | 44.1110 | 58.7410 | O | 0 | 14.2850 | 42.4890 | 41.4360 | O | 0 |
| 33.6130 | 54.7390 | 64.7320 | H | 0 | 25.0070 | 45.0390 | 58.6500 | N | 0 | 9.4990  | 40.5120 | 43.8080 | C | 0 |
| 33.8990 | 54.2130 | 66.4040 | H | 0 | 24.4430 | 45.7300 | 59.1240 | H | 0 | 8.4340  | 41.0830 | 43.6550 | O | 0 |
| 34.9290 | 55.9970 | 66.0390 | N | 0 | 24.3470 | 43.9100 | 57.9410 | C | 0 | 9.5600  | 39.4940 | 44.6270 | N | 0 |
| 35.5780 | 55.8460 | 66.7980 | H | 0 | 25.1850 | 43.4860 | 57.3880 | H | 0 | 10.4130 | 39.0130 | 44.8740 | H | 0 |
| 35.4610 | 56.4760 | 65.3270 | H | 0 | 23.7450 | 42.7940 | 58.9420 | C | 0 | 8.4490  | 38.9590 | 45.4690 | C | 0 |
| 34.2430 | 56.6870 | 66.3090 | H | 0 | 22.9170 | 43.1790 | 59.5370 | H | 0 | 7.4690  | 39.0830 | 45.0090 | H | 0 |
| 33.1760 | 49.1830 | 66.3860 | C | 0 | 22.9810 | 41.7070 | 58.1280 | C | 0 | 8.7830  | 37.5070 | 45.7020 | C | 0 |
| 33.1110 | 47.9570 | 66.3170 | O | 0 | 23.6180 | 41.2040 | 57.4010 | H | 0 | 8.0530  | 37.0860 | 46.3930 | H | 0 |
| 32.4230 | 49.7920 | 67.3460 | N | 0 | 22.5390 | 40.9180 | 58.7360 | H | 0 | 8.6840  | 37.0810 | 44.7040 | H | 0 |
| 32.2880 | 50.7920 | 67.3080 | H | 0 | 22.2300 | 42.1910 | 57.5030 | H | 0 | 10.1320 | 37.1840 | 46.1980 | C | 0 |
| 31.5500 | 49.1940 | 68.3300 | C | 0 | 24.7880 | 42.0960 | 59.7530 | C | 0 | 11.1880 | 36.8120 | 45.3270 | C | 0 |
| 32.1150 | 48.3700 | 68.7650 | H | 0 | 24.5060 | 41.2420 | 60.3690 | H | 0 | 10.9850 | 36.7610 | 44.2680 | H | 0 |
| 31.2760 | 50.3960 | 69.3420 | C | 0 | 25.5850 | 41.6510 | 59.1580 | H | 0 | 12.5130 | 36.5270 | 45.8020 | C | 0 |
| 30.8340 | 49.9660 | 70.2410 | H | 0 | 25.1590 | 42.8300 | 60.4690 | H | 0 | 13.3670 | 36.3800 | 45.1570 | H | 0 |
| 32.2260 | 50.7930 | 69.7010 | H | 0 | 23.3630 | 44.4660 | 56.9340 | C | 0 | 12.7510 | 36.7010 | 47.1350 | C | 0 |
| 30.4670 | 51.6660 | 68.9020 | C | 0 | 22.4230 | 45.2480 | 57.3190 | O | 0 | 13.7840 | 36.5640 | 47.4210 | H | 0 |
| 30.0080 | 52.3980 | 69.8080 | O | 0 | 23.4460 | 44.0990 | 55.6530 | N | 0 | 11.7040 | 36.9540 | 48.0420 | C | 0 |
| 30.4150 | 51.9030 | 67.6640 | O | 0 | 24.2300 | 43.5220 | 55.3850 | H | 0 | 11.8840 | 37.2130 | 49.0750 | H | 0 |
| 30.2090 | 48.6910 | 67.8230 | C | 0 | 22.4390 | 44.3420 | 54.6240 | C | 0 | 10.3640 | 37.1770 | 47.5560 | C | 0 |
| 29.3930 | 48.2990 | 68.6330 | O | 0 | 21.8420 | 45.2470 | 54.7330 | H | 0 | 9.6510  | 37.5520 | 48.2750 | H | 0 |
| 29.9760 | 48.5250 | 66.4980 | N | 0 | 22.8230 | 44.3480 | 53.6030 | H | 0 | 8.2070  | 39.7720 | 46.7330 | C | 0 |
| 30.7060 | 48.9150 | 65.9190 | H | 0 | 21.4240 | 43.2130 | 54.5390 | C | 0 | 7.4460  | 39.3700 | 47.5350 | O | 0 |
| 28.7610 | 47.8620 | 65.9390 | C | 0 | 21.5370 | 42.1600 | 55.2050 | O | 0 | 8.7020  | 41.0140 | 46.7850 | N | 0 |
| 28.3260 | 47.2460 | 66.7260 | H | 0 | 20.2560 | 43.4190 | 53.8700 | N | 0 | 9.3150  | 41.3520 | 46.0560 | H | 0 |
| 27.6890 | 48.8400 | 65.4390 | C | 0 | 20.0760 | 44.2490 | 53.3240 | H | 0 | 8.1000  | 42.0780 | 47.6560 | C | 0 |
| 28.1820 | 49.3230 | 64.5950 | H | 0 | 19.2980 | 42.3960 | 53.6000 | C | 0 | 7.9520  | 42.9880 | 47.0740 | H | 0 |
| 26.8870 | 48.3300 | 64.9050 | H | 0 | 19.5130 | 41.6030 | 54.3160 | H | 0 | 7.1510  | 41.6910 | 48.0270 | H | 0 |
| 27.2920 | 49.9000 | 66.4350 | C | 0 | 17.9150 | 43.0210 | 53.8500 | C | 0 | 8.9630  | 42.3620 | 48.9260 | C | 0 |
| 26.4910 | 49.5220 | 67.0700 | H | 0 | 18.0650 | 43.5250 | 54.8040 | H | 0 | 8.5180  | 42.9510 | 49.9390 | O | 0 |
| 28.1530 | 50.1480 | 67.0560 | H | 0 | 17.2400 | 43.8570 | 52.6880 | C | 0 | 10.2490 | 41.9800 | 48.9030 | N | 0 |
| 26.8880 | 51.1990 | 65.6850 | C | 0 | 17.9930 | 44.6140 | 52.4700 | H | 0 | 10.5680 | 41.4620 | 48.0960 | H | 0 |

|         |         |         |   |   |         |         |         |   |   |         |         |         |   |   |
|---------|---------|---------|---|---|---------|---------|---------|---|---|---------|---------|---------|---|---|
| 11.2660 | 42.3960 | 49.9090 | C | 0 | 23.1530 | 47.9360 | 57.3010 | H | 0 | 28.6170 | 43.7850 | 71.6980 | N | 0 |
| 10.9440 | 42.2920 | 50.9450 | H | 0 | 23.6530 | 49.4250 | 56.3890 | H | 0 | 28.3380 | 44.7530 | 71.6270 | H | 0 |
| 12.4340 | 41.3650 | 49.8910 | C | 0 | 22.0020 | 48.3690 | 54.6150 | C | 0 | 28.5730 | 43.1160 | 73.0230 | C | 0 |
| 13.0380 | 41.3340 | 48.9840 | H | 0 | 22.7030 | 49.0680 | 54.1590 | H | 0 | 29.4560 | 42.5430 | 73.3060 | H | 0 |
| 13.2460 | 41.5650 | 51.1850 | C | 0 | 22.5260 | 47.4140 | 54.6510 | H | 0 | 28.5920 | 44.2400 | 74.0540 | C | 0 |
| 12.6990 | 41.1900 | 52.0490 | H | 0 | 21.1570 | 48.2080 | 53.9470 | H | 0 | 27.6630 | 44.7590 | 73.8180 | H | 0 |
| 14.1290 | 40.9430 | 51.0370 | H | 0 | 20.0340 | 48.3070 | 57.9790 | C | 0 | 28.5900 | 43.9340 | 75.1000 | H | 0 |
| 13.4410 | 42.6260 | 51.3420 | H | 0 | 19.2190 | 49.1280 | 58.2960 | O | 0 | 29.7980 | 45.1890 | 73.9630 | C | 0 |
| 11.8800 | 39.8810 | 50.0430 | C | 0 | 20.7420 | 47.6470 | 58.8480 | N | 0 | 30.9420 | 44.7980 | 74.2080 | O | 0 |
| 11.0960 | 39.8900 | 50.7990 | H | 0 | 21.4620 | 47.0020 | 58.5560 | H | 0 | 29.5970 | 46.3930 | 73.4670 | N | 0 |
| 11.4110 | 39.5270 | 49.1250 | H | 0 | 20.7590 | 47.8320 | 60.3370 | C | 0 | 30.3120 | 47.0940 | 73.5920 | H | 0 |
| 12.7260 | 39.2670 | 50.3530 | H | 0 | 20.2850 | 48.8040 | 60.4720 | H | 0 | 28.6860 | 46.6260 | 73.0980 | H | 0 |
| 11.7770 | 43.7960 | 49.7320 | C | 0 | 20.2150 | 47.0720 | 60.8980 | H | 0 | 27.3530 | 42.1830 | 73.2040 | C | 0 |
| 12.2050 | 44.1550 | 48.6360 | O | 0 | 22.1520 | 47.7160 | 60.8890 | C | 0 | 27.3870 | 41.1750 | 73.8830 | O | 0 |
| 11.6390 | 44.5740 | 50.7830 | N | 0 | 23.0780 | 47.0680 | 60.3310 | O | 0 | 26.2450 | 42.6640 | 72.6840 | N | 0 |
| 11.3730 | 44.1250 | 51.6480 | H | 0 | 22.3670 | 48.2550 | 62.0790 | N | 0 | 26.2750 | 43.5560 | 72.2110 | H | 0 |
| 12.0230 | 46.0010 | 50.8310 | C | 0 | 21.5410 | 48.6170 | 62.5340 | H | 0 | 24.8850 | 42.1090 | 73.0230 | C | 0 |
| 12.2070 | 46.3200 | 49.8050 | H | 0 | 23.5760 | 47.9910 | 62.8390 | C | 0 | 24.9440 | 41.1580 | 73.5530 | H | 0 |
| 10.9070 | 46.8180 | 51.4770 | C | 0 | 24.2620 | 47.3570 | 62.2780 | H | 0 | 24.1750 | 42.9580 | 74.0840 | C | 0 |
| 9.9270  | 46.5760 | 51.0630 | H | 0 | 24.2950 | 49.3690 | 62.9940 | C | 0 | 23.2110 | 42.5230 | 74.3470 | H | 0 |
| 10.8160 | 46.5230 | 52.5230 | H | 0 | 23.5500 | 50.0740 | 63.3620 | H | 0 | 24.7900 | 43.2000 | 75.3810 | C | 0 |
| 11.1940 | 48.3550 | 51.3820 | C | 0 | 25.1050 | 49.3480 | 63.7240 | H | 0 | 25.1480 | 42.2440 | 75.7610 | H | 0 |
| 12.2130 | 48.5780 | 51.6980 | H | 0 | 24.7160 | 49.6260 | 62.0220 | H | 0 | 25.5490 | 43.9100 | 75.0510 | H | 0 |
| 11.1060 | 48.7520 | 50.3700 | H | 0 | 23.2620 | 47.3120 | 64.1880 | C | 0 | 24.0290 | 43.5560 | 76.0750 | H | 0 |
| 10.3150 | 49.0140 | 52.4830 | C | 0 | 22.2760 | 47.5920 | 64.7850 | O | 0 | 23.8690 | 44.2260 | 73.5170 | O | 0 |
| 9.2560  | 48.8790 | 52.2620 | H | 0 | 24.2910 | 46.6220 | 64.7240 | N | 0 | 24.7140 | 44.5700 | 73.2190 | H | 0 |
| 10.4780 | 48.6190 | 53.4850 | H | 0 | 25.2090 | 46.5030 | 64.3210 | H | 0 | 23.9720 | 41.9050 | 71.7830 | C | 0 |
| 10.6110 | 50.4290 | 52.4780 | N | 0 | 24.0970 | 45.7530 | 65.8330 | C | 0 | 22.9330 | 41.3200 | 71.9200 | O | 0 |
| 11.2400 | 50.8100 | 51.7850 | H | 0 | 23.1490 | 46.0550 | 66.2790 | H | 0 | 24.3290 | 42.4440 | 70.6150 | N | 0 |
| 10.2100 | 51.3520 | 53.3520 | C | 0 | 23.8700 | 44.2990 | 65.3470 | C | 0 | 25.2800 | 42.7200 | 70.4180 | H | 0 |
| 9.4480  | 51.0830 | 54.3690 | N | 0 | 24.7400 | 43.8930 | 64.8310 | H | 0 | 23.4090 | 42.2310 | 69.4060 | C | 0 |
| 9.4160  | 50.1020 | 54.6060 | H | 0 | 23.7600 | 43.6720 | 66.2320 | H | 0 | 23.9890 | 42.5270 | 68.5320 | H | 0 |
| 9.1650  | 51.8080 | 55.0120 | H | 0 | 22.6840 | 44.0320 | 64.4590 | C | 0 | 23.1090 | 41.1830 | 69.4060 | H | 0 |
| 10.4140 | 52.5820 | 53.2150 | N | 0 | 22.8580 | 44.1100 | 63.1160 | C | 0 | 22.1630 | 43.1420 | 69.4170 | C | 0 |
| 11.0130 | 52.9310 | 52.4810 | H | 0 | 23.8030 | 44.2500 | 62.6120 | H | 0 | 21.3360 | 43.0840 | 68.4470 | O | 0 |
| 10.0690 | 53.1290 | 53.9910 | H | 0 | 21.6810 | 44.0870 | 62.2960 | C | 0 | 22.0430 | 44.0930 | 70.3740 | N | 0 |
| 13.4180 | 46.1870 | 51.4090 | C | 0 | 21.7680 | 44.1520 | 61.2220 | H | 0 | 22.7140 | 44.1000 | 71.1290 | H | 0 |
| 13.6600 | 45.8390 | 52.5270 | O | 0 | 20.4580 | 43.7570 | 62.9030 | C | 0 | 21.0100 | 45.0840 | 70.2920 | C | 0 |
| 14.3150 | 46.8250 | 50.6530 | N | 0 | 19.2980 | 43.7840 | 62.1490 | O | 0 | 20.1090 | 44.4980 | 70.4730 | H | 0 |
| 14.0670 | 47.2600 | 49.7760 | H | 0 | 19.4760 | 43.6290 | 61.2180 | H | 0 | 21.1940 | 46.2100 | 71.3340 | C | 0 |
| 15.7120 | 46.9160 | 50.9370 | C | 0 | 20.3330 | 43.5800 | 64.3030 | C | 0 | 21.0840 | 45.7570 | 72.3190 | H | 0 |
| 16.1050 | 45.9120 | 51.0970 | H | 0 | 19.3930 | 43.3570 | 64.7840 | H | 0 | 22.1960 | 46.6380 | 71.3670 | H | 0 |
| 16.1910 | 47.3790 | 50.0740 | H | 0 | 21.4200 | 43.8170 | 65.1220 | C | 0 | 20.1570 | 47.3300 | 71.3740 | C | 0 |
| 15.9090 | 47.8600 | 52.2180 | C | 0 | 21.3250 | 43.9400 | 66.1910 | H | 0 | 18.9690 | 47.0840 | 71.2590 | O | 0 |
| 15.2180 | 48.8720 | 52.3760 | O | 0 | 25.2570 | 45.8180 | 66.7820 | C | 0 | 20.6130 | 48.5330 | 71.7050 | N | 0 |
| 16.8440 | 47.3170 | 53.0830 | N | 0 | 26.3870 | 45.5390 | 66.4180 | O | 0 | 19.9260 | 49.2550 | 71.8700 | H | 0 |
| 17.1770 | 46.3740 | 52.9410 | H | 0 | 25.0120 | 46.2160 | 68.0400 | N | 0 | 21.5770 | 48.7710 | 71.8880 | H | 0 |
| 17.1770 | 47.9990 | 54.3640 | C | 0 | 24.0680 | 46.4200 | 68.3350 | H | 0 | 20.9850 | 45.7490 | 68.8720 | C | 0 |
| 17.1230 | 49.0730 | 54.1860 | H | 0 | 26.0610 | 46.2870 | 69.0460 | C | 0 | 22.0270 | 46.1730 | 68.3330 | O | 0 |
| 16.0510 | 47.7200 | 55.3560 | C | 0 | 26.7860 | 47.0710 | 68.8310 | H | 0 | 19.7620 | 45.8430 | 68.2800 | N | 0 |
| 16.1630 | 48.3410 | 56.2450 | H | 0 | 25.4360 | 46.5990 | 70.4560 | C | 0 | 18.9610 | 45.3590 | 68.6600 | H | 0 |
| 15.0930 | 48.0600 | 54.9640 | H | 0 | 25.1410 | 47.6490 | 70.4410 | H | 0 | 19.5880 | 46.6480 | 67.0550 | C | 0 |
| 15.8350 | 46.3120 | 55.8240 | C | 0 | 24.5480 | 45.9770 | 70.5690 | H | 0 | 20.3710 | 46.4080 | 66.3360 | H | 0 |
| 15.9850 | 45.6270 | 54.9890 | H | 0 | 26.3200 | 46.2040 | 71.6530 | C | 0 | 18.2630 | 46.3120 | 66.2920 | C | 0 |
| 16.6460 | 46.1970 | 56.5430 | H | 0 | 25.8560 | 45.5690 | 72.6720 | O | 0 | 18.1230 | 45.2420 | 66.1400 | H | 0 |
| 14.6270 | 45.9820 | 56.6710 | C | 0 | 27.4950 | 46.5470 | 71.6350 | O | 0 | 17.4560 | 46.5810 | 66.9740 | H | 0 |
| 14.5790 | 46.6650 | 57.5190 | H | 0 | 26.8250 | 45.0250 | 69.1830 | C | 0 | 18.2270 | 47.1360 | 65.0050 | C | 0 |
| 13.6950 | 46.1670 | 56.1370 | H | 0 | 26.2810 | 43.9350 | 69.3700 | O | 0 | 18.4590 | 48.1870 | 65.1730 | H | 0 |
| 14.7830 | 44.5660 | 57.0630 | N | 0 | 28.1710 | 45.1530 | 69.1130 | N | 0 | 18.9910 | 46.9060 | 64.2620 | H | 0 |
| 15.1710 | 44.2950 | 57.9560 | H | 0 | 28.4540 | 46.1150 | 68.9880 | H | 0 | 16.8000 | 47.0310 | 64.4400 | C | 0 |
| 14.2180 | 43.4890 | 56.5560 | C | 0 | 29.1770 | 44.0480 | 69.2780 | C | 0 | 16.7880 | 47.1060 | 63.3530 | H | 0 |
| 13.2880 | 43.5970 | 55.6440 | N | 0 | 28.9730 | 43.3600 | 68.4570 | H | 0 | 16.4920 | 46.0330 | 64.7500 | H | 0 |
| 13.1080 | 44.5290 | 55.3000 | H | 0 | 30.6720 | 44.5890 | 69.0940 | C | 0 | 16.0030 | 48.0260 | 65.1250 | N | 0 |
| 12.7850 | 42.7310 | 55.5100 | H | 0 | 31.2470 | 43.6670 | 69.1740 | H | 0 | 16.2070 | 48.3780 | 66.0500 | H | 0 |
| 14.4940 | 42.3420 | 57.0800 | N | 0 | 30.8230 | 45.1700 | 67.7290 | C | 0 | 14.8440 | 48.4050 | 64.6910 | C | 0 |
| 15.1280 | 42.2140 | 57.8550 | H | 0 | 30.2290 | 46.0810 | 67.6640 | H | 0 | 14.0950 | 47.7820 | 63.7580 | N | 0 |
| 14.1360 | 41.4480 | 56.7740 | H | 0 | 31.8590 | 45.4410 | 67.5240 | H | 0 | 14.4970 | 46.9440 | 63.3630 | H | 0 |
| 18.5220 | 47.5870 | 54.8590 | C | 0 | 30.4560 | 44.4290 | 67.0190 | H | 0 | 13.2650 | 48.2680 | 63.4510 | H | 0 |
| 18.9960 | 46.4670 | 54.6130 | O | 0 | 31.1270 | 45.5960 | 70.1540 | C | 0 | 14.3930 | 49.5420 | 65.0860 | N | 0 |
| 19.0790 | 48.3750 | 55.7590 | N | 0 | 30.6540 | 46.5590 | 69.9590 | H | 0 | 14.9980 | 50.0560 | 65.7110 | H | 0 |
| 18.6820 | 49.2850 | 55.9440 | H | 0 | 30.7640 | 45.3670 | 71.1560 | H | 0 | 13.5920 | 49.9360 | 64.6140 | H | 0 |
| 20.3350 | 48.0560 | 56.4770 | C | 0 | 32.6520 | 45.7460 | 70.3390 | C | 0 | 19.7160 | 48.1200 | 67.4540 | C | 0 |
| 20.5840 | 47.0000 | 56.3730 | H | 0 | 32.9850 | 44.7960 | 70.7570 | H | 0 | 18.9290 | 48.5070 | 68.2620 | O | 0 |
| 21.6200 | 48.8300 | 55.9810 | C | 0 | 33.1570 | 45.9380 | 69.3930 | H | 0 | 20.6320 | 48.9260 | 66.9090 | N | 0 |
| 21.3780 | 49.8870 | 55.8650 | H | 0 | 32.8980 | 46.4330 | 71.1480 | H | 0 | 21.3260 | 48.5470 | 66.2810 | H | 0 |
| 22.8530 | 48.9130 | 56.9230 | C | 0 | 29.1350 | 43.2710 | 70.5860 | C | 0 | 20.7930 | 50.2880 | 67.3850 | C | 0 |
| 22.5290 | 49.4260 | 57.8290 | H | 0 | 29.4910 | 42.0830 | 70.5990 | O | 0 | 20.5460 | 50.2940 | 68.4460 | H | 0 |

|         |         |         |   |   |         |         |         |   |   |         |         |         |   |   |
|---------|---------|---------|---|---|---------|---------|---------|---|---|---------|---------|---------|---|---|
| 22.1920 | 50.9070 | 67.2410 | C | 0 | 11.8200 | 48.6480 | 56.7180 | C | 0 | 10.7300 | 61.4120 | 59.8470 | C | 0 |
| 22.3920 | 50.8840 | 66.1700 | H | 0 | 11.2110 | 47.6750 | 57.3910 | O | 0 | 11.2650 | 62.0860 | 59.1780 | H | 0 |
| 22.3860 | 52.3090 | 67.8360 | C | 0 | 11.1080 | 46.8840 | 56.8570 | H | 0 | 9.7180  | 61.7990 | 59.9630 | H | 0 |
| 21.6440 | 53.0780 | 67.6220 | H | 0 | 12.2980 | 48.4120 | 55.3900 | C | 0 | 11.4700 | 61.3910 | 61.1640 | C | 0 |
| 22.4600 | 52.2700 | 68.9230 | H | 0 | 12.2630 | 47.3900 | 55.0400 | H | 0 | 12.4450 | 62.2360 | 61.2560 | O | 0 |
| 23.3880 | 52.7010 | 67.6650 | H | 0 | 12.8760 | 49.4700 | 54.6810 | C | 0 | 11.1650 | 60.7130 | 62.1980 | O | 0 |
| 23.2570 | 50.0020 | 67.7840 | C | 0 | 13.3380 | 49.2180 | 53.7380 | H | 0 | 12.1880 | 58.0660 | 58.7560 | C | 0 |
| 23.0890 | 48.9540 | 67.5380 | H | 0 | 15.8840 | 52.2840 | 53.1710 | C | 0 | 12.0610 | 57.4790 | 59.8210 | O | 0 |
| 24.1960 | 50.3330 | 67.3410 | H | 0 | 16.6190 | 53.2730 | 53.2520 | O | 0 | 12.4420 | 57.3660 | 57.5870 | N | 0 |
| 23.2230 | 49.9470 | 68.8720 | H | 0 | 15.7020 | 51.6960 | 52.0030 | N | 0 | 12.3980 | 57.7810 | 56.6670 | H | 0 |
| 19.7570 | 51.1490 | 66.6010 | C | 0 | 15.2630 | 50.7880 | 52.0620 | H | 0 | 12.6680 | 55.9290 | 57.5610 | C | 0 |
| 19.1140 | 51.9310 | 67.2040 | O | 0 | 16.3940 | 52.0500 | 50.7410 | C | 0 | 13.0740 | 55.7590 | 58.5580 | H | 0 |
| 19.6240 | 50.9010 | 65.3350 | N | 0 | 17.3170 | 52.5940 | 50.9400 | H | 0 | 11.3560 | 55.2410 | 57.4010 | C | 0 |
| 20.1630 | 50.1630 | 64.9050 | H | 0 | 16.7790 | 50.8090 | 49.8770 | C | 0 | 11.4610 | 54.1960 | 57.6920 | H | 0 |
| 18.6920 | 51.5710 | 64.4680 | C | 0 | 15.9460 | 50.1250 | 49.7120 | H | 0 | 10.6010 | 55.7220 | 58.0230 | H | 0 |
| 17.7510 | 51.8150 | 64.9590 | H | 0 | 17.2090 | 51.0550 | 48.9060 | H | 0 | 10.7940 | 55.2920 | 55.9910 | C | 0 |
| 19.3080 | 52.9610 | 64.0870 | C | 0 | 17.8630 | 50.1330 | 50.4660 | O | 0 | 10.9330 | 56.2400 | 55.4720 | H | 0 |
| 18.7640 | 53.4100 | 63.2560 | H | 0 | 18.0530 | 49.4730 | 49.7950 | H | 0 | 11.3030 | 54.6330 | 55.2880 | H | 0 |
| 19.0550 | 53.5830 | 64.9460 | H | 0 | 15.6410 | 52.9770 | 49.8160 | C | 0 | 9.3900  | 54.7690 | 56.0130 | C | 0 |
| 20.7370 | 52.9040 | 63.8330 | C | 0 | 16.1610 | 53.3670 | 48.7900 | O | 0 | 8.5380  | 55.4200 | 56.5810 | O | 0 |
| 21.7150 | 53.3800 | 64.6200 | C | 0 | 14.4800 | 53.3650 | 50.2070 | N | 0 | 9.2040  | 53.6080 | 55.5850 | O | 0 |
| 21.5400 | 53.7930 | 65.6020 | H | 0 | 14.2950 | 53.0440 | 51.1470 | H | 0 | 13.7390 | 55.3530 | 56.6310 | C | 0 |
| 22.9110 | 53.4180 | 63.9650 | N | 0 | 13.5000 | 54.2710 | 49.4670 | C | 0 | 14.3870 | 54.3490 | 56.9830 | O | 0 |
| 23.7220 | 53.9510 | 64.2430 | H | 0 | 14.0150 | 55.1690 | 49.1280 | H | 0 | 14.0600 | 56.1140 | 55.5690 | N | 0 |
| 22.9200 | 52.7390 | 62.8140 | C | 0 | 12.9580 | 53.5640 | 48.2290 | C | 0 | 13.2960 | 56.6280 | 55.1560 | H | 0 |
| 23.9580 | 52.4870 | 61.9350 | C | 0 | 12.2760 | 54.2800 | 47.7730 | H | 0 | 15.3910 | 56.1260 | 54.9620 | C | 0 |
| 24.9590 | 52.8390 | 62.1390 | H | 0 | 13.7570 | 53.4100 | 47.5030 | H | 0 | 15.5910 | 55.0670 | 54.8000 | H | 0 |
| 23.5590 | 51.8560 | 60.7280 | C | 0 | 12.1200 | 52.2960 | 48.3530 | C | 0 | 15.2960 | 56.8430 | 53.6220 | C | 0 |
| 24.3190 | 51.7100 | 59.9760 | H | 0 | 11.2410 | 52.5540 | 48.9440 | H | 0 | 14.8680 | 57.8070 | 53.8970 | H | 0 |
| 22.2350 | 51.4940 | 60.5060 | C | 0 | 11.6730 | 52.0600 | 47.3870 | H | 0 | 16.6550 | 56.8360 | 52.9600 | C | 0 |
| 22.0220 | 50.8760 | 59.6460 | H | 0 | 12.8000 | 51.0910 | 49.0280 | C | 0 | 17.0160 | 55.8250 | 52.7710 | H | 0 |
| 21.2580 | 51.6740 | 61.4530 | C | 0 | 12.9020 | 50.9610 | 50.2440 | O | 0 | 16.6750 | 57.4070 | 52.0320 | H | 0 |
| 20.2140 | 51.4610 | 61.2800 | H | 0 | 13.3360 | 50.1690 | 48.2270 | N | 0 | 17.3280 | 57.3510 | 53.6450 | H | 0 |
| 21.5140 | 52.4080 | 62.6290 | C | 0 | 13.6530 | 49.3140 | 48.6600 | H | 0 | 14.3830 | 56.1060 | 52.7020 | C | 0 |
| 18.3860 | 50.7220 | 63.2430 | C | 0 | 13.1310 | 50.1800 | 47.2380 | H | 0 | 14.5810 | 56.5330 | 51.7190 | H | 0 |
| 19.0090 | 49.6360 | 63.1680 | O | 0 | 12.4010 | 54.7090 | 50.4940 | C | 0 | 14.5910 | 55.0360 | 52.6790 | H | 0 |
| 17.4980 | 51.1530 | 62.3320 | N | 0 | 12.2680 | 54.0620 | 51.5440 | O | 0 | 13.2980 | 56.1910 | 52.7570 | H | 0 |
| 16.9530 | 51.9120 | 62.7140 | H | 0 | 11.6560 | 55.7260 | 50.1480 | N | 0 | 16.4870 | 56.6610 | 55.9090 | C | 0 |
| 17.2180 | 50.5840 | 61.0110 | C | 0 | 11.9630 | 56.3360 | 49.4040 | H | 0 | 17.6200 | 56.3780 | 55.7150 | O | 0 |
| 18.0950 | 50.1020 | 60.5780 | H | 0 | 10.5270 | 56.2830 | 50.8680 | C | 0 | 16.1540 | 57.5210 | 56.9000 | N | 0 |
| 16.1020 | 49.5070 | 61.1580 | C | 0 | 9.7060  | 56.4150 | 50.1630 | H | 0 | 15.1720 | 57.7210 | 56.7810 | H | 0 |
| 16.3500 | 48.8010 | 61.9510 | H | 0 | 10.1620 | 55.6340 | 51.6630 | H | 0 | 16.8840 | 58.3120 | 57.8840 | C | 0 |
| 15.1720 | 50.0040 | 61.4340 | H | 0 | 10.7840 | 57.6140 | 51.6130 | C | 0 | 16.1690 | 59.0110 | 58.3190 | H | 0 |
| 15.7450 | 48.6700 | 59.8930 | C | 0 | 11.7130 | 58.3140 | 51.2130 | O | 0 | 17.4530 | 57.3780 | 58.9720 | C | 0 |
| 15.8410 | 49.2700 | 58.9880 | H | 0 | 10.1460 | 57.7710 | 52.8170 | N | 0 | 18.1700 | 56.6710 | 58.5540 | H | 0 |
| 16.5330 | 47.4320 | 59.7780 | C | 0 | 8.9100  | 57.1400 | 53.2500 | C | 0 | 18.1170 | 57.9930 | 59.5800 | H | 0 |
| 17.5530 | 47.8110 | 59.7060 | H | 0 | 9.3030  | 56.2670 | 53.7700 | H | 0 | 16.4820 | 56.6440 | 59.8400 | C | 0 |
| 16.3040 | 46.7890 | 60.6280 | H | 0 | 8.2900  | 56.8750 | 52.3930 | H | 0 | 15.7060 | 56.2390 | 59.1900 | H | 0 |
| 16.2660 | 46.8600 | 58.8900 | H | 0 | 8.1080  | 58.1310 | 54.0850 | C | 0 | 17.1500 | 55.6330 | 60.7480 | C | 0 |
| 14.2860 | 48.2370 | 60.0950 | C | 0 | 7.4650  | 57.6960 | 54.8500 | H | 0 | 18.0500 | 55.9830 | 61.2520 | H | 0 |
| 13.6700 | 49.1260 | 60.2350 | H | 0 | 7.4200  | 58.6450 | 53.4130 | H | 0 | 16.4530 | 55.1590 | 61.4390 | H | 0 |
| 13.9000 | 47.7420 | 59.2040 | H | 0 | 9.1330  | 59.1080 | 54.6590 | C | 0 | 17.4640 | 54.7650 | 60.1680 | H | 0 |
| 14.2040 | 47.5050 | 60.8990 | H | 0 | 9.4910  | 58.8030 | 55.6420 | H | 0 | 15.6770 | 57.5590 | 60.7960 | C | 0 |
| 16.9510 | 51.7460 | 59.9810 | C | 0 | 8.7490  | 60.1200 | 54.7900 | H | 0 | 15.0710 | 58.3510 | 60.3550 | H | 0 |
| 16.2760 | 52.7320 | 60.2890 | O | 0 | 10.2810 | 58.9550 | 53.6150 | C | 0 | 14.8860 | 56.9750 | 61.2660 | H | 0 |
| 17.4320 | 51.5250 | 58.7550 | N | 0 | 10.1610 | 59.8700 | 53.0340 | H | 0 | 16.3770 | 57.9300 | 61.5440 | H | 0 |
| 18.0410 | 50.7460 | 58.5480 | H | 0 | 11.6180 | 59.1490 | 54.2330 | C | 0 | 17.9550 | 59.2370 | 57.1820 | C | 0 |
| 17.2000 | 52.4400 | 57.6420 | C | 0 | 12.3680 | 58.2340 | 54.4360 | O | 0 | 19.0560 | 58.7740 | 56.7900 | O | 0 |
| 16.3830 | 53.1200 | 57.8860 | H | 0 | 11.9680 | 60.3960 | 54.5260 | N | 0 | 17.6860 | 60.5450 | 57.1560 | N | 0 |
| 18.4870 | 53.2820 | 57.5310 | C | 0 | 11.3090 | 61.1440 | 54.3650 | H | 0 | 16.7330 | 60.7340 | 57.4290 | H | 0 |
| 18.6660 | 53.9050 | 58.4070 | H | 0 | 13.2540 | 60.7250 | 55.2020 | C | 0 | 18.5470 | 61.5190 | 56.4190 | C | 0 |
| 19.3810 | 52.6690 | 57.4100 | H | 0 | 14.0990 | 60.2710 | 54.6840 | H | 0 | 19.3690 | 61.0520 | 55.8780 | H | 0 |
| 18.3310 | 53.9860 | 56.7130 | H | 0 | 13.5890 | 62.2380 | 55.0670 | C | 0 | 17.6070 | 62.3500 | 55.4390 | C | 0 |
| 16.8370 | 51.7640 | 56.2640 | C | 0 | 12.9490 | 62.8320 | 55.7190 | H | 0 | 16.5710 | 62.0510 | 55.6010 | H | 0 |
| 17.5310 | 50.8030 | 55.8680 | O | 0 | 14.5560 | 62.5040 | 55.4940 | H | 0 | 17.7010 | 63.4250 | 55.5950 | H | 0 |
| 15.8280 | 52.3090 | 55.5790 | N | 0 | 13.4640 | 62.8560 | 53.6710 | C | 0 | 17.8960 | 62.1000 | 53.8750 | C | 0 |
| 15.2480 | 52.8940 | 56.1630 | H | 0 | 13.3580 | 64.0820 | 53.6100 | O | 0 | 18.9400 | 62.3720 | 53.7160 | H | 0 |
| 15.2050 | 51.6460 | 54.4220 | C | 0 | 13.3900 | 62.1720 | 52.6390 | O | 0 | 17.6940 | 60.6330 | 53.5610 | C | 0 |
| 15.3700 | 50.5700 | 54.4640 | H | 0 | 13.2920 | 60.4300 | 56.7080 | C | 0 | 18.0840 | 60.2830 | 52.6060 | H | 0 |
| 13.6450 | 51.7840 | 54.4160 | C | 0 | 14.3500 | 60.4190 | 57.2470 | O | 0 | 18.2060 | 60.0840 | 54.3520 | H | 0 |
| 13.4540 | 52.7960 | 54.7720 | H | 0 | 12.1770 | 60.2070 | 57.3970 | N | 0 | 16.6190 | 60.4520 | 53.5770 | H | 0 |
| 13.3730 | 51.7380 | 53.3610 | H | 0 | 11.3090 | 60.4070 | 56.9200 | H | 0 | 16.9920 | 62.9280 | 52.9550 | C | 0 |
| 12.9700 | 50.7450 | 55.2290 | C | 0 | 12.0320 | 59.6000 | 58.7050 | C | 0 | 17.1280 | 62.7710 | 51.8850 | H | 0 |
| 12.3990 | 51.0050 | 56.5400 | C | 0 | 12.8270 | 59.9140 | 59.3810 | H | 0 | 15.9680 | 62.7190 | 53.2640 | H | 0 |
| 12.3620 | 52.0120 | 56.9290 | H | 0 | 10.6780 | 59.9850 | 59.2460 | C | 0 | 17.1560 | 63.9870 | 53.1540 | H | 0 |
| 11.7630 | 49.9540 | 57.2690 | C | 0 | 9.9960  | 59.8800 | 58.4020 | H | 0 | 19.1270 | 62.4610 | 57.5100 | C | 0 |
| 11.2930 | 50.2130 | 58.2070 | H | 0 | 10.3630 | 59.3160 | 60.0470 | H | 0 | 18.4200 | 62.8770 | 58.4350 | O | 0 |

|         |         |         |   |   |         |         |         |   |   |         |         |         |   |   |
|---------|---------|---------|---|---|---------|---------|---------|---|---|---------|---------|---------|---|---|
| 20.3990 | 62.8130 | 57.3300 | N | 0 | 26.2340 | 69.1100 | 52.2830 | H | 0 | 26.3960 | 67.5920 | 40.0160 | H | 0 |
| 20.9460 | 62.4890 | 56.5460 | H | 0 | 26.6700 | 70.7600 | 51.7870 | H | 0 | 21.2290 | 66.6780 | 41.1670 | C | 0 |
| 20.9470 | 63.8710 | 58.0630 | C | 0 | 26.2820 | 70.6120 | 53.8930 | C | 0 | 20.3960 | 66.1170 | 40.5180 | O | 0 |
| 20.5300 | 63.8490 | 59.0700 | H | 0 | 26.1020 | 71.6870 | 53.8880 | H | 0 | 21.7450 | 66.0520 | 42.2350 | N | 0 |
| 22.4810 | 63.6040 | 58.2620 | C | 0 | 25.5660 | 70.1060 | 54.5400 | H | 0 | 22.4170 | 66.5130 | 42.8310 | H | 0 |
| 22.5580 | 62.5440 | 58.5040 | H | 0 | 27.6620 | 70.1910 | 54.4030 | C | 0 | 21.4150 | 64.6320 | 42.6110 | C | 0 |
| 23.0370 | 63.8740 | 57.3640 | H | 0 | 27.7250 | 69.1070 | 54.4990 | H | 0 | 21.5600 | 63.9310 | 41.7890 | H | 0 |
| 23.0310 | 64.3040 | 59.5450 | C | 0 | 28.3490 | 70.5100 | 53.6200 | H | 0 | 22.2790 | 64.2010 | 43.7830 | C | 0 |
| 24.1890 | 64.0380 | 59.8940 | O | 0 | 27.8710 | 70.8370 | 55.6870 | N | 0 | 22.0410 | 64.7930 | 44.6670 | H | 0 |
| 22.3210 | 65.1160 | 60.1270 | O | 0 | 28.2850 | 71.7580 | 55.6760 | H | 0 | 22.1560 | 63.1520 | 44.0540 | H | 0 |
| 20.6500 | 65.2330 | 57.4030 | C | 0 | 26.9590 | 71.0970 | 56.0350 | H | 0 | 23.7830 | 64.3520 | 43.5860 | C | 0 |
| 20.2160 | 65.3520 | 56.2850 | O | 0 | 28.3230 | 70.2010 | 56.3290 | H | 0 | 24.3570 | 65.2160 | 42.6560 | N | 0 |
| 20.8730 | 66.2780 | 58.2180 | N | 0 | 25.1810 | 70.6850 | 49.6280 | C | 0 | 25.6790 | 65.0370 | 42.6730 | C | 0 |
| 21.1340 | 66.1290 | 59.1820 | H | 0 | 24.9340 | 71.8250 | 49.2850 | O | 0 | 26.4570 | 65.4510 | 42.0480 | H | 0 |
| 20.7770 | 67.6710 | 57.7400 | C | 0 | 26.2160 | 69.9900 | 49.1450 | N | 0 | 25.9270 | 64.1590 | 43.6360 | N | 0 |
| 19.7590 | 67.9700 | 57.4920 | H | 0 | 26.3290 | 69.0240 | 49.4150 | H | 0 | 26.8740 | 63.8820 | 43.8510 | H | 0 |
| 21.3220 | 68.5320 | 58.8990 | C | 0 | 26.9550 | 70.6040 | 48.0400 | C | 0 | 24.7750 | 63.7260 | 44.2930 | C | 0 |
| 22.3960 | 68.3610 | 58.9620 | H | 0 | 27.0910 | 71.6670 | 48.2400 | H | 0 | 24.7120 | 63.0020 | 45.0920 | H | 0 |
| 21.3010 | 69.5980 | 58.6770 | H | 0 | 28.3290 | 69.8340 | 47.7910 | C | 0 | 20.0080 | 64.4690 | 43.1070 | C | 0 |
| 20.8620 | 68.2190 | 60.1850 | O | 0 | 28.0300 | 68.8100 | 47.5680 | H | 0 | 19.5730 | 63.3420 | 43.3900 | O | 0 |
| 20.2190 | 68.9100 | 60.3610 | H | 0 | 28.8730 | 70.1090 | 46.8870 | H | 0 | 19.3350 | 65.4930 | 43.5290 | N | 0 |
| 21.5950 | 68.0260 | 56.5590 | C | 0 | 29.2930 | 70.0020 | 48.9300 | C | 0 | 19.8410 | 66.3580 | 43.4050 | H | 0 |
| 21.1790 | 68.8230 | 55.7700 | O | 0 | 30.2390 | 69.5890 | 48.5800 | H | 0 | 18.1030 | 65.4810 | 44.3090 | C | 0 |
| 22.8380 | 67.4570 | 56.4930 | N | 0 | 29.4150 | 71.0730 | 49.0900 | H | 0 | 17.3430 | 66.1810 | 43.9600 | H | 0 |
| 23.0590 | 66.9100 | 57.3120 | H | 0 | 28.9370 | 69.3460 | 50.2620 | C | 0 | 17.7200 | 64.4700 | 44.1700 | H | 0 |
| 23.8850 | 67.7170 | 55.5820 | C | 0 | 28.2700 | 68.2740 | 50.3690 | O | 0 | 18.3940 | 65.7530 | 45.7500 | C | 0 |
| 23.9020 | 68.7860 | 55.3690 | H | 0 | 29.4190 | 69.8760 | 51.3560 | O | 0 | 19.5510 | 66.0010 | 46.1730 | O | 0 |
| 25.1850 | 67.2330 | 56.3040 | C | 0 | 26.2790 | 70.5040 | 46.6560 | C | 0 | 17.3490 | 65.5660 | 46.5720 | N | 0 |
| 25.2280 | 66.1630 | 56.5070 | H | 0 | 26.5690 | 71.3220 | 45.7260 | O | 0 | 16.5370 | 65.0680 | 46.2370 | H | 0 |
| 25.9510 | 67.4800 | 55.5680 | H | 0 | 25.3260 | 69.5700 | 46.4360 | N | 0 | 17.3630 | 65.9220 | 47.9980 | C | 0 |
| 25.5120 | 68.1470 | 57.5520 | C | 0 | 25.0660 | 68.9640 | 47.2000 | H | 0 | 18.3310 | 65.5640 | 48.3470 | H | 0 |
| 25.7550 | 67.5810 | 58.6410 | O | 0 | 24.7440 | 69.2150 | 45.1270 | C | 0 | 17.3490 | 67.0110 | 47.9780 | H | 0 |
| 25.5050 | 69.4210 | 57.3510 | O | 0 | 25.0400 | 70.0750 | 44.5280 | H | 0 | 16.1990 | 65.4310 | 48.8380 | C | 0 |
| 23.5880 | 66.9550 | 54.2100 | C | 0 | 25.3980 | 67.9000 | 44.5670 | C | 0 | 15.4850 | 64.4910 | 48.4230 | O | 0 |
| 24.4510 | 67.0590 | 53.3210 | O | 0 | 25.1150 | 67.0030 | 45.1170 | H | 0 | 15.9990 | 65.9980 | 50.0290 | N | 0 |
| 22.4220 | 66.3070 | 54.0300 | N | 0 | 25.1010 | 67.6360 | 43.5520 | H | 0 | 16.6440 | 67.2450 | 50.5660 | C | 0 |
| 21.6770 | 66.4790 | 54.6890 | H | 0 | 26.9180 | 67.9730 | 44.5990 | C | 0 | 16.6960 | 67.9860 | 49.7680 | H | 0 |
| 22.0630 | 65.4070 | 52.8610 | C | 0 | 27.5870 | 68.8850 | 43.7820 | C | 0 | 17.6830 | 67.1310 | 50.8770 | H | 0 |
| 22.7280 | 64.5420 | 52.8610 | H | 0 | 27.0290 | 69.4850 | 43.0780 | H | 0 | 15.7450 | 67.6300 | 51.7310 | C | 0 |
| 20.6030 | 64.8600 | 53.0410 | C | 0 | 28.9540 | 69.0930 | 43.8570 | C | 0 | 15.0150 | 68.4170 | 51.5440 | H | 0 |
| 20.6130 | 64.4080 | 54.0340 | H | 0 | 29.5220 | 69.8350 | 43.3150 | H | 0 | 16.3220 | 67.9800 | 42.5870 | H | 0 |
| 19.8090 | 65.6060 | 53.0320 | H | 0 | 29.6200 | 68.2460 | 44.7770 | C | 0 | 15.1480 | 66.2990 | 52.2890 | C | 0 |
| 20.3490 | 63.6880 | 52.0280 | C | 0 | 30.6810 | 68.3460 | 44.9480 | H | 0 | 14.2540 | 66.6290 | 52.8170 | H | 0 |
| 21.1290 | 62.5350 | 52.1610 | C | 0 | 28.9840 | 67.2590 | 45.4200 | C | 0 | 15.8320 | 65.6760 | 52.8650 | H | 0 |
| 21.8450 | 62.4500 | 52.9650 | H | 0 | 29.6380 | 66.8200 | 46.1580 | H | 0 | 14.9620 | 65.4960 | 50.9360 | C | 0 |
| 20.9230 | 61.5440 | 51.1550 | C | 0 | 27.6250 | 67.1400 | 45.4350 | C | 0 | 15.1940 | 64.4510 | 51.1390 | H | 0 |
| 21.4280 | 60.5890 | 51.1700 | H | 0 | 27.1610 | 66.4420 | 46.1150 | H | 0 | 13.5320 | 65.6180 | 50.3670 | C | 0 |
| 19.9210 | 61.6790 | 50.1760 | C | 0 | 23.2090 | 69.1610 | 44.9490 | C | 0 | 13.2020 | 66.6470 | 49.7730 | O | 0 |
| 19.7920 | 60.8460 | 49.5010 | H | 0 | 22.6020 | 68.1130 | 45.0120 | O | 0 | 12.6630 | 64.5280 | 50.5220 | N | 0 |
| 19.1310 | 62.8750 | 50.1350 | C | 0 | 22.5720 | 70.2840 | 44.5850 | N | 0 | 12.9480 | 63.8110 | 51.1740 | H | 0 |
| 18.3410 | 62.9940 | 49.4090 | H | 0 | 23.1100 | 71.6210 | 44.4140 | C | 0 | 11.2990 | 64.3710 | 49.9370 | C | 0 |
| 19.4240 | 63.8670 | 51.0210 | C | 0 | 23.6010 | 71.7050 | 43.4450 | H | 0 | 10.6610 | 63.7740 | 50.5890 | H | 0 |
| 18.8060 | 64.7520 | 51.0390 | H | 0 | 23.7300 | 72.0230 | 45.2160 | H | 0 | 10.8480 | 65.3510 | 49.7830 | H | 0 |
| 22.2070 | 66.1620 | 51.5300 | C | 0 | 21.9030 | 72.5660 | 44.2960 | C | 0 | 11.2510 | 63.5740 | 48.6240 | C | 0 |
| 21.4760 | 67.1120 | 51.4000 | O | 0 | 22.1880 | 73.3360 | 43.5800 | H | 0 | 10.1940 | 63.0930 | 48.1160 | O | 0 |
| 23.1400 | 65.8480 | 50.6490 | N | 0 | 21.5540 | 72.8320 | 45.2940 | H | 0 | 12.4260 | 63.5370 | 47.9380 | N | 0 |
| 23.8500 | 65.1940 | 50.9460 | H | 0 | 20.9120 | 71.6790 | 43.5890 | C | 0 | 13.2430 | 63.8870 | 48.4170 | H | 0 |
| 23.4030 | 66.5160 | 49.2990 | C | 0 | 21.1300 | 71.5170 | 42.5330 | H | 0 | 12.4830 | 62.9030 | 46.5520 | C | 0 |
| 24.3510 | 66.1500 | 48.9070 | H | 0 | 19.8920 | 72.0320 | 43.7400 | H | 0 | 11.7680 | 63.2650 | 45.8130 | H | 0 |
| 22.3280 | 65.9870 | 48.3120 | C | 0 | 21.1430 | 70.2820 | 44.1610 | C | 0 | 13.8580 | 63.2790 | 46.0010 | C | 0 |
| 21.3210 | 66.3430 | 48.5320 | H | 0 | 20.4680 | 70.0190 | 44.9750 | H | 0 | 14.6690 | 62.9460 | 46.6500 | H | 0 |
| 22.5530 | 66.5360 | 47.3970 | H | 0 | 20.8350 | 69.2420 | 43.0230 | C | 0 | 14.0170 | 62.7880 | 45.0410 | H | 0 |
| 22.3220 | 64.5020 | 48.1700 | C | 0 | 19.7620 | 68.6310 | 43.0140 | O | 0 | 13.9960 | 64.8250 | 45.6140 | C | 0 |
| 23.0810 | 63.7510 | 48.7550 | O | 0 | 21.7450 | 68.9950 | 42.1070 | N | 0 | 14.9230 | 65.0130 | 44.8410 | O | 0 |
| 21.3730 | 64.0160 | 47.3990 | N | 0 | 22.6510 | 69.4370 | 42.1690 | H | 0 | 13.2170 | 65.7370 | 45.9490 | O | 0 |
| 21.3140 | 63.0130 | 47.2920 | H | 0 | 21.4430 | 68.1960 | 40.9360 | C | 0 | 12.3720 | 61.3750 | 46.6630 | C | 0 |
| 20.8030 | 64.5920 | 46.7960 | H | 0 | 20.4980 | 68.6060 | 40.5790 | H | 0 | 11.8480 | 60.6770 | 45.8230 | O | 0 |
| 23.5500 | 68.0630 | 49.3900 | C | 0 | 22.4510 | 68.4350 | 39.8530 | C | 0 | 12.9910 | 60.8230 | 47.6650 | N | 0 |
| 23.2630 | 68.7110 | 48.3870 | O | 0 | 21.9610 | 68.0550 | 38.9560 | H | 0 | 13.4770 | 61.4380 | 48.3020 | H | 0 |
| 24.0600 | 68.5620 | 50.4730 | N | 0 | 22.4440 | 69.4740 | 39.5260 | H | 0 | 12.9400 | 59.3660 | 48.0180 | C | 0 |
| 24.1640 | 67.8810 | 51.2110 | H | 0 | 23.9010 | 67.8880 | 40.0400 | C | 0 | 13.2650 | 58.8270 | 47.1280 | H | 0 |
| 24.2000 | 69.9850 | 50.6730 | C | 0 | 23.8330 | 66.9270 | 40.5510 | H | 0 | 13.4850 | 59.1700 | 48.9410 | H | 0 |
| 23.2410 | 70.4260 | 50.3980 | H | 0 | 24.3110 | 67.6040 | 39.0710 | H | 0 | 11.4710 | 58.8280 | 48.2070 | C | 0 |
| 24.5080 | 70.3390 | 52.1320 | C | 0 | 24.9310 | 68.7550 | 40.7650 | C | 0 | 11.1200 | 57.6820 | 47.9640 | O | 0 |
| 24.1780 | 71.3520 | 52.3650 | H | 0 | 24.6370 | 69.6860 | 41.5000 | O | 0 | 10.6190 | 59.7500 | 48.6710 | N | 0 |
| 23.9620 | 69.7110 | 52.8360 | H | 0 | 26.2400 | 68.4210 | 40.5710 | N | 0 | 11.0050 | 60.6530 | 48.9060 | H | 0 |
| 26.0380 | 70.1690 | 52.4510 | C | 0 | 26.9690 | 68.9510 | 41.0260 | H | 0 | 9.1210  | 59.5210 | 48.5470 | C | 0 |



|         |         |         |   |   |         |         |         |   |   |         |         |         |   |   |
|---------|---------|---------|---|---|---------|---------|---------|---|---|---------|---------|---------|---|---|
| 8.9700  | 58.4670 | 48.7820 | H | 0 | 3.9980  | 53.8550 | 39.6700 | H | 0 | 4.8420  | 49.6080 | 52.0670 | H | 0 |
| 8.3370  | 60.2310 | 49.6730 | C | 0 | 2.7300  | 55.0600 | 40.7880 | C | 0 | 4.8710  | 51.6690 | 52.0230 | C | 0 |
| 8.1980  | 61.2350 | 49.2710 | H | 0 | 1.8330  | 54.5050 | 41.0620 | H | 0 | 5.6380  | 51.8370 | 52.7800 | H | 0 |
| 6.8660  | 59.7900 | 49.9240 | C | 0 | 2.5070  | 55.4850 | 39.8090 | H | 0 | 4.8750  | 52.5010 | 51.3180 | H | 0 |
| 6.2540  | 59.9970 | 49.0460 | H | 0 | 3.1950  | 56.1120 | 41.7850 | C | 0 | 3.4060  | 51.7300 | 52.5830 | C | 0 |
| 6.9660  | 58.7190 | 50.1030 | H | 0 | 2.7760  | 57.0710 | 41.4800 | H | 0 | 2.8150  | 51.9620 | 51.6970 | H | 0 |
| 6.3890  | 60.1780 | 50.8240 | H | 0 | 2.8330  | 55.7950 | 43.2020 | C | 0 | 3.0630  | 50.7950 | 53.0260 | H | 0 |
| 8.9720  | 60.3090 | 50.9200 | O | 0 | 2.6260  | 54.6290 | 43.6820 | O | 0 | 3.3530  | 52.7990 | 53.6760 | C | 0 |
| 9.8030  | 60.7840 | 50.8400 | H | 0 | 2.4060  | 56.7940 | 43.9050 | N | 0 | 3.9720  | 52.4010 | 54.4800 | H | 0 |
| 8.4400  | 59.8550 | 47.2060 | C | 0 | 2.6070  | 57.7140 | 43.5410 | H | 0 | 3.7590  | 53.7530 | 53.3390 | H | 0 |
| 7.5400  | 59.1190 | 46.8130 | O | 0 | 1.8710  | 56.7770 | 45.3190 | C | 0 | 2.0260  | 52.9510 | 54.2270 | N | 0 |
| 8.6280  | 61.0810 | 46.7090 | N | 0 | 1.3660  | 57.6890 | 45.6370 | H | 0 | 1.5300  | 52.0790 | 54.3480 | H | 0 |
| 9.1960  | 61.7410 | 47.2200 | H | 0 | 1.0090  | 56.1200 | 45.1980 | H | 0 | 2.0480  | 53.3760 | 55.1430 | H | 0 |
| 7.7130  | 61.6860 | 45.7430 | C | 0 | 2.8100  | 56.2040 | 46.3910 | C | 0 | 1.5080  | 53.5800 | 53.6300 | H | 0 |
| 6.7380  | 61.2350 | 45.9260 | H | 0 | 4.0330  | 56.3820 | 46.2690 | O | 0 | 6.7010  | 48.7900 | 50.2810 | C | 0 |
| 7.5340  | 63.2300 | 45.9390 | C | 0 | 2.3230  | 55.4760 | 47.3960 | N | 0 | 6.8240  | 47.9230 | 51.1390 | O | 0 |
| 8.5340  | 63.6570 | 45.8680 | H | 0 | 1.3160  | 55.4520 | 47.4670 | H | 0 | 6.9000  | 48.5790 | 48.9630 | N | 0 |
| 7.0170  | 63.6560 | 45.0800 | H | 0 | 3.1480  | 54.8510 | 48.4750 | C | 0 | 6.7660  | 49.3320 | 48.3030 | H | 0 |
| 6.8850  | 63.6060 | 47.2460 | C | 0 | 4.0220  | 55.4740 | 48.6620 | H | 0 | 7.2270  | 47.3160 | 48.3250 | C | 0 |
| 5.9580  | 63.0580 | 47.0770 | H | 0 | 2.3900  | 54.6510 | 49.7960 | C | 0 | 7.5630  | 46.5170 | 48.9860 | H | 0 |
| 7.3180  | 63.2200 | 48.1690 | H | 0 | 2.9980  | 54.0970 | 50.5120 | H | 0 | 6.0090  | 46.6460 | 47.6970 | C | 0 |
| 6.7270  | 65.1020 | 47.4330 | C | 0 | 2.2360  | 55.6660 | 50.1610 | H | 0 | 6.3270  | 45.7150 | 47.2260 | H | 0 |
| 6.2800  | 65.6010 | 46.5730 | H | 0 | 1.0400  | 53.9670 | 49.6460 | C | 0 | 5.3140  | 46.2880 | 48.4560 | H | 0 |
| 6.2010  | 65.3160 | 48.3640 | H | 0 | 0.4530  | 54.6720 | 49.0580 | H | 0 | 5.2650  | 47.4960 | 46.6250 | C | 0 |
| 8.1530  | 65.6340 | 47.6780 | C | 0 | 1.0060  | 52.9850 | 49.1750 | H | 0 | 5.8990  | 48.1270 | 46.0020 | H | 0 |
| 8.5960  | 65.0810 | 48.5070 | H | 0 | 0.2050  | 53.9470 | 51.0070 | C | 0 | 4.7300  | 46.4530 | 45.6700 | C | 0 |
| 8.7710  | 65.5780 | 46.7820 | H | 0 | -1.0220 | 53.7020 | 51.0420 | O | 0 | 4.1480  | 47.0380 | 44.9580 | H | 0 |
| 8.0340  | 67.0200 | 48.0360 | N | 0 | 0.7130  | 54.0620 | 52.1470 | O | 0 | 5.5420  | 46.0370 | 45.0740 | H | 0 |
| 7.6260  | 67.1540 | 48.9510 | H | 0 | 3.7310  | 53.4750 | 48.0270 | C | 0 | 4.1970  | 45.7180 | 46.2730 | H | 0 |
| 8.9860  | 67.3560 | 48.0480 | H | 0 | 3.9120  | 52.5410 | 48.7610 | O | 0 | 4.1420  | 48.3580 | 47.1960 | C | 0 |
| 7.5500  | 67.5990 | 47.3650 | H | 0 | 4.0510  | 53.3410 | 46.7180 | N | 0 | 3.2300  | 47.7720 | 47.3060 | H | 0 |
| 7.9470  | 61.3040 | 44.2720 | C | 0 | 4.0230  | 54.1440 | 46.1060 | H | 0 | 4.3640  | 48.8350 | 48.1500 | H | 0 |
| 7.0550  | 61.5080 | 43.4990 | O | 0 | 4.5610  | 52.1440 | 46.1420 | C | 0 | 3.9220  | 49.1100 | 46.4380 | H | 0 |
| 8.9880  | 60.5570 | 43.9780 | N | 0 | 4.0300  | 51.3200 | 46.6180 | H | 0 | 8.3790  | 47.4870 | 47.2670 | C | 0 |
| 9.7070  | 60.3260 | 44.6480 | H | 0 | 4.3800  | 52.0350 | 44.6350 | C | 0 | 8.6840  | 46.5810 | 46.5420 | O | 0 |
| 9.3070  | 60.0650 | 42.6100 | C | 0 | 3.3210  | 51.8200 | 44.4890 | H | 0 | 8.8960  | 48.6660 | 47.2710 | N | 0 |
| 8.8470  | 60.7710 | 41.9180 | H | 0 | 4.6120  | 53.0300 | 44.2550 | H | 0 | 8.6430  | 49.2440 | 48.0590 | H | 0 |
| 10.8070 | 60.1750 | 42.4670 | C | 0 | 5.0850  | 50.8600 | 43.9040 | C | 0 | 9.7020  | 49.3290 | 46.2090 | C | 0 |
| 11.0040 | 59.7850 | 41.4680 | H | 0 | 6.1030  | 51.1590 | 43.6540 | H | 0 | 9.1860  | 49.3270 | 45.2480 | H | 0 |
| 11.3760 | 61.5580 | 42.5160 | C | 0 | 4.9500  | 49.9690 | 44.5160 | H | 0 | 9.7370  | 50.3750 | 46.5150 | H | 0 |
| 11.2580 | 62.1460 | 43.4270 | H | 0 | 4.4230  | 50.4940 | 42.5570 | C | 0 | 11.1450 | 48.7900 | 45.9350 | C | 0 |
| 12.4430 | 61.4880 | 42.3060 | H | 0 | 3.4090  | 50.9050 | 42.1280 | O | 0 | 12.0450 | 49.5700 | 45.5930 | O | 0 |
| 10.7990 | 61.9650 | 41.6860 | H | 0 | 5.2640  | 49.7790 | 41.7380 | N | 0 | 11.4350 | 47.4790 | 46.1650 | N | 0 |
| 11.5130 | 59.3880 | 43.3650 | O | 0 | 4.8430  | 49.5890 | 40.8390 | H | 0 | 10.7320 | 46.8600 | 46.5420 | H | 0 |
| 11.5310 | 59.8750 | 44.1920 | H | 0 | 6.0790  | 49.3030 | 42.0980 | H | 0 | 12.7780 | 46.9370 | 45.9240 | C | 0 |
| 8.7140  | 58.6200 | 42.2220 | C | 0 | 5.9880  | 51.8070 | 46.6460 | C | 0 | 12.8610 | 45.8650 | 46.0990 | H | 0 |
| 9.4390  | 57.8970 | 41.5510 | O | 0 | 6.4530  | 50.6590 | 46.6730 | O | 0 | 13.1680 | 47.1480 | 44.9280 | H | 0 |
| 7.4830  | 58.3520 | 42.5740 | N | 0 | 6.6840  | 52.7860 | 47.1910 | N | 0 | 13.8650 | 47.4820 | 46.8340 | C | 0 |
| 6.9650  | 59.1550 | 42.9010 | H | 0 | 6.2980  | 53.7070 | 47.3400 | H | 0 | 13.7150 | 47.4640 | 48.0220 | O | 0 |
| 6.8040  | 57.0360 | 42.6180 | C | 0 | 7.9260  | 52.4720 | 47.9030 | C | 0 | 14.9820 | 47.8310 | 46.1520 | N | 0 |
| 7.2780  | 56.3750 | 41.8920 | H | 0 | 8.6560  | 52.1490 | 47.1600 | H | 0 | 14.9520 | 47.7180 | 45.1490 | H | 0 |
| 6.9180  | 56.4650 | 44.0430 | C | 0 | 8.4570  | 53.8650 | 48.4810 | C | 0 | 16.2310 | 48.4210 | 46.6380 | C | 0 |
| 6.5600  | 57.3010 | 44.6440 | H | 0 | 9.2510  | 53.5980 | 49.1790 | H | 0 | 16.8990 | 48.4260 | 45.7770 | H | 0 |
| 6.3870  | 55.5270 | 44.2060 | H | 0 | 8.8430  | 54.5790 | 47.7530 | H | 0 | 15.8720 | 49.3830 | 47.0040 | H | 0 |
| 8.3270  | 56.0490 | 44.5120 | C | 0 | 7.5270  | 54.7160 | 49.2760 | C | 0 | 17.1540 | 47.6510 | 47.6740 | C | 0 |
| 9.2220  | 56.7420 | 45.2440 | C | 0 | 7.0080  | 55.8990 | 48.8030 | C | 0 | 17.7630 | 48.2710 | 48.5350 | O | 0 |
| 9.0940  | 57.7090 | 45.7080 | H | 0 | 7.1020  | 56.2470 | 47.7850 | H | 0 | 17.2410 | 46.3500 | 47.5670 | N | 0 |
| 10.3040 | 55.9080 | 45.4920 | N | 0 | 6.1510  | 56.3730 | 49.7990 | N | 0 | 16.7700 | 45.9200 | 46.7830 | H | 0 |
| 11.0500 | 56.1710 | 46.1210 | H | 0 | 5.5220  | 57.1310 | 49.5800 | H | 0 | 17.9060 | 45.3670 | 48.4000 | C | 0 |
| 10.1490 | 54.6390 | 44.9710 | C | 0 | 6.1780  | 55.7050 | 50.9690 | C | 0 | 17.4060 | 45.3850 | 49.3680 | H | 0 |
| 10.9580 | 53.4700 | 44.8610 | C | 0 | 5.4660  | 55.8190 | 52.1410 | C | 0 | 17.7360 | 43.9420 | 47.7770 | C | 0 |
| 11.8900 | 53.3840 | 45.4010 | H | 0 | 4.7180  | 56.5800 | 52.3030 | H | 0 | 18.2770 | 43.9220 | 46.8310 | H | 0 |
| 10.5460 | 52.3420 | 44.1550 | C | 0 | 5.8380  | 55.0610 | 53.2210 | C | 0 | 18.2140 | 42.7600 | 48.5760 | C | 0 |
| 11.2930 | 51.5620 | 44.1340 | H | 0 | 5.3300  | 55.1220 | 54.1720 | H | 0 | 17.9280 | 42.8250 | 49.6260 | H | 0 |
| 9.3060  | 52.3670 | 43.4980 | C | 0 | 6.9750  | 54.2100 | 53.1270 | C | 0 | 17.8040 | 41.8800 | 48.0800 | H | 0 |
| 9.0400  | 51.5050 | 42.9030 | H | 0 | 7.2080  | 53.5650 | 53.9610 | H | 0 | 19.2840 | 42.5940 | 48.4540 | H | 0 |
| 8.5250  | 53.5130 | 43.4650 | C | 0 | 7.5480  | 54.0420 | 51.8550 | C | 0 | 16.3330 | 43.7080 | 47.4230 | O | 0 |
| 7.5770  | 53.5800 | 42.9520 | H | 0 | 8.5140  | 53.5710 | 51.7390 | H | 0 | 16.1760 | 43.4140 | 46.5230 | H | 0 |
| 8.8920  | 54.6770 | 44.2460 | C | 0 | 7.1280  | 54.7220 | 50.7410 | C | 0 | 19.4150 | 45.6530 | 48.4610 | C | 0 |
| 5.2920  | 57.1850 | 42.3260 | C | 0 | 7.8750  | 51.4160 | 48.9940 | C | 0 | 20.0090 | 46.3940 | 47.6760 | O | 0 |
| 4.8440  | 58.2890 | 42.6600 | O | 0 | 8.8920  | 50.7310 | 49.2200 | O | 0 | 20.0120 | 45.2200 | 49.5910 | N | 0 |
| 4.5910  | 56.1930 | 41.7970 | N | 0 | 6.7040  | 51.2490 | 49.5650 | N | 0 | 19.5260 | 44.5810 | 50.2040 | H | 0 |
| 5.1730  | 54.9520 | 41.2800 | C | 0 | 5.9030  | 51.8160 | 49.3270 | H | 0 | 21.2680 | 45.8780 | 50.1260 | C | 0 |
| 5.6020  | 54.3980 | 42.1150 | H | 0 | 6.4680  | 50.2630 | 50.6720 | C | 0 | 21.6370 | 46.5910 | 49.3890 | H | 0 |
| 5.8880  | 55.1140 | 40.4730 | H | 0 | 7.1350  | 50.4730 | 51.5090 | H | 0 | 20.9770 | 46.7620 | 51.3410 | C | 0 |
| 3.8970  | 54.1220 | 40.7220 | C | 0 | 5.0730  | 50.3680 | 51.3210 | C | 0 | 21.9020 | 47.1930 | 51.7250 | H | 0 |
| 3.7170  | 53.1880 | 41.2540 | H | 0 | 4.3760  | 50.2080 | 50.4980 | H | 0 | 19.9890 | 47.8660 | 50.9450 | C | 0 |

|         |         |         |   |   |         |         |         |   |   |         |         |         |   |   |
|---------|---------|---------|---|---|---------|---------|---------|---|---|---------|---------|---------|---|---|
| 19.0220 | 47.4340 | 50.6880 | H | 0 | 28.0660 | 43.9240 | 54.0030 | C | 0 | 35.8990 | 60.7550 | 58.0810 | H | 0 |
| 19.7120 | 48.4750 | 51.8060 | H | 0 | 28.7390 | 43.2460 | 54.5070 | H | 0 | 35.1620 | 59.4200 | 56.5840 | C | 0 |
| 20.3880 | 48.4420 | 50.1100 | H | 0 | 28.5630 | 45.1470 | 53.5200 | C | 0 | 35.1620 | 58.3650 | 56.3120 | H | 0 |
| 20.3110 | 45.8770 | 52.2350 | O | 0 | 29.5980 | 45.3930 | 53.7090 | H | 0 | 34.2150 | 59.9390 | 56.4400 | H | 0 |
| 20.0000 | 46.3090 | 53.0340 | H | 0 | 30.8750 | 47.6050 | 52.1220 | C | 0 | 36.0380 | 60.1940 | 55.5870 | C | 0 |
| 22.4200 | 44.9180 | 50.4510 | C | 0 | 31.6450 | 46.6430 | 52.3160 | O | 0 | 37.0520 | 59.8310 | 55.7550 | H | 0 |
| 23.3080 | 45.2950 | 51.2440 | O | 0 | 31.1480 | 48.8380 | 52.5130 | N | 0 | 35.6580 | 59.9130 | 54.1320 | C | 0 |
| 22.4160 | 43.6710 | 49.9530 | N | 0 | 30.4780 | 49.5890 | 52.4240 | H | 0 | 36.3410 | 60.5150 | 53.5310 | H | 0 |
| 21.6990 | 43.3120 | 49.3390 | H | 0 | 32.4490 | 49.1870 | 53.1060 | C | 0 | 35.6950 | 58.8340 | 53.9860 | H | 0 |
| 23.6350 | 42.8810 | 49.8270 | C | 0 | 32.9020 | 48.2870 | 53.5220 | H | 0 | 34.6270 | 60.2390 | 53.9980 | H | 0 |
| 24.2320 | 43.0480 | 50.7230 | H | 0 | 33.3580 | 49.7410 | 52.0200 | C | 0 | 36.0720 | 61.7150 | 55.7680 | C | 0 |
| 23.3860 | 41.3520 | 49.8140 | C | 0 | 34.2250 | 50.1350 | 52.5480 | H | 0 | 36.5930 | 62.2350 | 54.9640 | H | 0 |
| 23.0630 | 41.0750 | 50.8180 | H | 0 | 33.9000 | 48.9690 | 51.4740 | H | 0 | 35.0430 | 62.0760 | 55.7850 | H | 0 |
| 22.5470 | 41.2000 | 49.1360 | H | 0 | 32.9350 | 50.7810 | 51.2030 | O | 0 | 36.3790 | 61.9630 | 56.7840 | H | 0 |
| 24.4080 | 40.4730 | 49.4510 | C | 0 | 33.1390 | 50.6580 | 50.2730 | H | 0 | 34.4730 | 59.3400 | 58.9950 | C | 0 |
| 24.3480 | 39.6660 | 48.3100 | C | 0 | 32.3220 | 50.2480 | 54.2080 | C | 0 | 33.5140 | 60.0880 | 59.1970 | O | 0 |
| 23.5110 | 39.5960 | 47.6310 | H | 0 | 31.2600 | 50.9570 | 54.3740 | O | 0 | 34.5600 | 58.1270 | 59.5960 | N | 0 |
| 25.6220 | 39.3440 | 47.9990 | N | 0 | 33.4600 | 50.4490 | 54.9210 | N | 0 | 35.2700 | 57.4760 | 59.2930 | H | 0 |
| 25.8650 | 38.8550 | 47.1490 | H | 0 | 34.2060 | 49.8520 | 54.5940 | H | 0 | 33.5330 | 57.4790 | 60.3430 | C | 0 |
| 26.5370 | 39.8880 | 48.8840 | C | 0 | 33.6330 | 51.4380 | 56.0000 | C | 0 | 33.9180 | 56.4660 | 60.4500 | H | 0 |
| 27.9410 | 39.8700 | 48.9340 | C | 0 | 32.9600 | 52.2830 | 55.8560 | H | 0 | 33.3600 | 57.9770 | 61.7390 | C | 0 |
| 28.4530 | 39.5540 | 48.0370 | H | 0 | 33.3760 | 50.7240 | 57.3190 | C | 0 | 34.3050 | 57.9600 | 62.2830 | H | 0 |
| 28.5910 | 40.3760 | 50.0350 | C | 0 | 32.3270 | 50.4270 | 57.3280 | H | 0 | 33.1630 | 59.0420 | 61.6220 | H | 0 |
| 29.6660 | 40.3540 | 50.1400 | H | 0 | 34.0220 | 49.8510 | 57.4070 | H | 0 | 32.3730 | 57.3210 | 62.7040 | C | 0 |
| 27.8160 | 40.9560 | 51.0500 | C | 0 | 33.4890 | 51.6530 | 58.5040 | C | 0 | 31.8530 | 58.0150 | 63.6160 | O | 0 |
| 28.3300 | 41.4130 | 51.8830 | H | 0 | 32.6060 | 52.7230 | 58.7370 | C | 0 | 32.1690 | 56.0840 | 62.5260 | O | 0 |
| 26.3920 | 40.8990 | 51.0660 | C | 0 | 31.7740 | 52.8800 | 58.0670 | H | 0 | 32.2310 | 57.4390 | 59.4950 | C | 0 |
| 25.8220 | 41.1470 | 51.9490 | H | 0 | 32.6780 | 53.5510 | 59.8960 | C | 0 | 31.2140 | 58.0070 | 59.8330 | O | 0 |
| 25.7680 | 40.3810 | 49.9550 | C | 0 | 31.9410 | 54.3350 | 59.9800 | H | 0 | 32.3100 | 56.8400 | 58.3070 | N | 0 |
| 24.5350 | 43.2960 | 48.7050 | C | 0 | 33.5530 | 53.2920 | 60.8740 | C | 0 | 33.2050 | 56.3990 | 58.1510 | H | 0 |
| 24.0710 | 43.3580 | 47.5760 | O | 0 | 33.5430 | 54.0960 | 61.9530 | O | 0 | 31.2440 | 56.7140 | 57.2850 | C | 0 |
| 25.7760 | 43.5200 | 49.0240 | N | 0 | 32.9970 | 54.8800 | 61.8610 | H | 0 | 30.3640 | 56.7830 | 57.9250 | H | 0 |
| 26.0740 | 43.4530 | 49.9870 | H | 0 | 34.4850 | 52.1610 | 60.7120 | C | 0 | 31.3200 | 57.8690 | 56.2650 | C | 0 |
| 26.9510 | 43.6500 | 48.1870 | C | 0 | 35.0060 | 51.8100 | 61.5910 | H | 0 | 32.3180 | 57.8130 | 55.8320 | H | 0 |
| 27.0440 | 42.7910 | 47.5210 | H | 0 | 34.3500 | 51.2740 | 59.5930 | C | 0 | 30.5880 | 57.6910 | 55.4770 | H | 0 |
| 26.7640 | 44.5940 | 47.6750 | H | 0 | 34.9920 | 50.4070 | 59.5370 | H | 0 | 31.0320 | 59.3250 | 56.6910 | C | 0 |
| 28.1640 | 43.8320 | 49.1030 | C | 0 | 35.0640 | 52.1010 | 56.1250 | C | 0 | 31.8210 | 59.5630 | 57.4050 | H | 0 |
| 28.0150 | 43.8340 | 50.3120 | O | 0 | 36.0350 | 51.3780 | 56.1910 | O | 0 | 31.2710 | 60.2160 | 55.3940 | C | 0 |
| 29.4260 | 44.0240 | 48.5960 | N | 0 | 35.1770 | 53.4440 | 56.2820 | N | 0 | 30.4420 | 59.9550 | 54.7370 | H | 0 |
| 29.5790 | 43.9590 | 47.6000 | H | 0 | 34.3460 | 54.0010 | 56.1380 | H | 0 | 31.1610 | 61.2760 | 55.6250 | H | 0 |
| 30.5800 | 44.3820 | 49.4510 | C | 0 | 36.4220 | 54.2230 | 56.6350 | C | 0 | 32.2080 | 60.0270 | 54.8700 | H | 0 |
| 30.5030 | 43.9740 | 50.4580 | H | 0 | 37.3020 | 53.5800 | 56.6480 | H | 0 | 29.6090 | 59.5670 | 57.2260 | C | 0 |
| 31.9270 | 44.0000 | 48.7260 | C | 0 | 36.8130 | 55.2380 | 55.4890 | C | 0 | 29.3830 | 59.3220 | 58.2630 | H | 0 |
| 31.9300 | 44.5640 | 47.7930 | H | 0 | 37.2260 | 54.6250 | 54.6880 | H | 0 | 29.4370 | 60.6340 | 57.0810 | H | 0 |
| 32.8290 | 44.3850 | 49.2020 | H | 0 | 35.9780 | 55.8590 | 55.1630 | H | 0 | 28.8190 | 59.1630 | 56.5930 | H | 0 |
| 31.9590 | 42.5110 | 48.4740 | C | 0 | 37.8370 | 56.2720 | 55.8270 | C | 0 | 31.2170 | 55.4180 | 56.6190 | C | 0 |
| 31.6800 | 41.8850 | 47.2690 | C | 0 | 38.0500 | 57.1310 | 54.9900 | O | 0 | 32.2490 | 54.8110 | 56.4120 | O | 0 |
| 31.5310 | 42.5250 | 46.4110 | H | 0 | 38.6320 | 56.0340 | 56.7270 | O | 0 | 30.0110 | 54.9170 | 56.2960 | N | 0 |
| 31.8200 | 40.5750 | 47.2940 | N | 0 | 36.1920 | 54.9680 | 58.0190 | C | 0 | 29.2120 | 55.5040 | 56.4880 | H | 0 |
| 31.8060 | 39.9900 | 46.4710 | H | 0 | 35.2710 | 55.7580 | 58.1820 | O | 0 | 29.7910 | 53.5820 | 55.7820 | C | 0 |
| 32.0540 | 40.1250 | 48.5900 | C | 0 | 36.9510 | 54.5880 | 59.1100 | N | 0 | 30.7200 | 53.1900 | 55.3680 | H | 0 |
| 32.1740 | 38.8520 | 49.1620 | C | 0 | 37.9090 | 53.5180 | 59.1080 | C | 0 | 29.1010 | 52.7170 | 56.8850 | C | 0 |
| 31.9770 | 37.8960 | 48.7010 | H | 0 | 38.6400 | 53.4910 | 58.2990 | H | 0 | 29.3040 | 51.6600 | 56.7170 | H | 0 |
| 32.3530 | 38.7780 | 50.5930 | C | 0 | 37.3330 | 52.5930 | 59.0840 | H | 0 | 29.5530 | 52.8600 | 57.8670 | H | 0 |
| 32.4080 | 37.8300 | 51.1060 | H | 0 | 38.7140 | 53.5310 | 60.4210 | C | 0 | 27.5850 | 52.8800 | 57.1100 | C | 0 |
| 32.4760 | 39.9400 | 51.3420 | C | 0 | 39.5170 | 54.2640 | 60.3430 | H | 0 | 27.2700 | 53.7210 | 58.1720 | C | 0 |
| 32.5880 | 39.8640 | 52.4140 | H | 0 | 39.1250 | 52.5680 | 60.7250 | H | 0 | 28.0070 | 54.2730 | 58.7360 | H | 0 |
| 32.4120 | 41.1880 | 50.7030 | C | 0 | 37.6810 | 54.1090 | 61.3490 | C | 0 | 25.9210 | 53.8850 | 58.4970 | C | 0 |
| 32.4830 | 42.0450 | 51.3560 | H | 0 | 38.2080 | 54.4400 | 62.2440 | H | 0 | 25.5410 | 54.5480 | 59.2610 | H | 0 |
| 32.2130 | 41.3440 | 49.3310 | C | 0 | 36.9160 | 53.3710 | 61.5860 | H | 0 | 24.9180 | 53.1490 | 57.8290 | C | 0 |
| 30.4380 | 45.8200 | 49.8710 | C | 0 | 36.9660 | 55.1480 | 60.4560 | C | 0 | 23.8630 | 53.2490 | 58.0370 | H | 0 |
| 31.1520 | 46.7090 | 49.3640 | O | 0 | 35.9170 | 55.2160 | 60.7460 | H | 0 | 25.2980 | 52.3470 | 56.7440 | C | 0 |
| 29.5620 | 46.1140 | 50.8390 | N | 0 | 37.4970 | 56.6030 | 60.5490 | C | 0 | 24.5600 | 51.7050 | 56.2870 | H | 0 |
| 29.0310 | 45.3510 | 51.2360 | H | 0 | 37.1210 | 57.3530 | 61.4470 | O | 0 | 26.6220 | 52.1240 | 56.4070 | C | 0 |
| 29.5000 | 47.4060 | 51.5060 | C | 0 | 38.4190 | 56.9140 | 59.6360 | N | 0 | 27.0220 | 51.3460 | 55.7740 | H | 0 |
| 29.4000 | 48.2040 | 50.7710 | H | 0 | 38.5440 | 56.2640 | 58.8730 | H | 0 | 28.8720 | 53.6460 | 54.4930 | C | 0 |
| 28.2540 | 47.4550 | 52.4280 | C | 0 | 38.9210 | 58.2120 | 59.5610 | C | 0 | 27.9360 | 54.4750 | 54.3670 | O | 0 |
| 28.4380 | 48.1110 | 53.2790 | H | 0 | 39.2710 | 58.5000 | 60.5530 | H | 0 | 29.0670 | 52.6810 | 53.5980 | N | 0 |
| 27.5360 | 47.9290 | 51.7590 | H | 0 | 40.0460 | 58.2750 | 58.5890 | C | 0 | 29.8080 | 52.0080 | 53.7340 | H | 0 |
| 27.7250 | 46.1200 | 52.9610 | C | 0 | 40.4380 | 59.2860 | 58.4790 | H | 0 | 28.6000 | 52.9030 | 52.2040 | C | 0 |
| 26.3390 | 45.9070 | 52.8130 | C | 0 | 40.8700 | 57.5720 | 58.7140 | H | 0 | 27.6910 | 53.5040 | 52.2340 | H | 0 |
| 25.6930 | 46.6370 | 52.3490 | H | 0 | 39.6070 | 58.1350 | 57.6020 | H | 0 | 29.6060 | 53.4800 | 51.2780 | C | 0 |
| 25.8820 | 44.6710 | 53.2070 | C | 0 | 37.8280 | 59.2470 | 59.1090 | C | 0 | 30.4020 | 52.8010 | 50.9740 | H | 0 |
| 24.8770 | 44.4210 | 52.9020 | H | 0 | 37.8080 | 60.3620 | 59.6280 | O | 0 | 29.0320 | 53.8750 | 50.4400 | H | 0 |
| 26.6880 | 43.6030 | 53.8130 | C | 0 | 36.8240 | 58.8680 | 58.3760 | N | 0 | 30.4660 | 54.6210 | 51.7910 | C | 0 |
| 26.2620 | 42.3800 | 54.2200 | O | 0 | 36.9090 | 57.9920 | 57.8810 | H | 0 | 31.6270 | 54.3580 | 52.5380 | C | 0 |
| 26.9660 | 41.7500 | 54.3900 | H | 0 | 35.6410 | 59.6980 | 58.0100 | C | 0 | 31.8610 | 53.3640 | 52.8890 | H | 0 |

|         |         |         |   |   |         |         |         |   |   |         |         |         |   |   |
|---------|---------|---------|---|---|---------|---------|---------|---|---|---------|---------|---------|---|---|
| 32.3770 | 55.4390 | 53.0030 | C | 0 | 14.6010 | 47.5070 | 42.9790 | O | 0 | 8.9140  | 50.5000 | 35.2700 | H | 0 |
| 33.2930 | 55.2890 | 53.5560 | H | 0 | 13.8970 | 49.0690 | 41.5820 | N | 0 | 9.8090  | 50.7920 | 33.2310 | C | 0 |
| 32.0560 | 56.7810 | 52.5330 | C | 0 | 13.9980 | 49.7280 | 40.2160 | C | 0 | 9.4340  | 50.9650 | 32.2220 | H | 0 |
| 32.8440 | 57.8120 | 52.8590 | O | 0 | 14.0540 | 49.0360 | 39.3760 | H | 0 | 10.1360 | 51.7990 | 33.4910 | H | 0 |
| 32.4880 | 58.6810 | 52.6600 | H | 0 | 14.8290 | 50.4340 | 40.2340 | H | 0 | 10.5880 | 50.0600 | 33.4450 | H | 0 |
| 30.9110 | 57.0340 | 51.7970 | C | 0 | 12.6660 | 50.5410 | 40.1430 | C | 0 | 7.4320  | 51.3220 | 33.9460 | C | 0 |
| 30.5960 | 58.0260 | 51.5080 | H | 0 | 11.9460 | 49.8400 | 39.7190 | H | 0 | 7.2880  | 52.3850 | 34.5880 | O | 0 |
| 30.0830 | 55.9560 | 51.4510 | C | 0 | 12.7360 | 51.4780 | 39.5900 | H | 0 | 6.4960  | 50.8790 | 33.1640 | N | 0 |
| 29.1160 | 56.1130 | 50.9980 | H | 0 | 12.3050 | 50.8280 | 41.5860 | C | 0 | 6.5990  | 50.0160 | 32.6500 | H | 0 |
| 28.0200 | 51.5730 | 51.7360 | C | 0 | 11.2300 | 50.9480 | 41.7210 | H | 0 | 5.2250  | 51.5740 | 33.0060 | C | 0 |
| 28.5870 | 50.5190 | 51.9450 | O | 0 | 12.8770 | 51.6620 | 41.9940 | H | 0 | 5.4230  | 52.6340 | 32.8470 | H | 0 |
| 26.9710 | 51.6930 | 50.9390 | N | 0 | 12.7050 | 49.4550 | 42.2480 | C | 0 | 4.6310  | 50.9710 | 31.7200 | C | 0 |
| 26.4920 | 52.5730 | 50.8090 | H | 0 | 13.0310 | 49.7740 | 43.2380 | H | 0 | 5.1180  | 51.4550 | 30.8740 | H | 0 |
| 26.3120 | 50.6220 | 50.2460 | C | 0 | 11.6240 | 48.4100 | 42.3960 | C | 0 | 4.6430  | 49.8840 | 31.8030 | H | 0 |
| 27.0310 | 49.8400 | 50.0030 | H | 0 | 10.4390 | 48.7560 | 42.5300 | O | 0 | 3.0760  | 51.4060 | 31.6300 | C | 0 |
| 25.2890 | 49.9410 | 51.2650 | C | 0 | 11.9140 | 47.0860 | 42.3070 | N | 0 | 2.4970  | 50.8990 | 30.8580 | H | 0 |
| 24.8360 | 49.1040 | 50.7330 | H | 0 | 12.8810 | 46.8260 | 42.1750 | H | 0 | 2.5240  | 51.0570 | 32.5020 | H | 0 |
| 25.9020 | 49.6940 | 52.1320 | H | 0 | 10.8730 | 46.0700 | 42.4180 | C | 0 | 2.8090  | 52.9020 | 31.3560 | C | 0 |
| 24.1040 | 50.7740 | 51.6440 | C | 0 | 11.0110 | 45.2850 | 43.1610 | H | 0 | 1.6290  | 53.3000 | 31.5790 | O | 0 |
| 24.1280 | 51.3850 | 52.9060 | C | 0 | 9.9470  | 46.5940 | 42.6550 | H | 0 | 3.7290  | 53.6460 | 30.9590 | O | 0 |
| 25.0060 | 51.3650 | 53.5350 | H | 0 | 10.6790 | 45.4290 | 40.9780 | C | 0 | 4.3910  | 51.4760 | 34.3610 | C | 0 |
| 22.9200 | 52.0290 | 53.4040 | C | 0 | 11.5550 | 45.0040 | 40.3780 | O | 0 | 3.8400  | 52.4650 | 34.7480 | O | 0 |
| 23.0080 | 52.3240 | 54.4400 | H | 0 | 9.4930  | 45.3950 | 40.4640 | N | 0 | 4.4670  | 50.2900 | 35.0090 | N | 0 |
| 21.8040 | 52.0880 | 52.6330 | C | 0 | 8.8210  | 45.8630 | 41.0540 | H | 0 | 4.9880  | 49.5390 | 34.5800 | H | 0 |
| 20.6910 | 52.7000 | 53.0050 | O | 0 | 9.1550  | 44.7950 | 39.1410 | C | 0 | 3.7150  | 50.0190 | 36.1630 | C | 0 |
| 20.0010 | 52.0400 | 52.9070 | H | 0 | 9.3020  | 43.7190 | 39.2380 | H | 0 | 2.7190  | 50.3750 | 35.8990 | H | 0 |
| 21.7320 | 51.4810 | 51.3460 | C | 0 | 7.6620  | 44.9650 | 38.8590 | C | 0 | 3.7980  | 48.5110 | 36.5510 | C | 0 |
| 20.8760 | 51.5480 | 50.6900 | H | 0 | 7.0430  | 44.6690 | 39.7070 | H | 0 | 3.9030  | 47.8510 | 35.6900 | H | 0 |
| 22.9070 | 50.9080 | 50.8600 | C | 0 | 7.2540  | 46.4070 | 38.5540 | C | 0 | 4.6790  | 48.3270 | 37.1660 | H | 0 |
| 22.8800 | 50.5820 | 49.8310 | H | 0 | 7.2650  | 46.9830 | 39.4800 | H | 0 | 2.4630  | 48.1580 | 37.2100 | C | 0 |
| 25.6070 | 51.2050 | 48.9860 | C | 0 | 7.8940  | 46.7070 | 37.7240 | H | 0 | 1.7130  | 48.9050 | 36.9500 | H | 0 |
| 25.3250 | 52.4260 | 48.8600 | O | 0 | 6.2190  | 46.3870 | 38.2150 | H | 0 | 2.1520  | 47.1710 | 36.8670 | H | 0 |
| 25.2080 | 50.2770 | 48.1220 | N | 0 | 7.2660  | 44.2980 | 37.6630 | O | 0 | 2.4820  | 48.1420 | 38.7300 | C | 0 |
| 25.4350 | 49.3410 | 48.4240 | H | 0 | 6.3700  | 43.9580 | 37.7160 | H | 0 | 3.3320  | 48.7120 | 39.3910 | O | 0 |
| 24.2180 | 50.4980 | 47.0790 | C | 0 | 10.0400 | 45.3110 | 37.9290 | C | 0 | 1.4570  | 47.7890 | 39.4130 | N | 0 |
| 23.9320 | 51.5490 | 47.0200 | H | 0 | 10.3860 | 46.4600 | 37.7950 | O | 0 | 1.4920  | 47.8120 | 40.4220 | H | 0 |
| 24.5230 | 50.2000 | 46.0750 | H | 0 | 10.3720 | 44.4520 | 36.9380 | N | 0 | 0.6590  | 47.2830 | 39.0550 | H | 0 |
| 22.9210 | 49.7780 | 47.3190 | C | 0 | 9.9450  | 43.5370 | 36.9340 | H | 0 | 4.1700  | 51.0560 | 37.2750 | C | 0 |
| 22.8480 | 48.9190 | 48.1880 | O | 0 | 10.9310 | 44.7660 | 35.6360 | C | 0 | 3.4250  | 51.6320 | 38.0390 | O | 0 |
| 22.0110 | 49.9840 | 46.3820 | N | 0 | 11.8240 | 45.3570 | 35.8420 | H | 0 | 5.5520  | 51.2120 | 37.2650 | N | 0 |
| 22.3590 | 50.6450 | 45.7020 | H | 0 | 11.1800 | 43.5410 | 34.8090 | C | 0 | 6.0900  | 50.7200 | 36.5650 | H | 0 |
| 20.6330 | 49.4670 | 46.3430 | C | 0 | 10.2500 | 43.0870 | 34.4650 | H | 0 | 6.2970  | 52.2480 | 38.1750 | C | 0 |
| 20.4230 | 48.6890 | 47.0780 | H | 0 | 11.6650 | 43.8480 | 33.8830 | H | 0 | 5.7360  | 52.2560 | 39.1100 | H | 0 |
| 19.6760 | 50.6450 | 46.6200 | C | 0 | 11.9680 | 42.3420 | 35.5030 | C | 0 | 7.6060  | 51.6400 | 38.5380 | C | 0 |
| 18.6270 | 50.3490 | 46.6450 | H | 0 | 12.5550 | 42.3430 | 36.7100 | C | 0 | 8.2130  | 51.5540 | 37.6370 | H | 0 |
| 20.0420 | 51.2370 | 48.0180 | C | 0 | 12.6410 | 43.1790 | 37.3880 | H | 0 | 8.0930  | 52.3010 | 39.2550 | H | 0 |
| 19.2500 | 51.9640 | 48.1960 | H | 0 | 13.1530 | 41.1280 | 36.9770 | N | 0 | 7.6170  | 50.2810 | 39.1440 | C | 0 |
| 20.0930 | 50.4460 | 48.7670 | H | 0 | 13.7760 | 41.0150 | 37.7640 | H | 0 | 7.0730  | 50.4470 | 40.0740 | H | 0 |
| 20.9580 | 51.8230 | 47.9460 | H | 0 | 12.7110 | 40.2300 | 36.0330 | C | 0 | 7.1170  | 49.5720 | 38.4850 | H | 0 |
| 19.7190 | 51.6100 | 45.7210 | O | 0 | 12.8640 | 38.8750 | 35.8790 | C | 0 | 9.0650  | 49.7250 | 39.4940 | C | 0 |
| 19.1940 | 52.3100 | 46.1170 | H | 0 | 13.1210 | 38.3240 | 36.7720 | H | 0 | 9.6080  | 50.4610 | 40.0870 | H | 0 |
| 20.2430 | 48.8420 | 44.9850 | C | 0 | 12.5090 | 38.2510 | 34.6680 | C | 0 | 9.0040  | 48.7580 | 39.9940 | H | 0 |
| 20.6580 | 49.2600 | 43.8910 | O | 0 | 12.5660 | 37.1740 | 34.6030 | H | 0 | 9.7920  | 49.2940 | 38.2820 | N | 0 |
| 19.4660 | 47.7430 | 45.0200 | N | 0 | 12.0560 | 39.0300 | 33.5690 | C | 0 | 9.8200  | 48.2860 | 38.2140 | H | 0 |
| 19.3150 | 47.4040 | 45.9600 | H | 0 | 11.8690 | 38.5900 | 32.6010 | H | 0 | 10.5160 | 49.8640 | 37.4040 | C | 0 |
| 18.7410 | 47.0520 | 43.8930 | C | 0 | 11.8430 | 40.3690 | 33.7640 | C | 0 | 10.9530 | 51.0760 | 37.4920 | N | 0 |
| 19.5520 | 46.7600 | 43.2260 | H | 0 | 11.4110 | 40.9040 | 32.9320 | H | 0 | 10.7740 | 51.6550 | 38.3010 | H | 0 |
| 18.2250 | 45.6610 | 44.4060 | C | 0 | 12.1310 | 41.0250 | 35.0060 | C | 0 | 11.5980 | 51.3700 | 36.7730 | H | 0 |
| 18.3150 | 45.0470 | 43.5100 | H | 0 | 10.0200 | 45.7210 | 34.7980 | C | 0 | 11.0890 | 49.1180 | 36.5190 | N | 0 |
| 18.9200 | 45.2930 | 45.1610 | H | 0 | 10.6250 | 46.4360 | 33.9720 | O | 0 | 11.0670 | 48.1150 | 36.6330 | H | 0 |
| 16.8310 | 45.6360 | 44.8010 | O | 0 | 8.6810  | 45.6720 | 34.9240 | N | 0 | 11.6940 | 49.5530 | 35.8370 | H | 0 |
| 16.5820 | 44.7110 | 44.7320 | H | 0 | 8.2940  | 44.9160 | 35.4710 | H | 0 | 6.4160  | 53.7170 | 37.7240 | C | 0 |
| 17.7420 | 47.9360 | 43.0510 | C | 0 | 7.8020  | 46.6170 | 34.2320 | C | 0 | 7.2400  | 54.4850 | 38.2880 | O | 0 |
| 17.3570 | 49.0550 | 43.5030 | O | 0 | 8.0450  | 46.6040 | 33.1700 | H | 0 | 5.7000  | 54.0700 | 36.6370 | N | 0 |
| 17.1600 | 47.4320 | 41.9050 | N | 0 | 6.2590  | 46.1800 | 34.3870 | C | 0 | 5.1630  | 53.4150 | 36.0880 | H | 0 |
| 17.4130 | 46.4860 | 41.6570 | H | 0 | 6.0430  | 45.1250 | 34.2180 | H | 0 | 5.7290  | 55.4260 | 36.1250 | C | 0 |
| 16.1480 | 47.9940 | 41.1440 | C | 0 | 5.8890  | 46.3840 | 35.3920 | H | 0 | 6.7150  | 55.6670 | 35.7270 | H | 0 |
| 16.4180 | 49.0350 | 40.9660 | H | 0 | 5.3620  | 46.9540 | 33.4560 | C | 0 | 4.8290  | 55.5070 | 34.9370 | C | 0 |
| 16.1060 | 47.2740 | 39.8230 | C | 0 | 5.3190  | 48.1740 | 33.4440 | O | 0 | 5.1960  | 54.7770 | 34.2160 | H | 0 |
| 15.8770 | 47.9080 | 38.9660 | H | 0 | 4.6530  | 46.2370 | 32.6270 | N | 0 | 3.8120  | 55.2820 | 35.2590 | H | 0 |
| 17.0730 | 46.9220 | 39.4630 | H | 0 | 4.2720  | 46.6650 | 31.7950 | H | 0 | 4.8760  | 56.9700 | 34.3000 | C | 0 |
| 15.0420 | 46.1460 | 39.7820 | C | 0 | 4.8050  | 45.2410 | 32.5650 | H | 0 | 4.3590  | 57.6910 | 34.9320 | H | 0 |
| 15.0970 | 45.1760 | 40.5340 | O | 0 | 7.9750  | 48.0320 | 34.7130 | C | 0 | 5.9390  | 57.1810 | 34.1830 | H | 0 |
| 14.1910 | 46.1900 | 38.8510 | N | 0 | 7.6620  | 48.2550 | 35.8750 | O | 0 | 4.3530  | 57.0200 | 32.8620 | C | 0 |
| 13.5860 | 45.3860 | 38.9320 | H | 0 | 8.4650  | 48.9770 | 33.8870 | N | 0 | 4.5360  | 58.0220 | 32.4740 | H | 0 |
| 14.1180 | 46.9890 | 38.2370 | H | 0 | 8.9590  | 48.5850 | 33.0980 | H | 0 | 4.8820  | 56.2820 | 32.2580 | H | 0 |
| 14.8370 | 48.1700 | 41.9800 | C | 0 | 8.6670  | 50.3910 | 34.2140 | C | 0 | 2.9130  | 56.5780 | 32.7340 | C | 0 |

|         |         |         |   |   |         |         |         |   |   |         |         |         |   |   |
|---------|---------|---------|---|---|---------|---------|---------|---|---|---------|---------|---------|---|---|
| 2.8090  | 55.6540 | 33.3030 | H | 0 | 17.0190 | 57.4340 | 47.6050 | C | 0 | 23.3350 | 54.2360 | 50.8020 | H | 0 |
| 2.2100  | 57.2930 | 33.1630 | H | 0 | 16.1360 | 57.9880 | 48.4720 | C | 0 | 23.4370 | 55.6540 | 51.9160 | H | 0 |
| 2.5810  | 56.1890 | 31.3390 | N | 0 | 15.5250 | 57.4150 | 49.1530 | H | 0 | 21.6760 | 55.5930 | 50.7320 | C | 0 |
| 2.8450  | 56.9450 | 30.7230 | H | 0 | 16.3250 | 59.3710 | 48.6000 | N | 0 | 21.1140 | 56.7400 | 51.3430 | C | 0 |
| 2.9250  | 55.3070 | 30.9860 | H | 0 | 15.7220 | 59.9850 | 49.1270 | H | 0 | 21.6760 | 57.2650 | 52.1010 | H | 0 |
| 1.5800  | 56.0890 | 31.2560 | H | 0 | 17.1800 | 59.7780 | 47.5950 | C | 0 | 19.7660 | 57.0540 | 51.0750 | C | 0 |
| 5.3210  | 56.4380 | 37.2130 | C | 0 | 17.4920 | 61.0320 | 47.1170 | C | 0 | 19.3500 | 57.8970 | 51.6060 | H | 0 |
| 4.2600  | 56.1930 | 37.7950 | O | 0 | 17.1330 | 61.8940 | 47.6600 | H | 0 | 18.9970 | 56.1940 | 50.1910 | C | 0 |
| 6.0950  | 57.4840 | 37.4550 | N | 0 | 18.3800 | 61.1690 | 46.0300 | C | 0 | 17.9460 | 56.4260 | 50.1070 | H | 0 |
| 6.9400  | 57.4900 | 36.9020 | H | 0 | 18.6530 | 62.1560 | 45.6880 | H | 0 | 19.6290 | 55.1430 | 49.5030 | C | 0 |
| 5.8490  | 58.6480 | 38.3710 | C | 0 | 18.8260 | 60.0450 | 45.4020 | C | 0 | 19.0110 | 54.6210 | 48.7880 | H | 0 |
| 5.2100  | 59.3670 | 37.8590 | H | 0 | 19.4100 | 60.0560 | 44.4930 | H | 0 | 20.8950 | 54.7880 | 49.8200 | C | 0 |
| 5.3100  | 58.2420 | 39.2270 | H | 0 | 18.5130 | 58.7630 | 45.8930 | C | 0 | 21.2850 | 54.0180 | 49.1710 | H | 0 |
| 7.0780  | 59.3370 | 38.9440 | C | 0 | 18.7660 | 57.8930 | 45.3050 | H | 0 | 25.5800 | 56.1920 | 50.9010 | C | 0 |
| 6.9410  | 60.0910 | 39.9150 | O | 0 | 17.6340 | 58.6080 | 46.9220 | C | 0 | 26.3610 | 55.2650 | 50.8840 | O | 0 |
| 8.2890  | 58.9590 | 38.4210 | N | 0 | 16.8680 | 54.1220 | 45.5570 | C | 0 | 25.8020 | 57.3320 | 51.6250 | N | 0 |
| 8.3280  | 58.0850 | 37.9160 | H | 0 | 17.7050 | 53.4770 | 46.1180 | O | 0 | 25.1250 | 58.0730 | 51.5100 | H | 0 |
| 9.5300  | 59.6270 | 38.6260 | C | 0 | 16.2650 | 53.6820 | 44.4440 | N | 0 | 26.8410 | 57.5590 | 52.6090 | C | 0 |
| 9.7370  | 60.3310 | 37.8200 | H | 0 | 15.5420 | 54.2650 | 44.0480 | H | 0 | 27.5680 | 56.7510 | 52.6770 | H | 0 |
| 9.5940  | 60.1620 | 39.5730 | H | 0 | 16.6990 | 52.4150 | 43.7320 | C | 0 | 27.7440 | 58.7190 | 52.0990 | C | 0 |
| 10.7350 | 58.6370 | 38.6000 | C | 0 | 16.9600 | 51.8150 | 44.6030 | H | 0 | 28.5050 | 58.9970 | 52.8270 | H | 0 |
| 10.6160 | 57.4380 | 38.1630 | O | 0 | 15.6060 | 51.8640 | 42.8420 | C | 0 | 28.1860 | 58.5290 | 51.1210 | H | 0 |
| 11.8070 | 59.2040 | 39.0860 | N | 0 | 15.9560 | 50.9660 | 42.3330 | H | 0 | 27.0700 | 59.5310 | 51.8250 | H | 0 |
| 11.7730 | 60.2090 | 39.1790 | H | 0 | 14.8030 | 51.5600 | 43.5130 | H | 0 | 26.2800 | 57.9130 | 53.9130 | C | 0 |
| 13.0980 | 58.4810 | 39.2050 | C | 0 | 15.1850 | 52.7620 | 41.8620 | O | 0 | 25.4490 | 58.8330 | 53.9910 | O | 0 |
| 13.3770 | 58.0950 | 38.2240 | H | 0 | 14.4980 | 53.3080 | 42.2510 | H | 0 | 26.6920 | 57.2240 | 55.0060 | N | 0 |
| 14.1830 | 59.4370 | 39.7280 | C | 0 | 18.0050 | 52.7280 | 42.9550 | C | 0 | 27.4640 | 56.5980 | 54.8260 | H | 0 |
| 13.7810 | 59.7560 | 40.6890 | H | 0 | 18.2780 | 53.8610 | 42.6060 | O | 0 | 25.8550 | 57.1990 | 56.3760 | C | 0 |
| 15.1580 | 58.9950 | 39.9330 | H | 0 | 18.7990 | 51.7180 | 42.7090 | N | 0 | 25.3290 | 58.1510 | 56.2990 | H | 0 |
| 14.3930 | 60.6500 | 38.8450 | C | 0 | 18.5410 | 50.7810 | 42.9830 | H | 0 | 24.9090 | 55.9510 | 56.4490 | C | 0 |
| 14.0950 | 60.5820 | 37.6290 | O | 0 | 20.0310 | 51.8910 | 41.8840 | C | 0 | 25.5610 | 55.1870 | 56.0250 | H | 0 |
| 14.9260 | 61.6720 | 39.3750 | O | 0 | 20.4900 | 50.9120 | 42.0220 | H | 0 | 24.5010 | 55.7650 | 57.4420 | H | 0 |
| 13.0620 | 57.1460 | 40.0570 | C | 0 | 19.5760 | 52.1330 | 40.4220 | C | 0 | 23.8430 | 56.0950 | 55.3730 | C | 0 |
| 14.0440 | 56.4510 | 40.1050 | O | 0 | 19.1290 | 53.1130 | 40.2520 | H | 0 | 23.2000 | 56.9370 | 55.6300 | H | 0 |
| 11.9290 | 56.8240 | 40.7140 | N | 0 | 20.4260 | 52.1550 | 39.7400 | H | 0 | 24.1730 | 56.2680 | 54.3480 | H | 0 |
| 11.1450 | 57.4530 | 40.6150 | H | 0 | 18.4230 | 50.8750 | 39.8520 | S | 0 | 23.0980 | 54.7170 | 55.2400 | C | 0 |
| 11.7890 | 55.6490 | 41.7050 | C | 0 | 19.2120 | 49.7970 | 39.8880 | H | 0 | 23.7900 | 54.0970 | 54.6700 | H | 0 |
| 10.7920 | 55.8260 | 42.0600 | H | 0 | 21.0080 | 53.0100 | 42.4330 | C | 0 | 22.8800 | 54.2710 | 56.2100 | H | 0 |
| 11.6940 | 54.2810 | 40.9340 | C | 0 | 21.4540 | 53.7640 | 41.5970 | O | 0 | 21.7980 | 54.8450 | 54.5640 | N | 0 |
| 12.6390 | 53.9990 | 40.4680 | H | 0 | 21.1310 | 53.1620 | 43.7930 | N | 0 | 21.7180 | 54.5560 | 53.6000 | H | 0 |
| 11.5380 | 53.5220 | 41.7010 | H | 0 | 20.6040 | 52.4930 | 44.3370 | H | 0 | 20.6520 | 55.3220 | 55.0060 | C | 0 |
| 10.6150 | 54.1000 | 39.8870 | C | 0 | 21.6470 | 54.3460 | 44.4250 | C | 0 | 20.3830 | 55.6830 | 56.2370 | N | 0 |
| 10.5640 | 53.0510 | 39.3050 | O | 0 | 22.2500 | 55.0180 | 43.8140 | H | 0 | 21.0050 | 55.5060 | 57.0120 | H | 0 |
| 9.6980  | 55.0110 | 39.5650 | N | 0 | 20.5730 | 55.1440 | 45.2120 | C | 0 | 19.4770 | 56.0830 | 56.4380 | H | 0 |
| 8.9850  | 54.6760 | 38.9330 | H | 0 | 19.9770 | 54.4750 | 45.8320 | H | 0 | 19.6600 | 55.3940 | 54.1870 | N | 0 |
| 9.7990  | 55.9630 | 39.8860 | H | 0 | 20.9730 | 56.3440 | 46.0700 | C | 0 | 19.9390 | 55.2360 | 53.2290 | H | 0 |
| 12.8700 | 55.6580 | 42.7660 | C | 0 | 21.7260 | 56.0520 | 46.8020 | H | 0 | 18.7220 | 55.6170 | 54.4870 | H | 0 |
| 13.6220 | 54.6590 | 42.9140 | O | 0 | 21.4590 | 57.1320 | 45.4950 | H | 0 | 26.8210 | 57.4550 | 57.5540 | C | 0 |
| 13.2250 | 56.7920 | 43.3610 | N | 0 | 20.1240 | 56.8620 | 46.5160 | H | 0 | 27.8350 | 56.7970 | 57.6740 | O | 0 |
| 12.7410 | 57.6530 | 43.1500 | H | 0 | 19.5720 | 55.6590 | 44.4400 | O | 0 | 26.3980 | 58.3210 | 56.5380 | N | 0 |
| 14.3740 | 56.9010 | 44.2400 | C | 0 | 19.3640 | 54.9270 | 43.8550 | H | 0 | 25.4870 | 58.7260 | 58.3760 | H | 0 |
| 15.3240 | 56.4900 | 43.8970 | H | 0 | 22.6900 | 54.0120 | 45.4970 | C | 0 | 27.0300 | 58.2630 | 59.8860 | C | 0 |
| 14.6860 | 58.3540 | 44.4300 | C | 0 | 22.4280 | 53.3400 | 46.4410 | O | 0 | 28.0910 | 58.1150 | 59.6840 | H | 0 |
| 13.7620 | 58.9170 | 44.5660 | H | 0 | 23.7960 | 54.7520 | 45.4980 | N | 0 | 26.7920 | 59.6480 | 60.5360 | C | 0 |
| 15.2130 | 58.3450 | 45.3840 | H | 0 | 23.8060 | 55.4960 | 44.8150 | H | 0 | 27.3070 | 59.7390 | 61.4920 | H | 0 |
| 15.4550 | 59.0480 | 43.2230 | C | 0 | 24.8610 | 54.7360 | 46.5650 | C | 0 | 27.3270 | 60.3620 | 59.9090 | H | 0 |
| 16.4490 | 58.6440 | 43.4130 | H | 0 | 24.8790 | 53.7600 | 47.0500 | H | 0 | 25.3090 | 60.0300 | 60.8210 | C | 0 |
| 14.9100 | 58.7390 | 42.3300 | H | 0 | 26.3040 | 55.0620 | 46.1670 | C | 0 | 24.7090 | 59.9380 | 59.9160 | H | 0 |
| 15.5500 | 60.5820 | 43.3490 | C | 0 | 26.3650 | 55.9920 | 45.6020 | H | 0 | 24.8860 | 59.4050 | 61.6080 | H | 0 |
| 14.5740 | 60.9580 | 43.0430 | H | 0 | 27.3110 | 55.0370 | 47.3200 | C | 0 | 25.2420 | 61.5050 | 61.1950 | C | 0 |
| 15.6300 | 60.6690 | 44.4330 | H | 0 | 27.0760 | 55.8610 | 47.9940 | H | 0 | 25.9820 | 61.9700 | 60.5440 | H | 0 |
| 16.8200 | 61.2380 | 42.6720 | C | 0 | 27.2590 | 54.1200 | 47.9070 | H | 0 | 24.2160 | 61.8520 | 61.0730 | H | 0 |
| 16.6490 | 62.3070 | 42.7910 | H | 0 | 28.3360 | 55.2250 | 47.0010 | H | 0 | 25.6760 | 61.6830 | 62.5860 | N | 0 |
| 17.7700 | 61.0980 | 43.1890 | H | 0 | 26.6850 | 54.0900 | 45.0190 | C | 0 | 25.8580 | 60.8750 | 63.1650 | H | 0 |
| 16.9910 | 60.8270 | 41.2190 | N | 0 | 25.7830 | 54.0160 | 44.4110 | H | 0 | 26.0570 | 62.8040 | 63.1510 | C | 0 |
| 16.1940 | 61.1460 | 40.6870 | H | 0 | 27.4210 | 54.5360 | 44.3500 | H | 0 | 25.9360 | 63.9810 | 62.5090 | N | 0 |
| 17.8570 | 61.2630 | 40.9320 | H | 0 | 27.0190 | 52.6570 | 45.4610 | C | 0 | 25.4960 | 63.8460 | 61.6100 | H | 0 |
| 17.0390 | 59.8280 | 41.0790 | H | 0 | 27.1210 | 52.1050 | 44.5260 | H | 0 | 25.8760 | 64.8330 | 63.0470 | H | 0 |
| 14.0770 | 56.2340 | 45.5730 | C | 0 | 28.0030 | 52.7120 | 45.9270 | H | 0 | 26.5730 | 62.8260 | 64.3360 | N | 0 |
| 12.9410 | 56.1910 | 46.0790 | O | 0 | 26.2620 | 52.2640 | 46.1400 | H | 0 | 26.6260 | 61.9750 | 64.8770 | H | 0 |
| 15.0640 | 55.5960 | 46.2480 | N | 0 | 24.4630 | 55.7060 | 47.6670 | C | 0 | 26.7120 | 63.7190 | 64.7880 | H | 0 |
| 14.8180 | 55.0880 | 47.0850 | H | 0 | 24.1370 | 56.8120 | 47.3420 | O | 0 | 26.5840 | 57.1210 | 60.7840 | C | 0 |
| 16.4800 | 55.5490 | 45.9640 | C | 0 | 24.5240 | 55.2920 | 48.9300 | N | 0 | 25.3300 | 56.9000 | 60.7880 | O | 0 |
| 16.8480 | 56.2450 | 45.2110 | H | 0 | 24.7190 | 54.3200 | 49.1270 | H | 0 | 27.4120 | 56.2650 | 61.4440 | N | 0 |
| 17.1720 | 56.0170 | 47.2620 | C | 0 | 24.2130 | 56.1070 | 50.0770 | C | 0 | 28.9090 | 56.1380 | 61.3080 | C | 0 |
| 16.7060 | 55.4840 | 48.0910 | H | 0 | 23.8850 | 57.1280 | 49.8810 | H | 0 | 29.3140 | 57.0330 | 61.7780 | H | 0 |
| 18.2470 | 55.8360 | 47.2400 | H | 0 | 23.1840 | 55.3100 | 50.9130 | C | 0 | 29.1330 | 55.8180 | 60.2900 | H | 0 |

|         |         |         |   |   |         |         |         |   |   |         |         |         |   |   |
|---------|---------|---------|---|---|---------|---------|---------|---|---|---------|---------|---------|---|---|
| 29.2710 | 54.9840 | 62.1410 | C | 0 | 25.2330 | 62.4800 | 54.5520 | C | 0 | 22.2800 | 58.3830 | 42.5000 | N | 0 |
| 29.5280 | 55.3320 | 63.1410 | H | 0 | 24.9220 | 63.3320 | 55.1570 | H | 0 | 21.9970 | 59.3070 | 42.2080 | H | 0 |
| 30.1610 | 54.4420 | 61.8210 | H | 0 | 26.6960 | 62.2900 | 55.0440 | C | 0 | 21.6390 | 57.2470 | 41.7590 | C | 0 |
| 28.1020 | 54.0800 | 62.1670 | C | 0 | 26.6870 | 62.3330 | 56.1330 | H | 0 | 21.6310 | 56.3200 | 42.3320 | H | 0 |
| 28.2030 | 53.4120 | 63.0230 | H | 0 | 26.9780 | 61.2680 | 54.7890 | H | 0 | 20.1430 | 57.5460 | 41.6260 | C | 0 |
| 28.0630 | 53.4960 | 61.2470 | H | 0 | 27.7040 | 63.3010 | 54.5690 | C | 0 | 19.8690 | 57.6900 | 42.6710 | H | 0 |
| 26.9500 | 55.0550 | 62.1710 | C | 0 | 28.7020 | 63.0890 | 54.9510 | H | 0 | 19.9480 | 58.4660 | 41.0730 | H | 0 |
| 26.0390 | 54.7170 | 61.6790 | H | 0 | 27.8360 | 63.0740 | 53.5120 | H | 0 | 19.2560 | 56.4140 | 41.0170 | C | 0 |
| 26.4510 | 55.3070 | 63.5980 | C | 0 | 27.2550 | 64.7440 | 54.8270 | C | 0 | 19.5580 | 56.3250 | 39.9730 | H | 0 |
| 26.0580 | 54.2940 | 64.1620 | O | 0 | 26.2970 | 64.7670 | 54.3090 | H | 0 | 19.5500 | 55.4460 | 41.4220 | H | 0 |
| 26.4700 | 56.4910 | 64.1870 | N | 0 | 27.1690 | 64.8570 | 55.9080 | H | 0 | 17.7450 | 56.7600 | 41.0300 | C | 0 |
| 26.8240 | 57.3110 | 63.7160 | H | 0 | 28.1300 | 65.8420 | 54.4140 | N | 0 | 17.3620 | 57.9060 | 40.8800 | O | 0 |
| 25.8750 | 56.7740 | 65.5010 | C | 0 | 28.9180 | 65.9480 | 55.0370 | H | 0 | 16.8730 | 55.8130 | 41.0730 | N | 0 |
| 26.3100 | 55.9360 | 66.0450 | H | 0 | 28.0840 | 66.4440 | 53.2740 | C | 0 | 15.8910 | 55.9980 | 40.9240 | H | 0 |
| 26.3770 | 58.1160 | 66.0480 | C | 0 | 27.1480 | 66.2040 | 52.4000 | N | 0 | 17.1580 | 54.8530 | 41.2040 | H | 0 |
| 25.8920 | 58.3120 | 67.0040 | H | 0 | 26.3580 | 65.6110 | 52.6130 | H | 0 | 22.3280 | 57.0620 | 40.3890 | C | 0 |
| 27.4410 | 58.1960 | 66.2670 | H | 0 | 27.2270 | 66.6920 | 51.5190 | H | 0 | 22.4450 | 57.9650 | 39.5850 | O | 0 |
| 25.9190 | 59.3490 | 65.1820 | C | 0 | 28.9410 | 67.3930 | 52.9780 | N | 0 | 22.7170 | 55.7990 | 40.0910 | N | 0 |
| 25.6090 | 59.2490 | 63.9810 | O | 0 | 29.5050 | 67.5530 | 53.8010 | H | 0 | 22.5510 | 55.2260 | 40.9060 | H | 0 |
| 25.8250 | 60.4620 | 65.7050 | O | 0 | 28.9440 | 67.8410 | 52.0730 | H | 0 | 23.2510 | 55.2340 | 38.8160 | C | 0 |
| 24.2740 | 56.7430 | 65.5090 | C | 0 | 25.1000 | 62.8520 | 53.0420 | C | 0 | 24.0750 | 55.8520 | 38.4600 | H | 0 |
| 23.6660 | 56.2330 | 66.4600 | O | 0 | 24.8650 | 64.0090 | 52.7250 | O | 0 | 23.7570 | 53.7650 | 39.2470 | C | 0 |
| 23.7000 | 57.1450 | 64.4120 | N | 0 | 25.1960 | 61.8790 | 52.1680 | N | 0 | 22.9980 | 53.2510 | 39.8360 | H | 0 |
| 24.3280 | 57.2670 | 63.6310 | H | 0 | 25.4950 | 60.9700 | 52.4900 | H | 0 | 23.9050 | 53.1200 | 38.3800 | H | 0 |
| 22.2400 | 57.2150 | 64.1050 | C | 0 | 24.9310 | 61.9940 | 50.7030 | C | 0 | 25.0230 | 53.8820 | 40.1330 | C | 0 |
| 21.7300 | 56.6310 | 64.8710 | H | 0 | 24.2060 | 62.7700 | 50.4590 | H | 0 | 25.4850 | 52.8950 | 40.1180 | H | 0 |
| 21.8250 | 58.7510 | 64.2290 | C | 0 | 26.1360 | 62.5980 | 49.9490 | C | 0 | 25.7170 | 54.6670 | 39.8310 | H | 0 |
| 20.7930 | 58.8800 | 63.9040 | H | 0 | 25.8670 | 62.8730 | 48.9290 | H | 0 | 24.5620 | 54.1780 | 41.8790 | S | 0 |
| 22.0840 | 59.3660 | 65.6160 | C | 0 | 26.3580 | 63.5510 | 50.4290 | H | 0 | 24.4300 | 52.4480 | 42.5260 | C | 0 |
| 23.1630 | 59.4430 | 65.7520 | H | 0 | 27.4550 | 61.7160 | 49.8120 | C | 0 | 23.9740 | 52.4820 | 43.5160 | H | 0 |
| 21.7620 | 60.4070 | 65.6300 | H | 0 | 28.5480 | 61.7820 | 50.6430 | C | 0 | 23.8700 | 51.8110 | 41.8420 | H | 0 |
| 21.5360 | 58.7680 | 66.3450 | H | 0 | 28.6210 | 62.4440 | 51.4940 | H | 0 | 25.3930 | 52.0190 | 42.8040 | H | 0 |
| 22.7070 | 59.5770 | 63.4350 | O | 0 | 29.4990 | 60.9350 | 50.2790 | N | 0 | 22.1410 | 55.2320 | 37.6920 | C | 0 |
| 23.6140 | 59.4300 | 63.7160 | H | 0 | 30.3350 | 60.7450 | 50.8150 | H | 0 | 22.4190 | 55.7150 | 36.6090 | O | 0 |
| 21.9410 | 56.5970 | 62.7050 | C | 0 | 29.0560 | 60.0760 | 49.2360 | C | 0 | 20.9230 | 54.7120 | 37.9580 | N | 0 |
| 20.7640 | 56.6830 | 62.2580 | O | 0 | 29.6330 | 58.9510 | 48.6310 | C | 0 | 20.7960 | 54.2120 | 38.8260 | H | 0 |
| 22.9760 | 56.0970 | 61.9850 | N | 0 | 30.5710 | 58.4670 | 48.8580 | H | 0 | 19.9430 | 54.4740 | 36.8780 | C | 0 |
| 23.9210 | 56.0970 | 62.3410 | H | 0 | 28.9240 | 58.4380 | 47.4980 | C | 0 | 20.2050 | 54.9410 | 35.9290 | H | 0 |
| 22.7140 | 55.4270 | 60.6320 | C | 0 | 29.4080 | 57.6690 | 46.9140 | H | 0 | 19.9280 | 52.9690 | 36.5470 | C | 0 |
| 23.6340 | 54.9540 | 60.2870 | H | 0 | 27.6750 | 58.9150 | 47.1200 | C | 0 | 19.2970 | 52.4500 | 37.2690 | H | 0 |
| 21.9350 | 54.6700 | 60.7110 | H | 0 | 27.2170 | 58.5010 | 46.2340 | H | 0 | 19.3230 | 52.5970 | 35.1700 | C | 0 |
| 22.3200 | 56.5100 | 59.5940 | C | 0 | 27.0430 | 59.9840 | 47.8210 | C | 0 | 19.6540 | 53.1960 | 34.3220 | H | 0 |
| 21.9790 | 56.0560 | 58.4640 | O | 0 | 26.1380 | 60.3710 | 47.3760 | H | 0 | 19.4770 | 51.5230 | 35.0570 | H | 0 |
| 22.2820 | 57.8400 | 59.8480 | N | 0 | 27.6980 | 60.5750 | 48.9010 | C | 0 | 18.2660 | 52.7800 | 35.3620 | H | 0 |
| 22.7800 | 58.0730 | 60.6950 | H | 0 | 24.4440 | 60.7740 | 50.1020 | C | 0 | 21.1390 | 52.3170 | 36.5560 | O | 0 |
| 21.7000 | 58.8790 | 58.9830 | C | 0 | 24.6330 | 59.7060 | 50.6020 | O | 0 | 20.9670 | 51.4380 | 36.9000 | H | 0 |
| 20.7410 | 58.4820 | 58.6480 | H | 0 | 23.6160 | 60.8420 | 49.0530 | N | 0 | 18.6160 | 54.9810 | 37.3530 | C | 0 |
| 21.4920 | 60.1470 | 59.7440 | C | 0 | 23.3980 | 61.7610 | 48.6960 | H | 0 | 17.7550 | 54.1760 | 37.7070 | O | 0 |
| 22.3520 | 60.5410 | 60.2850 | H | 0 | 23.2550 | 59.7180 | 48.2370 | C | 0 | 18.2890 | 56.3000 | 37.3680 | N | 0 |
| 21.1490 | 60.9120 | 59.0470 | H | 0 | 23.9920 | 58.9310 | 48.3920 | H | 0 | 19.1560 | 57.4540 | 37.0960 | C | 0 |
| 20.3450 | 60.0170 | 60.7820 | C | 0 | 21.9550 | 58.9720 | 48.7140 | C | 0 | 19.8360 | 57.2500 | 36.2700 | H | 0 |
| 19.4500 | 59.7120 | 60.2400 | H | 0 | 22.0240 | 57.9790 | 48.2680 | H | 0 | 19.6910 | 57.7660 | 37.9930 | H | 0 |
| 20.6890 | 59.2970 | 61.5240 | H | 0 | 21.9880 | 58.9000 | 49.8010 | H | 0 | 18.1990 | 58.5310 | 36.6880 | C | 0 |
| 20.0000 | 61.2870 | 61.4770 | C | 0 | 21.0400 | 59.4280 | 48.3370 | H | 0 | 18.1620 | 58.4150 | 35.6050 | H | 0 |
| 20.0010 | 62.1070 | 60.7590 | H | 0 | 23.1560 | 60.2010 | 46.7180 | C | 0 | 18.6030 | 59.4870 | 37.0230 | H | 0 |
| 18.9650 | 61.2470 | 61.8150 | H | 0 | 22.8390 | 61.3760 | 46.4680 | O | 0 | 16.9340 | 58.3120 | 37.5120 | C | 0 |
| 20.8860 | 61.8030 | 62.6550 | C | 0 | 23.4950 | 59.3350 | 45.7660 | N | 0 | 16.1580 | 58.8130 | 36.9340 | H | 0 |
| 20.8380 | 60.9960 | 63.3870 | H | 0 | 23.6520 | 58.4140 | 46.1490 | H | 0 | 16.8700 | 58.7830 | 38.4930 | H | 0 |
| 21.9380 | 62.0200 | 62.4730 | H | 0 | 23.6120 | 59.5030 | 44.2660 | C | 0 | 16.8960 | 56.7570 | 37.6330 | C | 0 |
| 20.2800 | 63.0100 | 63.2510 | N | 0 | 22.9810 | 60.3330 | 43.9480 | H | 0 | 16.5950 | 56.5620 | 38.6620 | H | 0 |
| 20.1530 | 63.7840 | 62.6130 | H | 0 | 25.1100 | 59.8470 | 43.8360 | C | 0 | 15.9290 | 56.0280 | 36.6430 | C | 0 |
| 19.4160 | 62.7610 | 63.7110 | H | 0 | 25.3960 | 60.8550 | 44.1370 | H | 0 | 16.2540 | 55.9520 | 35.4360 | O | 0 |
| 20.9090 | 63.3120 | 63.9810 | H | 0 | 25.7650 | 59.1650 | 44.3770 | H | 0 | 14.7860 | 55.5920 | 37.1020 | N | 0 |
| 22.5080 | 59.0890 | 57.7250 | C | 0 | 25.4450 | 59.7850 | 42.3130 | C | 0 | 14.5430 | 55.6130 | 38.0830 | H | 0 |
| 23.7510 | 58.8990 | 57.7410 | O | 0 | 25.3980 | 60.9580 | 41.5440 | C | 0 | 13.7470 | 54.8480 | 36.3640 | C | 0 |
| 21.8980 | 59.3580 | 56.5910 | N | 0 | 25.3450 | 61.8850 | 42.0950 | H | 0 | 13.1020 | 54.4730 | 37.1580 | H | 0 |
| 20.8970 | 59.4700 | 56.6550 | H | 0 | 25.4820 | 60.8630 | 40.1650 | C | 0 | 12.8720 | 55.7880 | 35.5290 | C | 0 |
| 22.6430 | 59.6870 | 55.2910 | C | 0 | 25.4600 | 61.8140 | 39.6530 | H | 0 | 12.6410 | 56.6230 | 36.1910 | H | 0 |
| 23.5260 | 59.0490 | 55.2550 | H | 0 | 25.6740 | 59.6630 | 39.5380 | C | 0 | 13.4390 | 56.0640 | 34.6400 | H | 0 |
| 21.8430 | 59.4230 | 53.9760 | C | 0 | 25.8230 | 59.6150 | 38.1760 | O | 0 | 11.5860 | 55.1610 | 35.0140 | C | 0 |
| 22.4600 | 59.6480 | 53.1060 | H | 0 | 25.0780 | 60.0260 | 37.7320 | H | 0 | 10.7900 | 54.2300 | 35.6840 | C | 0 |
| 21.6340 | 58.3550 | 54.0220 | H | 0 | 25.7510 | 58.4590 | 40.2720 | C | 0 | 11.0180 | 53.6370 | 36.5570 | H | 0 |
| 20.9450 | 60.0340 | 54.0670 | H | 0 | 25.8840 | 57.4950 | 39.8030 | H | 0 | 9.7070  | 54.0100 | 34.8450 | N | 0 |
| 23.1330 | 61.1010 | 55.3190 | C | 0 | 25.6600 | 58.5690 | 41.6780 | C | 0 | 8.8380  | 53.5760 | 35.1180 | H | 0 |
| 22.3520 | 62.0360 | 55.5180 | O | 0 | 25.6800 | 57.6140 | 42.1810 | H | 0 | 9.7140  | 54.7370 | 33.6700 | C | 0 |
| 24.4120 | 61.2830 | 54.9380 | N | 0 | 23.1230 | 58.2310 | 43.5300 | C | 0 | 8.7700  | 54.8780 | 32.6310 | C | 0 |
| 24.7780 | 60.3710 | 54.7030 | H | 0 | 23.5630 | 57.1360 | 43.8660 | O | 0 | 7.8480  | 54.3190 | 32.5730 | H | 0 |

|         |         |         |   |   |         |         |         |   |   |         |         |         |   |   |
|---------|---------|---------|---|---|---------|---------|---------|---|---|---------|---------|---------|---|---|
| 9.1710  | 55.6840 | 31.4650 | C | 0 | 21.4820 | 45.7800 | 34.7890 | H | 0 | 31.4120 | 47.8910 | 47.9170 | H | 0 |
| 8.5110  | 55.7540 | 30.6130 | H | 0 | 21.3270 | 46.3940 | 32.6540 | C | 0 | 31.8080 | 49.8890 | 47.3070 | C | 0 |
| 10.3090 | 56.4480 | 31.5200 | C | 0 | 21.6620 | 45.4310 | 32.3000 | H | 0 | 31.8800 | 50.3530 | 46.3230 | H | 0 |
| 10.5790 | 57.0670 | 30.6780 | H | 0 | 20.8320 | 47.4690 | 31.7960 | C | 0 | 30.7930 | 50.5160 | 48.1780 | C | 0 |
| 11.1030 | 56.3870 | 32.6860 | C | 0 | 21.0120 | 47.4560 | 30.4350 | O | 0 | 30.7650 | 50.0260 | 49.1510 | H | 0 |
| 12.0430 | 56.9180 | 32.6840 | H | 0 | 21.2460 | 46.5780 | 30.1260 | H | 0 | 31.1200 | 51.5360 | 48.3810 | H | 0 |
| 10.8710 | 55.5150 | 33.7940 | C | 0 | 20.2740 | 48.6470 | 32.3950 | C | 0 | 29.3340 | 50.5290 | 47.6280 | C | 0 |
| 14.2040 | 53.6270 | 35.6240 | C | 0 | 19.9410 | 49.3930 | 31.6890 | H | 0 | 28.7870 | 51.2640 | 48.2180 | H | 0 |
| 14.1920 | 53.6590 | 34.4030 | O | 0 | 20.0290 | 48.6700 | 33.7690 | C | 0 | 29.2410 | 50.9380 | 46.6220 | H | 0 |
| 14.7580 | 52.6200 | 36.2920 | N | 0 | 19.4100 | 49.4920 | 34.0980 | H | 0 | 28.4220 | 49.0030 | 47.7490 | S | 0 |
| 15.0570 | 52.6810 | 37.2550 | H | 0 | 19.7650 | 46.8860 | 38.4130 | C | 0 | 27.8740 | 48.8520 | 45.9910 | C | 0 |
| 15.1230 | 51.3490 | 35.6520 | C | 0 | 19.2700 | 47.8980 | 38.8630 | O | 0 | 27.5350 | 47.8820 | 45.6260 | H | 0 |
| 15.9810 | 51.3970 | 34.9810 | H | 0 | 20.2770 | 45.9230 | 39.2290 | N | 0 | 26.9980 | 49.4750 | 45.8170 | H | 0 |
| 15.5230 | 50.3900 | 36.7480 | C | 0 | 20.3040 | 44.9500 | 38.9600 | H | 0 | 28.7310 | 49.1690 | 45.3960 | H | 0 |
| 16.5640 | 50.6710 | 36.9130 | H | 0 | 20.5490 | 46.0020 | 40.6320 | C | 0 | 33.2420 | 49.9330 | 47.8860 | C | 0 |
| 15.0500 | 50.5750 | 37.7120 | H | 0 | 19.9650 | 46.8150 | 41.0640 | H | 0 | 33.5540 | 49.6620 | 49.0200 | O | 0 |
| 15.4240 | 48.9440 | 36.3850 | C | 0 | 20.2090 | 44.6430 | 41.2830 | C | 0 | 34.2640 | 50.1800 | 47.0100 | N | 0 |
| 16.1650 | 48.5140 | 35.4840 | O | 0 | 20.9310 | 43.9070 | 40.9320 | H | 0 | 34.0060 | 50.3270 | 46.0450 | H | 0 |
| 14.5710 | 48.2380 | 37.0100 | O | 0 | 20.3640 | 44.7000 | 42.3600 | H | 0 | 35.7340 | 50.1730 | 47.3070 | C | 0 |
| 13.9570 | 50.7850 | 34.8070 | C | 0 | 18.7820 | 44.1000 | 41.0380 | C | 0 | 35.9270 | 49.5860 | 48.2050 | H | 0 |
| 12.8040 | 50.7850 | 35.2930 | O | 0 | 17.7460 | 44.8410 | 41.1390 | O | 0 | 36.5730 | 49.7610 | 46.1360 | C | 0 |
| 14.2980 | 50.1370 | 33.6730 | N | 0 | 18.5450 | 42.9560 | 40.5650 | O | 0 | 36.7300 | 50.6680 | 45.5530 | H | 0 |
| 15.2130 | 50.2960 | 33.2770 | H | 0 | 21.9170 | 46.5330 | 40.9150 | C | 0 | 38.0440 | 49.3500 | 46.5750 | C | 0 |
| 13.3490 | 49.2840 | 32.9100 | C | 0 | 22.9360 | 45.7890 | 40.8730 | O | 0 | 38.6330 | 50.1450 | 47.0320 | H | 0 |
| 12.4400 | 49.2090 | 33.5070 | H | 0 | 22.0360 | 47.8510 | 41.0760 | N | 0 | 37.9970 | 48.5720 | 47.3370 | H | 0 |
| 13.0300 | 50.1640 | 31.6910 | C | 0 | 21.2240 | 48.4410 | 40.9670 | H | 0 | 38.6610 | 48.9950 | 45.7490 | H | 0 |
| 12.1940 | 49.7560 | 31.1240 | H | 0 | 23.2260 | 48.6230 | 41.3070 | C | 0 | 35.9550 | 48.6800 | 45.2430 | C | 0 |
| 12.7910 | 51.1810 | 32.0020 | H | 0 | 24.0200 | 48.3910 | 40.5980 | H | 0 | 36.1370 | 47.7280 | 45.7420 | H | 0 |
| 14.1080 | 50.2660 | 30.7390 | O | 0 | 22.9910 | 49.6790 | 41.1770 | H | 0 | 34.9160 | 48.9440 | 45.0470 | H | 0 |
| 14.7080 | 50.9670 | 31.0030 | H | 0 | 23.8510 | 48.4720 | 42.7080 | C | 0 | 36.3470 | 48.5880 | 43.7420 | C | 0 |
| 13.9210 | 47.9220 | 32.5270 | C | 0 | 24.0670 | 49.4770 | 43.4170 | O | 0 | 35.6580 | 47.9530 | 43.1840 | H | 0 |
| 13.3210 | 47.1720 | 31.7260 | O | 0 | 24.0810 | 47.2290 | 43.1160 | N | 0 | 36.3220 | 49.6360 | 43.4440 | H | 0 |
| 15.1020 | 47.6260 | 33.0410 | N | 0 | 23.8200 | 46.5090 | 42.4580 | H | 0 | 37.3980 | 48.3420 | 43.5910 | H | 0 |
| 15.5990 | 48.2690 | 33.6410 | H | 0 | 24.6880 | 46.8940 | 44.4280 | C | 0 | 36.0240 | 51.6030 | 47.7330 | C | 0 |
| 15.9160 | 46.4660 | 32.6610 | C | 0 | 25.1840 | 47.7860 | 44.8110 | H | 0 | 35.4990 | 52.5250 | 47.0420 | O | 0 |
| 15.4350 | 45.9830 | 31.8110 | H | 0 | 23.4500 | 46.6120 | 45.4130 | C | 0 | 36.8060 | 51.8140 | 48.7920 | N | 0 |
| 17.2780 | 46.8860 | 32.1280 | C | 0 | 22.8500 | 47.5060 | 45.5840 | H | 0 | 37.3020 | 51.0270 | 49.1860 | H | 0 |
| 17.8660 | 47.2140 | 32.9850 | H | 0 | 22.4840 | 45.5090 | 45.1850 | C | 0 | 37.2090 | 53.1160 | 49.2990 | C | 0 |
| 17.6900 | 45.9540 | 31.7410 | H | 0 | 23.0380 | 44.5830 | 45.0330 | H | 0 | 36.5870 | 53.8610 | 48.8030 | H | 0 |
| 17.2430 | 47.9680 | 31.0340 | C | 0 | 21.9150 | 45.5130 | 46.1150 | H | 0 | 36.8900 | 53.2540 | 50.8560 | C | 0 |
| 16.9820 | 47.7910 | 29.7360 | C | 0 | 21.7700 | 45.6500 | 44.3720 | H | 0 | 37.5710 | 52.5660 | 51.3570 | H | 0 |
| 16.8480 | 46.7810 | 29.3780 | H | 0 | 24.2070 | 46.2480 | 46.6910 | C | 0 | 37.1780 | 54.2590 | 51.1660 | H | 0 |
| 16.9630 | 49.0260 | 29.1550 | N | 0 | 23.5700 | 46.1730 | 47.5720 | H | 0 | 35.4170 | 53.0120 | 51.1640 | C | 0 |
| 16.8020 | 49.1460 | 28.1650 | H | 0 | 24.8090 | 45.3410 | 46.6360 | H | 0 | 35.2290 | 51.9650 | 50.9260 | H | 0 |
| 16.9350 | 50.0270 | 30.0480 | C | 0 | 24.9460 | 46.9990 | 46.9690 | H | 0 | 35.1810 | 53.3000 | 52.6490 | C | 0 |
| 16.9050 | 51.4800 | 29.8310 | C | 0 | 25.6580 | 45.6830 | 44.2250 | C | 0 | 35.9710 | 52.7820 | 53.1930 | H | 0 |
| 16.8900 | 51.9200 | 28.8450 | H | 0 | 25.3280 | 44.5130 | 44.1000 | O | 0 | 35.2170 | 54.3680 | 52.8600 | H | 0 |
| 17.0520 | 52.2990 | 30.9250 | C | 0 | 26.9140 | 45.9950 | 44.2090 | N | 0 | 34.2220 | 52.8850 | 52.9600 | H | 0 |
| 17.0950 | 53.3770 | 30.8620 | H | 0 | 27.1260 | 46.9810 | 44.2650 | H | 0 | 34.4110 | 53.7730 | 50.3500 | C | 0 |
| 17.1030 | 51.7430 | 32.1980 | C | 0 | 28.0420 | 45.0790 | 43.8820 | C | 0 | 34.4820 | 54.8490 | 50.5110 | H | 0 |
| 17.1380 | 52.4670 | 32.9980 | H | 0 | 27.6560 | 44.0610 | 43.9210 | H | 0 | 34.5990 | 53.6030 | 49.2900 | H | 0 |
| 17.1770 | 50.3480 | 32.4450 | C | 0 | 28.5710 | 45.3770 | 42.4700 | C | 0 | 33.4060 | 53.3940 | 50.5310 | H | 0 |
| 17.3200 | 49.9260 | 33.4290 | H | 0 | 28.8720 | 46.4050 | 42.2690 | H | 0 | 38.7200 | 53.3890 | 49.0420 | C | 0 |
| 17.1760 | 49.4130 | 31.3160 | C | 0 | 29.3690 | 44.6460 | 42.3390 | H | 0 | 39.5660 | 53.3430 | 49.9260 | O | 0 |
| 16.0350 | 45.4610 | 33.8520 | C | 0 | 27.6990 | 44.8080 | 41.3680 | C | 0 | 39.0760 | 53.4720 | 47.7290 | N | 0 |
| 16.4890 | 44.3670 | 33.6280 | O | 0 | 26.9910 | 43.8340 | 41.5030 | O | 0 | 38.3300 | 53.4140 | 46.4530 | C | 0 |
| 15.6940 | 45.8300 | 34.9920 | N | 0 | 27.8110 | 45.3370 | 40.1710 | N | 0 | 37.4650 | 54.0610 | 46.5970 | H | 0 |
| 15.3750 | 46.7670 | 35.1930 | H | 0 | 27.5000 | 44.8470 | 39.3440 | H | 0 | 38.1230 | 52.3590 | 46.2800 | H | 0 |
| 16.2920 | 45.2150 | 36.1700 | C | 0 | 28.5310 | 46.0360 | 40.0640 | H | 0 | 39.2400 | 54.0100 | 45.3440 | C | 0 |
| 16.0350 | 45.8530 | 37.0160 | H | 0 | 29.0920 | 45.1160 | 44.9900 | C | 0 | 38.9730 | 55.0660 | 45.3660 | H | 0 |
| 15.5350 | 43.9510 | 36.5270 | C | 0 | 29.2730 | 44.2120 | 45.8590 | O | 0 | 39.0340 | 53.4030 | 44.4620 | H | 0 |
| 14.4900 | 44.2590 | 36.4930 | H | 0 | 29.8810 | 46.1810 | 44.9260 | N | 0 | 40.5760 | 53.6380 | 45.8710 | C | 0 |
| 15.7400 | 43.1450 | 35.8220 | H | 0 | 29.9280 | 46.6900 | 44.0550 | H | 0 | 41.3270 | 54.2810 | 45.4130 | H | 0 |
| 15.8710 | 43.4580 | 37.9790 | C | 0 | 31.0000 | 46.5060 | 45.8830 | C | 0 | 40.8100 | 52.5940 | 45.6660 | H | 0 |
| 16.8780 | 43.8980 | 38.6090 | O | 0 | 30.6970 | 46.2570 | 46.9000 | H | 0 | 40.4070 | 53.9130 | 47.3640 | C | 0 |
| 15.1380 | 42.7600 | 38.7120 | O | 0 | 32.2340 | 45.7070 | 45.4180 | C | 0 | 41.0730 | 53.2300 | 47.8910 | H | 0 |
| 17.8750 | 45.1580 | 36.2230 | C | 0 | 32.8800 | 45.7900 | 46.2920 | H | 0 | 40.6410 | 55.3740 | 47.6980 | C | 0 |
| 18.5780 | 44.0980 | 36.2730 | O | 0 | 32.1000 | 44.6280 | 45.3350 | H | 0 | 39.7240 | 56.1590 | 47.5100 | O | 0 |
| 18.3880 | 46.3770 | 36.2420 | N | 0 | 33.1360 | 46.2730 | 44.2870 | C | 0 | 41.8580 | 55.7230 | 48.0670 | N | 0 |
| 17.7660 | 47.1160 | 35.9490 | H | 0 | 33.2630 | 47.3530 | 44.2250 | H | 0 | 42.6260 | 55.0690 | 48.1090 | H | 0 |
| 19.7330 | 46.6700 | 36.8720 | C | 0 | 34.1780 | 45.9900 | 44.4370 | H | 0 | 42.2880 | 57.1490 | 47.8700 | C | 0 |
| 20.3980 | 45.8060 | 36.8380 | H | 0 | 32.6790 | 45.8270 | 42.8960 | C | 0 | 41.4960 | 57.8860 | 48.0040 | H | 0 |
| 20.3950 | 47.8210 | 36.0700 | C | 0 | 31.4730 | 45.8380 | 42.5840 | O | 0 | 43.2430 | 57.4730 | 49.0030 | C | 0 |
| 19.8720 | 48.7630 | 36.2370 | H | 0 | 33.5630 | 45.4500 | 42.1090 | O | 0 | 44.0820 | 56.7780 | 48.9730 | H | 0 |
| 21.4280 | 47.8760 | 36.4130 | H | 0 | 31.2300 | 47.9750 | 45.8860 | C | 0 | 43.6570 | 58.4740 | 48.8770 | H | 0 |
| 20.4940 | 47.6580 | 34.6130 | C | 0 | 31.2040 | 48.5810 | 44.8270 | O | 0 | 42.6850 | 57.3220 | 50.4680 | C | 0 |
| 21.1460 | 46.5250 | 34.0830 | C | 0 | 31.4420 | 48.4760 | 47.0940 | N | 0 | 43.4630 | 57.7010 | 51.4380 | O | 0 |

|         |         |         |   |   |         |         |         |   |   |         |         |         |   |   |
|---------|---------|---------|---|---|---------|---------|---------|---|---|---------|---------|---------|---|---|
| 41.7690 | 56.5520 | 50.8050 | O | 0 | 47.8220 | 66.2740 | 42.0500 | H | 0 | 39.0440 | 58.0300 | 48.0810 | H | 0 |
| 42.9050 | 57.3600 | 46.4140 | C | 0 | 47.6220 | 67.9880 | 42.4990 | H | 0 | 37.1840 | 58.4480 | 47.0400 | C | 0 |
| 43.4890 | 56.4130 | 45.8580 | C | 0 | 47.2650 | 66.6820 | 44.0930 | C | 0 | 36.4850 | 59.2640 | 47.2260 | H | 0 |
| 42.7860 | 58.5270 | 45.7960 | N | 0 | 48.1730 | 67.1310 | 44.8090 | O | 0 | 37.5690 | 58.5570 | 45.5270 | C | 0 |
| 42.1570 | 59.2200 | 46.1770 | H | 0 | 46.3230 | 65.9980 | 44.7200 | N | 0 | 38.2850 | 57.7920 | 45.2250 | H | 0 |
| 43.2890 | 58.8170 | 44.4360 | C | 0 | 45.5240 | 65.7130 | 44.1730 | H | 0 | 36.7230 | 58.5810 | 44.8410 | H | 0 |
| 43.9940 | 57.9990 | 44.2880 | H | 0 | 46.5360 | 65.4090 | 46.0810 | C | 0 | 38.3500 | 60.1340 | 45.0910 | S | 0 |
| 42.1820 | 58.7010 | 43.4270 | C | 0 | 47.6080 | 65.2570 | 46.2080 | H | 0 | 39.3430 | 59.9940 | 45.9730 | H | 0 |
| 41.4390 | 59.4870 | 43.5600 | H | 0 | 45.9250 | 66.4340 | 47.0850 | C | 0 | 36.4690 | 57.0850 | 47.3400 | C | 0 |
| 42.5210 | 58.9670 | 42.4250 | H | 0 | 46.0700 | 66.0290 | 48.0860 | H | 0 | 36.7450 | 56.3120 | 48.2090 | O | 0 |
| 41.3940 | 57.3330 | 43.2940 | C | 0 | 46.4170 | 67.4010 | 46.9830 | H | 0 | 35.3270 | 56.9520 | 46.6150 | N | 0 |
| 41.1130 | 57.0130 | 44.2970 | H | 0 | 44.3700 | 66.5860 | 46.9670 | C | 0 | 35.0090 | 57.6480 | 45.9560 | H | 0 |
| 40.0550 | 57.6810 | 42.6550 | C | 0 | 43.9960 | 66.5210 | 45.9450 | H | 0 | 34.6800 | 55.6370 | 46.4750 | C | 0 |
| 39.4280 | 58.4010 | 43.1810 | H | 0 | 43.9320 | 65.7700 | 47.5420 | H | 0 | 35.2650 | 54.8490 | 46.9510 | H | 0 |
| 40.2500 | 58.0430 | 41.6450 | H | 0 | 43.9140 | 67.8990 | 47.5780 | C | 0 | 33.3850 | 55.8010 | 47.3050 | C | 0 |
| 39.4320 | 56.7920 | 42.5640 | H | 0 | 44.1880 | 67.9350 | 48.6320 | H | 0 | 33.7330 | 56.0810 | 48.2990 | H | 0 |
| 42.0910 | 56.2740 | 42.5090 | C | 0 | 44.3780 | 68.7520 | 47.0820 | H | 0 | 32.8180 | 56.6140 | 46.8510 | H | 0 |
| 41.6020 | 55.3010 | 42.5640 | H | 0 | 42.3860 | 68.1470 | 47.5800 | C | 0 | 32.4220 | 54.6080 | 47.3850 | C | 0 |
| 42.2200 | 56.6680 | 41.5020 | H | 0 | 42.2360 | 69.0810 | 48.1220 | H | 0 | 33.0640 | 53.7300 | 47.4430 | H | 0 |
| 43.0660 | 56.1820 | 42.9880 | H | 0 | 42.0130 | 68.3840 | 46.5840 | H | 0 | 31.5680 | 54.8230 | 48.2680 | C | 0 |
| 43.9920 | 60.1650 | 44.3340 | C | 0 | 41.6560 | 66.9710 | 48.0490 | N | 0 | 30.8140 | 54.0360 | 48.6490 | H | 0 |
| 43.7200 | 61.0630 | 45.1010 | O | 0 | 41.8010 | 66.1350 | 47.5000 | H | 0 | 32.1570 | 55.0510 | 49.5360 | H | 0 |
| 44.9790 | 60.3590 | 43.4410 | N | 0 | 41.9170 | 66.6880 | 48.9830 | H | 0 | 30.8790 | 55.6640 | 48.5800 | H | 0 |
| 45.2160 | 59.5440 | 42.8920 | H | 0 | 40.6580 | 67.1200 | 48.0820 | H | 0 | 31.4800 | 54.3560 | 46.2680 | C | 0 |
| 45.7860 | 61.5440 | 43.2620 | C | 0 | 45.8970 | 64.0330 | 46.2420 | C | 0 | 32.0330 | 53.8750 | 45.4610 | H | 0 |
| 46.0810 | 62.0270 | 44.1930 | H | 0 | 44.9590 | 63.7490 | 45.4640 | O | 0 | 30.6800 | 53.6620 | 46.5250 | H | 0 |
| 47.1200 | 61.1460 | 42.6800 | C | 0 | 46.3590 | 63.3550 | 47.2930 | N | 0 | 31.0980 | 55.3110 | 45.9070 | H | 0 |
| 47.6920 | 62.0740 | 42.6560 | H | 0 | 47.1180 | 63.7810 | 47.8050 | H | 0 | 34.3780 | 55.2370 | 45.0000 | C | 0 |
| 47.8790 | 60.1550 | 43.6320 | C | 0 | 45.8120 | 62.0670 | 47.7320 | C | 0 | 34.1030 | 56.1960 | 44.2650 | O | 0 |
| 47.3220 | 59.2810 | 43.9680 | H | 0 | 45.7900 | 61.4210 | 46.8540 | H | 0 | 34.6810 | 53.9210 | 44.6320 | N | 0 |
| 48.7450 | 59.7480 | 43.1090 | H | 0 | 46.7520 | 61.4240 | 48.7440 | C | 0 | 34.9360 | 53.2240 | 45.3170 | H | 0 |
| 48.1950 | 60.7570 | 44.4840 | H | 0 | 47.8190 | 61.4700 | 48.5300 | H | 0 | 34.3720 | 53.4540 | 43.3280 | C | 0 |
| 46.9390 | 60.4830 | 41.4440 | O | 0 | 46.6300 | 61.9370 | 49.6980 | H | 0 | 33.6970 | 54.1800 | 42.8750 | H | 0 |
| 46.5180 | 61.0350 | 40.7810 | H | 0 | 46.4330 | 59.9100 | 49.0150 | C | 0 | 35.6710 | 53.0810 | 42.4750 | C | 0 |
| 45.0720 | 62.7090 | 42.4770 | C | 0 | 45.3550 | 59.7530 | 49.0560 | H | 0 | 36.3290 | 52.2690 | 42.7840 | H | 0 |
| 45.6470 | 63.5250 | 41.6390 | O | 0 | 46.7760 | 59.2620 | 48.2080 | H | 0 | 35.2310 | 52.6690 | 41.0920 | C | 0 |
| 43.7510 | 62.9420 | 42.7750 | N | 0 | 47.0390 | 59.2260 | 50.2500 | C | 0 | 36.1240 | 52.4400 | 40.5110 | H | 0 |
| 43.3600 | 62.2810 | 43.4310 | H | 0 | 46.4160 | 59.3600 | 51.1340 | H | 0 | 34.6070 | 51.7770 | 41.1500 | H | 0 |
| 42.8450 | 63.8330 | 42.0390 | C | 0 | 47.0160 | 58.1410 | 50.1440 | H | 0 | 34.5400 | 53.3930 | 40.6590 | H | 0 |
| 43.1680 | 63.7560 | 41.0000 | H | 0 | 48.4980 | 59.7560 | 50.3910 | C | 0 | 36.4400 | 54.4100 | 42.4310 | C | 0 |
| 41.3620 | 63.5440 | 42.1430 | C | 0 | 49.0020 | 59.8160 | 49.4260 | H | 0 | 36.7960 | 54.6530 | 43.4330 | H | 0 |
| 40.9590 | 64.2080 | 42.9070 | H | 0 | 48.3230 | 60.7630 | 50.7690 | H | 0 | 37.3350 | 54.3820 | 41.8090 | H | 0 |
| 40.5340 | 64.0070 | 40.9350 | C | 0 | 49.3210 | 58.9700 | 51.3110 | N | 0 | 35.7580 | 55.1930 | 42.1000 | H | 0 |
| 39.4610 | 63.9240 | 41.1090 | H | 0 | 49.2820 | 58.0250 | 50.9560 | H | 0 | 33.4120 | 52.2730 | 43.4630 | C | 0 |
| 40.9620 | 65.0090 | 40.9120 | H | 0 | 50.2440 | 59.3380 | 51.4910 | H | 0 | 33.4210 | 51.6110 | 44.4910 | O | 0 |
| 40.8180 | 63.4750 | 40.0270 | H | 0 | 48.9120 | 58.9180 | 52.2330 | H | 0 | 32.5050 | 52.2130 | 42.4890 | N | 0 |
| 40.9290 | 62.1150 | 42.4800 | C | 0 | 44.3720 | 62.3070 | 48.3310 | C | 0 | 32.6240 | 52.9370 | 41.7950 | H | 0 |
| 41.2850 | 61.3430 | 41.7980 | H | 0 | 44.0810 | 62.2210 | 49.5260 | O | 0 | 31.4620 | 51.2060 | 42.2230 | C | 0 |
| 41.1910 | 61.9310 | 43.5230 | H | 0 | 43.3650 | 62.5130 | 47.4580 | N | 0 | 31.9040 | 50.3530 | 42.7370 | H | 0 |
| 39.8410 | 62.0590 | 42.4580 | H | 0 | 43.6010 | 62.6860 | 46.4910 | H | 0 | 30.1580 | 51.6490 | 42.8510 | C | 0 |
| 43.2530 | 65.2860 | 42.4130 | C | 0 | 42.0090 | 62.8050 | 47.7320 | C | 0 | 30.3330 | 51.6420 | 43.9270 | H | 0 |
| 43.5390 | 65.6040 | 43.5660 | O | 0 | 41.9240 | 63.5380 | 48.5340 | H | 0 | 29.9910 | 52.6610 | 42.4820 | H | 0 |
| 43.2750 | 66.1430 | 41.3820 | N | 0 | 41.3890 | 63.3480 | 46.4300 | C | 0 | 29.0010 | 50.8070 | 42.3640 | C | 0 |
| 43.1510 | 65.6950 | 40.4860 | H | 0 | 41.5440 | 62.6770 | 45.5850 | H | 0 | 28.8810 | 49.4360 | 42.3720 | N | 0 |
| 43.6310 | 67.5580 | 41.4540 | C | 0 | 39.8750 | 63.6080 | 46.7020 | C | 0 | 27.6390 | 49.1840 | 41.8920 | C | 0 |
| 43.9150 | 67.8240 | 40.4360 | H | 0 | 39.6490 | 64.1030 | 47.6470 | H | 0 | 27.1500 | 48.2430 | 41.6910 | H | 0 |
| 42.4440 | 68.3660 | 42.0050 | C | 0 | 39.3640 | 64.1720 | 45.9210 | H | 0 | 26.9750 | 50.3410 | 41.5880 | N | 0 |
| 42.2590 | 68.1050 | 43.0470 | H | 0 | 39.3270 | 62.6660 | 46.7410 | H | 0 | 26.0310 | 50.3890 | 41.2330 | H | 0 |
| 42.8070 | 69.3930 | 41.9760 | H | 0 | 41.9430 | 64.5950 | 46.2030 | O | 0 | 27.8860 | 51.3780 | 41.8600 | C | 0 |
| 41.2290 | 68.1870 | 41.0670 | C | 0 | 42.7620 | 64.3900 | 45.7450 | H | 0 | 27.7250 | 52.4440 | 41.7990 | H | 0 |
| 41.6650 | 68.3930 | 40.0900 | H | 0 | 41.2210 | 61.5050 | 47.9870 | C | 0 | 31.3920 | 50.8640 | 40.7280 | C | 0 |
| 40.7350 | 67.2150 | 41.0920 | H | 0 | 41.2030 | 60.6170 | 47.1870 | O | 0 | 31.2930 | 51.6910 | 39.8480 | O | 0 |
| 40.1810 | 69.3130 | 41.3310 | C | 0 | 40.4910 | 61.3050 | 49.1310 | N | 0 | 31.4230 | 49.5330 | 40.3980 | N | 0 |
| 40.6980 | 70.2710 | 41.3860 | H | 0 | 40.4950 | 62.2390 | 50.2510 | C | 0 | 31.4190 | 48.8620 | 41.1530 | H | 0 |
| 39.4790 | 69.1930 | 40.5060 | H | 0 | 39.6740 | 62.9540 | 50.1960 | H | 0 | 31.2630 | 49.0250 | 39.0170 | C | 0 |
| 39.5620 | 69.0100 | 42.7420 | C | 0 | 41.4010 | 62.8080 | 50.4630 | H | 0 | 31.2070 | 49.8050 | 38.2580 | H | 0 |
| 39.3580 | 67.9390 | 42.7690 | H | 0 | 40.2010 | 61.3770 | 51.4820 | C | 0 | 32.4680 | 48.2000 | 38.6740 | C | 0 |
| 40.2300 | 69.4090 | 43.5050 | H | 0 | 39.6810 | 61.9430 | 52.2550 | H | 0 | 32.4660 | 47.3330 | 39.3340 | H | 0 |
| 38.3240 | 69.6770 | 42.9140 | N | 0 | 41.0750 | 60.9020 | 51.9280 | H | 0 | 32.3480 | 47.8560 | 37.6470 | H | 0 |
| 38.4370 | 70.6780 | 42.8440 | H | 0 | 39.2930 | 60.3410 | 50.9100 | C | 0 | 33.8680 | 48.7730 | 38.7780 | C | 0 |
| 37.6020 | 69.2840 | 42.3270 | H | 0 | 38.2890 | 60.7610 | 50.9790 | H | 0 | 34.3310 | 49.4960 | 37.6360 | C | 0 |
| 37.9400 | 69.4940 | 43.8310 | H | 0 | 39.3820 | 59.4860 | 51.5800 | H | 0 | 33.7520 | 49.4420 | 36.7260 | H | 0 |
| 44.9310 | 67.8940 | 42.2390 | C | 0 | 39.7630 | 60.1170 | 49.4450 | C | 0 | 35.6760 | 49.9390 | 37.6160 | C | 0 |
| 44.9870 | 68.8690 | 43.0280 | O | 0 | 40.4490 | 59.2770 | 49.3380 | H | 0 | 36.1480 | 50.3580 | 36.7400 | H | 0 |
| 45.9000 | 67.0120 | 42.0110 | N | 0 | 38.4850 | 59.9380 | 48.5250 | C | 0 | 36.4510 | 49.8810 | 38.7720 | C | 0 |
| 45.6860 | 66.2540 | 41.3790 | H | 0 | 37.6630 | 60.8020 | 48.4880 | O | 0 | 37.4770 | 50.2200 | 38.7870 | H | 0 |
| 47.2200 | 66.9820 | 42.6200 | C | 0 | 38.3140 | 58.7220 | 47.9810 | N | 0 | 35.9450 | 49.2540 | 39.9170 | C | 0 |

|         |         |         |   |   |         |         |         |   |   |         |         |         |   |   |
|---------|---------|---------|---|---|---------|---------|---------|---|---|---------|---------|---------|---|---|
| 36.5930 | 49.0790 | 40.7630 | H | 0 | 28.3880 | 55.4490 | 29.8910 | H | 0 | 34.9950 | 63.5660 | 48.4900 | O | 0 |
| 34.6740 | 48.6500 | 39.9180 | C | 0 | 28.4560 | 54.5850 | 31.7850 | C | 0 | 33.4250 | 61.6780 | 47.7260 | C | 0 |
| 34.2990 | 48.0400 | 40.7260 | H | 0 | 29.4610 | 54.9270 | 31.9790 | H | 0 | 32.2080 | 62.0270 | 47.9170 | O | 0 |
| 29.8690 | 48.3950 | 38.8180 | C | 0 | 29.9910 | 52.1560 | 35.5940 | C | 0 | 34.1480 | 60.7700 | 48.4540 | N | 0 |
| 29.6680 | 47.2440 | 39.2190 | O | 0 | 29.5560 | 51.6400 | 36.6730 | O | 0 | 35.0290 | 60.6330 | 47.9790 | H | 0 |
| 28.8980 | 49.2190 | 38.4440 | N | 0 | 31.2510 | 52.5590 | 35.5860 | N | 0 | 33.6130 | 60.0500 | 49.5810 | C | 0 |
| 29.1950 | 50.1500 | 38.1880 | H | 0 | 31.6890 | 52.8620 | 34.7280 | H | 0 | 32.6140 | 59.8100 | 49.2190 | H | 0 |
| 27.5130 | 48.8530 | 38.5080 | C | 0 | 32.0880 | 52.5960 | 36.7380 | C | 0 | 34.3420 | 58.7770 | 49.8860 | C | 0 |
| 27.2510 | 48.4930 | 39.5030 | H | 0 | 31.8230 | 51.7920 | 37.4240 | H | 0 | 33.5700 | 58.1960 | 50.3900 | H | 0 |
| 26.7460 | 50.1400 | 38.2350 | C | 0 | 33.1050 | 52.3200 | 36.4620 | H | 0 | 34.5870 | 58.2760 | 48.9490 | H | 0 |
| 27.2700 | 50.9590 | 38.7260 | H | 0 | 32.1270 | 53.9800 | 37.4320 | C | 0 | 35.6390 | 58.7710 | 50.7960 | C | 0 |
| 26.7810 | 50.3730 | 37.1700 | H | 0 | 32.9890 | 54.7460 | 36.9930 | O | 0 | 36.4820 | 59.0890 | 50.1820 | H | 0 |
| 25.2680 | 50.0370 | 38.7750 | C | 0 | 31.2310 | 54.2470 | 38.4140 | N | 0 | 35.5070 | 59.5110 | 51.5840 | H | 0 |
| 24.4240 | 49.4670 | 38.0620 | O | 0 | 30.6600 | 53.4500 | 38.6580 | H | 0 | 35.8830 | 57.3110 | 51.2310 | C | 0 |
| 24.9640 | 50.4850 | 39.8690 | O | 0 | 30.9730 | 55.5110 | 39.0420 | C | 0 | 35.0510 | 56.9330 | 51.8250 | H | 0 |
| 27.0910 | 47.7700 | 37.4590 | C | 0 | 30.7910 | 56.3050 | 38.3180 | H | 0 | 35.9630 | 56.6980 | 50.3340 | H | 0 |
| 27.6560 | 47.6220 | 36.4380 | O | 0 | 29.6840 | 55.3590 | 39.8290 | C | 0 | 37.0890 | 56.9950 | 52.0910 | N | 0 |
| 26.1490 | 46.9380 | 37.8380 | N | 0 | 29.8000 | 54.5100 | 40.5020 | H | 0 | 37.0300 | 56.9860 | 53.0990 | H | 0 |
| 25.7750 | 47.0500 | 38.7690 | H | 0 | 29.7140 | 56.3530 | 40.2770 | H | 0 | 38.2950 | 56.7550 | 51.6210 | C | 0 |
| 25.4130 | 45.9460 | 36.9360 | C | 0 | 28.5100 | 55.2250 | 38.9040 | C | 0 | 38.6120 | 56.4980 | 50.3810 | N | 0 |
| 26.1660 | 45.3000 | 36.4850 | H | 0 | 28.1290 | 53.9890 | 38.4170 | C | 0 | 37.9570 | 56.5590 | 49.6150 | H | 0 |
| 24.3430 | 45.1890 | 37.6760 | C | 0 | 28.5920 | 53.0770 | 38.7640 | H | 0 | 39.6130 | 56.5030 | 50.2450 | H | 0 |
| 23.6340 | 45.8490 | 38.1770 | H | 0 | 26.9830 | 53.8500 | 37.5670 | C | 0 | 39.3280 | 56.7620 | 52.4040 | N | 0 |
| 23.7710 | 44.6870 | 36.8960 | H | 0 | 26.6780 | 52.8730 | 37.2250 | H | 0 | 39.1890 | 56.8030 | 53.4030 | H | 0 |
| 24.8470 | 44.0510 | 38.6810 | C | 0 | 26.3180 | 54.9710 | 37.0860 | C | 0 | 40.1980 | 56.4480 | 51.9980 | H | 0 |
| 25.6360 | 43.5160 | 38.1520 | H | 0 | 25.3110 | 54.8080 | 36.1400 | O | 0 | 33.2410 | 60.8890 | 50.7790 | C | 0 |
| 25.2900 | 44.5320 | 39.5540 | H | 0 | 24.9290 | 55.6110 | 35.7780 | H | 0 | 32.5480 | 60.3410 | 51.6430 | O | 0 |
| 23.7200 | 43.0790 | 39.0090 | C | 0 | 26.7180 | 56.2660 | 37.6050 | C | 0 | 33.5350 | 62.1490 | 50.8250 | N | 0 |
| 22.8400 | 43.6320 | 39.3370 | H | 0 | 26.0160 | 57.0630 | 37.4110 | H | 0 | 34.0660 | 62.5040 | 50.0440 | H | 0 |
| 23.3770 | 42.6440 | 38.0710 | H | 0 | 27.8160 | 56.3910 | 38.4800 | C | 0 | 33.1320 | 63.1750 | 51.8050 | C | 0 |
| 24.0930 | 42.0970 | 39.9610 | N | 0 | 28.0610 | 57.3830 | 38.8300 | H | 0 | 33.0540 | 62.7050 | 52.7850 | H | 0 |
| 24.6150 | 41.3270 | 39.5680 | H | 0 | 32.0770 | 55.8450 | 40.0830 | C | 0 | 34.1870 | 64.3350 | 51.9050 | C | 0 |
| 24.2490 | 42.2600 | 41.2710 | C | 0 | 32.4340 | 55.1020 | 40.9600 | O | 0 | 34.3390 | 64.7560 | 50.9110 | H | 0 |
| 23.8660 | 43.3740 | 41.9220 | N | 0 | 32.7210 | 56.9920 | 39.9150 | N | 0 | 33.7400 | 65.0280 | 52.6190 | H | 0 |
| 23.4100 | 44.1090 | 41.4000 | H | 0 | 32.5720 | 57.4770 | 39.0420 | H | 0 | 35.5130 | 64.0920 | 52.5160 | C | 0 |
| 24.2460 | 43.6510 | 42.8160 | H | 0 | 33.7090 | 57.5890 | 40.8180 | C | 0 | 36.0010 | 65.0100 | 52.8420 | H | 0 |
| 24.7870 | 41.3470 | 42.0140 | N | 0 | 34.0380 | 56.8170 | 41.5130 | H | 0 | 35.2210 | 63.5730 | 53.4300 | H | 0 |
| 24.7620 | 40.4190 | 41.6180 | H | 0 | 34.9450 | 58.0640 | 40.1210 | C | 0 | 36.5750 | 63.1800 | 51.7750 | C | 0 |
| 24.9220 | 41.3510 | 43.0150 | H | 0 | 34.7970 | 59.0040 | 39.5900 | H | 0 | 37.5050 | 63.1220 | 52.3410 | H | 0 |
| 24.8080 | 46.5530 | 35.6820 | C | 0 | 36.0530 | 58.2790 | 41.1750 | C | 0 | 36.2390 | 62.1630 | 51.5750 | H | 0 |
| 24.7340 | 45.8460 | 34.6970 | O | 0 | 36.3350 | 57.2670 | 41.4690 | H | 0 | 36.9480 | 63.8110 | 50.4680 | N | 0 |
| 24.4830 | 47.8600 | 35.6260 | N | 0 | 36.9570 | 58.6330 | 40.6800 | H | 0 | 36.3940 | 63.6530 | 49.6380 | H | 0 |
| 24.5880 | 48.3760 | 36.4880 | H | 0 | 35.8270 | 58.8530 | 42.0740 | H | 0 | 37.8430 | 64.7630 | 50.2490 | C | 0 |
| 24.0740 | 48.5580 | 34.4590 | C | 0 | 35.4660 | 57.0160 | 39.0910 | C | 0 | 38.7480 | 65.1730 | 51.0660 | N | 0 |
| 23.3070 | 48.0370 | 33.8860 | H | 0 | 35.5010 | 56.0290 | 39.5510 | H | 0 | 38.8240 | 64.7420 | 51.9760 | H | 0 |
| 23.4170 | 49.8670 | 34.9520 | C | 0 | 34.7430 | 57.0990 | 38.2800 | H | 0 | 39.1210 | 66.0990 | 50.9120 | H | 0 |
| 22.6900 | 50.1860 | 34.2050 | H | 0 | 36.4630 | 57.2550 | 38.7200 | H | 0 | 37.7560 | 65.1940 | 49.0470 | N | 0 |
| 22.8280 | 49.6580 | 35.8460 | H | 0 | 33.1070 | 58.6530 | 41.6460 | C | 0 | 37.0150 | 65.0510 | 48.3750 | H | 0 |
| 24.3480 | 51.0080 | 35.1820 | C | 0 | 32.7360 | 59.6440 | 41.0130 | O | 0 | 38.2670 | 66.0360 | 48.8240 | H | 0 |
| 25.5090 | 51.0910 | 34.8300 | O | 0 | 33.0670 | 58.6520 | 42.9470 | N | 0 | 31.7640 | 63.7610 | 51.4630 | C | 0 |
| 23.8990 | 52.1350 | 35.7810 | N | 0 | 33.4160 | 57.8040 | 43.3690 | H | 0 | 30.9750 | 63.8980 | 52.4480 | O | 0 |
| 24.5640 | 52.8290 | 36.0910 | H | 0 | 32.4880 | 59.7710 | 43.7870 | C | 0 | 31.4560 | 64.1110 | 50.2150 | N | 0 |
| 22.9850 | 52.1420 | 36.2100 | H | 0 | 32.5090 | 60.6460 | 43.1380 | H | 0 | 32.2200 | 64.0470 | 49.5570 | H | 0 |
| 25.2840 | 48.8330 | 33.4670 | C | 0 | 31.0180 | 59.5920 | 44.2380 | C | 0 | 30.4080 | 65.0800 | 49.9440 | C | 0 |
| 24.9750 | 49.3250 | 32.3520 | O | 0 | 30.9420 | 58.8860 | 45.0650 | H | 0 | 29.7680 | 65.3000 | 50.7990 | H | 0 |
| 26.5370 | 48.5440 | 33.8360 | N | 0 | 30.8080 | 60.5000 | 44.8020 | H | 0 | 31.0250 | 66.4840 | 49.4990 | C | 0 |
| 26.7770 | 48.1750 | 34.7450 | H | 0 | 29.9530 | 59.3520 | 43.1020 | C | 0 | 30.1900 | 67.1520 | 49.2880 | H | 0 |
| 27.6660 | 48.8260 | 32.9300 | C | 0 | 30.3700 | 59.8110 | 42.2060 | H | 0 | 31.8650 | 67.0930 | 50.6490 | C | 0 |
| 28.2730 | 47.9220 | 32.9820 | H | 0 | 29.8090 | 57.8360 | 42.8930 | C | 0 | 32.6400 | 66.3270 | 50.6450 | H | 0 |
| 27.3390 | 48.9150 | 31.8950 | H | 0 | 30.7480 | 57.4290 | 42.5140 | H | 0 | 32.1990 | 68.0790 | 50.3270 | H | 0 |
| 28.5940 | 49.9820 | 33.2430 | C | 0 | 29.6180 | 57.2850 | 43.8140 | H | 0 | 31.3130 | 67.1340 | 51.5880 | H | 0 |
| 29.6930 | 49.9990 | 32.6750 | O | 0 | 29.1400 | 57.7130 | 42.0410 | H | 0 | 31.8590 | 66.3000 | 48.2850 | O | 0 |
| 28.2740 | 51.0020 | 34.0490 | N | 0 | 28.6480 | 60.0150 | 43.4220 | C | 0 | 32.1580 | 67.1950 | 48.1090 | H | 0 |
| 27.3740 | 50.9770 | 34.5070 | H | 0 | 27.9740 | 59.2240 | 43.0940 | H | 0 | 29.4480 | 64.7010 | 48.7810 | C | 0 |
| 29.0930 | 52.2230 | 34.2510 | C | 0 | 28.4540 | 60.1750 | 44.4820 | H | 0 | 28.4080 | 65.3030 | 48.6890 | O | 0 |
| 29.7250 | 52.2960 | 33.3650 | H | 0 | 28.5220 | 60.9790 | 42.9290 | H | 0 | 29.7810 | 63.5390 | 48.1170 | N | 0 |
| 28.3710 | 53.6310 | 34.1020 | C | 0 | 33.3700 | 60.2640 | 44.9890 | C | 0 | 30.5320 | 62.9530 | 48.4560 | H | 0 |
| 27.5180 | 53.8410 | 34.7490 | H | 0 | 34.0010 | 59.4630 | 45.7390 | O | 0 | 28.9830 | 62.9170 | 47.0010 | C | 0 |
| 29.1440 | 54.3660 | 34.3260 | H | 0 | 33.4620 | 61.6080 | 45.1750 | N | 0 | 29.1080 | 61.8410 | 46.8790 | H | 0 |
| 27.7820 | 53.8150 | 32.7550 | C | 0 | 33.1750 | 62.2420 | 44.4430 | H | 0 | 27.9550 | 63.1150 | 47.3060 | H | 0 |
| 26.4570 | 53.3530 | 32.4740 | C | 0 | 34.0660 | 62.1930 | 46.4140 | C | 0 | 29.2260 | 63.4720 | 45.6080 | C | 0 |
| 25.9180 | 52.7480 | 33.1880 | H | 0 | 35.0730 | 61.7770 | 46.3890 | H | 0 | 28.3790 | 63.2680 | 44.7210 | O | 0 |
| 25.9130 | 53.4690 | 31.2050 | C | 0 | 34.1410 | 63.7030 | 46.2430 | C | 0 | 30.2610 | 64.1760 | 45.3120 | N | 0 |
| 24.9090 | 53.1400 | 30.9800 | H | 0 | 34.6340 | 63.8740 | 45.2860 | H | 0 | 30.9360 | 64.2740 | 46.0570 | H | 0 |
| 26.6070 | 54.2750 | 30.2900 | C | 0 | 33.1560 | 64.1650 | 46.3090 | H | 0 | 30.6540 | 64.6560 | 44.0250 | C | 0 |
| 26.1380 | 54.4520 | 29.3330 | H | 0 | 34.9680 | 64.2190 | 47.4390 | C | 0 | 29.8900 | 65.3130 | 43.6080 | H | 0 |
| 27.8660 | 54.8030 | 30.5810 | C | 0 | 35.6670 | 65.2850 | 47.4010 | O | 0 | 31.8950 | 65.5550 | 44.1330 | C | 0 |



|         |         |         |   |   |         |         |         |   |   |         |         |         |   |   |
|---------|---------|---------|---|---|---------|---------|---------|---|---|---------|---------|---------|---|---|
| 31.7220 | 66.2090 | 44.9880 | H | 0 | 32.2610 | 55.7350 | 31.7490 | C | 0 | 26.8210 | 47.7550 | 21.8380 | C | 0 |
| 32.7780 | 65.0000 | 44.4500 | H | 0 | 31.5560 | 56.2130 | 31.0690 | H | 0 | 25.9050 | 48.1980 | 20.9480 | O | 0 |
| 32.2290 | 66.4410 | 42.8860 | C | 0 | 33.7020 | 55.9880 | 31.3330 | C | 0 | 25.3240 | 47.4490 | 20.7990 | H | 0 |
| 32.3530 | 65.7730 | 42.0340 | H | 0 | 34.3580 | 55.4110 | 31.9850 | H | 0 | 26.4610 | 46.6310 | 22.6090 | C | 0 |
| 31.5030 | 67.2040 | 42.6060 | H | 0 | 33.8000 | 55.6620 | 30.2980 | H | 0 | 25.4660 | 46.2380 | 22.4610 | H | 0 |
| 33.6390 | 67.0630 | 42.9910 | C | 0 | 34.1810 | 57.4800 | 31.1980 | C | 0 | 27.3410 | 46.1090 | 23.5690 | C | 0 |
| 34.4860 | 66.5790 | 43.7720 | O | 0 | 34.1450 | 57.8820 | 32.2110 | H | 0 | 26.9550 | 45.3540 | 24.2390 | H | 0 |
| 33.9440 | 68.1030 | 42.2280 | N | 0 | 35.2080 | 57.4790 | 30.8330 | H | 0 | 28.2640 | 47.4080 | 26.5530 | C | 0 |
| 34.9340 | 68.3000 | 42.2080 | H | 0 | 33.3600 | 58.3530 | 30.2800 | C | 0 | 27.5930 | 46.4670 | 27.0370 | O | 0 |
| 33.3020 | 68.4490 | 41.5300 | H | 0 | 32.8690 | 57.9980 | 29.2090 | O | 0 | 27.8200 | 48.6250 | 26.5180 | N | 0 |
| 30.9500 | 63.5310 | 43.0230 | C | 0 | 33.0670 | 59.5840 | 30.5970 | N | 0 | 28.4760 | 49.2710 | 26.1030 | H | 0 |
| 32.0080 | 62.9370 | 43.1430 | O | 0 | 32.3840 | 60.1440 | 30.1080 | H | 0 | 26.5160 | 49.1690 | 26.9090 | C | 0 |
| 30.1780 | 63.3240 | 41.9690 | N | 0 | 33.3260 | 59.9360 | 31.5080 | H | 0 | 25.9460 | 48.3490 | 27.3450 | H | 0 |
| 29.3260 | 63.8350 | 41.7860 | H | 0 | 31.9050 | 54.2240 | 31.5830 | C | 0 | 26.6370 | 50.2370 | 27.9680 | C | 0 |
| 30.5850 | 62.5240 | 40.8420 | C | 0 | 31.7800 | 53.5690 | 32.6190 | O | 0 | 27.3410 | 51.0040 | 27.6420 | H | 0 |
| 30.7760 | 61.4970 | 41.1550 | H | 0 | 31.6280 | 53.6480 | 30.3740 | N | 0 | 25.2680 | 50.8750 | 28.2580 | C | 0 |
| 29.2100 | 62.3000 | 40.0610 | C | 0 | 31.2990 | 54.3310 | 29.1110 | C | 0 | 25.0900 | 51.5340 | 27.4090 | H | 0 |
| 28.4510 | 62.1600 | 40.8310 | H | 0 | 32.1880 | 54.5790 | 28.5310 | H | 0 | 24.5120 | 50.1390 | 28.5360 | H | 0 |
| 28.9830 | 63.1860 | 39.4700 | H | 0 | 30.8210 | 55.2810 | 29.3510 | H | 0 | 25.1370 | 51.6410 | 29.0230 | H | 0 |
| 29.1350 | 61.1150 | 39.0100 | C | 0 | 30.4060 | 53.3650 | 28.2970 | C | 0 | 27.2660 | 49.7590 | 29.3680 | C | 0 |
| 28.1320 | 61.2310 | 38.6000 | H | 0 | 30.8930 | 53.2200 | 27.3330 | H | 0 | 27.6260 | 50.6120 | 29.9430 | H | 0 |
| 30.0410 | 61.3610 | 37.8390 | C | 0 | 29.3730 | 53.7110 | 28.2500 | H | 0 | 26.5310 | 49.2070 | 29.9550 | H | 0 |
| 31.0980 | 61.3120 | 38.1000 | H | 0 | 30.3350 | 52.0600 | 29.1050 | C | 0 | 28.2070 | 49.2140 | 29.2950 | H | 0 |
| 29.7550 | 60.6510 | 37.0630 | H | 0 | 30.7740 | 51.1930 | 28.6110 | H | 0 | 25.7920 | 49.6670 | 25.6810 | C | 0 |
| 29.7430 | 62.3580 | 37.5150 | H | 0 | 29.2930 | 51.9670 | 29.4110 | H | 0 | 26.4680 | 50.1190 | 24.7650 | O | 0 |
| 29.4300 | 59.6920 | 39.5890 | C | 0 | 31.2680 | 52.2230 | 30.3070 | C | 0 | 24.4560 | 49.5980 | 25.6110 | N | 0 |
| 28.6390 | 59.5300 | 40.3210 | H | 0 | 30.5990 | 51.9410 | 31.1200 | H | 0 | 24.0650 | 49.2280 | 26.4650 | H | 0 |
| 29.3290 | 58.9580 | 38.7900 | H | 0 | 32.4620 | 51.2440 | 30.4030 | C | 0 | 23.5630 | 50.2000 | 24.5990 | C | 0 |
| 30.4500 | 59.6280 | 39.9690 | H | 0 | 33.3010 | 51.3280 | 29.4740 | O | 0 | 24.2130 | 51.0400 | 24.3510 | H | 0 |
| 31.6890 | 62.9380 | 39.9270 | C | 0 | 32.4680 | 50.3430 | 31.3330 | N | 0 | 23.5480 | 49.3690 | 23.3370 | C | 0 |
| 31.5300 | 63.8870 | 39.1310 | O | 0 | 31.6280 | 50.2630 | 31.8880 | H | 0 | 23.4900 | 50.0200 | 22.4640 | H | 0 |
| 32.9220 | 62.4150 | 40.1920 | N | 0 | 33.5920 | 49.3280 | 31.5130 | C | 0 | 24.5020 | 48.8470 | 23.2600 | H | 0 |
| 32.9330 | 61.6450 | 40.8460 | H | 0 | 34.4950 | 49.8050 | 31.1330 | H | 0 | 22.5000 | 48.3220 | 23.2830 | C | 0 |
| 34.1150 | 62.7650 | 39.4990 | C | 0 | 33.9410 | 49.1070 | 33.0170 | C | 0 | 21.8300 | 48.0790 | 24.2240 | O | 0 |
| 34.1590 | 63.8440 | 39.3540 | H | 0 | 34.9170 | 48.6240 | 33.0670 | H | 0 | 22.4860 | 47.5210 | 22.2680 | N | 0 |
| 35.4190 | 62.4160 | 40.2600 | C | 0 | 34.1060 | 50.0140 | 33.5990 | H | 0 | 21.8390 | 46.7600 | 22.4170 | H | 0 |
| 35.1930 | 61.4340 | 40.6770 | H | 0 | 32.8640 | 48.3340 | 33.7520 | C | 0 | 23.0750 | 47.5720 | 21.4500 | H | 0 |
| 36.5700 | 62.4610 | 39.3170 | C | 0 | 31.8730 | 49.0600 | 34.5000 | C | 0 | 22.2200 | 50.8560 | 25.0310 | C | 0 |
| 36.3920 | 61.6360 | 38.6270 | H | 0 | 31.8550 | 50.1390 | 34.5430 | H | 0 | 21.5820 | 51.5290 | 24.2400 | O | 0 |
| 36.4230 | 63.3910 | 38.7690 | H | 0 | 30.8660 | 48.2740 | 35.1130 | C | 0 | 21.8280 | 50.7020 | 26.2530 | N | 0 |
| 37.4970 | 62.3220 | 39.8730 | H | 0 | 30.1420 | 48.7560 | 35.7520 | H | 0 | 22.2560 | 49.9670 | 26.7980 | H | 0 |
| 35.6410 | 63.3830 | 41.5080 | C | 0 | 30.7980 | 46.9080 | 35.1580 | C | 0 | 20.7360 | 51.4440 | 26.9010 | C | 0 |
| 36.0390 | 64.3490 | 41.1960 | H | 0 | 29.9970 | 46.4240 | 35.6960 | H | 0 | 19.8570 | 51.3600 | 26.2630 | H | 0 |
| 34.7110 | 63.5600 | 42.0470 | H | 0 | 31.8850 | 46.1980 | 34.6400 | C | 0 | 20.3430 | 50.7180 | 28.1970 | C | 0 |
| 36.6200 | 62.8270 | 42.6070 | C | 0 | 31.7910 | 45.1230 | 34.6850 | H | 0 | 19.3300 | 50.9430 | 28.5330 | H | 0 |
| 37.6860 | 62.9850 | 42.4420 | H | 0 | 32.8590 | 46.8940 | 33.8720 | C | 0 | 20.3070 | 49.6600 | 27.9370 | H | 0 |
| 36.4950 | 63.3560 | 43.5520 | H | 0 | 33.6170 | 46.3290 | 33.3500 | H | 0 | 21.2620 | 50.8730 | 29.3900 | C | 0 |
| 36.4230 | 61.7610 | 42.7250 | H | 0 | 33.4780 | 48.0090 | 30.6840 | C | 0 | 22.3060 | 50.0250 | 29.6810 | C | 0 |
| 34.0430 | 62.2690 | 38.0380 | C | 0 | 34.3350 | 47.1470 | 30.7790 | O | 0 | 22.5860 | 49.1400 | 29.1300 | H | 0 |
| 34.2440 | 62.9790 | 37.0680 | O | 0 | 32.4190 | 47.9380 | 29.8480 | N | 0 | 22.9820 | 50.5710 | 30.7030 | N | 0 |
| 33.6200 | 61.0130 | 37.8930 | N | 0 | 31.9000 | 48.8010 | 29.7610 | H | 0 | 23.7160 | 50.1000 | 31.2130 | H | 0 |
| 33.2810 | 60.4410 | 38.6540 | H | 0 | 31.9780 | 46.8730 | 29.0030 | C | 0 | 22.4520 | 51.7320 | 31.1990 | C | 0 |
| 33.5410 | 60.4050 | 36.6050 | C | 0 | 32.9030 | 46.4730 | 28.5880 | H | 0 | 22.7710 | 52.4570 | 32.3200 | C | 0 |
| 33.1200 | 61.1750 | 35.9580 | H | 0 | 31.0920 | 45.8930 | 29.7550 | C | 0 | 23.7020 | 52.2000 | 32.8030 | H | 0 |
| 35.0010 | 60.0640 | 36.2830 | C | 0 | 30.7200 | 45.1560 | 29.0430 | H | 0 | 21.9740 | 53.5100 | 32.6700 | C | 0 |
| 35.5640 | 60.9970 | 36.2970 | H | 0 | 31.8570 | 45.0840 | 30.7650 | C | 0 | 22.1410 | 54.1720 | 33.5070 | H | 0 |
| 35.3450 | 59.4810 | 37.1370 | H | 0 | 32.7230 | 44.5830 | 30.3320 | H | 0 | 20.9490 | 53.8590 | 31.8320 | C | 0 |
| 35.3030 | 59.3810 | 34.9640 | C | 0 | 32.2070 | 45.6040 | 31.6560 | H | 0 | 20.3680 | 54.7270 | 32.1060 | H | 0 |
| 36.3480 | 59.2780 | 34.6740 | H | 0 | 31.1750 | 44.3610 | 31.2120 | H | 0 | 20.6110 | 53.1100 | 30.6910 | C | 0 |
| 34.8170 | 58.4060 | 35.0030 | H | 0 | 29.8920 | 46.6200 | 30.4240 | C | 0 | 19.7610 | 53.4640 | 30.1260 | H | 0 |
| 34.7950 | 60.2120 | 33.8050 | C | 0 | 29.1820 | 46.9180 | 29.6520 | H | 0 | 21.3300 | 51.9560 | 30.3900 | C | 0 |
| 33.5990 | 60.1610 | 33.5370 | O | 0 | 29.3380 | 45.8230 | 30.9210 | H | 0 | 20.9530 | 52.9260 | 27.0330 | C | 0 |
| 35.5790 | 61.0730 | 33.2890 | O | 0 | 30.2090 | 47.4800 | 31.0140 | H | 0 | 19.9960 | 53.6300 | 26.8550 | O | 0 |
| 32.6270 | 59.1780 | 36.5990 | C | 0 | 31.0880 | 47.5080 | 27.8600 | C | 0 | 22.1690 | 53.3480 | 27.3910 | N | 0 |
| 32.2670 | 58.5640 | 37.6200 | O | 0 | 30.9780 | 48.6590 | 27.8240 | O | 0 | 22.8060 | 52.6420 | 27.7320 | H | 0 |
| 32.0650 | 58.8740 | 35.4240 | N | 0 | 30.6150 | 46.7170 | 26.8950 | N | 0 | 22.5280 | 54.8070 | 27.3030 | C | 0 |
| 32.3030 | 59.5010 | 34.6690 | H | 0 | 30.8770 | 45.7410 | 26.9140 | H | 0 | 21.8470 | 55.1990 | 26.5470 | H | 0 |
| 31.4230 | 57.6060 | 34.9770 | C | 0 | 29.6240 | 47.2290 | 25.9380 | C | 0 | 22.4310 | 55.4180 | 28.7220 | C | 0 |
| 32.0060 | 56.7590 | 35.3380 | H | 0 | 29.9480 | 48.1690 | 25.4910 | H | 0 | 22.7800 | 56.4490 | 28.6740 | H | 0 |
| 29.9780 | 57.4550 | 35.4950 | C | 0 | 29.5600 | 46.2560 | 24.8030 | C | 0 | 21.3850 | 55.4270 | 29.0310 | H | 0 |
| 29.4430 | 56.6630 | 34.9720 | H | 0 | 30.4910 | 46.3270 | 24.2410 | H | 0 | 23.1050 | 54.8460 | 29.3600 | H | 0 |
| 29.9470 | 57.2780 | 36.5700 | H | 0 | 29.1920 | 45.2880 | 25.1440 | H | 0 | 23.9210 | 54.9580 | 26.7310 | C | 0 |
| 29.4710 | 58.4060 | 35.3320 | H | 0 | 28.5950 | 46.7010 | 23.7240 | C | 0 | 24.8380 | 54.1240 | 26.7590 | O | 0 |
| 31.5040 | 57.3430 | 33.4690 | C | 0 | 28.9830 | 47.7800 | 22.8840 | C | 0 | 24.1300 | 56.0730 | 26.0690 | N | 0 |
| 31.0760 | 58.1080 | 32.6070 | O | 0 | 29.9950 | 48.1480 | 22.9640 | H | 0 | 23.3820 | 56.7510 | 26.0520 | H | 0 |
| 32.0840 | 56.1920 | 33.0980 | N | 0 | 28.1020 | 48.3130 | 21.9500 | C | 0 | 25.4500 | 56.4930 | 25.5440 | C | 0 |
| 32.4570 | 55.5690 | 33.8000 | H | 0 | 28.4890 | 49.1750 | 21.4270 | H | 0 | 25.8370 | 55.6290 | 25.0040 | H | 0 |

|         |         |         |   |   |         |         |         |   |   |         |         |         |   |   |
|---------|---------|---------|---|---|---------|---------|---------|---|---|---------|---------|---------|---|---|
| 25.4730 | 57.7660 | 24.5720 | C | 0 | 32.3240 | 64.5850 | 33.7960 | H | 0 | 21.3990 | 57.1360 | 33.4660 | C | 0 |
| 24.8070 | 57.5350 | 23.7410 | H | 0 | 33.0330 | 66.1750 | 33.6090 | H | 0 | 20.7540 | 56.3280 | 33.8100 | H | 0 |
| 25.1050 | 58.6880 | 25.0220 | H | 0 | 33.0100 | 65.5740 | 35.6070 | N | 0 | 22.3890 | 56.7820 | 33.7540 | H | 0 |
| 26.8170 | 58.1020 | 23.9310 | C | 0 | 32.6170 | 66.2790 | 36.2150 | H | 0 | 21.5130 | 57.3430 | 31.9100 | C | 0 |
| 26.6090 | 58.9030 | 23.2220 | H | 0 | 33.0220 | 64.6860 | 36.0880 | H | 0 | 20.5180 | 57.4400 | 31.4760 | H | 0 |
| 27.4250 | 58.5550 | 24.7140 | H | 0 | 33.9640 | 65.8940 | 35.5260 | H | 0 | 22.1690 | 56.6030 | 31.4520 | H | 0 |
| 27.3690 | 56.8790 | 23.1580 | C | 0 | 26.9460 | 67.4270 | 33.3370 | C | 0 | 22.1630 | 58.7130 | 31.9210 | C | 0 |
| 27.9830 | 56.3140 | 23.8590 | H | 0 | 27.1640 | 68.1300 | 34.3450 | O | 0 | 23.2190 | 58.5380 | 31.7140 | H | 0 |
| 26.5090 | 56.3490 | 22.7500 | H | 0 | 25.8460 | 67.7360 | 32.6120 | N | 0 | 21.5730 | 59.4480 | 30.7510 | C | 0 |
| 28.3240 | 57.3360 | 21.9790 | C | 0 | 25.8200 | 67.1980 | 31.7580 | H | 0 | 20.4270 | 59.7860 | 30.7440 | O | 0 |
| 28.2140 | 56.5420 | 21.2400 | H | 0 | 24.8740 | 68.8280 | 32.9730 | C | 0 | 22.3580 | 59.5950 | 29.7220 | N | 0 |
| 27.9120 | 58.2390 | 21.5300 | H | 0 | 25.4010 | 69.7770 | 33.0730 | H | 0 | 23.3340 | 59.4800 | 29.9540 | H | 0 |
| 29.7840 | 57.4620 | 22.3440 | N | 0 | 23.9960 | 69.1130 | 31.6910 | C | 0 | 21.9390 | 60.0230 | 28.3740 | C | 0 |
| 29.9740 | 56.7090 | 22.9910 | H | 0 | 24.6830 | 69.3140 | 30.8690 | H | 0 | 21.0480 | 60.6370 | 28.5100 | H | 0 |
| 30.4310 | 57.5740 | 21.5770 | H | 0 | 23.4270 | 68.2240 | 31.4200 | H | 0 | 22.9660 | 60.7750 | 27.5430 | C | 0 |
| 29.8560 | 58.3510 | 22.8180 | H | 0 | 22.9800 | 70.2070 | 31.8620 | C | 0 | 23.8680 | 60.1760 | 27.4220 | H | 0 |
| 26.3780 | 56.7250 | 26.6930 | C | 0 | 22.4610 | 70.3890 | 30.9210 | H | 0 | 22.3540 | 61.1100 | 26.1960 | C | 0 |
| 27.4990 | 56.2170 | 26.6090 | O | 0 | 22.2300 | 69.9130 | 32.5960 | H | 0 | 21.5030 | 61.7660 | 26.3780 | H | 0 |
| 26.0310 | 57.6100 | 27.6500 | N | 0 | 23.5000 | 71.5990 | 32.3100 | C | 0 | 23.0370 | 61.6820 | 25.5680 | H | 0 |
| 25.0600 | 57.8850 | 27.6150 | H | 0 | 22.9370 | 72.3150 | 33.1850 | O | 0 | 22.0490 | 60.2170 | 25.6500 | H | 0 |
| 26.8950 | 58.2160 | 28.5800 | C | 0 | 24.6590 | 71.8710 | 31.9160 | O | 0 | 23.4170 | 62.0290 | 28.2760 | C | 0 |
| 27.5560 | 57.4570 | 28.9990 | H | 0 | 24.0800 | 68.4800 | 34.2700 | C | 0 | 22.5850 | 62.6680 | 28.5710 | H | 0 |
| 27.7720 | 59.3190 | 27.9500 | C | 0 | 23.8910 | 69.3800 | 35.1070 | O | 0 | 23.9380 | 61.6520 | 29.1560 | H | 0 |
| 28.5870 | 59.5800 | 28.6260 | H | 0 | 23.6420 | 67.1780 | 34.4230 | N | 0 | 23.9400 | 62.7190 | 27.6130 | H | 0 |
| 28.2590 | 59.0530 | 27.0120 | H | 0 | 23.8110 | 66.7280 | 33.5350 | H | 0 | 21.4630 | 58.7190 | 27.6540 | C | 0 |
| 26.9290 | 60.5990 | 27.6950 | C | 0 | 22.6480 | 66.6080 | 35.3340 | C | 0 | 22.2030 | 57.9790 | 27.0000 | O | 0 |
| 25.9880 | 60.5750 | 27.1460 | H | 0 | 22.5630 | 67.3870 | 36.0920 | H | 0 | 20.2260 | 58.2920 | 27.8870 | N | 0 |
| 26.5680 | 60.9990 | 28.6430 | H | 0 | 21.2810 | 66.4950 | 34.6300 | C | 0 | 19.6900 | 58.9980 | 28.3720 | H | 0 |
| 27.7560 | 61.7350 | 27.0410 | C | 0 | 21.3880 | 65.7450 | 33.8460 | H | 0 | 19.5810 | 57.1420 | 27.3580 | C | 0 |
| 28.7810 | 62.0920 | 27.6080 | O | 0 | 20.4940 | 66.2180 | 35.3310 | H | 0 | 20.2230 | 56.3030 | 27.6260 | H | 0 |
| 27.3690 | 62.2240 | 25.9880 | O | 0 | 20.8910 | 67.7220 | 33.8510 | C | 0 | 18.3310 | 56.8930 | 28.1160 | C | 0 |
| 26.2150 | 58.7870 | 29.8790 | C | 0 | 20.4450 | 68.7100 | 34.4280 | O | 0 | 17.5250 | 57.5830 | 27.8660 | H | 0 |
| 25.0440 | 59.0670 | 29.9140 | O | 0 | 20.7270 | 67.7780 | 32.5660 | N | 0 | 17.9310 | 55.9440 | 27.7590 | H | 0 |
| 27.0630 | 59.1930 | 30.8690 | N | 0 | 20.1480 | 68.5350 | 32.2320 | H | 0 | 18.4740 | 56.8240 | 29.6550 | C | 0 |
| 28.0600 | 59.1680 | 30.7110 | H | 0 | 20.9830 | 67.0280 | 31.9390 | H | 0 | 19.0830 | 55.9420 | 29.8520 | H | 0 |
| 26.5330 | 59.8810 | 32.0530 | C | 0 | 23.1610 | 65.4190 | 36.1990 | C | 0 | 18.9810 | 57.7360 | 29.9700 | H | 0 |
| 25.4750 | 59.6590 | 32.1900 | H | 0 | 22.3730 | 65.0350 | 37.1040 | O | 0 | 17.1540 | 56.7290 | 30.4320 | C | 0 |
| 27.1400 | 59.3290 | 33.3070 | C | 0 | 24.2960 | 64.8000 | 35.9070 | N | 0 | 17.0930 | 56.7450 | 31.6910 | O | 0 |
| 28.1890 | 59.6200 | 33.2500 | H | 0 | 24.8640 | 65.3170 | 35.2510 | H | 0 | 16.1210 | 56.4660 | 29.7570 | O | 0 |
| 26.5040 | 59.9160 | 34.6060 | C | 0 | 24.8640 | 63.7050 | 36.7370 | C | 0 | 19.3370 | 57.1360 | 25.8370 | C | 0 |
| 25.4630 | 59.6550 | 34.7990 | H | 0 | 25.7560 | 63.4430 | 36.1680 | H | 0 | 18.8670 | 58.1400 | 25.2770 | O | 0 |
| 27.0090 | 59.5790 | 35.5110 | H | 0 | 25.3460 | 64.1920 | 38.1270 | C | 0 | 19.1590 | 55.9250 | 25.2350 | N | 0 |
| 26.4610 | 61.0010 | 34.5120 | H | 0 | 24.5940 | 64.5550 | 38.8280 | H | 0 | 19.4690 | 55.0850 | 25.7020 | H | 0 |
| 27.0100 | 57.7270 | 33.4910 | C | 0 | 25.7830 | 63.2790 | 38.5300 | H | 0 | 18.5930 | 55.7180 | 23.8690 | C | 0 |
| 27.8090 | 57.1860 | 32.9850 | H | 0 | 26.5110 | 65.1910 | 38.0960 | C | 0 | 18.5520 | 56.6510 | 23.3070 | H | 0 |
| 27.1830 | 57.4990 | 34.5430 | H | 0 | 26.7300 | 65.9650 | 39.0620 | O | 0 | 19.3680 | 54.6880 | 23.0340 | C | 0 |
| 25.5250 | 57.2330 | 33.1700 | C | 0 | 27.3320 | 65.1650 | 37.1710 | O | 0 | 19.5580 | 53.7280 | 23.5130 | H | 0 |
| 25.3450 | 57.4570 | 32.1180 | H | 0 | 23.9380 | 62.4940 | 36.6570 | C | 0 | 18.6050 | 54.1860 | 21.7960 | C | 0 |
| 25.4400 | 56.1790 | 33.4340 | H | 0 | 23.7630 | 61.7070 | 37.5930 | O | 0 | 19.2060 | 53.5790 | 21.1190 | H | 0 |
| 24.7850 | 57.6350 | 33.8620 | H | 0 | 23.2890 | 62.2370 | 35.4850 | N | 0 | 17.6890 | 53.6260 | 21.9850 | H | 0 |
| 26.7080 | 61.4280 | 32.0130 | C | 0 | 23.5650 | 62.8520 | 34.7330 | H | 0 | 18.2410 | 55.0500 | 21.2400 | H | 0 |
| 27.7350 | 62.0660 | 32.0390 | O | 0 | 22.4570 | 60.9610 | 35.2590 | C | 0 | 20.7370 | 55.2480 | 22.5790 | C | 0 |
| 25.5540 | 62.0240 | 31.7230 | N | 0 | 22.9130 | 60.1000 | 35.7490 | H | 0 | 21.1230 | 54.5110 | 21.8740 | H | 0 |
| 24.7010 | 61.4870 | 31.6620 | H | 0 | 20.9450 | 61.3060 | 35.6380 | C | 0 | 20.6140 | 56.2080 | 22.0770 | H | 0 |
| 25.4430 | 63.5080 | 31.4420 | C | 0 | 20.3160 | 60.4340 | 35.4620 | H | 0 | 21.7870 | 55.5160 | 23.6650 | C | 0 |
| 25.7400 | 63.7700 | 30.4260 | H | 0 | 20.8780 | 61.7650 | 36.6240 | H | 0 | 22.7500 | 55.5770 | 23.1590 | H | 0 |
| 24.0070 | 63.8920 | 31.5650 | C | 0 | 20.4300 | 62.4370 | 34.7610 | C | 0 | 21.5970 | 56.3720 | 24.3120 | H | 0 |
| 23.4730 | 63.3140 | 30.8110 | H | 0 | 20.7300 | 63.3830 | 35.2120 | H | 0 | 21.7860 | 54.6080 | 24.2680 | H | 0 |
| 23.7380 | 63.7250 | 32.6080 | H | 0 | 20.8240 | 62.3670 | 33.7470 | H | 0 | 17.1020 | 55.2010 | 24.1070 | C | 0 |
| 23.7920 | 65.2470 | 31.2300 | O | 0 | 18.8810 | 62.4820 | 34.9000 | C | 0 | 16.8680 | 54.1540 | 24.7370 | O | 0 |
| 23.9130 | 65.2570 | 30.2770 | H | 0 | 18.3800 | 63.2190 | 34.2730 | H | 0 | 16.1070 | 55.9460 | 23.6430 | N | 0 |
| 26.1680 | 64.3790 | 32.4730 | C | 0 | 18.5230 | 61.5220 | 34.5270 | H | 0 | 16.1930 | 57.4000 | 23.3330 | C | 0 |
| 25.8700 | 64.3240 | 33.6580 | O | 0 | 18.5050 | 62.6720 | 36.3060 | N | 0 | 16.7390 | 57.5220 | 22.3980 | H | 0 |
| 27.1560 | 65.2030 | 32.1120 | N | 0 | 19.0070 | 63.3810 | 36.8210 | H | 0 | 16.7980 | 57.9270 | 24.0710 | H | 0 |
| 27.4150 | 65.1610 | 31.1370 | H | 0 | 17.3890 | 62.2830 | 36.8530 | C | 0 | 14.8270 | 58.0280 | 23.3240 | C | 0 |
| 27.8540 | 66.2230 | 32.9770 | C | 0 | 16.6460 | 61.4090 | 36.2970 | H | 0 | 14.5930 | 58.7690 | 22.5600 | H | 0 |
| 28.0010 | 65.7210 | 33.9340 | H | 0 | 16.8760 | 61.0060 | 35.4000 | H | 0 | 14.6730 | 58.5380 | 24.2750 | H | 0 |
| 29.1790 | 66.6980 | 32.3630 | C | 0 | 15.8450 | 61.0210 | 36.7750 | H | 0 | 13.9100 | 56.7980 | 23.1840 | C | 0 |
| 29.0470 | 66.7670 | 31.2830 | H | 0 | 17.0980 | 62.7320 | 38.0200 | N | 0 | 13.8540 | 56.5960 | 22.1140 | H | 0 |
| 29.3700 | 67.7440 | 32.6000 | H | 0 | 17.7780 | 63.3550 | 38.4300 | H | 0 | 12.9610 | 56.9940 | 23.6830 | H | 0 |
| 30.3860 | 65.7870 | 32.6600 | C | 0 | 16.1740 | 62.5820 | 38.4000 | H | 0 | 14.6800 | 55.6110 | 23.7770 | C | 0 |
| 30.2110 | 64.7120 | 32.6620 | H | 0 | 22.6020 | 60.4090 | 33.7980 | C | 0 | 14.5880 | 55.5620 | 24.8620 | H | 0 |
| 31.1160 | 66.0070 | 31.8810 | H | 0 | 23.4310 | 60.9640 | 33.1120 | O | 0 | 14.1020 | 54.3050 | 23.2160 | C | 0 |
| 30.9750 | 66.1740 | 34.0730 | C | 0 | 21.8990 | 59.3260 | 33.3230 | N | 0 | 13.1340 | 53.7660 | 23.7400 | O | 0 |
| 31.0300 | 67.2400 | 34.2960 | H | 0 | 21.1540 | 58.4590 | 34.1360 | C | 0 | 14.8180 | 53.8480 | 22.2320 | N | 0 |
| 30.3230 | 65.7990 | 34.8610 | H | 0 | 20.1230 | 58.8070 | 34.0680 | H | 0 | 15.5530 | 54.4100 | 21.8280 | H | 0 |
| 32.4090 | 65.5660 | 34.2630 | C | 0 | 21.5380 | 58.3950 | 35.1540 | H | 0 | 14.6610 | 52.5370 | 21.5720 | C | 0 |

|         |         |         |   |   |         |         |         |   |   |         |         |         |   |   |
|---------|---------|---------|---|---|---------|---------|---------|---|---|---------|---------|---------|---|---|
| 13.6530 | 52.6220 | 21.1650 | H | 0 | 7.8450  | 49.8160 | 25.0910 | H | 0 | 14.7440 | 46.7210 | 23.5460 | H | 0 |
| 15.6070 | 52.3530 | 20.4160 | C | 0 | 6.5390  | 50.8300 | 25.9080 | H | 0 | 13.7600 | 48.0410 | 23.1520 | H | 0 |
| 15.6490 | 53.2260 | 19.7640 | C | 0 | 8.5460  | 51.5760 | 25.7890 | C | 0 | 11.5440 | 47.0860 | 24.4160 | O | 0 |
| 16.6130 | 52.0810 | 20.7360 | H | 0 | 8.3290  | 52.3420 | 26.5340 | H | 0 | 11.0090 | 46.4120 | 24.8430 | H | 0 |
| 15.0380 | 51.3070 | 19.4370 | C | 0 | 9.6090  | 51.3400 | 25.7480 | H | 0 | 13.4480 | 44.7090 | 22.2140 | C | 0 |
| 14.2680 | 50.7230 | 19.9410 | H | 0 | 8.3690  | 52.2220 | 24.4110 | C | 0 | 13.5070 | 43.5340 | 22.7230 | O | 0 |
| 14.5520 | 51.8110 | 18.6020 | H | 0 | 8.4430  | 51.4370 | 23.6590 | H | 0 | 14.3310 | 45.1020 | 21.2820 | N | 0 |
| 16.2010 | 50.3180 | 19.0230 | C | 0 | 7.4250  | 52.7640 | 24.3540 | H | 0 | 14.4050 | 46.0530 | 20.9500 | H | 0 |
| 17.2800 | 50.6030 | 18.4560 | O | 0 | 9.5650  | 53.1070 | 24.0530 | C | 0 | 15.4950 | 44.1800 | 20.9040 | C | 0 |
| 15.9990 | 49.1320 | 19.2970 | O | 0 | 9.2460  | 53.8480 | 23.3210 | H | 0 | 15.5480 | 43.4620 | 21.7230 | H | 0 |
| 14.8070 | 51.2900 | 22.4810 | C | 0 | 9.7970  | 53.7450 | 24.9060 | H | 0 | 15.3230 | 43.5090 | 19.4910 | C | 0 |
| 14.0330 | 50.3340 | 22.3930 | O | 0 | 10.8340 | 52.3780 | 23.7520 | N | 0 | 15.3000 | 44.2030 | 18.6510 | H | 0 |
| 15.7530 | 51.4050 | 23.4290 | N | 0 | 11.1200 | 51.7150 | 24.4580 | H | 0 | 16.0050 | 42.6760 | 19.3170 | H | 0 |
| 16.1290 | 52.3410 | 23.4840 | H | 0 | 10.7040 | 51.8640 | 22.8930 | H | 0 | 13.9610 | 42.8930 | 19.4870 | C | 0 |
| 16.3060 | 50.3630 | 24.2580 | C | 0 | 11.6040 | 53.0320 | 23.7600 | H | 0 | 13.7250 | 42.3440 | 20.3980 | H | 0 |
| 15.9740 | 49.3900 | 23.8960 | H | 0 | 6.7630  | 48.4290 | 27.2590 | C | 0 | 13.2820 | 43.7440 | 19.4440 | H | 0 |
| 17.8820 | 50.4400 | 24.3920 | C | 0 | 6.9570  | 47.2960 | 26.7980 | O | 0 | 13.7060 | 42.0660 | 18.2720 | C | 0 |
| 18.1220 | 51.4430 | 24.7440 | H | 0 | 5.6560  | 48.8160 | 27.8610 | N | 0 | 14.3380 | 42.3960 | 17.4470 | H | 0 |
| 18.2940 | 49.6370 | 25.0040 | H | 0 | 5.6380  | 49.7270 | 28.2960 | H | 0 | 13.7870 | 40.9900 | 18.4210 | H | 0 |
| 18.6640 | 50.2830 | 23.0080 | C | 0 | 4.3730  | 48.0620 | 28.0290 | C | 0 | 12.2590 | 42.2600 | 17.8460 | C | 0 |
| 18.5500 | 51.1710 | 22.3860 | H | 0 | 4.5640  | 47.2170 | 28.6890 | H | 0 | 11.5520 | 41.7890 | 18.5290 | H | 0 |
| 19.7320 | 50.1920 | 23.2060 | H | 0 | 3.4740  | 48.9980 | 28.7230 | C | 0 | 11.9520 | 43.3050 | 17.7960 | H | 0 |
| 18.3800 | 48.9610 | 22.2180 | C | 0 | 4.0060  | 49.2490 | 29.6400 | H | 0 | 12.0440 | 41.6970 | 16.4600 | N | 0 |
| 18.2560 | 48.0870 | 22.8580 | H | 0 | 3.4280  | 49.8490 | 28.0440 | H | 0 | 11.0840 | 41.3960 | 16.3730 | H | 0 |
| 17.4110 | 49.0940 | 21.7370 | H | 0 | 2.0730  | 48.4280 | 29.0950 | C | 0 | 12.1030 | 42.4640 | 15.8060 | H | 0 |
| 19.3030 | 48.7850 | 20.9680 | C | 0 | 1.4020  | 49.2810 | 29.1900 | H | 0 | 12.6510 | 40.9010 | 16.3260 | H | 0 |
| 19.5570 | 49.7980 | 20.6550 | H | 0 | 1.6390  | 47.8080 | 28.3100 | H | 0 | 16.9320 | 44.6900 | 21.0390 | C | 0 |
| 20.2350 | 48.3160 | 21.2840 | H | 0 | 2.0100  | 47.5980 | 30.3690 | C | 0 | 17.1980 | 45.9020 | 20.9890 | O | 0 |
| 18.6390 | 48.0250 | 19.9230 | N | 0 | 2.8560  | 46.7600 | 30.6210 | O | 0 | 17.9190 | 43.8150 | 20.9880 | N | 0 |
| 18.0670 | 47.2690 | 20.2730 | H | 0 | 1.0130  | 47.8710 | 31.2250 | N | 0 | 17.6560 | 42.8440 | 21.0770 | H | 0 |
| 18.0340 | 48.7030 | 19.4820 | H | 0 | 0.8790  | 47.2560 | 32.0160 | H | 0 | 19.3400 | 44.1710 | 21.1550 | C | 0 |
| 19.2750 | 47.7730 | 19.1800 | H | 0 | 0.2800  | 48.4720 | 30.8760 | H | 0 | 20.0490 | 43.3440 | 21.1220 | H | 0 |
| 15.7540 | 50.4230 | 25.7170 | C | 0 | 3.7910  | 47.4360 | 26.7090 | C | 0 | 19.5360 | 44.7440 | 20.2480 | H | 0 |
| 15.9120 | 49.4410 | 26.4760 | O | 0 | 3.6950  | 48.2070 | 25.7210 | O | 0 | 19.6890 | 45.0270 | 22.3810 | C | 0 |
| 15.0720 | 51.5040 | 26.0750 | N | 0 | 3.3720  | 46.1670 | 26.5410 | N | 0 | 20.2580 | 46.0720 | 22.0790 | O | 0 |
| 15.1110 | 52.2460 | 25.3920 | H | 0 | 3.5660  | 45.3900 | 27.1560 | H | 0 | 19.1970 | 44.7500 | 23.5830 | N | 0 |
| 14.1900 | 51.6750 | 27.2530 | C | 0 | 2.7110  | 45.5740 | 25.3390 | C | 0 | 18.7190 | 43.8610 | 23.6000 | H | 0 |
| 14.7350 | 51.0930 | 27.9960 | H | 0 | 2.3000  | 44.6090 | 25.6380 | H | 0 | 19.5850 | 45.4740 | 24.7930 | C | 0 |
| 13.9200 | 53.1520 | 27.5820 | C | 0 | 1.8030  | 46.1700 | 25.2450 | H | 0 | 19.9260 | 46.4620 | 24.4840 | H | 0 |
| 14.8370 | 53.6400 | 27.9140 | H | 0 | 3.3860  | 45.3580 | 23.9780 | C | 0 | 18.5830 | 45.5090 | 25.9560 | C | 0 |
| 13.6430 | 53.6570 | 26.6560 | H | 0 | 2.6610  | 45.0320 | 23.0070 | O | 0 | 18.6260 | 44.4770 | 26.3040 | H | 0 |
| 12.9350 | 53.2820 | 28.6740 | C | 0 | 4.6770  | 45.5530 | 23.9070 | N | 0 | 18.9980 | 46.4090 | 27.1300 | C | 0 |
| 12.0280 | 52.8630 | 28.2370 | H | 0 | 5.0810  | 45.9060 | 24.7620 | H | 0 | 18.6640 | 47.4380 | 27.0030 | H | 0 |
| 13.0400 | 52.6710 | 29.5710 | H | 0 | 5.5620  | 45.6430 | 22.7000 | C | 0 | 18.5550 | 46.0490 | 28.0580 | H | 0 |
| 12.6930 | 54.6570 | 29.2390 | C | 0 | 5.0780  | 45.1430 | 21.8610 | H | 0 | 20.0560 | 46.2920 | 27.3690 | H | 0 |
| 12.6320 | 55.4150 | 28.4580 | H | 0 | 5.7060  | 47.1230 | 22.2550 | C | 0 | 17.1000 | 45.9020 | 25.4970 | C | 0 |
| 11.7760 | 54.8200 | 29.8050 | H | 0 | 6.3160  | 47.0670 | 21.3530 | H | 0 | 17.0840 | 46.9720 | 25.2890 | H | 0 |
| 13.8150 | 55.0490 | 30.0970 | N | 0 | 4.3840  | 47.7110 | 21.8640 | C | 0 | 16.8420 | 45.3480 | 24.5950 | H | 0 |
| 14.5940 | 55.5130 | 29.6520 | H | 0 | 3.5910  | 46.9630 | 21.8540 | H | 0 | 15.9860 | 45.5330 | 26.4730 | C | 0 |
| 13.9260 | 54.6810 | 31.3990 | C | 0 | 4.0840  | 48.4640 | 22.5930 | H | 0 | 16.2350 | 44.6160 | 27.0070 | H | 0 |
| 13.0680 | 53.8600 | 31.9780 | N | 0 | 4.5710  | 48.2200 | 20.9180 | H | 0 | 15.8110 | 46.3100 | 27.2170 | H | 0 |
| 12.1890 | 53.6540 | 31.5240 | H | 0 | 6.4140  | 48.1340 | 23.1860 | C | 0 | 15.0490 | 45.3360 | 25.9530 | H | 0 |
| 13.2220 | 53.6780 | 32.9590 | H | 0 | 7.4170  | 47.8040 | 23.4560 | H | 0 | 20.8160 | 44.8520 | 25.4380 | C | 0 |
| 15.0090 | 54.9920 | 32.1670 | N | 0 | 6.5480  | 49.1400 | 22.7880 | H | 0 | 21.0450 | 43.6070 | 25.4300 | O | 0 |
| 15.7220 | 55.5490 | 31.7190 | H | 0 | 5.8260  | 48.1780 | 24.1030 | H | 0 | 21.7840 | 45.6950 | 25.8210 | N | 0 |
| 15.0740 | 54.7350 | 33.1410 | H | 0 | 6.9260  | 45.0190 | 22.9320 | C | 0 | 21.6740 | 46.6470 | 25.5010 | H | 0 |
| 12.9810 | 50.8710 | 26.9240 | C | 0 | 7.3770  | 44.8900 | 24.0480 | O | 0 | 23.0910 | 45.3590 | 26.3940 | C | 0 |
| 12.2150 | 51.2350 | 26.0060 | O | 0 | 7.6190  | 44.5870 | 21.8950 | N | 0 | 22.9320 | 44.3740 | 26.8340 | H | 0 |
| 12.7160 | 49.8490 | 27.7060 | N | 0 | 7.3490  | 44.8440 | 20.9570 | H | 0 | 24.2300 | 45.2720 | 25.3250 | C | 0 |
| 13.2360 | 49.7960 | 28.5700 | H | 0 | 8.9190  | 43.8960 | 22.0020 | C | 0 | 24.5420 | 46.2770 | 25.0390 | H | 0 |
| 11.6110 | 48.9250 | 27.5460 | C | 0 | 9.0430  | 43.5120 | 23.0150 | H | 0 | 25.1060 | 44.8010 | 25.7700 | H | 0 |
| 11.5820 | 48.6510 | 26.4920 | H | 0 | 9.0100  | 42.7040 | 21.0360 | C | 0 | 23.9540 | 44.2700 | 23.8450 | S | 0 |
| 11.8270 | 47.5950 | 28.2250 | C | 0 | 9.9960  | 42.2570 | 20.9040 | H | 0 | 23.4640 | 46.3820 | 27.5370 | C | 0 |
| 11.0760 | 46.8890 | 27.8730 | H | 0 | 8.2770  | 41.9790 | 21.3900 | H | 0 | 23.4930 | 47.5390 | 27.2730 | O | 0 |
| 13.1930 | 46.9050 | 27.9370 | C | 0 | 8.6880  | 42.9680 | 19.5500 | C | 0 | 23.8700 | 46.0090 | 28.7510 | N | 0 |
| 13.2690 | 46.1470 | 28.7160 | H | 0 | 9.6190  | 42.8460 | 18.6990 | O | 0 | 24.3630 | 46.9040 | 29.7300 | C | 0 |
| 13.1030 | 46.4480 | 26.9510 | H | 0 | 7.4620  | 43.0650 | 19.2510 | O | 0 | 23.4860 | 47.2070 | 30.3010 | H | 0 |
| 13.9860 | 47.6530 | 27.9060 | H | 0 | 10.0770 | 44.9570 | 21.8300 | C | 0 | 24.9330 | 47.7350 | 29.3150 | H | 0 |
| 11.6730 | 47.7620 | 29.6070 | O | 0 | 10.0770 | 45.7090 | 20.8820 | O | 0 | 25.3910 | 46.2290 | 30.6790 | C | 0 |
| 12.3810 | 47.3720 | 30.1250 | H | 0 | 11.0540 | 44.8970 | 22.7690 | N | 0 | 25.2540 | 46.5210 | 31.7200 | H | 0 |
| 10.1840 | 49.4930 | 27.8480 | C | 0 | 11.0510 | 44.1630 | 23.4620 | H | 0 | 26.3820 | 46.4550 | 30.2840 | H | 0 |
| 10.1230 | 50.4340 | 28.6320 | O | 0 | 12.3200 | 45.6670 | 22.6380 | C | 0 | 24.9550 | 44.7300 | 30.5390 | C | 0 |
| 9.2040  | 48.9910 | 27.0710 | N | 0 | 12.2180 | 46.3870 | 21.8260 | H | 0 | 24.3740 | 44.3440 | 31.3770 | H | 0 |
| 9.4410  | 48.3840 | 26.3000 | H | 0 | 12.6550 | 46.3680 | 23.9640 | C | 0 | 25.8580 | 44.1430 | 30.3710 | H | 0 |
| 7.8230  | 49.5200 | 27.1870 | C | 0 | 12.8930 | 45.5950 | 24.6950 | H | 0 | 23.9970 | 44.6650 | 29.2640 | C | 0 |
| 7.8270  | 50.1820 | 28.0530 | H | 0 | 13.8680 | 47.2610 | 23.9050 | C | 0 | 24.3410 | 43.9960 | 28.4750 | H | 0 |
| 7.5600  | 50.4500 | 25.9310 | C | 0 | 14.2090 | 47.7050 | 24.8400 | H | 0 | 22.6380 | 44.1140 | 29.6420 | C | 0 |

|         |         |         |   |   |         |         |         |   |   |         |         |         |   |   |
|---------|---------|---------|---|---|---------|---------|---------|---|---|---------|---------|---------|---|---|
| 21.6250 | 44.8000 | 29.7930 | O | 0 | 28.7320 | 42.4470 | 37.4670 | C | 0 | 42.6620 | 44.8610 | 42.6630 | H | 0 |
| 22.6400 | 42.7760 | 29.7360 | N | 0 | 28.0210 | 43.3700 | 37.8100 | O | 0 | 41.7050 | 43.8680 | 43.8630 | H | 0 |
| 23.4940 | 42.2660 | 29.5610 | H | 0 | 28.7140 | 41.3190 | 38.2010 | N | 0 | 41.4270 | 43.6430 | 42.1540 | H | 0 |
| 21.4700 | 41.9740 | 30.2120 | C | 0 | 29.2560 | 40.4870 | 38.0140 | H | 0 | 41.1150 | 46.9430 | 42.5620 | C | 0 |
| 20.6100 | 42.4160 | 29.7090 | H | 0 | 27.9530 | 41.0190 | 39.3530 | C | 0 | 40.6400 | 47.5100 | 41.5670 | O | 0 |
| 21.7540 | 40.5500 | 29.7850 | C | 0 | 27.0460 | 41.6220 | 39.3240 | H | 0 | 41.9000 | 47.5590 | 43.3880 | N | 0 |
| 20.7560 | 40.1220 | 29.6940 | H | 0 | 27.5340 | 39.5510 | 39.3900 | C | 0 | 42.0670 | 47.1020 | 44.2730 | H | 0 |
| 22.2800 | 40.4410 | 28.8360 | H | 0 | 27.3980 | 39.1730 | 38.3770 | H | 0 | 42.7680 | 48.7600 | 43.1590 | C | 0 |
| 22.5100 | 39.7650 | 30.7820 | C | 0 | 28.2580 | 38.8680 | 39.8340 | H | 0 | 42.7150 | 49.0220 | 42.1020 | H | 0 |
| 23.6090 | 40.1730 | 31.1600 | O | 0 | 26.2940 | 39.2920 | 40.2050 | C | 0 | 42.3060 | 49.8470 | 44.0390 | C | 0 |
| 21.8230 | 38.6680 | 31.2150 | N | 0 | 25.1690 | 39.7180 | 39.7830 | O | 0 | 41.2540 | 49.9710 | 43.7820 | H | 0 |
| 22.4090 | 37.9200 | 31.5570 | H | 0 | 26.4740 | 38.7540 | 41.3190 | O | 0 | 42.4040 | 49.5980 | 45.0950 | H | 0 |
| 20.8640 | 38.4930 | 30.9510 | H | 0 | 28.7760 | 41.3520 | 40.5770 | C | 0 | 42.9750 | 51.1600 | 43.9380 | C | 0 |
| 21.1880 | 42.1540 | 31.7710 | C | 0 | 29.8300 | 41.9890 | 40.6460 | O | 0 | 42.9770 | 51.8230 | 42.7060 | C | 0 |
| 22.0770 | 42.5100 | 32.5370 | O | 0 | 28.3260 | 41.0440 | 41.8370 | N | 0 | 42.3750 | 51.4730 | 41.8810 | H | 0 |
| 19.9260 | 41.8100 | 32.1360 | N | 0 | 27.5270 | 40.4300 | 41.8990 | H | 0 | 43.6090 | 53.0660 | 42.5260 | C | 0 |
| 19.2680 | 41.4160 | 31.4780 | H | 0 | 28.9210 | 41.4660 | 43.1750 | C | 0 | 43.4730 | 53.5040 | 41.5480 | H | 0 |
| 19.5400 | 41.7900 | 33.5840 | C | 0 | 29.0930 | 42.5390 | 43.0800 | H | 0 | 44.1190 | 53.7660 | 43.6440 | C | 0 |
| 19.6680 | 42.7770 | 34.0280 | H | 0 | 27.9820 | 41.3060 | 44.3870 | C | 0 | 44.5940 | 54.7340 | 43.5990 | H | 0 |
| 18.0740 | 41.3890 | 33.6580 | C | 0 | 28.6000 | 41.5050 | 45.2630 | H | 0 | 44.2220 | 53.0300 | 44.8530 | C | 0 |
| 17.6380 | 41.4760 | 34.6530 | H | 0 | 27.1770 | 42.0400 | 44.3510 | H | 0 | 44.5560 | 53.5550 | 45.7350 | H | 0 |
| 17.5290 | 42.1360 | 33.0810 | H | 0 | 27.3900 | 39.9090 | 44.7450 | C | 0 | 43.6750 | 51.7740 | 45.0370 | C | 0 |
| 17.7150 | 40.0910 | 33.1170 | O | 0 | 27.1280 | 39.9310 | 45.8030 | H | 0 | 43.6970 | 51.3020 | 46.0090 | H | 0 |
| 16.7810 | 39.9500 | 33.2920 | H | 0 | 26.4290 | 39.8110 | 44.2380 | H | 0 | 44.1630 | 48.4170 | 43.5830 | C | 0 |
| 20.4390 | 40.9320 | 34.5510 | C | 0 | 28.3060 | 38.7190 | 44.4650 | C | 0 | 44.4080 | 47.7710 | 44.5950 | O | 0 |
| 20.3670 | 41.0440 | 35.7420 | O | 0 | 29.1490 | 38.4960 | 45.3240 | O | 0 | 45.1030 | 48.9710 | 42.8220 | N | 0 |
| 21.4290 | 40.0960 | 34.1050 | N | 0 | 28.0450 | 37.8750 | 43.5290 | N | 0 | 44.8960 | 49.4240 | 41.9440 | H | 0 |
| 21.5920 | 39.8760 | 33.1330 | H | 0 | 28.3990 | 36.9520 | 43.7340 | H | 0 | 46.4740 | 49.0810 | 43.3290 | C | 0 |
| 22.4220 | 39.4750 | 34.9700 | C | 0 | 27.3770 | 38.1190 | 42.8120 | H | 0 | 46.5740 | 48.6160 | 44.3100 | H | 0 |
| 22.0040 | 39.1190 | 35.9120 | H | 0 | 30.3070 | 40.8590 | 43.3630 | C | 0 | 47.4990 | 48.3510 | 42.5110 | C | 0 |
| 22.9540 | 38.3000 | 34.1790 | C | 0 | 30.9200 | 41.1070 | 44.3320 | O | 0 | 47.4720 | 47.2690 | 42.6360 | H | 0 |
| 22.1210 | 37.6820 | 33.8440 | H | 0 | 30.9530 | 40.1310 | 42.3790 | N | 0 | 47.4780 | 48.5080 | 41.4330 | H | 0 |
| 23.5610 | 38.6650 | 33.3510 | H | 0 | 30.4570 | 40.0580 | 41.5020 | H | 0 | 48.7650 | 48.8180 | 42.9340 | O | 0 |
| 23.6700 | 37.4300 | 35.1770 | C | 0 | 32.3940 | 39.7060 | 42.3980 | C | 0 | 49.3810 | 48.0980 | 42.7800 | H | 0 |
| 24.4000 | 38.0320 | 35.7180 | H | 0 | 32.5430 | 39.0590 | 43.2620 | H | 0 | 46.8680 | 50.5440 | 43.5550 | C | 0 |
| 22.9830 | 37.0660 | 35.9410 | H | 0 | 32.7540 | 38.8590 | 41.2200 | C | 0 | 47.1110 | 51.2450 | 42.5540 | O | 0 |
| 24.4910 | 36.0830 | 34.3560 | S | 0 | 33.8440 | 38.8400 | 41.2310 | H | 0 | 47.0930 | 50.9600 | 44.7910 | N | 0 |
| 23.3100 | 34.7030 | 34.5050 | C | 0 | 32.5440 | 37.8050 | 41.3970 | H | 0 | 46.9170 | 50.3080 | 46.0710 | C | 0 |
| 23.1670 | 34.4560 | 35.5570 | H | 0 | 32.3270 | 39.2070 | 39.8180 | C | 0 | 47.7260 | 49.5970 | 46.2350 | H | 0 |
| 22.4090 | 35.0620 | 34.0070 | H | 0 | 32.2390 | 40.2880 | 39.7100 | H | 0 | 45.9230 | 49.9020 | 46.2590 | H | 0 |
| 23.6800 | 33.8100 | 34.0010 | H | 0 | 33.1110 | 38.9060 | 39.1230 | H | 0 | 46.9770 | 51.4080 | 47.1270 | C | 0 |
| 23.4610 | 40.4350 | 35.3390 | C | 0 | 30.9720 | 38.5310 | 39.3600 | C | 0 | 47.3560 | 51.0650 | 48.0900 | H | 0 |
| 24.0770 | 40.2210 | 36.3680 | O | 0 | 30.4340 | 38.9560 | 38.3610 | O | 0 | 46.0570 | 51.9880 | 47.1940 | H | 0 |
| 23.7150 | 41.4600 | 34.5430 | N | 0 | 30.4180 | 37.5610 | 40.0970 | N | 0 | 48.0940 | 52.2480 | 46.5470 | C | 0 |
| 23.1310 | 41.5480 | 33.7240 | H | 0 | 29.5830 | 37.1710 | 39.6850 | H | 0 | 49.0100 | 51.6880 | 46.7360 | H | 0 |
| 24.6020 | 42.6700 | 34.7310 | C | 0 | 30.7480 | 37.0840 | 40.9240 | H | 0 | 48.0380 | 53.2280 | 47.0220 | H | 0 |
| 23.9260 | 43.5020 | 34.5330 | H | 0 | 33.2470 | 41.0400 | 42.4860 | C | 0 | 47.7520 | 52.2330 | 45.0320 | C | 0 |
| 24.9440 | 42.8520 | 35.7500 | H | 0 | 33.1570 | 41.8140 | 41.5500 | O | 0 | 47.0170 | 53.0150 | 44.8430 | H | 0 |
| 25.8370 | 42.6640 | 33.8520 | C | 0 | 33.9650 | 41.2810 | 43.6040 | N | 0 | 49.0750 | 52.5060 | 44.2550 | C | 0 |
| 26.2900 | 41.6270 | 33.3200 | O | 0 | 34.2350 | 40.3800 | 44.6310 | C | 0 | 49.4620 | 53.7000 | 44.0100 | O | 0 |
| 26.5000 | 43.8460 | 33.7380 | N | 0 | 34.6720 | 39.4170 | 44.3680 | H | 0 | 49.8700 | 51.4750 | 43.9000 | N | 0 |
| 26.0090 | 44.6810 | 34.0240 | H | 0 | 33.3410 | 40.0550 | 45.1630 | H | 0 | 49.4810 | 50.5450 | 43.8310 | H | 0 |
| 27.8820 | 43.7300 | 33.0620 | C | 0 | 35.1540 | 41.1250 | 45.7040 | C | 0 | 51.2010 | 51.5440 | 43.2860 | C | 0 |
| 27.8560 | 43.1340 | 32.1500 | H | 0 | 36.1830 | 41.0310 | 45.3570 | H | 0 | 51.8400 | 52.1350 | 43.9410 | H | 0 |
| 28.2220 | 44.6540 | 32.5960 | H | 0 | 34.9890 | 40.7260 | 46.7050 | H | 0 | 51.7720 | 50.1570 | 43.2040 | C | 0 |
| 29.1030 | 43.2490 | 33.8750 | C | 0 | 34.7870 | 42.6020 | 45.3840 | C | 0 | 51.4550 | 49.5500 | 44.0520 | H | 0 |
| 30.1900 | 42.8430 | 33.4200 | O | 0 | 35.6750 | 43.1920 | 45.6100 | H | 0 | 51.3350 | 49.6890 | 42.3220 | H | 0 |
| 28.8250 | 43.2850 | 35.2040 | N | 0 | 33.8870 | 42.8240 | 45.9580 | H | 0 | 53.2800 | 50.2060 | 42.9020 | C | 0 |
| 27.9910 | 43.6890 | 35.6050 | H | 0 | 34.4840 | 42.5990 | 43.8840 | C | 0 | 53.4650 | 50.7310 | 41.9650 | H | 0 |
| 29.5990 | 42.5360 | 36.1980 | C | 0 | 33.6960 | 43.3360 | 43.7340 | H | 0 | 53.6800 | 50.7350 | 43.7670 | H | 0 |
| 29.8370 | 41.5320 | 35.8450 | H | 0 | 35.7580 | 42.9550 | 43.0920 | C | 0 | 53.7170 | 48.7370 | 42.7670 | C | 0 |
| 30.8130 | 43.3550 | 36.5630 | C | 0 | 36.7020 | 42.1170 | 43.0100 | O | 0 | 52.9460 | 47.8630 | 42.3030 | O | 0 |
| 31.4410 | 43.5090 | 35.6860 | H | 0 | 35.8980 | 44.2040 | 42.6430 | N | 0 | 54.8300 | 48.2930 | 43.2840 | N | 0 |
| 30.4820 | 44.2980 | 36.9980 | H | 0 | 35.1100 | 44.8210 | 42.7710 | H | 0 | 54.9360 | 47.2950 | 43.3970 | H | 0 |
| 31.8090 | 42.8160 | 37.7010 | C | 0 | 37.1280 | 44.7230 | 41.9560 | C | 0 | 55.4350 | 48.8500 | 43.8710 | H | 0 |
| 31.2660 | 42.3200 | 38.5060 | H | 0 | 37.3980 | 43.9390 | 41.2490 | H | 0 | 51.0970 | 52.1010 | 41.8480 | C | 0 |
| 32.5050 | 42.0790 | 37.2990 | H | 0 | 36.6790 | 45.7950 | 40.9630 | C | 0 | 51.9390 | 52.8600 | 41.3830 | O | 0 |
| 32.8000 | 43.8230 | 38.2970 | C | 0 | 35.9140 | 45.3800 | 40.3070 | H | 0 | 50.0560 | 51.6370 | 41.1760 | N | 0 |
| 33.5970 | 43.3460 | 38.8690 | H | 0 | 36.2830 | 46.6150 | 41.5630 | H | 0 | 49.3440 | 51.1980 | 41.7410 | H | 0 |
| 33.2880 | 44.3580 | 37.4820 | H | 0 | 37.5430 | 46.1420 | 40.3950 | H | 0 | 49.7870 | 51.9610 | 39.7850 | C | 0 |
| 32.0740 | 44.7960 | 39.3350 | C | 0 | 38.2630 | 45.0760 | 42.9480 | C | 0 | 50.7160 | 52.2290 | 39.2820 | H | 0 |
| 32.7190 | 45.6370 | 39.5910 | H | 0 | 38.1110 | 45.3340 | 44.1300 | O | 0 | 49.1980 | 50.7500 | 39.0640 | C | 0 |
| 31.1670 | 45.1820 | 38.8700 | H | 0 | 39.4770 | 45.1020 | 42.3730 | N | 0 | 48.9530 | 51.0720 | 38.0520 | H | 0 |
| 31.7570 | 44.0160 | 40.5560 | N | 0 | 39.5200 | 44.9530 | 41.3750 | H | 0 | 50.1460 | 49.5030 | 39.0380 | C | 0 |
| 31.0390 | 43.3060 | 40.5340 | H | 0 | 40.6620 | 45.4980 | 43.0030 | C | 0 | 49.9370 | 48.7770 | 39.8240 | H | 0 |
| 32.6360 | 43.7050 | 40.9450 | H | 0 | 40.5330 | 45.5590 | 44.0830 | H | 0 | 50.3460 | 49.0330 | 38.0750 | H | 0 |
| 31.4270 | 44.5190 | 41.3670 | H | 0 | 41.7130 | 44.3820 | 42.9020 | C | 0 | 51.1580 | 49.8030 | 39.3130 | H | 0 |

|         |         |         |   |   |         |         |         |   |   |         |         |         |   |   |
|---------|---------|---------|---|---|---------|---------|---------|---|---|---------|---------|---------|---|---|
| 48.0100 | 50.4460 | 39.7060 | O | 0 | 36.1400 | 45.8680 | 36.9700 | C | 0 | 26.9480 | 36.1300 | 31.0040 | C | 0 |
| 47.7190 | 49.6520 | 39.2510 | H | 0 | 35.9110 | 45.8770 | 38.0360 | H | 0 | 27.8550 | 36.0290 | 30.4080 | H | 0 |
| 48.7470 | 53.2050 | 39.6670 | C | 0 | 35.7970 | 46.8020 | 36.5250 | H | 0 | 26.9310 | 37.1430 | 31.4060 | H | 0 |
| 48.8670 | 54.1140 | 38.8320 | O | 0 | 35.5660 | 45.0740 | 36.4920 | H | 0 | 26.8850 | 35.4160 | 31.8250 | H | 0 |
| 47.8570 | 53.2550 | 40.6760 | N | 0 | 38.2420 | 46.9650 | 37.3100 | C | 0 | 24.6030 | 40.3490 | 27.4170 | C | 0 |
| 47.9390 | 52.5330 | 41.3780 | H | 0 | 39.2520 | 47.1100 | 36.9270 | H | 0 | 24.6310 | 41.3620 | 28.1140 | O | 0 |
| 46.7420 | 54.1980 | 40.6540 | C | 0 | 37.8330 | 47.8660 | 36.8520 | H | 0 | 23.6950 | 40.1790 | 26.5130 | N | 0 |
| 46.3740 | 54.3860 | 41.6630 | H | 0 | 38.1270 | 47.1430 | 38.3790 | H | 0 | 23.5370 | 39.2350 | 26.1920 | H | 0 |
| 47.0200 | 55.1810 | 40.2760 | H | 0 | 37.6050 | 43.0670 | 36.6240 | C | 0 | 22.6360 | 41.0540 | 26.0430 | C | 0 |
| 45.4860 | 53.6090 | 39.8940 | C | 0 | 38.0470 | 42.7890 | 35.5440 | O | 0 | 22.6370 | 41.9290 | 26.6920 | H | 0 |
| 44.6120 | 54.3720 | 39.6310 | O | 0 | 36.9290 | 42.1320 | 37.3250 | N | 0 | 23.0420 | 41.4600 | 24.6110 | C | 0 |
| 45.4720 | 52.3350 | 39.4410 | N | 0 | 36.3570 | 42.3440 | 38.6440 | C | 0 | 23.2220 | 40.5660 | 24.0130 | H | 0 |
| 46.2850 | 51.7870 | 39.6840 | H | 0 | 35.8400 | 43.2620 | 38.9220 | H | 0 | 22.2580 | 42.0390 | 24.1230 | H | 0 |
| 44.5550 | 51.7060 | 38.5090 | C | 0 | 37.1960 | 42.1950 | 39.3240 | H | 0 | 24.5650 | 42.3980 | 24.4840 | S | 0 |
| 43.8880 | 52.4760 | 38.1200 | H | 0 | 35.4190 | 41.1080 | 38.8700 | C | 0 | 21.2830 | 40.3070 | 26.0560 | C | 0 |
| 45.3240 | 51.2320 | 37.3090 | C | 0 | 34.3790 | 41.4140 | 38.7560 | H | 0 | 21.2180 | 39.1470 | 26.4350 | O | 0 |
| 45.8780 | 50.3670 | 37.6740 | H | 0 | 35.5960 | 40.6580 | 39.8460 | H | 0 | 20.2130 | 40.9850 | 25.6610 | N | 0 |
| 44.6300 | 50.8660 | 36.5530 | H | 0 | 35.6060 | 40.0940 | 37.7300 | C | 0 | 20.3090 | 41.9690 | 25.4570 | H | 0 |
| 46.4030 | 52.2300 | 36.6900 | C | 0 | 34.6440 | 39.6330 | 37.5070 | H | 0 | 18.8940 | 40.4010 | 25.8210 | C | 0 |
| 47.1630 | 52.4450 | 37.4420 | H | 0 | 36.4100 | 39.3930 | 37.9560 | H | 0 | 19.0460 | 39.3880 | 25.4470 | H | 0 |
| 47.0640 | 51.7200 | 35.4090 | C | 0 | 36.1480 | 41.0150 | 36.6510 | C | 0 | 18.4310 | 40.4170 | 27.3110 | C | 0 |
| 46.9960 | 50.6340 | 35.3470 | H | 0 | 36.8510 | 40.4030 | 36.0860 | H | 0 | 17.5300 | 39.8140 | 27.4240 | H | 0 |
| 46.5480 | 52.1710 | 34.5610 | H | 0 | 34.9850 | 41.5980 | 35.8160 | C | 0 | 19.1450 | 39.8120 | 27.8710 | H | 0 |
| 48.1190 | 51.9910 | 35.4360 | H | 0 | 34.4310 | 42.6810 | 36.1510 | O | 0 | 18.2720 | 41.7590 | 27.9820 | C | 0 |
| 45.8120 | 53.5730 | 36.2950 | C | 0 | 34.6150 | 40.9490 | 34.6560 | N | 0 | 19.1530 | 42.3930 | 27.8680 | H | 0 |
| 46.5900 | 54.1570 | 35.8030 | H | 0 | 35.0320 | 40.0620 | 34.4110 | H | 0 | 17.5940 | 42.3640 | 27.3800 | H | 0 |
| 45.0000 | 53.4540 | 35.5780 | H | 0 | 33.3560 | 41.3230 | 33.8780 | C | 0 | 17.5030 | 41.8720 | 29.5600 | S | 0 |
| 45.6220 | 54.2160 | 37.1550 | H | 0 | 32.6640 | 41.7570 | 34.5990 | H | 0 | 17.4900 | 43.5980 | 30.0220 | C | 0 |
| 43.7200 | 50.5700 | 39.0810 | C | 0 | 33.6970 | 42.2920 | 32.7640 | C | 0 | 16.8850 | 43.8270 | 30.8990 | H | 0 |
| 44.1450 | 49.9700 | 40.0810 | O | 0 | 32.7800 | 42.7250 | 32.3650 | H | 0 | 18.5100 | 43.8890 | 30.2710 | H | 0 |
| 42.6510 | 50.2090 | 38.4110 | N | 0 | 34.5220 | 43.5510 | 33.1700 | C | 0 | 17.1860 | 44.2650 | 29.2160 | H | 0 |
| 42.4500 | 50.7510 | 37.5830 | H | 0 | 33.9650 | 44.1200 | 33.9150 | H | 0 | 17.8170 | 41.0730 | 24.9860 | C | 0 |
| 41.7250 | 49.1600 | 38.8670 | C | 0 | 35.5130 | 43.2070 | 33.4660 | H | 0 | 17.8760 | 42.3130 | 24.6680 | O | 0 |
| 42.0790 | 48.9360 | 39.8740 | H | 0 | 34.6740 | 44.2260 | 32.3280 | H | 0 | 16.8240 | 40.2370 | 24.6340 | N | 0 |
| 40.2330 | 49.6380 | 38.8390 | C | 0 | 34.3650 | 41.6900 | 31.6830 | O | 0 | 16.9260 | 39.2770 | 24.9280 | H | 0 |
| 39.9300 | 49.7240 | 37.7950 | H | 0 | 35.1800 | 41.3310 | 32.0430 | H | 0 | 15.3880 | 40.6720 | 24.2560 | C | 0 |
| 39.5520 | 48.8910 | 39.2470 | H | 0 | 32.6400 | 40.1160 | 33.2570 | C | 0 | 15.6070 | 41.6670 | 23.8690 | H | 0 |
| 39.9270 | 50.9520 | 39.6810 | C | 0 | 33.1540 | 39.0530 | 32.9280 | O | 0 | 14.7080 | 39.8050 | 23.1770 | C | 0 |
| 40.4840 | 52.1570 | 39.3090 | C | 0 | 31.3380 | 40.3050 | 32.9550 | N | 0 | 14.7050 | 38.7600 | 23.4860 | H | 0 |
| 41.1230 | 52.3730 | 38.4650 | H | 0 | 30.9660 | 41.2450 | 32.9570 | H | 0 | 13.7080 | 40.1150 | 22.8730 | H | 0 |
| 40.3430 | 53.2570 | 40.2830 | C | 0 | 30.4620 | 39.4320 | 32.2280 | C | 0 | 15.4640 | 39.9520 | 21.7750 | C | 0 |
| 40.6960 | 54.2500 | 40.0510 | H | 0 | 30.9340 | 38.4950 | 31.9350 | H | 0 | 16.5390 | 40.4750 | 21.6840 | O | 0 |
| 39.6910 | 53.0680 | 41.4700 | C | 0 | 29.2430 | 39.0680 | 33.1200 | C | 0 | 14.9030 | 39.4920 | 20.6810 | N | 0 |
| 39.5160 | 53.9050 | 42.1290 | H | 0 | 28.6230 | 39.9280 | 33.3720 | H | 0 | 15.3720 | 39.7040 | 19.8120 | H | 0 |
| 39.1630 | 51.8090 | 41.7500 | C | 0 | 28.6790 | 38.3340 | 32.5440 | H | 0 | 13.9710 | 39.1040 | 20.6410 | H | 0 |
| 38.5540 | 51.7110 | 42.6360 | H | 0 | 29.7780 | 38.4990 | 34.4110 | C | 0 | 14.4850 | 40.8320 | 25.5080 | C | 0 |
| 39.3070 | 50.7890 | 40.8650 | C | 0 | 30.6800 | 37.6360 | 34.5600 | O | 0 | 14.7160 | 40.0770 | 26.4510 | O | 0 |
| 39.0490 | 49.7780 | 41.1430 | H | 0 | 29.1410 | 38.7030 | 35.4950 | N | 0 | 13.4890 | 41.7310 | 25.4330 | N | 0 |
| 41.9520 | 47.7930 | 38.1630 | C | 0 | 29.4610 | 38.3240 | 36.3750 | H | 0 | 13.3100 | 42.2350 | 24.5760 | H | 0 |
| 42.4040 | 47.7740 | 37.0410 | O | 0 | 28.2500 | 39.1630 | 35.3660 | H | 0 | 12.4520 | 41.9010 | 26.4180 | C | 0 |
| 41.5680 | 46.7180 | 38.8300 | N | 0 | 30.1310 | 40.0830 | 30.8850 | C | 0 | 12.3900 | 40.9740 | 26.9890 | H | 0 |
| 41.0890 | 46.8370 | 39.7110 | H | 0 | 30.3460 | 41.3020 | 30.7280 | O | 0 | 12.9800 | 43.1450 | 27.1640 | C | 0 |
| 41.7380 | 45.3370 | 38.3640 | C | 0 | 29.6330 | 39.3920 | 29.8570 | N | 0 | 13.8840 | 42.7110 | 27.5920 | H | 0 |
| 41.9280 | 45.3070 | 37.2910 | H | 0 | 29.7880 | 38.3950 | 29.8960 | H | 0 | 13.2110 | 43.9630 | 26.4820 | H | 0 |
| 42.8630 | 44.6750 | 39.1410 | C | 0 | 29.3770 | 39.8970 | 28.4850 | C | 0 | 12.1100 | 43.6030 | 28.3030 | C | 0 |
| 42.5140 | 44.5640 | 40.1680 | H | 0 | 29.3610 | 40.9840 | 28.5600 | H | 0 | 10.9560 | 44.3050 | 28.0400 | C | 0 |
| 43.0470 | 43.6730 | 38.7530 | H | 0 | 30.6300 | 39.6620 | 27.6880 | C | 0 | 10.5690 | 44.3240 | 27.0320 | H | 0 |
| 44.1960 | 45.3860 | 38.9060 | C | 0 | 31.4430 | 40.0660 | 28.2910 | H | 0 | 10.1680 | 44.7430 | 29.1410 | C | 0 |
| 44.9410 | 45.1440 | 37.7590 | C | 0 | 30.8880 | 38.6030 | 27.6960 | H | 0 | 9.1790  | 45.1650 | 29.0350 | H | 0 |
| 44.6100 | 44.3760 | 37.0750 | H | 0 | 30.5860 | 40.3440 | 26.3140 | C | 0 | 10.6030 | 44.6940 | 30.4500 | C | 0 |
| 46.0880 | 45.8850 | 37.4380 | C | 0 | 29.8780 | 41.3320 | 26.1350 | O | 0 | 9.8970  | 45.1630 | 31.5260 | O | 0 |
| 46.5480 | 45.7140 | 36.4760 | H | 0 | 31.2600 | 39.7820 | 25.3010 | N | 0 | 10.4690 | 45.5040 | 32.2180 | H | 0 |
| 46.4400 | 47.0040 | 38.2540 | C | 0 | 31.1260 | 40.2140 | 24.3980 | H | 0 | 11.7790 | 43.9860 | 30.7020 | C | 0 |
| 47.4760 | 47.9250 | 37.9210 | O | 0 | 31.7630 | 38.9140 | 25.4140 | H | 0 | 12.0130 | 43.8150 | 31.7420 | H | 0 |
| 47.7570 | 47.7600 | 37.0180 | H | 0 | 28.0880 | 39.2780 | 27.7310 | C | 0 | 12.5210 | 43.4200 | 29.6350 | C | 0 |
| 45.6780 | 47.2560 | 39.3430 | C | 0 | 28.2210 | 38.3260 | 26.9890 | O | 0 | 13.4270 | 42.8970 | 29.9050 | H | 0 |
| 45.9130 | 48.0890 | 39.9890 | H | 0 | 26.9180 | 39.9290 | 28.0370 | N | 0 | 11.0930 | 42.0380 | 25.8120 | C | 0 |
| 44.5920 | 46.4580 | 39.7310 | C | 0 | 26.9880 | 40.9000 | 28.3040 | H | 0 | 10.9340 | 42.5940 | 24.6750 | O | 0 |
| 44.0010 | 46.7570 | 40.5830 | H | 0 | 25.6230 | 39.3440 | 27.6990 | C | 0 | 10.0580 | 41.6520 | 26.5310 | N | 0 |
| 40.3100 | 44.6460 | 38.5420 | C | 0 | 25.6330 | 38.7480 | 26.7860 | H | 0 | 10.1500 | 41.0390 | 27.3280 | H | 0 |
| 39.8300 | 44.4910 | 39.6720 | O | 0 | 25.2180 | 38.4140 | 28.7300 | C | 0 | 8.6840  | 41.9700 | 26.1540 | C | 0 |
| 39.6170 | 44.4200 | 37.4130 | N | 0 | 25.6140 | 38.8310 | 29.6560 | H | 0 | 8.6920  | 42.7330 | 25.3750 | H | 0 |
| 40.0730 | 44.5050 | 36.5150 | H | 0 | 24.1330 | 38.4170 | 28.8410 | H | 0 | 8.1510  | 40.7100 | 25.5750 | C | 0 |
| 38.1400 | 44.3780 | 37.3470 | C | 0 | 25.7890 | 36.9760 | 28.5140 | C | 0 | 8.2740  | 39.8770 | 26.2680 | H | 0 |
| 37.7380 | 44.3830 | 38.3600 | H | 0 | 25.2190 | 36.5190 | 27.7050 | H | 0 | 7.0830  | 40.8630 | 25.4180 | H | 0 |
| 37.5980 | 45.6890 | 36.7450 | C | 0 | 26.8280 | 36.8920 | 28.1950 | H | 0 | 8.7570  | 40.2530 | 24.2860 | C | 0 |
| 37.8290 | 45.7360 | 35.6810 | H | 0 | 25.4150 | 35.9150 | 29.9010 | S | 0 | 8.5930  | 41.0880 | 23.6040 | H | 0 |

|         |         |         |   |   |         |         |         |   |   |         |         |         |   |   |
|---------|---------|---------|---|---|---------|---------|---------|---|---|---------|---------|---------|---|---|
| 9.8370  | 40.1100 | 24.2810 | H | 0 | 2.4900  | 43.8340 | 41.1990 | H | 0 | 2.4400  | 42.0810 | 37.2230 | C | 0 |
| 7.9640  | 39.0600 | 23.6420 | C | 0 | 2.8370  | 44.0120 | 43.3290 | C | 0 | 1.7160  | 41.6710 | 36.5340 | H | 0 |
| 6.7460  | 39.1860 | 23.3700 | O | 0 | 3.8720  | 43.7470 | 43.1720 | H | 0 | 2.8010  | 43.4480 | 37.1210 | C | 0 |
| 8.6100  | 38.0840 | 23.2170 | O | 0 | 2.1740  | 44.0990 | 44.5860 | C | 0 | 2.3460  | 44.2040 | 36.0950 | O | 0 |
| 7.8930  | 42.4510 | 27.3560 | C | 0 | 2.8320  | 43.8610 | 45.7190 | O | 0 | 1.5150  | 43.8310 | 35.7940 | H | 0 |
| 7.7810  | 41.7190 | 28.3200 | O | 0 | 3.7250  | 43.6010 | 45.4800 | H | 0 | 3.5740  | 44.0220 | 38.1570 | C | 0 |
| 7.4790  | 43.6930 | 27.3680 | N | 0 | 0.7810  | 44.1970 | 44.5620 | C | 0 | 3.7600  | 45.0850 | 38.1060 | H | 0 |
| 7.7300  | 44.2850 | 26.5890 | H | 0 | 0.2850  | 44.1580 | 45.5200 | H | 0 | 4.0390  | 43.1980 | 39.1390 | C | 0 |
| 6.6460  | 44.2970 | 28.4820 | C | 0 | 0.0230  | 44.4690 | 43.4040 | C | 0 | 4.6310  | 43.6650 | 39.9120 | H | 0 |
| 7.0390  | 44.0250 | 29.4610 | H | 0 | -1.0550 | 44.5160 | 43.4560 | H | 0 | 6.5620  | 40.8510 | 39.0040 | C | 0 |
| 6.5410  | 45.3770 | 28.3780 | H | 0 | -0.5510 | 41.9460 | 40.9300 | C | 0 | 7.1330  | 41.8390 | 39.5200 | O | 0 |
| 5.2170  | 43.7800 | 28.3050 | C | 0 | -1.7490 | 41.6030 | 40.9490 | O | 0 | 6.8780  | 40.4720 | 37.7270 | N | 0 |
| 4.6550  | 43.8920 | 27.2230 | O | 0 | 0.3420  | 41.3600 | 41.7230 | N | 0 | 6.3190  | 39.7360 | 37.3200 | H | 0 |
| 4.5980  | 43.3800 | 29.4130 | N | 0 | 1.2330  | 41.8020 | 41.8980 | H | 0 | 7.7750  | 41.2010 | 36.7500 | C | 0 |
| 5.1730  | 43.3410 | 30.2430 | H | 0 | 0.1210  | 40.2350 | 42.6420 | C | 0 | 8.2010  | 41.9930 | 37.3660 | H | 0 |
| 3.3710  | 42.6070 | 29.4080 | C | 0 | -0.7920 | 40.3770 | 43.2200 | H | 0 | 8.9700  | 40.3170 | 36.3610 | C | 0 |
| 2.8660  | 42.7060 | 28.4470 | H | 0 | 0.0490  | 38.8940 | 41.9420 | C | 0 | 9.6650  | 40.8550 | 35.7150 | H | 0 |
| 3.6630  | 41.0620 | 29.7770 | C | 0 | -0.5480 | 38.9940 | 41.0350 | H | 0 | 9.7870  | 40.0680 | 37.6330 | C | 0 |
| 4.3060  | 41.0960 | 30.6570 | H | 0 | 1.3490  | 38.2980 | 41.4420 | C | 0 | 9.9880  | 41.0610 | 38.0350 | H | 0 |
| 2.2960  | 40.3400 | 30.0200 | C | 0 | 1.8710  | 38.9140 | 40.7100 | H | 0 | 9.2900  | 39.4800 | 38.4050 | H | 0 |
| 2.5310  | 39.2770 | 30.0620 | H | 0 | 1.9820  | 38.1310 | 42.3140 | H | 0 | 10.7370 | 39.5520 | 37.4960 | H | 0 |
| 1.7780  | 40.5980 | 30.9440 | H | 0 | 1.0800  | 37.3630 | 40.9500 | H | 0 | 8.5750  | 39.0520 | 35.6180 | C | 0 |
| 1.6150  | 40.4120 | 29.1720 | H | 0 | -0.4570 | 37.8950 | 42.8520 | O | 0 | 8.4010  | 38.2730 | 36.3610 | H | 0 |
| 4.3730  | 40.4320 | 28.5310 | C | 0 | -1.2670 | 38.2030 | 43.2650 | H | 0 | 7.6640  | 39.1080 | 35.0220 | H | 0 |
| 4.5780  | 39.3680 | 28.6550 | H | 0 | 1.2530  | 40.1390 | 43.6640 | C | 0 | 9.4010  | 38.7150 | 34.9920 | H | 0 |
| 3.6830  | 40.4940 | 27.6890 | H | 0 | 2.3760  | 40.6050 | 43.3590 | O | 0 | 7.0500  | 41.8760 | 35.5230 | C | 0 |
| 5.3040  | 40.9150 | 28.2320 | H | 0 | 0.9800  | 39.5960 | 44.8240 | N | 0 | 7.6330  | 42.8280 | 34.9150 | O | 0 |
| 2.2950  | 43.2890 | 30.3540 | C | 0 | 0.0400  | 39.2660 | 44.9900 | H | 0 | 5.8120  | 41.5230 | 35.2080 | N | 0 |
| 2.6170  | 43.7260 | 31.4810 | O | 0 | 1.9160  | 39.6080 | 46.0000 | C | 0 | 5.4410  | 40.8060 | 35.8140 | H | 0 |
| 1.0620  | 43.3740 | 29.8460 | N | 0 | 2.7750  | 40.2620 | 45.8510 | H | 0 | 5.0340  | 42.1670 | 34.1250 | C | 0 |
| 0.8490  | 42.9510 | 28.9540 | H | 0 | 1.0920  | 40.2920 | 47.1790 | C | 0 | 4.1920  | 41.5090 | 33.9110 | H | 0 |
| -0.0640 | 44.0340 | 30.3990 | C | 0 | 0.8840  | 41.3340 | 46.9390 | H | 0 | 4.7560  | 43.1010 | 34.6120 | H | 0 |
| 0.3080  | 44.9310 | 30.8930 | H | 0 | 0.1310  | 39.7790 | 47.2040 | H | 0 | 5.7860  | 42.2620 | 32.7580 | C | 0 |
| -1.0580 | 44.4930 | 29.3590 | C | 0 | 1.6470  | 40.4240 | 48.1080 | H | 0 | 5.6740  | 43.2240 | 31.9890 | O | 0 |
| -1.5120 | 43.7220 | 28.7360 | H | 0 | 2.5590  | 38.2520 | 46.1770 | C | 0 | 6.7230  | 41.3220 | 32.4270 | N | 0 |
| -1.8390 | 45.1260 | 29.7820 | H | 0 | 2.1200  | 37.2590 | 45.6130 | O | 0 | 6.8690  | 40.6530 | 33.1700 | H | 0 |
| -0.2560 | 45.3850 | 28.3360 | C | 0 | 3.6330  | 38.1320 | 46.9920 | N | 0 | 7.5330  | 41.1940 | 31.2130 | C | 0 |
| 0.5990  | 45.8190 | 28.8550 | H | 0 | 3.9910  | 38.9680 | 47.4300 | H | 0 | 6.9120  | 41.6590 | 30.4470 | H | 0 |
| 0.0970  | 44.8970 | 27.4280 | H | 0 | 4.3380  | 36.9860 | 47.4700 | C | 0 | 8.7610  | 42.0160 | 31.3660 | C | 0 |
| -1.1520 | 46.5400 | 27.8850 | C | 0 | 5.0720  | 37.4340 | 48.1390 | H | 0 | 9.3280  | 41.9090 | 30.4410 | H | 0 |
| -2.1580 | 46.2770 | 27.1480 | O | 0 | 3.6020  | 36.3920 | 48.0120 | H | 0 | 8.3780  | 43.0190 | 31.5560 | H | 0 |
| -0.9270 | 47.7130 | 28.2160 | O | 0 | 5.0900  | 36.0090 | 46.4810 | C | 0 | 9.2140  | 41.6460 | 32.2860 | H | 0 |
| -0.6560 | 43.2470 | 31.6920 | C | 0 | 5.8400  | 35.0310 | 46.8350 | O | 0 | 7.8150  | 39.7280 | 30.8560 | C | 0 |
| -1.8440 | 43.4360 | 32.0580 | O | 0 | 4.8930  | 36.2950 | 45.1920 | N | 0 | 7.5680  | 38.8990 | 31.7250 | O | 0 |
| 0.1880  | 42.4180 | 32.3610 | N | 0 | 4.1410  | 36.9540 | 45.0480 | H | 0 | 8.4390  | 39.4030 | 29.7180 | N | 0 |
| 1.1460  | 42.5770 | 32.0850 | H | 0 | 5.5920  | 35.7530 | 43.9860 | C | 0 | 8.3790  | 40.0550 | 28.9490 | H | 0 |
| -0.2330 | 41.6730 | 33.5150 | C | 0 | 6.4320  | 35.1390 | 44.3130 | H | 0 | 9.2930  | 38.2040 | 29.5440 | C | 0 |
| -1.1600 | 41.1840 | 33.2170 | H | 0 | 4.5680  | 34.9280 | 43.3390 | C | 0 | 9.3250  | 37.5340 | 30.4030 | H | 0 |
| 0.7270  | 40.4750 | 33.8000 | C | 0 | 5.0130  | 34.3760 | 42.5110 | H | 0 | 8.6620  | 37.3520 | 28.4190 | C | 0 |
| 1.0180  | 39.9450 | 32.8930 | H | 0 | 4.2850  | 34.0910 | 43.9770 | H | 0 | 7.6070  | 37.1580 | 28.6100 | H | 0 |
| 1.6900  | 40.8660 | 34.1280 | H | 0 | 3.7070  | 35.5600 | 43.1220 | H | 0 | 8.8400  | 37.8390 | 27.4600 | H | 0 |
| 0.2190  | 39.8320 | 34.5190 | H | 0 | 6.1400  | 36.8990 | 43.1710 | C | 0 | 9.3880  | 35.9640 | 28.2830 | C | 0 |
| -0.5870 | 42.4950 | 34.7470 | C | 0 | 5.5260  | 37.9870 | 43.1380 | O | 0 | 9.3530  | 35.0350 | 29.0630 | O | 0 |
| 0.1570  | 43.3970 | 35.0940 | O | 0 | 7.2770  | 36.7330 | 42.4130 | N | 0 | 10.0230 | 35.7160 | 27.1320 | N | 0 |
| -1.7210 | 42.2720 | 35.4510 | N | 0 | 8.0430  | 35.5010 | 42.1060 | C | 0 | 10.2700 | 34.7390 | 27.0590 | H | 0 |
| -2.3800 | 41.5810 | 35.1210 | H | 0 | 7.3590  | 34.7510 | 41.7090 | H | 0 | 10.2130 | 36.4550 | 26.4690 | H | 0 |
| -2.1010 | 42.8510 | 36.7740 | C | 0 | 8.6070  | 35.2260 | 42.9970 | H | 0 | 10.7260 | 38.5910 | 29.0400 | C | 0 |
| -2.0310 | 43.9270 | 36.6150 | H | 0 | 9.0360  | 35.8810 | 41.0240 | C | 0 | 10.9090 | 39.7080 | 28.5270 | O | 0 |
| -3.4910 | 42.4040 | 37.2520 | C | 0 | 8.7000  | 35.6580 | 40.0110 | H | 0 | 11.8230 | 37.8870 | 29.2730 | N | 0 |
| -3.6640 | 42.7440 | 38.2730 | H | 0 | 9.9950  | 35.3880 | 41.1880 | H | 0 | 11.7850 | 37.1170 | 29.9260 | H | 0 |
| -4.6280 | 43.0410 | 36.4060 | C | 0 | 9.2370  | 37.3810 | 41.1910 | C | 0 | 13.1610 | 38.2350 | 28.8190 | C | 0 |
| -4.3920 | 42.9980 | 35.3430 | H | 0 | 9.4800  | 37.8300 | 40.2280 | H | 0 | 13.1020 | 39.0120 | 28.0560 | H | 0 |
| -5.5370 | 42.4580 | 36.5530 | H | 0 | 9.9940  | 37.5150 | 41.9640 | H | 0 | 13.9790 | 38.6930 | 30.0480 | C | 0 |
| -4.6610 | 44.0850 | 36.7170 | H | 0 | 7.8630  | 37.8270 | 41.6970 | C | 0 | 13.8790 | 38.0110 | 30.8920 | H | 0 |
| -3.5920 | 40.9770 | 37.2950 | O | 0 | 8.0310  | 38.6580 | 42.3810 | H | 0 | 15.4710 | 38.9530 | 29.7220 | C | 0 |
| -3.1510 | 40.7610 | 38.1190 | H | 0 | 6.9630  | 38.3110 | 40.5400 | C | 0 | 15.9370 | 37.9830 | 29.5470 | H | 0 |
| -1.1240 | 42.4010 | 37.8430 | C | 0 | 6.9710  | 37.7090 | 39.4420 | O | 0 | 15.5750 | 39.5380 | 28.8080 | H | 0 |
| -0.5960 | 41.3320 | 37.6650 | O | 0 | 6.1730  | 39.3170 | 40.7440 | N | 0 | 15.9800 | 39.2810 | 30.6280 | H | 0 |
| -0.8900 | 43.3570 | 38.7740 | N | 0 | 6.2060  | 39.6940 | 41.6810 | H | 0 | 13.6250 | 39.9710 | 30.7130 | C | 0 |
| -1.5370 | 44.1290 | 38.6950 | H | 0 | 5.4540  | 40.0120 | 39.6770 | C | 0 | 14.1690 | 40.7720 | 30.2140 | H | 0 |
| -0.1110 | 43.1680 | 40.0430 | C | 0 | 5.0530  | 39.2260 | 39.0370 | H | 0 | 12.5670 | 40.2340 | 30.6800 | H | 0 |
| 0.8970  | 43.0290 | 39.6510 | H | 0 | 4.3470  | 40.9590 | 40.2490 | C | 0 | 14.0390 | 39.9790 | 31.7210 | H | 0 |
| -0.0730 | 44.4790 | 40.8310 | C | 0 | 3.5240  | 40.2730 | 40.4490 | H | 0 | 13.8660 | 36.9410 | 28.2050 | C | 0 |
| 0.2790  | 45.2800 | 40.1810 | H | 0 | 4.6950  | 41.5800 | 41.0750 | H | 0 | 13.6400 | 35.8040 | 28.5270 | O | 0 |
| -1.0730 | 44.7870 | 41.1340 | H | 0 | 3.7690  | 41.8480 | 39.1780 | C | 0 | 14.7590 | 37.2230 | 27.2480 | N | 0 |
| 0.6710  | 44.4100 | 42.1430 | C | 0 | 2.8730  | 41.2700 | 38.3050 | C | 0 | 14.8650 | 38.2090 | 27.0600 | H | 0 |
| 2.0810  | 44.1000 | 42.1630 | C | 0 | 2.4920  | 40.2620 | 38.3800 | H | 0 | 15.6290 | 36.1550 | 26.7550 | C | 0 |

|         |         |         |   |   |         |         |         |   |   |         |         |         |   |   |
|---------|---------|---------|---|---|---------|---------|---------|---|---|---------|---------|---------|---|---|
| 15.6510 | 35.3390 | 27.4770 | H | 0 | 29.2040 | 43.2360 | 21.2190 | H | 0 | 32.5300 | 31.1220 | 20.9360 | O | 0 |
| 15.1310 | 35.6660 | 25.4050 | C | 0 | 28.6600 | 42.2240 | 19.9610 | H | 0 | 31.7020 | 34.2480 | 23.0610 | C | 0 |
| 14.2100 | 35.1810 | 25.7290 | H | 0 | 28.6000 | 44.3400 | 19.5000 | C | 0 | 31.1730 | 33.4630 | 23.9220 | O | 0 |
| 14.8170 | 36.5580 | 24.8630 | H | 0 | 29.6110 | 44.3880 | 18.5590 | N | 0 | 32.7110 | 35.0190 | 23.4180 | N | 0 |
| 16.0870 | 34.6700 | 24.6510 | C | 0 | 29.3980 | 45.4600 | 17.7620 | C | 0 | 33.0430 | 35.6520 | 22.7040 | H | 0 |
| 16.9790 | 35.2130 | 24.3380 | H | 0 | 30.0220 | 45.8070 | 16.9520 | H | 0 | 33.3210 | 35.1560 | 24.7760 | C | 0 |
| 16.5790 | 33.4450 | 25.4860 | C | 0 | 28.2970 | 46.1270 | 18.1740 | N | 0 | 33.6850 | 34.1580 | 25.0230 | H | 0 |
| 17.2930 | 32.9100 | 24.8590 | H | 0 | 27.8770 | 46.9460 | 17.7580 | H | 0 | 34.6540 | 35.9780 | 24.6980 | C | 0 |
| 17.1870 | 33.8010 | 26.3180 | H | 0 | 27.6960 | 45.3470 | 19.2360 | C | 0 | 34.3610 | 36.9560 | 24.3150 | H | 0 |
| 15.7500 | 32.8090 | 25.7960 | H | 0 | 26.7480 | 45.5700 | 19.7020 | H | 0 | 35.0370 | 36.0460 | 25.7160 | H | 0 |
| 15.3580 | 34.1380 | 23.4570 | C | 0 | 25.8940 | 42.8290 | 20.3530 | C | 0 | 35.7980 | 35.4910 | 23.8660 | C | 0 |
| 15.9430 | 33.3150 | 23.0470 | H | 0 | 25.9960 | 42.7050 | 19.0850 | O | 0 | 36.4580 | 36.4520 | 22.9890 | C | 0 |
| 14.4190 | 33.7060 | 23.8030 | H | 0 | 24.7230 | 42.7780 | 20.9170 | N | 0 | 36.1840 | 37.4910 | 22.8760 | H | 0 |
| 15.2400 | 34.8810 | 22.6680 | H | 0 | 24.7980 | 43.0040 | 21.8990 | H | 0 | 37.6240 | 36.0620 | 22.3380 | C | 0 |
| 17.0720 | 36.6480 | 26.6390 | C | 0 | 23.4630 | 42.2310 | 20.3020 | C | 0 | 38.2410 | 36.7240 | 21.7470 | H | 0 |
| 17.2300 | 37.5570 | 25.7840 | O | 0 | 22.7480 | 42.0240 | 21.0990 | H | 0 | 38.0600 | 34.6830 | 22.4200 | C | 0 |
| 18.0780 | 36.2210 | 27.4080 | N | 0 | 22.7660 | 43.2110 | 19.2840 | C | 0 | 39.3160 | 34.2280 | 22.0240 | O | 0 |
| 17.7680 | 35.5880 | 28.1310 | H | 0 | 23.3280 | 43.1710 | 18.3510 | H | 0 | 39.5030 | 34.5280 | 21.1320 | H | 0 |
| 19.5600 | 36.4910 | 27.3390 | C | 0 | 21.7890 | 42.8330 | 18.9820 | H | 0 | 37.3520 | 33.7470 | 23.1770 | C | 0 |
| 19.5940 | 37.5630 | 27.1460 | H | 0 | 22.5520 | 44.7050 | 19.7230 | C | 0 | 37.7990 | 32.8190 | 23.5010 | H | 0 |
| 20.2660 | 36.2610 | 28.6260 | C | 0 | 21.7240 | 45.0510 | 19.1030 | H | 0 | 36.2250 | 34.1720 | 23.9020 | C | 0 |
| 21.2700 | 36.6600 | 28.4830 | H | 0 | 22.2610 | 44.6900 | 20.7740 | H | 0 | 35.7300 | 33.4380 | 24.5210 | H | 0 |
| 19.7210 | 36.8430 | 29.3690 | H | 0 | 23.8560 | 45.5880 | 19.4490 | C | 0 | 32.4290 | 35.7410 | 25.9340 | C | 0 |
| 20.4330 | 34.8140 | 29.0870 | C | 0 | 24.1630 | 45.8300 | 18.2580 | O | 0 | 32.0800 | 36.9210 | 25.8380 | O | 0 |
| 19.4900 | 34.2880 | 29.2330 | H | 0 | 24.3940 | 46.1130 | 20.4510 | O | 0 | 31.9850 | 34.9110 | 26.9020 | N | 0 |
| 20.8690 | 34.2880 | 28.2380 | H | 0 | 23.4840 | 40.7480 | 19.8420 | C | 0 | 32.1650 | 33.9200 | 26.8210 | H | 0 |
| 21.5690 | 34.5680 | 30.5020 | S | 0 | 22.5350 | 40.2800 | 19.1880 | O | 0 | 30.9030 | 35.3210 | 27.7780 | C | 0 |
| 20.3120 | 34.9240 | 31.7340 | C | 0 | 24.5010 | 40.0110 | 20.2420 | N | 0 | 30.1540 | 35.9070 | 27.2450 | H | 0 |
| 19.4040 | 34.3450 | 31.5660 | H | 0 | 25.1080 | 40.5170 | 20.8720 | H | 0 | 29.9740 | 34.1620 | 28.2170 | C | 0 |
| 20.7030 | 34.8040 | 32.7440 | H | 0 | 24.7090 | 38.5730 | 20.0140 | C | 0 | 30.6460 | 33.3970 | 28.6050 | H | 0 |
| 20.0580 | 35.9820 | 31.7970 | H | 0 | 24.7780 | 38.1580 | 21.0200 | H | 0 | 29.3850 | 34.5000 | 29.0700 | H | 0 |
| 20.2990 | 35.6810 | 26.2490 | C | 0 | 23.7740 | 38.2300 | 19.5690 | H | 0 | 29.0550 | 33.5600 | 27.1580 | C | 0 |
| 19.7970 | 34.5370 | 25.9740 | O | 0 | 25.8570 | 38.2290 | 19.0680 | C | 0 | 27.8840 | 34.2840 | 26.7460 | C | 0 |
| 21.3460 | 36.1950 | 25.7100 | N | 0 | 26.0240 | 37.0470 | 18.8420 | O | 0 | 27.6370 | 35.2210 | 27.2240 | H | 0 |
| 21.5480 | 37.1530 | 25.9590 | H | 0 | 26.6600 | 39.1990 | 18.5660 | N | 0 | 26.9740 | 33.6920 | 25.8210 | C | 0 |
| 22.2580 | 35.7590 | 24.7420 | C | 0 | 26.4770 | 40.1790 | 18.7230 | H | 0 | 26.0210 | 34.1460 | 25.5950 | H | 0 |
| 22.3190 | 34.6780 | 24.8640 | H | 0 | 27.7720 | 39.0110 | 17.5610 | C | 0 | 27.3330 | 32.5750 | 25.1130 | C | 0 |
| 21.7030 | 35.9030 | 23.3120 | C | 0 | 27.3080 | 38.3400 | 16.8390 | H | 0 | 26.5080 | 32.1560 | 24.1700 | O | 0 |
| 22.5800 | 35.7860 | 22.6750 | H | 0 | 28.0390 | 40.3740 | 16.9330 | C | 0 | 27.0790 | 31.6350 | 23.6000 | H | 0 |
| 21.2220 | 34.9670 | 23.0290 | H | 0 | 28.0210 | 41.1540 | 17.6940 | H | 0 | 28.5600 | 31.8810 | 25.4420 | C | 0 |
| 20.9760 | 37.1380 | 22.8450 | C | 0 | 28.9880 | 40.3540 | 16.3980 | H | 0 | 28.8110 | 30.9970 | 24.8750 | H | 0 |
| 19.5770 | 37.3170 | 22.9510 | C | 0 | 26.9040 | 40.7280 | 15.9820 | C | 0 | 29.3640 | 32.3970 | 26.4790 | C | 0 |
| 18.8820 | 36.5290 | 23.2020 | H | 0 | 27.0070 | 39.9660 | 15.2090 | H | 0 | 30.3300 | 31.9380 | 26.6290 | H | 0 |
| 19.0310 | 38.5120 | 22.6290 | C | 0 | 25.8750 | 40.6530 | 16.3310 | H | 0 | 31.3180 | 36.1870 | 28.9590 | C | 0 |
| 17.9540 | 38.4800 | 22.5560 | H | 0 | 27.1300 | 42.0740 | 15.2810 | C | 0 | 30.5560 | 36.6470 | 29.7760 | O | 0 |
| 19.8070 | 39.6290 | 22.3460 | C | 0 | 28.1490 | 42.2000 | 14.9140 | H | 0 | 32.6520 | 36.4760 | 29.0240 | N | 0 |
| 19.2070 | 40.8420 | 22.1110 | O | 0 | 26.3890 | 42.2080 | 14.4930 | H | 0 | 33.2490 | 35.9090 | 28.4410 | H | 0 |
| 18.2860 | 40.6700 | 21.9010 | H | 0 | 27.1160 | 43.2770 | 16.2590 | C | 0 | 33.1840 | 37.4670 | 29.9440 | C | 0 |
| 21.1770 | 39.5300 | 22.3390 | C | 0 | 27.5090 | 43.0320 | 17.2450 | H | 0 | 32.5930 | 38.3730 | 30.0730 | H | 0 |
| 21.8110 | 40.4040 | 22.3110 | H | 0 | 27.7560 | 44.0510 | 15.8360 | H | 0 | 33.2000 | 36.9890 | 30.9240 | H | 0 |
| 21.7810 | 38.2500 | 22.5810 | C | 0 | 25.7270 | 43.8390 | 16.4180 | N | 0 | 34.6170 | 37.9680 | 29.6240 | C | 0 |
| 22.8560 | 38.1540 | 22.5480 | H | 0 | 25.1150 | 43.2390 | 16.9510 | H | 0 | 35.1480 | 37.6090 | 28.5530 | O | 0 |
| 23.5510 | 36.5320 | 24.9560 | C | 0 | 25.8800 | 44.5610 | 17.1070 | H | 0 | 35.1930 | 38.7410 | 30.5640 | N | 0 |
| 23.7040 | 37.4550 | 25.8010 | O | 0 | 25.3760 | 44.2570 | 15.5680 | H | 0 | 34.5780 | 39.0350 | 31.3100 | H | 0 |
| 24.6030 | 36.1790 | 24.1940 | N | 0 | 28.9770 | 38.4380 | 18.1820 | C | 0 | 36.6190 | 39.1700 | 30.5760 | C | 0 |
| 24.5230 | 35.4050 | 23.5500 | H | 0 | 29.7390 | 37.8610 | 17.4520 | O | 0 | 37.1470 | 38.2810 | 30.2310 | H | 0 |
| 25.9720 | 36.7610 | 24.2450 | C | 0 | 29.1540 | 38.5030 | 19.4840 | N | 0 | 36.8420 | 40.3940 | 29.6190 | C | 0 |
| 26.3960 | 36.6610 | 25.2440 | H | 0 | 28.5020 | 39.0540 | 20.0240 | H | 0 | 36.6560 | 39.9260 | 28.6520 | H | 0 |
| 26.7810 | 35.9980 | 23.2330 | C | 0 | 30.1940 | 37.8620 | 20.2780 | C | 0 | 36.0920 | 41.1840 | 29.6630 | H | 0 |
| 27.8110 | 36.1690 | 23.5470 | H | 0 | 31.0790 | 38.0220 | 19.6620 | H | 0 | 37.8710 | 40.7300 | 29.7430 | H | 0 |
| 26.4540 | 34.9830 | 23.4570 | H | 0 | 30.4030 | 38.6070 | 21.5800 | C | 0 | 37.0770 | 39.6020 | 31.9830 | C | 0 |
| 26.5770 | 36.2960 | 21.8700 | O | 0 | 29.4020 | 38.6440 | 22.0100 | H | 0 | 36.2090 | 40.0640 | 32.7360 | O | 0 |
| 27.4120 | 36.6720 | 21.5820 | H | 0 | 31.0370 | 38.1620 | 22.3470 | H | 0 | 38.3340 | 39.5230 | 32.2000 | N | 0 |
| 26.0340 | 38.2660 | 23.8230 | C | 0 | 30.8090 | 40.1040 | 21.4500 | C | 0 | 38.7710 | 39.4020 | 31.2970 | H | 0 |
| 25.1000 | 39.0210 | 23.5400 | O | 0 | 30.8960 | 40.7300 | 20.3640 | O | 0 | 39.0050 | 40.2430 | 33.3170 | C | 0 |
| 27.2170 | 38.8860 | 23.9160 | N | 0 | 31.0990 | 40.6620 | 22.5170 | O | 0 | 38.3380 | 40.7770 | 33.9940 | H | 0 |
| 27.9590 | 38.3410 | 24.3310 | H | 0 | 29.9950 | 36.3900 | 20.5980 | C | 0 | 39.7930 | 39.2270 | 34.2390 | C | 0 |
| 27.4790 | 40.3380 | 23.7760 | C | 0 | 28.8910 | 35.8330 | 20.4640 | O | 0 | 38.9890 | 38.6490 | 34.6940 | H | 0 |
| 26.7460 | 40.9200 | 24.3350 | H | 0 | 31.0110 | 35.7620 | 21.1080 | N | 0 | 40.1260 | 38.3810 | 33.6370 | H | 0 |
| 28.4630 | 40.6310 | 24.1430 | H | 0 | 31.8980 | 36.2420 | 21.0690 | H | 0 | 40.9340 | 39.7860 | 35.1770 | C | 0 |
| 27.2470 | 40.9370 | 22.3530 | C | 0 | 31.0350 | 34.3490 | 21.6510 | C | 0 | 42.2770 | 39.4110 | 34.9710 | C | 0 |
| 27.2180 | 40.2320 | 21.3530 | O | 0 | 30.0390 | 33.9600 | 21.8620 | H | 0 | 42.5340 | 38.8150 | 34.1070 | H | 0 |
| 27.2150 | 42.3010 | 22.3430 | N | 0 | 31.7610 | 33.4030 | 20.6520 | C | 0 | 43.3260 | 39.7750 | 35.8550 | C | 0 |
| 27.3140 | 42.7170 | 23.2580 | H | 0 | 31.4120 | 33.5590 | 19.6320 | H | 0 | 44.3370 | 39.4160 | 35.7270 | H | 0 |
| 27.0810 | 43.1560 | 21.1790 | C | 0 | 32.8260 | 33.6340 | 20.6570 | H | 0 | 43.0100 | 40.7000 | 36.8640 | C | 0 |
| 27.0030 | 44.1930 | 21.5040 | H | 0 | 31.5440 | 31.9080 | 20.9990 | C | 0 | 43.8320 | 41.0380 | 37.4770 | H | 0 |
| 28.4620 | 43.1920 | 20.4220 | C | 0 | 30.4540 | 31.4830 | 21.4830 | O | 0 | 41.6560 | 41.0780 | 37.1230 | C | 0 |

|         |         |         |   |   |         |         |         |   |   |         |         |         |   |   |
|---------|---------|---------|---|---|---------|---------|---------|---|---|---------|---------|---------|---|---|
| 41.4050 | 41.7820 | 37.9030 | H | 0 | 37.4060 | 56.5680 | 36.5830 | O | 0 | 41.1910 | 48.6890 | 28.5450 | H | 0 |
| 40.6720 | 40.6770 | 36.2380 | C | 0 | 39.6550 | 56.5750 | 37.0660 | N | 0 | 39.1670 | 48.6410 | 29.2070 | C | 0 |
| 39.6320 | 40.9330 | 36.3760 | H | 0 | 40.5000 | 56.0420 | 37.2110 | H | 0 | 39.3700 | 48.1370 | 30.1510 | H | 0 |
| 39.8380 | 41.3740 | 32.6830 | C | 0 | 39.8030 | 58.0100 | 37.2970 | C | 0 | 38.4150 | 49.4110 | 29.3790 | H | 0 |
| 40.5500 | 41.1720 | 31.7330 | O | 0 | 38.9680 | 58.3370 | 37.9180 | H | 0 | 38.6760 | 47.5620 | 28.1860 | C | 0 |
| 39.7930 | 42.6330 | 33.2350 | N | 0 | 41.1710 | 58.2510 | 38.0000 | C | 0 | 38.7400 | 47.9730 | 27.1780 | H | 0 |
| 39.0590 | 42.7890 | 33.9110 | H | 0 | 41.2100 | 57.5900 | 38.8660 | H | 0 | 39.3200 | 46.7000 | 28.3550 | H | 0 |
| 40.4890 | 43.7920 | 32.6470 | C | 0 | 42.0220 | 57.9100 | 37.4110 | H | 0 | 37.3760 | 47.1190 | 28.5820 | N | 0 |
| 41.2270 | 43.5420 | 31.8850 | H | 0 | 41.4450 | 59.6610 | 38.4200 | C | 0 | 36.8980 | 47.7510 | 29.2080 | H | 0 |
| 39.5130 | 44.7600 | 31.8990 | C | 0 | 41.6250 | 60.2560 | 37.5250 | H | 0 | 36.7730 | 46.0640 | 28.1770 | C | 0 |
| 40.1440 | 45.3930 | 31.2760 | H | 0 | 40.3020 | 60.3320 | 39.1960 | C | 0 | 37.3010 | 45.4150 | 27.1930 | N | 0 |
| 38.6150 | 44.0580 | 30.8760 | C | 0 | 39.4200 | 60.3630 | 38.5570 | H | 0 | 38.1500 | 45.6850 | 26.7180 | H | 0 |
| 38.1370 | 44.6560 | 30.1000 | H | 0 | 40.1260 | 59.6440 | 40.0230 | H | 0 | 37.0110 | 44.5390 | 26.7830 | H | 0 |
| 39.2060 | 43.3130 | 30.3420 | H | 0 | 40.6570 | 61.3140 | 39.5100 | H | 0 | 35.6630 | 45.7120 | 28.6800 | N | 0 |
| 37.8700 | 43.4030 | 31.3280 | H | 0 | 42.6400 | 59.7040 | 39.2990 | C | 0 | 35.3770 | 46.1360 | 29.5520 | H | 0 |
| 38.6930 | 45.6020 | 32.8590 | C | 0 | 43.5090 | 59.2430 | 38.8300 | H | 0 | 35.1660 | 45.0040 | 28.1590 | H | 0 |
| 38.2660 | 45.0100 | 33.6680 | H | 0 | 42.9280 | 60.6950 | 39.6480 | H | 0 | 42.3490 | 50.5540 | 29.7050 | C | 0 |
| 39.4050 | 46.2130 | 33.4130 | H | 0 | 42.4500 | 59.2300 | 40.2620 | H | 0 | 42.8430 | 51.4270 | 29.0020 | O | 0 |
| 37.4410 | 46.2890 | 32.3530 | C | 0 | 39.5400 | 58.8820 | 36.0420 | C | 0 | 43.1260 | 49.6270 | 30.2750 | N | 0 |
| 37.1430 | 47.0920 | 30.0260 | H | 0 | 38.8240 | 59.9060 | 36.0600 | O | 0 | 42.6340 | 48.9690 | 30.8630 | H | 0 |
| 37.7420 | 46.8790 | 31.4870 | H | 0 | 39.9160 | 58.3530 | 34.8030 | N | 0 | 44.5590 | 49.3980 | 30.2220 | C | 0 |
| 36.6020 | 45.6110 | 32.1950 | H | 0 | 40.4650 | 57.5100 | 34.7080 | H | 0 | 45.0070 | 50.2570 | 29.7230 | H | 0 |
| 41.3860 | 44.4950 | 33.7090 | C | 0 | 39.3810 | 58.9810 | 33.5330 | C | 0 | 45.2230 | 49.4500 | 31.6440 | C | 0 |
| 41.0700 | 44.3480 | 34.9760 | O | 0 | 38.8850 | 59.9260 | 33.7550 | H | 0 | 44.6490 | 48.7360 | 32.2340 | H | 0 |
| 42.2270 | 45.4250 | 33.2460 | N | 0 | 40.4720 | 59.3320 | 32.5800 | C | 0 | 46.7170 | 48.9490 | 31.6820 | C | 0 |
| 42.3730 | 45.4180 | 32.2470 | H | 0 | 40.7540 | 58.4140 | 32.0640 | H | 0 | 47.1410 | 49.2840 | 32.6290 | H | 0 |
| 42.7140 | 46.5530 | 33.9920 | C | 0 | 39.9550 | 59.9260 | 31.8270 | H | 0 | 46.7760 | 47.8640 | 31.7710 | H | 0 |
| 42.3670 | 46.4680 | 35.0220 | H | 0 | 41.6540 | 60.0550 | 33.1600 | C | 0 | 47.3780 | 49.2900 | 30.8860 | H | 0 |
| 44.2310 | 46.5140 | 34.0260 | C | 0 | 41.4330 | 60.5310 | 34.1150 | H | 0 | 45.2100 | 50.8280 | 32.2630 | C | 0 |
| 44.4330 | 45.5570 | 34.5070 | H | 0 | 42.3530 | 59.2280 | 33.2880 | H | 0 | 45.6400 | 50.6670 | 33.2510 | H | 0 |
| 44.5760 | 46.6270 | 32.9980 | H | 0 | 42.4480 | 61.1010 | 32.3570 | C | 0 | 45.6880 | 51.5860 | 31.6410 | H | 0 |
| 44.8650 | 47.8600 | 35.0700 | S | 0 | 41.8930 | 62.0340 | 32.2600 | H | 0 | 44.1710 | 51.1070 | 32.4420 | H | 0 |
| 44.6720 | 47.5240 | 36.3490 | H | 0 | 43.3500 | 61.1980 | 32.9620 | H | 0 | 44.9070 | 48.1220 | 29.3890 | C | 0 |
| 42.0830 | 47.8880 | 33.4530 | C | 0 | 42.8200 | 60.5370 | 30.9290 | C | 0 | 45.7760 | 48.1180 | 28.4980 | O | 0 |
| 41.8070 | 48.0030 | 32.2220 | O | 0 | 43.4660 | 59.6590 | 30.9290 | H | 0 | 44.3470 | 46.8960 | 29.7450 | N | 0 |
| 41.7960 | 48.9070 | 34.3430 | N | 0 | 41.8450 | 60.4270 | 30.4540 | H | 0 | 43.8140 | 46.7740 | 30.5940 | H | 0 |
| 42.0540 | 48.8680 | 35.3190 | H | 0 | 43.6490 | 61.5320 | 30.3110 | N | 0 | 44.4620 | 45.6960 | 28.9500 | C | 0 |
| 41.0480 | 50.0410 | 33.9390 | C | 0 | 44.5120 | 61.7690 | 30.7790 | H | 0 | 44.2790 | 45.8650 | 27.8890 | H | 0 |
| 41.2460 | 50.3850 | 32.9240 | H | 0 | 43.9640 | 61.2150 | 29.4060 | H | 0 | 45.8210 | 45.0160 | 29.1540 | C | 0 |
| 39.5420 | 49.5570 | 34.0240 | C | 0 | 43.2310 | 62.4490 | 30.2410 | H | 0 | 45.8720 | 44.0550 | 28.6400 | H | 0 |
| 39.5520 | 48.6620 | 33.4020 | H | 0 | 38.3490 | 58.0780 | 32.9510 | C | 0 | 46.6050 | 45.6800 | 28.7900 | H | 0 |
| 39.3650 | 49.1830 | 35.0320 | H | 0 | 37.6760 | 58.5100 | 32.0310 | O | 0 | 46.2200 | 44.7060 | 30.6080 | C | 0 |
| 38.5030 | 50.6430 | 33.6730 | C | 0 | 38.2000 | 56.7950 | 33.3800 | N | 0 | 47.2300 | 45.3800 | 31.1700 | C | 0 |
| 37.9480 | 50.6620 | 32.4360 | C | 0 | 38.6670 | 56.5080 | 34.2280 | H | 0 | 47.8960 | 46.1270 | 30.7650 | H | 0 |
| 38.2600 | 49.9370 | 31.7000 | H | 0 | 37.2660 | 55.7620 | 32.8610 | C | 0 | 47.2880 | 45.0260 | 32.4760 | N | 0 |
| 36.7630 | 51.4100 | 32.1550 | C | 0 | 37.2180 | 54.9970 | 33.6370 | H | 0 | 47.9430 | 45.4300 | 33.1300 | H | 0 |
| 36.2520 | 51.4710 | 31.2060 | H | 0 | 36.2350 | 56.1050 | 32.7740 | H | 0 | 46.4370 | 44.0170 | 32.8170 | C | 0 |
| 36.2590 | 52.2070 | 33.2280 | C | 0 | 37.6080 | 55.0950 | 31.5380 | C | 0 | 46.1660 | 43.3480 | 34.0350 | C | 0 |
| 35.2790 | 53.0210 | 32.8630 | O | 0 | 36.7030 | 54.8230 | 30.7640 | O | 0 | 46.6750 | 43.6100 | 34.9510 | H | 0 |
| 35.0730 | 53.7330 | 33.4730 | H | 0 | 38.8560 | 54.6150 | 31.3710 | N | 0 | 45.0700 | 42.4840 | 34.1160 | C | 0 |
| 36.7660 | 52.0790 | 34.5950 | C | 0 | 39.4920 | 54.8930 | 32.1040 | H | 0 | 44.8330 | 42.0910 | 35.0940 | H | 0 |
| 36.3720 | 52.6660 | 35.4110 | H | 0 | 39.5040 | 54.0000 | 30.2540 | C | 0 | 44.2800 | 42.2480 | 33.0110 | C | 0 |
| 37.9490 | 51.3250 | 34.7370 | C | 0 | 38.7360 | 53.7360 | 29.5270 | H | 0 | 43.4160 | 41.6220 | 33.1760 | H | 0 |
| 38.4160 | 51.3690 | 35.7100 | H | 0 | 40.6020 | 55.0170 | 29.6820 | C | 0 | 44.6110 | 42.8380 | 31.7930 | C | 0 |
| 41.2400 | 51.2000 | 34.8370 | C | 0 | 41.3120 | 55.1710 | 30.4950 | H | 0 | 44.0400 | 42.7570 | 30.8800 | H | 0 |
| 41.0240 | 51.1880 | 36.0400 | O | 0 | 41.0340 | 54.4500 | 28.8570 | H | 0 | 45.7220 | 43.7970 | 31.6400 | C | 0 |
| 41.8530 | 52.2150 | 34.2940 | N | 0 | 39.9190 | 56.3150 | 29.1890 | C | 0 | 43.3230 | 44.7900 | 29.2820 | C | 0 |
| 41.7410 | 52.3110 | 33.2950 | H | 0 | 39.1010 | 56.0670 | 28.5120 | H | 0 | 42.5810 | 45.1040 | 30.2040 | O | 0 |
| 41.9210 | 53.5520 | 34.8860 | C | 0 | 39.4800 | 56.9160 | 29.9850 | H | 0 | 43.0470 | 43.7420 | 28.5800 | N | 0 |
| 42.4690 | 53.5610 | 35.8280 | H | 0 | 40.8620 | 57.1340 | 28.3740 | C | 0 | 43.7280 | 43.4570 | 27.8910 | H | 0 |
| 42.7750 | 54.5630 | 34.0250 | C | 0 | 40.3570 | 58.0770 | 28.1650 | H | 0 | 41.9080 | 42.7950 | 28.8060 | C | 0 |
| 43.7650 | 54.1250 | 33.8950 | H | 0 | 41.7270 | 57.3270 | 29.0090 | H | 0 | 41.6240 | 42.8940 | 29.8540 | H | 0 |
| 42.3760 | 54.6700 | 33.0160 | H | 0 | 41.1960 | 56.5450 | 26.9270 | C | 0 | 40.7190 | 43.4080 | 28.0500 | C | 0 |
| 42.8980 | 55.8920 | 34.7280 | C | 0 | 41.3570 | 55.4740 | 27.0420 | H | 0 | 39.7980 | 42.8590 | 28.2470 | H | 0 |
| 42.9430 | 55.9320 | 35.9840 | O | 0 | 40.3020 | 56.6640 | 26.3150 | H | 0 | 40.5380 | 44.4020 | 28.4600 | H | 0 |
| 43.0440 | 56.9080 | 34.0250 | O | 0 | 42.3160 | 57.1960 | 26.2820 | N | 0 | 40.9480 | 43.4600 | 26.5030 | C | 0 |
| 40.5580 | 54.2800 | 35.1190 | C | 0 | 42.3930 | 56.8270 | 25.3450 | H | 0 | 41.9870 | 43.7080 | 26.2860 | H | 0 |
| 40.0610 | 55.0300 | 34.2730 | O | 0 | 42.2170 | 58.1740 | 26.0510 | H | 0 | 40.7140 | 42.5090 | 26.0240 | H | 0 |
| 39.7810 | 53.9480 | 36.1870 | N | 0 | 43.1360 | 57.1560 | 26.8710 | H | 0 | 40.2000 | 44.6180 | 25.8690 | C | 0 |
| 40.0750 | 53.0680 | 36.5880 | H | 0 | 40.1730 | 52.7000 | 30.6060 | C | 0 | 39.2440 | 44.3230 | 25.1570 | O | 0 |
| 38.4850 | 54.4750 | 36.5370 | C | 0 | 40.9180 | 52.6130 | 31.5810 | O | 0 | 40.5420 | 45.8150 | 26.1110 | O | 0 |
| 37.7110 | 54.2970 | 35.7900 | H | 0 | 40.1040 | 51.6420 | 29.7480 | N | 0 | 42.1630 | 41.3370 | 28.3910 | C | 0 |
| 37.8280 | 53.8980 | 37.8370 | C | 0 | 39.5630 | 51.7880 | 28.9070 | H | 0 | 42.7310 | 41.0900 | 27.3250 | O | 0 |
| 37.9380 | 52.8170 | 37.7630 | H | 0 | 40.8860 | 50.4110 | 29.8110 | C | 0 | 41.8470 | 40.3330 | 29.2230 | N | 0 |
| 38.4630 | 54.2500 | 38.6500 | H | 0 | 40.6330 | 49.9490 | 30.7650 | H | 0 | 41.5100 | 40.5720 | 30.1450 | H | 0 |
| 36.7760 | 54.1590 | 37.9590 | H | 0 | 40.4060 | 49.4170 | 28.7530 | C | 0 | 41.9910 | 38.9510 | 28.8990 | C | 0 |
| 38.5080 | 56.0240 | 36.6920 | C | 0 | 40.2380 | 49.9580 | 27.8210 | H | 0 | 42.4970 | 38.7970 | 27.9460 | H | 0 |



|         |         |         |   |   |         |         |         |   |   |         |         |         |   |   |
|---------|---------|---------|---|---|---------|---------|---------|---|---|---------|---------|---------|---|---|
| 42.7040 | 38.1620 | 29.9600 | C | 0 | 33.0350 | 26.3000 | 29.0710 | H | 0 | 38.4030 | 38.8260 | 42.5860 | C | 0 |
| 42.1560 | 38.3880 | 30.8750 | H | 0 | 34.1380 | 27.7830 | 30.0590 | C | 0 | 38.9750 | 38.1680 | 43.4940 | O | 0 |
| 42.7540 | 36.6060 | 29.8290 | C | 0 | 35.0550 | 27.2370 | 29.8950 | H | 0 | 39.1110 | 39.5440 | 41.6310 | N | 0 |
| 41.7900 | 36.1700 | 29.5670 | H | 0 | 34.0160 | 28.9520 | 30.7760 | C | 0 | 38.5420 | 40.1620 | 40.4430 | C | 0 |
| 43.5880 | 36.4480 | 29.1450 | H | 0 | 34.8660 | 29.4000 | 31.2680 | H | 0 | 38.2080 | 41.1730 | 40.6790 | H | 0 |
| 42.8910 | 36.1460 | 30.8080 | H | 0 | 32.6480 | 33.5260 | 31.3590 | C | 0 | 37.7070 | 39.5900 | 40.0420 | H | 0 |
| 44.1540 | 38.7640 | 30.0650 | C | 0 | 33.6540 | 34.2180 | 31.4130 | O | 0 | 39.6020 | 40.1660 | 39.3590 | C | 0 |
| 44.7210 | 38.3960 | 29.2100 | H | 0 | 31.5140 | 33.9100 | 31.9730 | N | 0 | 39.4850 | 41.0430 | 38.7220 | H | 0 |
| 44.1500 | 39.8470 | 29.9380 | H | 0 | 30.2360 | 33.2290 | 31.8790 | C | 0 | 39.6530 | 39.2280 | 38.8070 | H | 0 |
| 44.8280 | 38.3860 | 31.3120 | C | 0 | 30.2720 | 32.1400 | 31.8390 | H | 0 | 40.9170 | 40.2060 | 40.2120 | C | 0 |
| 44.9720 | 37.3110 | 31.4280 | H | 0 | 29.6470 | 33.5590 | 31.0240 | H | 0 | 41.1630 | 41.2590 | 40.3510 | H | 0 |
| 45.8080 | 38.8620 | 31.2740 | H | 0 | 29.5190 | 33.4930 | 33.1920 | C | 0 | 41.6730 | 39.7150 | 39.6000 | H | 0 |
| 44.3360 | 38.8240 | 32.1800 | H | 0 | 29.8400 | 32.7530 | 33.9260 | H | 0 | 40.5800 | 39.4660 | 41.4930 | C | 0 |
| 40.5060 | 38.6120 | 28.7730 | C | 0 | 28.4400 | 33.4830 | 33.0350 | H | 0 | 41.0170 | 38.4680 | 41.4760 | H | 0 |
| 39.7290 | 38.7400 | 29.7590 | O | 0 | 29.9950 | 34.9100 | 33.5130 | C | 0 | 41.3750 | 40.0720 | 42.6590 | C | 0 |
| 40.0740 | 38.1900 | 27.5940 | N | 0 | 29.9960 | 35.1160 | 34.5840 | H | 0 | 40.7770 | 40.8190 | 43.4390 | O | 0 |
| 40.7210 | 38.1590 | 26.8190 | H | 0 | 29.3660 | 35.6280 | 32.9870 | H | 0 | 42.5800 | 39.6640 | 42.9480 | N | 0 |
| 38.7200 | 37.5830 | 27.4290 | C | 0 | 31.4620 | 35.0430 | 32.9560 | C | 0 | 42.9150 | 38.9860 | 42.2790 | H | 0 |
| 37.9590 | 38.1950 | 27.9120 | H | 0 | 31.5390 | 36.0410 | 32.5230 | H | 0 | 43.4940 | 40.4080 | 43.8510 | C | 0 |
| 38.3040 | 37.6700 | 25.9630 | C | 0 | 32.5230 | 34.8590 | 34.0400 | C | 0 | 42.9290 | 41.2560 | 44.2380 | H | 0 |
| 39.0470 | 37.0950 | 25.4100 | H | 0 | 32.7510 | 33.7520 | 34.4530 | O | 0 | 43.7660 | 39.4350 | 44.9730 | C | 0 |
| 37.3550 | 37.1420 | 25.8630 | H | 0 | 33.1220 | 35.9490 | 34.5070 | N | 0 | 42.8400 | 39.1090 | 45.4470 | H | 0 |
| 38.1940 | 39.0400 | 25.3380 | C | 0 | 32.6290 | 36.8120 | 34.3280 | H | 0 | 44.4290 | 38.1170 | 44.5730 | C | 0 |
| 39.2650 | 39.6760 | 24.7570 | N | 0 | 34.0630 | 35.9440 | 35.6410 | C | 0 | 43.7430 | 37.5870 | 43.9120 | H | 0 |
| 38.8880 | 40.9350 | 24.5190 | C | 0 | 34.5220 | 34.9580 | 35.7110 | H | 0 | 45.3690 | 38.3460 | 44.0720 | H | 0 |
| 39.4380 | 41.6530 | 23.9300 | H | 0 | 35.1730 | 36.9830 | 35.2860 | C | 0 | 44.6650 | 37.5080 | 45.4460 | H | 0 |
| 37.6110 | 41.0690 | 24.8460 | N | 0 | 34.8080 | 38.0100 | 35.3080 | H | 0 | 44.5650 | 40.0180 | 46.1240 | C | 0 |
| 37.0610 | 41.9070 | 24.7240 | H | 0 | 36.3590 | 36.8010 | 36.1630 | C | 0 | 44.0120 | 40.8300 | 46.5960 | H | 0 |
| 37.1660 | 39.9130 | 25.3780 | C | 0 | 36.1270 | 36.9940 | 37.2100 | H | 0 | 44.5770 | 39.1950 | 46.8380 | H | 0 |
| 36.2060 | 39.8040 | 25.8600 | H | 0 | 36.7730 | 35.8080 | 35.9860 | H | 0 | 45.5360 | 40.3120 | 45.7250 | H | 0 |
| 38.6550 | 36.1830 | 28.0680 | C | 0 | 37.2270 | 37.3960 | 35.8800 | H | 0 | 44.7880 | 40.8410 | 43.1110 | C | 0 |
| 39.6280 | 35.4600 | 28.2230 | O | 0 | 35.7740 | 36.7970 | 33.8830 | C | 0 | 45.1160 | 40.3180 | 42.0680 | O | 0 |
| 37.4390 | 35.7380 | 28.3300 | N | 0 | 36.6430 | 37.4190 | 33.6660 | H | 0 | 45.5190 | 41.8470 | 43.6550 | N | 0 |
| 36.5980 | 36.2850 | 28.2110 | H | 0 | 36.0640 | 35.7710 | 33.6560 | H | 0 | 45.3520 | 42.0960 | 44.6200 | H | 0 |
| 37.1630 | 34.4040 | 28.8240 | C | 0 | 35.0780 | 37.1330 | 33.1140 | H | 0 | 46.6470 | 42.5620 | 42.9600 | C | 0 |
| 37.9610 | 33.6760 | 28.6790 | H | 0 | 33.2390 | 36.1210 | 36.8650 | C | 0 | 46.8920 | 41.8870 | 42.1400 | H | 0 |
| 36.9700 | 34.5570 | 30.3980 | C | 0 | 32.9080 | 37.2580 | 37.1600 | O | 0 | 46.2730 | 43.7660 | 42.1190 | C | 0 |
| 36.1410 | 35.2510 | 30.5370 | H | 0 | 33.0510 | 35.0360 | 37.6040 | N | 0 | 45.3960 | 43.5070 | 41.5260 | H | 0 |
| 36.6080 | 33.6430 | 30.8690 | H | 0 | 33.5040 | 34.1700 | 37.3480 | H | 0 | 45.6820 | 44.9630 | 42.9350 | C | 0 |
| 38.2030 | 35.0950 | 31.2250 | C | 0 | 32.3050 | 35.0330 | 38.8620 | C | 0 | 45.0220 | 44.5620 | 43.7040 | H | 0 |
| 38.5490 | 36.0050 | 30.7360 | H | 0 | 31.8570 | 36.0250 | 38.9240 | H | 0 | 46.4560 | 45.5390 | 43.4420 | H | 0 |
| 37.9760 | 35.3090 | 32.2690 | H | 0 | 31.1920 | 33.9150 | 38.8320 | C | 0 | 45.0780 | 45.5670 | 42.2580 | H | 0 |
| 39.3550 | 34.1110 | 31.3410 | C | 0 | 30.8950 | 33.7290 | 37.8000 | H | 0 | 47.3800 | 44.2860 | 41.2570 | C | 0 |
| 39.1290 | 32.9280 | 30.9370 | O | 0 | 31.7490 | 33.0080 | 39.0680 | H | 0 | 47.8610 | 43.4930 | 40.6830 | H | 0 |
| 40.5360 | 34.3490 | 31.6840 | O | 0 | 30.0110 | 34.2290 | 39.6230 | C | 0 | 46.8370 | 44.9050 | 40.5440 | H | 0 |
| 35.9850 | 33.7260 | 28.1060 | C | 0 | 29.8750 | 34.0890 | 40.9750 | C | 0 | 48.0400 | 44.7410 | 41.9950 | H | 0 |
| 35.0880 | 34.4040 | 27.6600 | O | 0 | 30.6080 | 33.6080 | 41.6060 | H | 0 | 47.7880 | 42.8190 | 43.9640 | C | 0 |
| 36.0240 | 32.4020 | 27.9920 | N | 0 | 28.6330 | 34.5160 | 41.3810 | N | 0 | 47.5810 | 43.3190 | 45.0880 | O | 0 |
| 36.8920 | 31.9230 | 28.1810 | H | 0 | 28.1760 | 34.4170 | 42.2760 | H | 0 | 49.0690 | 42.5510 | 43.5510 | N | 0 |
| 34.8160 | 31.7090 | 27.3390 | C | 0 | 27.9740 | 35.1120 | 40.3570 | C | 0 | 49.1720 | 42.3170 | 42.5740 | H | 0 |
| 34.6230 | 32.1240 | 26.3500 | H | 0 | 26.7690 | 35.8010 | 40.2870 | C | 0 | 50.3000 | 42.5240 | 44.3320 | C | 0 |
| 35.2300 | 30.2770 | 27.2470 | C | 0 | 26.2020 | 36.0700 | 41.1670 | H | 0 | 50.0400 | 42.8070 | 45.3520 | H | 0 |
| 35.6690 | 29.9320 | 28.1840 | H | 0 | 26.2900 | 36.2230 | 39.0330 | C | 0 | 51.0700 | 41.2600 | 44.2790 | C | 0 |
| 34.4050 | 29.5820 | 27.0930 | H | 0 | 25.2990 | 36.6330 | 38.9120 | H | 0 | 51.9510 | 41.4370 | 44.8950 | H | 0 |
| 36.1900 | 30.0100 | 26.1280 | C | 0 | 27.0240 | 35.8710 | 37.8700 | C | 0 | 50.3990 | 39.9990 | 44.7590 | C | 0 |
| 37.4200 | 29.3520 | 26.2340 | N | 0 | 26.5670 | 36.1140 | 36.9220 | H | 0 | 51.0770 | 39.1630 | 44.5870 | H | 0 |
| 37.8870 | 29.3380 | 24.9690 | C | 0 | 28.3040 | 35.2820 | 37.9380 | C | 0 | 50.2300 | 40.2420 | 45.8080 | H | 0 |
| 38.8560 | 28.9320 | 24.7190 | H | 0 | 28.7720 | 35.1020 | 36.9820 | H | 0 | 49.4660 | 39.9330 | 44.2000 | H | 0 |
| 36.9450 | 29.9210 | 24.1360 | N | 0 | 28.7870 | 34.8340 | 39.1910 | C | 0 | 51.5760 | 41.0790 | 43.0090 | O | 0 |
| 37.0010 | 29.9460 | 23.1280 | H | 0 | 33.2610 | 35.0530 | 40.0740 | C | 0 | 50.8330 | 41.2390 | 42.4230 | H | 0 |
| 35.9520 | 30.4450 | 24.8820 | C | 0 | 32.8000 | 34.9510 | 41.2020 | O | 0 | 51.3350 | 43.6120 | 43.9510 | C | 0 |
| 34.9860 | 30.8090 | 24.5660 | H | 0 | 34.5420 | 35.3850 | 39.8930 | N | 0 | 51.4620 | 43.9780 | 42.7880 | O | 0 |
| 33.5890 | 31.7080 | 28.3030 | C | 0 | 34.9160 | 35.4240 | 38.9550 | H | 0 | 52.0170 | 44.1310 | 45.0290 | N | 0 |
| 32.4630 | 31.5260 | 27.7730 | O | 0 | 35.5130 | 35.5280 | 40.9810 | C | 0 | 51.7340 | 43.8240 | 45.9490 | H | 0 |
| 33.7420 | 32.0110 | 29.6010 | N | 0 | 35.0050 | 35.2980 | 41.9170 | H | 0 | 53.1750 | 45.0950 | 44.7870 | C | 0 |
| 34.6920 | 32.0460 | 29.9410 | H | 0 | 36.6540 | 34.5290 | 40.7770 | C | 0 | 52.7110 | 46.0090 | 44.4140 | H | 0 |
| 32.6320 | 32.1900 | 30.5430 | C | 0 | 36.2860 | 33.5410 | 41.0550 | H | 0 | 53.7960 | 45.3160 | 46.1050 | C | 0 |
| 31.7080 | 32.0490 | 29.9820 | H | 0 | 36.9030 | 34.6280 | 39.7200 | H | 0 | 54.5310 | 46.0940 | 45.9010 | H | 0 |
| 32.7950 | 31.0250 | 31.5360 | C | 0 | 37.7960 | 34.7680 | 41.5770 | O | 0 | 53.0150 | 45.6150 | 46.8040 | H | 0 |
| 33.7260 | 31.1320 | 32.0930 | H | 0 | 37.6090 | 34.2400 | 42.3570 | H | 0 | 54.2380 | 44.4140 | 46.5270 | H | 0 |
| 32.0450 | 31.0690 | 32.3260 | H | 0 | 36.0310 | 36.9560 | 41.0500 | C | 0 | 54.2390 | 44.5160 | 43.8450 | C | 0 |
| 32.7900 | 29.6520 | 30.8340 | C | 0 | 36.1950 | 37.6730 | 40.0770 | O | 0 | 54.8960 | 45.2530 | 43.1290 | O | 0 |
| 31.6540 | 29.1070 | 30.3720 | C | 0 | 36.3310 | 37.4450 | 42.2820 | N | 0 | 54.3490 | 43.1280 | 43.8180 | N | 0 |
| 30.7030 | 29.6150 | 30.4270 | H | 0 | 36.1550 | 36.7910 | 43.0320 | H | 0 | 53.8060 | 42.6500 | 44.5220 | H | 0 |
| 31.7090 | 27.8830 | 29.8320 | C | 0 | 36.8260 | 38.8580 | 42.5810 | C | 0 | 55.1710 | 42.1750 | 43.0580 | C | 0 |
| 30.8300 | 27.4140 | 29.4150 | H | 0 | 36.4910 | 39.6370 | 41.8970 | H | 0 | 56.2060 | 42.5070 | 43.1380 | H | 0 |
| 32.9450 | 27.2170 | 29.6360 | C | 0 | 36.4750 | 39.1020 | 43.5840 | H | 0 | 54.9810 | 41.1950 | 43.4970 | H | 0 |

|         |         |         |   |   |         |         |         |   |   |         |         |         |   |   |
|---------|---------|---------|---|---|---------|---------|---------|---|---|---------|---------|---------|---|---|
| 54.8480 | 42.1960 | 41.5760 | C | 0 | 41.3590 | 34.0780 | 38.9470 | C | 0 | 46.5430 | 25.1610 | 34.3810 | H | 0 |
| 55.5640 | 41.5150 | 40.8210 | O | 0 | 42.0760 | 33.2810 | 38.3560 | O | 0 | 44.4530 | 25.9950 | 34.3200 | C | 0 |
| 53.9120 | 42.9970 | 41.1080 | N | 0 | 40.1240 | 33.6710 | 39.2480 | N | 0 | 44.6740 | 26.7550 | 35.0540 | H | 0 |
| 53.2850 | 43.4180 | 41.7790 | H | 0 | 39.5380 | 34.2580 | 39.8240 | H | 0 | 43.2620 | 26.0610 | 33.5950 | C | 0 |
| 53.5070 | 43.1050 | 39.6990 | C | 0 | 39.6110 | 32.3030 | 38.9100 | C | 0 | 41.7720 | 28.7630 | 36.9550 | C | 0 |
| 52.9500 | 44.0060 | 39.4400 | H | 0 | 40.4040 | 31.6660 | 38.5260 | H | 0 | 41.1010 | 29.8140 | 36.7640 | O | 0 |
| 54.3650 | 43.2970 | 39.0550 | H | 0 | 39.2380 | 31.8350 | 39.8210 | H | 0 | 42.4530 | 28.6850 | 38.0350 | N | 0 |
| 52.5550 | 42.0400 | 39.1660 | C | 0 | 38.4370 | 32.2920 | 37.8700 | C | 0 | 42.9320 | 27.8080 | 38.1800 | H | 0 |
| 52.5620 | 41.9240 | 37.9230 | O | 0 | 37.7110 | 33.2920 | 37.6690 | O | 0 | 43.0300 | 29.7780 | 38.7170 | C | 0 |
| 51.8700 | 41.2690 | 40.0130 | N | 0 | 38.2760 | 31.1400 | 37.2040 | N | 0 | 42.2370 | 30.5240 | 38.7840 | H | 0 |
| 51.8830 | 41.5190 | 40.9920 | H | 0 | 39.0010 | 30.4870 | 37.4670 | H | 0 | 43.3240 | 29.3270 | 40.1640 | C | 0 |
| 50.9620 | 40.1870 | 39.6480 | C | 0 | 37.3250 | 30.9500 | 36.1390 | C | 0 | 42.3890 | 28.9610 | 40.5880 | H | 0 |
| 51.0050 | 40.0760 | 38.5640 | H | 0 | 36.8370 | 31.9190 | 36.0340 | H | 0 | 44.0010 | 28.4790 | 40.2610 | H | 0 |
| 51.3830 | 38.9140 | 40.2500 | C | 0 | 38.1080 | 30.6900 | 34.8790 | C | 0 | 43.8090 | 30.4270 | 41.1270 | C | 0 |
| 51.3080 | 38.9700 | 41.3360 | H | 0 | 37.4200 | 30.5880 | 34.0400 | H | 0 | 43.2230 | 31.6470 | 41.1790 | C | 0 |
| 50.7170 | 38.0960 | 39.9750 | H | 0 | 39.0360 | 31.7900 | 34.4530 | C | 0 | 42.5020 | 31.9100 | 40.4190 | H | 0 |
| 52.7810 | 38.5060 | 39.8990 | C | 0 | 38.5480 | 32.7310 | 34.7080 | H | 0 | 43.5600 | 32.6530 | 42.0810 | C | 0 |
| 53.5090 | 39.3090 | 40.0060 | H | 0 | 39.9190 | 31.6970 | 35.0860 | H | 0 | 42.9820 | 33.5660 | 42.0850 | H | 0 |
| 53.2870 | 37.3110 | 40.6870 | C | 0 | 39.3300 | 31.6530 | 33.4130 | H | 0 | 44.5240 | 32.3590 | 43.1230 | C | 0 |
| 54.2180 | 36.9320 | 40.2650 | H | 0 | 38.8120 | 29.4920 | 35.0030 | O | 0 | 44.7810 | 33.1210 | 43.8450 | H | 0 |
| 53.5770 | 37.7790 | 41.6280 | H | 0 | 39.6460 | 29.6280 | 35.4580 | H | 0 | 45.1150 | 31.0550 | 43.1280 | C | 0 |
| 52.4220 | 36.6650 | 40.8380 | H | 0 | 36.2680 | 29.8740 | 36.3600 | C | 0 | 45.7390 | 30.7390 | 43.9510 | H | 0 |
| 52.7470 | 38.0020 | 38.4040 | C | 0 | 36.5480 | 28.8090 | 36.9270 | O | 0 | 44.7650 | 30.1210 | 42.1160 | C | 0 |
| 52.5470 | 38.7650 | 37.6520 | H | 0 | 35.1290 | 30.1640 | 35.7090 | N | 0 | 45.1900 | 29.1300 | 42.1830 | H | 0 |
| 53.7760 | 37.7530 | 38.1480 | H | 0 | 35.0870 | 30.9390 | 35.0630 | H | 0 | 44.2630 | 30.1740 | 37.9070 | C | 0 |
| 52.0850 | 37.1740 | 38.1520 | H | 0 | 34.1640 | 29.0410 | 35.6790 | C | 0 | 45.1640 | 29.3910 | 37.5910 | O | 0 |
| 49.5250 | 40.5310 | 40.1400 | C | 0 | 34.0250 | 28.6340 | 36.6800 | H | 0 | 44.2410 | 31.4970 | 37.5440 | N | 0 |
| 49.2610 | 41.1820 | 41.1460 | O | 0 | 32.8720 | 29.5370 | 35.0540 | C | 0 | 43.4970 | 32.0820 | 37.8970 | H | 0 |
| 48.5880 | 40.0430 | 39.3360 | N | 0 | 33.1100 | 30.2230 | 34.2410 | H | 0 | 45.0750 | 32.2030 | 36.5050 | C | 0 |
| 48.8830 | 39.5420 | 38.5100 | H | 0 | 32.3850 | 28.6310 | 34.6940 | H | 0 | 45.8590 | 31.5760 | 36.0820 | H | 0 |
| 47.1040 | 40.0040 | 39.5040 | C | 0 | 32.0050 | 30.3440 | 36.0450 | C | 0 | 44.2540 | 32.8140 | 35.3670 | C | 0 |
| 46.9700 | 40.1780 | 40.5720 | H | 0 | 32.5980 | 30.5180 | 36.9430 | H | 0 | 43.3930 | 33.2320 | 35.8890 | H | 0 |
| 46.3030 | 41.0220 | 38.6340 | C | 0 | 31.8170 | 31.3110 | 35.5780 | H | 0 | 44.8340 | 33.4710 | 34.7200 | H | 0 |
| 45.3330 | 41.1430 | 39.1160 | H | 0 | 30.3660 | 29.5730 | 36.4050 | S | 0 | 43.7810 | 31.7370 | 34.4010 | C | 0 |
| 46.9330 | 41.9090 | 38.6950 | H | 0 | 29.9300 | 30.6230 | 37.8270 | C | 0 | 44.7020 | 31.3010 | 34.0140 | H | 0 |
| 46.2340 | 40.7670 | 37.5770 | H | 0 | 30.6840 | 30.6570 | 38.6140 | H | 0 | 43.1000 | 31.0850 | 34.9470 | H | 0 |
| 46.6930 | 38.5070 | 39.3760 | C | 0 | 29.7300 | 31.5810 | 37.3480 | H | 0 | 42.9530 | 32.2890 | 33.2530 | C | 0 |
| 47.1250 | 37.7320 | 38.4980 | O | 0 | 28.9740 | 30.2520 | 38.1970 | H | 0 | 42.1270 | 32.8690 | 33.6670 | H | 0 |
| 45.7450 | 38.0750 | 40.2310 | N | 0 | 34.7590 | 27.9190 | 34.9090 | C | 0 | 43.6170 | 32.9090 | 32.6500 | H | 0 |
| 45.6030 | 38.6600 | 41.0420 | H | 0 | 34.2140 | 26.8360 | 35.0270 | O | 0 | 42.3230 | 31.1180 | 32.4010 | C | 0 |
| 45.2930 | 36.6770 | 40.4180 | C | 0 | 35.8010 | 28.1040 | 34.1160 | N | 0 | 43.0090 | 30.3530 | 33.0380 | H | 0 |
| 45.6640 | 36.0150 | 39.6360 | H | 0 | 36.1110 | 29.0620 | 34.0340 | H | 0 | 41.6320 | 30.5390 | 33.0130 | H | 0 |
| 45.9100 | 36.1710 | 41.7370 | C | 0 | 36.5510 | 27.0710 | 33.3950 | C | 0 | 41.7170 | 31.7600 | 31.2490 | N | 0 |
| 45.7970 | 36.9100 | 42.5310 | H | 0 | 35.9290 | 26.3820 | 32.8240 | H | 0 | 41.4470 | 31.0940 | 30.5400 | H | 0 |
| 45.3610 | 35.3000 | 42.0930 | H | 0 | 37.5120 | 27.7250 | 32.3610 | C | 0 | 40.8470 | 32.2110 | 31.4930 | H | 0 |
| 47.4560 | 35.9480 | 41.7130 | C | 0 | 37.1030 | 28.6460 | 31.9440 | H | 0 | 42.3210 | 32.4070 | 30.7610 | H | 0 |
| 48.3540 | 36.9560 | 42.1680 | C | 0 | 38.4440 | 27.9910 | 32.8590 | H | 0 | 45.7830 | 33.3520 | 37.2940 | C | 0 |
| 47.9410 | 37.9020 | 42.4880 | H | 0 | 37.8950 | 26.8150 | 31.1680 | C | 0 | 45.2500 | 33.9390 | 38.2880 | O | 0 |
| 49.7300 | 36.6860 | 42.3920 | C | 0 | 37.2940 | 25.6900 | 31.0330 | O | 0 | 46.9700 | 33.6790 | 36.8370 | N | 0 |
| 50.3270 | 37.4540 | 42.8620 | H | 0 | 38.8520 | 27.2050 | 30.4430 | O | 0 | 47.3740 | 33.1140 | 36.1040 | H | 0 |
| 50.2580 | 35.3920 | 42.3200 | C | 0 | 37.4390 | 26.2370 | 34.2740 | C | 0 | 47.8200 | 34.7640 | 37.3290 | C | 0 |
| 51.2880 | 35.1440 | 42.5290 | H | 0 | 38.1910 | 25.3960 | 33.8420 | O | 0 | 47.1980 | 35.3780 | 37.9810 | H | 0 |
| 49.4140 | 34.3890 | 41.9200 | C | 0 | 37.3550 | 26.3720 | 35.5770 | N | 0 | 48.7970 | 34.0860 | 38.3020 | C | 0 |
| 49.8330 | 33.4000 | 41.8010 | H | 0 | 36.7750 | 27.1370 | 35.8920 | H | 0 | 48.3650 | 33.2330 | 38.8250 | H | 0 |
| 48.0700 | 34.7050 | 41.6290 | C | 0 | 38.2390 | 25.6830 | 36.5660 | C | 0 | 49.6030 | 33.6270 | 37.7290 | H | 0 |
| 47.4030 | 33.9020 | 41.3540 | H | 0 | 37.7690 | 25.8340 | 37.5380 | H | 0 | 49.2350 | 34.7570 | 39.0410 | H | 0 |
| 43.7610 | 36.6110 | 40.3530 | C | 0 | 38.2970 | 24.6130 | 36.3680 | H | 0 | 48.5260 | 35.5550 | 36.2050 | C | 0 |
| 43.1110 | 37.4460 | 41.0020 | O | 0 | 39.6430 | 26.2270 | 36.7210 | C | 0 | 49.1620 | 34.9590 | 35.3560 | O | 0 |
| 43.1710 | 35.6540 | 39.6290 | N | 0 | 40.3370 | 25.7150 | 37.6030 | O | 0 | 48.5880 | 36.9080 | 36.3000 | N | 0 |
| 43.6910 | 35.0350 | 39.0230 | H | 0 | 40.1250 | 27.1880 | 35.9980 | N | 0 | 48.1710 | 37.2530 | 37.1530 | H | 0 |
| 41.7340 | 35.4990 | 39.5470 | C | 0 | 39.6220 | 27.5780 | 35.2130 | H | 0 | 48.8390 | 37.8560 | 35.2250 | C | 0 |
| 41.2350 | 35.6330 | 40.5070 | H | 0 | 41.5160 | 27.5540 | 36.0530 | C | 0 | 49.1830 | 37.3380 | 34.3300 | H | 0 |
| 41.0900 | 36.4180 | 38.5030 | C | 0 | 42.1370 | 26.7860 | 36.5160 | H | 0 | 47.5130 | 38.5760 | 34.7740 | C | 0 |
| 40.0050 | 36.3220 | 38.5460 | H | 0 | 41.9660 | 28.0330 | 34.6780 | C | 0 | 46.9870 | 39.0020 | 35.6280 | H | 0 |
| 41.2730 | 37.4880 | 38.5990 | H | 0 | 41.2760 | 28.7750 | 34.2760 | H | 0 | 47.7380 | 39.6600 | 33.7620 | C | 0 |
| 41.5130 | 36.2440 | 37.0480 | C | 0 | 42.8860 | 28.5990 | 34.8250 | H | 0 | 46.8780 | 40.2880 | 33.5310 | H | 0 |
| 42.8040 | 36.5970 | 36.5940 | C | 0 | 42.1610 | 26.9390 | 33.6850 | C | 0 | 48.4570 | 40.4230 | 34.0610 | H | 0 |
| 43.4440 | 37.3050 | 37.1000 | H | 0 | 41.2210 | 26.4750 | 32.7840 | C | 0 | 48.0790 | 39.2790 | 32.7990 | H | 0 |
| 43.2510 | 36.1800 | 35.3260 | C | 0 | 40.2080 | 26.8280 | 32.6600 | H | 0 | 46.5870 | 37.4710 | 34.1470 | C | 0 |
| 44.2430 | 36.4010 | 34.9610 | H | 0 | 41.8580 | 25.4970 | 31.9780 | N | 0 | 46.3880 | 36.5980 | 34.7680 | H | 0 |
| 42.3260 | 35.5950 | 34.3850 | C | 0 | 41.3000 | 24.8330 | 31.4590 | H | 0 | 45.6250 | 37.9170 | 33.8940 | H | 0 |
| 42.6990 | 35.3170 | 33.1580 | O | 0 | 43.1280 | 25.2120 | 32.4330 | C | 0 | 47.0840 | 37.0630 | 33.2670 | H | 0 |
| 41.9600 | 34.9840 | 32.6440 | H | 0 | 44.1720 | 24.3920 | 31.9790 | C | 0 | 49.9590 | 38.8780 | 35.5830 | C | 0 |
| 41.0290 | 35.2730 | 34.7860 | C | 0 | 44.2270 | 23.8630 | 31.0400 | H | 0 | 49.9450 | 39.4930 | 36.6480 | O | 0 |
| 40.2520 | 34.8470 | 34.1680 | H | 0 | 45.4000 | 24.4830 | 32.6650 | C | 0 | 50.8410 | 39.1450 | 34.6010 | N | 0 |
| 40.6660 | 35.5810 | 36.1240 | C | 0 | 46.2310 | 23.9070 | 32.2860 | H | 0 | 50.6390 | 38.6250 | 33.7590 | H | 0 |
| 39.7050 | 35.2390 | 36.4800 | H | 0 | 45.5950 | 25.2320 | 33.8680 | C | 0 | 51.8360 | 40.1720 | 34.7360 | C | 0 |

|         |         |         |   |   |         |         |         |   |   |         |         |         |   |   |
|---------|---------|---------|---|---|---------|---------|---------|---|---|---------|---------|---------|---|---|
| 52.3420 | 40.2120 | 35.7000 | H | 0 | 52.0520 | 37.0140 | 29.4680 | H | 0 | 47.5980 | 28.7730 | 35.5250 | C | 0 |
| 53.0090 | 39.8400 | 33.8490 | C | 0 | 52.1490 | 38.9190 | 28.4130 | C | 0 | 47.1150 | 29.3480 | 36.3140 | H | 0 |
| 53.5610 | 39.0740 | 34.3950 | H | 0 | 52.0050 | 39.9860 | 28.5840 | H | 0 | 46.8670 | 29.1890 | 34.2440 | C | 0 |
| 52.6910 | 39.3740 | 32.9160 | H | 0 | 53.2260 | 38.7730 | 28.3300 | H | 0 | 45.8010 | 29.0520 | 34.4240 | H | 0 |
| 53.9560 | 41.0030 | 33.7450 | C | 0 | 51.3800 | 38.6830 | 27.0710 | C | 0 | 47.0460 | 30.2350 | 33.9930 | H | 0 |
| 53.8820 | 42.0280 | 34.4910 | O | 0 | 51.5820 | 37.6890 | 26.6730 | H | 0 | 47.2190 | 28.3560 | 32.9630 | C | 0 |
| 54.7360 | 40.9360 | 32.7910 | O | 0 | 50.3050 | 38.8000 | 27.2120 | H | 0 | 48.2220 | 28.6040 | 32.6160 | H | 0 |
| 51.1540 | 41.5370 | 34.4700 | C | 0 | 51.7230 | 39.7760 | 26.0990 | C | 0 | 47.2760 | 27.2870 | 33.1690 | H | 0 |
| 50.6950 | 41.7880 | 33.3700 | O | 0 | 51.0950 | 40.6600 | 26.2120 | H | 0 | 46.2500 | 28.6520 | 31.8200 | C | 0 |
| 50.9620 | 42.4580 | 35.4970 | N | 0 | 52.7640 | 40.0820 | 26.2050 | H | 0 | 45.5260 | 29.5870 | 31.7840 | O | 0 |
| 51.5700 | 42.3520 | 36.2960 | H | 0 | 51.4610 | 39.3110 | 24.7100 | N | 0 | 46.0750 | 27.7800 | 30.8250 | N | 0 |
| 50.1070 | 43.6500 | 35.3530 | C | 0 | 50.5880 | 38.8050 | 24.6650 | H | 0 | 45.2360 | 27.9350 | 30.2850 | H | 0 |
| 49.1090 | 43.3360 | 35.0450 | H | 0 | 51.4630 | 40.0440 | 24.0150 | H | 0 | 46.5130 | 26.8730 | 30.9080 | H | 0 |
| 49.8710 | 44.2460 | 36.7450 | C | 0 | 52.0980 | 38.5380 | 24.5750 | H | 0 | 47.5160 | 27.2950 | 35.9290 | C | 0 |
| 49.1370 | 45.0130 | 36.4970 | H | 0 | 49.9280 | 37.2220 | 31.1820 | C | 0 | 48.3680 | 26.4780 | 35.5090 | O | 0 |
| 49.0390 | 43.2510 | 37.5860 | C | 0 | 50.3960 | 37.4770 | 32.2520 | O | 0 | 46.5860 | 26.9470 | 36.8600 | N | 0 |
| 48.5950 | 43.7430 | 38.4520 | H | 0 | 49.1810 | 36.1360 | 30.9560 | N | 0 | 46.1220 | 27.6670 | 37.3940 | H | 0 |
| 48.2200 | 42.8250 | 37.0060 | H | 0 | 48.8370 | 35.8900 | 30.0380 | H | 0 | 46.3610 | 25.5270 | 37.2770 | C | 0 |
| 49.6120 | 42.4020 | 37.9600 | H | 0 | 49.0520 | 35.0000 | 31.9610 | C | 0 | 46.8430 | 24.8850 | 36.5400 | H | 0 |
| 51.1210 | 44.9560 | 37.3280 | C | 0 | 48.8760 | 35.5940 | 32.8570 | H | 0 | 47.0720 | 25.2150 | 38.5850 | C | 0 |
| 51.9340 | 44.2430 | 37.4640 | H | 0 | 47.7970 | 34.0900 | 31.6620 | C | 0 | 48.0270 | 25.7380 | 38.5250 | H | 0 |
| 51.4500 | 45.7270 | 36.6330 | H | 0 | 47.8530 | 33.7910 | 30.6160 | H | 0 | 46.6080 | 25.7490 | 39.4140 | H | 0 |
| 50.8950 | 45.7070 | 38.6290 | C | 0 | 47.8000 | 32.9730 | 32.7120 | C | 0 | 47.3480 | 23.7160 | 38.9530 | C | 0 |
| 50.1140 | 46.4660 | 38.6690 | H | 0 | 46.8300 | 32.4760 | 32.6900 | H | 0 | 46.3780 | 23.2390 | 39.0960 | H | 0 |
| 50.6370 | 44.9150 | 39.3320 | H | 0 | 48.5180 | 32.2020 | 32.4310 | H | 0 | 47.8970 | 23.1860 | 38.1750 | H | 0 |
| 51.8250 | 46.2000 | 38.9140 | H | 0 | 48.0000 | 33.3620 | 33.7110 | H | 0 | 48.2710 | 23.4920 | 40.1090 | C | 0 |
| 50.5920 | 44.6790 | 34.3660 | C | 0 | 46.4770 | 34.7890 | 31.9600 | C | 0 | 49.2470 | 24.1130 | 40.4020 | O | 0 |
| 49.7420 | 45.3170 | 33.7720 | O | 0 | 46.2450 | 34.8610 | 33.0230 | H | 0 | 48.0600 | 22.3970 | 40.8350 | N | 0 |
| 51.9230 | 44.8120 | 34.1430 | N | 0 | 46.4220 | 35.8090 | 31.5780 | H | 0 | 48.6780 | 22.3250 | 41.6300 | H | 0 |
| 52.5600 | 44.2380 | 34.6760 | H | 0 | 45.6740 | 34.2820 | 31.4250 | H | 0 | 47.1220 | 22.0240 | 40.8180 | H | 0 |
| 52.4340 | 45.8070 | 33.1780 | C | 0 | 50.4100 | 34.2340 | 32.0820 | C | 0 | 44.8600 | 25.3290 | 37.3590 | C | 0 |
| 51.6980 | 46.6100 | 33.2090 | H | 0 | 50.5490 | 33.3660 | 31.2690 | O | 0 | 44.0770 | 26.2230 | 37.5650 | O | 0 |
| 53.8010 | 46.3690 | 33.6990 | C | 0 | 51.2120 | 34.5110 | 33.1000 | N | 0 | 44.4270 | 24.0980 | 37.0490 | N | 0 |
| 54.4050 | 45.4640 | 33.7590 | H | 0 | 50.9100 | 35.1980 | 33.7760 | H | 0 | 45.1240 | 23.3670 | 37.0500 | H | 0 |
| 54.2320 | 47.0000 | 32.9210 | H | 0 | 52.4250 | 33.7080 | 33.4070 | C | 0 | 43.0100 | 23.6340 | 36.9330 | C | 0 |
| 53.7730 | 47.1130 | 35.0490 | C | 0 | 53.0250 | 33.6570 | 32.4990 | H | 0 | 42.3770 | 24.5130 | 36.8080 | H | 0 |
| 53.0220 | 47.9020 | 35.0030 | H | 0 | 53.2850 | 34.4800 | 34.4350 | C | 0 | 42.9630 | 22.8200 | 35.6800 | C | 0 |
| 53.5460 | 46.4690 | 35.8990 | H | 0 | 52.8230 | 34.2080 | 35.3840 | H | 0 | 43.4240 | 23.4120 | 34.8890 | H | 0 |
| 55.0810 | 47.8620 | 35.3610 | C | 0 | 54.3110 | 34.1120 | 34.4260 | H | 0 | 43.5600 | 21.9400 | 35.9200 | H | 0 |
| 55.2250 | 48.7170 | 34.7010 | H | 0 | 53.3780 | 36.0180 | 34.3880 | C | 0 | 41.5490 | 22.3380 | 35.2810 | C | 0 |
| 54.7400 | 48.1790 | 36.3470 | H | 0 | 52.3980 | 36.4840 | 34.4930 | H | 0 | 41.7300 | 21.4030 | 34.7510 | H | 0 |
| 56.3240 | 46.9810 | 35.3330 | C | 0 | 54.4240 | 36.5100 | 35.3830 | C | 0 | 40.8900 | 22.2160 | 36.1400 | H | 0 |
| 56.5670 | 46.5510 | 34.3610 | H | 0 | 54.0840 | 37.4740 | 35.7610 | H | 0 | 40.7400 | 23.2690 | 34.2920 | C | 0 |
| 57.1230 | 47.6780 | 35.5840 | H | 0 | 54.6070 | 35.8110 | 36.1990 | H | 0 | 40.6390 | 24.2580 | 34.7390 | H | 0 |
| 56.4160 | 45.8750 | 36.3030 | N | 0 | 55.4070 | 36.7920 | 35.0060 | H | 0 | 41.2970 | 23.2340 | 33.3560 | H | 0 |
| 56.4330 | 46.3200 | 37.2090 | H | 0 | 53.6800 | 36.4670 | 32.9080 | C | 0 | 39.4720 | 22.5200 | 34.0530 | C | 0 |
| 55.5770 | 45.3200 | 36.3940 | H | 0 | 52.8600 | 36.2130 | 32.2360 | H | 0 | 39.6800 | 21.4570 | 33.9360 | H | 0 |
| 57.1930 | 45.2450 | 36.1610 | H | 0 | 53.9720 | 37.5160 | 32.8560 | H | 0 | 39.0010 | 22.6500 | 35.0270 | H | 0 |
| 52.4810 | 45.2460 | 31.7340 | C | 0 | 54.5340 | 35.8630 | 32.6000 | H | 0 | 38.7370 | 23.0300 | 32.8860 | N | 0 |
| 52.9400 | 45.9460 | 30.8500 | O | 0 | 52.1700 | 32.3260 | 33.9380 | C | 0 | 38.5250 | 24.0070 | 33.0240 | H | 0 |
| 52.0090 | 44.0010 | 31.4870 | N | 0 | 52.7870 | 31.3150 | 33.5760 | O | 0 | 39.3300 | 22.9170 | 32.0760 | H | 0 |
| 51.6950 | 43.4650 | 32.2830 | H | 0 | 51.1690 | 32.1730 | 34.8200 | N | 0 | 37.8170 | 22.6470 | 32.7230 | H | 0 |
| 51.9020 | 43.3810 | 30.1730 | C | 0 | 50.5290 | 32.9370 | 34.9860 | H | 0 | 42.5810 | 22.9310 | 38.2640 | C | 0 |
| 51.9830 | 44.2010 | 29.4600 | H | 0 | 50.7530 | 30.9180 | 35.5040 | C | 0 | 43.1520 | 21.9530 | 38.7590 | O | 0 |
| 52.9850 | 42.2990 | 29.8830 | C | 0 | 51.1870 | 30.0720 | 34.9710 | H | 0 | 41.6090 | 23.5050 | 38.9370 | N | 0 |
| 52.7780 | 41.8140 | 28.9290 | H | 0 | 51.3730 | 30.9720 | 36.9620 | C | 0 | 41.1760 | 24.2580 | 38.4210 | H | 0 |
| 54.3700 | 42.9230 | 29.6530 | C | 0 | 52.4450 | 31.1610 | 36.9060 | H | 0 | 40.8960 | 23.0300 | 40.1560 | C | 0 |
| 54.5460 | 43.7610 | 30.3280 | H | 0 | 50.8960 | 31.8690 | 37.3570 | H | 0 | 41.5050 | 22.3600 | 40.7630 | H | 0 |
| 55.0770 | 42.1360 | 29.9150 | H | 0 | 51.1010 | 29.8290 | 37.8750 | C | 0 | 40.4340 | 24.2460 | 40.9470 | C | 0 |
| 54.5810 | 43.1160 | 28.6010 | H | 0 | 51.8060 | 28.7490 | 37.9460 | C | 0 | 39.8930 | 24.9800 | 40.3500 | H | 0 |
| 52.7650 | 41.2920 | 30.8810 | O | 0 | 52.7550 | 28.6450 | 37.4400 | H | 0 | 39.7000 | 23.9220 | 41.6840 | H | 0 |
| 53.5120 | 41.3400 | 31.4830 | H | 0 | 51.2240 | 27.7940 | 38.8020 | N | 0 | 41.5440 | 24.9630 | 41.6910 | C | 0 |
| 50.6170 | 42.6480 | 29.8810 | C | 0 | 51.5700 | 26.8670 | 39.0050 | H | 0 | 42.0800 | 24.2270 | 42.2900 | H | 0 |
| 50.3930 | 42.4140 | 28.7420 | O | 0 | 50.0410 | 28.2870 | 39.3010 | C | 0 | 42.5380 | 25.7190 | 40.7760 | C | 0 |
| 49.7610 | 42.3920 | 30.8410 | N | 0 | 48.9980 | 27.7540 | 39.9830 | C | 0 | 43.2230 | 24.9560 | 40.4080 | H | 0 |
| 50.0430 | 42.5640 | 31.7950 | H | 0 | 49.1500 | 26.7770 | 40.4170 | H | 0 | 41.9780 | 26.0500 | 39.9010 | H | 0 |
| 48.5200 | 41.6590 | 30.5880 | C | 0 | 47.8610 | 28.5590 | 40.3180 | C | 0 | 42.9020 | 26.5980 | 41.3070 | H | 0 |
| 47.8940 | 41.6040 | 31.4790 | H | 0 | 47.2180 | 27.9950 | 40.9780 | H | 0 | 40.8270 | 25.9430 | 42.6410 | C | 0 |
| 48.0480 | 42.1650 | 29.7460 | H | 0 | 47.7200 | 29.8150 | 39.7250 | C | 0 | 41.5760 | 26.6980 | 42.8810 | H | 0 |
| 48.6650 | 40.1780 | 30.1970 | C | 0 | 46.7870 | 30.3490 | 39.8300 | H | 0 | 40.0800 | 26.4910 | 42.0680 | H | 0 |
| 47.7150 | 39.6470 | 29.5990 | O | 0 | 48.7590 | 30.3300 | 38.9220 | C | 0 | 40.2560 | 25.4110 | 43.4020 | H | 0 |
| 49.8900 | 39.5700 | 30.3950 | N | 0 | 48.7310 | 31.3040 | 38.4560 | H | 0 | 39.7870 | 22.0870 | 39.6970 | C | 0 |
| 50.6860 | 40.0050 | 30.8380 | H | 0 | 49.8990 | 29.5250 | 38.6610 | C | 0 | 39.3330 | 22.2010 | 38.5250 | O | 0 |
| 50.1980 | 38.1500 | 30.0050 | C | 0 | 49.2640 | 30.6340 | 35.4520 | C | 0 | 39.2250 | 21.2880 | 40.6310 | N | 0 |
| 49.6330 | 37.8520 | 29.1220 | H | 0 | 48.3260 | 31.4510 | 35.5620 | O | 0 | 39.7000 | 21.0880 | 41.5000 | H | 0 |
| 51.7130 | 38.0340 | 29.6490 | C | 0 | 48.9700 | 29.3050 | 35.3610 | N | 0 | 38.3270 | 20.2760 | 40.2100 | C | 0 |
| 52.2890 | 38.3380 | 30.5230 | H | 0 | 49.7080 | 28.6160 | 35.3580 | H | 0 | 38.5680 | 19.8330 | 39.2440 | H | 0 |

|         |         |         |   |   |         |         |         |   |   |         |         |         |   |   |
|---------|---------|---------|---|---|---------|---------|---------|---|---|---------|---------|---------|---|---|
| 38.3580 | 19.4710 | 40.9440 | H | 0 | 34.9290 | 38.1220 | 47.8360 | H | 0 | 53.6850 | 37.4530 | 54.8230 | C | 0 |
| 36.8340 | 20.7500 | 40.0900 | C | 0 | 38.7420 | 35.3480 | 46.3660 | C | 0 | 52.8560 | 38.0320 | 54.4150 | H | 0 |
| 36.0840 | 20.0000 | 39.4550 | O | 0 | 38.8570 | 35.1560 | 47.5890 | O | 0 | 54.6030 | 38.4990 | 55.6120 | C | 0 |
| 36.5040 | 21.9410 | 40.6380 | N | 0 | 39.9020 | 35.3420 | 45.6210 | N | 0 | 55.1280 | 39.0860 | 54.8580 | H | 0 |
| 37.2280 | 22.4060 | 41.1680 | H | 0 | 39.9680 | 35.1650 | 44.1490 | C | 0 | 54.1350 | 39.2380 | 56.2630 | H | 0 |
| 35.2020 | 22.5140 | 40.4720 | C | 0 | 39.2470 | 35.7350 | 43.5630 | H | 0 | 55.4340 | 37.9730 | 56.0810 | H | 0 |
| 34.6800 | 22.0430 | 39.6390 | H | 0 | 39.8260 | 34.1030 | 43.9510 | H | 0 | 54.3570 | 36.7700 | 53.6950 | C | 0 |
| 34.3260 | 22.4250 | 41.6730 | C | 0 | 41.3980 | 35.4630 | 43.7650 | C | 0 | 54.9470 | 37.4180 | 53.0460 | H | 0 |
| 34.1970 | 21.3640 | 41.8860 | H | 0 | 41.6580 | 36.5190 | 43.8470 | H | 0 | 54.9550 | 35.9270 | 54.0400 | H | 0 |
| 34.7540 | 22.9540 | 42.5250 | H | 0 | 41.5560 | 35.0650 | 42.7620 | H | 0 | 53.6450 | 36.2590 | 53.0470 | H | 0 |
| 33.0670 | 22.8990 | 41.3970 | O | 0 | 42.0720 | 34.6470 | 44.9090 | C | 0 | 51.9050 | 34.2890 | 56.3590 | C | 0 |
| 32.5560 | 22.2910 | 40.8580 | H | 0 | 43.1210 | 34.9110 | 45.0460 | H | 0 | 50.8820 | 34.3950 | 57.0510 | O | 0 |
| 35.2420 | 23.9870 | 40.0740 | C | 0 | 41.9460 | 33.5700 | 44.8010 | H | 0 | 52.7280 | 33.2170 | 56.5180 | N | 0 |
| 35.9960 | 24.6940 | 40.6800 | O | 0 | 41.2430 | 35.0340 | 46.1350 | C | 0 | 53.3800 | 32.9950 | 55.7790 | H | 0 |
| 34.3770 | 24.4540 | 39.1240 | N | 0 | 41.1870 | 34.1240 | 46.7330 | H | 0 | 52.5990 | 32.1610 | 57.4840 | C | 0 |
| 33.8400 | 23.7390 | 38.6530 | H | 0 | 41.9740 | 35.9800 | 47.1150 | C | 0 | 51.6090 | 32.0790 | 57.9320 | H | 0 |
| 34.3740 | 25.8670 | 38.5810 | C | 0 | 41.7860 | 37.1910 | 47.1710 | O | 0 | 52.7280 | 31.2290 | 56.9320 | H | 0 |
| 35.1130 | 25.9710 | 37.7860 | H | 0 | 42.9060 | 35.4490 | 47.9440 | N | 0 | 53.6070 | 32.3670 | 58.5670 | C | 0 |
| 33.4220 | 26.1910 | 38.1590 | H | 0 | 43.0290 | 34.4510 | 47.8430 | H | 0 | 54.4820 | 33.2400 | 58.5030 | O | 0 |
| 34.5630 | 26.8820 | 39.7450 | C | 0 | 43.6200 | 36.1900 | 49.0160 | C | 0 | 53.5830 | 31.6490 | 59.7410 | N | 0 |
| 33.8510 | 26.8980 | 40.7790 | O | 0 | 43.4230 | 37.2600 | 48.9510 | H | 0 | 52.5890 | 30.6120 | 60.1300 | C | 0 |
| 35.5180 | 27.8410 | 39.6500 | N | 0 | 43.2050 | 35.7730 | 50.4540 | C | 0 | 52.3770 | 29.8400 | 59.3910 | H | 0 |
| 35.9720 | 28.0050 | 38.7630 | H | 0 | 43.5020 | 36.6080 | 51.0890 | H | 0 | 51.7140 | 31.1850 | 60.4340 | H | 0 |
| 35.7850 | 28.9530 | 40.6230 | C | 0 | 41.6760 | 35.8320 | 50.4130 | C | 0 | 53.1490 | 29.8440 | 61.3100 | C | 0 |
| 35.6620 | 28.5200 | 41.6150 | H | 0 | 41.3700 | 36.6670 | 49.7840 | H | 0 | 53.5560 | 28.9310 | 60.8760 | H | 0 |
| 37.2600 | 29.4760 | 40.6130 | C | 0 | 41.2260 | 34.9340 | 49.9900 | H | 0 | 52.3770 | 29.6530 | 62.0560 | H | 0 |
| 37.3500 | 29.9860 | 39.6540 | H | 0 | 41.2050 | 35.9550 | 51.3880 | H | 0 | 54.2810 | 30.6980 | 61.8550 | C | 0 |
| 37.5680 | 30.5020 | 41.7660 | C | 0 | 43.6540 | 34.4860 | 51.1420 | C | 0 | 55.1580 | 30.0780 | 62.0430 | H | 0 |
| 37.5830 | 30.0190 | 42.7430 | H | 0 | 42.9040 | 33.7060 | 51.0080 | H | 0 | 53.9720 | 31.1330 | 62.8060 | H | 0 |
| 38.5090 | 30.9950 | 41.5220 | H | 0 | 44.6790 | 34.2050 | 50.9010 | H | 0 | 54.6500 | 31.7420 | 60.8350 | C | 0 |
| 36.7660 | 31.2260 | 41.9120 | H | 0 | 43.5900 | 34.7270 | 52.6980 | C | 0 | 54.6050 | 32.7060 | 61.3420 | H | 0 |
| 38.1920 | 28.2890 | 40.6570 | C | 0 | 42.5530 | 34.7820 | 53.0280 | H | 0 | 56.0690 | 31.4620 | 60.3020 | C | 0 |
| 38.2310 | 27.9920 | 41.7050 | H | 0 | 44.0410 | 33.9290 | 53.2880 | H | 0 | 57.0400 | 32.0470 | 60.8370 | O | 0 |
| 37.8210 | 27.4820 | 40.0250 | H | 0 | 44.1360 | 35.6330 | 52.9610 | H | 0 | 56.2620 | 30.7970 | 59.1500 | N | 0 |
| 39.6640 | 28.5140 | 40.2940 | C | 0 | 45.0920 | 35.8670 | 48.8770 | C | 0 | 55.5050 | 30.3820 | 58.6270 | H | 0 |
| 40.1160 | 29.0380 | 41.1360 | H | 0 | 45.4440 | 34.8020 | 48.3530 | O | 0 | 57.5420 | 30.7350 | 58.4660 | C | 0 |
| 40.3660 | 27.6840 | 40.2280 | H | 0 | 45.9470 | 36.6140 | 49.4920 | N | 0 | 58.2870 | 30.4300 | 59.2010 | H | 0 |
| 39.8030 | 29.0960 | 39.3830 | H | 0 | 45.6000 | 37.5170 | 49.7830 | H | 0 | 57.5530 | 29.5850 | 57.3600 | C | 0 |
| 34.7560 | 30.0340 | 40.5150 | C | 0 | 47.3250 | 36.2570 | 49.8280 | C | 0 | 56.7850 | 29.6990 | 56.5950 | H | 0 |
| 34.7960 | 31.0620 | 39.8030 | O | 0 | 47.3190 | 35.1700 | 49.9060 | H | 0 | 58.4410 | 29.6120 | 56.7280 | H | 0 |
| 33.7020 | 29.8240 | 41.3440 | N | 0 | 48.3470 | 36.6350 | 48.6560 | C | 0 | 57.5120 | 28.1650 | 57.8730 | C | 0 |
| 33.5000 | 28.8670 | 41.5940 | H | 0 | 48.0020 | 36.2190 | 47.7090 | H | 0 | 58.1770 | 27.8090 | 58.8920 | O | 0 |
| 33.1740 | 30.8570 | 42.2750 | C | 0 | 48.3250 | 38.1680 | 48.4440 | C | 0 | 56.8420 | 27.3550 | 57.2300 | O | 0 |
| 33.1930 | 31.8590 | 41.8470 | H | 0 | 48.8750 | 38.6880 | 49.2280 | H | 0 | 57.9310 | 32.0180 | 57.6750 | C | 0 |
| 31.7360 | 30.4530 | 42.7020 | C | 0 | 48.7540 | 38.3650 | 47.4610 | H | 0 | 59.1090 | 32.1570 | 57.3330 | O | 0 |
| 31.3710 | 31.3410 | 43.2180 | H | 0 | 47.3610 | 38.6740 | 48.4140 | H | 0 | 57.0640 | 32.9970 | 57.6340 | N | 0 |
| 30.8580 | 30.1790 | 41.4700 | C | 0 | 49.7160 | 36.3050 | 48.9970 | O | 0 | 56.2630 | 32.7300 | 58.1880 | H | 0 |
| 29.8980 | 29.8760 | 41.8890 | H | 0 | 49.6890 | 35.3800 | 49.2530 | H | 0 | 57.0040 | 34.1260 | 56.7230 | C | 0 |
| 30.7160 | 31.1020 | 40.9070 | H | 0 | 47.8710 | 36.8050 | 51.1930 | C | 0 | 56.0310 | 34.5930 | 56.8750 | H | 0 |
| 31.1840 | 29.3320 | 40.8660 | H | 0 | 47.3190 | 37.8470 | 51.6210 | O | 0 | 58.1270 | 35.1910 | 56.9420 | C | 0 |
| 31.6460 | 29.2260 | 43.6800 | C | 0 | 48.8470 | 36.1440 | 51.7910 | N | 0 | 59.1210 | 34.8060 | 57.1700 | H | 0 |
| 32.1380 | 28.3770 | 43.2060 | H | 0 | 49.3880 | 35.4290 | 51.3260 | H | 0 | 58.3170 | 35.8370 | 56.0850 | H | 0 |
| 32.3180 | 29.4970 | 44.4940 | H | 0 | 49.1360 | 36.1880 | 53.2390 | C | 0 | 57.7510 | 36.1940 | 58.0310 | C | 0 |
| 30.2630 | 28.9160 | 44.2550 | C | 0 | 49.0940 | 37.2020 | 53.6360 | H | 0 | 58.5210 | 36.9650 | 58.0000 | H | 0 |
| 29.7230 | 29.8310 | 44.5000 | H | 0 | 48.0240 | 35.4870 | 53.9770 | C | 0 | 56.7690 | 36.6600 | 57.9540 | H | 0 |
| 29.6770 | 28.3920 | 43.5000 | H | 0 | 48.1230 | 35.8650 | 54.9950 | H | 0 | 57.8020 | 35.6340 | 59.4810 | C | 0 |
| 30.4350 | 28.3550 | 45.1740 | H | 0 | 47.1120 | 35.9980 | 53.6700 | H | 0 | 56.8760 | 35.1230 | 59.7450 | H | 0 |
| 34.1280 | 30.9810 | 43.4880 | C | 0 | 47.8130 | 33.9610 | 53.9460 | C | 0 | 58.5670 | 34.8990 | 59.7300 | H | 0 |
| 34.9180 | 30.0700 | 43.8060 | O | 0 | 47.0860 | 33.4010 | 52.8700 | C | 0 | 57.9730 | 36.6760 | 60.5590 | C | 0 |
| 34.0810 | 32.1400 | 44.1500 | N | 0 | 46.6190 | 34.0630 | 52.1560 | H | 0 | 58.8910 | 37.2600 | 60.4900 | H | 0 |
| 33.3100 | 32.7240 | 43.8580 | H | 0 | 46.8270 | 32.0380 | 52.8460 | C | 0 | 57.1420 | 37.3720 | 60.4450 | H | 0 |
| 34.8680 | 32.6360 | 45.3140 | C | 0 | 46.3640 | 31.5610 | 51.9950 | H | 0 | 57.8340 | 36.1470 | 61.9420 | N | 0 |
| 34.2460 | 33.1760 | 46.0280 | H | 0 | 47.2430 | 31.1920 | 53.9280 | C | 0 | 57.5740 | 36.8340 | 62.6360 | H | 0 |
| 35.3700 | 31.8530 | 45.8830 | H | 0 | 46.9020 | 30.1840 | 54.1100 | H | 0 | 57.1140 | 35.4390 | 61.9840 | H | 0 |
| 35.9390 | 33.6650 | 44.9010 | C | 0 | 48.1190 | 31.7620 | 54.9260 | C | 0 | 58.7050 | 35.7650 | 62.2820 | H | 0 |
| 36.2840 | 33.7390 | 43.7170 | O | 0 | 48.5010 | 31.2210 | 55.7800 | H | 0 | 56.8590 | 33.7510 | 55.2370 | C | 0 |
| 36.4170 | 34.4150 | 45.8690 | N | 0 | 48.4110 | 33.1800 | 54.9440 | C | 0 | 57.1290 | 34.6090 | 54.3840 | O | 0 |
| 35.9340 | 34.1260 | 46.7070 | H | 0 | 48.8910 | 33.5980 | 55.8160 | H | 0 | 56.4780 | 32.4930 | 54.9140 | N | 0 |
| 37.3270 | 35.5630 | 45.8200 | C | 0 | 50.5220 | 35.6120 | 53.5490 | C | 0 | 55.8600 | 32.0210 | 55.5570 | H | 0 |
| 37.5210 | 35.8150 | 44.7770 | H | 0 | 51.2330 | 34.9330 | 52.8030 | O | 0 | 56.3360 | 32.0120 | 53.5300 | C | 0 |
| 36.6040 | 36.7300 | 46.6160 | C | 0 | 51.0170 | 35.9510 | 54.7170 | N | 0 | 57.1660 | 32.4850 | 53.0070 | H | 0 |
| 36.4530 | 36.3310 | 47.6190 | H | 0 | 50.5120 | 36.5760 | 55.3300 | H | 0 | 56.3430 | 30.5390 | 53.5510 | C | 0 |
| 37.2280 | 37.6100 | 46.7680 | H | 0 | 52.1850 | 35.3630 | 55.2980 | C | 0 | 57.3130 | 30.3680 | 54.0160 | H | 0 |
| 35.2570 | 37.1550 | 46.1250 | C | 0 | 52.7970 | 34.8530 | 54.5540 | H | 0 | 55.5900 | 30.1820 | 54.2540 | H | 0 |
| 34.9270 | 36.9600 | 44.9650 | O | 0 | 53.0650 | 36.4860 | 55.8720 | C | 0 | 56.3250 | 30.0460 | 52.1170 | C | 0 |
| 34.5590 | 37.8410 | 46.9390 | N | 0 | 52.4140 | 37.0380 | 56.5500 | H | 0 | 55.3930 | 30.2720 | 51.6000 | H | 0 |
| 33.5880 | 38.0670 | 46.7760 | H | 0 | 53.8650 | 36.0240 | 56.4490 | H | 0 | 57.1820 | 30.5860 | 51.7160 | H | 0 |

|         |         |         |   |   |         |         |         |   |   |         |         |         |   |   |
|---------|---------|---------|---|---|---------|---------|---------|---|---|---------|---------|---------|---|---|
| 56.6190 | 28.5280 | 52.0190 | C | 0 | 42.4620 | 29.3160 | 47.4020 | H | 0 | 25.1850 | 28.9740 | 41.3190 | N | 0 |
| 57.6070 | 28.2880 | 52.4110 | H | 0 | 40.7370 | 30.3610 | 46.7570 | C | 0 | 24.7500 | 28.6520 | 42.1710 | H | 0 |
| 55.9460 | 27.9140 | 52.6170 | H | 0 | 40.2240 | 31.1910 | 47.2430 | H | 0 | 24.6680 | 30.2450 | 40.7670 | C | 0 |
| 56.6010 | 27.8470 | 50.5970 | C | 0 | 41.0790 | 30.5710 | 45.2500 | C | 0 | 23.9110 | 30.6610 | 41.4320 | H | 0 |
| 57.1570 | 26.9090 | 50.6050 | H | 0 | 41.8450 | 31.3360 | 45.1230 | H | 0 | 25.4640 | 30.9890 | 40.7370 | H | 0 |
| 55.5880 | 27.5600 | 50.3170 | H | 0 | 41.4580 | 29.2330 | 44.5530 | C | 0 | 23.9290 | 30.1650 | 39.3930 | C | 0 |
| 57.2030 | 28.6500 | 49.5040 | N | 0 | 42.2350 | 28.7040 | 45.1050 | H | 0 | 23.8350 | 29.0770 | 38.7510 | O | 0 |
| 58.1220 | 28.9810 | 49.7600 | H | 0 | 40.6350 | 28.5300 | 44.4220 | H | 0 | 23.4240 | 31.2780 | 38.9740 | N | 0 |
| 57.3360 | 28.1820 | 48.6190 | H | 0 | 41.8670 | 29.4640 | 43.5690 | H | 0 | 23.6750 | 32.1100 | 39.4880 | H | 0 |
| 56.6550 | 29.4880 | 49.3730 | H | 0 | 39.8430 | 31.1380 | 44.6340 | C | 0 | 22.5530 | 31.4210 | 37.6810 | C | 0 |
| 54.9800 | 32.5860 | 52.9880 | C | 0 | 39.0670 | 30.4420 | 44.3150 | H | 0 | 21.6890 | 30.7590 | 37.7350 | H | 0 |
| 53.9600 | 32.4640 | 53.6790 | O | 0 | 39.5590 | 32.0160 | 45.2140 | H | 0 | 22.0740 | 32.8720 | 37.7320 | C | 0 |
| 55.0020 | 33.2930 | 51.8660 | N | 0 | 40.1620 | 31.4910 | 43.6540 | H | 0 | 21.6800 | 33.1930 | 38.6960 | H | 0 |
| 55.9010 | 33.5050 | 51.4570 | H | 0 | 39.8840 | 29.1480 | 47.0900 | C | 0 | 22.8190 | 33.5810 | 37.3710 | H | 0 |
| 53.7910 | 33.8530 | 51.2290 | C | 0 | 40.4250 | 28.1040 | 47.4430 | O | 0 | 20.9190 | 33.2470 | 36.8890 | C | 0 |
| 53.2520 | 34.3880 | 52.0110 | H | 0 | 38.5890 | 29.2780 | 46.8990 | N | 0 | 20.1270 | 32.4060 | 36.1290 | C | 0 |
| 54.1430 | 34.8320 | 50.0930 | C | 0 | 38.1740 | 30.1500 | 46.6040 | H | 0 | 20.3100 | 31.3540 | 35.9700 | H | 0 |
| 54.6030 | 35.7240 | 50.5170 | H | 0 | 37.5910 | 28.1740 | 46.8430 | C | 0 | 19.2340 | 33.1390 | 35.2740 | N | 0 |
| 54.9440 | 34.5270 | 49.4190 | H | 0 | 37.9370 | 27.3550 | 47.4740 | H | 0 | 18.8120 | 32.7810 | 34.4280 | H | 0 |
| 52.8590 | 35.3810 | 49.4100 | C | 0 | 36.1970 | 28.7150 | 47.3270 | C | 0 | 19.2590 | 34.4380 | 35.6630 | C | 0 |
| 52.1620 | 34.6990 | 48.9230 | H | 0 | 35.8540 | 29.4720 | 46.6210 | H | 0 | 18.4680 | 35.6000 | 35.2940 | C | 0 |
| 52.1970 | 35.7380 | 50.1990 | H | 0 | 35.4030 | 27.9840 | 47.1730 | H | 0 | 17.5900 | 35.6270 | 34.6660 | H | 0 |
| 53.1610 | 36.5900 | 48.4340 | C | 0 | 36.1700 | 29.1850 | 48.7410 | C | 0 | 18.8040 | 36.8540 | 35.8380 | C | 0 |
| 54.3080 | 37.0450 | 48.1960 | O | 0 | 36.7590 | 28.5520 | 49.8140 | C | 0 | 18.1120 | 37.6430 | 35.5810 | H | 0 |
| 52.1620 | 37.3190 | 47.8990 | N | 0 | 37.1850 | 27.5610 | 49.7490 | H | 0 | 19.9740 | 37.0290 | 36.5460 | C | 0 |
| 52.3580 | 38.1560 | 47.3690 | H | 0 | 36.7570 | 29.1640 | 51.0400 | C | 0 | 20.2140 | 38.0200 | 36.9020 | H | 0 |
| 51.2720 | 36.9870 | 48.2420 | H | 0 | 37.3640 | 28.7100 | 51.8100 | H | 0 | 20.7610 | 35.8420 | 36.9500 | C | 0 |
| 52.9220 | 32.7290 | 50.6180 | C | 0 | 36.1140 | 30.3680 | 51.3270 | C | 0 | 21.5410 | 36.0210 | 37.6760 | H | 0 |
| 53.4060 | 31.8270 | 49.8870 | O | 0 | 36.2150 | 31.0960 | 52.4970 | O | 0 | 20.3660 | 34.5340 | 36.5440 | C | 0 |
| 51.6150 | 32.7640 | 50.9620 | N | 0 | 35.5740 | 31.8090 | 52.4630 | H | 0 | 23.1600 | 31.0170 | 36.3360 | C | 0 |
| 51.2420 | 33.5080 | 51.5340 | H | 0 | 35.4350 | 30.9450 | 50.2590 | C | 0 | 22.5140 | 30.2520 | 35.6310 | O | 0 |
| 50.6300 | 31.8850 | 50.4580 | C | 0 | 35.0800 | 31.9560 | 50.3940 | H | 0 | 24.4040 | 31.4420 | 36.0820 | N | 0 |
| 51.0320 | 31.1620 | 49.7480 | H | 0 | 35.5060 | 30.4470 | 48.9830 | C | 0 | 25.0530 | 31.9430 | 36.6710 | H | 0 |
| 50.0560 | 31.1680 | 51.6810 | C | 0 | 35.0710 | 31.0810 | 48.2250 | H | 0 | 25.1700 | 30.9190 | 34.9150 | C | 0 |
| 49.9230 | 31.8710 | 52.5040 | H | 0 | 37.4230 | 27.5700 | 45.3830 | C | 0 | 24.5340 | 30.9820 | 34.0320 | H | 0 |
| 49.0710 | 30.7210 | 51.5520 | H | 0 | 37.9400 | 28.1250 | 44.3960 | O | 0 | 26.3530 | 31.8370 | 34.5900 | C | 0 |
| 50.8720 | 30.0340 | 52.2860 | C | 0 | 36.6190 | 26.4380 | 45.3040 | N | 0 | 26.0070 | 32.8700 | 34.5660 | H | 0 |
| 51.6820 | 30.3530 | 53.4120 | C | 0 | 36.3730 | 25.9390 | 46.1470 | H | 0 | 27.0530 | 31.7810 | 35.4240 | H | 0 |
| 51.7050 | 31.2990 | 53.9310 | H | 0 | 36.3180 | 25.8320 | 44.0300 | C | 0 | 27.0440 | 31.3710 | 33.2960 | C | 0 |
| 52.5310 | 29.3660 | 53.9710 | C | 0 | 36.0560 | 26.6440 | 43.3520 | H | 0 | 26.6010 | 31.9590 | 32.0630 | C | 0 |
| 53.1250 | 29.4860 | 54.8640 | H | 0 | 37.6300 | 25.1390 | 43.5840 | C | 0 | 25.8420 | 32.7240 | 31.9950 | H | 0 |
| 52.4750 | 28.0620 | 53.4970 | C | 0 | 38.2070 | 25.8990 | 43.0570 | H | 0 | 27.2080 | 31.4640 | 30.8410 | C | 0 |
| 53.2730 | 27.0790 | 54.0470 | O | 0 | 38.1680 | 24.8750 | 44.4940 | H | 0 | 26.9760 | 31.8390 | 29.8550 | H | 0 |
| 52.9850 | 26.2020 | 53.7830 | H | 0 | 37.4380 | 24.0200 | 42.7610 | O | 0 | 28.1880 | 30.4820 | 30.8940 | C | 0 |
| 51.5940 | 27.7140 | 52.4670 | C | 0 | 36.9520 | 24.2740 | 41.9730 | H | 0 | 28.6180 | 30.1240 | 29.9700 | H | 0 |
| 51.5570 | 26.7280 | 52.0260 | H | 0 | 35.1380 | 24.9260 | 44.2190 | C | 0 | 28.5960 | 29.8890 | 32.1220 | C | 0 |
| 50.8490 | 28.7440 | 51.8450 | C | 0 | 35.1850 | 23.9540 | 45.0230 | O | 0 | 29.2830 | 29.0580 | 32.1770 | H | 0 |
| 50.3140 | 28.5130 | 50.9360 | H | 0 | 33.9960 | 25.2480 | 43.6690 | N | 0 | 27.9960 | 30.3240 | 33.3260 | C | 0 |
| 49.5400 | 32.6540 | 49.7230 | C | 0 | 34.0180 | 25.9460 | 42.9400 | H | 0 | 28.3700 | 29.9030 | 34.2470 | H | 0 |
| 49.5350 | 33.8810 | 49.8170 | O | 0 | 32.6870 | 24.7590 | 44.1120 | C | 0 | 25.5080 | 29.4910 | 35.1140 | C | 0 |
| 48.8670 | 31.9270 | 48.8310 | N | 0 | 32.6710 | 23.6690 | 44.0960 | H | 0 | 25.5610 | 28.7480 | 34.1950 | O | 0 |
| 49.2290 | 30.9890 | 48.7410 | H | 0 | 32.6490 | 25.0870 | 45.1510 | H | 0 | 25.6760 | 29.0150 | 36.3680 | N | 0 |
| 47.7240 | 32.3750 | 47.9970 | C | 0 | 31.4990 | 25.2550 | 43.3490 | C | 0 | 25.4300 | 29.6080 | 37.1480 | H | 0 |
| 47.3800 | 33.3540 | 48.3280 | H | 0 | 30.6480 | 25.9030 | 43.9420 | O | 0 | 26.1120 | 27.6030 | 36.6950 | C | 0 |
| 48.2610 | 32.5580 | 46.6060 | C | 0 | 31.4750 | 25.0680 | 42.0220 | N | 0 | 26.9660 | 27.3420 | 36.0700 | H | 0 |
| 48.6900 | 31.5860 | 46.3620 | H | 0 | 32.2090 | 24.4770 | 41.6590 | H | 0 | 26.5390 | 27.6290 | 37.6970 | H | 0 |
| 47.0860 | 32.9190 | 45.6550 | C | 0 | 30.5540 | 25.8740 | 41.1630 | C | 0 | 25.0160 | 26.6240 | 36.5940 | C | 0 |
| 47.5710 | 33.0040 | 44.6830 | H | 0 | 30.9170 | 26.8900 | 41.3160 | H | 0 | 25.1340 | 25.4680 | 36.8000 | O | 0 |
| 46.5710 | 31.9820 | 45.4430 | H | 0 | 30.7920 | 25.5950 | 39.6640 | C | 0 | 23.7930 | 27.0440 | 36.2590 | N | 0 |
| 46.4630 | 33.7650 | 45.9460 | H | 0 | 31.8720 | 25.5240 | 39.5350 | H | 0 | 23.6650 | 28.0130 | 36.0020 | H | 0 |
| 49.2970 | 33.6540 | 46.3350 | C | 0 | 30.1780 | 24.2050 | 39.2300 | C | 0 | 22.4790 | 26.2830 | 36.1870 | C | 0 |
| 48.7950 | 34.6180 | 46.2560 | H | 0 | 29.0970 | 24.1050 | 39.3360 | H | 0 | 22.2510 | 26.0520 | 37.2270 | H | 0 |
| 49.9360 | 33.7460 | 47.2140 | H | 0 | 30.4640 | 23.9410 | 38.2120 | H | 0 | 21.4100 | 27.1550 | 35.5920 | C | 0 |
| 49.8900 | 33.3720 | 45.4660 | H | 0 | 30.5080 | 23.4390 | 39.9310 | H | 0 | 21.4730 | 28.1340 | 36.0660 | H | 0 |
| 46.5520 | 31.3560 | 48.0630 | C | 0 | 30.2790 | 26.7350 | 38.7160 | C | 0 | 21.6390 | 27.4720 | 34.1090 | C | 0 |
| 46.7730 | 30.1900 | 48.2220 | O | 0 | 30.6820 | 27.6700 | 39.1040 | H | 0 | 22.6690 | 27.7650 | 33.9080 | H | 0 |
| 45.3090 | 31.7840 | 48.1700 | N | 0 | 30.7640 | 26.5500 | 37.7570 | H | 0 | 21.3590 | 26.6130 | 33.4990 | H | 0 |
| 45.1390 | 32.7800 | 48.1940 | H | 0 | 29.1950 | 26.7310 | 38.6030 | H | 0 | 20.9360 | 28.2240 | 33.7500 | H | 0 |
| 44.2110 | 30.8890 | 48.4360 | C | 0 | 29.0730 | 25.8130 | 41.4680 | C | 0 | 20.0230 | 26.6010 | 35.7890 | C | 0 |
| 44.3900 | 29.9130 | 47.9850 | H | 0 | 28.5650 | 24.7270 | 41.6740 | O | 0 | 19.8470 | 25.5940 | 35.4120 | H | 0 |
| 44.1180 | 30.7360 | 49.9580 | C | 0 | 28.4440 | 26.9760 | 41.4210 | N | 0 | 19.8850 | 26.4320 | 36.8570 | H | 0 |
| 45.0820 | 30.3470 | 50.2850 | H | 0 | 29.0350 | 27.7850 | 41.2890 | H | 0 | 18.9070 | 27.4380 | 35.1890 | C | 0 |
| 43.8860 | 31.6950 | 50.4210 | H | 0 | 26.9670 | 27.2820 | 41.8010 | C | 0 | 19.0290 | 28.4850 | 35.4630 | H | 0 |
| 43.3800 | 29.9830 | 50.2340 | H | 0 | 26.3720 | 26.3690 | 41.7730 | H | 0 | 18.9720 | 27.3750 | 34.1030 | H | 0 |
| 42.8410 | 31.2570 | 47.8060 | C | 0 | 27.0220 | 27.5090 | 42.8650 | H | 0 | 17.9550 | 27.1250 | 35.6180 | H | 0 |
| 42.5120 | 32.4500 | 47.7540 | O | 0 | 26.3750 | 28.4320 | 40.9680 | C | 0 | 22.5810 | 24.9660 | 35.5230 | C | 0 |
| 42.0560 | 30.2400 | 47.4430 | N | 0 | 27.0470 | 28.9240 | 40.0720 | O | 0 | 22.1110 | 24.0060 | 36.0820 | O | 0 |

|         |         |         |   |   |         |         |         |   |   |         |         |         |   |   |
|---------|---------|---------|---|---|---------|---------|---------|---|---|---------|---------|---------|---|---|
| 23.3970 | 24.8770 | 34.4300 | N | 0 | 16.7680 | 24.4160 | 36.5480 | H | 0 | 15.0370 | 29.3640 | 27.4430 | C | 0 |
| 23.7440 | 25.7230 | 34.0020 | H | 0 | 17.3220 | 25.1500 | 35.1670 | H | 0 | 15.6730 | 30.1060 | 26.9600 | H | 0 |
| 23.4970 | 23.6250 | 33.6610 | C | 0 | 15.9120 | 24.0190 | 35.0440 | H | 0 | 13.7030 | 29.6430 | 26.8470 | C | 0 |
| 22.4810 | 23.2320 | 33.6870 | H | 0 | 17.1880 | 21.8350 | 35.8630 | C | 0 | 13.0250 | 28.8980 | 27.2640 | H | 0 |
| 23.9390 | 24.0090 | 32.2090 | C | 0 | 16.4330 | 21.4800 | 35.1610 | H | 0 | 13.3290 | 30.6030 | 27.2020 | H | 0 |
| 23.9290 | 23.1140 | 31.5880 | H | 0 | 17.9640 | 21.1010 | 36.0800 | H | 0 | 13.6970 | 29.3760 | 25.3320 | C | 0 |
| 23.2860 | 24.8000 | 31.8410 | H | 0 | 16.6620 | 22.1000 | 36.7800 | H | 0 | 13.2060 | 28.2280 | 24.7840 | C | 0 |
| 24.9440 | 24.4290 | 32.1740 | H | 0 | 19.8520 | 21.3440 | 32.3860 | C | 0 | 12.7290 | 27.5250 | 25.4520 | H | 0 |
| 24.4030 | 22.5230 | 34.2530 | C | 0 | 20.8670 | 21.8890 | 32.0680 | O | 0 | 13.2490 | 27.9520 | 23.4030 | C | 0 |
| 24.2030 | 21.3410 | 34.0030 | O | 0 | 19.2490 | 20.4800 | 31.5780 | N | 0 | 12.7290 | 27.0660 | 23.0700 | H | 0 |
| 25.2900 | 22.9080 | 35.1760 | N | 0 | 17.9200 | 19.8750 | 31.7250 | C | 0 | 13.7560 | 28.9120 | 22.5380 | C | 0 |
| 25.4670 | 23.8910 | 35.3230 | H | 0 | 17.1400 | 20.6370 | 31.7170 | H | 0 | 13.7200 | 28.6070 | 21.1380 | O | 0 |
| 26.0260 | 21.9290 | 35.9760 | C | 0 | 17.8880 | 19.3410 | 32.6750 | H | 0 | 14.2420 | 29.1830 | 20.5760 | H | 0 |
| 25.8540 | 20.9140 | 35.6160 | H | 0 | 17.5950 | 18.9910 | 30.5060 | C | 0 | 14.3230 | 30.1070 | 23.0370 | C | 0 |
| 27.5700 | 22.1740 | 35.9610 | C | 0 | 16.8340 | 19.4310 | 29.8620 | H | 0 | 14.7470 | 30.7590 | 22.2870 | H | 0 |
| 27.9810 | 21.3880 | 36.5950 | H | 0 | 17.2920 | 17.9950 | 30.8310 | H | 0 | 14.3610 | 30.2990 | 24.4730 | C | 0 |
| 28.2430 | 21.9910 | 34.6020 | C | 0 | 19.0640 | 18.9850 | 29.8740 | C | 0 | 14.6960 | 31.2100 | 24.9460 | H | 0 |
| 27.7940 | 22.6670 | 33.8740 | H | 0 | 18.9370 | 18.9230 | 28.7930 | H | 0 | 14.9600 | 29.3970 | 29.0690 | C | 0 |
| 29.2960 | 22.2680 | 34.5460 | H | 0 | 19.7090 | 18.1840 | 30.2330 | H | 0 | 14.6530 | 30.4370 | 29.6000 | O | 0 |
| 28.0900 | 20.9400 | 34.3580 | H | 0 | 19.6960 | 20.2260 | 30.2090 | C | 0 | 15.2220 | 28.3070 | 29.7890 | N | 0 |
| 27.9980 | 23.5060 | 36.5620 | C | 0 | 20.7750 | 20.0690 | 30.2250 | H | 0 | 15.5050 | 27.4800 | 29.2830 | H | 0 |
| 27.3840 | 24.3010 | 36.1370 | H | 0 | 19.2910 | 21.3280 | 29.2090 | C | 0 | 15.0460 | 28.1290 | 31.2620 | C | 0 |
| 27.8960 | 23.4250 | 37.6440 | H | 0 | 18.2920 | 22.0080 | 29.4210 | O | 0 | 14.0630 | 28.4860 | 31.5690 | H | 0 |
| 29.0660 | 23.6610 | 36.4140 | H | 0 | 19.9400 | 21.4320 | 28.0380 | N | 0 | 15.1710 | 26.6340 | 31.5060 | C | 0 |
| 25.6320 | 21.8500 | 37.4510 | C | 0 | 21.0780 | 20.6390 | 27.6660 | C | 0 | 16.1070 | 26.2810 | 31.0740 | H | 0 |
| 25.7890 | 20.7570 | 38.0090 | O | 0 | 21.0110 | 19.5520 | 27.6900 | H | 0 | 15.1680 | 26.4660 | 32.5830 | H | 0 |
| 25.0470 | 22.9260 | 38.0090 | N | 0 | 21.9420 | 20.9340 | 28.2620 | H | 0 | 14.3120 | 26.1490 | 31.0430 | H | 0 |
| 24.9030 | 23.7820 | 37.4930 | H | 0 | 21.3710 | 20.9920 | 26.1950 | C | 0 | 16.1090 | 28.9870 | 31.9820 | C | 0 |
| 24.7620 | 22.9760 | 39.4860 | C | 0 | 20.8070 | 20.3660 | 25.5030 | H | 0 | 17.2760 | 28.9300 | 31.6150 | O | 0 |
| 25.4050 | 22.2540 | 39.9890 | H | 0 | 22.4380 | 20.9230 | 25.9850 | H | 0 | 15.7000 | 29.6780 | 33.0110 | N | 0 |
| 25.3080 | 24.2660 | 39.9460 | C | 0 | 20.8350 | 22.4680 | 26.0190 | C | 0 | 14.7710 | 29.4280 | 33.3190 | H | 0 |
| 25.0130 | 25.0990 | 39.3080 | H | 0 | 20.6140 | 22.6050 | 24.9600 | H | 0 | 16.4040 | 30.7510 | 33.6510 | C | 0 |
| 24.9750 | 24.4850 | 40.9600 | H | 0 | 21.5200 | 23.1990 | 26.4480 | H | 0 | 16.0450 | 30.9410 | 34.6630 | H | 0 |
| 26.3960 | 24.2610 | 39.8870 | H | 0 | 19.5950 | 22.3730 | 26.8900 | C | 0 | 17.4260 | 30.4860 | 33.9210 | H | 0 |
| 23.3210 | 22.7080 | 39.9040 | C | 0 | 19.2770 | 23.3080 | 27.3520 | H | 0 | 16.6730 | 31.9910 | 32.8170 | C | 0 |
| 23.1430 | 21.9800 | 40.8990 | O | 0 | 18.3600 | 21.8500 | 26.1240 | C | 0 | 17.7740 | 32.5710 | 32.8920 | O | 0 |
| 22.2580 | 23.1910 | 39.1690 | N | 0 | 17.8930 | 22.5210 | 25.2380 | O | 0 | 15.7220 | 32.3590 | 31.8890 | N | 0 |
| 22.4260 | 23.8580 | 38.4300 | H | 0 | 17.7750 | 20.7460 | 26.4850 | N | 0 | 14.8020 | 31.9460 | 31.9500 | H | 0 |
| 20.9220 | 22.4770 | 39.2730 | C | 0 | 18.2190 | 20.1980 | 27.2080 | H | 0 | 15.7480 | 33.5220 | 30.9850 | C | 0 |
| 20.8770 | 21.8960 | 40.1940 | H | 0 | 16.4910 | 20.2180 | 25.9510 | C | 0 | 14.7610 | 33.5140 | 30.5240 | H | 0 |
| 19.7000 | 23.4350 | 39.2640 | C | 0 | 16.6740 | 19.9230 | 24.9170 | H | 0 | 15.9930 | 34.8750 | 31.6440 | C | 0 |
| 19.8180 | 24.0260 | 38.3560 | H | 0 | 16.0860 | 18.9440 | 26.6670 | C | 0 | 16.9520 | 34.9590 | 32.1550 | H | 0 |
| 18.7330 | 22.9320 | 39.2430 | H | 0 | 15.4830 | 19.1690 | 27.5470 | H | 0 | 16.0890 | 35.5410 | 30.7860 | H | 0 |
| 19.7570 | 24.4360 | 40.4640 | C | 0 | 15.4560 | 18.3620 | 25.9950 | H | 0 | 14.9490 | 35.5320 | 32.5680 | C | 0 |
| 19.6980 | 23.7990 | 41.3470 | H | 0 | 17.2290 | 17.8930 | 26.9330 | C | 0 | 14.0380 | 35.6270 | 31.9770 | H | 0 |
| 20.7000 | 24.9790 | 40.5400 | H | 0 | 18.2240 | 17.9000 | 26.1920 | O | 0 | 14.7130 | 34.7380 | 33.8150 | C | 0 |
| 18.6410 | 25.4160 | 40.6010 | C | 0 | 16.9020 | 16.9510 | 27.6930 | O | 0 | 14.2650 | 33.7970 | 33.4960 | H | 0 |
| 17.7930 | 25.6000 | 39.7460 | O | 0 | 15.2610 | 21.1630 | 25.9990 | C | 0 | 15.5780 | 34.5840 | 34.4600 | H | 0 |
| 18.5110 | 26.0380 | 41.7550 | N | 0 | 14.3150 | 20.8630 | 25.3050 | O | 0 | 14.0410 | 35.3320 | 34.4330 | H | 0 |
| 17.8480 | 26.7950 | 41.8430 | H | 0 | 15.3640 | 22.2110 | 26.8580 | N | 0 | 15.5250 | 36.8760 | 32.9450 | C | 0 |
| 19.0600 | 25.8280 | 42.5750 | H | 0 | 16.1850 | 22.3630 | 27.4260 | H | 0 | 16.4890 | 36.7990 | 33.4480 | H | 0 |
| 20.7810 | 21.4450 | 38.1880 | C | 0 | 14.5210 | 23.4950 | 26.7730 | C | 0 | 15.6680 | 37.5910 | 32.1340 | H | 0 |
| 19.7360 | 20.7980 | 38.1490 | O | 0 | 14.0120 | 23.5190 | 25.8100 | H | 0 | 14.8020 | 37.3660 | 33.5960 | H | 0 |
| 21.8520 | 21.2610 | 37.3620 | N | 0 | 13.4580 | 23.5110 | 27.9150 | C | 0 | 16.6460 | 33.1970 | 29.8230 | C | 0 |
| 22.4940 | 22.0360 | 37.4430 | H | 0 | 12.8380 | 22.6200 | 27.8210 | H | 0 | 16.9230 | 34.0580 | 29.0170 | O | 0 |
| 22.0080 | 20.3040 | 36.3160 | C | 0 | 13.9900 | 23.4470 | 28.8640 | H | 0 | 17.0630 | 31.9360 | 29.6020 | N | 0 |
| 22.9420 | 20.5220 | 35.7970 | H | 0 | 12.6890 | 24.8200 | 27.8580 | C | 0 | 16.5800 | 31.2150 | 30.1190 | H | 0 |
| 22.2130 | 18.9910 | 37.0140 | C | 0 | 12.0480 | 25.2800 | 28.8600 | O | 0 | 18.1910 | 31.6850 | 28.5920 | C | 0 |
| 22.5180 | 19.0430 | 38.0590 | H | 0 | 12.4210 | 25.2290 | 26.7080 | O | 0 | 17.8280 | 30.8580 | 27.9820 | H | 0 |
| 21.2340 | 18.5110 | 36.9900 | H | 0 | 15.5830 | 24.6810 | 26.8980 | C | 0 | 18.2670 | 32.4410 | 27.8110 | H | 0 |
| 23.0880 | 18.1260 | 36.2420 | C | 0 | 16.0150 | 25.0510 | 27.9930 | O | 0 | 19.4860 | 31.3240 | 29.2140 | C | 0 |
| 24.3190 | 18.4390 | 36.1660 | O | 0 | 15.9140 | 25.3580 | 25.7580 | N | 0 | 20.3750 | 30.9900 | 28.4450 | O | 0 |
| 22.6610 | 17.0790 | 35.6240 | N | 0 | 15.5300 | 24.8200 | 24.4110 | C | 0 | 19.6320 | 31.2320 | 30.5350 | N | 0 |
| 23.3590 | 16.5840 | 35.0870 | H | 0 | 14.5780 | 25.2670 | 24.1220 | H | 0 | 18.8060 | 31.5970 | 30.9860 | H | 0 |
| 21.7250 | 16.7060 | 35.6960 | H | 0 | 15.4580 | 23.7390 | 24.5300 | H | 0 | 20.8310 | 30.8080 | 31.2810 | C | 0 |
| 20.9620 | 20.3580 | 35.1910 | C | 0 | 16.6720 | 25.3760 | 23.5030 | C | 0 | 21.6410 | 31.4690 | 30.9740 | H | 0 |
| 20.5940 | 19.3030 | 34.6650 | O | 0 | 16.3000 | 25.4830 | 22.4840 | H | 0 | 20.6620 | 31.0870 | 32.7460 | C | 0 |
| 20.4570 | 21.5430 | 34.8300 | N | 0 | 17.4520 | 24.6640 | 23.7710 | H | 0 | 21.6010 | 31.1560 | 33.2960 | H | 0 |
| 20.6930 | 22.3800 | 35.3420 | H | 0 | 17.1400 | 26.7420 | 24.2370 | C | 0 | 20.2440 | 32.0910 | 32.8150 | H | 0 |
| 19.3160 | 21.5610 | 33.8630 | C | 0 | 16.6180 | 27.6620 | 23.9710 | H | 0 | 19.8860 | 30.3980 | 33.0810 | H | 0 |
| 18.6290 | 20.7350 | 34.0450 | H | 0 | 18.2090 | 26.9040 | 24.1050 | H | 0 | 21.2400 | 29.4010 | 30.8800 | C | 0 |
| 18.4490 | 22.8400 | 33.9790 | C | 0 | 16.9400 | 26.4290 | 25.7390 | C | 0 | 22.4090 | 29.2250 | 30.3650 | O | 0 |
| 18.9560 | 23.7330 | 33.6150 | H | 0 | 17.9240 | 26.1340 | 26.1020 | H | 0 | 20.3270 | 28.4040 | 30.9560 | N | 0 |
| 17.5990 | 22.5860 | 33.3460 | H | 0 | 16.7200 | 27.7340 | 26.5940 | C | 0 | 19.3820 | 28.5590 | 31.2770 | H | 0 |
| 17.8660 | 23.0600 | 35.3930 | C | 0 | 17.7190 | 28.4120 | 26.8070 | O | 0 | 20.7160 | 27.0360 | 30.3650 | C | 0 |
| 18.7040 | 23.2680 | 36.0580 | H | 0 | 15.5020 | 28.0860 | 26.9650 | N | 0 | 21.6510 | 26.7540 | 30.8510 | H | 0 |
| 16.8910 | 24.2020 | 35.4870 | C | 0 | 14.7370 | 27.4770 | 26.7120 | H | 0 | 19.6550 | 25.9990 | 30.6870 | C | 0 |

|         |         |         |   |   |         |         |         |   |   |         |         |         |   |   |
|---------|---------|---------|---|---|---------|---------|---------|---|---|---------|---------|---------|---|---|
| 19.2620 | 26.3510 | 31.6410 | H | 0 | 25.3570 | 28.6700 | 20.1640 | N | 0 | 33.7270 | 21.6560 | 30.4130 | N | 0 |
| 18.5560 | 26.1030 | 29.6660 | C | 0 | 25.1030 | 27.9330 | 19.5230 | H | 0 | 32.8530 | 21.9670 | 30.0150 | H | 0 |
| 18.9570 | 25.8750 | 28.6780 | H | 0 | 25.3380 | 29.6430 | 19.8950 | H | 0 | 34.6530 | 22.5600 | 31.1000 | C | 0 |
| 17.7500 | 25.4120 | 29.9120 | H | 0 | 27.7640 | 27.3290 | 24.3540 | C | 0 | 35.6390 | 22.5470 | 30.6350 | H | 0 |
| 18.1750 | 27.1240 | 29.6850 | H | 0 | 28.4810 | 27.0350 | 23.4340 | O | 0 | 34.0340 | 23.9560 | 31.0720 | C | 0 |
| 20.2710 | 24.6090 | 30.9320 | C | 0 | 28.1970 | 27.7640 | 25.5360 | N | 0 | 33.9060 | 24.3940 | 30.0820 | H | 0 |
| 21.0390 | 24.3350 | 30.2090 | H | 0 | 27.4920 | 28.0940 | 26.1800 | H | 0 | 33.0320 | 23.9680 | 31.5020 | H | 0 |
| 20.7830 | 24.6100 | 31.8950 | H | 0 | 29.5890 | 27.7590 | 26.0590 | C | 0 | 34.5550 | 24.6730 | 31.7080 | H | 0 |
| 19.4700 | 23.8720 | 31.0020 | H | 0 | 30.2110 | 28.2940 | 25.3400 | H | 0 | 34.8680 | 22.1090 | 32.5750 | C | 0 |
| 21.1260 | 27.0060 | 28.8920 | C | 0 | 29.6670 | 28.7130 | 27.2830 | C | 0 | 36.0660 | 22.0600 | 33.0210 | O | 0 |
| 21.8030 | 26.0560 | 28.4360 | O | 0 | 29.1550 | 29.6560 | 27.0930 | H | 0 | 33.8730 | 21.8540 | 33.4720 | N | 0 |
| 20.6400 | 28.0560 | 28.2130 | N | 0 | 29.0890 | 28.1190 | 27.9920 | H | 0 | 32.9490 | 21.9640 | 33.0790 | H | 0 |
| 20.2140 | 28.8420 | 28.6810 | H | 0 | 30.6680 | 28.8690 | 27.6850 | H | 0 | 34.0670 | 21.5670 | 34.9080 | C | 0 |
| 21.0610 | 28.3600 | 26.8640 | C | 0 | 30.2320 | 26.3640 | 26.5190 | C | 0 | 35.0330 | 21.0630 | 34.9570 | H | 0 |
| 20.9200 | 27.5680 | 26.1280 | H | 0 | 31.3360 | 26.3920 | 27.0320 | O | 0 | 34.3360 | 22.9250 | 35.5880 | C | 0 |
| 20.5180 | 29.2430 | 26.5260 | H | 0 | 29.5310 | 25.2560 | 26.3820 | N | 0 | 35.1250 | 23.4590 | 35.0590 | H | 0 |
| 22.4970 | 28.7710 | 26.7360 | C | 0 | 28.6460 | 25.3180 | 25.8990 | H | 0 | 33.0650 | 23.7630 | 35.7270 | C | 0 |
| 23.2020 | 28.0210 | 26.1020 | O | 0 | 30.0190 | 23.9090 | 26.7440 | C | 0 | 32.2340 | 23.3610 | 36.3080 | H | 0 |
| 22.8860 | 29.9020 | 27.2880 | N | 0 | 29.3960 | 23.1090 | 26.3420 | H | 0 | 33.4030 | 24.6910 | 36.1890 | H | 0 |
| 22.2420 | 30.4880 | 27.7990 | H | 0 | 30.9860 | 23.8290 | 26.2470 | H | 0 | 32.7170 | 23.9890 | 34.7190 | H | 0 |
| 24.3250 | 30.3500 | 27.1910 | C | 0 | 30.1990 | 23.6890 | 28.2560 | C | 0 | 34.7450 | 22.6650 | 36.9430 | O | 0 |
| 24.6420 | 30.3030 | 26.1490 | H | 0 | 31.1000 | 22.9140 | 28.6190 | O | 0 | 35.6300 | 22.2950 | 36.9380 | H | 0 |
| 24.5700 | 31.7980 | 27.6860 | C | 0 | 29.4820 | 24.3360 | 29.2170 | N | 0 | 32.9720 | 20.6750 | 35.5910 | C | 0 |
| 25.6340 | 32.0210 | 27.7610 | H | 0 | 28.8520 | 25.0950 | 29.0020 | H | 0 | 32.1790 | 20.0500 | 34.9060 | O | 0 |
| 23.8780 | 32.7380 | 26.7070 | C | 0 | 29.9510 | 24.1580 | 30.6280 | C | 0 | 32.8560 | 20.5920 | 36.9010 | N | 0 |
| 24.0670 | 33.7720 | 26.9960 | H | 0 | 30.9400 | 24.6130 | 30.5730 | H | 0 | 33.4400 | 21.1960 | 37.4610 | H | 0 |
| 24.1260 | 32.4930 | 25.6740 | H | 0 | 29.0020 | 25.0250 | 31.5180 | C | 0 | 31.7730 | 19.8540 | 37.7220 | C | 0 |
| 22.7880 | 32.7460 | 26.6980 | H | 0 | 28.6420 | 25.9220 | 31.0140 | H | 0 | 30.8520 | 19.8390 | 37.1390 | H | 0 |
| 23.8110 | 32.0080 | 29.0770 | C | 0 | 28.1200 | 24.4790 | 31.8530 | H | 0 | 32.1550 | 18.3660 | 37.8380 | C | 0 |
| 22.7420 | 31.8040 | 29.0220 | H | 0 | 29.6150 | 25.4350 | 32.8770 | C | 0 | 32.4570 | 17.8610 | 36.9210 | H | 0 |
| 24.1930 | 31.3740 | 29.8770 | H | 0 | 29.9130 | 24.5520 | 33.4420 | H | 0 | 32.9850 | 17.9980 | 39.0550 | C | 0 |
| 23.9950 | 33.0320 | 29.4010 | H | 0 | 30.8130 | 26.3770 | 32.9140 | C | 0 | 33.7950 | 17.3720 | 38.6820 | H | 0 |
| 25.3280 | 29.4050 | 27.9870 | C | 0 | 30.8840 | 27.0270 | 33.7860 | H | 0 | 33.5080 | 18.8600 | 39.4710 | H | 0 |
| 26.3600 | 29.0600 | 27.4560 | O | 0 | 31.8240 | 25.9710 | 32.9030 | H | 0 | 32.3470 | 17.5990 | 39.8440 | H | 0 |
| 24.8740 | 28.7420 | 29.1060 | N | 0 | 30.7400 | 26.9910 | 32.0160 | H | 0 | 30.9210 | 17.7270 | 38.0370 | O | 0 |
| 24.0060 | 29.0500 | 29.5190 | H | 0 | 28.5090 | 25.9670 | 33.8530 | C | 0 | 30.4610 | 17.5330 | 37.2180 | H | 0 |
| 25.8100 | 27.7950 | 29.8040 | C | 0 | 28.9380 | 26.3110 | 34.7940 | H | 0 | 31.4940 | 20.5430 | 39.1120 | C | 0 |
| 26.7970 | 28.1880 | 30.0510 | H | 0 | 27.8490 | 26.5950 | 33.2540 | H | 0 | 32.1030 | 21.5500 | 39.4150 | O | 0 |
| 25.2670 | 27.5950 | 31.2430 | C | 0 | 27.8890 | 25.1230 | 34.1550 | H | 0 | 30.5170 | 20.0940 | 39.8820 | N | 0 |
| 25.2650 | 28.5990 | 31.6680 | H | 0 | 30.0250 | 22.7120 | 31.2440 | C | 0 | 29.8620 | 19.4280 | 39.4990 | H | 0 |
| 24.3120 | 27.0740 | 31.3180 | H | 0 | 31.0560 | 22.4560 | 31.9150 | O | 0 | 30.4000 | 20.6840 | 41.2200 | C | 0 |
| 25.9710 | 27.0560 | 31.8770 | H | 0 | 29.1690 | 21.7100 | 31.0120 | N | 0 | 30.4090 | 21.7440 | 40.9630 | H | 0 |
| 26.1420 | 26.5170 | 29.0220 | C | 0 | 27.8580 | 21.8400 | 30.3650 | C | 0 | 28.9460 | 20.4140 | 41.8490 | C | 0 |
| 27.3250 | 26.1480 | 28.8170 | O | 0 | 27.8120 | 22.0070 | 29.2890 | H | 0 | 28.9480 | 20.9440 | 42.8010 | H | 0 |
| 25.1090 | 26.0050 | 28.3300 | N | 0 | 27.2670 | 22.5090 | 30.9900 | H | 0 | 27.7580 | 20.9860 | 41.1100 | C | 0 |
| 24.2030 | 26.4450 | 28.4060 | H | 0 | 27.0850 | 20.5210 | 30.5610 | C | 0 | 26.8980 | 20.9300 | 41.7780 | H | 0 |
| 25.3760 | 24.8720 | 27.3970 | C | 0 | 26.5520 | 20.3450 | 29.6270 | H | 0 | 27.9300 | 22.0590 | 41.0400 | H | 0 |
| 26.1160 | 24.2320 | 27.8790 | H | 0 | 26.3570 | 20.5790 | 31.3700 | H | 0 | 27.5610 | 20.4420 | 40.1870 | H | 0 |
| 24.0730 | 24.0830 | 27.2050 | C | 0 | 28.2280 | 19.5540 | 30.7510 | C | 0 | 28.7710 | 18.8990 | 42.0770 | C | 0 |
| 23.6410 | 23.7880 | 28.1610 | H | 0 | 28.4830 | 19.1630 | 29.7660 | H | 0 | 27.8100 | 18.6080 | 42.5010 | H | 0 |
| 23.3590 | 24.7470 | 26.7170 | H | 0 | 27.9100 | 18.7000 | 31.3490 | H | 0 | 29.0010 | 18.3190 | 41.1830 | H | 0 |
| 24.3110 | 22.7860 | 26.4230 | C | 0 | 29.4410 | 20.2890 | 31.2980 | C | 0 | 29.4830 | 18.5900 | 42.8430 | H | 0 |
| 23.9900 | 22.7590 | 25.0830 | C | 0 | 29.3350 | 20.2000 | 32.3790 | H | 0 | 31.4600 | 20.3320 | 42.2410 | C | 0 |
| 23.3990 | 23.5290 | 24.6090 | H | 0 | 30.7180 | 19.5650 | 30.8750 | C | 0 | 32.2350 | 19.4010 | 42.1860 | O | 0 |
| 24.1890 | 21.5700 | 24.3560 | C | 0 | 31.1330 | 18.6740 | 31.5740 | O | 0 | 31.4000 | 21.0700 | 43.3770 | N | 0 |
| 23.9340 | 21.4880 | 23.3100 | H | 0 | 31.4350 | 20.0290 | 29.7970 | N | 0 | 30.5510 | 21.6130 | 43.4420 | H | 0 |
| 24.7970 | 20.4890 | 24.9690 | C | 0 | 31.1360 | 20.8570 | 29.3020 | H | 0 | 32.1780 | 20.9120 | 44.5540 | C | 0 |
| 25.1010 | 19.4330 | 24.1760 | O | 0 | 32.7910 | 19.5770 | 29.3840 | C | 0 | 31.8570 | 20.0220 | 45.0940 | H | 0 |
| 25.6750 | 18.8060 | 24.6210 | H | 0 | 32.8690 | 18.5070 | 29.5770 | H | 0 | 33.2530 | 20.8630 | 44.3770 | H | 0 |
| 25.0370 | 20.5420 | 26.3600 | C | 0 | 32.9250 | 19.9070 | 27.8620 | C | 0 | 31.9260 | 22.0130 | 45.6400 | C | 0 |
| 25.3650 | 19.6800 | 26.9220 | H | 0 | 32.1430 | 19.4010 | 27.2950 | H | 0 | 30.8530 | 22.5900 | 45.7550 | O | 0 |
| 24.8720 | 21.7380 | 27.1200 | C | 0 | 32.7820 | 20.9830 | 27.7600 | H | 0 | 32.9700 | 22.2850 | 46.4200 | N | 0 |
| 25.1030 | 21.8450 | 28.1700 | H | 0 | 34.2190 | 19.3880 | 27.2190 | C | 0 | 33.8590 | 21.8050 | 46.4110 | H | 0 |
| 26.0080 | 25.3510 | 26.1470 | C | 0 | 35.1470 | 19.6790 | 27.7120 | H | 0 | 32.8010 | 23.0770 | 47.6080 | C | 0 |
| 26.7820 | 24.6480 | 25.5090 | O | 0 | 34.2530 | 18.2990 | 27.2470 | H | 0 | 32.5640 | 24.1240 | 47.4220 | H | 0 |
| 25.6170 | 26.5180 | 25.6230 | N | 0 | 34.2760 | 19.8500 | 25.7570 | C | 0 | 31.9250 | 22.7650 | 48.1770 | H | 0 |
| 24.7890 | 26.9240 | 26.0340 | H | 0 | 33.5890 | 19.2200 | 25.1930 | H | 0 | 34.0420 | 22.9830 | 48.4980 | C | 0 |
| 26.1530 | 27.1060 | 24.3370 | C | 0 | 34.1780 | 20.9350 | 25.7940 | H | 0 | 33.8270 | 22.6550 | 49.6870 | O | 0 |
| 26.0490 | 26.3330 | 23.5760 | H | 0 | 35.6360 | 19.6820 | 25.1370 | C | 0 | 35.2640 | 23.0910 | 47.9250 | N | 0 |
| 25.3700 | 28.4060 | 23.9030 | C | 0 | 36.2670 | 20.4760 | 25.5350 | H | 0 | 35.3240 | 23.3560 | 46.9520 | H | 0 |
| 24.3500 | 28.0480 | 23.7660 | H | 0 | 36.0470 | 18.7030 | 25.3850 | H | 0 | 36.5560 | 22.8710 | 48.6250 | C | 0 |
| 25.4200 | 29.2160 | 24.6300 | H | 0 | 35.7100 | 19.6300 | 23.6240 | N | 0 | 36.2830 | 22.5340 | 49.6250 | H | 0 |
| 25.7680 | 29.1090 | 22.5930 | C | 0 | 34.9250 | 19.0710 | 23.3200 | H | 0 | 37.5250 | 21.7630 | 48.1010 | C | 0 |
| 25.2490 | 30.0660 | 22.5440 | H | 0 | 35.7320 | 20.5390 | 23.1850 | H | 0 | 37.5570 | 21.9310 | 47.0250 | H | 0 |
| 26.8290 | 29.3510 | 22.6500 | H | 0 | 36.5170 | 19.2600 | 23.1430 | H | 0 | 38.5410 | 21.8930 | 48.4740 | H | 0 |
| 25.5030 | 28.1920 | 21.3930 | C | 0 | 33.9110 | 20.4000 | 30.1170 | C | 0 | 37.0730 | 20.3000 | 48.2700 | C | 0 |
| 25.3140 | 26.9960 | 21.4890 | O | 0 | 35.0090 | 19.9730 | 30.3860 | O | 0 | 37.6750 | 19.7450 | 47.5510 | H | 0 |

|         |         |         |   |   |         |         |         |    |   |
|---------|---------|---------|---|---|---------|---------|---------|----|---|
| 37.3860 | 19.9000 | 49.2350 | H | 0 | 46.8030 | 25.4290 | 41.5780 | H  | 0 |
| 35.5340 | 20.0150 | 47.9920 | C | 0 | 47.7610 | 26.4680 | 43.2590 | C  | 0 |
| 34.9180 | 19.3840 | 48.8480 | O | 0 | 48.7440 | 26.2200 | 42.8860 | H  | 0 |
| 34.9030 | 20.3920 | 46.9650 | O | 0 | 50.2620 | 28.2290 | 47.2020 | C  | 0 |
| 37.2560 | 24.2450 | 48.8280 | C | 0 | 50.1460 | 29.3100 | 47.8120 | O  | 0 |
| 37.1600 | 25.1540 | 48.0200 | O | 0 | 51.5190 | 27.7590 | 46.9120 | N  | 0 |
| 38.1150 | 24.3600 | 49.8230 | N | 0 | 51.6390 | 26.9180 | 46.3660 | H  | 0 |
| 38.2740 | 23.5410 | 50.3920 | H | 0 | 52.7840 | 28.4000 | 47.2920 | C  | 0 |
| 39.2320 | 25.3720 | 49.9900 | C | 0 | 52.6480 | 29.4810 | 47.2570 | H  | 0 |
| 38.9770 | 26.3320 | 49.5420 | H | 0 | 53.1310 | 27.9410 | 48.7400 | C  | 0 |
| 39.4990 | 25.7010 | 51.4720 | C | 0 | 53.6100 | 26.9690 | 48.6150 | H  | 0 |
| 38.6400 | 26.2180 | 51.9000 | H | 0 | 53.7100 | 28.6040 | 49.3830 | H  | 0 |
| 39.6020 | 24.7270 | 51.9500 | H | 0 | 52.1400 | 27.8610 | 49.1860 | H  | 0 |
| 40.7200 | 26.4950 | 51.8410 | C | 0 | 53.9290 | 27.9050 | 46.3740 | C  | 0 |
| 41.6270 | 25.9160 | 51.6650 | H | 0 | 53.7750 | 26.9140 | 45.6880 | O  | 0 |
| 40.8210 | 27.8540 | 51.1230 | C | 0 | 55.0750 | 28.6030 | 46.3090 | N  | 0 |
| 40.8480 | 27.6150 | 50.0600 | H | 0 | 55.1440 | 29.4020 | 46.9230 | H  | 0 |
| 39.9210 | 28.4440 | 51.2980 | H | 0 | 56.2400 | 28.1490 | 45.5930 | C  | 0 |
| 41.7210 | 28.2930 | 51.5540 | H | 0 | 55.9380 | 27.8140 | 44.6010 | H  | 0 |
| 40.6290 | 26.8880 | 53.3260 | C | 0 | 57.2320 | 29.3180 | 45.3700 | C  | 0 |
| 41.3790 | 27.5360 | 53.7800 | H | 0 | 57.4300 | 29.7880 | 46.3340 | H  | 0 |
| 39.6610 | 27.2390 | 53.6840 | H | 0 | 58.1670 | 28.8980 | 44.9990 | H  | 0 |
| 40.7580 | 25.9090 | 53.7870 | H | 0 | 56.6300 | 30.4420 | 44.5110 | C  | 0 |
| 40.5140 | 24.8740 | 49.3030 | C | 0 | 55.7060 | 30.8500 | 44.9220 | H  | 0 |
| 40.8540 | 23.7100 | 49.5040 | O | 0 | 57.6760 | 31.5340 | 44.3410 | C  | 0 |
| 41.2210 | 25.6640 | 48.4480 | N | 0 | 57.1390 | 32.4110 | 43.9790 | H  | 0 |
| 40.7600 | 26.5510 | 48.3040 | H | 0 | 57.9050 | 31.9390 | 45.3270 | H  | 0 |
| 42.5130 | 25.4700 | 47.7890 | C | 0 | 58.6270 | 31.1820 | 43.9430 | H  | 0 |
| 42.9290 | 24.5320 | 48.1550 | H | 0 | 56.4360 | 29.8870 | 43.1160 | C  | 0 |
| 42.2750 | 25.0510 | 46.2850 | C | 0 | 55.5920 | 29.1980 | 43.0850 | H  | 0 |
| 41.6980 | 25.8770 | 45.8690 | H | 0 | 56.2500 | 30.6360 | 42.3470 | H  | 0 |
| 43.2440 | 25.0680 | 45.7870 | H | 0 | 57.3340 | 29.4150 | 42.7150 | H  | 0 |
| 41.5250 | 23.8800 | 45.8000 | C | 0 | 56.8200 | 26.9080 | 46.2820 | C  | 0 |
| 40.1070 | 23.8950 | 45.8140 | C | 0 | 56.9030 | 26.8020 | 47.4950 | O  | 0 |
| 39.6710 | 24.7250 | 46.3490 | H | 0 | 57.2940 | 26.0260 | 45.5570 | O  | 0 |
| 39.3040 | 22.9060 | 45.2110 | C | 0 | 21.3290 | 37.4830 | 45.3400 | N  | 0 |
| 38.2720 | 22.9650 | 45.5250 | H | 0 | 22.0680 | 36.4300 | 44.8540 | C  | 0 |
| 39.8570 | 21.7070 | 44.7130 | C | 0 | 23.2080 | 35.7670 | 45.6530 | C  | 0 |
| 39.0170 | 20.6490 | 44.4170 | O | 0 | 24.0350 | 35.0200 | 45.1380 | O  | 0 |
| 38.1090 | 20.8980 | 44.6070 | H | 0 | 23.4490 | 36.2260 | 46.7080 | O  | 0 |
| 41.3390 | 21.6260 | 44.7440 | C | 0 | 21.6920 | 36.2220 | 43.5480 | C  | 0 |
| 41.7750 | 20.7650 | 44.2610 | H | 0 | 20.6940 | 37.0940 | 43.1470 | C  | 0 |
| 42.1160 | 22.6720 | 45.2680 | C | 0 | 20.4550 | 37.8470 | 44.2930 | C  | 0 |
| 43.1890 | 22.6300 | 45.1540 | H | 0 | 19.9380 | 37.1390 | 41.9160 | C  | 0 |
| 43.5920 | 26.5950 | 47.9460 | C | 0 | 20.1300 | 36.3270 | 41.0650 | O  | 0 |
| 43.2590 | 27.8000 | 47.9500 | O | 0 | 18.8970 | 38.2870 | 41.8280 | C  | 0 |
| 44.7720 | 26.1270 | 48.1980 | N | 0 | 18.2270 | 38.4070 | 40.8190 | O  | 0 |
| 44.8020 | 25.1220 | 48.2960 | H | 0 | 18.8480 | 39.1980 | 43.0310 | C  | 0 |
| 45.9300 | 26.9180 | 48.8350 | C | 0 | 17.9770 | 40.2990 | 42.8840 | N  | 0 |
| 45.7070 | 27.9670 | 48.6390 | H | 0 | 17.9110 | 41.2080 | 43.9020 | C  | 0 |
| 46.0090 | 26.5680 | 50.3580 | C | 0 | 16.9940 | 42.4330 | 43.8380 | C  | 0 |
| 46.2130 | 25.5040 | 50.4750 | H | 0 | 16.5640 | 42.8100 | 42.7770 | O  | 0 |
| 47.1450 | 27.4690 | 50.9930 | C | 0 | 16.3890 | 42.9200 | 44.8140 | O  | 0 |
| 48.1570 | 27.0820 | 50.8690 | H | 0 | 18.5710 | 40.9510 | 45.0980 | C  | 0 |
| 47.1400 | 28.4540 | 50.5260 | H | 0 | 19.3210 | 39.7730 | 45.3560 | C  | 0 |
| 47.0690 | 27.3870 | 52.0780 | H | 0 | 19.8350 | 39.5260 | 46.7010 | C  | 0 |
| 44.7350 | 26.9490 | 51.0870 | C | 0 | 19.0920 | 39.1880 | 47.6090 | O  | 0 |
| 43.8360 | 26.4300 | 50.7530 | H | 0 | 21.0100 | 39.6240 | 46.9110 | O  | 0 |
| 44.9030 | 26.7110 | 52.1370 | H | 0 | 19.5820 | 38.9330 | 44.2360 | C  | 0 |
| 44.5570 | 28.0240 | 51.0660 | H | 0 | 21.4540 | 38.0200 | 46.1870 | H  | 0 |
| 47.1750 | 26.6480 | 48.0290 | C | 0 | 18.1870 | 41.6170 | 45.8670 | H  | 0 |
| 47.4330 | 25.4980 | 47.7540 | O | 0 | 22.0970 | 35.4030 | 42.9620 | H  | 0 |
| 47.9220 | 27.6270 | 47.6180 | N | 0 | 16.3050 | 43.1870 | 40.6690 | Yb | 0 |
| 47.7260 | 28.5400 | 48.0030 | H | 0 |         |         |         |    |   |
| 49.0880 | 27.4530 | 46.6820 | C | 0 |         |         |         |    |   |
| 49.3350 | 26.3920 | 46.6470 | H | 0 |         |         |         |    |   |
| 48.7590 | 27.8430 | 45.1830 | C | 0 |         |         |         |    |   |
| 48.5760 | 28.9050 | 45.0210 | H | 0 |         |         |         |    |   |
| 49.6290 | 27.6790 | 44.5470 | H | 0 |         |         |         |    |   |
| 47.5520 | 27.2650 | 44.4590 | C | 0 |         |         |         |    |   |
| 46.1940 | 27.5730 | 44.8240 | C | 0 |         |         |         |    |   |
| 45.9700 | 28.2430 | 45.6410 | H | 0 |         |         |         |    |   |
| 45.1310 | 27.0350 | 44.0590 | C | 0 |         |         |         |    |   |
| 44.1620 | 27.2810 | 44.4690 | H | 0 |         |         |         |    |   |
| 45.2620 | 26.1030 | 42.9830 | C | 0 |         |         |         |    |   |
| 44.3900 | 25.7260 | 42.4710 | H | 0 |         |         |         |    |   |
| 46.6400 | 25.9380 | 42.5170 | C | 0 |         |         |         |    |   |
